# Supplementary material for: Single-cell eQTL mapping in yeast reveals a tradeoff between growth and reproduction
Source: eLife journal article supplement (doi:10.7554/elife.95566), 2024-04-04
Supplement: supp4 [file chrI:46043-138130_605_finemapping.xlsx]

## Sheet: cell_cycle_causals
DATA

## Sheet: causals_round_robin
DATA

## Sheet: assoc_round_robin
seqnames

## Sheet: complete_assoc
DATA

## Sheet: provean_snps
seqnames

## Sheet: GO
GO.ID

## Sheet: KEGG
ID

## Sheet: GO_raw
GO.ID

## Sheet: directional_hotspot_distal
gene

## Sheet: directional_hotspot_local
DATA

[truncated: 2 more sheets: genes_in_region, eqtl_region]
