# Supplementary material for: Single-cell eQTL mapping in yeast reveals a tradeoff between growth and reproduction
Source: eLife. 2025 Mar 12;13:RP95566. doi: 10.7554/eLife.95566 (PMC11903034; doi:10.7554/eLife.95566)
Supplement: Supplementary file 1. [file elife-95566-supp1.xlsx]

## Sheet: TableS1. Yeast Strains
Table S1: Yeast strains used in this study
Strains used in this study.
Strain	Parent 1	Parent 2	Name of cross	Magic Marker Plasmid	Used For
YLK3301	YPS163 MatA ho∆::HphMX flo8∆::NatMX (YLK2438)	YJM145 MatAlpha ho∆::HphMX flo8∆::NatMX (YLK2436)	B	MF2 p41neo	Single-cell eQTL and ASE
YLK3004	YJM981 MatAlpha ho∆::HphMX (yST191)	CBS2888 MatA ho∆::KanMX (Box A1 C3)	3004	MF2 p41nat	Single-cell eQTL and ASE
YLK3051	BY MatA (YLK1879)	RM MatAlpha AMN1-BY ho∆::HphMX flo8∆::NatMX (YLK1950)	A	MF2 p41nat	Single-cell eQTL and ASE
YLK1993	BY MatA (YLK1879)	RM MatAlpha AMN1-BY ho∆::HphMX flo8∆::NatMX (YLK1950)	A		Parent of Mata segregants from Albert et al 2018
Strain	Parent(s)	Genotype/details	Alternative Strain Name
YLK3221	BY4741	Mata met15Δ his3Δ1 leu2Δ0 ura3Δ0 nej1Δ::KanMX Gpa1-82W,469S [p415 GalL-Cas9-Cyc1t]
YLK3302	YLK3221	Mata chrVII:113512_C chrVIII:113496_C Gpa1-469S [p415 GalL-Cas9-Cyc1t]	YWM_1
YLK3303	YLK3221	Mata chrVII:113512_C chrVIII:113496_C Gpa1-469S [p415 GalL-Cas9-Cyc1t]	YWM_2
YLK3304	YLK3302	Mata chrVII:113512_C chrVIII:113496_C chrVIII:114674_G chrVIII:114672_T Gpa1-469S Gpa1-82W [p415 GalL-Cas9-Cyc1t]	YWM_7
YLK3305	YLK3303	Mata chrVII:113512_C chrVIII:113496_C chrVIII:114674_G chrVIII:114672_T Gpa1-469S Gpa1-82W [p415 GalL-Cas9-Cyc1t]	YWM_9
YLK3306	YLK3303	Mata chrVII:113512_C chrVIII:113496_C Gpa1-469S	YJbo416
YLK3307	YLK3303	Mata chrVII:113512_C chrVIII:113496_C Gpa1-469S	YJbo417
YLK3308	YLK3305	Mata chrVII:113512_C chrVIII:113496_C chrVIII:114674_G chrVIII:114672_T Gpa1-469S Gpa1-82W	YJbo420
YLK3309	YLK3305	Mata chrVII:113512_C chrVIII:113496_C chrVIII:114674_G chrVIII:114672_T Gpa1-469S Gpa1-82W	YJbo421
YLK3310	YLK3306	Mata chrVII:113512_C chrVIII:113496_C chrVIII:114674_G chrVIII:114672_T Gpa1-469S Gpa1-82W	YJbo422
YLK3311	YLK3306	Mata chrVII:113512_C chrVIII:113496_C chrVIII:114674_G chrVIII:114672_T Gpa1-469S Gpa1-82W	YJbo423
YLK3312	YLK3221	Mata met15Δ his3Δ1 leu2Δ0 ura3Δ0 nej1Δ::KanMX Gpa1-82W, Gpa1-469I	YJbo424
YLK3313	YLK3221	Mata met15Δ his3Δ1 leu2Δ0 ura3Δ0 nej1Δ::KanMX Gpa1-82W Gpa1-469I	YJbo425
YLK3314	YLK3306	Mata chrVII:113512_C chrVIII:113496_C Gpa1-469S [PLK127]	LY41
YLK3315	YLK3306	Mata chrVII:113512_C chrVIII:113496_C Gpa1-469S [PLK128]	LY49
YLK3316	YLK3308	Mata chrVII:113512_C chrVIII:113496_C chrVIII:114674_G chrVIII:114672_T Gpa1-469S Gpa1-82W [PLK127]	LY45
YLK3317	YLK3308	Mata chrVII:113512_C chrVIII:113496_C chrVIII:114674_G chrVIII:114672_T Gpa1-469S Gpa1-82W [PLK128]	LY53
YLK3318	YLK3221	Mata met15Δ his3Δ1 leu2Δ0 ura3Δ0 nej1Δ::KanMX Gpa1-82W, Gpa1-469S [PLK127]	LY47
YLK3319	YLK3221	Mata met15Δ his3Δ1 leu2Δ0 ura3Δ0 nej1Δ::KanMX Gpa1-82W, Gpa1-469S [PLK128]	LY55

## Sheet: Table S2. Plasmids
Table S2: Plasmids used in this study
ID	Insert	Source	Addgene	Comments
PLK124	MF2 p41 neo	Treusch et al. 2015	https://www.addgene.org/58564/	Flourescent magic marker plasmid with KanMX resistant cassette
PLK73	MF2 p41 nat	Treusch et al. 2015	https://www.addgene.org/58546/	Flourescent magic marker plasmid with NatMX resistant cassette
PLK77	p415 GalL-Cas9-Cyc1t	DiCarlo et al. 2013	https://www.addgene.org/43804/	Gal inducible CAS9 with LEU cassette
PLK88	SNR52p-gRNA(BstEII/SphI).CAN1.Y-SUP4t	DiCarlo et al. 2013	https://www.addgene.org/98814/	Guide RNA expression plasmid with URA resistance
PLK125	plk88 + GPA1 novel variant (from twist)	This study		guide RNA and coupled repair template to change 82W to 82R in Gpa1
PLK126	plk88 + GPA1 reversion (from twist)	This study		guide RNA and coupled repair template to change 82I to 82S in Gpa1
PLK127	HIS3 2um with ruby2	This study		ConLS-pTef1-mRuby2-tEno1-ConR1-His3-2micron-AmpR
PLK128	HIS3 2um with mTurquoise	This study		ConLS-pTef1-mTurquoise-tEno1-ConR1-His3-2micron-AmpR

## Sheet: Table S3. Primers
Table S3: Primers used in this study
Name	Sequence
GPA1_novelF	GCAGTATTCTCTTGCATGCAAAC
GPA1_novelR	CGGTGAGTCAGGTAAATCAACGG
GPA1_reversionF	GGCATTCCATCATAGACTCTAATGGAG
GPA1_reversionR	CGAACCTGCGCTACCGATAC

## Sheet: Table S4. Dataset Summary
Table S4: Summary information for the single-cell expression data generated in this study. For the ASE data, the number of transcripts per cell refers to the number of transcripts with transcribed variants.
cross	n_transcripts_per_cell	n_cells	median_umi_per_cell	median_expressed_snps_per_cell	n_duplicated	prop_duplicated	type	n_experiments	n_libraries	cross_name	parent1	parent2	effect_directions
A*	4995	7124	1514	1091			eQTL	1	2	393 BYxRM	BY	RM	-BY,+RM
A	5435	27744	4017	1093	1987	0.0716191	eQTL	1	2	A	BY	RM	-BY,+RM
B	5556	44784	2130	661	675	0.0150723	eQTL	2	4	B	YJM145	YPS163	-YJM145,+YPS163
C	4696	6595	1982	904	0	0	eQTL	1	2	C	CBS2888	YJM981	-CBS2888,+YJM981
B	3531	2864	2480	1543			ASE	1	1	B	YJM145	YPS163	-YJM145,+YPS163
C	4983	5219	6559	3284			ASE	1	1	C	CBS2888	YJM981	-CBS2888,+YJM981
A	2662	5890	1605	372			ASE	1	1	A	BY	RM	-BY,+RM
*previously genotyped segregant set

## Sheet: Table S5. Variance Decomp
Table S5: Variance explained by cell-cycle stage and the effect of segregant per transcript for the 393 previously generated segregants. The statistical significance of the segregant and cell-cycle stage effects for each transcript was estimated using a likelihood ratio test, and a corrected p-value is reported. Missing q-values indicate that the model did not converge for that gene.
Cell-cycle variance	Genetic variance	Cell-cycle q-value	Genetic q-value	total umis	gene id	gene name
0.0172052	0.802422	0.556066	1.65516e-05	172	YAL062W	GDH3
0.62699	0.531838	1.60494e-32	1.7516e-08	581	YAL061W	BDH2
0.0441158	0.123804	1.50147e-19	1.83122e-14	2942	YAL060W	BDH1
0.072647	1.2935e-07	0.00385149	1	302	YAL059W	ECM1
0.0166241	2.81325e-08	0.612171	1	207	YAL058W	CNE1
0.00379009	0.0278182			540	YAL056W	GPB2
0.0146508	0.0620954	0.421943	0.796872	300	YAL055W	PEX22
0.00725828	6.76185e-08	0.281988	1	795	YAL054C	ACS1
0.0370179	1.5104e-05			1110	YAL053W	FLC2
1.2275e-09	1.72062e-10	1	1	284	YAL051W	OAF1
0.0530846	0.119734	1.65554e-28	1.57103e-26	3439	YAL049C	AIM2
0.000167568	5.76075e-08			830	YAL046C	BOL3
0.00605991	0.00827361	0.15673	1	1356	YAL044W-A	BOL1
0.0263823	0.0162043	8.95054e-19	0.0564066	4558	YAL044C	GCV3
0.00328918	0.0827829	0.812946	0.497775	374	YAL043C	PTA1
0.0204342	0.0341291	1.47886e-08	0.0615038	1852	YAL042W	ERV46
8.90238e-09	4.78965e-10	1	1	622	YAL041W	CDC24
0.265322	0.0517356	1.90719e-24	0.237054	816	YAL040C	CLN3
0.0550121	0.0504662	1.38715e-09	0.161311	1043	YAL039C	CYC3
0.00382543	0.0226776	1.96821e-33	3.35257e-97	119392	YAL038W	CDC19
0.0174452	0.211711	0.365228	0.188627	230	YAL037W	YAL037W
0.0488381	0.0137665	1.01157e-07	0.779233	1238	YAL036C	RBG1
0.00752987	0.0197961	0.00639153	0.192073	2599	YAL035W	FUN12
0.34406	0.0295031	1.2394e-09	1	200	YAL034W-A	MTW1
0.0144402	0.0833201	0.186613	0.19354	569	YAL034C	FUN19
0.044001	7.99827e-08	0.00131064	1	563	YAL033W	POP5
0.0226759	6.06137e-06	0.0948498	1	326	YAL032C	PRP45
0.0588654	5.8401e-07	0.0261502	1	359	YAL031C	GIP4
0.013462	3.94848e-09	0.000113933	1	2662	YAL030W	SNC1
5.35896e-59	1.58441e-32		1	312	YAL029C	MYO4
0.0988455	0.00854382	0.000948478	1	313	YAL028W	FRT2
0.0318024	0.10003	0.183587	0.518999	272	YAL027W	SAW1
0.0177831	1.16199e-06		1	244	YAL026C	DRS2
0.112537	0.115318	2.06179e-07	0.0231555	595	YAL025C	MAK16
0.07952	0.0218619	9.61677e-60	0.00703224	4246	YAL023C	PMT2
0.0788597	5.96215e-06			371	YAL022C	FUN26
0.0183528	3.23119e-08	0.0139378	1	787	YAL021C	CCR4
1.7408e-40	0.0326834	1		337	YAL020C	ATS1
0.0500555	0.0607498	0.100922	0.726814	326	YAL019W	FUN30
0.0471798	0.0216407	0.0317393	1	319	YAL017W	PSK1
0.00573717	0.0194546		0.370613	1608	YAL016W	TPD3
0.0263428	0.000151296	0.135848	1	320	YAL015C	NTG1
0.0236692	0.0315908			1289	YAL014C	SYN8
0.0311793	1.48668e-05	0.00675727	1	559	YAL013W	DEP1
0.00604489	0.0157649	0.00180504	0.0616996	3875	YAL012W	CYS3
8.02259e-16	1.11656e-07	1	1	347	YAL011W	SWC3
0.0410751	0.0550682	0.333999	1	174	YAL010C	MDM10
1.25525e-45	0.163329			287	YAL009W	SPO7
0.0374401	0.0503841			1353	YAL008W	FUN14
0.102857	0.0162133	2.66921e-80	0.0144562	5454	YAL007C	ERP2
0.0610207	0.232093	1.30159e-56	1.89831e-108	13103	YAL005C	SSA1
0.00389375	0.00887728	2.49914e-13	1.81641e-09	28168	YAL003W	EFB1
2.46036e-71	0.122365			284	YAL002W	VPS8
0.0154047	8.24034e-07	0.417053	1	404	YAL001C	TFC3
0.00327876	0.0637417		0.125556	828	YAR002W	NUP60
0.0682491	0.017619	5.6922e-52	0.0161009	4970	YAR002C-A	ERP1
9.76861e-28	0.077641			673	YAR003W	SWD1
0.659467	0.0601723	1.3761e-54	0.321675	637	YAR007C	RFA1
0.698535	1.36315e-08	1.43667e-55	1	468	YAR008W	SEN34
0.00466533	0.00121261	0.519595	1	617	YAR014C	BUD14
0.0408253	0.0468069	1.29648e-18	0.00348334	2294	YAR015W	ADE1
1.87306	4.08716e-10	1.25836e-70	1	437	YAR018C	KIN3
7.74115e-46	0.258009			148	YAR019C	CDC15
0.00859088	0.247366	0.0768352	2.6474e-13	1051	YAR027W	UIP3
4.73899e-10	1.08643	1	1.25739e-06	185	YAR028W	YAR028W
4.18514e-09	0.571371	1	0.047457	134	YAR033W	MST28
0.194387	9.29945e-09	0.000509741	1	169	YAR035W	YAT1
0.0113376	0.102818	0.607896	0.836964	198	YAR042W	SWH1
0.00223567	0.0195642	0.653439	0.715438	1012	YBL107C	MIX23
0.0466651	3.65103e-08	0.135702	1	139	YBL106C	SRO77
0.00374211	0.147215			388	YBL105C	PKC1
1.87687e-34	0.131842			318	YBL104C	SEA4
7.54332e-30	2.23732e-18			219	YBL103C	RTG3
0.000234078	2.88531e-08	1	1	1767	YBL102W	SFT2
7.22886e-26	9.4848e-09	1	1	365	YBL101C	ECM21
0.0036359	0.0316606	2.62196e-05	6.14113e-15	9804	YBL099W	ATP1
0.0273511	0.0417387	0.00256508	0.515543	755	YBL095W	MRX3
0.00313157	0.0165204	0.593334	0.733514	1246	YBL093C	ROX3
0.00463359	0.0269792	2.0327e-14	4.45366e-35	28496	YBL092W	RPL32
0.0166391	3.16495e-05			669	YBL091C-A	SCS22
7.26164e-23	1.67176e-19			1607	YBL091C	MAP2
0.0145189	6.54752e-06			617	YBL090W	MRP21
4.06718e-27	4.57524e-06			507	YBL089W	AVT5
0.00171333	7.07784e-09	1	1	250	YBL088C	TEL1
0.0107192	0.0282204	5.16595e-20	3.49535e-18	13201	YBL087C	RPL23A
0.0610792	2.77803e-06	0.000400187	1	359	YBL085W	BOI1
0.0542489	0.020967			470	YBL082C	ALG3
0.0759129	1.14366e-14			307	YBL081W	YBL081W
0.147976	0.0651976	0.00114654	0.997916	168	YBL080C	PET112
1.87942e-14	9.1234e-10			403	YBL079W	NUP170
0.0612143	0.0339329	1.53554e-17	0.0614602	2190	YBL078C	ATG8
0.012883	4.86454e-08	0.00064906	1	2352	YBL076C	ILS1
0.0372069	5.1121e-08	0.138584	1	325	YBL075C	SSA3
0.00657471	0.0186024	2.20222e-15	2.56089e-16	19430	YBL072C	RPS8A
0.0409257	0.0488709	4.79389e-07	0.17462	1110	YBL071W-A	KTI11
0.000139133	9.59682e-07			230	YBL069W	AST1
0.0396874	0.00967559		1	862	YBL068W	PRS4
0.0577911	9.92302e-06	0.0111215	1	393	YBL067C	UBP13
0.00497431	0.22721	0.892921	0.418091	175	YBL066C	SEF1
0.072258	0.0651483	1.68559e-39	2.51725e-12	4401	YBL064C	PRX1
0.667483	0.124226	3.57194e-15	0.750551	137	YBL063W	KIP1
0.0245418	1.88839e-12			533	YBL061C	SKT5
0.0161407	0.0670277	0.642714	0.96988	190	YBL060W	YEL1
0.0145025	0.0949908	0.118534	0.133301	619	YBL059C-A	CMC2
0.0595596	1.62722e-07		1	1080	YBL058W	SHP1
0.0119842	0.0420866	0.0118371	0.230961	1131	YBL057C	PTH2
0.0118666	0.00104265		1	2669	YBL056W	PTC3
0.0175999	1.77519e-06			409	YBL055C	YBL055C
0.0376811	0.0418795	0.440165	1	137	YBL054W	TOD6
0.114779	6.01577e-06	1.1702e-07	1	398	YBL052C	SAS3
2.73841e-19	0.0800406	1		666	YBL051C	PIN4
0.0212964	9.66886e-18			2195	YBL050W	SEC17
0.481184	0.335865	6.17936e-15	0.0459767	197	YBL049W	MOH1
0.382228	0.168465	2.85236e-12	0.288839	213	YBL048W	RRT1
0.00834151	1.51535e-05	0.0865557	1	921	YBL047C	EDE1
0.0365156	0.172623		0.353193	205	YBL046W	PSY4
0.00757938	0.0911333	0.000532373	4.74184e-20	3579	YBL045C	COR1
0.139289	0.102476	0.00347657	0.600666	253	YBL043W	ECM13
0.217874	0.124105	1.1538e-14	0.285937	328	YBL042C	FUI1
0.0227407	0.0044367	2.17923e-08	0.841894	3690	YBL041W	PRE7
0.0225529	0.0448185	5.79189e-18	4.1666e-07	3575	YBL040C	ERD2
1.8581e-44	1.23681e-08			567	YBL039W-B	YBL039W-B
0.109217	0.0449353	9.21623e-20	0.0689602	1523	YBL039C	URA7
4.57313e-27	0.00210717			1001	YBL038W	MRPL16
0.0128985	0.264113		0.0374392	278	YBL037W	APL3
0.0484614	6.21091e-07	2.57023e-09	1	1416	YBL036C	YBL036C
0.814897	9.28665e-09			216	YBL035C	POL12
0.0738645	7.98603e-09			147	YBL034C	STU1
1.7527e-07	0.0259969			464	YBL033C	RIB1
0.168346	0.0351273	5.72618e-18	0.70259	574	YBL032W	HEK2
0.608179	0.048283		0.884494	255	YBL031W	SHE1
0.0123476	0.0617036	1.49148e-19	1.36031e-47	14603	YBL030C	PET9
0.0403739	0.0336187	4.30351e-05	0.161905	1531	YBL029C-A	YBL029C-A
0.0705648	0.15914	0.00636919	0.229552	309	YBL029W	YBL029W
0.0217416	0.0299459			603	YBL028C	YBL028C
0.00743346	0.0195437	7.5091e-18	4.07668e-15	16928	YBL027W	RPL19B
0.0342671	2.2676e-07	9.14397e-07	1	1153	YBL026W	LSM2
0.0587245	4.91972e-23			209	YBL025W	RRN10
0.0307121	0.0206092		0.764823	915	YBL024W	NCL1
0.48783	0.0997595	8.02349e-16	0.178059	479	YBL023C	MCM2
3.77341e-35	1.3911e-05			834	YBL022C	PIM1
5.74417e-25	0.0297206	1	1	415	YBL021C	HAP3
0.0271465	0.0461688		0.568441	550	YBL020W	RFT1
0.00732228	0.0392925	0.618393	1	301	YBL019W	APN2
0.0192231	0.0165171	0.0243	0.918441	875	YBL018C	POP8
0.00799569	0.0364303	0.15076	0.629997	739	YBL017C	PEP1
0.123164	0.197765	9.05338e-11	0.00710653	471	YBL016W	FUS3
0.0346439	0.225225	0.000692409	1.85702e-05	749	YBL015W	ACH1
1.64534e-21	0.216043			245	YBL014C	RRN6
0.00514218	4.09767e-09	0.521269	1	575	YBL011W	SCT1
0.0789155	1.04153e-08	0.00671944	1	338	YBL010C	YBL010C
0.711637	1.35836e-05	1.31437e-19	1	168	YBL009W	ALK2
0.0292965	4.88389e-12		1	282	YBL008W	HIR1
0.00715104	6.35619e-07	0.159435	1	895	YBL007C	SLA1
0.000715568	7.77048e-12	0.957162	1	1011	YBL006C	LDB7
0.0324834	7.86101e-09	0.372521	1	176	YBL004W	UTP20
1.61657	0.0115842	0	0.0419306	15034	YBL003C	HTA2
2.48161	0.0118528	0	0.133831	18558	YBL002W	HTB2
0.054363	0.0144366	1.85484e-35	0.17462	3502	YBL001C	ECM15
0.00578072	0.102007	0.498891	0.131297	535	YBR001C	NTH2
0.0142281	0.0523615	0.0103456	0.0839883	981	YBR002C	RER2
0.0434045	0.0554186	0.00989587	0.21951	772	YBR003W	COQ1
1.67045e-09	2.13939e-10	1	1	334	YBR004C	GPI18
0.0288721	3.46202e-05	0.0351345	1	479	YBR005W	RCR1
0.128153	0.108991	2.14717e-29	1.29195e-06	1670	YBR006W	UGA2
0.0382954	7.58819e-09	0.0472316	1	447	YBR007C	DSF2
0.0177622	0.0400744	0.0960346	0.755111	497	YBR008C	FLR1
1.5839	0.0132153	0	0.124136	18752	YBR009C	HHF1
1.01487	0.015927	0	0.00455921	20948	YBR010W	HHT1
0.00209079	0.00351025	1.08107e-07	0.0192146	23452	YBR011C	IPP1
0.0986813	0.527947	5.53397e-08	1.48513e-09	412	YBR012C	YBR012C
4.90948e-16	0.811846	1	1.38767e-11	308	YBR013C	YBR013C
0.0228319	0.0107132	4.83884e-05	0.871872	1383	YBR014C	GRX7
0.0731768	0.0205549	1.03203e-20	0.239608	2032	YBR015C	MNN2
0.0821006	0.031837	6.12571e-37	0.0157789	2761	YBR016W	YBR016W
2.75166e-11	8.07119e-07	1		764	YBR017C	KAP104
0.0195768	0.0551292	0.461771	0.935097	218	YBR021W	FUR4
0.00339007	3.52741e-08			765	YBR022W	POA1
0.0537569	0.123973	0.0234994	0.0799356	459	YBR023C	CHS3
0.00847663	1.83592e-05	0.475686	1	480	YBR024W	SCO2
0.00978503	0.00441243	2.97085e-08	0.679647	5145	YBR025C	OLA1
0.103525	0.136903	1.61055e-31	4.69306e-11	1694	YBR026C	ETR1
0.0579022	0.00493228			597	YBR028C	YPK3
0.00854596	4.87826e-09			2882	YBR029C	CDS1
2.39861e-61	1.0507e-42			618	YBR030W	RKM3
0.0213307	0.0195842	9.20361e-51	4.63195e-16	15278	YBR031W	RPL4A
6.75324e-13	0.265483	1	0.0644909	267	YBR033W	EDS1
0.0422422	0.0223945			989	YBR034C	HMT1
3.33667e-20	3.49698e-22	1		2273	YBR035C	PDX3
0.00573684	8.42694e-06	3.80983e-05		3829	YBR036C	CSG2
1.7604e-307	0.248592		0.0288576	305	YBR037C	SCO1
1.37609	0.114111	1.25629e-113	0.15404	475	YBR038W	CHS2
0.001216	0.0360341	0.183311	1.35466e-08	5398	YBR039W	ATP3
0.00941685	7.06699e-06	0.292511	1	763	YBR041W	FAT1
0.0637221	1.62231e-05	0.000901848	1	544	YBR042C	CST26
4.95674e-29	2.19666e-23			450	YBR043C	QDR3
0.0182204	0.051315	0.144362	0.790714	374	YBR044C	TCM62
0.16072	0.245876	2.89653e-09	0.0160066	342	YBR045C	GIP1
0.063613	0.0332981	1.41399e-07	0.676461	674	YBR046C	ZTA1
0.064619	2.55455e-08	0.0106058	1	229	YBR047W	FMP23
0.0117549	0.0305606	1.57742e-25	3.80395e-35	20358	YBR048W	RPS11B
0.113965	0.0823268	4.40688e-13	0.109213	623	YBR049C	REB1
0.0680753	0.0417227	2.39475e-17	0.00693482	2274	YBR052C	RFS1
0.0612315	0.0290253	1.90415e-19	0.0790569	2161	YBR053C	YBR053C
1.74362	0.199313	0	5.38239e-36	11969	YBR054W	YRO2
1.21511e-09	1.63384e-22	1	1	439	YBR055C	PRP6
0.0898234	0.0579058	1.68625e-22	0.00358801	1569	YBR056W	YBR056W
0.370973	0.226665	1.44968e-92	4.47981e-17	2393	YBR056W-A	YBR056W-A
1.35585e-09	6.09047e-09	1	1	402	YBR057C	MUM2
1.22031e-40	0.486765		5.89355e-08	369	YBR058C	UBP14
1.91924e-15	3.97877e-08			2579	YBR058C-A	TSC3
0.00934906	3.93922e-07	0.306571	1	602	YBR059C	AKL1
1.79146e-141	0.052381	1		361	YBR060C	ORC2
0.00965016	2.73927e-208			559	YBR061C	TRM7
2.3769e-05	0.0302642			612	YBR062C	YBR062C
5.87383e-21	0.313778	1	0.0517838	242	YBR063C	YBR063C
0.0889599	0.458959	3.89249e-05	6.14113e-15	728	YBR066C	NRG2
1.97963	0.466793	0	9.59448e-33	4594	YBR067C	TIP1
0.014794	0.894434	0.538174	3.46502e-06	211	YBR068C	BAP2
0.74847	0.11608	1.99209e-81	0.0160856	721	YBR070C	ALG14
0.898852	0.0186527	1.00201e-123	0.780364	1410	YBR071W	YBR071W
0.443845	1.39347	3.15461e-94	1.7287e-152	18534	YBR072W	HSP26
0.746449	0.0711534	3.16919e-60	0.37374	474	YBR073W	RDH54
0.00111924	0.040278	0.982989	0.675391	566	YBR074W	PFF1
0.109361	0.0649807	5.37836e-09	0.52782	447	YBR076C-A	YBR076C-A
0.0485876	1.35722e-06	1.85927e-05	1	613	YBR077C	SLM4
0.199367	0.0241119	0	4.35927e-17	21930	YBR078W	ECM33
0.026881	0.0168321		0.5087	1728	YBR079C	RPG1
0.00800025	6.34807e-23			900	YBR080C	SEC18
0.00468208	0.0911714	0.546674	0.142486	576	YBR081C	SPT7
0.0196675	0.0124713	8.4136e-17	0.0169506	6567	YBR082C	UBC4
0.564733	0.198884	2.76756e-46	1.1237e-08	1099	YBR083W	TEC1
0.00463051	0.094505		0.15896	500	YBR084W	MIS1
0.011094	0.0173952	7.56998e-24	1.15247e-11	14597	YBR084C-A	RPL19A
0.0352995	0.066328	3.97071e-54	1.08695e-27	15777	YBR085C-A	YBR085C-A
0.0578714	6.10353e-08	1.25196e-09	1	776	YBR086C	IST2
0.17498	0.101756	2.07549e-12	0.116632	579	YBR087W	RFC5
1.63364	0.0218706		0.469872	2258	YBR088C	POL30
0.0653959	0.00707059	7.94897e-75	0.281911	6825	YBR089C-A	NHP6B
0.0756701	0.242974	0.0371835	0.256116	185	YBR090C	YBR090C
0.0348645	1.38333e-05	0.00221621	1	520	YBR091C	TIM12
0.797482	0.560833	3.37561e-49	8.96159e-15	1079	YBR092C	PHO3
0.295459	0.665662	1.10939e-15	6.66811e-28	639	YBR093C	PHO5
0.0349402	0.0558286	0.0531633	0.83739	304	YBR094W	PBY1
0.0096502	0.0175452	0.261492		534	YBR095C	RXT2
8.53685e-17	0.0393858	1	0.252864	1248	YBR096W	YBR096W
0	1.3066e-35			189	YBR097W	VPS15
0.167236	1.74502e-05	0.00707087	1	159	YBR098W	MMS4
0.0338238	0.0487314	0.000282936	0.20236	921	YBR101C	FES1
0.0142028	4.8421e-10	0.264118	1	373	YBR102C	EXO84
0.104261	0.0059696	1.44266e-08		733	YBR103W	SIF2
0.000688852	0.0388958	0.996916		851	YBR104W	YMC2
0.0292138	0.207368	0.0235795	0.0172595	387	YBR105C	VID24
0.0188415	0.0231308	7.55229e-27	3.80141e-10	9270	YBR106W	PHO88
0.0878919	0.14351	0.0250546	0.515786	214	YBR107C	IML3
0.0100841	1.95252e-06			147	YBR108W	AIM3
0.00333566	0.0120788			6855	YBR109C	CMD1
0.0139311	0.0388082	0.00551239	0.104518	1466	YBR110W	ALG1
0.0202775	1.41678e-08	8.86239e-07	1	2101	YBR111C	YSA1
0.0267031	3.57639e-10	0.133989	1	366	YBR111W-A	SUS1
0.0194257	5.39127e-14			245	YBR112C	CYC8
9.30374e-09	0.0706639	1	0.742556	331	YBR114W	RAD16
0.0319833	0.0166131	0.0415179	1	586	YBR115C	LYS2
0.0031609	0.00646294	2.92505e-40	4.49379e-32	91179	YBR118W	TEF2
0.00250594	0.0573869	1	0.899352	257	YBR119W	MUD1
0.00415152	8.13983e-06	0.793618	1	387	YBR120C	CBP6
0.00272182	0.00812683	0.00446508	0.168593	7188	YBR121C	GRS1
0.00419618	0.0372936	0.176236	0.0793163	1741	YBR122C	MRPL36
0.182486	1.21251e-08	3.32608e-16	1	527	YBR123C	TFC1
0.01165	6.25164e-09			463	YBR125C	PTC4
0.0995936	0.0733022	2.15038e-47	9.98949e-14	4307	YBR126C	TPS1
0.0101779	0.0444055	0.0100998	0.0418911	1652	YBR126W-A	MEO1
0.012667	2.98862e-09	0.102447	1	886	YBR126W-B	YBR126W-B
0.00363794	0.0255925	5.13039e-07	7.07505e-15	10190	YBR127C	VMA2
0.00197156	0.00454438			832	YBR129C	OPY1
0.0267628	1.48852e-06	0.00258692	1	705	YBR130C	SHE3
0.00629161	0.0261245	0.967243	1	175	YBR131W	CCZ1
0.0427779	0.0898637	0.000144171	0.20236	456	YBR133C	HSL7
0.0315762	1.69468e-06			1058	YBR135W	CKS1
0.00959871	0.0249007	0.00585243	0.212523	1886	YBR137W	YBR137W
0.638197	0.128093	8.62673e-15	0.665235	144	YBR138C	YBR138C
0.183637	0.0394222	2.0933e-81	9.2222e-06	4038	YBR139W	YBR139W
0.000539221	0.220146	1	0.00211465	483	YBR140C	IRA1
0.0664338	0.301289	0.225466	0.287421	143	YBR141C	BMT2
0.0970483	0.103833	0.00182949	0.532236	258	YBR142W	MAK5
0.00653574	1.21401e-05			3403	YBR143C	SUP45
0.020545	0.0686582	0.0115987	0.0704504	1074	YBR145W	ADH5
0.0108544	0.0479255			1222	YBR146W	MRPS9
0.0614251	0.0408491	6.18593e-05	0.617478	667	YBR147W	RTC2
0.0245122	0.0423235	7.85268e-22	4.15798e-10	5960	YBR149W	ARA1
0.104293	3.23137e-16	0.00206128		285	YBR150C	TBS1
0.00367079	9.06504e-06	0.165223	1	2212	YBR151W	APD1
0.00614875	0.00535584	0.46836	1	569	YBR153W	RIB7
0.0229108	0.0173791	4.01944e-07	0.364451	2200	YBR154C	RPB5
0.0353169	0.03524	0.0399751	0.875199	407	YBR155W	CNS1
0.442015	0.0892372	2.00525e-10	0.794402	185	YBR156C	SLI15
0.340543	0.16307	8.79584e-14	0.313718	272	YBR157C	ICS2
1.33969	0.0618416	0	0.00830439	2192	YBR158W	AMN1
0.0155394	0.0232006	2.88423e-06	0.0917928	2282	YBR159W	IFA38
0.108946	0.0111052	9.33326e-18	0.868971	1226	YBR160W	CDC28
0.0211902	0.0275793	0.000597088	0.538529	1014	YBR161W	CSH1
0.143877	0.017493	0	8.36461e-14	18656	YBR162C	TOS1
0.066134	0.017479	1.59596e-24	0.481858	2050	YBR162W-A	YSY6
0.0291097	2.67814e-06			392	YBR163W	EXO5
0.0115299	0.00934233	0.000314741	0.884107	1534	YBR164C	ARL1
0.0127087	0.00929536			605	YBR165W	UBS1
2.93881e-79	1.70436e-11			597	YBR166C	TYR1
5.30523e-09	0.0669	1	0.605594	395	YBR167C	POP7
0.00037179	2.43092e-08	1		424	YBR168W	PEX32
0.102329	0.0664203	2.99964e-16	0.056776	1089	YBR169C	SSE2
0.0323878	1.2848e-08	0.00222845	1	711	YBR170C	NPL4
0.0236915	0.00968536	3.5193e-16	0.463045	3095	YBR171W	SEC66
0.0575965	0.0195023	7.07893e-10	0.780364	988	YBR172C	SMY2
0.00621111	0.0204889	0.0082341	0.101977	2596	YBR173C	UMP1
0.00561057	0.0213622	0.583243	1	482	YBR175W	SWD3
0.025262	2.78741e-07			468	YBR176W	ECM31
0.000581841	0.0678181	0.806583	8.70155e-08	2768	YBR177C	EHT1
8.35852e-09	1.39868e-08	1	1	271	YBR179C	FZO1
0.0101606	0.0376417	1.0325e-30	6.99579e-54	22158	YBR181C	RPS6B
0.0989006	6.4553e-06	5.20132e-07	1	395	YBR182C	SMP1
0.00698346	0.197005	0.51235	0.00158505	543	YBR183W	YPC1
0.00118074	0.0332592			506	YBR185C	MBA1
0.0545299	8.52014e-08	2.17097e-10	1	1542	YBR187W	GDT1
3.6967e-08	4.35376e-05			426	YBR188C	NTC20
0.0105035	0.0185968	3.59263e-29	5.11021e-17	20160	YBR189W	RPS9B
0.0100185	0.0235846	3.7733e-29	4.27723e-32	25420	YBR191W	RPL21A
1.55768e-47	1.62379e-07	1		476	YBR192W	RIM2
0.00986886	0.0758621	0.541405	0.636426	316	YBR193C	MED8
0.00572094	4.708e-07	0.791061	1	330	YBR194W	AIM4
0.0222191	0.112629	0.0562898	0.064061	540	YBR195C	MSI1
0.00248195	0.0307659	1.34988e-05	3.03319e-23	13876	YBR196C	PGI1
0.000826723	0.618006			228	YBR197C	YBR197C
0.00434547	0.0824344	0.595182	0.18331	589	YBR198C	TAF5
0.0285978	0.0160436			2932	YBR199W	KTR4
0.454162	0.0141918	2.85519e-19	1	501	YBR200W	BEM1
0.0388079	0.0457118	5.76964e-11	0.0207065	1620	YBR201W	DER1
0.202314	6.46121e-07	0.00230548	1	257	YBR201C-A	YBR201C-A
0.819517	0.0581429	5.2548e-24	0.502146	555	YBR202W	MCM7
0.135641	4.57901e-09	0.00752961	1	218	YBR203W	COS111
3.43017e-59	0.0631253			645	YBR204C	LDH1
4.0265e-09	0.0053619			1178	YBR205W	KTR3
0.0294096	0.0680206	0.0109986	0.343036	541	YBR206W	YBR206W
0.0192906	0.0380081	7.3278e-07	0.0614602	1868	YBR207W	FTH1
0.0612196	0.0748993	0.0124566	0.692456	291	YBR208C	DUR1,2
0.00667514	7.2148e-06	0.273064	1	879	YBR210W	ERV15
8.07694e-16	0.134817	1	0.753896	209	YBR211C	AME1
0.0561506	8.6545e-05			568	YBR212W	NGR1
0.0459857	0.0513968	0.022745	0.841894	305	YBR213W	MET8
0.0167173	0.0802781	0.00914844	0.00466124	1046	YBR214W	SDS24
2.52281e-18	0.139908			308	YBR215W	HPC2
0.00438226	3.76536e-07		1	364	YBR216C	YBP1
1.04661e-09	2.85446e-13	1	1	430	YBR217W	ATG12
0.0117229	1.15871e-05			219	YBR218C	PYC2
0.00157342	0.0392357	0.959637	0.728233	529	YBR220C	YBR220C
0.00669463	0.00736556	4.21859e-07	0.227237	6698	YBR221C	PDB1
0.0101345	3.52973e-08			1402	YBR222C	PCS60
0.0366483	2.38322e-06			180	YBR223C	TDP1
2.48059e-15	3.65132e-14			412	YBR227C	MCX1
1.16042e-07	1.39588e-08			518	YBR228W	SLX1
0.0127071	7.33602e-07		1	702	YBR229C	ROT2
0.0542337	0.0728407	5.61632e-27	5.36475e-12	4089	YBR230C	OM14
0.0456387	0.0325788	6.49698e-10	0.187317	1702	YBR230W-A	YBR230W-A
2.62548e-62	3.47216e-13			402	YBR231C	SWC5
0.0207231	0.121127	0.0272128	0.0311637	602	YBR233W	PBP2
0.245763	1.20845e-08	7.41875e-22	1	452	YBR233W-A	DAD3
0.0025391	2.2375e-08			2925	YBR234C	ARC40
0.0103397	0.00941281		1	393	YBR235W	VHC1
0.0133696	0.00560018			775	YBR236C	ABD1
0.0642758	1.67632e-06			356	YBR237W	PRP5
0.0127761	2.223e-17			166	YBR239C	ERT1
0.0152292	0.553023	0.656534	0.0113474	183	YBR240C	THI2
0.0884937	0.0487245	6.80314e-11	0.420508	695	YBR241C	YBR241C
0.0640499	0.019577	6.79663e-08	0.933409	692	YBR242W	YBR242W
0.26653	0.0318033			812	YBR243C	ALG7
0.09984	0.102129	4.60803e-05	0.334967	492	YBR244W	GPX2
0.0351093	0.0360534		0.502519	702	YBR245C	ISW1
0.0268547	1.03091e-08	0.0104097	1	611	YBR246W	RRT2
0.0643413	1.62785e-09	4.44535e-05		652	YBR247C	ENP1
0.0182237	0.00953672	7.82803e-05	0.823296	1786	YBR248C	HIS7
0.00682597	0.015	0.000452991	0.231238	3055	YBR249C	ARO4
1.93745e-09	2.73513e-12	1	1	369	YBR251W	MRPS5
0.193347	0.0219241	1.73761e-41	0.504074	1447	YBR252W	DUT1
1.13653e-09	2.62825e-11	1	1	383	YBR253W	SRB6
0.0348825	0.038195	0.00124677	0.674621	572	YBR254C	TRS20
1.86472e-69	4.25677e-12	1		363	YBR255W	MTC4
0.0103183	1.54484e-05			974	YBR255C-A	RCF3
2.21071e-07	0.0284539	1	0.0284149	2319	YBR256C	RIB5
2.5183e-08	5.9751e-08	1	1	282	YBR257W	POP4
9.11279e-10	2.20611e-09	1	1	215	YBR259W	YBR259W
0.00194621	0.00458234			545	YBR260C	RGD1
0.0147436	0.0706098			619	YBR261C	TAE1
8.56985e-10	0.0413479	1	0.240471	1050	YBR262C	MIC12
2.17384e-07	0.00713659			1233	YBR263W	SHM1
0.00648041	0.00984024	0.413885	1	550	YBR264C	YPT10
0.0188118	6.43395e-09			777	YBR265W	TSC10
0.0389487	0.0211218	0.00608338	1	541	YBR267W	REI1
0.00158131	1.99173e-07			1294	YBR268W	MRPL37
0.00814719	0.0188214	0.0362831	0.69821	1288	YBR269C	SDH8
0.0156705	0.0718879		0.878308	223	YBR270C	BIT2
0.0840294	9.55085e-26			305	YBR271W	EFM2
1.09347e-13	0.013011	1		623	YBR272C	HSM3
0.0423659	9.97868e-09	0.00251102	1	531	YBR273C	UBX7
3.19778e-09	2.37982e-21	1	1	350	YBR274W	CHK1
0.131835	8.34257e-112			535	YBR276C	PPS1
0.102155	6.39019e-07	0.000132689	1	342	YBR278W	DPB3
0.0268819	0.0490734			717	YBR279W	PAF1
0.0506201	1.64955e-05	0.0248695		259	YBR280C	SAF1
0.0368198	0.220874		0.0416101	285	YBR281C	DUG2
3.49762e-09	6.5637e-11	1	1	697	YBR282W	MRPL27
0.00538531	0.00773871	0.00242642	0.498001	3484	YBR283C	SSH1
0.0474431	0.0296323	1.86541e-09	0.351834	1342	YBR286W	APE3
0.0102014	0.0139015	0.000924028	0.271628	3431	YBR287W	YBR287W
3.6957e-15	4.4153e-10			845	YBR288C	APM3
0.154857	7.74415e-09	2.51259e-05	1	200	YBR289W	SNF5
1.59951e-29	0.00649664			640	YBR290W	BSD2
0.0326691	3.45976e-07			1049	YBR291C	CTP1
1.36678e-09	1.28625e-08	1	1	316	YBR293W	VBA2
0.391698	0.429047	3.40798e-19	3.34307e-05	434	YBR294W	SUL1
0.228827	0.00915241	9.60007e-05	1	188	YBR295W	PCA1
1.8665e-09	0.276744	1	0.108045	199	YBR297W	MAL33
0.0491803	0.134619	0.0397006	0.445827	275	YBR298C	MAL31
5.52225e-10	1.81116	1	6.65246e-18	213	YBR302C	COS2
0.741079	4.98824e-08	1.33987e-29	1	249	YCL061C	MRC1
0.0771718	6.85334e-06	4.73226e-08	1	876	YCL059C	KRR1
0.000913564	0.0209652	0.641177	0.0848114	2712	YCL057C-A	MIC10
0.0444488	0.136345	5.58559e-05	0.00203077	671	YCL056C	PEX34
0.521699	0.0930406	6.74309e-103	0.000786023	1904	YCL054W-A	RDT1
7.8808e-18	9.49076e-16			896	YCL052C	PBN1
0.00423714	2.56555e-06	0.71377	1	396	YCL051W	LRE1
0.0078768	0.0166537	0.000889527	0.250258	2584	YCL050C	APA1
0.0158611	0.0450466	0.365228	0.859188	369	YCL049C	YCL049C
4.3469	1.32683	6.76951e-26	1.20504e-05	272	YCL048W-A	YCL048W-A
3.4402e-50	0.0361193			652	YCL047C	POF1
0.00400321	0.019618	0.320125	0.613394	1186	YCL045C	EMC1
0.0657758	0.102077	0.000613024	0.282114	402	YCL044C	MGR1
0.0601553	0.047961	1.42242e-116	1.29866e-36	20400	YCL043C	PDI1
0.00741274	0.0713386	0.819894	1	181	YCL039W	GID7
0.0921467	4.80123e-05	0.000906987		566	YCL038C	ATG22
1.74259e-12	6.94919e-09			415	YCL037C	SRO9
0.0978978	0.12954	0.00618029	0.779233	157	YCL036W	GFD2
0.00486197	0.0222449	0.000998734	0.000741524	5199	YCL035C	GRX1
0.045463	7.60146e-06			805	YCL034W	LSB5
0.0250281	4.10012e-05	0.0015878	1	844	YCL033C	MXR2
0.0265436	2.10568e-07			431	YCL032W	STE50
0.0219645	0.00363771		1	1402	YCL031C	RRP7
0.00429759	0.0289949	0.00336347	0.000217541	4193	YCL030C	HIS4
0.00702385	0.0304732	0.807088	1	192	YCL029C	BIK1
0.523969	0.536414	7.53734e-15	4.35153e-06	242	YCL027W	FUS1
0.0130971	0.299117	4.98972e-07	5.18033e-77	3846	YCL026C-B	HBN1
0.0192209	0.071759	0.403654	0.893865	226	YCL025C	AGP1
1.82241	0.16448	2.76165e-46	0.313718	212	YCL024W	KCC4
0.0453871	0.260617	0.263794	0.399649	151	YCL021W-A	YCL021W-A
8.15331e-10	0.0496723	1	2.34694e-12	5675	YCL018W	LEU2
0.0151951	0.0236635	0.00461529		1431	YCL017C	NFS1
0.0327457	0.0415761	0.0681717	1	231	YCL016C	DCC1
0.479275	1.79039e-05	7.36511e-22	1	269	YCL014W	BUD3
0.0203598	0.0478154	0.00105753	0.140152	1322	YCL012C	YCL012C
2.97673e-18	5.60169e-14			1591	YCL011C	GBP2
0.00443737	0.0109519	0.000216628	0.0187542	7132	YCL009C	ILV6
0.0292313	0.049786		0.305799	492	YCL008C	STP22
0.00875039	0.215729	0.641068	0.162535	250	YCL005W-A	VMA9
0.0343113	2.76724e-15		1	525	YCL005W	LDB16
0.0238276	8.45019e-06	0.020956	1	658	YCL002C	YCL002C
0.0708912	0.024059	5.70805e-25	0.169326	1728	YCR002C	CDC10
0.0432056	0.0446831	5.66811e-10	2.22454e-05	3073	YCR004C	YCP4
0.0179486	0.0482395	1.08223e-12	4.78052e-13	9401	YCR005C	CIT2
2.70968e-08	0.000649248	1	1	174	YCR007C	YCR007C
0.00853508	1.15862e-08			463	YCR008W	SAT4
0.0307753	0.0236601	4.90698e-15	0.0205097	3223	YCR009C	RVS161
0.00612227	0.0800747	0.375265	0.0502947	818	YCR011C	ADP1
0.0287022	6.71829e-10	0.480923	1	156	YCR013C	YCR013C
2.03592e-56	1.2709e-23			197	YCR014C	POL4
7.48967e-12	2.85016e-06	1	1	173	YCR015C	CTO1
4.30222e-10	8.18489e-17	1	0.824467	1225	YCR017C	CWH43
0.00961289	0.284304	0.290655	0.000383114	567	YCR018C	SRD1
3.87509e-93	2.12771e-60			400	YCR019W	MAK32
0.0235348	0.10844	0.0101194	0.0534137	998	YCR020C	PET18
0.00794919	0.0328067	0.368925	0.813374	588	YCR020C-A	MAK31
0.729347	0.712694	5.35225e-26	1.00693e-08	820	YCR021C	HSP30
0.016265	0.0141345	0.055379		669	YCR023C	YCR023C
0.000557843	3.01248e-06	1	1	357	YCR024C	SLM5
0.26048	0.0279143	0	2.82955e-36	77364	YCR024C-B	YCR024C-B
0.273994	0.0619319	3.36365e-111	2.85346e-07	3160	YCR024C-A	PMP1
1.17397e-59	1.18038e-06		1	501	YCR026C	NPP1
9.67829e-23	2.67136e-11			384	YCR027C	RHB1
0.018214	0.0231189	0.0649744	0.977762	472	YCR028C	FEN2
0.00427538	9.35456e-07			4401	YCR028C-A	RIM1
0.0187462	1.28955e-08	0.133414	1	668	YCR030C	SYP1
0.00934916	0.02752	6.73793e-23	9.96906e-33	20696	YCR031C	RPS14A
0.0110754	0.0460921	0.580264	1	259	YCR032W	BPH1
0.0308903	0.0322032	0.00113835	0.667494	695	YCR033W	SNT1
0.0130539	0.0204408	0.0188831	0.760415	892	YCR035C	RRP43
1.28991e-14	1.17596e-06			547	YCR037C	PHO87
0.154377	0.0181395	5.45203e-06	1	393	YCR042C	TAF2
0.0317909	0.00733912	6.07051e-14	0.833393	2312	YCR043C	YCR043C
9.54774e-33	7.09535e-10			832	YCR044C	PER1
2.79831e-81	0.00360672	1	1	1222	YCR046C	IMG1
0.0177058	0.0360403	0.164575	0.755111	564	YCR047C	BUD23
0.0352116	0.040112	0.123799	1	226	YCR048W	ARE1
0.0291983	0.0723129			176	YCR054C	CTR86
0.0227493	0.000606821	0.0252902	1	527	YCR057C	PWP2
2.85999e-09	1.63846e-07	1	1	479	YCR059C	YIH1
0.0101379	1.89264e-05			664	YCR060W	TAH1
0.544972	0.105781	4.31292e-28	0.324349	344	YCR065W	HCM1
2.18165e-37	0.052911	1	0.782912	372	YCR067C	SED4
0.00513005	0.0669518	0.676159	0.612117	428	YCR071C	IMG2
0.137641	0.148561		0.112103	346	YCR072C	RSA4
0.101041	1.13111e-07	2.22075e-06	1	358	YCR075C	ERS1
0.00162363	0.0902705	0.947645	0.322928	475	YCR076C	FUB1
0.0101849	0.0408303	0.168184		730	YCR077C	PAT1
0.0788824	0.0037691	5.36622e-09	1	593	YCR083W	TRX3
0.102695	0.175861	6.93205e-14	5.77847e-06	834	YCR084C	TUP1
0.272346	0.244304	1.28432e-06	0.240471	165	YCR087W	YCR087W
0.0942086	7.25617e-07	0.000229851	1	388	YCR087C-A	YCR087C-A
0.0273186	5.80489e-06	5.27807e-05	1	898	YCR090C	YCR090C
2.97024e-33	2.37728e-30			214	YCR092C	MSH3
0.00415058	0.0783162	0.661208	0.374702	499	YCR093W	CDC39
0.113488	4.23647e-08	0.00715179		411	YCR095C	OCA4
0.0298662	0.033595	8.86853e-05	0.591259	879	YCR097W	HMRA1
0.200878	0.736739	2.39159e-14	7.21353e-14	904	YCR098C	GIT1
5.14534e-29	6.28213e-08	1	1	149	YCR105W	ADH7
0.00254453	0.318914	0.99365	0.0328138	219	YCR106W	RDS1
0.00325096	0.453451			163	YCR107W	AAD3
0.00341089	0.9417	0.742735	4.88572e-52	1097	YDL243C	AAD4
0.0661226	1.56752e-05	1.14239e-05	1	367	YDL240W	LRG1
0.018254	0.0149132	0.354119	1	231	YDL239C	ADY3
1.81703e-62	0.00308827	1	1	173	YDL238C	GUD1
0.0253749	0.01405			1992	YDL237W	AIM6
0.0144019	0.0244855	1.98316e-05	0.0119435	3382	YDL236W	PHO13
0.00412148	0.0499164	0.181636	0.00481243	1783	YDL235C	YPD1
9.96975e-20	0.0447032			540	YDL234C	GYP7
0.0144673	4.63158e-06			3689	YDL232W	OST4
0.0118105	0.108518			620	YDL231C	BRE4
5.55404e-21	0.0309778	1	1	254	YDL230W	PTP1
0.0276017	0.0255235	2.12167e-66	4.20541e-22	16805	YDL229W	SSB1
3.18662	1.03681	1.25715e-57	3.6476e-05	420	YDL227C	HO
0.00568987	7.9929e-07			1368	YDL226C	GCS1
2.24454e-09	1.21051e-08			615	YDL225W	SHS1
0.00959618	7.8049e-09	0.216934	1	1015	YDL224C	WHI4
0.542652	0.298254	6.16251e-22	0.00211465	445	YDL222C	FMP45
0.0609141	9.27345e-08	2.80641e-05	1	822	YDL219W	DTD1
0.00616869	3.22586e-05			612	YDL217C	TIM22
0.0153866	1.89612e-07			484	YDL215C	GDH2
0.00719008	0.0564734	0.807665	0.972217	261	YDL213C	NOP6
0.000432326	9.64351e-07			3585	YDL212W	SHR3
0.292133	0.0405341	6.85691e-11	0.973014	272	YDL211C	YDL211C
0.0378615	1.01039	0.251312	8.48008e-09	252	YDL210W	UGA4
0.0798793	0.00565051		1	438	YDL209C	CWC2
0.0110902	0.0306732	0.00151249	0.0744672	2275	YDL208W	NHP2
0.00644328	1.34692e-07	0.266055	1	1068	YDL207W	GLE1
0.0579745	3.56586e-06			430	YDL206W	YDL206W
4.73468e-09	0.155853	1	0.518607	223	YDL205C	HEM3
0.241639	0.277517	2.17736e-25	1.39821e-08	1032	YDL204W	RTN2
0.00466462	9.07269e-07	0.750229		476	YDL203C	ACK1
1.02555e-61	0.068063			478	YDL202W	MRPL11
0.0535752	0.0953064	0.000123375	0.0227732	738	YDL201W	TRM8
0.0174722	5.13107e-07	0.0581866	1	750	YDL200C	MGT1
5.32752e-08	0.0627567			194	YDL199C	YDL199C
0.00688524	0.0317541	0.0145489	0.0101203	2598	YDL198C	GGC1
0.20872	3.06956e-06	1.56716e-09	1	329	YDL197C	ASF2
0.0282739	0.0124817			1018	YDL195W	SEC31
0.0133566	0.0607738	0.0038433	0.021307	1281	YDL193W	NUS1
0.0322058	0.0128994	1.0512e-70	1.03442e-06	12846	YDL192W	ARF1
0.0044359	0.0262677	3.26048e-07	6.11741e-15	12518	YDL191W	RPL35A
2.84831e-44	2.02823e-08	1	1	448	YDL190C	UFD2
2.48025e-164	9.81485e-104			540	YDL189W	RBS1
0.0201776	1.54381e-19			1307	YDL188C	PPH22
0.00516061	0.0212665	0.000158731	0.000903034	5248	YDL185W	VMA1
0.00438368	0.0316847	3.49419e-12	1.63729e-29	22582	YDL184C	RPL41A
0.0175803	0.0718645	0.37941	0.933409	232	YDL183C	YDL183C
0.0732694	0.0552399	1.1823e-30	5.25198e-09	5100	YDL182W	LYS20
0.00388947	0.0591552	0.172092	1.20813e-05	2842	YDL181W	INH1
0.00888579	0.0165738			604	YDL180W	YDL180W
1.90727	0.0743848	2.59848e-240	0.241647	1029	YDL179W	PCL9
9.54927e-19	0.045166	1		1099	YDL178W	DLD2
0.0178809	1.916e-08			521	YDL177C	YDL177C
9.5097e-10	7.32365e-08			223	YDL176W	YDL176W
0.0519972	3.88849e-05		1	327	YDL175C	AIR2
0.00447657	0.0338703	0.236845	0.162526	1725	YDL174C	DLD1
0.0104846	2.28532e-07			1363	YDL173W	PAR32
0.0292815	0.109829	2.29357e-06	6.34115e-07	1616	YDL171C	GLT1
1.69323e-09	0.0701107	1	0.374314	562	YDL170W	UGA3
0.172879	5.67356e-06	4.63883e-08	1	336	YDL169C	UGX2
0.0463235	0.427702	6.20122e-23	4.32435e-148	4280	YDL168W	SFA1
0.0647999	0.0464145	5.17559e-05	0.605217	549	YDL167C	NRP1
0.00796595	0.00890564	0.0828081	1	969	YDL166C	FAP7
3.35657e-10	0.0221623	1	0.660656	1045	YDL165W	CDC36
0.51644	1.52261e-07	2.26075e-23	1	254	YDL164C	CDC9
0.045047	0.0373579	0.00397297	0.669598	546	YDL161W	ENT1
0.022384	1.7278e-05	0.00644336	1	707	YDL160C-A	MHF2
0.0859477	0.225676	0.000652971	0.0413382	254	YDL160C	DHH1
5.82397e-08	1.1175e-06	1	1	339	YDL159W	STE7
0.16211	0.0358835	2.11599e-42	0.0536599	1748	YDL157C	YDL157C
0.166717	0.0667924	4.23209e-13	0.454698	439	YDL155W	CLB3
1.47489e-92	0.385663			139	YDL154W	MSH5
0.108761	0.0137773	3.26048e-07	1	531	YDL153C	SAS10
0.090768	0.00021476	4.43718e-06	1	624	YDL150W	RPC53
0.0219781	9.07839e-09	0.2564	1	240	YDL149W	ATG9
0.0855986	4.21907e-08	0.00100904	1	296	YDL148C	NOP14
0.0131418	1.01114e-12	5.86184e-05	1	3210	YDL147W	RPN5
0.00463029	0.15194	0.742625	0.144954	398	YDL146W	LDB17
0.026628	4.46777e-07			1262	YDL145C	COP1
0.0137081	0.00675532	0.154432	1	686	YDL144C	YDL144C
0.00777622	0.0164675	0.00501953	0.275636	2386	YDL143W	CCT4
1.24257e-20	7.64844e-07			657	YDL142C	CRD1
3.48221e-08	1.25527e-05			521	YDL141W	BPL1
0.0116645	1.66424e-10			1043	YDL140C	RPO21
0.422836	0.0180112	2.45233e-15	1	463	YDL138W	RGT2
0.0391621	0.0195151	7.50996e-80	8.09231e-11	12926	YDL137W	ARF2
0.00558825	0.0203856	8.44466e-06	0.000741606	5757	YDL136W	RPL35B
0.0640172	3.63719e-06	5.39771e-13	1	1645	YDL135C	RDI1
0.0149688	2.65852e-56			1653	YDL134C	PPH21
0.00710024	0.0363894	1.90638e-09	3.08168e-11	9336	YDL133C-A	RPL41B
0.00316433	3.08187e-52			650	YDL133W	SRF1
2.12503e-68	0.445988	1	3.57952e-14	583	YDL132W	CDC53
0.0198185	0.0243172	6.20122e-23	1.64733e-08	10358	YDL131W	LYS21
0.0476284	0.0227768	2.30311e-18	0.143901	2621	YDL130W-A	STF1
0.0058295	0.0239614	2.89879e-13	2.67944e-24	19640	YDL130W	RPP1B
0.154799	0.0277982	7.2899e-73	0.00757414	3186	YDL128W	VCX1
0.275789	0.0894685	3.86307e-29	0.145398	714	YDL127W	PCL2
0.0192492	0.00643334	4.27356e-21	0.313718	6655	YDL126C	CDC48
0.0376839	0.121742	2.15526e-37	3.259e-54	7032	YDL125C	HNT1
0.0231313	0.537119	1.21169e-15	0	11773	YDL124W	YDL124W
0.0293484	0.0702052	0.00101147	0.144496	760	YDL123W	SNA4
0.0186017	9.41257e-08	0.130573	1	674	YDL122W	UBP1
0.0256335	0.0158486	7.84177e-06	0.806224	1112	YDL121C	YDL121C
0.00316982	0.0622287	0.405848	0.0177218	1221	YDL120W	YFH1
0.172677	0.0876181	3.43753e-08	0.564658	307	YDL119C	HEM25
0.515174	0.0468555	2.85e-40	0.883321	382	YDL117W	CYK3
0.00165109	0.0236788	0.938745	0.83304	680	YDL116W	NUP84
1.13878e-11	1.53472e-10			831	YDL115C	IWR1
1.83804e-105	0.197352			350	YDL113C	ATG20
0.00515125	0.152729	0.876836	0.526292	221	YDL112W	TRM3
0.0103771	0.0603623	0.152881	0.113621	897	YDL111C	RRP42
0.0434177	0.0187642	1.996e-10	0.148728	3164	YDL110C	TMA17
0.00733632	0.0612675		0.551761	440	YDL108W	KIN28
4.54098e-09	2.43321e-06	1	1	372	YDL107W	MSS2
1.25452e-35	0.0214958			481	YDL106C	PHO2
0.619419	0.075351	1.56441e-11	1	136	YDL105W	NSE4
2.0805e-165	0.0155216			306	YDL104C	QRI7
0.0832244	3.31691e-05		1	934	YDL103C	QRI1
0.0702225	1.43297e-07			185	YDL102W	POL3
0.726923	9.42769e-06			403	YDL101C	DUN1
0.00602191	0.0205431	0.000991779	0.00310707	4595	YDL100C	GET3
5.52608e-06	0.0600029	1	0.410695	609	YDL099W	BUG1
0.0203281	0.257674			201	YDL098C	SNU23
0.00946709	5.8141e-09	0.000552241	1	2175	YDL097C	RPN6
0.0458537	0.0282866	6.08301e-30	0.00337761	3630	YDL095W	PMT1
0.230817	0.048648	1.60906e-19	0.465468	640	YDL093W	PMT5
0.00820358	8.96451e-10	0.115214	1	890	YDL092W	SRP14
0.00167795	0.0812856		0.341791	446	YDL091C	UBX3
0.0926802	3.22907e-06			347	YDL090C	RAM1
0.0219996	0.123688			531	YDL089W	NUR1
5.11761e-10	2.47803e-09			616	YDL088C	ASM4
0.0340394	0.0685342	2.14235e-07	0.00125025	1629	YDL086W	YDL086W
0.0324478	1.31704e-08	7.22391e-06	1	850	YDL085C-A	YDL085C-A
0.269519	0.280723	0.00288937	0.211632	142	YDL085W	NDE2
0.0264326	0.0236448	3.57445e-33	1.29236e-06	6968	YDL084W	SUB2
0.012006	0.0278066	1.30153e-29	1.30419e-30	21066	YDL083C	RPS16B
0.0146422	0.0206135	4.48858e-28	1.16494e-13	13343	YDL082W	RPL13A
0.00657687	0.0207227	3.66035e-14	7.06378e-13	14889	YDL081C	RPP1A
0.00411754	1.53737e-07	0.663607	1	574	YDL080C	THI3
0.0346543	0.0425565	7.82015e-17	0.000242996	2754	YDL078C	MDH3
0.0031936	2.53579e-08	0.947287	1	297	YDL077C	VAM6
0.00514299	1.40142e-07			769	YDL076C	RXT3
0.00615459	0.019387	2.21582e-05	0.00651851	4950	YDL075W	RPL31A
0.00807082	0.0289092	0.147786	0.558433	934	YDL074C	BRE1
0.0082288	2.10478e-05			288	YDL073W	AHK1
0.0191506	0.0159433	5.97528e-12	0.0451484	4794	YDL072C	YET3
0.0912893	0.048853	1.2297e-25	0.0301599	1639	YDL070W	BDF2
1.61858e-09	0.175325	1	0.200264	289	YDL069C	CBS1
0.00205262	0.0178058	0.0032291	9.85364e-06	9554	YDL067C	COX9
0.00788903	0.0364809	0.00275173	0.000124898	3907	YDL066W	IDP1
3.46067e-09	4.3568e-08	1	1	350	YDL065C	PEX19
0.0438322	0.0185981	1.44218e-14	0.463727	1771	YDL064W	UBC9
0.11131	8.8649e-06	0.000142619	1	290	YDL063C	SYO1
0.00500799	0.0220671	1.9141e-13	7.80838e-24	23298	YDL061C	RPS29B
0.0206953	2.60195e-06	0.160546	1	375	YDL060W	TSR1
0.0108379	0.0702072	0.370492	0.404453	518	YDL059C	RAD59
1.16295e-198	0.0704366	1	0.591251	418	YDL058W	USO1
1.10676e-19	0.103038			257	YDL057W	YDL057W
0.0478239	0.169853	0.0311099	0.20236	249	YDL056W	MBP1
0.261524	0.0272137	0	3.43928e-14	37823	YDL055C	PSA1
0.0207033	0.000158402			480	YDL054C	MCH1
6.05e-08	1.915e-14	1	1	1678	YDL053C	PBP4
0.0404096	9.38252e-08	1.86084e-13	1	1973	YDL052C	SLC1
0.0110278	0.0192802	0.00278335	0.515786	1719	YDL051W	LHP1
0.0315775	0.00323697	0.0058773	1	543	YDL049C	KNH1
0.0232479	0.126009	0.103278	0.0655719	600	YDL048C	STP4
0.0337097	0.129697	0.0126421	0.194005	378	YDL047W	SIT4
0.00923294	0.0457239	1.03844e-05	5.92461e-07	3422	YDL046W	NPC2
0.0015933	5.43074e-11	0.924663	1	534	YDL045W-A	MRP10
0.0120766	1.17327e-05		1	711	YDL045C	FAD1
0.0210745	8.76737e-07			279	YDL044C	MTF2
0.0125097	0.0500813		0.78017	408	YDL043C	PRP11
0.0163922	0.0685486	0.487933	0.651204	349	YDL042C	SIR2
4.86294e-40	1.66064e-22		1	795	YDL040C	NAT1
0.120361	0.175878	0.0180894	0.481623	183	YDL039C	PRM7
4.78124e-09	0.0892595	1	0.802327	218	YDL036C	PUS9
0.00726133	4.76356e-09	0.614348	1	493	YDL035C	GPR1
0.0597252	3.44917e-06	0.00476608	1	380	YDL031W	DBP10
1.72974e-06	0.155868	1	0.482185	226	YDL030W	PRP9
0.00567484	1.02736e-05			3974	YDL029W	ARP2
0.174737	1.43119e-15			224	YDL028C	MPS1
1.53946e-08	4.31934e-10			1363	YDL027C	MRX9
0.0462934	0.171016	0.00361638	0.0650274	344	YDL025C	RTK1
0.0695402	0.0384395	5.72324e-35	2.70496e-07	7889	YDL022W	GPD1
8.52186e-09	0.0855696	1	0.0701852	800	YDL021W	GPM2
0.0286016	0.0678584	0.000463185	0.0370334	986	YDL020C	RPN4
0.0102305	0.0595602	0.150591	0.166765	796	YDL019C	OSH2
0.387948	0.047927	9.59278e-45	0.376158	767	YDL018C	ERP3
0.0716682	0.0810277	0.0722905	0.937974	170	YDL017W	CDC7
0.00118837	1.86707e-06			3271	YDL015C	TSC13
0.020715	0.0335445	2.23218e-11	0.000360579	3726	YDL014W	NOP1
0.00349466	4.58719e-08	0.858696	1	319	YDL013W	SLX5
0.0974783	0.0960964	1.86489e-21	3.49128e-05	1245	YDL012C	YDL012C
0.220302	0.0241474	2.25702e-41	0.518999	1195	YDL010W	GRX6
0.0145689	0.014133	0.107794	1	615	YDL008W	APC11
0.0278775	0.00499802	6.70409e-13	0.951009	2432	YDL007W	RPT2
0.0334826	0.0141744	0.000606087		606	YDL006W	PTC1
0.0060462	0.0624105	0.324311	0.205106	777	YDL005C	MED2
0.0106687	0.0403128	1.57841e-06	1.37307e-10	6074	YDL004W	ATP16
2.27775	9.92341e-09	4.58521e-235	1	780	YDL003W	MCD1
7.66782e-09	8.30553e-12	1	1	944	YDL002C	NHP10
1.10539e-37	0.0413307	1	0.884494	362	YDL001W	RMD1
0.0481971	0.036948	2.61189e-13	0.0374392	1997	YDR001C	NTH1
0.00761459	0.00644098	1.04899e-05	0.392415	5109	YDR002W	YRB1
3.76705e-43	6.98281e-29			283	YDR003W	RCR2
8.13075e-33	0.0723489	1	0.429115	529	YDR003W-A	YDR003W-A
0.0174739	1.16405e-06			435	YDR004W	RAD57
0.00920008	1.082e-08	0.114477	1	895	YDR005C	MAF1
1.6278e-21	2.78766e-26			427	YDR006C	SOK1
2.45531e-09	7.01454e-12	1	1	1238	YDR007W	TRP1
1.17681e-22	0.109404	1	0.424856	361	YDR011W	SNQ2
0.0068717	0.0278009	1.2465e-09	1.76697e-11	9001	YDR012W	RPL4B
0.0883224	1.89104e-08	1.22473e-05	1	512	YDR013W	PSF1
0.0642112	0.0864657	0.0398429	0.685963	264	YDR014W	RAD61
0.17361	0.00237045	5.80153e-30	1	891	YDR016C	DAD1
0.031476	0.0782835	0.0486084	0.563289	336	YDR017C	KCS1
0.0641943	0.0537954	1.02119e-16	0.027773	1601	YDR019C	GCV1
0.0478804	2.23912e-08	0.0288804	1	233	YDR020C	DAS2
0.0529488	0.0142579	0.120981	1	136	YDR021W	FAL1
0.000479334	5.61388e-09	1	1	579	YDR022C	ATG31
0.00890513	0.0146795		0.0112022	5034	YDR023W	SES1
0.0101972	0.02498	5.75747e-26	4.26145e-25	20518	YDR025W	RPS11A
0.0091189	2.40369e-08	0.0996026	1	840	YDR026C	NSI1
0.0493583	1.34436e-11			489	YDR027C	VPS54
3.77469e-78	2.36268e-16	1	1	648	YDR028C	REG1
3.90701e-30	0.230625	1	0.119548	272	YDR030C	RAD28
0.0194677	0.0387705	0.041038	0.567959	716	YDR031W	MIX14
0.0849475	0.0511822	3.00381e-70	7.54466e-10	4717	YDR032C	PST2
1.58375	0.14802	0	3.38256e-76	24893	YDR033W	MRH1
0.0385085	2.87153e-07			1939	YDR034C	LYS14
0.247801	0.458229	1.17289e-07	0.000508588	342	YDR034W-B	YDR034W-B
0.0483383	9.35106e-08	4.0632e-10	1	1666	YDR035W	ARO3
0.0225929	1.9469e-07	0.0806182	1	455	YDR036C	EHD3
0.0264397	0.0295981	1.17181e-15	0.000414584	3715	YDR037W	KRS1
0	0.47806			211	YDR038C	ENA5
6.79232e-42	0.74486			193	YDR040C	ENA1
1.62552e-06	0.0556587	1	0.764367	898	YDR041W	RSM10
0.00726767	0.0117292	0.237095	0.915784	1454	YDR043C	NRG1
7.69654e-09	1.57989e-09			643	YDR044W	HEM13
0.0150045	0.0171815	0.0407659	0.825508	1000	YDR045C	RPC11
0.00402718	0.028774	0.25314	0.321675	1345	YDR047W	HEM12
0.0188526	0.0293852	0.259644	1	305	YDR049W	VMS1
0.0222063	0.00753274	5.44229e-158	3.75228e-19	78036	YDR050C	TPI1
0.00850656	1.86033e-06	0.124623	1	858	YDR051C	DET1
0.0478402	1.43711e-06			471	YDR052C	DBF4
0.0198781	0.0201913	0.00265034	0.649735	1124	YDR054C	CDC34
2.26258	0.197069	0	1.22453e-21	9679	YDR055W	PST1
0.00695302	1.97906e-05			1882	YDR056C	EMC10
0.00497142	9.29173e-06	0.707428	1	468	YDR057W	YOS9
0.0117329	0.128575	0.595367	0.243382	365	YDR058C	TGL2
0.000487029	0.0522177	1	0.282045	941	YDR059C	UBC5
0.0199087	0.0461751	0.111804	0.456302	681	YDR060W	MAK21
0.0434529	0.0853026	0.00215818	0.268587	445	YDR061W	YDR061W
0.000769064	0.020164			2293	YDR062W	LCB2
0.00445855	0.0790577	0.277448	0.000129359	1431	YDR063W	AIM7
0.00863516	0.0145881	3.92607e-30	4.92717e-20	27298	YDR064W	RPS13
6.5851e-09	0.0498529	1	1	156	YDR065W	RRG1
0.0351203	7.59782e-08	0.233514	1	224	YDR066C	RTR2
0.00360675	0.0702119	0.705598	0.15521	663	YDR067C	OCA6
0.000819343	0.0356205	0.998852	0.644933	700	YDR068W	DOS2
0.0136702	0.00347231	0.382664	1	287	YDR069C	DOA4
0.397276	0.36655	6.46598e-36	5.66543e-11	1001	YDR070C	FMP16
0.0204993	7.65057e-06			2379	YDR071C	PAA1
0.0108604	1.09797e-08	0.0445595	1	1037	YDR072C	IPT1
0.0314785	0.0467447	2.18119e-07	0.105586	1187	YDR073W	SNF11
0.0580903	0.101925	1.27596e-08	0.000164184	1381	YDR074W	TPS2
0.0181812	6.10291e-10			647	YDR075W	PPH3
0.0118697	0.387105	0.707257	0.371872	137	YDR076W	RAD55
0.412286	0.0441027	0	8.56269e-60	99152	YDR077W	SED1
1.1349e-09	0.295577	1	0.0661347	246	YDR078C	SHU2
0.00503755	0.0454214	0.481892	0.645956	608	YDR079W	PET100
0.0138302	0.0813728	0.306107	0.518999	396	YDR079C-A	TFB5
4.23156e-41	0.0889211			454	YDR080W	VPS41
8.24056e-119	0.349651			194	YDR081C	PDC2
0.0195234	0.0449718			301	YDR082W	STN1
0.035434	0.054955	0.00760522	0.524224	545	YDR083W	RRP8
0.009891	2.05422e-07			1718	YDR084C	TVP23
0.594649	2.07026e-07	9.04557e-39	1	732	YDR085C	AFR1
0.00262708	0.0143384	9.94141e-05	1.97353e-05	10738	YDR086C	SSS1
0.00356922	5.3145e-06	0.62504	1	595	YDR087C	RRP1
7.07158e-56	0.193732		0.313718	209	YDR088C	SLU7
0.14705	9.33079e-15			313	YDR089W	VTC5
0.00453733	1.14733e-07	0.586565	1	730	YDR090C	YDR090C
0.00163147	0.0493597	0.776113	0.104518	1124	YDR091C	RLI1
0.00891739	1.08127e-08	0.00805054	1	1758	YDR092W	UBC13
0.0638686	0.0177707		1	226	YDR093W	DNF2
2.27705e-09	0.197885	1	0.531022	211	YDR096W	GIS1
1.03867	1.01485e-16	1.49451e-37	1	194	YDR097C	MSH6
0.00284668	0.0892814	0.154349	6.10004e-07	2048	YDR098C	GRX3
0.00633911	0.00540699	3.84798e-07	0.278835	8319	YDR099W	BMH2
0.005543	0.0118064	0.0659497	0.74445	1684	YDR100W	TVP15
0.0589033	0.088929	2.12866e-05	0.044125	720	YDR101C	ARX1
1.4191e-41	0.0370976	1	0.873789	460	YDR103W	STE5
1.50732e-18	7.06397e-19			927	YDR105C	TMS1
0.0785755	0.131408		0.227237	288	YDR107C	TMN2
0.00631821	0.105433	0.705598	0.360001	330	YDR108W	TRS85
0.00138131	0.0747483	1	0.779319	294	YDR109C	YDR109C
0.0414157	0.0417466	0.0950335	1	286	YDR110W	FOB1
0.0543069	1.02341e-06	0.019347	1	216	YDR111C	ALT2
0.45472	2.57685e-06	1.79467e-24	1	327	YDR113C	PDS1
0.0299005	0.0483835	0.000161354	0.0369787	1439	YDR115W	MRX14
0.00329166	0.0825327	0.683965	0.0581505	743	YDR116C	MRPL1
0.031838	4.34308e-05	0.000377865	1	687	YDR117C	TMA64
2.58211e-09	1.45331e-16	1	1	211	YDR118W	APC4
0.0281203	0.0162182	0.00195589	1	645	YDR119W	VBA4
0.0882073	0.490066	4.55268e-05	6.58361e-14	1061	YDR119W-A	COX26
0.0387869	0.11128	0.00148747	0.00825627	820	YDR120C	TRM1
0.00399219	2.79104e-07	0.724058	1	406	YDR121W	DPB4
0.0101142	2.48782e-09			693	YDR122W	KIN1
0.00875546	8.42208e-13			616	YDR123C	INO2
0.100619	0.474236	2.31742e-05	0.000421523	267	YDR124W	YDR124W
1.28176e-09	0.260718	1	0.169517	212	YDR126W	SWF1
0.000400853	0.0597138			1146	YDR127W	ARO1
0.0371713	5.24659e-08	0.00518784	1	409	YDR128W	MTC5
0.0303572	0.00694901	5.12327e-19	0.629107	3845	YDR129C	SAC6
0.279198	0.0316839	7.13038e-13	1	240	YDR130C	FIN1
6.4075e-300	0.329115	1		170	YDR131C	YDR131C
0.0136482	0.151789		0.7697	148	YDR132C	YDR132C
0.139006	0.753888	1.86285e-108	5.29314e-274	11996	YDR133C	YDR133C
6.23795e-16	0.038931	1	0.618414	703	YDR135C	YCF1
2.29715e-89	0.056179			416	YDR137W	RGP1
0.000527938	1.71251e-08	1	1	679	YDR139C	RUB1
0.018996	6.77492e-07	0.00495886	1	707	YDR140W	MTQ2
0.00299384	0.0461511	0.650721	0.482185	652	YDR141C	DOP1
2.89659e-09	0.0659769	1	0.813253	298	YDR142C	PEX7
0.000267588	5.28182e-08	1	1	385	YDR143C	SAN1
0.125739	0.141547	1.26135e-07	0.0207592	476	YDR144C	MKC7
0.0112998	0.0070086	0.398704		750	YDR145W	TAF12
1.15214	0.0538512	1.42477e-92	0.629607	461	YDR146C	SWI5
0.038504	1.15761e-23			601	YDR147W	EKI1
0.031807	0.0633861	2.85795e-10	5.70243e-05	1953	YDR148C	KGD2
0.137826	0.0625205	7.78078e-13	0.33876	580	YDR150W	NUM1
1.28757e-09	5.49616e-09	1	1	713	YDR151C	CTH1
0.0231251	1.33064e-09	0.00111552	1	1068	YDR152W	GIR2
0.00147861	4.52448e-08	0.884868	1	826	YDR153C	ENT5
0.028292	0.0213612	7.61054e-47	1.01785e-12	14782	YDR154C	YDR154C
0.0150773	0.0170526	6.82866e-56	1.19984e-29	38344	YDR155C	CPR1
0.0201081	6.02358e-06			1305	YDR156W	RPA14
0.00391331	0.0132674	2.17051e-05	0.000709089	10058	YDR158W	HOM2
0.0496719	0.0562305	0.000148416	0.461102	544	YDR159W	SAC3
0.044665	0.0965438		0.972217	130	YDR160W	SSY1
0.0900875	2.80968e-08	0.000240793	1	517	YDR161W	ACL4
0.0240454	0.0351418		0.515543	744	YDR162C	NBP2
1.22403e-72	9.65294e-08	1		362	YDR163W	CWC15
1.85648e-15	7.49135e-09	1	1	163	YDR164C	SEC1
0.0536355	1.27933e-07	1.55998e-05		891	YDR165W	TRM82
1.0718e-64	7.14009e-26			403	YDR166C	SEC5
0.010002	2.62367e-07	0.0307654	1	1092	YDR167W	TAF10
0.0119856	0.00550461	0.00274466	1	1811	YDR168W	CDC37
0.0102031	6.28596e-11	0.12495	1	831	YDR169C	STB3
0.029109	0.000111739	3.20732e-05	1	1095	YDR170C	SEC7
0.0165229	0.150996	0.0066457	2.71731e-05	1040	YDR171W	HSP42
0.0159031	1.72936e-06			2219	YDR172W	SUP35
2.16835e-09	7.82296e-14	1	1	311	YDR173C	ARG82
0.0225056	0.00448416	1.08664e-23	0.613394	6447	YDR174W	HMO1
0.0191037	1.18068e-05	0.0238591	1	628	YDR175C	RSM24
0.0196487	3.24396e-06		1	431	YDR176W	NGG1
0.013143	0.0220903	0.00119224	0.0925658	2630	YDR177W	UBC1
0.0162435	0.0574207	1.04551e-05	0.000166664	2287	YDR178W	SDH4
0.0843871	0.338599	0.00633873	0.00929483	218	YDR179W-A	NVJ3
0.00316456	0.167562	0.827985	0.178595	353	YDR181C	SAS4
0.0134985	0.0286849	0.0554413	0.601746	888	YDR182W	CDC1
3.00087e-10	2.25446e-08			316	YDR183W	PLP1
0.122326	0.108674	0.00650496	0.794402	161	YDR184C	ATC1
0.00421005	1.00747e-06	0.708825	1	635	YDR186C	SND1
0.0156902	0.0441667	0.00011692	0.0588871	1344	YDR188W	CCT6
0.0237959	5.00259e-06		1	580	YDR189W	SLY1
0.0346967	0.0266252	1.72022e-09	0.172215	1777	YDR190C	RVB1
1.28334	0.0393767	5.87981e-10	1	171	YDR191W	HST4
6.8498e-08	5.27684e-05			282	YDR192C	NUP42
0.00947062	0.0268702	0.0176582	0.441948	1159	YDR194C	MSS116
0.0142944	1.26767e-09	0.340439	1	352	YDR195W	REF2
4.02201e-05	6.344e-10			850	YDR196C	CAB5
0.0564665	0.0640801	0.00550225	0.455781	475	YDR197W	CBS2
0.199531	4.87748e-05			291	YDR198C	RKM2
0.0170666	2.18711e-06	0.295961	1	309	YDR200C	VPS64
0.0840389	1.28668e-05			735	YDR201W	SPC19
0.0368255	9.69698e-07			771	YDR202C	RAV2
0.0564405	0.0239791	2.02926e-06	0.730624	781	YDR204W	COQ4
0.00155857	0.0258334			428	YDR205W	MSC2
0.0800707	0.157159	0.00160683	0.538529	187	YDR206W	EBS1
0.0427058	0.00383415	1.80309e-10	1	1178	YDR208W	MSS4
0.143284	0.111565	5.54058e-59	2.71297e-13	2673	YDR210W	YDR210W
0.00541962	1.21664e-06	0.254672	1	807	YDR211W	GCD6
0.0146349	1.80693e-06	1.65724e-06	1	2425	YDR212W	TCP1
0.00141945	0.0292859	0.562156	0.0422703	2882	YDR214W	AHA1
0.139846	0.0195744			221	YDR217C	RAD9
0.0968122	1.17811e-06	1.96983e-08	1	453	YDR219C	MFB1
0.0163796	4.22251e-06	0.252226	1	329	YDR221W	GTB1
0.691836	0.106404	1.63695e-45	0.227224	613	YDR222W	YDR222W
1.09375	0.00591348	0	0.419432	18833	YDR224C	HTB1
0.786967	0.0149099	0	0.0124853	33118	YDR225W	HTA1
0.00291556	0.0041278	0.00184864	0.15896	13232	YDR226W	ADK1
0.080769	0.08399			294	YDR227W	SIR4
1.88377e-07	0.134256			328	YDR228C	PCF11
0.042619	0.0207924	0.0111961	1	366	YDR229W	IVY1
0.00265232	2.43572e-06			1075	YDR231C	COX20
2.04526e-09	2.2441e-09	1	1	1403	YDR232W	HEM1
0.00409828	1.57155e-06			9598	YDR233C	RTN1
0.00954815	0.0637154	0.0502181	0.0242045	1243	YDR234W	LYS4
4.16794e-16	0.0530968	1		584	YDR235W	PRP42
0.0010403	0.0377672	0.864171	0.374404	1036	YDR236C	FMN1
6.97369e-07	9.12157e-05			553	YDR237W	MRPL7
0.0113926	6.18952e-09	4.61024e-05	1	2294	YDR238C	SEC26
5.93635e-11	1.28671e-08	1	1	217	YDR239C	YDR239C
6.46495e-77	2.21335e-33			294	YDR240C	SNU56
0.0497336	6.2409e-09	0.038656	1	265	YDR241W	BUD26
0.0188199	0.404749	0.348193	0.00372143	243	YDR242W	AMD2
1.46643e-59	9.2792e-08	1	1	172	YDR243C	PRP28
0.00540854	0.103065			540	YDR244W	PEX5
0.0609363	0.00846057	9.22637e-20	0.881854	1692	YDR245W	MNN10
0.0882149	4.43295e-08	0.000526266	1	345	YDR246W	TRS23
0.0416318	9.82337e-07	0.0374385	1	392	YDR247W	VHS1
0.0456406	0.0502754	1.42476e-10	0.00933767	1943	YDR248C	YDR248C
7.15669e-09	6.95326e-16			274	YDR249C	YDR249C
0.00620884	0.0518945	0.213915	0.195849	972	YDR251W	PAM1
0.0708016	0.107056	0.00869707	0.601971	218	YDR252W	BTT1
0.0456183	2.5729e-06	0.170152	1	164	YDR253C	MET32
0.0808914	2.6377e-06	1.32714e-05	1	389	YDR254W	CHL4
4.74618e-42	0.0310301			131	YDR255C	RMD5
0.00857967	0.0497815			510	YDR257C	RKM4
0.0358171	0.0913611	6.54705e-08	0.000224818	1547	YDR258C	HSP78
0.0891757	0.0863976	4.84522e-05	0.575838	311	YDR259C	YAP6
0.00470075	0.0481915	0.645747	0.457274	586	YDR260C	SWM1
0.0653896	0.0594075	2.85748e-19	0.00392628	1635	YDR261C	EXG2
0.0328053	0.076907	2.04878e-06	0.00103223	1340	YDR262W	YDR262W
0.00274978	0.128868	0.476056	5.1557e-09	1377	YDR264C	AKR1
0.00233784	0.0293807	0.767309	0.820682	588	YDR265W	PEX10
0.00454918	0.0106352	0.490499	1	670	YDR266C	HEL2
0.00367221	9.28285e-05			510	YDR267C	CIA1
0.0290138	0.0156331	0.0449956	1	329	YDR268W	MSW1
0.00136062	7.52911e-07	0.819894	1	961	YDR270W	CCC2
0.0479141	0.0298922	1.01988e-13	0.135422	1800	YDR272W	GLO2
0.0126629	3.16985e-07			780	YDR275W	BSC2
0.0151837	0.0181238	1.45317e-34	3.04142e-16	20145	YDR276C	PMP3
0.0904958	1.55442e-06	0.000102734	1	438	YDR279W	RNH202
0.0387771	3.34732e-07	5.75407e-05	0.854499	1051	YDR280W	RRP45
0.0159261	0.913749	0.649845	2.03607e-07	196	YDR281C	PHM6
0.0193656	6.08338e-12		1	234	YDR282C	MRX10
0.00734013	2.60497e-08	0.2564	1	662	YDR283C	GCN2
0.00481348	0.0488958			1396	YDR284C	DPP1
2.92223e-09	0.12386	1	0.249492	411	YDR286C	YDR286C
1.32545e-14	3.2074e-06			526	YDR287W	INM2
0.0242705	6.78761e-06	0.0916206	1	630	YDR288W	NSE3
9.6482e-38	3.12817e-07			416	YDR289C	RTT103
1.64127e-48	0.132904			212	YDR291W	HRQ1
6.86695e-13	0.0276395			564	YDR292C	SRP101
0.00912331	0.0829361	0.164709	0.0032392	1109	YDR293C	SSD1
0.0056074	1.15118e-08	0.085944	1	1322	YDR294C	DPL1
6.3439e-32	2.57801e-08			453	YDR295C	HDA2
0.00599286	5.46226e-08	0.508961	1	703	YDR296W	MHR1
0.207632	0.106398	1.46006e-41	3.10228e-06	1534	YDR297W	SUR2
0.00189177	0.0213271	0.0580916	0.000303924	5842	YDR298C	ATP5
0.0394616	0.0304467	0.0167295	0.911318	498	YDR299W	BFR2
0.00869896	0.0167227		0.971801	720	YDR300C	PRO1
0.0154535	0.0763615			379	YDR301W	CFT1
0.106556	0.0150192	4.98705e-22	0.776372	1070	YDR302W	GPI11
0.0163316	0.0840869	0.0479325	0.168161	588	YDR303C	RSC3
0.00569146	0.00995628			4311	YDR304C	CPR5
0.0348702	0.0436534	0.0255876	0.813253	353	YDR305C	HNT2
0.0358819	0.0223377	0.0423654	1	338	YDR306C	YDR306C
0.13692	6.06058e-40			564	YDR307W	PMT7
1.08347e-23	5.67383e-28			408	YDR308C	SRB7
0.3087	0.0437933	4.66308e-64	0.0691856	1904	YDR309C	GIC2
0.0125365	0.0220729	0.0964405	0.847753	706	YDR310C	SUM1
2.05947e-47	0.259008			251	YDR311W	TFB1
0.0168066	1.60529e-16			397	YDR312W	SSF2
1.00103e-132	0.0381508			515	YDR313C	PIB1
0.00731723	1.71793e-05			467	YDR315C	IPK1
1.45937e-40	0.00557025			572	YDR316W	OMS1
0.025759	1.71037e-05			333	YDR318W	MCM21
0.0436682	5.68094e-07	4.84126e-07	1	799	YDR319C	YFT2
0.0140717	0.0794456	0.293023	0.190659	620	YDR320C	SWA2
0.10281	4.16549e-09	1.21997e-10	1	650	YDR320C-A	DAD4
0.00539925	2.02346e-06			1470	YDR321W	ASP1
0.00123003	7.16302e-09	0.930324	1	796	YDR322W	MRPL35
0.00813893	0.0197501	1.43279e-06	0.00419109	5427	YDR322C-A	TIM11
0.00431669	0.247168	0.858023	0.100341	234	YDR323C	PEP7
0.122576	0.0513924	1.83638e-05	0.699385	409	YDR324C	UTP4
0.329133	1.50829e-07	8.95054e-19	1	340	YDR325W	YCG1
0.0412005	3.16451e-07	0.0145489	1	310	YDR326C	YSP2
0.0151509	4.63528e-08	5.44205e-05	1	1734	YDR328C	SKP1
1.10411e-135	0.0262436			623	YDR329C	PEX3
0.0836015	0.0440515			518	YDR330W	UBX5
0.0509585	1.08421e-08		1	808	YDR331W	GPI8
9.19557e-81	4.23806e-12			135	YDR332W	IRC3
2.12789e-120	2.49142e-07	1	1	542	YDR333C	RQC1
0.00410218	0.149719	0.795098	0.122772	421	YDR334W	SWR1
4.07523e-12	0.0223353			651	YDR335W	MSN5
0.0161787	8.78465e-08	0.33956	1	297	YDR336W	MRX8
0.00435688	0.0677945	0.644234	0.240152	645	YDR337W	MRPS28
0.0198161	0.0835314	0.238835	0.636426	299	YDR338C	YDR338C
2.19892e-08	2.38007e-09	1	1	1150	YDR339C	FCF1
0.0129042	1.69469e-06	1.67909e-05	1	2028	YDR341C	YDR341C
0.35163	1.20181	1.75928e-31	1.78798e-60	2881	YDR342C	HXT7
0.573553	1.15728	3.44214e-36	1.31797e-35	1870	YDR343C	HXT6
0.00724404	0.0225259	3.55851e-06	0.00224654	11719	YDR345C	HXT3
0.0399203	0.0205983	5.47663e-13	0.303294	1957	YDR346C	SVF1
0.00621886	3.86063e-07	0.270969	1	810	YDR347W	MRP1
0.0231582	0.0808363	0.26509	0.496618	364	YDR348C	PAL1
1.06531e-08	0.0263186	1	0.518449	1176	YDR349C	YPS7
0.0195075	1.13832e-193			479	YDR350C	ATP22
0.00475699	1.72974e-101	0.688424		500	YDR351W	SBE2
3.9853e-13	3.70319e-12	1	1	371	YDR352W	YPQ2
0.0752486	0.0119574	2.99614e-71	0.165216	4624	YDR353W	TRR1
0.00118959	0.0570439	0.938551	0.180048	781	YDR354W	TRP4
0.25645	0.013917	6.22416e-18	1	412	YDR356W	SPC110
0.0462249	0.102081		0.0180358	725	YDR357C	CNL1
0.0407056	0.0576762			365	YDR358W	GGA1
0.0144835	1.24284e-35	0.090231	1	519	YDR359C	EAF1
2.04715e-30	0.0916361	1	0.177768	559	YDR361C	BCP1
0.0954615	5.16246e-07	1.31456e-06	1	417	YDR362C	TFC6
0.00667136	1.57383e-06	0.767309	1	237	YDR363W	ESC2
8.34672e-10	0.0548187	1	0.41748	670	YDR363W-A	SEM1
0	0.0943789			389	YDR364C	CDC40
0.0241213	0.186754	0.0162461	3.15422e-06	899	YDR365C	ESF1
0.0348922	0.263776	0.000707927	4.06541e-05	528	YDR366C	YDR366C
0.0235326	6.65128e-09	9.42008e-05	1	1078	YDR367W	KEI1
0.0237173	0.0310574	9.3448e-15	8.68383e-05	4122	YDR368W	YPR1
0.00417607	1.30008e-20			211	YDR369C	XRS2
1.94839e-301	2.59997e-36			281	YDR370C	DXO1
0.00477843	4.77276e-09			360	YDR371W	CTS2
0.00149239	4.15156e-06		1	1867	YDR372C	VPS74
0.0181102	8.23311e-89			1646	YDR373W	FRQ1
0.0352622	1.59447e-08	3.79738e-05	1	913	YDR374W-A	WIP1
1.49688e-21	3.28553e-20		1	451	YDR375C	BCS1
0.00180798	1.0667e-07	0.886765	1	740	YDR376W	ARH1
0.00200964	0.0181153	0.00617036	0.000156845	7919	YDR377W	ATP17
7.66361e-07	1.07656e-06			3273	YDR378C	LSM6
0.102906	1.6719e-07		1	373	YDR379W	RGA2
0.0715916	0.0193696	5.62253e-10	0.724063	1090	YDR379C-A	SDH6
0.00534982	0.0134161	8.63843e-06	0.0207592	6236	YDR381W	YRA1
0.00381327	0.0821377	0.883983	0.743911	288	YDR381C-A	YDR381C-A
0.011029	0.0160651	4.02627e-24	1.59883e-10	18335	YDR382W	RPP2B
0.0232297	5.93844e-05			316	YDR383C	NKP1
2.16538e-106	5.66463e-15			309	YDR384C	ATO3
0.0163083	0.0179057	3.29789e-38	3.14903e-13	17537	YDR385W	EFT2
0.169237	0.0659144	2.29789e-08	0.685963	342	YDR386W	MUS81
0.00321792	5.4167e-07	0.915157	1	359	YDR387C	CIN10
0.0178319	0.0108032	3.20732e-05	0.554268	2531	YDR388W	RVS167
0.04563	7.56251e-05	1.12836e-06	1	670	YDR389W	SAC7
0.0850533	0.0528918	6.02305e-05	0.764723	325	YDR390C	UBA2
0.0595513	0.0385277	2.5385e-08	0.370613	1008	YDR391C	YDR391C
0.0624973	9.68068e-07	0.00429961	1	426	YDR392W	SPT3
0.00760063	7.15847e-08			437	YDR393W	SHE9
0.0141636	0.0111378	1.53834e-05	0.536766	2387	YDR394W	RPT3
0.00286085	1.72673e-08	0.807989	1	630	YDR395W	SXM1
0.0602804	1.76886e-06			2175	YDR397C	NCB2
0.105896	9.7336e-09	2.5596e-06	1	531	YDR398W	UTP5
0.0714369	0.0309707	4.29712e-23	0.0163375	3402	YDR399W	HPT1
0.135105	0.0963048	7.3883e-18	0.00584652	969	YDR400W	URH1
0.0343213	0.206914	0.38264	0.50375	155	YDR403W	DIT1
0.0097284	1.33436e-08		1	1864	YDR404C	RPB7
1.51108e-08	6.51855e-07			656	YDR405W	MRP20
0.145144	0.142575	9.45552e-06	0.332864	302	YDR406W	PDR15
2.67703e-41	7.04048e-12			313	YDR407C	TRS120
3.10622e-09	1.25331e-09			758	YDR408C	ADE8
0.00316912	5.57515e-07	0.947645	1	221	YDR409W	SIZ1
0.0210343	0.0469238	0.0367546	0.165733	1069	YDR410C	STE14
0.0172711	0.0226347	1.42966e-05	0.25026	1896	YDR411C	DFM1
0.00351903	8.38223e-07			960	YDR412W	RRP17
0.0105538	1.70929e-08	0.426784	1	492	YDR414C	ERD1
0.00741754	3.56062e-42		1	516	YDR415C	YDR415C
0.0120809	1.52968e-26	0.436877		337	YDR416W	SYF1
0.00927636	0.0164349	1.18042e-21	6.99419e-12	16514	YDR418W	RPL12B
0.0208312	0.117267	0.484097	0.612117	211	YDR419W	RAD30
2.19328e-11	3.05728e-08	1	1	271	YDR420W	HKR1
6.15432e-07	2.56497e-06	0.822129		180	YDR421W	ARO80
0.0272011	9.90109e-05	0.304298	1	318	YDR422C	SIP1
0.0128435	0.220363	0.291317	0.0150461	342	YDR423C	CAD1
0.00731583	0.0605151	0.254533	0.282343	715	YDR424C	DYN2
0.0298682	0.121856	0.102294	0.227224	324	YDR425W	SNX41
0.00863649	0.0182036	0.0118261	0.241482	2368	YDR427W	RPN9
2.3782e-09	0.0652456	1	0.674625	406	YDR428C	BNA7
0.00737093	2.39404e-08	0.18761	1	1312	YDR429C	TIF35
0.0192099	0.00966085		1	360	YDR430C	CYM1
0.010332	3.29001e-09	0.563233	1	553	YDR432W	NPL3
0.00895417	0.000600613			439	YDR433W	YDR433W
0.0172682	0.0559308			1380	YDR434W	GPI17
2.79489e-14	3.17892e-08			443	YDR435C	PPM1
3.61712e-13	0.014736	1		191	YDR436W	PPZ2
0.00283466	0.143795	0.96061	0.308085	286	YDR438W	THI74
0.00869709	0.0539721	0.3897	0.692106	399	YDR439W	LRS4
0.117164	0.0734709	1.01549e-05	0.418553	394	YDR440W	DOT1
0.0256022	0.0627895	1.43074e-05	0.002017	1383	YDR441C	APT2
0.0255373	0.214957	0.362444	0.349726	199	YDR443C	SSN2
0.0360389	1.02857e-14			546	YDR444W	YDR444W
0.0118027	0.0277907	8.6455e-19	1.06049e-16	12888	YDR447C	RPS17B
0.0377218	0.0105913			584	YDR449C	UTP6
0.0117616	0.0216242	1.09528e-23	2.27986e-20	19098	YDR450W	RPS18A
1.63843	0.0576054	3.61298e-157	0.115057	1076	YDR451C	YHP1
0.00934852	0.0130221	2.15303e-05	0.428748	2397	YDR452W	PPN1
0.00911255	0.0668368	0.234427	0.347103	619	YDR453C	TSA2
0.00135094	0.00871632	0.357858		3982	YDR454C	GUK1
0.0251979	0.0106964			1331	YDR456W	NHX1
0.0241827	0.035102	0.00280709	0.728233	548	YDR457W	TOM1
0.0210617	0.102359	0.0272128	0.00329422	998	YDR458C	HEH2
0.0205668	0.000385201	0.121763	1	490	YDR459C	PFA5
0.063368	0.0359838	2.05416e-05	0.680627	603	YDR460W	TFB3
1.49072	0.392933	0	3.94617e-112	8701	YDR461W	MFA1
0.178737	8.84891e-08	2.50428e-06	1	342	YDR461C-A	YDR461C-A
0.0114197	0.0489711	0.120017	0.346588	763	YDR462W	MRPL28
0.0139888	0.0271555	0.0545195	0.612473	888	YDR463W	STP1
0.111363	0.0105689	1.93348e-08	1	476	YDR464W	SPP41
0.277434	0.0309918			468	YDR465C	RMT2
0.0387573	3.96978e-05	0.0298881		417	YDR466W	PKH3
0.0059592	1.56094e-11			956	YDR468C	TLG1
0.0287173	3.17973e-10			370	YDR469W	SDC1
0.00720529	0.110056	0.674089	0.438439	315	YDR470C	UGO1
0.0078189	0.030385	1.18842e-14	4.10582e-23	14861	YDR471W	RPL27B
0.00898234	0.01736			808	YDR472W	TRS31
0.0133057	2.91038e-11	0.300166	1	373	YDR473C	PRP3
0.005744	0.0113955	0.556066	1	509	YDR475C	JIP4
0.0405197	0.026129	5.04561e-13	0.308064	1673	YDR476C	YDR476C
0.0125993	0.0488062	0.0250637	0.279044	878	YDR477W	SNF1
0.0052061	0.111904	0.885065	0.742556	222	YDR478W	SNM1
8.90076e-10	3.88748e-15			690	YDR479C	PEX29
0.317916	0.0325708	8.97607e-13	1	278	YDR480W	DIG2
0.0162129	0.0658014	0.0339792	0.0810184	942	YDR481C	PHO8
0.00396456	5.02996e-06			632	YDR482C	CWC21
0.00583011	0.0121144			4160	YDR483W	KRE2
1.93594e-69	9.81316e-49			197	YDR484W	VPS52
0.0124437	0.00826665	0.505113	1	306	YDR485C	VPS72
1.51627e-05	0.0280519			1108	YDR486C	VPS60
0.00403207	1.01061e-08			1511	YDR487C	RIB3
0.0232678	0.082243			281	YDR489W	SLD5
5.92951e-23	0.0738384			264	YDR490C	PKH1
0.0369557	0.0677075	0.00203295	0.154308	846	YDR492W	IZH1
0.0572548	0.0422852	0.0299721	0.839926	401	YDR493W	MZM1
0.00487521	4.28357e-08	0.699168	1	588	YDR494W	RSM28
1.07504e-07	2.52005e-10			242	YDR495C	VPS3
0.0473862	0.0887042	0.0456846	0.724063	254	YDR496C	PUF6
0.00101529	0.0397361	0.00154586	1.17797e-93	46494	YDR497C	ITR1
1.54304e-28	1.32603e-06			587	YDR498C	SEC20
0.00820629	2.46047e-06			380	YDR499W	LCD1
0.00714811	0.0302432	4.44685e-06	4.09615e-09	7549	YDR500C	RPL37B
0.00303836	0.0181519	2.69414e-08	1.54646e-21	27170	YDR502C	SAM2
0.114035	2.03719e-07			630	YDR503C	LPP1
0.010736	1.62322e-07	0.510613	1	402	YDR504C	SPG3
2.1019e-22	0.0554628	1	0.971553	260	YDR505C	PSP1
0.684123	2.7965e-08	2.43818e-74	1	647	YDR507C	GIN4
0.0384137	1.54395e-06			2485	YDR510W	SMT3
0.0407113	0.0244175	0.00109197	0.894053	621	YDR511W	SDH7
1.34713e-09	8.64701e-12	1	1	1293	YDR512C	EMI1
0.0616806	0.0482506	3.1551e-34	5.56836e-05	3522	YDR513W	GRX2
0.0397549	0.0917525	0.00336347	0.233358	453	YDR514C	YDR514C
0.0188029	0.0871978	0.26764		394	YDR515W	SLF1
0.0760281	0.07868	2.92534e-09	0.0173427	1284	YDR516C	EMI2
0.0228118	1.12624e-08	1.9301e-06	1	1471	YDR517W	GRH1
0.0695648	0.123739	8.34506e-18	6.82173e-08	1547	YDR518W	EUG1
0.0358174	0.0558315	5.56412e-36	1.70404e-13	4794	YDR519W	FPR2
1.48654e-50	3.09676e-22			239	YDR520C	URC2
0.0352088	0.0609681	0.0252007	0.268876	672	YDR524C	AGE1
0.111205	0.00633531	0	1.58231e-18	141011	YDR524C-B	YDR524C-B
0.0900525	2.57723e-05	0.0264138	1	138	YDR524C-A	YDR524C-A
0.0127036	0.00901504	9.91444e-07	0.42648	4217	YDR525W-A	SNA2
1.18595e-24	4.0104e-08			419	YDR527W	RBA50
0.141094	0.0478307	6.37799e-09	0.629286	586	YDR528W	HLR1
0.00773044	0.0781951	1.38126e-05	1.8035e-25	5525	YDR529C	QCR7
0.0146952	0.0735365	0.0865557	0.101963	783	YDR530C	APA2
0.00645768	0.00341452	0.0893576	1	1161	YDR531W	CAB1
3.98504e-84	0.0571508	1	0.932608	302	YDR532C	KRE28
0.115538	0.223023	3.20251e-76	1.10154e-48	6001	YDR533C	HSP31
0.0634736	6.92189e-10	0.0109093	1	362	YDR538W	PAD1
0.0131209	0.0823668	0.0179056		1107	YDR539W	FDC1
0.136133	0.101972	6.10323e-08	0.342192	345	YDR540C	IRC4
0.0178161	0.00643325	0.124595	1	494	YDR541C	YDR541C
0.0271531	0.0860866	0.0097466	0.0502113	868	YEL073C	YEL073C
0.0545436	9.00414e-06			715	YEL072W	RMD6
0.00337262	0.0581618	0.0103342	2.92709e-37	15482	YEL071W	DLD3
0.00794007	6.83484e-09	0.411864	1	601	YEL068C	YEL068C
0.0808005	1.20872e-08	2.76353e-10	1	697	YEL066W	HPA3
0.216702	0.377483	1.44708e-13	2.72143e-08	841	YEL065W	SIT1
0.157248	0.125082	0.000133019	0.471609	233	YEL064C	AVT2
0.00167636	2.0558e-07	0.832656	1	1066	YEL063C	CAN1
0.0165891	1.48128e-07			354	YEL062W	NPR2
0.531433	0.0404675	8.40199e-18	1	225	YEL061C	CIN8
0.0507547	0.0565667	1.78298e-24	2.76685e-06	3528	YEL060C	PRB1
0.0238048	0.0486795	0.0145945	0.505487	652	YEL059C-A	SOM1
0.01306	0.0157318	0.00279868	0.529812	1848	YEL058W	PCM1
8.00579e-10	0.316576	1	0.181855	190	YEL057C	SDD1
0.0143098	8.30613e-99	0.0600784	1	689	YEL056W	HAT2
0.0355586	0.0587459	0.0233092	0.29012	697	YEL055C	POL5
0.0133146	0.0266176	4.28686e-28	6.69647e-18	13350	YEL054C	RPL12A
0.000468895	8.9405e-07	1		466	YEL053C	MAK10
0.0246676	2.24903e-12		1	521	YEL052W	AFG1
1.15855e-60	47.1693			3579	YEL051W	VMA8
1.76985e-09	0.0737673	1	0.0687755	874	YEL050C	RML2
0.218891	0.0282009	3.67191e-54	0.165563	1693	YEL047C	FRD1
0.00345447	7.97275e-08			2378	YEL046C	GLY1
0.011602	0.0305215			1444	YEL044W	IES6
2.52123e-07	0.0341284	1	0.953031	439	YEL043W	YEL043W
0.0556475	0.0269869	2.21561e-10	0.537617	1023	YEL042W	GDA1
0.00969528	1.75753e-06	0.511519	1	377	YEL041W	YEF1
0.224408	0.0602727	1.68615e-38	0.0197142	1584	YEL040W	UTR2
0.0569052	1.03548e-08	0.0105529	1	435	YEL038W	UTR4
4.25191e-08	0.0417504	1	0.194671	1149	YEL037C	RAD23
0.0206561	1.82248e-09		1	1247	YEL036C	ANP1
0.000413478	0.0890647	0.0257835	0	44893	YEL034W	HYP2
0.430805	0.0765209	1.66691e-17	0.469872	423	YEL032W	MCM3
0.0240044	0.0297941	2.259e-09	0.0678067	2271	YEL031W	SPF1
1.01261e-40	0.125398	1	0.851441	171	YEL030W	ECM10
2.07213e-07	1.28324e-06			558	YEL029C	BUD16
0.0277249	2.07957e-22		1	130	YEL028W	YEL028W
0.0013027	0.00749862	0.00028234	3.81929e-07	22669	YEL027W	VMA3
0.0254312	0.02253	1.21539e-22	0.000115246	6796	YEL026W	SNU13
3.45346e-75	5.48351e-33			230	YEL025C	YEL025C
0.0228995	0.181697	1.89661e-16	3.1797e-51	4264	YEL024W	RIP1
0.0260263	0.0252312	0.135609	1	356	YEL022W	GEA2
0.0186475	9.01763e-09	0.00109772	1	947	YEL021W	URA3
0.00161759	0.04906	0.757313	0.112103	1287	YEL020W-A	TIM9
0.0143719	1.16877e-07	0.444707	1	297	YEL018W	EAF5
0.0106427	0.0260409	2.34823e-33	3.69705e-40	36047	YEL017C-A	PMP2
0.201853	0.0439582	1.05333e-36	0.240471	970	YEL017W	GTT3
0.0548159	9.46122e-05	0.00155092		350	YEL016C	NPP2
0.00803076	5.20435e-07	0.151771	1	1049	YEL015W	EDC3
0.0204314	1.00492e-06			792	YEL013W	VAC8
0.0600113	0.0366532	8.16415e-06	0.334967	1068	YEL012W	UBC8
0.132867	0.103895	1.93624e-17	0.00362371	965	YEL011W	GLC3
0.00116325	0.0114679	0.00102721	4.17675e-12	21304	YEL009C	GCN4
0.0297913	0.0588877	0.00313991	0.0975404	1028	YEL007W	MIT1
0.0417361	0.0209865	0.00199058	0.674551	1027	YEL006W	YEA6
0.0186218	2.12457e-05			355	YEL005C	VAB2
0.0246622	0.0621022			370	YEL004W	YEA4
1.54215e-09	1.54654e-10	1	1	332	YEL003W	GIM4
0.00168493	7.05441e-08	0.136833	1	4300	YEL002C	WBP1
0.00407749	0.0122538	0.0923396	0.420508	2785	YEL001C	IRC22
0.725302	1.4939e-05			1227	YER001W	MNN1
0.0282524	7.51774e-05	0.14371		233	YER002W	NOP16
0.149083	0.0377929	1.79197e-90	6.93583e-05	4297	YER003C	PMI40
0.0479831	0.0157006	2.88057e-13	0.287421	2642	YER004W	FMP52
0.0284575	7.18153e-06	0.104053	1	285	YER005W	YND1
0.0321135	0.0307872	9.88939e-06	0.370613	1241	YER006W	NUG1
0.00528747	9.1025e-08	0.085944	1	1672	YER007C-A	TMA20
0.00242772	0.049437	0.704254	0.331559	751	YER008C	SEC3
0.00301278	0.00682514	0.00160238	0.111985	8768	YER009W	NTF2
2.23376e-08	0.0335148	1		1151	YER010C	YER010C
0.0112652	0.012051	0.000122267	0.344977	3387	YER012W	PRE1
3.34915e-08	5.67347e-06			399	YER013W	PRP22
0.00353541	5.64319e-06	0.745591	1	416	YER014W	HEM14
4.50672e-36	0.126385	1	0.706514	208	YER015W	FAA2
0.0731287	8.43181e-193	2.69168e-08		785	YER016W	BIM1
0.00876327	0.0365112	0.150064		726	YER017C	AFG3
0.295171	0.031416	5.61901e-23	0.973239	414	YER018C	SPC25
0.0620815	8.64466e-08	3.56415e-06	1	584	YER019W	ISC1
0.00138723	2.98122e-07			5365	YER019C-A	SBH2
0.00613194	2.34675e-06			750	YER020W	GPA2
0.00875595	0.00515575	0.000167549	0.937974	2576	YER021W	RPN3
4.98763e-111	4.26025e-37			319	YER022W	SRB4
0.00126129	0.0107032		0.00096948	8870	YER023W	PRO3
8.57953e-10	0.178887	1	0.0608906	353	YER024W	YAT2
0.00520842	5.91592e-07	0.0251057	1	2775	YER025W	GCD11
0.00323785	0.00959763	0.00644166	0.158627	5496	YER026C	CHO1
0.0124578	0.0442498	0.010886	0.196828	1124	YER027C	GAL83
0.0386587	0.0281055	0.255877	1	158	YER028C	MIG3
1.71711e-09	1.82123e-10	1	1	630	YER029C	SMB1
2.43547e-54	5.4545e-08			263	YER030W	CHZ1
0.0306686	0.00343678	4.2525e-16	1	2117	YER031C	YPT31
0.744847	0.0904164	6.58591e-23	0.765445	199	YER032W	FIR1
0.021974	4.30429e-08	0.179951	1	264	YER033C	ZRG8
1.22014e-07	7.33352e-06			396	YER034W	YER034W
0.00804627	0.0325706	0.194021	0.0624687	2010	YER035W	EDC2
0.0212286	0.0126941	2.65026e-07	0.505824	2414	YER036C	ARB1
0.192877	0.154457	3.76422e-10	0.0247044	485	YER037W	PHM8
0.0170638	6.86182e-09			356	YER039C	HVG1
0.063495	0.00316267	0.0167432	1	367	YER040W	GLN3
0.00902481	0.133753	0.700133	0.660656	196	YER041W	YEN1
0.0649728	4.57931e-07	2.33872e-10	1	1049	YER042W	MXR1
0.0015628	0.0101939	8.24726e-06	3.44619e-12	27217	YER043C	SAH1
0.00281927	0.104727	0.119091	2.25984e-18	3232	YER044C	ERG28
0.070633	0.40536	0.0167584	0.0199369	168	YER045C	ACA1
0.00657396	0.000111348			516	YER046W	SPO73
2.91466e-231	0.176606			146	YER047C	SAP1
0.0212048	0.0348448	0.00501953	0.499905	854	YER048C	CAJ1
0.0110373	0.0238002	2.79675e-05	0.0626569	2847	YER048W-A	ISD11
0.0324491	0.0268763	0.000613024	0.597054	940	YER049W	TPA1
8.16316e-07	1.75681e-07	1	1	348	YER050C	RSM18
1.34204e-76	0.217009			279	YER051W	JHD1
0.00844936	0.0209157	0.055061	0.445927	1720	YER052C	HOM3
0.135165	0.186872	4.53963e-28	8.60013e-21	2753	YER053C	PIC2
0.573502	0.65642	1.36563e-157	1.93521e-163	7894	YER053C-A	YER053C-A
0.173981	0.0395731	0.000543823	1	229	YER054C	GIP2
1.18057e-09	0.0143345	1	0.0274899	5469	YER055C	HIS1
0.0493539	0.0563582	4.5552e-25	2.21141e-07	3941	YER056C	FCY2
0.0112341	0.0307716	8.99482e-13	5.66543e-11	8190	YER056C-A	RPL34A
0.0140709	0.00531214	3.09502e-14	0.514642	5672	YER057C	HMF1
0.00376883	1.56468e-06	0.959637	1	200	YER058W	PET117
0.0299866	3.6961e-10			523	YER059W	PCL6
0.00297968	0.0487373	0.920167	0.669768	571	YER060W	FCY21
0.00842479	0.0677829	0.650188	0.924827	243	YER061C	CEM1
0.0828619	0.0531453	5.7266e-34	3.62024e-05	3228	YER062C	GPP2
0.0545666	0.011335	1.57058e-30	0.240176	3650	YER063W	THO1
0.00887555	5.07206e-07			200	YER064C	VHR2
0.0417222	0.0801339	0.0509489	0.608277	342	YER065C	ICL1
1.14008e-17	1.94633e-08	1	1	171	YER066W	RRT13
0.710509	0.389876	1.58713e-82	6.58417e-12	1919	YER067W	RGI1
2.02808e-11	0.0367732	1	0.537056	723	YER068W	MOT2
0.0163167	0.0746627	0.00931582	7.1169e-05	1866	YER069W	ARG5,6
1.99852	0.0310987	0	0.232567	2547	YER070W	RNR1
0.107921	2.39062e-07	2.00358e-05	1	740	YER071C	TDA2
0.00537498	0.068436	0.000709618	8.93699e-31	5134	YER072W	VTC1
0.00901805	0.0211558	0.013754	0.389192	1962	YER073W	ALD5
0.00718764	0.025406	1.35934e-23	5.63909e-40	27142	YER074W	RPS24A
0.0176463	4.45587e-16			570	YER074W-A	YOS1
0.00574887	0.0426408	0.739267	0.972465	296	YER075C	PTP3
1.97457e-234	0.307491			142	YER076C	YER076C
0.0173675	0.049543			370	YER077C	MRX1
0.0894113	0.0348553	1.27887e-09	0.49219	960	YER078C	ICP55
0.0208016	0.0268241	0.690287	1	165	YER078W-A	YER078W-A
0.191734	0.0638954	1.11314e-14	0.189303	864	YER079W	YER079W
0.0398347	0.0667555	1.83493e-05	0.147348	788	YER080W	AIM9
0.0205785	0.143582	5.09313e-05	1.53193e-08	3171	YER081W	SER3
0.00374848	0.0070856			274	YER082C	UTP7
2.31075e-08	0.0195149			1196	YER083C	GET2
0.125566	1.71757e-08	0.000958893	1	180	YER084W	YER084W
0.0176992	0.0162739	6.99526e-05	0.33876	2348	YER086W	ILV1
0.0170686	0.0814917	0.173026	0.503952	386	YER087W	AIM10
0.0644298	0.0258206	2.09384e-60	6.84506e-05	5523	YER087C-B	SBH1
0.0193407	6.36063e-06			1819	YER088C	DOT6
0.106814	9.34193e-08	0.0013369	1	204	YER088C-A	YER088C-A
0.0318704	4.87213e-06			1603	YER089C	PTC2
0.0136045	0.02208	0.00127677	0.329331	1619	YER090W	TRP2
0.0271796	0.0270493	1.04116e-80	1.56107e-24	30946	YER091C	MET6
1.43416e-09	1.17845e-08	1	1	824	YER092W	IES5
4.69785e-07	0.000171203			510	YER093C-A	AIM11
0.0103014	0.00217769	2.62121e-08	1	4011	YER094C	PUP3
0.579349	0.0180866	1.86017e-74	0.88619	902	YER095W	RAD51
1.63949e-40	1.93544e-11			258	YER098W	UBP9
0.0294136	9.01753e-05	0.000443966	1	864	YER099C	PRS2
2.83728e-09	1.09166e-11			1611	YER100W	UBC6
0.0125596	6.39877e-11	0.57038	1	260	YER101C	AST2
0.0112958	0.0324857	2.86998e-27	1.97723e-38	21960	YER102W	RPS8B
0.0973559	0.353474	6.47695e-13	2.66872e-12	1094	YER103W	SSA4
0.108891	0.21521	0.00117358	0.0565347	289	YER104W	RTT105
0.00461183	3.69371e-08	0.703116	1	398	YER105C	NUP157
0.000446987	0.00466463	1	1	953	YER107C	GLE2
0.0281006	1.97675e-06			834	YER110C	KAP123
0.399773	8.29756e-06	2.92621e-18	1	361	YER111C	SWI4
0.00525228	3.61347e-06			755	YER112W	LSM4
0.0883892	3.46498e-11		1	531	YER113C	TMN3
0.0195349	8.50071e-05	0.217165	1	298	YER114C	BOI2
1.24311e-18	9.24267e-08	1	1	496	YER115C	SPR6
4.5697e-31	0.0961482			340	YER116C	SLX8
0.00869945	0.0412746	2.00316e-23	6.07808e-52	27581	YER117W	RPL23B
0.23349	0.00967925	1.65544e-31	1	918	YER118C	SHO1
0.0298948	0.00965891	0.0120204	0.8805	1519	YER119C	AVT6
0.0284444	0.0185921	2.49698e-25	0.00869903	4583	YER120W	SCS2
0.0527342	0.00851417	7.00291e-24	0.710927	2431	YER122C	GLO3
3.0519e-09	0.000345599			565	YER123W	YCK3
2.12831	0.0488426	0	0.0699474	3916	YER124C	DSE1
0.00471805	0.00307232		1	958	YER125W	RSP5
0.0501011	0.0644115	1.17454e-07	0.0162043	1236	YER126C	NSA2
0.0388797	0.0446205	0.00160871	0.711694	478	YER127W	LCP5
0.00701232	0.0605722	0.668792	0.813253	325	YER129W	SAK1
0.000920447	3.21774e-08			1411	YER130C	COM2
0.00855368	0.0401158	3.6404e-12	1.63863e-29	13254	YER131W	RPS26B
0.00252053	0.169754	1	0.340469	259	YER132C	PMD1
1.29911e-08	0.00522485	1		5026	YER133W	GLC7
0.00609041	0.0376108		0.54541	818	YER134C	YER134C
0.00232364	0.00954902	0.240462	0.467264	3097	YER136W	GDI1
0.0203714	0.524966	0.379324	3.09007e-05	263	YER139C	RTR1
0.0338517	0.0117655		1	295	YER140W	EMP65
0.00571426	0.0287876	0.128784	0.35101	1330	YER141W	COX15
0.0553115	0.000518758			507	YER142C	MAG1
0.00233138	0.00552457	0.91653	1	483	YER143W	DDI1
0.0498128	1.3793e-05		1	328	YER144C	UBP5
0.0107486	0.0943394	7.71208e-06	4.73554e-29	7285	YER145C	FTR1
0.00242229	5.43084e-07	0.540053	1	1539	YER146W	LSM5
9.01697e-25	9.32526e-09			252	YER147C	SCC4
0.0042363	0.0025701			2559	YER148W	SPT15
0.0461584	0.00645925	0.00267018	1	570	YER149C	PEA2
1.73267	0.278822	1.59726e-230	8.28899e-23	3329	YER150W	SPI1
5.34283e-35	2.55445e-07			529	YER151C	UBP3
0.179027	0.00544873	2.25702e-41	1	932	YER152C	YER152C
0.209169	1.03028e-05	7.31209e-68	1	1357	YER154W	OXA1
1.48413e-33	2.20355e-08			650	YER155C	BEM2
0.00216128	0.0582668	0.6089	0.05998	1099	YER156C	YER156C
0.0044327	2.83511e-08	0.727977	1	517	YER157W	COG3
0.129396	0.0463901	1.54954e-15	0.360001	934	YER158C	YER158C
0.00509561	0.0729267	0.123339	6.51697e-05	2006	YER159C	BUR6
0.00090456	0.0245623	0.894019	0.547837	1013	YER161C	SPT2
0.049992	1.50015e-08	0.0237167	1	304	YER162C	RAD4
4.96143e-19	0.0107969	1	0.901358	1283	YER163C	GCG1
0.00881161	4.6999e-06	0.490213	1	436	YER164W	CHD1
0.00661053	0.0126862	1.22219e-06	0.020047	5946	YER165W	PAB1
0.0860929	2.36763e-05			740	YER166W	DNF1
0.0477461	0.00556772	0.00366261	1	434	YER167W	BCK2
8.00231e-74	5.74867e-10			483	YER168C	CCA1
0.0625692	1.56477e-81			312	YER169W	RPH1
0.211291	7.12367e-07	1.29437e-11	1	405	YER170W	ADK2
1.39536e-09	3.87872e-12			383	YER171W	RAD3
8.4871e-116	7.43647e-65	1	1	242	YER172C	BRR2
2.75898e-277	0.19151			204	YER173W	RAD24
0.0082626	4.50029e-10			386	YER174C	GRX4
0.0393932	0.136997	1.10198e-09	1.45785e-07	1817	YER175C	TMT1
0.0202226	1.99586e-06	0.00984068	1	720	YER176W	ECM32
0.00611463	0.00768319	1.08921e-33	7.74762e-10	34636	YER177W	BMH1
0.00523273	0.0172065	5.32816e-06	1.37252e-06	9470	YER178W	PDA1
2.13886e-150	1.35448e-19			448	YER180C	ISC10
0.0481923	0.103928	0.00217951	0.110221	505	YER182W	FMP10
0.0062411	2.56584e-08	0.576397	1	373	YER183C	FAU1
0.00366011	0.003167		1	581	YER186C	YER186C
4.81408e-08	0.552209	1	0.00120774	204	YER187W	YER187W
0.0142696	0.407656	3.91995e-11	1.08306e-122	4117	YFL062W	COS4
0.0910387	0.422292	1.79378e-05	8.45619e-12	549	YFL059W	SNZ3
8.16566e-19	0.649509			143	YFL054C	AQY3
0.0545922	0.114734	0.163657	0.669598	212	YFL050C	ALR2
0.054271	4.17624e-08	0.0264176	1	228	YFL049W	SWP82
0.00187144	6.47327e-06		1	1254	YFL048C	EMP47
0.0277397	1.35256e-08			470	YFL047W	RGD2
0.0274171	0.00521805	0.00473296	1	582	YFL046W	FMP32
0.0922161	0.0122737	3.22749e-195	5.86903e-08	16920	YFL045C	SEC53
0.112186	8.791e-06			430	YFL044C	OTU1
3.61776e-08	1.25042e-09			461	YFL042C	LAM5
0.037157	4.94538e-05	0.154928	1	203	YFL041W-A	YFL041W-A
0.0423572	0.0803617	3.51812e-05	0.00254479	1092	YFL041W	FET5
0.00406822	0.00577417	4.8052e-21	6.78091e-09	36307	YFL039C	ACT1
0.0038506	1.10646e-08	0.00039003	1	5330	YFL038C	YPT1
0.33467	0.0069442	1.50819e-227	0.551761	4497	YFL037W	TUB2
2.28128e-298	1.34314e-136	1	1	308	YFL036W	RPO41
0.0284587	2.18058e-06	0.0371965	1	566	YFL034C-B	MOB2
0.0252127	0.0331607	7.40434e-13	0.0033745	3109	YFL034C-A	RPL22B
0.0128748	0.0452784	0.407258	0.724144	450	YFL034W	MIL1
0.00153444	0.285824			201	YFL033C	RIM15
0.00517149	1.49239e-08	0.822129	1	285	YFL032W	YFL032W
0.0320561	0.0293758	3.7389e-93	5.99137e-29	19144	YFL031W	HAC1
0.101598	0.183885	5.57381e-08	0.00362042	544	YFL030W	AGX1
1.06201e-08	1.54737e-20			310	YFL029C	CAK1
0.00217099	0.0356363	0.634402	0.315518	1143	YFL028C	CAF16
0.223268	7.77347e-09	2.21263e-11	1	381	YFL027C	GYP8
1.18973	0.211829	0	2.89557e-91	13583	YFL026W	STE2
2.53208e-09	0.239533			194	YFL025C	BST1
0.0434092	8.84212e-08	0.00349166	1	437	YFL024C	EPL1
0.0157214	0.0576074	0.470186	0.868129	284	YFL023W	BUD27
0.0101512	0.0157348	0.00050985	0.207329	2936	YFL022C	FRS2
0.138276	0.0193342	2.6565e-45	0.462229	1913	YFL021W	GAT1
0.00613941	0.0279304	0.00329553	0.00380767	3605	YFL018C	LPD1
0.0166058	0.0930919	0.213539	0.515133	340	YFL017W-A	SMX2
0.0985221	0.0298748	4.20489e-21	0.380459	1132	YFL017C	GNA1
0.005551	0.0468277	0.542592	0.488504	619	YFL016C	MDJ1
0.516176	0.996558	6.2876e-140	1.72324e-142	15738	YFL014W	HSP12
0.0194489	4.9599e-08		1	326	YFL013C	IES1
0.00427165	0.0783066	0.0908945	2.69239e-09	2497	YFL010C	WWM1
0.000507232	5.13246e-22			455	YFL009W	CDC4
0.6825	9.7838e-06	8.12021e-61	1	582	YFL008W	SMC1
2.66829e-09	1.16131e-08	1	1	386	YFL007W	BLM10
0.00451562	0.00570953	0.0142876		3245	YFL005W	SEC4
0.012402	0.0220679	0.00379571	0.293915	1761	YFL004W	VTC2
2.7958e-10	1.08653e-08	1		446	YFL002C	SPB4
7.48595e-09	4.07922e-10			469	YFL001W	DEG1
0.0333996	0.000260524			238	YFR001W	LOC1
6.43088e-107	9.31173e-12			793	YFR002W	NIC96
2.27858e-281	1.04983e-20	1		557	YFR003C	YPI1
0.0141067	0.00521972	4.31822e-05	0.870895	2840	YFR004W	RPN11
0.0271605	5.22818e-08	0.0701934	1	401	YFR005C	SAD1
0.00731484	0.0535182	0.221115		669	YFR006W	YFR006W
6.20084e-07	0.019686	1	1	224	YFR007W	YFH7
1.07582e-07	2.76444e-22			178	YFR008W	FAR7
0.00364593	0.0190102	0.617122	0.943909	625	YFR009W	GCN20
0.00627287	0.0377185			1708	YFR010W	UBP6
0.00141746	0.0152378	0.63204	0.679015	1526	YFR011C	MIC19
7.9512e-07	0.0250852	1	1	279	YFR013W	IOC3
0.0160095	0.0240869	0.180079	0.713649	872	YFR014C	CMK1
0.131612	0.234615	4.28021e-05	0.0020918	514	YFR015C	GSY1
0.00436912	0.0208552	0.556151	0.681589	1188	YFR016C	YFR016C
0.0229963	0.122664	0.0125428	0.0238674	664	YFR017C	IGD1
1.35248e-09	0.0570075	1	0.725747	407	YFR018C	YFR018C
0.109834	4.04185e-08	5.83518e-05	1	244	YFR019W	FAB1
1.13722e-09	0.33965	1	0.0293752	218	YFR020W	CSS2
2.03338e-07	0.000446292			233	YFR021W	ATG18
0.0420001	5.24158e-17			222	YFR022W	ROG3
0.00139952	2.14186e-09			1163	YFR024C-A	LSB3
0.00195746	0.0872373	0.91588	0.313718	468	YFR025C	HIS2
0.398053	0.410767	1.16999e-21	9.14553e-08	586	YFR026C	ULI1
0.447323	0.0613602	7.73342e-16	0.924205	204	YFR027W	ECO1
0.164391	2.29303e-27			470	YFR028C	CDC14
6.41281e-12	0.142833			236	YFR029W	PTR3
0.0414185	0.0592222	1.31368e-09	0.00609275	1796	YFR030W	MET10
0.102826	2.50705e-08	2.50233e-08	1	511	YFR031C	SMC2
0.010495	0.0212516	6.94939e-18	9.48355e-13	13966	YFR031C-A	RPL2A
0.00249836	0.0376912	0.00397297	1.74272e-15	9872	YFR032C-A	RPL29
6.37995e-09	2.19274e-13	1	1	263	YFR032C-B	YFR032C-B
0.00410815	0.106899	0.00954639	1.37073e-23	3745	YFR033C	QCR6
0.0353013	0.0376569	0.0761293	1	277	YFR034C	PHO4
0.0438874	0.0241371	2.91476e-10	0.495798	1384	YFR034W-A	YFR034W-A
6.76492e-08	2.41971e-09	1	1	352	YFR036W	CDC26
6.17624e-40	0.0196733	0.9712	0.678647	1023	YFR037C	RSC8
0.0530667	0.0226455	0.0329078	1	382	YFR038W	IRC5
0.0580956	1.34675e-07	7.90651e-10	1	936	YFR039C	OSW7
0.0133442	0.0329562	0.501835	1	303	YFR040W	SAP155
0.0356121	6.0372e-09	4.11164e-08	1	1291	YFR041C	ERJ5
0.091519	0.0348301	9.74974e-22	0.227224	1177	YFR042W	KEG1
8.24742e-08	0.0192682	1	1	286	YFR043C	IRC6
0.0310629	0.028044	1.0657e-15	0.00532254	3128	YFR044C	DUG1
0.0308232	0.100468	0.188128		312	YFR045W	YFR045W
0.0464988	0.0748146	0.056375	0.701253	271	YFR046C	CNN1
0.00712873	0.0284457	0.00244884	0.0534789	2259	YFR047C	BNA6
3.03929e-38	0.0629332			332	YFR048W	RMD8
0.00814075	0.0467316	0.0948498	0.0655719	1386	YFR049W	YMR31
0.0334608	3.0438e-05			4601	YFR050C	PRE4
0.0257638	0.0129917	5.62253e-10	0.567959	2054	YFR051C	RET2
0.00789979	2.47408e-88			2939	YFR052W	RPN12
0.041265	0.443189	0.0040021	1.02676e-10	818	YFR052C-A	YFR052C-A
0.0544833	0.36458	1.1546e-11	2.11884e-38	3988	YFR053C	HXK1
1.48735e-09	0.174239	1	1.80382e-06	1171	YFR055W	IRC7
0.0383122	0.0340926	8.06414e-06	0.50637	827	YGL257C	MNT2
0.018229	1.14276e-08	0.0346922	1	626	YGL256W	ADH4
0.0889291	0.273476	5.18326e-13	4.04566e-10	2181	YGL255W	ZRT1
1.04009e-09	2.41404e-06		1	135	YGL254W	FZF1
0.0681577	0.0835699	6.86282e-67	3.25711e-40	8705	YGL253W	HXK2
0.00740086	0.0429785	0.0885525	0.0955833	1360	YGL252C	RTG2
0.0117209	7.55753e-08	0.791061	1	136	YGL251C	HFM1
0.103089	0.0168142	4.83928e-06	1	414	YGL250W	RMR1
0.0239498	0.0720142	0.00616982	0.00310789	1309	YGL248W	PDE1
2.48694e-08	3.22111e-06	1	1	346	YGL247W	BRR6
0.0342164	0.0304346			619	YGL246C	RAI1
0.0191242	0.00469759	1.42602e-17	0.620552	5469	YGL245W	GUS1
0.00205506	0.0519443	0.849453	0.540772	557	YGL244W	RTF1
0.012504	0.0320452			436	YGL243W	TAD1
0.0254686	1.66116e-09	0.000546874	1	1389	YGL242C	YGL242C
2.33781e-75	0.12654	1		292	YGL241W	KAP114
0.0248453	0.0472098			1035	YGL238W	CSE1
0.0223579	0.108273			353	YGL237C	HAP2
0.00418987	0.0829083		1	133	YGL236C	MTO1
0.00930443	6.6802e-07			2163	YGL234W	ADE5,7
0.00655946	1.24184e-05		1	553	YGL233W	SEC15
6.68614e-10	1.76761e-14			720	YGL232W	TAN1
1.97375e-09	3.41492e-10	1		1023	YGL231C	EMC4
0.158206	0.175975	0.000249298	0.458699	187	YGL229C	SAP4
0.00408632	0.0288303			1329	YGL228W	SHE10
4.45104e-19	0.111578			377	YGL227W	VID30
0.0368183	1.07083e-06			2767	YGL226C-A	OST5
0.040006	2.01383e-05			633	YGL226W	MTC3
0.396264	0.00608952	6.20398e-258	0.603973	4872	YGL225W	VRG4
0.00151618	0.036875	0.899448	0.518079	808	YGL224C	SDT1
9.54182e-10	0.551842	1	0.000183378	236	YGL223C	COG1
1.15808e-09	7.2077e-09	1	1	415	YGL222C	EDC1
0.00245766	0.0139577			1510	YGL221C	NIF3
0.00641356	0.0047022	0.00197373		2584	YGL220W	BOL2
0.013923	0.0249529	0.268427	0.786735	680	YGL219C	MDM34
0.159325	0.0502857	6.25256e-06	1	218	YGL216W	KIP3
1.01205e-24	0.0292473	1	0.209348	1602	YGL215W	CLG1
0.0078415	7.75022e-08	0.220177	1	688	YGL213C	SKI8
0.0206519	1.59225e-05	0.100584		569	YGL211W	NCS6
0.0182223	0.0363361			1141	YGL210W	YPT32
0.0417601	0.0575824	5.72538e-09	0.0358093	1644	YGL209W	MIG2
1.83604e-09	2.35897e-10	1	1	238	YGL208W	SIP2
0.0845735	1.65963e-09			1493	YGL207W	SPT16
0.000930496	6.2688e-06			968	YGL206C	CHC1
1.27777e-12	0.128972	1	0.774849	189	YGL205W	POX1
0.0761132	6.8125e-08	0.00218327	1	209	YGL204C	YGL204C
0.000577523	0.0310191	1	0.653242	766	YGL203C	KEX1
0.0125959	0.017024	8.94534e-08	0.0319106	4502	YGL202W	ARO8
0.270378	0.10854	5.76651e-08	0.369589	350	YGL201C	MCM6
0.0750552	0.0159366	1.13385e-80	0.000265143	7925	YGL200C	EMP24
0.00539948	3.82194e-07	0.179794	1	1468	YGL198W	YIP4
0.0110217	0.0907723	0.532148	0.584438	312	YGL197W	MDS3
6.90555e-10	1.61422e-12			1148	YGL196W	DSD1
0.0095793	7.91907e-34			709	YGL195W	GCN1
0.0210997	0.0911162	0.0111038	0.028514	856	YGL194C-A	YGL194C-A
1.08893e-244	7.48792e-77			205	YGL194C	HOS2
0.0131222	1.15006e-06	0.362684		376	YGL193C	YGL193C
0.00337848	0.0660667	3.8513e-05	4.97499e-41	9345	YGL191W	COX13
0.0050267	0.00390712	0.441788	1	881	YGL190C	CDC55
0.00350782	0.0178347	4.1012e-06	3.0347e-09	13411	YGL189C	RPS26A
0.0082695	0.0475282	5.27099e-05	1.94966e-15	6413	YGL187C	COX4
0.0178114	0.0244569	9.69152e-05	0.370613	1363	YGL186C	TPN1
0.0117584	0.0714133	0.415026	0.529812	417	YGL185C	YGL185C
0.102166	0.0741986	0.000607273	0.764604	281	YGL184C	STR3
0.00826089	1.19511e-12	0.172092	1	820	YGL181W	GTS1
0.00848053	0.434853	0.817473		138	YGL180W	ATG1
0.0684173	0.200774	2.83797e-05	0.00181629	524	YGL179C	TOS3
0.0021698	0.0503158	0.938322	0.711756	435	YGL178W	MPT5
0.000826222	8.21325e-06	1	1	247	YGL176C	YGL176C
0.067104	2.66369e-15			186	YGL174W	BUD13
0.0265265	0.0307426			985	YGL173C	XRN1
0.00382326	5.89733e-80	0.84642	1	545	YGL172W	NUP49
0.0917536	5.34329e-15			320	YGL171W	ROK1
4.80311e-09	0.150547			614	YGL169W	SUA5
0.0186289	0.0240461	0.000766336	0.58244	1051	YGL167C	PMR1
0.0520468	2.69984e-05			453	YGL166W	CUP2
0.045359	0.000366255			501	YGL164C	YRB30
0.0859206	1.22334e-27			209	YGL163C	RAD54
0.0125372	8.48655e-06			1333	YGL161C	YIP5
2.36656e-09	0.000186867	1		452	YGL160W	AIM14
0.0207461	0.00604077	0.039299		489	YGL159W	YGL159W
0.000221111	0.0686926	1	4.54271e-07	2482	YGL157W	ARI1
0.0656811	0.0395405	3.69853e-05	0.497711	804	YGL156W	AMS1
0.00726426	0.0898451	0.399924	0.284229	486	YGL155W	CDC43
2.76158e-25	2.06994e-08	1	1	500	YGL154C	LYS5
0.039234	0.0847071	0.00345454	0.132745	613	YGL153W	PEX14
1.20622e-105	0.141493	0.736547	0.233651	305	YGL151W	NUT1
1.275e-08	0.0656289	1	0.439774	610	YGL150C	INO80
0.000231696	0.0305917	1	0.00961161	2646	YGL148W	ARO2
0.0233328	0.064093	6.23288e-43	3.35177e-66	18796	YGL147C	RPL9A
0.0223256	3.13659e-05			449	YGL145W	TIP20
1.56332e-42	1.86953e-39			237	YGL144C	ROG1
1.88498e-09	0.0715078	1	0.533082	439	YGL143C	MRF1
0.0227287	1.07444e-05			508	YGL142C	GPI10
0.0309951	0.112585	0.0202465	0.125467	434	YGL141W	HUL5
0.0197578	4.58461e-20	0.211506	1	616	YGL140C	YGL140C
0.0732704	0.0379818			337	YGL139W	FLC3
0.0200951	1.0571e-07			2514	YGL137W	SEC27
0.0115373	0.106155	0.442516	0.15828	466	YGL136C	MRM2
0.0117022	0.0221906	1.10209e-31	2.49525e-20	19922	YGL135W	RPL1B
0.00256961	2.67234e-09			385	YGL134W	PCL10
0.00431945	4.63547e-07	0.702217	1	443	YGL133W	ITC1
5.21561e-28	0.108578		1	161	YGL131C	SNT2
0.000513882	0.048711	1	0.680875	579	YGL130W	CEG1
1.18209e-14	0.000162234			197	YGL129C	RSM23
0.0627932	0.0299949	0.000919008	1	350	YGL128C	CWC23
0.0558826	0.041186	2.68679e-14	0.158983	1271	YGL127C	SOH1
0.0646225	0.131381	3.26919e-12	2.80623e-05	1074	YGL126W	SCS3
1.80569e-14	0.344159	1	0.0207574	221	YGL125W	MET13
1.02866e-09	0.648429	1	0.00481243	159	YGL124C	MON1
0.0116036	0.0172926	4.28104e-47	1.09624e-30	35548	YGL123W	RPS2
2.10875e-11	0.0437927			994	YGL122C	NAB2
0.161893	0.130511	9.40816e-49	2.56089e-16	2710	YGL121C	GPG1
0.000424571	1.83938e-08	1	1	833	YGL120C	PRP43
0.0235825	0.0113707	0.0561151		410	YGL119W	COQ8
0.0462343	0.11273	1.53098e-05	0.0165689	727	YGL117W	YGL117W
1.55805	0.0113853	9.234e-46	1	398	YGL116W	CDC20
9.91421e-10	1.82936e-15	1	1	1686	YGL115W	SNF4
1.38908e-09	0.0447981	1	0.785047	458	YGL114W	YGL114W
0.0127952	6.08575e-14			294	YGL113W	SLD3
0.00398285	0.0107348	0.606518	1	577	YGL112C	TAF6
0.0176545	1.20214e-05			546	YGL111W	NSA1
1.18835e-17	0.0806063	1	0.374404	418	YGL110C	CUE3
2.4721e-10	4.53091e-08	1	1	182	YGL108C	YGL108C
5.22332e-32	6.24611e-34			403	YGL107C	RMD9
0.00152708	0.0149006		0.556606	1899	YGL106W	MLC1
0.00784235	0.00975164	2.3959e-06	0.185129	4657	YGL105W	ARC1
5.56534e-07	0.0909326	1	0.284127	463	YGL104C	VPS73
0.00385943	0.0187582	2.02011e-10	5.02222e-25	29110	YGL103W	RPL28
0.159647	0.0550282	2.26837e-19	0.332305	631	YGL101W	YGL101W
0.0326984	8.69216e-09	3.07179e-10	1	1730	YGL100W	SEH1
0.0871401	0.0498307	5.13533e-06	0.619605	486	YGL099W	LSG1
1.1412e-128	3.51041e-13			219	YGL098W	USE1
0.0302657	0.0204397	0.00247834	0.937974	634	YGL097W	SRM1
0.0756703	3.97274e-08	2.63908e-07	1	670	YGL096W	TOS8
0.0630729	5.421e-10	5.48104e-07	1	944	YGL095C	VPS45
0.0908774	0.0276661			406	YGL094C	PAN2
0.21258	4.08127e-93			299	YGL093W	SPC105
0.0349796	0.0267173	0.000942493	0.908729	514	YGL092W	NUP145
0.0125544	0.0322341	0.0625847	0.660656	652	YGL091C	NBP35
0.0300627	0.0672543	0.368897	0.919547	208	YGL090W	LIF1
3.02978e-17	4.43173e-11			176	YGL088W	YGL088W
0.00491134	0.0236346	0.0500447	0.25093	1854	YGL087C	MMS2
0.0133135	1.96459e-14			533	YGL086W	MAD1
0.003423	0.0173828		1	501	YGL085W	LCL3
0.0281878	6.56691e-06			369	YGL084C	GUP1
4.87715e-07	0.244097		0.239282	181	YGL083W	SCY1
0.00665735	0.0394434	0.254159	0.488351	947	YGL082W	YGL082W
0.00702194	0.0271773	0.0112363	0.271869	1637	YGL080W	MPC1
1.12161e-18	2.3813e-07			434	YGL079W	KXD1
0.0729464	0.0236863	7.33605e-13	0.659325	1100	YGL078C	DBP3
0.0046832	0.0159364	0.00289554	0.0687755	4056	YGL077C	HNM1
0.00890155	0.021739	1.12918e-20	5.02858e-24	20460	YGL076C	RPL7A
0.168757	0.125904		0.730339	159	YGL075C	MPS2
1.59277e-09	0.0460884	1	0.515803	601	YGL073W	HSF1
0.0456818	0.0259663	0.000133077	0.876069	591	YGL072C	YGL072C
0.0019506	0.0272887	0.63694	0.481858	1105	YGL071W	AFT1
0.0109671	0.0230172	0.0654371	0.604694	1072	YGL070C	RPB9
3.92542e-12	0.0494612	1	0.0143133	1628	YGL068W	MNP1
0.00316957	0.0331275	0.758053	0.746264	647	YGL067W	NPY1
2.36466e-21	0.108748	1	0.238522	429	YGL066W	SGF73
0.0934449	0.00132432			587	YGL065C	ALG2
1.15908e-09	0.120652	1	1	152	YGL064C	MRH4
0.00423311	7.44198e-07			3071	YGL062W	PYC1
0.35801	5.53555e-08	5.52364e-13	1	266	YGL061C	DUO1
0.0220577	0.0262494	0.272166	1	243	YGL060W	YBP2
0.0610992	0.0977336			366	YGL059W	PKP2
0.00472442	0.0179292	0.164709	0.479139	1707	YGL058W	RAD6
0.0015781	1.0489e-06	1	1	301	YGL057C	GEP7
0.0239386	8.1731e-06	0.00913305	1	742	YGL056C	SDS23
0.078863	0.186673	2.2948e-55	1.21507e-70	9920	YGL055W	OLE1
0.00708814	4.15345e-08	0.000109494	1	4419	YGL054C	ERV14
0.0181551	2.24128	0.0512058	4.60642e-52	491	YGL053W	PRM8
0.00478883	7.82458e-10	0.448873	1	695	YGL050W	TYW3
0.00192834	0.0607397	0.929411	0.597756	468	YGL049C	TIF4632
0.00171119	1.75322e-07			2556	YGL048C	RPT6
0.0137151	0.0537185	0.314947	0.521833	571	YGL047W	ALG13
0.00299642	3.42594e-06	0.693561	1	667	YGL045W	RIM8
7.88391e-09	3.20353e-06			334	YGL044C	RNA15
0.00428455	0.0239587	0.424684	0.685963	957	YGL043W	DST1
1.13699e-07	0.0721708			500	YGL041W-A	YGL041W-A
1.02635e-38	0.0113064	1		898	YGL040C	HEM2
0.0183629	4.89287e-07			636	YGL039W	YGL039W
0.0686915	0.0613192	2.65867e-07	0.13411	944	YGL038C	OCH1
0.0488603	0.0538195	1.43264e-31	9.52351e-14	7583	YGL037C	PNC1
0.0381451	0.0182136	0.122201	1	193	YGL036W	YGL036W
1.01764	0.490466	3.83686e-216	9.91425e-97	5704	YGL032C	AGA2
0.0101961	0.0294008	1.6584e-29	8.42172e-37	22310	YGL031C	RPL24A
0.00768574	0.0216061	2.74027e-21	3.16944e-32	28473	YGL030W	RPL30
0.0357778	5.71564e-05			270	YGL029W	CGR1
2.6987	5.80631e-09	0	1	2822	YGL028C	SCW11
0.189303	0.0618135	4.52605e-25	0.165741	847	YGL027C	CWH41
9.27906e-10	0.0158424	1	0.120334	3594	YGL026C	TRP5
0.00336417	1.82553e-05	0.966512	1	217	YGL025C	PGD1
4.83522e-10	0.0931914			546	YGL023C	PIB2
0.044999	0.0141792	8.82832e-16	0.360226	2612	YGL022W	STT3
1.27006	6.47157e-05	4.67525e-151	1	708	YGL021W	ALK1
0.00364302	0.0308045			1688	YGL020C	GET1
0.0101759	0.0258611	0.0594552	0.270677	1516	YGL019W	CKB1
8.83586e-12	0.105126	1	0.831158	209	YGL018C	JAC1
3.58253e-49	0.0205142			348	YGL017W	ATE1
3.00065e-09	0.143505	1	0.813253	155	YGL016W	KAP122
0.028104	0.351671	0.105084		342	YGL014W	PUF4
1.93775e-07	0.0929354	1		298	YGL013C	PDR1
0.0671568	0.015373	2.04981e-27	0.233358	3379	YGL012W	ERG4
0.00570694	0.0080344	0.00288937	0.456931	4114	YGL011C	SCL1
0.00619107	1.66961e-06	0.465903	1	578	YGL010W	MPO1
0.0047581	0.0263569	0.163917	0.282045	1727	YGL009C	LEU1
0.115679	0.0267852	1.45656e-288	9.05739e-36	38252	YGL008C	PMA1
0.021689	0.105611	0.0381965	0.104518	549	YGL006W-A	YGL006W-A
0.002418	1.28375e-08	0.881092	1	747	YGL006W	PMC1
1.99553e-09	0.0296561	1	0.601746	957	YGL005C	COG7
0.0150628	0.0630125	0.333999	0.541858	426	YGL004C	RPN14
0.0080097	5.50654e-06			350	YGL003C	CDH1
0.00154871	3.41934e-07			1181	YGL002W	ERP6
0.0210917	0.0170034	4.0606e-09	0.351725	2036	YGL001C	ERG26
0.0433429	0.0189293	9.07714e-15	0.430887	1667	YGR001C	EFM5
0.00260507	2.09663e-08			356	YGR002C	SWC4
0.015832	6.78493e-06	0.450553	1	226	YGR003W	CUL3
9.92077e-12	1.14246e-07			442	YGR004W	PEX31
0.00250473	0.00361219	0.653864	1	883	YGR005C	TFG2
1.66094e-17	2.63697e-13			1294	YGR007W	ECT1
0.0207702	0.11112	8.33867e-05	1.05054e-24	6159	YGR008C	STF2
2.79728e-50	1.12561e-19	1		711	YGR009C	SEC9
0.0294669	0.0182081	0.358727	1	133	YGR010W	NMA2
0.0137464	5.4808e-05		1	435	YGR011W	YGR011W
0.0033629	0.100271	0.883983	0.137531	524	YGR012W	MCY1
0.0231822	0.0602559	0.0231267	0.464825	529	YGR013W	SNU71
0.516697	0.00291026	8.38818e-50	1	744	YGR014W	MSB2
0.0307339	1.08399e-06			387	YGR015C	YGR015C
0.0136015	1.52505e-05			1243	YGR017W	YGR017W
0.0815649	0.0876833	1.49745e-26	2.34157e-12	3181	YGR019W	UGA1
0.00797898	0.00515645		0.604344	4680	YGR020C	VMA7
1.31956e-09	1.02041e-12			438	YGR021W	YGR021W
0.206742	1.92001e-20			335	YGR023W	MTL1
9.23982e-10	1.8563e-10			810	YGR024C	THG1
0.0495957	0.175812	0.0484202	0.30337	210	YGR025W	YGR025W
0.0111856	0.0112178		0.497711	2416	YGR026W	YGR026W
0.00288387	0.0201937	2.51859e-08	5.39659e-22	24305	YGR027C	RPS25A
0.0319316	0.0487154			1326	YGR028W	MSP1
0.0269518	0.0683201	0.0153396	0.399147	526	YGR029W	ERV1
1.83791e-09	2.6916e-09	1	1	262	YGR030C	POP6
8.98528e-07	2.20602e-05	1	1	277	YGR031W	IMO32
0.0632241	0.0698102	3.55174e-30	2.13841e-08	2848	YGR032W	GSC2
0.00384759	0.0106775	0.474155	0.929502	1241	YGR033C	TIM21
0.00673228	0.0319473	9.90685e-15	3.43638e-28	18045	YGR034W	RPL26B
0.00714989	0.173512	0.827789	0.403415	192	YGR036C	CAX4
0.0356	0.056727	5.95463e-68	7.53526e-40	13511	YGR037C	ACB1
0.00478001	0.0666189	0.288433	0.0616996	1010	YGR038W	ORM1
0.0542982	6.20327e-05	0.00166163	1	296	YGR040W	KSS1
0.629002	0.0218722	1.15178e-63	1	401	YGR041W	BUD9
0.0110424	0.0140261	0.379668	1	468	YGR042W	MTE1
0.414029	0.441754	1.9556e-17	0.000301676	649	YGR043C	NQM1
0.488677	1.31772e-07	5.61849e-97	1	932	YGR044C	RME1
0.0135616	6.66018e-07	0.206508	1	516	YGR046W	TAM41
0.00936793	8.04619e-05	0.506475	1	371	YGR047C	TFC4
0.0498684	0.0329792			841	YGR048W	UFD1
2.93128e-09	0.636733	1	2.12159e-51	1338	YGR049W	SCM4
0.0324862	0.064003	0.139292	0.932608	235	YGR050C	YGR050C
0.459302	0.555386	1.72611e-09	0.00358801	205	YGR052W	FMP48
0.01009	0.0201826			1482	YGR054W	YGR054W
0.136372	0.208901	0.000943395	0.321675	259	YGR055W	MUP1
0.00353667	0.0524218		0.919547	253	YGR056W	RSC1
9.91442e-08	0.0939854	1	0.486683	366	YGR057C	LST7
0.00962352	9.28999e-06		1	250	YGR058W	PEF1
0.00569314	0.0589514	1.72507e-07	3.48187e-36	12441	YGR060W	ERG25
0.00722885	0.0959146	0.200568	0.00353605	1063	YGR061C	ADE6
0.0354543	0.0622114	0.0109006	0.481858	520	YGR062C	COX18
0.0102603	6.94658e-06	0.0161137	1	1232	YGR063C	SPT4
0.0324603	0.0330483	2.67966e-28	4.16785e-09	7464	YGR065C	VHT1
0.153569	0.114573	2.14449e-05	0.559304	248	YGR070W	ROM1
1.27937e-166	1.68449e-71			205	YGR071C	ENV11
2.36968e-15	0.0139219	1	1	506	YGR072W	UPF3
0.00641367	0.00789828			250	YGR073C	YGR073C
0.0172007	0.025615	0.0160725	0.458817	1084	YGR074W	SMD1
0.00680386	0.0190605	0.430033	1	472	YGR076C	MRPL25
0.00335528	0.0474576	0.69127	0.406487	731	YGR077C	PEX8
0.00291451	2.63787e-09	0.747943	1	773	YGR078C	PAC10
0.100712	0.240239	0.0145489	0.129712	239	YGR079W	YGR079W
0.0332728	0.0373596	3.1545e-07	0.0930164	1609	YGR080W	TWF1
0.00985872	1.96207e-07	0.461179	1	328	YGR081C	SLX9
0.00374059	1.93181e-05	0.25145	1	2559	YGR082W	TOM20
9.93869e-10	1.74318e-10	1	1	692	YGR083C	GCD2
8.66687e-09	2.40771e-08			640	YGR084C	MRP13
0.0162185	0.0172857	2.30961e-25	3.95303e-08	12112	YGR085C	RPL11B
0.122975	0.0414146	3.22749e-195	2.37543e-25	13721	YGR086C	PIL1
0.58279	0.465133	1.20631e-73	5.45388e-19	1902	YGR088W	CTT1
0.0054855	0.0751297		0.674625	296	YGR089W	NNF2
0.0281603	0.0608978	0.215435	0.777278	322	YGR090W	UTP22
2.40459e-93	0.501585	1	0.101977	140	YGR091W	PRP31
0.510566	0.0253501	4.5328e-35	0.893865	567	YGR092W	DBF2
5.77882e-09	1.323e-06	1	1	361	YGR093W	DRN1
2.21111e-17	0.00679237			2610	YGR094W	VAS1
0.00423502	2.16036e-06			652	YGR095C	RRP46
0.0171886	1.51708e-08	0.287259	1	301	YGR097W	ASK10
0.420377	5.27281e-42			187	YGR098C	ESP1
0.15349	6.03948e-07		1	339	YGR099W	TEL2
0.00912419	3.37327e-76	0.498298		478	YGR100W	MDR1
1.28605e-32	2.32175e-09			532	YGR101W	PCP1
1.6482e-07	2.56902e-07			854	YGR102C	GTF1
0.0763446	0.0348067	1.84111e-11	0.354931	1063	YGR103W	NOP7
4.54768e-61	5.21038e-09			440	YGR104C	SRB5
2.75475e-09	9.44656e-10			1722	YGR105W	VMA21
0.00551785	1.65022e-09			3067	YGR106C	VOA1
1.36749	0.0963646	1.01387e-183	0.015442	1040	YGR108W	CLB1
0.000577929	0.0193378	0.963913	0.638939	1188	YGR111W	YGR111W
3.15148e-66	0.0496131	1		419	YGR112W	SHY1
0.140046	3.20645e-07	1.17154e-16	1	661	YGR113W	DAM1
0.0129399	1.87053e-05	0.0374385	1	1241	YGR116W	SPT6
2.20884e-20	1.30679e-08	1	1	563	YGR117C	YGR117C
0.00387413	0.0142042	1.87019e-10	1.20438e-18	26214	YGR118W	RPS23A
0.0289526	6.62571e-14			416	YGR119C	NUP57
7.83867e-94	0.10792	1		323	YGR120C	COG2
0.034975	0.0784536	0.000363057	0.0668208	828	YGR121C	MEP1
0.0378151	0.0120706	0.0268376	1	359	YGR122W	YGR122W
0.00542899	1.70914e-07			475	YGR123C	PPT1
4.08731e-42	0.0255209			2482	YGR124W	ASN2
0.00662558	0.0457701	0.227245	0.252864	932	YGR125W	YGR125W
0.0137224	5.50737e-06			653	YGR127W	YGR127W
0.054779	1.63156e-07			473	YGR128C	UTP8
0.084043	0.0213399	4.12278e-18	0.492278	1348	YGR130C	YGR130C
0.0110678	0.0148918	0.000361755		2501	YGR132C	PHB1
0.00693407	6.88736e-08	0.438391	1	452	YGR133W	PEX4
0.00547071	5.42499e-10			195	YGR134W	CAF130
0.0247036	0.0164089	4.80385e-19	0.0574135	4062	YGR135W	PRE9
0.0124627	0.0125988	0.0612724	0.983826	931	YGR137W	YGR137W
0.0165368	0.0512645	3.48128e-05	0.000161342	2631	YGR138C	TPO2
0.496977	1.01025e-09			170	YGR140W	CBF2
0.113146	7.61711e-30	1.097e-10		702	YGR141W	VPS62
0.0142613	0.0829913	0.386728	0.612117	365	YGR142W	BTN2
1.04922	0.121828	3.53714e-16	0.358585	291	YGR143W	SKN1
4.34097e-09	0.764262	1	7.73783e-23	1393	YGR144W	THI4
0.0843477	0.116968	0.00113588	0.289834	343	YGR145W	ENP2
0.197189	0.104811	1.01591e-34	0.000108948	1363	YGR146C	ECL1
0.00539586	2.07049e-05	0.367997		642	YGR147C	NAT2
0.00694697	0.0269906	7.34746e-14	3.14115e-29	18128	YGR148C	RPL24B
0.214691	7.81086e-07			1625	YGR149W	GPC1
1.46347e-86	7.30526e-08			307	YGR150C	CCM1
0.399066	0.0376483	5.72969e-35	0.699339	536	YGR152C	RSR1
0.00931068	0.207883	0.639235	0.0554382	314	YGR154C	GTO1
0.0211862	0.0138249	5.11977e-16	0.168161	4458	YGR155W	CYS4
2.56869e-09	0.136384	1	0.393379	290	YGR156W	PTI1
0.00109758	0.00911954	0.210696	0.128883	6146	YGR157W	CHO2
0.00295393	2.21134e-08	0.680001	1	714	YGR158C	MTR3
0.119081	0.0971442	2.15715e-28	8.14388e-07	2078	YGR159C	NSR1
0.0395464	0.0598002	3.00169e-06	0.13143	1066	YGR161C	RTS3
0.0258572	1.72479e-08	0.000819075	1	980	YGR162W	TIF4631
0.00226392	8.9623e-07			1134	YGR163W	GTR2
0.000387824	2.10659e-08	1	1	293	YGR165W	MRPS35
0.000710077	6.18891e-12	1	1	378	YGR166W	TRS65
0.00273157	0.00412457	0.105926	0.832886	4030	YGR167W	CLC1
0.115374	5.45513e-08			428	YGR168C	YGR168C
0.0157789	3.58473e-37	0.414069		225	YGR169C	PUS6
0.00050996	5.24147e-06			1089	YGR169C-A	LSO2
3.48488e-23	6.06162e-06	1		521	YGR170W	PSD2
3.88677e-307	0.149002			240	YGR171C	MSM1
0.0074295	0.0379916		0.00977316	2067	YGR172C	YIP1
0.0291125	0.0333141		0.367261	1009	YGR173W	RBG2
0.0038287	0.0787289	0.905287	0.528022	384	YGR174C	CBP4
0.00551599	0.0190179	9.855e-05	0.00389292	5098	YGR175C	ERG1
0.00301306	4.15536e-08		1	168	YGR177C	ATF2
1.38629e-09	0.0480119			1123	YGR178C	PBP1
0.157127	0.020954	9.06174e-05	1	207	YGR179C	OKP1
0.00234076	0.0705198	0.0198709	1.727e-23	6397	YGR180C	RNR4
0.0069612	1.5238e-06	0.128051	1	1293	YGR181W	TIM13
0.00724047	0.05524	2.00358e-05	2.50888e-11	4891	YGR183C	QCR9
0.00424739	2.98876e-06		1	413	YGR184C	UBR1
0.00604232	0.0183806	2.62196e-05	0.0178219	4512	YGR185C	TYS1
0.00174044	2.15481e-06	0.913648	1	758	YGR186W	TFG1
0.0557292	0.0963087		0.0852704	591	YGR187C	HGH1
0.59581	0.286728	3.27026e-15	0.116336	185	YGR188C	BUB1
0.353685	0.107772	2.95895e-172	2.39637e-22	8646	YGR189C	CRH1
0.0302042	0.014904	0.000453147	0.83739	1027	YGR191W	HIP1
0.00312106	0.0106197	5.21329e-59	1.23308e-97	234719	YGR192C	TDH3
3.30345e-19	1.10849e-05			1055	YGR193C	PDX1
0.0322574	0.0464405			305	YGR194C	XKS1
0.0161039	1.10759e-05			661	YGR195W	SKI6
7.06154e-09	1.76884e-13	1	1	372	YGR196C	FYV8
1.23704e-11	0.0816245	1	0.789452	276	YGR197C	SNG1
0.000142933	8.37824e-07	1		654	YGR198W	YPP1
0.0064139	0.0405287	0.454795	0.69421	512	YGR199W	PMT6
0.00772638	0.0381822		0.748199	516	YGR200C	ELP2
0.0524405	1.58092e-05			399	YGR201C	YGR201C
0.0194252	0.0958418	0.0885253	0.129712	556	YGR202C	PCT1
7.65746e-10	8.4858e-16	1	1	707	YGR203W	YCH1
0.00644312	0.0288629	0.00137341	0.00737558	3098	YGR204W	ADE3
0.116732	0.213743	0.000591041	0.00843429	381	YGR205W	TDA10
0.0499852	0.0240292	0.0068537	1	432	YGR206W	MVB12
0.00119802	0.0229172	0.742094	0.343081	1509	YGR207C	CIR1
0.00387311	0.0263812			771	YGR208W	SER2
0.0019805	0.035239	0.0120204	2.45695e-13	10617	YGR209C	TRX2
0.002131	1.46092e-06	0.708689	1	855	YGR210C	YGR210C
0.0506272	0.0649645	1.14902e-05	0.204817	746	YGR211W	ZPR1
0.0141512	0.02136	2.72994e-27	7.71056e-11	10885	YGR214W	RPS0A
2.29504e-09	0.0716573	1	0.284229	636	YGR215W	RSM27
3.94262e-07	0.000109486	1		459	YGR216C	GPI1
0.0546731	0.0961881	0.0210244	0.667494	238	YGR217W	CCH1
6.67442e-15	0.00307053			664	YGR218W	CRM1
1.01365e-08	0.0233882			1074	YGR220C	MRPL9
1.20864	0.0455468	8.04278e-67	0.818525	283	YGR221C	TOS2
0.147951	1.87775e-05	3.77922e-12	1	691	YGR222W	PET54
0.0131885	0.063469	0.398941	0.927317	253	YGR223C	HSV2
0.0208506	0.0735642	0.309431	0.712105	280	YGR227W	DIE2
0.0478127	0.0286603	0.000150045		887	YGR229C	SMI1
0.529701	0.0716948	9.4499e-12	1	153	YGR230W	BNS1
0.00305492	4.07129e-09	0.555227	1	1391	YGR231C	PHB2
0.00760554	2.37447e-07			1177	YGR232W	NAS6
0.0239776	0.0331763	0.264094	1	333	YGR233C	PHO81
0.176113	1.11599	4.86524e-114	1.63737e-307	10671	YGR234W	YHB1
3.46337e-12	0.0118979			1486	YGR235C	MIC26
0.0966066	0.102258			368	YGR237C	YGR237C
0.0257963	1.74825e-08	0.465804	1	330	YGR238C	KEL2
2.68397e-09	0.102141	1	0.317783	439	YGR239C	PEX21
0.0179287	0.0158869	2.07132e-10	0.117112	3526	YGR240C	PFK1
0.00296448	2.59271e-06	0.884868	1	402	YGR241C	YAP1802
3.90687e-09	0.182447	1	0.00129655	719	YGR243W	MPC3
0.00425849	0.0383409	0.138021	0.000203875	3421	YGR244C	LSC2
0.0747789	0.0394469	0.000430093	0.74403	475	YGR245C	SDA1
0.0262998	6.23163e-07	0.120429	1	612	YGR246C	BRF1
1.26024e-08	0.204866	1		181	YGR247W	CPD1
0.35537	0.495242	2.81399e-44	6.36201e-22	1214	YGR248W	SOL4
0.00879631	0.0801958	0.102373	0.0374763	864	YGR250C	RIE1
0.0343482	0.0434438	0.0393635	0.818919	410	YGR251W	NOP19
0.0416542	0.0459757	0.000956416	0.620552	518	YGR252W	GCN5
0.00757979	0.00117851	2.47006e-07	1	5471	YGR253C	PUP2
0.0103167	0.0784301	2.96001e-29	2.76258e-156	76611	YGR254W	ENO1
0.0112206	0.101034			717	YGR255C	COQ6
0.129355	0.598949	1.34789e-14	1.38572e-22	1107	YGR256W	GND2
0.00939822	1.69768e-21		1	929	YGR257C	MTM1
0.0677133	2.84596e-06	0.00864515	1	345	YGR258C	RAD2
0.010095	0.0388487	0.00338716	0.0534137	1751	YGR260W	TNA1
0.0128289	0.0863343			380	YGR261C	APL6
0.00375586	0.0250263	0.672129	0.669598	859	YGR262C	BUD32
0.00474225	0.0577861	0.875581	0.760415	331	YGR263C	SAY1
0.0288182	2.61638e-06			1738	YGR264C	MES1
0.0880626	0.139606	0.0445189		147	YGR266W	YGR266W
0.0162816	0.0167998	2.14235e-07	0.0608906	3520	YGR267C	FOL2
0.0424525	1.45988e-08	0.131279	1	233	YGR268C	HUA1
0.00300432	6.17275e-06	0.453951	1	1116	YGR270W	YTA7
0	0.00809355			195	YGR271W	SLH1
3.16348e-69	2.11602e-07	1	1	181	YGR271C-A	EFG1
0.0268782	0.119958	0.0588417	0.157701	412	YGR274C	TAF1
0.000975098	0.0934874			224	YGR275W	RTT102
0.000777992	0.0317461			772	YGR277C	CAB4
1.19534e-09	0.100224			209	YGR278W	CWC22
0.204265	0.0347232	0	4.78163e-20	15036	YGR279C	SCW4
0.0391833	0.127931	0.00292967	0.0938311	508	YGR280C	PXR1
0.00663596	0.0643206			543	YGR281W	YOR1
0.016204	0.0347026	5.09195e-54	2.01688e-70	31270	YGR282C	BGL2
0.00500216	7.13909e-08	0.807088	1	369	YGR283C	YGR283C
0.0585834	0.0246409	3.3066e-47	0.00170492	4111	YGR284C	ERV29
0.0169446	1.96954e-07			5443	YGR285C	ZUO1
0.0219341	0.0748991	1.22031e-13	2.28185e-12	4683	YGR286C	BIO2
0.0522567	0.304727	0.0340232	0.0836729	193	YGR287C	IMA1
0.0223274	1.93107	2.65903e-07	9.53588e-140	1484	YGR295C	COS6
0.0329775	1.58392	1.63124e-06	5.08798e-100	1144	YHL048W	COS8
0.0136097	2.68297	0.060444	2.69557e-129	1347	YHL047C	ARN2
0.104201	0.098148	1.14744e-39	5.06057e-12	3857	YHL040C	ARN1
0.0480737	3.37522e-15			413	YHL039W	EFM1
4.56025e-09	0.171956	1	0.282547	272	YHL038C	CBP2
0.0641589	0.0369597	0.000498309	0.876069	475	YHL036W	MUP3
0.00893449	0.080979	0.282094	0.227224	602	YHL035C	VMR1
0.019291	0.00930158	4.27978e-25	0.0997534	6237	YHL034C	SBP1
0.0152323	0.0077335	3.11121e-18	0.0683489	9473	YHL033C	RPL8A
0.019935	0.0423224	0.156634	0.724063	474	YHL032C	GUT1
0.0160427	0.0231277	0.102447	0.948265	565	YHL031C	GOS1
1.53119e-31	1.15677e-08	1	1	305	YHL030W	ECM29
0.00211063	3.0148e-06	0.867774	1	489	YHL029C	OCA5
1.25502	0.167307	9.46254e-25	0.0276535	429	YHL028W	WSC4
0.0176355	2.9173e-08	0.00385861	1	993	YHL027W	RIM101
[truncated: 2,997 more rows]

## Sheet: Table S6. Local eQTLs
Table S6: Local eQTL summary statistics for the 393 previously generated segregants. Effect size (Betas) and p-values with the ‘whole-genome’ suffix were estimated using the genotypes from whole-genome sequencing. Betas and p-value with the ‘HMM‘ suffix were estimated using the genotypes inferred using our HMM.
transcript	gene	beta (whole-genome)	p-value (whole-genome)	adjusted p-value (whole-genome)	beta (HMM)	p-value (HMM)	adjusted p-value (HMM)	significant using both genotyping methods
YAL023C	PMT2	-0.00721798	0.855537	0.938029	-0.0208659	0.666734	0.847187	0
YAL022C	FUN26	0.092279	0.381193	0.656562	0.0195232	0.883934	0.952838	0
YAL021C	CCR4	0.0404468	0.573958	0.800731	-0.0183814	0.840612	0.936328	0
YAL020C	ATS1	-0.000755419	0.994519	0.997646	-0.0353602	0.801139	0.916523	0
YAL019W	FUN30	-0.166123	0.140387	0.38567	-0.0342257	0.808244	0.919927	0
YAL017W	PSK1	-0.162286	0.149949	0.401328	-0.126132	0.357645	0.622892	0
YAL016W	TPD3	-0.04177	0.422854	0.693577	0.0259237	0.660751	0.844572	0
YAL015C	NTG1	0.0013831	0.990578	0.996679	-0.0119009	0.928854	0.972549	0
YAL014C	SYN8	0.0628554	0.286135	0.567754	0.100987	0.12949	0.355336	0
YAL013W	DEP1	0.0945775	0.291818	0.573072	0.112855	0.25805	0.523254	0
YAL012W	CYS3	0.0336627	0.366263	0.645576	0.108426	0.00675616	0.0440319	0
YAL011W	SWC3	0.0437533	0.700645	0.871554	0.10777	0.376581	0.638846	0
YAL010C	MDM10	0.125593	0.419248	0.68974	0.134182	0.416486	0.670484	0
YAL009W	SPO7	-0.059715	0.61955	0.827081	-0.0373709	0.768224	0.899963	0
YAL008W	FUN14	0.13732	0.0233345	0.121662	0.185926	0.00323416	0.0241625	0
YAL007C	ERP2	0.0176027	0.621698	0.828198	0.0206583	0.571972	0.791427	0
YAL005C	SSA1	-0.313881	5.23575e-08	1.35055e-06	-0.206574	7.4944e-05	0.000989296	1
YAL003W	EFB1	0.0830976	7.27567e-07	1.53039e-05	0.0580013	0.000722582	0.00694388	1
YAL002W	VPS8	-0.155306	0.194837	0.4674	-0.157196	0.212185	0.47119	0
YAL001C	TFC3	0.167315	0.106871	0.327973	0.273617	0.0126714	0.0704108	0
YAR002W	NUP60	-0.181087	0.0136297	0.0820454	-0.191343	0.0121261	0.0681535	0
YAR002C-A	ERP1	0.109292	0.00197542	0.017667	0.132714	0.000236515	0.00269572	1
YAR003W	SWD1	-0.227139	0.00469621	0.0362459	-0.1941	0.0203944	0.10123	0
YAR007C	RFA1	0.205345	0.0246093	0.124826	0.284585	0.00272737	0.0211836	0
YAR008W	SEN34	0.193422	0.0565858	0.218885	0.215069	0.0425826	0.171344	0
YAR014C	BUD14	-0.121923	0.130091	0.371639	-0.123083	0.164169	0.40857	0
YAR015W	ADE1	-0.260246	3.32827e-07	7.48251e-06	-0.32628	1.87836e-09	5.78983e-08	1
YAR018C	KIN3	0.0977344	0.385849	0.66081	0.0525781	0.669356	0.848577	0
YAR019C	CDC15	0.149834	0.366883	0.645777	0.120795	0.521917	0.754865	0
YAL060W	BDH1	0.599298	4.07822e-29	4.87497e-27	0.709843	4.19593e-36	7.90934e-34	1
YAL059W	ECM1	-0.0357153	0.761649	0.899473	-0.163141	0.207119	0.465852	0
YAL058W	CNE1	0.158034	0.269599	0.550544	0.108397	0.491558	0.729691	0
YAL056W	GPB2	-0.310932	0.000310435	0.00367498	-0.391866	3.642e-05	0.000545855	1
YAL055W	PEX22	-0.199699	0.0879647	0.290324	-0.332563	0.00934836	0.0559317	0
YAL054C	ACS1	-0.0585594	0.429273	0.699201	-0.126459	0.117225	0.33477	0
YAL053W	FLC2	-0.140986	0.0264584	0.131648	-0.175894	0.0103971	0.060807	0
YAL051W	OAF1	-0.0733092	0.539758	0.777293	-0.10659	0.41308	0.668727	0
YAL049C	AIM2	0.673895	2.39417e-55	6.90226e-53	0.768242	4.98622e-61	3.05468e-58	1
YAL046C	BOL3	0.157448	0.0351975	0.160767	0.328775	6.39947e-05	0.000873643	0
YAL044W-A	BOL1	-0.0115616	0.83495	0.93089	0.00160506	0.978738	0.991419	0
YAL044C	GCV3	-0.0222175	0.520201	0.765617	-0.0394729	0.276925	0.54638	0
YAL043C	PTA1	0.152716	0.158482	0.412659	0.132792	0.256346	0.520875	0
YAL042W	ERV46	-0.0489252	0.342431	0.622499	0.00968265	0.863278	0.944751	0
YAL041W	CDC24	0.0464971	0.574525	0.801066	0.133027	0.152998	0.39057	0
YAL040C	CLN3	0.156313	0.0484155	0.199231	0.324048	0.000269686	0.00301765	0
YAL039C	CYC3	-0.353727	1.60593e-07	3.74792e-06	-0.399544	1.92039e-07	4.50327e-06	1
YAL038W	CDC19	-0.0261943	0.158603	0.412659	-0.0201728	0.23988	0.503244	0
YAL037W	YAL037W	0.211716	0.132168	0.373993	0.274041	0.102242	0.306455	0
YAL036C	RBG1	-0.0438361	0.451071	0.714049	-0.0280221	0.686044	0.857511	0
YAL035W	FUN12	-0.0954764	0.0264985	0.131713	-0.12345	0.014332	0.0769343	0
YAL034W-A	MTW1	-0.202428	0.161349	0.417515	-0.0393769	0.824605	0.927568	0
YAL034C	FUN19	-0.145795	0.100001	0.315238	-0.0711818	0.513191	0.746557	0
YAL033W	POP5	-0.194964	0.0248882	0.125727	-0.294393	0.00640825	0.0420976	0
YAL032C	PRP45	0.0732122	0.518185	0.764097	0.0701986	0.615172	0.816619	0
YAL031C	GIP4	0.0955696	0.378116	0.655286	-0.00258468	0.984533	0.996074	0
YAL030W	SNC1	-0.0588903	0.138703	0.382976	-0.128743	0.00928593	0.0557725	0
YAL029C	MYO4	-0.0221071	0.84615	0.934902	0.155229	0.287686	0.555316	0
YAL028W	FRT2	-0.384643	0.000833219	0.00852528	-0.588118	5.33552e-05	0.000751419	1
YAL027W	SAW1	-0.150428	0.23246	0.509266	-0.0347648	0.827898	0.928922	0
YAL026C	DRS2	-0.156645	0.2217	0.499855	-0.066194	0.686407	0.857746	0
YAL025C	MAK16	0.11832	0.194578	0.467236	0.0285874	0.800192	0.91608	0
YBL066C	SEF1	-0.237754	0.12703	0.36536	-0.141433	0.430032	0.679244	0
YBL064C	PRX1	0.0307505	0.505929	0.754627	0.0432244	0.388081	0.648256	0
YBL063W	KIP1	-0.0366106	0.832682	0.930242	0.0392535	0.844315	0.938194	0
YBL061C	SKT5	-0.159582	0.0678603	0.247763	-0.240406	0.0161603	0.0847076	0
YBL060W	YEL1	0.0208708	0.885855	0.951149	0.0921001	0.573442	0.79236	0
YBL059C-A	CMC2	-0.104422	0.233593	0.509271	-0.176442	0.0717159	0.244083	0
YBL058W	SHP1	0.0911413	0.134436	0.377144	0.0895758	0.176663	0.426514	0
YBL057C	PTH2	-0.0197146	0.757869	0.89834	0.041192	0.549092	0.776578	0
YBL056W	PTC3	-0.0929919	0.0168789	0.0950846	-0.0933997	0.027421	0.124205	0
YBL055C	YBL055C	0.0689426	0.4859	0.741006	0.130987	0.223616	0.485022	0
YBL054W	TOD6	0.142191	0.406859	0.678698	0.174908	0.350608	0.615741	0
YBL052C	SAS3	-0.00602394	0.953076	0.98069	0.0172825	0.876908	0.949196	0
YBL051C	PIN4	0.0465335	0.567745	0.796371	0.00272299	0.974702	0.989644	0
YBL050W	SEC17	0.0128533	0.763734	0.899507	0.0221109	0.623951	0.822038	0
YBL049W	MOH1	0.335944	0.0338893	0.157134	0.412704	0.0131017	0.0722311	0
YBL048W	RRT1	0.45571	0.00174002	0.0157631	0.425935	0.00542052	0.0368972	1
YBL047C	EDE1	-0.0364412	0.587436	0.809405	-0.0667459	0.349817	0.615741	0
YBL046W	PSY4	0.106961	0.446742	0.711564	0.114434	0.432861	0.681482	0
YBL045C	COR1	0.125811	0.00978048	0.0636576	0.19586	5.36266e-05	0.000753078	0
YBL043W	ECM13	0.500353	0.000315756	0.00372	0.486305	0.000760807	0.00719829	1
YBL042C	FUI1	0.178928	0.126697	0.364832	0.210402	0.0824768	0.26805	0
YBL041W	PRE7	0.111678	0.000776634	0.00808128	0.101705	0.00300716	0.0228143	1
YBL040C	ERD2	-0.104557	0.0133258	0.081231	-0.110743	0.0087024	0.0535352	0
YBL039W-B	YBL039W-B	-0.0351922	0.683046	0.862568	0.0203688	0.819299	0.924237	0
YBL039C	URA7	0.237481	3.66074e-05	0.000567762	0.237713	7.50904e-05	0.000989296	1
YBL038W	MRPL16	0.101319	0.110553	0.334662	0.0742639	0.265158	0.53238	0
YBL037W	APL3	-0.249122	0.0477706	0.197666	-0.263183	0.0459889	0.178882	0
YBL036C	YBL036C	0.00808596	0.87942	0.94747	-0.0156306	0.779872	0.907505	0
YBL035C	POL12	0.236466	0.087968	0.290324	0.167255	0.256722	0.520992	0
YBL034C	STU1	0.26804	0.106052	0.326482	0.258685	0.144415	0.37708	0
YBL033C	RIB1	0.0926276	0.32954	0.609002	0.131734	0.189298	0.441742	0
YBL032W	HEK2	-0.105513	0.228759	0.505309	-0.0629012	0.491622	0.729691	0
YBL031W	SHE1	-0.112722	0.373233	0.651695	-0.130247	0.314949	0.583357	0
YBL030C	PET9	0.0521549	0.129825	0.371438	0.0442896	0.180145	0.430889	0
YBL029C-A	YBL029C-A	0.061756	0.27071	0.551893	0.0738821	0.201547	0.457517	0
YBL029W	YBL029W	0.330044	0.00592767	0.0431031	0.335358	0.00755828	0.0483592	1
YBL028C	YBL028C	0.199044	0.0159038	0.0911633	0.21907	0.0115676	0.0659986	0
YBL027W	RPL19B	0.0162063	0.492269	0.743714	-0.00396733	0.866206	0.944751	0
YBL026W	LSM2	-0.0108478	0.859399	0.939526	-0.0238902	0.715141	0.874041	0
YBL025W	RRN10	0.0918173	0.507073	0.75491	-0.0243018	0.869987	0.946041	0
YBL024W	NCL1	-0.0561749	0.408136	0.679369	-0.101697	0.1596	0.40148	0
YBL023C	MCM2	0.0927432	0.333952	0.614839	0.00462231	0.964073	0.986208	0
YBL022C	PIM1	-0.0306197	0.658999	0.851055	-0.0443637	0.549515	0.776578	0
YBL021C	HAP3	-0.00903937	0.928053	0.968884	-0.0179861	0.86629	0.944751	0
YBL020W	RFT1	0.0145714	0.867923	0.943371	0.0669008	0.470991	0.713989	0
YBL019W	APN2	-0.355132	0.00260079	0.0224015	-0.395492	0.00171491	0.0143917	1
YBL018C	POP8	-0.0798651	0.258322	0.538738	-0.0613427	0.414912	0.669952	0
YBL017C	PEP1	0.0999757	0.190839	0.461152	0.118575	0.144609	0.377183	0
YBL016W	FUS3	0.294665	0.0063904	0.0456394	0.393867	0.00061491	0.00601532	1
YBL015W	ACH1	-0.678541	1.10373e-13	5.20132e-12	-0.784599	1.63605e-15	9.21644e-14	1
YBL014C	RRN6	-0.247483	0.0573923	0.220958	-0.262661	0.0645452	0.228237	0
YBL011W	SCT1	0.053405	0.52501	0.768541	0.116493	0.204984	0.462954	0
YBL010C	YBL010C	0.126039	0.252978	0.533496	0.173308	0.145659	0.378914	0
YBL009W	ALK2	-0.131677	0.409184	0.679369	-0.160635	0.349635	0.615741	0
YBL008W	HIR1	0.0635003	0.594279	0.81243	0.0655167	0.60997	0.814055	0
YBL007C	SLA1	0.0311338	0.645858	0.844461	0.059906	0.412665	0.668681	0
YBL006C	LDB7	-0.0196601	0.762011	0.899473	-0.00454566	0.947716	0.980114	0
YBL004W	UTP20	-0.0393227	0.794499	0.911266	-0.0619823	0.693117	0.860699	0
YBL003C	HTA2	0.0219186	0.707257	0.874878	0.0833009	0.155818	0.395887	0
YBL002W	HTB2	-0.0269947	0.696485	0.870301	0.0577258	0.405702	0.663889	0
YBL001C	ECM15	-0.0625101	0.111774	0.336697	-0.0678028	0.0912193	0.286948	0
YBR001C	NTH2	-0.181484	0.0474363	0.197189	-0.204399	0.0303144	0.132771	0
YBR002C	RER2	0.0648911	0.343059	0.623178	0.0233654	0.740136	0.886262	0
YBR003W	COQ1	0.0427633	0.572094	0.798813	0.0245136	0.753792	0.892567	0
YBR004C	GPI18	-0.0275466	0.806484	0.916646	-0.02089	0.858727	0.944013	0
YBR005W	RCR1	-0.111154	0.236828	0.513354	-0.0806729	0.410124	0.667117	0
YBR006W	UGA2	-0.341485	2.16815e-07	4.98879e-06	-0.361612	1.00652e-07	2.47888e-06	1
YBR007C	DSF2	-0.252306	0.00804213	0.0550482	-0.254204	0.0111327	0.0643031	0
YBR008C	FLR1	0.224927	0.0138219	0.082914	0.340347	0.000453561	0.00468967	0
YBR009C	HHF1	0.00600958	0.930264	0.969705	0.0536549	0.418415	0.671684	0
YBR010W	HHT1	-0.005383	0.916062	0.96407	0.00224745	0.964937	0.986474	0
YBR011C	IPP1	-0.0130007	0.402413	0.674861	-0.0168925	0.281644	0.548905	0
YBR012C	YBR012C	-0.282899	0.0313123	0.148747	-0.336123	0.0114798	0.0657056	0
YBR013C	YBR013C	-2.19282	1.92768e-30	2.55339e-28	-2.21412	1.37062e-30	1.91925e-28	1
YBR014C	GRX7	-0.19008	0.000499533	0.00561517	-0.199127	0.000446704	0.00462854	1
YBR015C	MNN2	0.0721828	0.137596	0.381339	0.0603773	0.228264	0.490777	0
YBR016W	YBR016W	-0.0174709	0.714901	0.878569	-0.0201016	0.691187	0.860699	0
YBR017C	KAP104	-0.0923365	0.202835	0.477701	-0.0859389	0.285293	0.552865	0
YBR021W	FUR4	-0.128525	0.360964	0.640277	-0.150067	0.340065	0.606499	0
YBR022W	POA1	0.0166158	0.827906	0.928693	0.0289472	0.733887	0.883085	0
YBR023C	CHS3	-0.186362	0.0576353	0.22172	-0.162928	0.138966	0.368103	0
YBR024W	SCO2	0.0126637	0.8911	0.952054	0.0508753	0.610084	0.814055	0
YBR025C	OLA1	-0.00833928	0.782349	0.907132	0.0419535	0.196588	0.451236	0
YBR026C	ETR1	-0.451563	4.47253e-14	2.17029e-12	-0.425768	2.36814e-11	8.72652e-10	1
YBR028C	YPK3	-0.161491	0.0492739	0.201113	-0.133477	0.136296	0.36482	0
YBR029C	CDS1	0.034716	0.353755	0.635075	0.0422668	0.29348	0.560322	0
YBR030W	RKM3	-0.168169	0.0366705	0.165338	-0.070813	0.414651	0.669851	0
YBR031W	RPL4A	-0.115379	7.70597e-07	1.6071e-05	-0.165283	4.65917e-12	1.88716e-10	1
YBR033W	EDS1	0.111869	0.379366	0.655702	0.202841	0.134456	0.362469	0
YBR034C	HMT1	0.0345421	0.599636	0.815916	0.0242915	0.728296	0.880812	0
YBR035C	PDX3	0.0322418	0.445179	0.709766	0.0256067	0.569919	0.789936	0
YBR036C	CSG2	0.0354468	0.275242	0.556586	0.121259	0.000488557	0.00495524	0
YBR037C	SCO1	0.161364	0.176203	0.437916	0.23262	0.0723003	0.245051	0
YBR038W	CHS2	-0.154977	0.150276	0.401584	-0.2363	0.0435918	0.173977	0
YBR039W	ATP3	0.130315	0.000174892	0.00224972	0.097491	0.00801595	0.0506672	0
YBR041W	FAT1	0.114152	0.11796	0.34974	0.130129	0.100667	0.303455	0
YBR042C	CST26	0.027217	0.751314	0.894714	0.0366434	0.693919	0.860987	0
YBR043C	QDR3	-0.118208	0.210324	0.487269	-0.121106	0.239264	0.502838	0
YBR044C	TCM62	-0.0178818	0.865815	0.942131	0.0116058	0.918344	0.968483	0
YBR045C	GIP1	0.651532	2.02409e-07	4.67927e-06	0.73989	2.45374e-08	6.50042e-07	1
YBR046C	ZTA1	-0.00791411	0.923029	0.966731	0.00403433	0.963111	0.985974	0
YBR047W	FMP23	0.334845	0.0197641	0.106914	0.519619	0.000740415	0.00704617	0
YBR048W	RPS11B	0.0700227	0.00523654	0.0393362	0.0643611	0.00900749	0.0546358	0
YBR049C	REB1	-0.0509962	0.558418	0.79213	0.00490899	0.957405	0.984631	0
YBR052C	RFS1	-0.291238	7.15085e-10	2.32095e-08	-0.308449	4.67144e-10	1.55746e-08	1
YBR053C	YBR053C	-0.0228327	0.63475	0.837843	0.0983587	0.0494714	0.187807	0
YBR054W	YRO2	-0.0985876	0.131658	0.373268	-0.0144206	0.821779	0.925944	0
YBR055C	PRP6	0.0127003	0.896112	0.953712	0.0503267	0.6214	0.820221	0
YBR056W	YBR056W	-0.0703697	0.225117	0.501272	-0.0702701	0.256152	0.520697	0
YBR056W-A	YBR056W-A	-0.0961342	0.216541	0.493842	-0.111919	0.161176	0.404052	0
YBR057C	MUM2	0.0467081	0.64125	0.842565	0.0930248	0.393015	0.653037	0
YBR058C	UBP14	1.35851	5.37193e-26	5.72344e-24	1.31133	2.45325e-23	2.35752e-21	1
YBR058C-A	TSC3	-0.0584843	0.13856	0.382797	-0.093	0.031457	0.136676	0
YBR059C	AKL1	0.154557	0.0605784	0.228381	0.161245	0.0722724	0.245051	0
YBR060C	ORC2	0.264663	0.0135142	0.0815677	0.384318	0.000785687	0.00741937	0
YBR061C	TRM7	-0.0107125	0.899369	0.954486	0.0721843	0.425345	0.675591	0
YBR062C	YBR062C	-0.224789	0.00633641	0.0455287	-0.150075	0.089631	0.28359	0
YBL103C	RTG3	0.0747361	0.580448	0.805201	0.0105353	0.942387	0.97793	0
YBL102W	SFT2	-0.0131987	0.784804	0.908093	-0.0710278	0.174752	0.424411	0
YBL101C	ECM21	-0.105508	0.32453	0.606006	-0.108243	0.35359	0.618908	0
YBR063C	YBR063C	-0.0707631	0.590792	0.810357	0.00563379	0.968233	0.987298	0
YBR066C	NRG2	-1.30006	9.2842e-34	1.51673e-31	-1.65172	3.23483e-43	8.80773e-41	1
YBR067C	TIP1	-0.609018	4.88647e-09	1.45143e-07	-0.542615	1.02657e-07	2.51562e-06	1
YBR068C	BAP2	-1.38216	2.13752e-13	9.883e-12	-1.46527	4.748e-13	2.09639e-11	1
YBR070C	ALG14	0.326804	0.000284199	0.00338072	0.484547	2.75755e-07	6.19942e-06	1
YBR071W	YBR071W	0.0207599	0.777165	0.904783	0.107816	0.159426	0.40148	0
YBR072W	HSP26	-1.22869	9.93168e-25	9.54415e-23	-1.04082	2.11202e-23	2.0702e-21	1
YBL099W	ATP1	0.0382572	0.207313	0.483599	-0.0278437	0.355203	0.620624	0
YBR073W	RDH54	0.193784	0.048796	0.200125	0.29141	0.00484917	0.0340973	0
YBR074W	PFF1	0.0572334	0.506321	0.754707	0.0487637	0.592159	0.804371	0
YBR076C-A	YBR076C-A	-0.32448	0.00136612	0.0128264	-0.375259	0.000491437	0.00496605	1
YBR077C	SLM4	-0.14258	0.0905846	0.295183	-0.141662	0.110608	0.32229	0
YBR078W	ECM33	-0.0370024	0.223754	0.500179	-0.02619	0.389889	0.650002	0
YBR079C	RPG1	-0.0512204	0.297753	0.580233	-0.0513229	0.305108	0.571202	0
YBR080C	SEC18	-0.052553	0.432628	0.701383	-0.0346496	0.613249	0.816619	0
YBR081C	SPT7	-0.335803	0.00017154	0.00221826	-0.354508	0.000103349	0.00132944	1
YBR082C	UBC4	0.057296	0.0431523	0.18568	0.07501	0.00881916	0.0540563	0
YBR083W	TEC1	0.572523	1.33126e-12	5.82543e-11	0.594965	4.35831e-13	1.94183e-11	1
YBR084W	MIS1	0.159732	0.0841232	0.283686	0.155434	0.100677	0.303455	0
YBR084C-A	RPL19A	0.073443	0.0014992	0.0138895	0.0777882	0.000633345	0.00614658	1
YBR085C-A	YBR085C-A	-0.288092	1.22456e-16	7.06068e-15	-0.27243	1.75861e-15	9.79426e-14	1
YBR086C	IST2	-0.0143595	0.842863	0.934902	-0.0192462	0.796784	0.913598	0
YBR087W	RFC5	0.113603	0.201897	0.476407	0.113705	0.215293	0.474639	0
YBR088C	POL30	0.0662781	0.355403	0.636445	0.0631385	0.393518	0.653109	0
YBR089C-A	NHP6B	-0.0114379	0.702883	0.872662	-0.0194433	0.532771	0.765112	0
YBR090C	YBR090C	-0.184022	0.228047	0.505271	-0.284605	0.0769813	0.256657	0
YBR091C	TIM12	-0.266803	0.00385502	0.0309729	-0.307163	0.00149654	0.0128451	1
YBR092C	PHO3	-0.785874	6.69082e-11	2.41115e-09	-0.867504	1.68267e-12	7.1711e-11	1
YBR093C	PHO5	0.344098	0.0226187	0.11856	0.43754	0.00520055	0.0359999	0
YBR094W	PBY1	-0.191079	0.102809	0.320119	-0.0957264	0.446265	0.69279	0
YBR095C	RXT2	-0.0250032	0.775321	0.904315	-0.0371467	0.693512	0.860699	0
YBR096W	YBR096W	0.0748377	0.215987	0.492977	0.0737691	0.255808	0.520395	0
YBR097W	VPS15	-0.187938	0.202072	0.476592	-0.20984	0.18621	0.436428	0
YBR098W	MMS4	0.325144	0.0465603	0.19487	0.410835	0.0197518	0.098981	0
YBR101C	FES1	0.0749211	0.29067	0.572537	0.0599988	0.415966	0.670484	0
YBR102C	EXO84	-0.021573	0.835345	0.93089	-0.0364304	0.737657	0.884359	0
YBR103W	SIF2	0.23269	0.00183903	0.0165816	0.226672	0.00377574	0.0274146	1
YBR104W	YMC2	0.143074	0.0460855	0.193876	0.105283	0.159658	0.40148	0
YBR105C	VID24	-0.640044	1.4717e-08	4.1216e-07	-0.725418	1.07012e-09	3.36195e-08	1
YBR106W	PHO88	-0.0994431	0.000280895	0.00336354	-0.104219	0.000119423	0.00150848	1
YBR107C	IML3	0.487618	0.000591727	0.00646064	0.619614	2.59005e-05	0.000405554	1
YBR108W	AIM3	-0.21288	0.202602	0.47738	-0.114414	0.503961	0.738434	0
YBR109C	CMD1	-0.00353594	0.896932	0.954171	-0.0159321	0.562406	0.785144	0
YBR110W	ALG1	-0.00915506	0.871988	0.944556	-0.0475331	0.412191	0.668294	0
YBR111C	YSA1	0.0482769	0.277345	0.558451	0.0438922	0.334939	0.603373	0
YBR111W-A	SUS1	0.0633488	0.554014	0.789309	0.0951828	0.387246	0.64818	0
YBR112C	CYC8	-0.0333714	0.79437	0.911266	0.00684282	0.958535	0.984631	0
YBR114W	RAD16	-0.144412	0.197106	0.469852	-0.0836221	0.466139	0.711723	0
YBL095W	MRX3	-0.145849	0.061049	0.229944	-0.14792	0.104612	0.310378	0
YBL093C	ROX3	0.0176346	0.759812	0.89834	0.0237019	0.725728	0.879088	0
YBL092W	RPL32	0.0100469	0.670647	0.857512	0.0135395	0.572463	0.791883	0
YBL091C-A	SCS22	-0.0406361	0.612415	0.823453	-0.187005	0.0480374	0.184175	0
YBL091C	MAP2	-0.020142	0.689194	0.865912	0.0288084	0.625271	0.822359	0
YBR115C	LYS2	-0.0133069	0.873936	0.945451	0.000673941	0.993923	0.998335	0
YBR118W	TEF2	-0.0906146	1.55701e-17	1.01745e-15	-0.0963024	2.02451e-19	1.48091e-17	1
YBR119W	MUD1	0.0473889	0.715742	0.878652	0.0776153	0.564032	0.786212	0
YBR120C	CBP6	-0.213471	0.0423674	0.183106	-0.1831	0.0913646	0.286982	0
YBR121C	GRS1	-0.0396036	0.136018	0.378978	-0.0253458	0.351711	0.616941	0
YBR122C	MRPL36	0.161724	0.00242904	0.0212172	0.184695	0.000730996	0.00698365	1
YBR123C	TFC1	-0.0337944	0.705482	0.874005	-0.0340555	0.711522	0.87201	0
YBR125C	PTC4	-0.0445706	0.631956	0.836692	-0.0764942	0.428558	0.678343	0
YBR126C	TPS1	-0.131513	0.00524108	0.0393362	-0.11997	0.0112786	0.0648786	0
YBR126W-A	MEO1	-0.116561	0.0317022	0.149974	-0.109286	0.0513659	0.192812	0
YBR126W-B	YBR126W-B	-0.21186	0.00219449	0.0194137	-0.196013	0.00631402	0.0415928	1
YBR127C	VMA2	-0.00855096	0.751582	0.894714	0.0118006	0.664005	0.845794	0
YBR129C	OPY1	-0.181358	0.00917804	0.0606221	-0.190708	0.0105768	0.0615643	0
YBR130C	SHE3	-0.00186274	0.980302	0.993067	-0.05399	0.503347	0.738152	0
YBR131W	CCZ1	-0.047786	0.756365	0.897278	0.0201665	0.902789	0.962481	0
YBL090W	MRP21	0.0366405	0.663891	0.853549	0.0574395	0.568083	0.789389	0
YBL089W	AVT5	-0.12842	0.15281	0.40395	-0.126448	0.238701	0.502522	0
YBL088C	TEL1	-0.0534115	0.675011	0.859971	-0.0857094	0.578585	0.797201	0
YBR133C	HSL7	-0.0280139	0.772283	0.902554	0.00695607	0.9462	0.979768	0
YBR135W	CKS1	-0.116011	0.0737023	0.26194	-0.139473	0.0402557	0.164686	0
YBR137W	YBR137W	0.147273	0.00345681	0.0282863	0.183944	0.000499201	0.00502379	1
YBR138C	YBR138C	-0.0365709	0.828248	0.928693	-0.0569815	0.746411	0.888982	0
YBR139W	YBR139W	0.0218046	0.603812	0.817933	0.07375	0.0869427	0.277576	0
YBR140C	IRA1	-0.0542401	0.589576	0.809405	-0.0110318	0.91547	0.967799	0
YBR141C	BMT2	0.462387	0.00882072	0.059464	0.54866	0.00310837	0.0234132	0
YBR142W	MAK5	0.0805699	0.527319	0.77006	0.0822998	0.535491	0.768504	0
YBR143C	SUP45	-0.0079864	0.819408	0.923991	-0.0290685	0.422736	0.674151	0
YBR145W	ADH5	-0.134529	0.0650209	0.239419	-0.102258	0.175296	0.425051	0
YBR146W	MRPS9	0.14885	0.0163865	0.0931854	0.168155	0.0083369	0.0522496	0
YBR147W	RTC2	0.0184535	0.83554	0.93089	0.0697898	0.446405	0.69279	0
YBR149W	ARA1	0.13355	0.000183903	0.00235944	0.120103	0.000819885	0.00769781	1
YBR150C	TBS1	0.138078	0.248576	0.528764	0.186705	0.131374	0.3585	0
YBR151W	APD1	-0.0248048	0.570306	0.798037	-0.0185965	0.68175	0.854541	0
YBR153W	RIB7	0.0536685	0.523623	0.767587	0.0480517	0.582999	0.800094	0
YBR154C	RPB5	0.0851866	0.0587237	0.22401	0.093257	0.0457985	0.178567	0
YBR155W	CNS1	-0.184767	0.0698637	0.253256	-0.172805	0.104028	0.31019	0
YBR156C	SLI15	-0.0923416	0.531526	0.77277	-0.0188994	0.902293	0.962381	0
YBR157C	ICS2	0.112508	0.419228	0.68974	0.179441	0.217689	0.478428	0
YBR158W	AMN1	0.22483	0.000591885	0.00646064	0.233721	0.000474714	0.00485715	1
YBR159W	IFA38	-0.258566	1.88695e-09	5.81631e-08	-0.284543	1.23987e-10	4.27929e-09	1
YBR160W	CDC28	-0.151241	0.0102984	0.0661503	-0.149788	0.0131891	0.0723849	0
YBR161W	CSH1	0.173079	0.00805865	0.0550843	0.194299	0.00364728	0.0267195	0
YBR162C	TOS1	0.0666852	0.00909436	0.0604769	0.0547801	0.0319051	0.138011	0
YBR162W-A	YSY6	-0.0564956	0.242708	0.521717	-0.0759901	0.124537	0.347386	0
YBR163W	EXO5	-0.039077	0.700163	0.871554	-0.101728	0.334009	0.602356	0
YBR164C	ARL1	-0.0324076	0.530096	0.771607	-0.0586977	0.272365	0.541966	0
YBR165W	UBS1	0.174796	0.032098	0.151174	0.168618	0.0453819	0.177708	0
YBR166C	TYR1	-0.247801	0.00279152	0.0238765	-0.282998	0.000948055	0.00871748	1
YBR167C	POP7	-0.16191	0.130279	0.371664	-0.236719	0.0327214	0.14055	0
YBR168W	PEX32	-0.153475	0.116453	0.346606	-0.128927	0.201222	0.457416	0
YBR169C	SSE2	-0.18952	0.00902603	0.0602485	-0.248259	0.000885205	0.00817022	0
YBR170C	NPL4	0.161724	0.0321277	0.151174	0.155583	0.0458488	0.178621	0
YBR171W	SEC66	0.013839	0.724754	0.882349	0.00391051	0.922754	0.969227	0
YBR172C	SMY2	-0.0918144	0.171968	0.432728	-0.110671	0.108664	0.317569	0
YBR173C	UMP1	0.292794	4.46124e-13	2.00592e-11	0.296417	1.16757e-12	5.01952e-11	1
YBR175W	SWD3	-0.0129527	0.887477	0.951653	-0.0423191	0.653395	0.838516	0
YBR176W	ECM31	0.104366	0.260182	0.540548	0.142235	0.135649	0.363835	0
YBR177C	EHT1	-0.154089	0.00119283	0.0115993	-0.12878	0.00728657	0.0469888	1
YBR179C	FZO1	0.0615249	0.615204	0.825607	0.113672	0.3707	0.634807	0
YBR181C	RPS6B	0.0962638	0.00021382	0.00268013	0.0805456	0.000911479	0.00839691	1
YBR182C	SMP1	-0.370517	0.000400432	0.00463952	-0.337936	0.00178255	0.0148324	1
YBR183W	YPC1	-0.334249	0.000567676	0.00623807	-0.318258	0.00139797	0.0122347	1
YBR185C	MBA1	-0.141479	0.114354	0.341945	-0.0950543	0.300773	0.567393	0
YBR187W	GDT1	-0.124593	0.0161692	0.0921454	-0.127121	0.0159843	0.0840237	0
YBR188C	NTC20	-0.00808373	0.935042	0.971516	0.0618825	0.539146	0.77059	0
YBR189W	RPS9B	0.0077121	0.731366	0.88531	0.0271201	0.222178	0.483523	0
YBR191W	RPL21A	0.0361659	0.110899	0.335165	0.0312396	0.158049	0.399895	0
YBR192W	RIM2	0.0101957	0.911572	0.961398	-0.000861388	0.992618	0.998335	0
YBR193C	MED8	-0.209791	0.0643898	0.237841	-0.193046	0.0931768	0.290311	0
YBR194W	AIM4	-0.0867285	0.436608	0.703021	-0.121448	0.282667	0.550179	0
YBR195C	MSI1	-0.109317	0.232302	0.509174	-0.0963609	0.298493	0.565253	0
YBR196C	PGI1	-0.133067	1.43223e-07	3.37469e-06	-0.118823	1.95245e-06	3.70889e-05	1
YBR197C	YBR197C	-2.19026	5.05262e-25	5.05365e-23	-2.03815	6.92074e-24	7.06637e-22	1
YBR198C	TAF5	0.237752	0.00633864	0.0455287	0.252918	0.00430677	0.0308589	1
YBR199W	KTR4	0.205631	5.99306e-08	1.52979e-06	0.213214	4.44177e-08	1.13974e-06	1
YBR200W	BEM1	-0.123411	0.170547	0.430629	-0.132154	0.152456	0.389972	0
YBR201W	DER1	-0.110761	0.0516272	0.206173	-0.13297	0.0212918	0.10402	0
YBR201C-A	YBR201C-A	0.191298	0.156716	0.410617	0.178876	0.198573	0.453361	0
YBR202W	MCM7	0.214832	0.0182952	0.101316	0.246856	0.00900041	0.0546358	0
YBR203W	COS111	0.198415	0.152009	0.403574	0.167055	0.245809	0.510633	0
YBR204C	LDH1	-0.13724	0.0915558	0.296769	-0.15444	0.0698426	0.240378	0
YBR205W	KTR3	-0.190679	0.0011219	0.0110189	-0.172282	0.0049853	0.0348142	1
YBR206W	YBR206W	-0.344672	9.40717e-05	0.00133636	-0.342461	0.000205405	0.0024026	1
YBR207W	FTH1	-0.131361	0.0110923	0.0699658	-0.142635	0.00811078	0.0511595	0
YBR208C	DUR1,2	-0.0506225	0.680625	0.861485	0.0200128	0.87742	0.949196	0
YBL087C	RPL23A	0.0113895	0.678213	0.860496	0.0294528	0.328302	0.596813	0
YBL085W	BOI1	0.0820142	0.438906	0.704025	0.067163	0.602634	0.808674	0
YBR210W	ERV15	0.16809	0.0135051	0.0815677	0.252749	0.000558762	0.00555475	0
YBR211C	AME1	0.97496	7.2182e-10	2.3274e-08	1.18365	8.87561e-12	3.50801e-10	1
YBR212W	NGR1	-0.140994	0.107071	0.328383	-0.172225	0.0669489	0.234369	0
YBR213W	MET8	-0.0116875	0.91994	0.965238	0.00403625	0.974131	0.989644	0
YBR214W	SDS24	-0.0340226	0.630977	0.836468	-0.0119185	0.875364	0.948311	0
YBR215W	HPC2	0.00163329	0.98876	0.996679	-0.0724475	0.564634	0.786603	0
YBR216C	YBP1	-0.105678	0.31443	0.597034	-0.130476	0.251741	0.516982	0
YBR217W	ATG12	0.0159396	0.875562	0.945808	-0.0313484	0.7767	0.905747	0
YBR218C	PYC2	0.449732	0.00129806	0.0124088	0.413333	0.00492696	0.0345451	1
YBR220C	YBR220C	-0.112939	0.199789	0.473714	-0.104827	0.258633	0.523786	0
YBR221C	PDB1	0.00896732	0.736343	0.887083	0.0143464	0.603151	0.808766	0
YBR222C	PCS60	0.0467845	0.406101	0.677985	0.0635782	0.279093	0.548108	0
YBR223C	TDP1	-0.0289603	0.846077	0.934902	-0.0191883	0.902227	0.962381	0
YBR227C	MCX1	0.0434779	0.662274	0.851874	0.0735793	0.482485	0.723417	0
YBR228W	SLX1	-0.150296	0.0894761	0.29313	-0.121552	0.193118	0.447081	0
YBR229C	ROT2	-0.033967	0.652928	0.846732	-0.00421472	0.958051	0.984631	0
YBR230C	OM14	-0.0281198	0.559948	0.792693	-0.0462251	0.334326	0.602624	0
YBR230W-A	YBR230W-A	0.0752673	0.171596	0.432382	0.0707119	0.219654	0.481024	0
YBR231C	SWC5	-0.155957	0.12189	0.357108	-0.279004	0.0101221	0.0595002	0
YBR233W	PBP2	-0.496736	2.7283e-08	7.34693e-07	-0.487021	2.39367e-07	5.45646e-06	1
YBR233W-A	DAD3	0.119491	0.213889	0.490762	0.152369	0.133701	0.362088	0
YBR234C	ARC40	-0.0233883	0.52965	0.77141	-0.0417231	0.28702	0.554687	0
YBR235W	VHC1	-0.274588	0.0076858	0.0532788	-0.330283	0.00246828	0.0194392	0
YBR236C	ABD1	-0.188959	0.00964375	0.0629348	-0.206139	0.00751713	0.0481588	0
YBR237W	PRP5	0.0465932	0.661279	0.851532	0.0656439	0.559695	0.782614	0
YBR239C	ERT1	0.148515	0.338775	0.619457	0.272443	0.105524	0.311739	0
YBR240C	THI2	-1.62564	8.00264e-14	3.80786e-12	-1.80556	1.30698e-14	6.81438e-13	1
YBR241C	YBR241C	-0.0852796	0.293848	0.574909	-0.0838291	0.358385	0.623515	0
YBR242W	YBR242W	-0.109264	0.164277	0.42175	-0.126439	0.15009	0.386339	0
YBR243C	ALG7	-0.0384545	0.615888	0.825699	-0.0410419	0.628599	0.82406	0
YBR244W	GPX2	-0.0229378	0.836327	0.93089	0.00401289	0.973981	0.989644	0
YBR245C	ISW1	0.0785382	0.314656	0.597034	0.0884634	0.304085	0.570785	0
YBR246W	RRT2	-0.0156771	0.849064	0.935618	-0.0764804	0.40526	0.663609	0
YBR247C	ENP1	0.0405377	0.605471	0.819685	0.0141188	0.871287	0.946572	0
YBL082C	ALG3	0.0681189	0.464944	0.725929	0.155748	0.167779	0.414529	0
YBR248C	HIS7	0.0360117	0.457048	0.718868	-0.0092168	0.863692	0.944751	0
YBR249C	ARO4	-0.128954	0.00142632	0.0133405	-0.168341	0.000133126	0.00166311	1
YBR251W	MRPS5	-0.0170783	0.870962	0.944556	0.0525508	0.656904	0.841256	0
YBR252W	DUT1	-0.0105426	0.85715	0.938532	-0.0835067	0.20583	0.464231	0
YBR253W	SRB6	0.163132	0.117038	0.347849	0.176004	0.139208	0.368391	0
YBR254C	TRS20	0.0519848	0.544502	0.780979	0.0812993	0.40705	0.664541	0
YBR255W	MTC4	-0.0432253	0.681404	0.861485	-0.292363	0.017632	0.0907715	0
YBR255C-A	RCF3	0.0367708	0.579164	0.804036	-0.0249744	0.743216	0.887163	0
YBR256C	RIB5	0.0359919	0.431214	0.700491	-0.0219957	0.670717	0.849621	0
YBR257W	POP4	0.166018	0.168409	0.426991	0.22602	0.1003	0.302876	0
YBL081W	YBL081W	-0.157478	0.172847	0.433767	-0.157829	0.259552	0.525106	0
YBL080C	PET112	0.0967902	0.538422	0.777165	0.117002	0.537087	0.769893	0
YBL079W	NUP170	0.0655915	0.510772	0.75778	0.0225716	0.852358	0.941644	0
YBR259W	YBR259W	0.0978752	0.479004	0.735924	0.139335	0.387132	0.64818	0
YBR260C	RGD1	-0.121911	0.157685	0.412098	0.0222145	0.823739	0.927013	0
YBR261C	TAE1	-0.0533926	0.525562	0.768681	-0.0393701	0.684299	0.855767	0
YBR262C	MIC12	0.0561171	0.399886	0.673023	0.104851	0.173702	0.42302	0
YBR263W	SHM1	0.109747	0.0551965	0.215209	0.238429	0.000334446	0.00362637	0
YBR264C	YPT10	-0.00550039	0.949568	0.980165	-0.020745	0.838343	0.935288	0
YBR265W	TSC10	0.0939221	0.205468	0.481526	0.0691275	0.423406	0.674151	0
YBR267W	REI1	0.0984339	0.273598	0.554779	0.198392	0.0549305	0.202213	0
YBR268W	MRPL37	0.0753914	0.188657	0.458373	0.121807	0.0676772	0.235405	0
YBR269C	SDH8	6.48087e-05	0.999104	0.999124	-0.0785932	0.244914	0.509908	0
YBR270C	BIT2	-0.0212675	0.874145	0.945451	-0.12831	0.417521	0.670908	0
YBR271W	EFM2	-0.15789	0.17025	0.430102	-0.181763	0.176039	0.425637	0
YBR272C	HSM3	0.172057	0.0329625	0.154297	0.264616	0.00465886	0.0331395	0
YBR273C	UBX7	0.00711925	0.935368	0.971649	-0.0128163	0.900447	0.96109	0
YBR274W	CHK1	-0.24035	0.0283931	0.138643	-0.281483	0.0273582	0.124043	0
YBR276C	PPS1	0.101839	0.239382	0.516598	0.123813	0.218303	0.479133	0
YBR278W	DPB3	0.0349589	0.749217	0.894714	0.0129216	0.919406	0.968483	0
YBR279W	PAF1	0.0858614	0.267751	0.54837	0.0707466	0.423285	0.674151	0
YBR280C	SAF1	0.0502793	0.685916	0.864628	0.00841309	0.952984	0.983072	0
YBR281C	DUG2	-0.247265	0.0450124	0.190836	-0.154195	0.268727	0.536813	0
YBR282W	MRPL27	0.116196	0.131088	0.372874	0.240669	0.00530251	0.0365508	0
YBR283C	SSH1	0.0371468	0.287384	0.569309	0.0854005	0.0274902	0.124404	0
YBR286W	APE3	-0.0494779	0.398685	0.672765	-0.0388697	0.567062	0.788418	0
YBR287W	YBR287W	0.0398785	0.289962	0.571991	-0.0115247	0.787534	0.909246	0
YBR288C	APM3	-0.022149	0.747627	0.89429	0.0216068	0.783381	0.907505	0
YBR289W	SNF5	-0.252583	0.0785506	0.271993	-0.28069	0.0929406	0.290129	0
YBR290W	BSD2	0.0733059	0.356152	0.636445	0.0945871	0.298356	0.565253	0
YBR291C	CTP1	-0.184299	0.00577408	0.0423635	-0.19893	0.0137016	0.074613	0
YBR293W	VBA2	0.0294543	0.798342	0.912417	0.156108	0.260229	0.526149	0
YBR294W	SUL1	0.025219	0.849128	0.935618	0.0631653	0.668731	0.848577	0
YBR295W	PCA1	-0.056062	0.704147	0.873011	-0.184667	0.310857	0.578182	0
YBL078C	ATG8	0.00949579	0.85123	0.936252	0.0286974	0.62442	0.822347	0
YBL076C	ILS1	-0.00314422	0.940608	0.974905	0.00641475	0.897731	0.960232	0
YBL075C	SSA3	-0.283212	0.0158721	0.0910882	-0.219072	0.114224	0.329883	0
YBL072C	RPS8A	-0.0346193	0.121528	0.356779	-0.0507516	0.0365957	0.152254	0
YBL071W-A	KTI11	0.0212712	0.754377	0.896509	-0.00499195	0.949923	0.98136	0
YBL069W	AST1	0.0819824	0.534494	0.774787	0.157235	0.310454	0.577653	0
YBL068W	PRS4	0.0977025	0.15258	0.403862	0.0696378	0.386594	0.647799	0
YBL067C	UBP13	-0.0793667	0.437138	0.703021	-0.024403	0.839449	0.935669	0
YCL014W	BUD3	0.0755729	0.564805	0.794848	0.147565	0.300128	0.566832	0
YCL012C	YCL012C	0.101629	0.122514	0.357831	0.171441	0.0151013	0.0805349	0
YCL011C	GBP2	0.00885317	0.871524	0.944556	0.0326276	0.587296	0.802884	0
YCL009C	ILV6	0.118608	4.95299e-05	0.000746911	0.138756	8.17603e-06	0.000141593	1
YCL008C	STP22	0.13433	0.18053	0.444858	0.0676717	0.540386	0.771688	0
YCL005W-A	VMA9	0.125406	0.386654	0.661429	-0.0282113	0.863442	0.944751	0
YCL005W	LDB16	-0.0500355	0.611421	0.822783	-0.1355	0.218037	0.478764	0
YCL002C	YCL002C	0.0586383	0.518888	0.764603	0.0726872	0.452459	0.697767	0
YCR002C	CDC10	-0.00671486	0.913378	0.962474	-0.00248869	0.969607	0.987298	0
YCR004C	YCP4	-0.0291137	0.586044	0.809298	-0.0875556	0.118685	0.337166	0
YCR005C	CIT2	-0.0963801	0.0356501	0.16238	-0.0802758	0.0893616	0.283153	0
YCR007C	YCR007C	-0.142175	0.477221	0.734555	-0.158639	0.461458	0.70808	0
YCR008W	SAT4	-0.161446	0.172952	0.433767	-0.14583	0.244254	0.50875	0
YCR009C	RVS161	0.0339096	0.488294	0.742162	0.0240639	0.640038	0.829672	0
YCR011C	ADP1	-0.0366181	0.69384	0.869155	-0.101628	0.331835	0.599753	0
YCR013C	YCR013C	0.0133738	0.945028	0.977952	0.093168	0.662604	0.845023	0
YCR014C	POL4	0.163337	0.325147	0.606372	0.181433	0.327984	0.596729	0
YCR015C	CTO1	-0.102995	0.617882	0.826862	0.0110341	0.959666	0.985196	0
YCR017C	CWH43	-0.00745109	0.921307	0.965959	-0.0586023	0.488241	0.728202	0
YCR018C	SRD1	-2.27745	2.47374e-14	1.22463e-12	-1.74997	1.27617e-13	5.90049e-12	1
YCR019W	MAK32	0.101975	0.430029	0.699726	0.133085	0.354959	0.620434	0
YCR020C	PET18	-0.0910421	0.461793	0.723082	-0.0656403	0.635944	0.827648	0
YCR020C-A	MAK31	0.232615	0.0270402	0.13366	0.262946	0.028972	0.129155	0
YCR021C	HSP30	-0.0810994	0.674318	0.859971	0.0780895	0.717912	0.874652	0
YCR023C	YCR023C	0.114861	0.277123	0.558391	0.0950414	0.407013	0.664541	0
YCR024C	SLM5	-0.155947	0.32815	0.608039	-0.228222	0.194492	0.449201	0
YCR024C-B	YCR024C-B	0.0918545	0.0235624	0.12233	-0.0685173	0.0818247	0.266724	0
YCR024C-A	PMP1	-0.00291048	0.970288	0.987619	-0.0925062	0.220579	0.481429	0
YCR026C	NPP1	-0.12035	0.399787	0.673023	-0.164952	0.245812	0.510633	0
YCR027C	RHB1	0.0249923	0.871798	0.944556	-0.054775	0.725325	0.878818	0
YCR028C	FEN2	0.0631725	0.727802	0.884692	0.105943	0.478123	0.720301	0
YCR028C-A	RIM1	-0.0135359	0.831169	0.930036	0.0540431	0.293688	0.5605	0
YCR030C	SYP1	0.0222035	0.888092	0.951999	-0.0260993	0.844394	0.938194	0
YCR031C	RPS14A	-0.103469	0.0371816	0.166114	-0.0638723	0.103174	0.308514	0
YCR032W	BPH1	-0.0723656	0.784043	0.907771	-0.168334	0.451114	0.696789	0
YCR033W	SNT1	0.0268801	0.863936	0.940923	0.0358531	0.782442	0.907505	0
YCR035C	RRP43	-0.0855458	0.555026	0.790291	0.0582281	0.60753	0.813321	0
YCR037C	PHO87	-0.0307767	0.90644	0.958327	0.0222844	0.894129	0.95847	0
YCR042C	TAF2	-1.03151	0.0422754	0.18287	-0.5324	0.0185566	0.0942443	0
YCR043C	YCR043C	-0.0830471	0.540257	0.777621	0.066572	0.428161	0.678002	0
YCR044C	PER1	0.258816	0.164124	0.42158	-0.00538735	0.968515	0.987298	0
YCR046C	IMG1	0.193339	0.245235	0.52494	0.00453947	0.969048	0.987298	0
YCR047C	BUD23	-0.0459283	0.807515	0.917136	0.095335	0.566901	0.788418	0
YCR048W	ARE1	-0.0156041	0.933907	0.970856	-0.119236	0.652585	0.837898	0
YCR054C	CTR86	-0.449653	0.0446074	0.18994	-0.305034	0.230149	0.492109	0
YCR057C	PWP2	0.223722	0.0311137	0.148335	0.280676	0.0339626	0.144238	0
YCR059C	YIH1	-0.0508783	0.666007	0.855029	0.118066	0.40674	0.664477	0
YCR060W	TAH1	0.13479	0.133343	0.375848	0.0547031	0.639035	0.828767	0
YCR065W	HCM1	-0.213263	0.0963448	0.306433	-0.261301	0.0954337	0.294109	0
YCR067C	SED4	-0.134178	0.25104	0.531238	-0.151857	0.294001	0.56088	0
YCR071C	IMG2	-0.0781033	0.469987	0.730313	-0.0773605	0.541367	0.771997	0
YCR072C	RSA4	0.288174	0.0114052	0.0716625	0.440095	0.000749135	0.00710157	0
YCR075C	ERS1	0.0993239	0.379853	0.655744	0.144964	0.276382	0.546135	0
YCR076C	FUB1	0.107714	0.277202	0.558391	0.115437	0.314666	0.583175	0
YCR077C	PAT1	-0.012639	0.875859	0.94592	-0.0544279	0.568518	0.789769	0
YCR083W	TRX3	0.0724833	0.400855	0.673497	0.0266108	0.795995	0.913598	0
YCR084C	TUP1	0.734937	2.29678e-23	2.04664e-21	0.814956	3.59124e-21	3.20012e-19	1
YCR087W	YCR087W	0.0176853	0.916195	0.96407	0.0554217	0.778707	0.906972	0
YCR087C-A	YCR087C-A	0.168127	0.119302	0.352654	0.231103	0.0653943	0.230411	0
YCR090C	YCR090C	0.0902261	0.19384	0.466148	-0.00363593	0.964796	0.986474	0
YCR092C	MSH3	-0.168924	0.237271	0.513407	-0.401167	0.0357631	0.14968	0
YCR093W	CDC39	0.104551	0.26462	0.544688	0.279218	0.0190144	0.0963696	0
YCR095C	OCA4	-0.0587365	0.563606	0.794214	-0.10942	0.412011	0.668294	0
YCR097W	HMRA1	-0.110712	0.135436	0.378085	-0.0815786	0.399767	0.659017	0
YCR098C	GIT1	1.08246	2.55962e-19	1.87234e-17	0.74456	2.99954e-07	6.68215e-06	1
YCL059C	KRR1	-0.0128317	0.854814	0.937655	0.00128333	0.986945	0.996091	0
YCL057C-A	MIC10	0.0242711	0.570097	0.798037	-0.0249558	0.595929	0.806123	0
YCL056C	PEX34	0.344013	0.00011344	0.00156171	0.27444	0.00480231	0.0338163	1
YCL054W-A	RDT1	0.405139	1.14571e-09	3.59943e-08	0.567803	6.00601e-15	3.23467e-13	1
YCL052C	PBN1	-0.014584	0.827411	0.928399	0.0138953	0.852494	0.941644	0
YCL051W	LRE1	-0.03397	0.736491	0.887083	0.000872693	0.993835	0.998335	0
YCL050C	APA1	-0.00959451	0.822242	0.925444	-0.02036	0.666139	0.846678	0
YCL049C	YCL049C	-0.06087	0.566705	0.79605	-0.190818	0.107867	0.315897	0
YCL048W-A	YCL048W-A	0.226957	0.290601	0.572537	0.294458	0.19195	0.445219	0
YCL047C	POF1	-0.128814	0.111434	0.336073	-0.195897	0.0263049	0.120486	0
YCL045C	EMC1	-0.00673545	0.909574	0.960142	0.0335266	0.600283	0.807553	0
YCL044C	MGR1	0.0280502	0.789898	0.909532	0.0433567	0.691003	0.860699	0
YCL043C	PDI1	0.0366174	0.279265	0.559559	0.058016	0.0709056	0.243013	0
YCL039W	GID7	0.168096	0.268916	0.549606	0.363139	0.0354394	0.149089	0
YCL038C	ATG22	0.209372	0.0130668	0.0801509	0.144258	0.136969	0.36599	0
YCL037C	SRO9	0.33747	0.000631381	0.0068309	0.312455	0.00593326	0.039568	1
YCL036W	GFD2	-0.25071	0.135612	0.378085	-0.101042	0.59894	0.807218	0
YCL035C	GRX1	0.129797	0.000115855	0.00158163	0.159085	1.79538e-05	0.000287554	1
YCL034W	LSB5	-0.0452039	0.528431	0.770557	-0.082883	0.310354	0.577653	0
YCL033C	MXR2	0.11344	0.111068	0.335394	0.126388	0.133601	0.362088	0
YCL032W	STE50	0.032656	0.736805	0.887244	0.056529	0.621163	0.820129	0
YCL031C	RRP7	0.0768009	0.153068	0.404108	0.0686603	0.279681	0.548506	0
YCL030C	HIS4	-0.0261292	0.499163	0.749464	-0.0274314	0.535808	0.768734	0
YCL029C	BIK1	-0.0383671	0.79824	0.912417	0.0420759	0.811145	0.920876	0
YCL027W	FUS1	0.353403	0.0202671	0.109393	0.325025	0.0455393	0.177943	0
YCL026C-B	HBN1	0.954326	1.9117e-88	1.17115e-85	1.06367	3.85116e-107	4.71864e-104	1
YCL025C	AGP1	0.131492	0.407077	0.678832	0.218831	0.212908	0.471728	0
YCL024W	KCC4	0.117267	0.431208	0.700491	0.235032	0.149939	0.386339	0
YCL021W-A	YCL021W-A	-0.237684	0.217752	0.495501	-0.307045	0.150031	0.386339	0
YCL018W	LEU2	-0.201064	1.04792e-06	2.13995e-05	-0.218052	1.88394e-07	4.46047e-06	1
YCL017C	NFS1	0.0742187	0.20561	0.481526	0.0834169	0.178666	0.428607	0
YCL016C	DCC1	0.0429406	0.762783	0.899507	0.0125435	0.935108	0.974635	0
YDR266C	HEL2	-0.019875	0.798185	0.912417	-0.026476	0.768301	0.899963	0
YDR267C	CIA1	0.0478004	0.589814	0.809405	0.0618134	0.547079	0.77582	0
YDR268W	MSW1	-0.291396	0.00925174	0.0607814	-0.240727	0.0611203	0.21881	0
YDR270W	CCC2	-0.207487	0.00220289	0.0194529	-0.277215	0.000369906	0.0039497	1
YDR272W	GLO2	-0.0464226	0.366323	0.645576	-0.0385929	0.505179	0.739069	0
YDR275W	BSC2	0.0311331	0.679069	0.861031	0.077927	0.364296	0.629636	0
YDR276C	PMP3	0.0324657	0.144913	0.392628	0.0307394	0.18886	0.441394	0
YDR279W	RNH202	-0.113362	0.239429	0.516598	-0.0933487	0.404418	0.662451	0
YDR280W	RRP45	-0.0328958	0.596919	0.813769	-0.0234607	0.745942	0.888901	0
YDR281C	PHM6	0.0602648	0.711668	0.876281	0.0147374	0.937678	0.975633	0
YDR282C	MRX10	0.0386104	0.767909	0.900892	0.0498836	0.743037	0.887163	0
YDR283C	GCN2	0.088719	0.259213	0.539464	0.0992943	0.280166	0.548756	0
YDR284C	DPP1	0.0322632	0.582894	0.807312	0.0565386	0.398667	0.65809	0
YDR286C	YDR286C	0.0599895	0.559788	0.792693	0.0868451	0.466284	0.711723	0
YDR287W	INM2	-0.0500882	0.565863	0.795552	-0.0719782	0.475684	0.718881	0
YDR288W	NSE3	0.0314226	0.696882	0.870301	-0.0473614	0.611243	0.815156	0
YDL199C	YDL199C	-0.0334943	0.815732	0.922576	0.00803424	0.957651	0.984631	0
YDL198C	GGC1	-0.0527871	0.253719	0.534635	-0.0526444	0.268968	0.53695	0
YDR289C	RTT103	-0.0763179	0.436788	0.703021	-0.0909628	0.417224	0.670651	0
YDR291W	HRQ1	-0.119233	0.387614	0.661516	-0.346144	0.0295401	0.130643	0
YDR292C	SRP101	0.00126628	0.988107	0.996443	0.0677535	0.486026	0.726557	0
YDR293C	SSD1	-0.106885	0.121097	0.356241	-0.0915987	0.235838	0.498639	0
YDL197C	ASF2	-0.270696	0.0183989	0.101546	-0.240648	0.0454538	0.177788	0
YDR294C	DPL1	-0.0943652	0.091404	0.29667	-0.125919	0.0390486	0.160282	0
YDR295C	HDA2	0.446059	9.25648e-06	0.000161445	0.568419	2.14233e-07	4.9761e-06	1
YDR296W	MHR1	0.0649819	0.393556	0.668518	0.155775	0.0601635	0.21681	0
YDR297W	SUR2	-0.340365	9.19036e-08	2.29806e-06	-0.407408	7.45629e-10	2.37294e-08	1
YDR298C	ATP5	0.0029225	0.926301	0.968181	-0.0137328	0.671971	0.850294	0
YDR299W	BFR2	-0.121916	0.19102	0.461152	-0.083179	0.41338	0.668859	0
YDR300C	PRO1	-0.00267399	0.971652	0.988112	-0.0204814	0.802651	0.916885	0
YDR301W	CFT1	-0.0174369	0.866935	0.942722	-0.0617761	0.589396	0.8034	0
YDR302W	GPI11	0.055948	0.379378	0.655702	0.0645932	0.350093	0.615741	0
YDR303C	RSC3	0.0412628	0.637504	0.839669	0.0285813	0.76417	0.897483	0
YDL195W	SEC31	-0.0820281	0.199232	0.473308	-0.117419	0.080228	0.263364	0
YDR304C	CPR5	0.0189097	0.563615	0.794214	0.0235413	0.502131	0.737251	0
YDR305C	HNT2	0.115833	0.29095	0.572562	0.0926689	0.436618	0.685196	0
YDR306C	YDR306C	-0.040422	0.713465	0.877848	-0.0236328	0.843943	0.938194	0
YDR307W	PMT7	0.165108	0.050673	0.204234	0.194383	0.0359735	0.150432	0
YDR308C	SRB7	-0.149095	0.133361	0.375848	-0.0737351	0.498954	0.734259	0
YDR309C	GIC2	-0.0224946	0.710033	0.875881	-0.0371774	0.569259	0.789835	0
YDR310C	SUM1	0.021204	0.782151	0.907132	0.0239834	0.775714	0.905747	0
YDR311W	TFB1	-0.0325055	0.800647	0.91353	0.000167576	0.999055	0.999326	0
YDR312W	SSF2	-0.0360746	0.719747	0.88011	-0.00976996	0.929078	0.972549	0
YDR313C	PIB1	-0.0192041	0.829336	0.929471	-0.0830233	0.396785	0.655983	0
YDR315C	IPK1	0.0255298	0.785835	0.908129	-0.0160276	0.878995	0.949935	0
YDR316W	OMS1	0.13664	0.106703	0.327869	0.111192	0.238944	0.502603	0
YDR318W	MCM21	-0.101311	0.357093	0.636445	-0.0980695	0.423145	0.674151	0
YDR319C	YFT2	-0.0226791	0.752716	0.89562	-0.0801408	0.31801	0.585488	0
YDR320C	SWA2	0.0964658	0.255106	0.536599	0.0718848	0.443514	0.691368	0
YDR320C-A	DAD4	-0.153154	0.0612269	0.23011	-0.136634	0.139877	0.369562	0
YDR321W	ASP1	-0.0220345	0.681087	0.861485	0.00101249	0.98644	0.996091	0
YDR322W	MRPL35	0.0974589	0.172332	0.433349	0.0985621	0.215234	0.474639	0
YDR322C-A	TIM11	0.0125332	0.707821	0.875123	0.00141182	0.969039	0.987298	0
YDR323C	PEP7	0.148989	0.270989	0.552175	0.174358	0.248815	0.513665	0
YDR324C	UTP4	0.111016	0.26631	0.546664	0.10413	0.34758	0.614635	0
YDR325W	YCG1	0.183083	0.099403	0.314103	0.354394	0.00544374	0.036983	0
YDR326C	YSP2	-0.103095	0.373784	0.652159	-0.234664	0.0843433	0.271952	0
YDR328C	SKP1	0.0282425	0.558234	0.792119	0.0429925	0.438902	0.687388	0
YDR329C	PEX3	-0.125069	0.122143	0.357175	-0.125578	0.181861	0.431728	0
YDR330W	UBX5	-0.0588964	0.509957	0.757364	0.0835182	0.421462	0.674151	0
YDR331W	GPI8	-0.0034732	0.960788	0.983881	0.0171209	0.835535	0.933004	0
YDR332W	IRC3	0.0541655	0.753362	0.895997	0.109137	0.589803	0.8034	0
YDR333C	RQC1	0.0697094	0.42632	0.696929	0.0204766	0.841482	0.937084	0
YDR334W	SWR1	-0.0569453	0.590962	0.810357	-0.0188265	0.880944	0.950993	0
YDR335W	MSN5	0.0477464	0.546881	0.782848	0.0719938	0.443828	0.691603	0
YDR336W	MRX8	-0.0477978	0.68295	0.862568	-0.0694019	0.616111	0.817188	0
YDR337W	MRPS28	-0.0220173	0.789049	0.909532	0.0696751	0.469377	0.713087	0
YDR338C	YDR338C	-0.148604	0.214378	0.491426	-0.122708	0.383465	0.645871	0
YDR339C	FCF1	0.046877	0.430539	0.699858	0.0422734	0.546197	0.775428	0
YDR341C	YDR341C	0.0934494	0.0372501	0.166269	0.168522	0.00141427	0.0122678	0
YDL193W	NUS1	-0.104381	0.0929426	0.298983	-0.0963056	0.127385	0.351726	0
YDR342C	HXT7	0.331287	0.0123005	0.0764066	0.27839	0.0246837	0.114995	0
YDR343C	HXT6	0.00945892	0.947511	0.979075	-0.0773852	0.600289	0.807553	0
YDR345C	HXT3	0.0286207	0.41606	0.68649	0.00874482	0.828504	0.929388	0
YDR346C	SVF1	0.0332232	0.50154	0.751236	0.0523792	0.358317	0.623515	0
YDR347W	MRP1	-0.000477537	0.994622	0.997646	-0.0447463	0.590396	0.8034	0
YDR348C	PAL1	-0.00957622	0.928695	0.969066	-0.0300055	0.809078	0.920235	0
YDL192W	ARF1	0.0651083	0.00473198	0.0364645	0.0865998	0.000155637	0.00188806	1
YDL191W	RPL35A	0.0637493	0.017194	0.0964164	0.0568614	0.0301709	0.132261	0
YDR349C	YPS7	0.108713	0.0725625	0.259933	0.153354	0.0252648	0.117035	0
YDR350C	ATP22	0.0249618	0.784923	0.908093	0.00979527	0.925271	0.970529	0
YDR351W	SBE2	-0.135363	0.132004	0.373961	-0.0860635	0.399584	0.658994	0
YDR352W	YPQ2	-0.0443885	0.669549	0.857156	-0.148494	0.212344	0.47133	0
YDR353W	TRR1	0.0276445	0.400968	0.673497	0.0366749	0.317174	0.584827	0
YDR354W	TRP4	-0.112669	0.136938	0.380244	-0.173655	0.039187	0.160582	0
YDR356W	SPC110	0.138213	0.196022	0.468624	0.183751	0.121362	0.342623	0
YDR357C	CNL1	-0.548197	3.93429e-12	1.64803e-10	-0.738854	1.55848e-16	9.66848e-15	1
YDR358W	GGA1	0.0320808	0.76271	0.899507	0.0250912	0.831248	0.930174	0
YDR359C	EAF1	-0.043051	0.630027	0.835433	-0.0260153	0.794712	0.912792	0
YDL190C	UFD2	-0.138032	0.148246	0.398932	-0.152526	0.125956	0.349354	0
YDL189W	RBS1	-0.154871	0.0723252	0.259492	-0.190857	0.0339386	0.144238	0
YDR361C	BCP1	0.0972919	0.274572	0.556066	0.082037	0.403029	0.662364	0
YDR362C	TFC6	0.063723	0.523165	0.767214	0.077319	0.484792	0.725929	0
YDR363W	ESC2	0.0624362	0.632919	0.837209	0.0671861	0.645531	0.832543	0
YDR363W-A	SEM1	0.0336956	0.680696	0.861485	0.0134601	0.882458	0.951998	0
YDR364C	CDC40	-0.0808125	0.434507	0.702349	-0.00990655	0.931129	0.973435	0
YDR365C	ESF1	-0.445895	1.43094e-07	3.37469e-06	-0.479682	2.26133e-07	5.17887e-06	1
YDR366C	YDR366C	-0.55304	9.46499e-08	2.35472e-06	-0.517489	4.34151e-06	7.73737e-05	1
YDR367W	KEI1	0.165374	0.0078217	0.0537646	0.168995	0.0139557	0.0755765	0
YDR368W	YPR1	-0.0735396	0.0483805	0.199231	-0.038664	0.331645	0.599753	0
YDR369C	XRS2	-0.0292753	0.832018	0.930137	0.0143201	0.924839	0.970529	0
YDR370C	DXO1	-0.0424009	0.723063	0.882174	-0.121691	0.355719	0.620747	0
YDR371W	CTS2	0.0287312	0.78542	0.908093	0.0263615	0.817146	0.923198	0
YDR372C	VPS74	-0.0444039	0.338862	0.619457	-0.0745629	0.135458	0.363835	0
YDR373W	FRQ1	0.006811	0.89025	0.952054	-0.0221914	0.677849	0.853362	0
YDR374W-A	WIP1	-0.170831	0.0142751	0.0848026	-0.184495	0.0153906	0.0816337	0
YDR375C	BCS1	0.099554	0.295022	0.576261	0.106839	0.297229	0.564182	0
YDR376W	ARH1	0.0561061	0.456292	0.718832	0.0142618	0.860153	0.944569	0
YDR377W	ATP17	0.0408022	0.150941	0.402468	0.0510007	0.0851817	0.273754	0
YDR378C	LSM6	0.155806	2.49265e-05	0.00039408	0.161162	5.27601e-05	0.000747333	1
YDR379W	RGA2	0.142581	0.169738	0.429471	0.0396387	0.72262	0.876841	0
YDR379C-A	SDH6	-0.0803131	0.210378	0.487269	-0.0555277	0.42945	0.678727	0
YDR381W	YRA1	0.00418858	0.889612	0.952054	-0.0119791	0.710321	0.87141	0
YDR381C-A	YDR381C-A	-0.389792	0.00149845	0.0138895	-0.368547	0.00593088	0.039568	1
YDR382W	RPP2B	-0.0275555	0.223098	0.499968	-0.0224643	0.33368	0.602124	0
YDR383C	NKP1	-0.125308	0.285528	0.5676	-0.0396918	0.754926	0.89288	0
YDR384C	ATO3	0.109697	0.335769	0.616089	0.157057	0.207443	0.466151	0
YDR385W	EFT2	0.0479838	0.0325712	0.152904	0.0482901	0.043866	0.174503	0
YDR386W	MUS81	-0.0494944	0.668059	0.855988	-0.104995	0.422053	0.674151	0
YDR387C	CIN10	-0.0618376	0.558249	0.792119	-0.13177	0.273998	0.543671	0
YDR388W	RVS167	-0.0221907	0.596258	0.813769	-0.0187778	0.692013	0.860699	0
YDR389W	SAC7	-0.0879764	0.26816	0.548757	-0.13469	0.1375	0.366242	0
YDR390C	UBA2	-0.0215528	0.847275	0.935618	-0.172852	0.173748	0.42302	0
YDR391C	YDR391C	-0.072608	0.298985	0.580933	-0.107376	0.168077	0.414529	0
YDR392W	SPT3	0.111611	0.255362	0.536676	0.0385878	0.729379	0.880898	0
YDR393W	SHE9	-0.091521	0.341886	0.621889	-0.155097	0.158424	0.400348	0
YDR394W	RPT3	0.0662471	0.115214	0.344306	0.028596	0.550302	0.777106	0
YDR395W	SXM1	0.100306	0.211559	0.4877	0.104953	0.250415	0.515449	0
YDR397C	NCB2	-0.059979	0.207022	0.483184	-0.120664	0.0238177	0.112977	0
YDR398W	UTP5	0.14169	0.110116	0.334166	0.137703	0.171058	0.418878	0
YDR399W	HPT1	-0.125879	0.00439663	0.0343119	-0.201222	3.9628e-05	0.000586758	1
YDR400W	URH1	0.108516	0.155817	0.408591	0.0654268	0.433921	0.682712	0
YDL188C	PPH22	-0.0543014	0.328406	0.608284	0.0624761	0.422407	0.674151	0
YDL185W	VMA1	0.0406115	0.211213	0.487543	-0.400236	1.89398e-17	1.22137e-15	0
YDR403W	DIT1	0.119338	0.475244	0.733167	0.0855796	0.647503	0.833382	0
YDR404C	RPB7	-0.0471852	0.309745	0.592691	-0.104618	0.0449802	0.176783	0
YDR405W	MRP20	0.32494	6.99387e-05	0.00101712	0.328298	0.000340595	0.00366869	1
YDR406W	PDR15	0.49311	0.000113252	0.00156171	0.484809	0.00085022	0.00789191	1
YDR407C	TRS120	0.0155306	0.891038	0.952054	0.0362692	0.780943	0.907505	0
YDR408C	ADE8	0.00380897	0.959081	0.983505	0.071752	0.418047	0.671533	0
YDR409W	SIZ1	-0.201483	0.136159	0.379136	-0.314316	0.0525008	0.19567	0
YDR410C	STE14	-0.156304	0.0190827	0.104263	-0.186598	0.0168234	0.087621	0
YDR411C	DFM1	-0.0242799	0.624729	0.82998	-0.000955664	0.986916	0.996091	0
YDR412W	RRP17	0.00792022	0.902755	0.955571	-0.000706091	0.992771	0.998335	0
YDR414C	ERD1	0.0204512	0.825297	0.927481	0.0953975	0.394319	0.654217	0
YDR415C	YDR415C	0.00194478	0.982468	0.993597	-0.055583	0.600598	0.807553	0
YDR416W	SYF1	-0.025971	0.81234	0.920314	-0.0555693	0.674103	0.850514	0
YDR418W	RPL12B	-0.0113082	0.617028	0.826244	0.013928	0.585657	0.801538	0
YDR419W	RAD30	-0.12829	0.35533	0.636445	-0.0341658	0.838119	0.93525	0
YDR420W	HKR1	0.194415	0.117208	0.348008	0.132978	0.371247	0.635473	0
YDL184C	RPL41A	0.0657816	0.0104249	0.0667	-0.131286	5.61101e-07	1.1752e-05	0
YDL183C	YDL183C	0.0670793	0.624534	0.829946	-0.205119	0.235468	0.498448	0
YDR421W	ARO80	-0.0642192	0.668472	0.856158	-0.0761254	0.663261	0.845641	0
YDR422C	SIP1	-0.139309	0.223206	0.499968	-0.143206	0.284205	0.551639	0
YDR423C	CAD1	-0.996807	1.96357e-17	1.26624e-15	-1.29319	3.6693e-20	2.90052e-18	1
YDR424C	DYN2	0.0117685	0.882678	0.949134	-0.0375787	0.684995	0.856418	0
YDR425W	SNX41	-0.0513834	0.652107	0.846732	0.1249	0.347731	0.614635	0
YDR427W	RPN9	-0.0388584	0.378741	0.655554	-0.0700925	0.168006	0.414529	0
YDR428C	BNA7	-0.0101801	0.92062	0.965538	-0.0206472	0.861518	0.944629	0
YDR429C	TIF35	-0.118305	0.0370546	0.165849	-0.126371	0.0565719	0.206448	0
YDR430C	CYM1	0.0113103	0.915045	0.963402	0.0305697	0.804587	0.917685	0
YDR432W	NPL3	-0.00300598	0.97211	0.988112	0.0273207	0.783006	0.907505	0
YDR433W	YDR433W	0.0843966	0.390369	0.66523	0.0371998	0.741519	0.886819	0
YDR434W	GPI17	-0.0279617	0.645313	0.844461	0.0090129	0.895321	0.958699	0
YDR435C	PPM1	0.0883369	0.356325	0.636445	0.163046	0.140933	0.371552	0
YDR436W	PPZ2	-0.0199639	0.890604	0.952054	0.00771922	0.962954	0.985974	0
YDR438W	THI74	-0.00251016	0.983462	0.994008	0.0314447	0.816494	0.922887	0
YDR439W	LRS4	0.0403246	0.694473	0.869155	0.0804791	0.482129	0.723417	0
YDR440W	DOT1	-0.057525	0.578307	0.803596	-0.0823863	0.458876	0.705443	0
YDL182W	LYS20	0.0391361	0.391613	0.666653	0.0778848	0.0877828	0.279729	0
YDR441C	APT2	-0.267016	5.85442e-06	0.000107062	-0.224862	0.000304018	0.00332587	1
YDR443C	SSN2	0.299888	0.0477267	0.197666	0.376021	0.0198052	0.0991472	0
YDL181W	INH1	-0.0526489	0.275281	0.556586	0.150317	0.00248533	0.0195202	0
YDR444W	YDR444W	0.0726992	0.402111	0.674683	0.112558	0.213389	0.472153	0
YDR447C	RPS17B	-0.0762682	0.00555458	0.0413096	-0.0131667	0.629677	0.825147	0
YDR449C	UTP6	0.0046954	0.955213	0.982064	0.0383108	0.662349	0.844918	0
YDR450W	RPS18A	0.00272471	0.90898	0.959903	-0.016421	0.483993	0.725175	0
YDR451C	YHP1	-0.295999	0.000128223	0.00172171	-0.267819	0.000812635	0.00764438	1
YDL180W	YDL180W	0.380821	6.1327e-06	0.000111734	0.525573	8.28611e-09	2.34741e-07	1
YDR452W	PPN1	0.0312925	0.467782	0.728041	0.0469806	0.296384	0.563671	0
YDR453C	TSA2	-0.143095	0.110296	0.334348	-0.111127	0.234955	0.497845	0
YDR454C	GUK1	-0.0154735	0.643847	0.843489	0.033307	0.341061	0.607392	0
YDR456W	NHX1	0.0857923	0.121975	0.357108	0.097308	0.0945427	0.293262	0
YDR457W	TOM1	0.0866262	0.323541	0.605846	0.0886215	0.336278	0.604363	0
YDL179W	PCL9	-0.192353	0.0469405	0.195959	-0.0967273	0.347419	0.614635	0
YDR458C	HEH2	-0.0129715	0.861188	0.940018	0.000696109	0.992708	0.998335	0
YDR459C	PFA5	0.184989	0.046028	0.1938	0.222933	0.0231007	0.110671	0
YDR460W	TFB3	0.0598057	0.480249	0.737376	0.102222	0.252801	0.517679	0
YDR461W	MFA1	-0.603137	4.51947e-13	2.01363e-11	-0.484761	8.20403e-12	3.26894e-10	1
YDR461C-A	YDR461C-A	-0.108938	0.323733	0.605846	0.0069608	0.952952	0.983072	0
YDR462W	MRPL28	0.186368	0.0148873	0.0869637	0.0952286	0.245516	0.510633	0
YDR463W	STP1	-0.0966092	0.158631	0.412659	-0.0577559	0.43628	0.685072	0
YDR464W	SPP41	0.0134467	0.889424	0.952054	-0.111464	0.295334	0.562546	0
YDR465C	RMT2	0.201304	0.0350597	0.160515	0.188884	0.0711893	0.243498	0
YDR466W	PKH3	0.0911197	0.358744	0.638187	0.17824	0.104367	0.31019	0
YDR468C	TLG1	-0.101334	0.118231	0.350122	-0.0477567	0.504254	0.738434	0
YDR469W	SDC1	-0.196282	0.0592292	0.22543	-0.155973	0.175897	0.425637	0
YDR470C	UGO1	0.187814	0.105679	0.325948	0.270187	0.035375	0.148946	0
YDR471W	RPL27B	0.00367474	0.891728	0.952054	0.0223845	0.409254	0.666682	0
YDR472W	TRS31	0.10638	0.139683	0.384384	0.0900524	0.25505	0.519751	0
YDR473C	PRP3	-0.083296	0.435039	0.70236	0.0071664	0.951619	0.982905	0
YDL178W	DLD2	-0.00324502	0.959971	0.983654	0.022367	0.745274	0.888708	0
YDL177C	YDL177C	-0.0318439	0.719378	0.880098	0.0222571	0.8161	0.922887	0
YDR475C	JIP4	0.00342587	0.969325	0.987374	0.0263266	0.794013	0.912203	0
YDR476C	YDR476C	-0.202839	0.000159152	0.00207448	-0.228814	0.000139729	0.00172063	1
YDR477W	SNF1	0.0740835	0.300212	0.58254	0.1372	0.0867671	0.277394	0
YDR478W	SNM1	0.304493	0.0313456	0.148747	0.452827	0.00498201	0.0348142	0
YDR479C	PEX29	0.0414365	0.595468	0.813374	0.106495	0.229337	0.49125	0
YDR480W	DIG2	0.391119	0.00259796	0.0224015	0.548621	0.000209552	0.00244527	1
YDR481C	PHO8	0.486917	4.22099e-11	1.55542e-09	0.635676	2.34304e-14	1.14832e-12	1
YDR482C	CWC21	-0.147535	0.0726048	0.259933	-0.0945035	0.334988	0.603373	0
YDR483W	KRE2	-0.0184839	0.575185	0.801531	-0.0148167	0.702928	0.86677	0
YDR484W	VPS52	-0.152222	0.287908	0.569862	-0.143929	0.375573	0.638846	0
YDR485C	VPS72	0.102692	0.372911	0.651695	0.0469555	0.719905	0.875818	0
YDR486C	VPS60	-0.00464447	0.940691	0.974905	-0.0334103	0.636822	0.827648	0
YDR487C	RIB3	-0.0275604	0.598949	0.815464	-0.0108625	0.855151	0.942287	0
YDR489W	SLD5	0.376094	0.00200073	0.0178608	0.466508	0.000406668	0.0042862	1
YDR490C	PKH1	-0.143603	0.247108	0.526584	-0.0312455	0.815943	0.922887	0
YDR492W	IZH1	0.00487384	0.950507	0.98056	0.00133987	0.986759	0.996091	0
YDR493W	MZM1	0.148224	0.147628	0.397759	0.17975	0.0889832	0.282462	0
YDR494W	RSM28	-0.0376692	0.653012	0.846732	8.86729e-05	0.999182	0.999326	0
YDR495C	VPS3	-0.168125	0.192708	0.463653	-0.0923578	0.487904	0.727921	0
YDR496C	PUF6	-0.0873304	0.493894	0.745007	-0.0869307	0.498123	0.733868	0
YDR497C	ITR1	-0.310781	7.58175e-61	2.65415e-58	-0.293137	1.0189e-54	4.53966e-52	1
YDR498C	SEC20	-0.0495923	0.548605	0.784338	-0.0120251	0.886972	0.953921	0
YDR499W	LCD1	-0.0713371	0.49756	0.747789	-0.0756372	0.476092	0.719264	0
YDR500C	RPL37B	0.0772771	0.0149193	0.087047	0.0703185	0.0262612	0.120398	0
YDR502C	SAM2	0.0194537	0.37087	0.650592	0.0224241	0.296954	0.563879	0
YDR503C	LPP1	0.0704347	0.393663	0.668518	0.111249	0.183309	0.434219	0
YDR504C	SPG3	-0.0287398	0.778269	0.905099	-0.0241295	0.815783	0.922887	0
YDR505C	PSP1	0.230946	0.0643981	0.237841	0.283462	0.0254202	0.117644	0
YDL176W	YDL176W	0.491102	0.000571569	0.00626679	0.581785	0.000130179	0.00163173	1
YDL175C	AIR2	0.0548237	0.622734	0.828645	0.0893534	0.452071	0.697767	0
YDL174C	DLD1	0.223017	4.51093e-05	0.000684461	0.318151	4.30598e-08	1.11072e-06	1
YDR507C	GIN4	0.0130206	0.8828	0.949134	0.0336336	0.713068	0.873686	0
YDR510W	SMT3	0.0076158	0.861697	0.940155	0.00119166	0.978877	0.991419	0
YDR511W	SDH7	-0.175773	0.0357958	0.162892	-0.223424	0.0101444	0.0595421	0
YDR512C	EMI1	0.00851979	0.880074	0.947966	0.0282345	0.631125	0.826332	0
YDR513W	GRX2	-0.0262442	0.577871	0.803449	-0.0409592	0.382925	0.645803	0
YDR514C	YDR514C	0.325978	0.000804538	0.00826634	0.343345	0.000631733	0.0061431	1
YDR515W	SLF1	0.443693	1.83252e-05	0.00029739	0.43859	7.23597e-05	0.000963518	1
YDR516C	EMI2	-0.0526865	0.455649	0.718662	-0.067666	0.362103	0.627104	0
YDR517W	GRH1	-0.0431601	0.424206	0.695174	-0.0673592	0.252871	0.517679	0
YDR518W	EUG1	0.138448	0.0406728	0.177663	0.137751	0.0539455	0.199839	0
YDR519W	FPR2	0.019396	0.640817	0.842331	0.0544528	0.212106	0.47119	0
YDR520C	URC2	0.246721	0.0594109	0.225715	0.332105	0.0205066	0.101581	0
YDR524C	AGE1	0.0689077	0.400561	0.673465	0.0896035	0.293138	0.559922	0
YDR524C-B	YDR524C-B	-0.0300605	0.0642392	0.237612	-0.0193646	0.227628	0.490376	0
YDR524C-A	YDR524C-A	-0.289104	0.0965133	0.306442	-0.352674	0.0536973	0.199221	0
YDR525W-A	SNA2	0.082856	0.0166439	0.0941934	0.107473	0.0028767	0.0220637	0
YDL173W	PAR32	-0.00328552	0.952999	0.98069	0.0616352	0.300607	0.5673	0
YDL171C	GLT1	0.11302	0.0856502	0.285559	0.188211	0.00556923	0.0375445	0
YDR527W	RBA50	0.116877	0.258071	0.538673	0.0979751	0.367916	0.633131	0
YDR528W	HLR1	0.417005	3.68802e-06	7.11613e-05	0.442222	2.29149e-06	4.28648e-05	1
YDR529C	QCR7	0.0359553	0.406118	0.677985	0.0126839	0.759808	0.895579	0
YDR530C	APA2	0.274312	0.00046261	0.00524827	0.287036	0.000392045	0.00414992	1
YDR531W	CAB1	0.0962995	0.102694	0.320119	0.060428	0.331462	0.599753	0
YDR532C	KRE28	0.0306852	0.791413	0.909856	-0.0200979	0.869071	0.945674	0
YDR533C	HSP31	0.133772	0.0364733	0.164752	0.0520259	0.361364	0.627104	0
YDR538W	PAD1	-0.232781	0.0306027	0.146326	-0.272951	0.0169366	0.0880235	0
YDR539W	FDC1	0.191628	0.00463977	0.0359234	0.122458	0.0811735	0.265221	0
YDR540C	IRC4	-0.242381	0.0355865	0.162241	-0.272033	0.0244142	0.114376	0
YDR541C	YDR541C	0.184444	0.0419545	0.182125	0.144274	0.137695	0.366364	0
YDL170W	UGA3	0.0778925	0.387366	0.661516	0.0766512	0.422623	0.674151	0
YDL169C	UGX2	-0.0635646	0.564066	0.794622	-0.187624	0.109604	0.319935	0
YDL168W	SFA1	1.21426	2.82899e-117	4.62162e-114	1.31125	5.76382e-132	1.41243e-128	1
YDL167C	NRP1	-0.0387437	0.661659	0.851797	-0.0462487	0.620456	0.819417	0
YDL166C	FAP7	0.0993977	0.131286	0.37322	0.177267	0.0113564	0.0651728	0
YDL165W	CDC36	-0.115224	0.0678979	0.247763	-0.120123	0.0721399	0.244846	0
YDL164C	CDC9	-0.180239	0.164515	0.421841	-0.283961	0.0382465	0.15765	0
YDL161W	ENT1	0.0777304	0.380567	0.656254	0.0282128	0.762164	0.896701	0
YDL160C-A	MHF2	-0.0582717	0.44347	0.708194	-0.0741383	0.359233	0.624548	0
YDL160C	DHH1	0.322416	0.0157249	0.0906601	0.364402	0.00995351	0.0587737	0
YDL159W	STE7	0.113012	0.30689	0.589313	0.0792065	0.498243	0.733868	0
YDL157C	YDL157C	0.250319	2.22764e-06	4.38459e-05	0.22399	5.85133e-05	0.000812391	1
YDL155W	CLB3	0.169012	0.0918285	0.29726	0.0936726	0.376072	0.638846	0
YDL154W	MSH5	-0.0268409	0.875236	0.945664	0.0967412	0.597068	0.806123	0
YDL153C	SAS10	-0.087365	0.326118	0.60727	-0.0840644	0.372894	0.636212	0
YDL150W	RPC53	0.22702	0.00611495	0.0442679	0.255475	0.00311259	0.0234132	1
YDL149W	ATG9	0.0185154	0.888344	0.952024	0.0376205	0.785516	0.908082	0
YDL148C	NOP14	-0.143784	0.223772	0.500179	-0.109918	0.372094	0.636078	0
YDL147W	RPN5	-0.108777	0.0022806	0.0201029	-0.111076	0.00280078	0.0216508	1
YDL146W	LDB17	-0.0990495	0.35789	0.637361	-0.08206	0.464318	0.711355	0
YDL145C	COP1	-0.081728	0.14739	0.397556	-0.105048	0.076482	0.255572	0
YDL144C	YDL144C	0.149021	0.0545359	0.213996	0.177147	0.0300953	0.132166	0
YDL143W	CCT4	0.051004	0.238099	0.514515	0.0362722	0.422897	0.674151	0
YDL142C	CRD1	-0.12664	0.105234	0.324781	-0.100105	0.21527	0.474639	0
YDL141W	BPL1	-0.114655	0.191781	0.462103	-0.0887469	0.328012	0.596729	0
YDL140C	RPO21	0.00786919	0.899558	0.954486	-0.0147817	0.81648	0.922887	0
YDL243C	AAD4	-0.088982	0.487061	0.741332	0.0487172	0.72429	0.878164	0
YDL240W	LRG1	0.0876062	0.408135	0.679369	-0.00581651	0.965329	0.986669	0
YDL138W	RGT2	-0.07305	0.439484	0.704031	-0.0507934	0.5956	0.806123	0
YDL137W	ARF2	-0.0826656	0.00128295	0.0123531	-0.0767193	0.00276703	0.0214576	1
YDL136W	RPL35B	0.00246537	0.940322	0.974905	0.0147266	0.656642	0.841141	0
YDL135C	RDI1	0.0534871	0.294268	0.575501	0.0474026	0.358789	0.623997	0
YDL134C	PPH21	-0.105785	0.0319842	0.150871	-0.13098	0.00889949	0.0543168	0
YDL133C-A	RPL41B	0.0045222	0.89026	0.952054	-0.0162325	0.619859	0.819291	0
YDL133W	SRF1	-0.0818777	0.297992	0.58045	-0.0881513	0.273157	0.543061	0
YDL132W	CDC53	1.35723	2.36934e-35	4.14719e-33	1.35564	5.74883e-35	1.04352e-32	1
YDL131W	LYS21	0.113655	0.000101266	0.00142208	0.129216	1.07595e-05	0.000182464	1
YDL130W-A	STF1	0.104525	0.0237351	0.122814	0.0550638	0.235545	0.498448	0
YDL130W	RPP1B	-0.015079	0.528116	0.770351	-0.00445566	0.848856	0.940381	0
YDL128W	VCX1	-0.0962683	0.0235399	0.12233	-0.0702293	0.10481	0.310378	0
YDL127W	PCL2	0.151711	0.0899315	0.293909	0.173757	0.0557765	0.204306	0
YDL126C	CDC48	0.0125873	0.64381	0.843489	0.0248125	0.369781	0.634335	0
YDL125C	HNT1	-0.610585	1.05077e-66	4.29154e-64	-0.528286	5.61445e-48	1.83443e-45	1
YDL124W	YDL124W	-1.2749	9.17779e-201	4.49803e-197	-1.0729	3.64265e-132	1.41243e-128	1
YDL123W	SNA4	-0.0974804	0.221961	0.499855	-0.0142565	0.861194	0.944629	0
YDL122W	UBP1	0.00994855	0.898312	0.954372	-0.0149056	0.853714	0.942287	0
YDL121C	YDL121C	0.0695923	0.270214	0.55151	0.0849235	0.195947	0.451236	0
YDL120W	YFH1	-0.214035	0.000782993	0.00810345	-0.173702	0.00843554	0.0523324	0
YDL119C	HEM25	-0.0217693	0.854637	0.937655	0.0425873	0.730444	0.881587	0
YDL117W	CYK3	0.0330831	0.775523	0.904315	0.0917124	0.446815	0.693207	0
YDL116W	NUP84	-0.125006	0.108536	0.331218	-0.0360625	0.657599	0.841925	0
YDL115C	IWR1	-0.0139401	0.845126	0.934902	0.0429469	0.569082	0.789835	0
YDL113C	ATG20	-0.122845	0.264322	0.544624	-0.0666338	0.567559	0.788884	0
YDL112W	TRM3	-0.0709051	0.610503	0.822318	0.0246528	0.866811	0.944751	0
YDL111C	RRP42	0.041417	0.56316	0.794214	0.147443	0.0490499	0.186931	0
YDL110C	TMA17	0.0471247	0.256625	0.537717	0.0965818	0.026369	0.120667	0
YDL108W	KIN28	0.121664	0.212006	0.488272	0.16012	0.117943	0.335484	0
YDL107W	MSS2	-0.0957188	0.363494	0.642904	-0.0567361	0.609676	0.814055	0
YDL106C	PHO2	0.141852	0.124835	0.362409	0.259123	0.00794193	0.0503537	0
YDL105W	NSE4	-0.452137	0.0102313	0.0658917	-0.561655	0.00300092	0.0228023	0
YDL104C	QRI7	0.190278	0.0980503	0.31063	0.217509	0.0671068	0.2346	0
YDL103C	QRI1	-0.0415126	0.527159	0.77006	-0.0234176	0.729187	0.880898	0
YDL102W	POL3	-0.439068	0.00373223	0.0301345	-0.436124	0.00526831	0.0363662	1
YDL101C	DUN1	-0.0573198	0.583101	0.807312	-0.0921323	0.393208	0.653037	0
YDL100C	GET3	-0.0370545	0.286136	0.567754	-0.0258565	0.465173	0.711723	0
YDL099W	BUG1	-0.262236	0.00249223	0.0216568	-0.291675	0.00123062	0.0109262	1
YDL098C	SNU23	-0.172262	0.235719	0.512358	-0.248429	0.0998991	0.302226	0
YDL097C	RPN6	-0.0559407	0.195839	0.468624	-0.090894	0.0436446	0.174046	0
YDL095W	PMT1	-0.0358792	0.38025	0.655969	-0.0577261	0.167825	0.414529	0
YDL093W	PMT5	-0.0878104	0.307415	0.589453	-0.0710354	0.42405	0.674151	0
YDL092W	SRP14	0.119282	0.0778949	0.270949	0.062226	0.376371	0.638846	0
YDL091C	UBX3	-0.0970471	0.320288	0.602354	-0.125003	0.21735	0.477896	0
YDL090C	RAM1	-0.0266914	0.804756	0.915106	-0.0640248	0.568798	0.789835	0
YDL089W	NUR1	-0.105668	0.257161	0.538277	-0.168538	0.0797856	0.262612	0
YDL088C	ASM4	0.172568	0.0327495	0.153593	0.158467	0.0586366	0.212401	0
YDL086W	YDL086W	-0.127713	0.0313133	0.148747	-0.141512	0.019367	0.0977523	0
YDL085C-A	YDL085C-A	0.113466	0.103575	0.321236	0.151741	0.0362609	0.151247	0
YDL085W	NDE2	-0.15192	0.384099	0.659128	-0.234896	0.19879	0.453361	0
YDL084W	SUB2	-0.0290616	0.355958	0.636445	-0.0382755	0.232437	0.494866	0
YDL083C	RPS16B	-0.01443	0.557578	0.792091	-0.0037513	0.877129	0.949196	0
YDL082W	RPL13A	0.0241549	0.33499	0.61563	0.0135903	0.588771	0.803164	0
YDL081C	RPP1A	0.0135839	0.584696	0.808225	0.0212954	0.390054	0.650002	0
YDL080C	THI3	-0.168489	0.0464807	0.19487	-0.175706	0.0443475	0.175265	0
YDL078C	MDH3	-0.0338484	0.466389	0.726796	-0.0095034	0.848308	0.940198	0
YDL077C	VAM6	0.0264693	0.823732	0.92658	0.06614	0.608405	0.813658	0
YDL076C	RXT3	0.0874679	0.237601	0.513667	0.0489017	0.541612	0.772088	0
YDL075W	RPL31A	0.00534488	0.876304	0.946061	0.0188963	0.607543	0.813321	0
YDL074C	BRE1	-0.133038	0.0512414	0.205679	-0.162995	0.0273598	0.124043	0
YDL073W	AHK1	0.0543025	0.64978	0.846034	0.0660476	0.606129	0.811999	0
YDL072C	YET3	-0.040051	0.229144	0.505309	-0.051308	0.148142	0.383291	0
YDL070W	BDF2	-0.00324333	0.956011	0.982472	0.00679087	0.913457	0.967132	0
YDL239C	ADY3	-0.325174	0.0165018	0.0936055	-0.15598	0.310223	0.577653	0
YDL238C	GUD1	-0.124187	0.418374	0.689227	-0.0946541	0.58316	0.800094	0
YDL237W	AIM6	-0.110609	0.0157127	0.0906601	-0.0481535	0.34712	0.614609	0
YDL236W	PHO13	0.0599383	0.126496	0.364832	0.171769	5.33356e-05	0.000751419	0
YDL235C	YPD1	0.119695	0.0261103	0.130312	0.116444	0.0453969	0.177708	0
YDL069C	CBS1	0.0622839	0.609085	0.822123	0.0705089	0.582451	0.800094	0
YDL067C	COX9	-0.0369743	0.174274	0.43523	-0.0529748	0.0573069	0.208354	0
YDL066W	IDP1	-0.0352433	0.391557	0.666653	0.0150158	0.723407	0.877362	0
YDL065C	PEX19	0.24583	0.0239375	0.122983	0.229156	0.0491639	0.18722	0
YDL064W	UBC9	0.0317509	0.522561	0.767017	-0.00776229	0.884015	0.952838	0
YDL063C	SYO1	0.0302634	0.800818	0.91353	0.00825141	0.949559	0.981346	0
YDL061C	RPS29B	-0.00739192	0.742366	0.890003	-0.0149009	0.516956	0.749976	0
YDL060W	TSR1	0.384324	0.000374851	0.00437416	0.276412	0.0184151	0.0937202	0
YDL059C	RAD59	0.0885479	0.34536	0.625965	0.0896625	0.386264	0.647799	0
YDL058W	USO1	-0.227636	0.023806	0.122814	-0.2613	0.0183155	0.09331	0
YDL057W	YDL057W	-0.297763	0.0214721	0.11389	-0.296814	0.0372967	0.154384	0
YDL056W	MBP1	0.214382	0.0966577	0.306473	0.248504	0.0826314	0.268093	0
YDL055C	PSA1	0.0111102	0.742025	0.890003	0.0123182	0.71999	0.875818	0
YDL054C	MCH1	0.0143375	0.876718	0.946061	0.0526535	0.590183	0.8034	0
YDL053C	PBP4	-0.0622391	0.210599	0.48732	-0.0503637	0.339815	0.606499	0
YDL052C	SLC1	-0.171913	0.000158426	0.00207052	-0.158049	0.00101942	0.00925222	1
YDL051W	LHP1	0.0945445	0.0613189	0.23011	0.118866	0.0256712	0.118358	0
YDL049C	KNH1	0.105536	0.234182	0.5101	0.0990397	0.294655	0.561908	0
YDL048C	STP4	-0.124532	0.190808	0.461152	-0.117933	0.240827	0.503753	0
YDL047W	SIT4	0.520325	1.82697e-06	3.62509e-05	0.664875	1.56704e-08	4.29055e-07	1
YDL234C	GYP7	0.0269464	0.761078	0.899456	0.0817213	0.409957	0.667117	0
YDL232W	OST4	-0.0709862	0.0414511	0.180259	-0.0339179	0.387975	0.648256	0
YDL046W	NPC2	-0.0161234	0.704372	0.873011	0.0155519	0.719731	0.875818	0
YDL045W-A	MRP10	0.140095	0.109998	0.334016	0.212652	0.0226074	0.109054	0
YDL045C	FAD1	-0.00303046	0.96781	0.986325	-0.0401261	0.614559	0.816619	0
YDL044C	MTF2	-0.078304	0.514369	0.761609	-0.0882753	0.502955	0.738019	0
YDL043C	PRP11	-0.0673097	0.501139	0.750866	-0.00587091	0.957248	0.984631	0
YDL042C	SIR2	0.0201441	0.853356	0.937461	-0.0307705	0.796945	0.913598	0
YDL040C	NAT1	0.00429019	0.951826	0.980639	0.0165978	0.831549	0.930249	0
YDL035C	GPR1	-0.00124821	0.989004	0.996679	0.035862	0.725186	0.878818	0
YDL031W	DBP10	-0.139893	0.187941	0.457347	-0.217223	0.0660561	0.23174	0
YDL030W	PRP9	0.182413	0.17497	0.435958	0.229792	0.1236	0.346086	0
YDL029W	ARP2	0.0386724	0.226755	0.503546	0.0106659	0.758838	0.895505	0
YDL028C	MPS1	0.0376306	0.778411	0.905099	0.0580274	0.690782	0.860699	0
YDL231C	BRE4	0.584214	1.88781e-11	7.28517e-10	0.578098	7.03182e-10	2.2673e-08	1
YDL230W	PTP1	0.0161384	0.898612	0.954372	-0.0514132	0.714798	0.874041	0
YDL027C	MRX9	0.0554256	0.307139	0.589313	0.000945688	0.987379	0.996324	0
YDL025C	RTK1	0.190919	0.0893552	0.29293	0.133369	0.279089	0.548108	0
YDL022W	GPD1	0.00153821	0.967732	0.986325	0.0055109	0.886937	0.953921	0
YDL021W	GPM2	-0.255615	0.00157764	0.0145613	-0.249403	0.00347991	0.0256467	1
YDL020C	RPN4	0.273285	7.29145e-05	0.00105726	0.306569	2.69455e-05	0.000420573	1
YDL019C	OSH2	0.0521841	0.482835	0.739492	0.0521718	0.511442	0.744784	0
YDL018C	ERP3	-0.0854712	0.288129	0.569862	-0.0961939	0.262971	0.530161	0
YDL017W	CDC7	0.0682645	0.660767	0.851392	0.0260017	0.871823	0.946572	0
YDL015C	TSC13	-0.0652413	0.0632274	0.234904	-0.0626827	0.0857554	0.275418	0
YDL014W	NOP1	0.0832593	0.0360165	0.163452	0.0698302	0.0880363	0.280355	0
YDL013W	SLX5	0.0285916	0.801036	0.91353	-0.0444783	0.70724	0.869462	0
YDL012C	YDL012C	-0.536258	2.00481e-17	1.27193e-15	-0.498493	1.97595e-14	1.00876e-12	1
YDL010W	GRX6	-0.118288	0.061723	0.231449	-0.101527	0.122261	0.344151	0
YDL008W	APC11	-0.229411	0.0050992	0.0385666	-0.229529	0.0071988	0.0466684	1
YDL007W	RPT2	0.0583636	0.159172	0.413629	0.0616078	0.148202	0.383291	0
YDL006W	PTC1	0.0457316	0.577874	0.803449	0.0720278	0.393434	0.653109	0
YDL005C	MED2	-0.0610263	0.425789	0.696758	-0.0433729	0.580906	0.799276	0
YDL004W	ATP16	-0.0323802	0.356105	0.636445	-0.0206912	0.555883	0.780395	0
YDL003W	MCD1	0.164895	0.092003	0.297397	0.168171	0.0914057	0.286982	0
YDL002C	NHP10	0.0690353	0.298787	0.580933	0.0837091	0.216756	0.477019	0
YDL001W	RMD1	-0.0479622	0.652094	0.846732	-0.0198871	0.854609	0.942287	0
YDR001C	NTH1	0.135403	0.00781336	0.0537646	0.136514	0.00840981	0.0523051	0
YDR002W	YRB1	-0.097876	0.00101554	0.0100753	-0.105727	0.000489356	0.00495524	1
YDR003W	RCR2	-0.193277	0.108364	0.330898	-0.162975	0.184109	0.434588	0
YDR003W-A	YDR003W-A	0.000730637	0.99345	0.997368	0.00659349	0.942084	0.97793	0
YDR004W	RAD57	-0.134275	0.16379	0.420942	-0.146886	0.135712	0.363835	0
YDR005C	MAF1	-0.0665989	0.326648	0.607553	-0.077326	0.26474	0.531977	0
YDR006C	SOK1	0.0769748	0.42862	0.698825	0.13501	0.174048	0.42333	0
YDR007W	TRP1	0.0131318	0.821618	0.925264	0.0131788	0.82461	0.927568	0
YDR011W	SNQ2	-0.244345	0.0243738	0.124174	-0.232869	0.0357319	0.149677	0
YDL229W	SSB1	-0.0996772	7.846e-05	0.00113431	-0.097523	0.000165689	0.00197097	1
YDL227C	HO	-4.07664	4.87152e-22	4.18865e-20	-2.60176	1.83631e-16	1.12497e-14	1
YDR012W	RPL4B	-0.00736505	0.796556	0.912417	-0.00971573	0.741493	0.886819	0
YDR013W	PSF1	0.0283681	0.758574	0.89834	0.0551269	0.571151	0.790738	0
YDR014W	RAD61	0.210728	0.0924274	0.298168	0.243743	0.0646895	0.228582	0
YDR016C	DAD1	0.0184468	0.79087	0.909532	-0.0436956	0.553406	0.778897	0
YDR017C	KCS1	-0.168353	0.132892	0.375609	-0.181348	0.125735	0.349046	0
YDR019C	GCV1	0.187266	0.00179373	0.0162197	0.221164	0.000408275	0.00429389	1
YDR020C	DAS2	-0.0359786	0.783911	0.907771	0.014743	0.915141	0.967773	0
YDR021W	FAL1	-0.304384	0.0821027	0.279434	-0.221215	0.228023	0.490579	0
YDR022C	ATG31	0.00385071	0.964506	0.985026	0.026749	0.768765	0.90029	0
YDR023W	SES1	0.0463805	0.141197	0.386505	0.0301107	0.360239	0.626076	0
YDR025W	RPS11A	0.0167309	0.488771	0.742162	0.0187516	0.441835	0.690287	0
YDR026C	NSI1	-0.0497976	0.480475	0.737491	-0.011341	0.878538	0.949651	0
YDR027C	VPS54	-0.0622429	0.491962	0.743481	-0.0811555	0.39595	0.655524	0
YDR028C	REG1	-0.0531985	0.498879	0.749451	-0.0151645	0.853409	0.942287	0
YDR030C	RAD28	0.161536	0.196168	0.468624	0.174874	0.178272	0.428101	0
YDR031W	MIX14	-0.050894	0.512207	0.759514	-0.104574	0.19672	0.451236	0
YDR032C	PST2	-0.0180861	0.673069	0.859711	0.0724057	0.0953638	0.294109	0
YDR033W	MRH1	-0.707661	1.12932e-91	7.90689e-89	-0.658947	4.77814e-76	3.90294e-73	1
YDR034C	LYS14	-0.0357076	0.457925	0.719785	-0.0202544	0.684136	0.855767	0
YDL226C	GCS1	-0.107082	0.0490698	0.200766	-0.134747	0.0259594	0.11935	0
YDR035W	ARO3	0.0163712	0.749072	0.894714	0.0101276	0.861699	0.944629	0
YDR036C	EHD3	0.00810284	0.9315	0.970016	0.141727	0.183825	0.434588	0
YDR037W	KRS1	0.0144244	0.71592	0.878652	0.0668088	0.13179	0.359033	0
YDR038C	ENA5	-1.5722	2.0243e-17	1.27193e-15	-2.30487	1.45489e-20	1.18841e-18	1
YDL225W	SHS1	0.00906572	0.910837	0.960829	-0.0427759	0.634139	0.826372	0
YDL224C	WHI4	0.0615844	0.327406	0.607963	0.110463	0.114656	0.330482	0
YDR040C	ENA1	-1.99273	3.58954e-17	2.19904e-15	-1.88045	4.30932e-16	2.51428e-14	1
YDR041W	RSM10	-0.000151096	0.9983	0.998912	0.021931	0.783508	0.907505	0
YDR043C	NRG1	0.0999876	0.0937475	0.300495	0.176446	0.00924336	0.0556532	0
YDR044W	HEM13	-0.216797	0.00938366	0.0615412	-0.231178	0.0142403	0.07661	0
YDR045C	RPC11	0.0871108	0.187768	0.457153	0.160058	0.0318068	0.137708	0
YDR047W	HEM12	0.0237204	0.681119	0.861485	-0.0346481	0.594945	0.806123	0
YDR049W	VMS1	0.228269	0.0465434	0.19487	0.144217	0.258475	0.523786	0
YDR050C	TPI1	0.00722143	0.623359	0.828645	0.00566828	0.714841	0.874041	0
YDR051C	DET1	-0.120268	0.0845433	0.283866	-0.169788	0.0243757	0.114376	0
YDR052C	DBF4	0.00222924	0.981326	0.993597	-0.0368471	0.720856	0.876542	0
YDR054C	CDC34	-0.0200675	0.750109	0.894714	-0.0818266	0.224736	0.486498	0
YDR055W	PST1	0.0448396	0.524045	0.767587	-0.0745572	0.292577	0.559801	0
YDR056C	EMC10	-0.0310418	0.518233	0.764097	-0.0580173	0.247636	0.512097	0
YDR057W	YOS9	-0.0862244	0.36244	0.642198	-0.0752565	0.4478	0.693358	0
YDR058C	TGL2	0.0308259	0.77549	0.904315	0.0550968	0.626134	0.822359	0
YDR059C	UBC5	-0.100237	0.166919	0.424531	-0.0898421	0.235058	0.497847	0
YDR060W	MAK21	-0.00655931	0.935779	0.97187	0.023	0.785452	0.908082	0
YDR061W	YDR061W	-0.200912	0.0443035	0.189469	-0.203826	0.0495179	0.187813	0
YDR062W	LCB2	-0.0333869	0.456037	0.718662	-0.0239322	0.598728	0.807218	0
YDR063W	AIM7	0.224248	0.000165882	0.00215646	0.252654	2.76102e-05	0.000426869	1
YDR064W	RPS13	0.0370761	0.0578734	0.221939	0.0255488	0.185796	0.436314	0
YDR065W	RRG1	-0.0920039	0.577114	0.802849	-0.0990759	0.557054	0.781151	0
YDR066C	RTR2	0.0668572	0.620523	0.827308	0.0899279	0.515185	0.748737	0
YDR067C	OCA6	-0.0778617	0.350199	0.631002	-0.0926092	0.278909	0.548108	0
YDR068W	DOS2	0.154605	0.0443622	0.18953	0.151992	0.0550258	0.202213	0
YDR069C	DOA4	0.0397244	0.737418	0.887415	0.00104964	0.993201	0.998335	0
YDR070C	FMP16	-0.159308	0.143747	0.390956	-0.114025	0.298721	0.565253	0
YDR071C	PAA1	0.14643	0.000441513	0.00505573	0.156263	0.000275424	0.00307484	1
YDR072C	IPT1	-0.0668041	0.298257	0.580524	-0.0684543	0.301402	0.567782	0
YDR073W	SNF11	0.192635	0.00202868	0.0180446	0.204301	0.00151607	0.0129447	1
YDR074W	TPS2	-0.00551199	0.936058	0.971953	0.0033781	0.961544	0.985885	0
YDR075W	PPH3	-0.00935911	0.905864	0.958058	-0.0242747	0.767418	0.899861	0
YDR076W	RAD55	0.040902	0.813801	0.921471	0.143143	0.418696	0.671829	0
YDR078C	SHU2	-0.240471	0.0838194	0.282919	-0.187979	0.179365	0.429652	0
YDR079W	PET100	-0.228327	0.00925177	0.0607814	-0.13871	0.115641	0.331631	0
YDR079C-A	TFB5	0.248449	0.0163897	0.0931854	0.218563	0.0370266	0.153656	0
YDR080W	VPS41	0.0123703	0.89803	0.954372	0.0244001	0.802463	0.916885	0
YDR081C	PDC2	-0.145098	0.326554	0.607553	-0.169953	0.255897	0.520395	0
YDR082W	STN1	-0.0987572	0.399185	0.672998	-0.0980258	0.408307	0.665705	0
YDR083W	RRP8	0.0454127	0.610572	0.822318	0.0431776	0.631769	0.826332	0
YDR084C	TVP23	-0.0777986	0.120383	0.354993	-0.0609455	0.229292	0.49125	0
YDL222C	FMP45	-0.0997401	0.452179	0.71488	-0.269598	0.0658101	0.231374	0
YDL219W	DTD1	0.115064	0.103298	0.321232	0.101299	0.197428	0.452358	0
YDL217C	TIM22	-0.140603	0.0832345	0.281721	-0.249724	0.00577455	0.0387686	0
YDR085C	AFR1	0.0994166	0.223412	0.500179	0.127529	0.1603	0.402475	0
YDR086C	SSS1	-0.0301123	0.232096	0.509121	-0.0452239	0.0993567	0.301329	0
YDR087C	RRP1	0.117446	0.156756	0.410617	0.130409	0.157818	0.399895	0
YDR088C	SLU7	-0.0106595	0.939173	0.974729	0.0241002	0.877039	0.949196	0
YDR089W	VTC5	-0.676795	3.40939e-08	9.03211e-07	-0.768877	2.5909e-08	6.82689e-07	1
YDR090C	YDR090C	-0.0634384	0.398226	0.672307	-0.0234105	0.779716	0.907505	0
YDR091C	RLI1	0.079575	0.215547	0.492952	0.1223	0.0845684	0.272498	0
YDR092W	UBC13	0.00366055	0.940484	0.974905	0.0357934	0.521615	0.754865	0
YDR093W	DNF2	-0.0460894	0.731905	0.88531	0.0013615	0.992899	0.998335	0
YDR099W	BMH2	0.00265337	0.914792	0.963342	-0.00695455	0.793739	0.912203	0
YDR100W	TVP15	-0.023112	0.649072	0.846034	-0.0660354	0.23574	0.498639	0
YDR101C	ARX1	0.0239297	0.76713	0.900892	0.0386469	0.655847	0.840342	0
YDR103W	STE5	0.0266761	0.779876	0.90607	0.0552173	0.595889	0.806123	0
YDR105C	TMS1	-0.0137511	0.835712	0.93089	-0.024112	0.749518	0.890732	0
YDR107C	TMN2	0.114397	0.343832	0.624118	0.0872468	0.524482	0.757584	0
YDR108W	TRS85	0.15459	0.166791	0.424424	0.137613	0.278811	0.548108	0
YDR109C	YDR109C	0.105109	0.375646	0.653159	0.197418	0.14637	0.38036	0
YDR110W	FOB1	-0.0838247	0.488833	0.742162	0.107453	0.442113	0.690502	0
YDR111C	ALT2	0.0633408	0.649447	0.846034	-0.0973654	0.549403	0.776578	0
YDR113C	PDS1	0.113874	0.326833	0.607666	0.0617644	0.644055	0.83225	0
YDR115W	MRX14	-0.0836246	0.162584	0.419804	-0.104723	0.132215	0.359954	0
YDR116C	MRPL1	0.0859555	0.278853	0.559504	0.0932948	0.308731	0.575976	0
YDR117C	TMA64	0.023372	0.761532	0.899473	-0.100873	0.26363	0.530399	0
YDR118W	APC4	0.131284	0.349977	0.631002	0.1516	0.354968	0.620434	0
YDR119W	VBA4	-0.0439974	0.588219	0.809405	-0.191548	0.0464676	0.180315	0
YDR119W-A	COX26	-0.26741	0.0193742	0.105409	-0.286958	0.0265121	0.121209	0
YDR120C	TRM1	-0.452931	2.43114e-08	6.69384e-07	-0.496484	6.56049e-08	1.64887e-06	1
YDR121W	DPB4	-0.262867	0.011845	0.0740466	-0.33084	0.00535138	0.0367327	0
YDR122W	KIN1	0.0263171	0.731222	0.88531	0.00365665	0.966975	0.987298	0
YDR123C	INO2	0.0612232	0.450412	0.71393	0.1393	0.135072	0.363332	0
YDR124W	YDR124W	-0.146683	0.300663	0.582935	-0.172429	0.281202	0.548801	0
YDR126W	SWF1	0.195054	0.170109	0.430102	0.0761044	0.636617	0.827648	0
YDR127W	ARO1	0.0331171	0.6082	0.821607	-0.00130528	0.985591	0.996091	0
YDR128W	MTC5	0.108922	0.27445	0.556047	0.138857	0.19472	0.449305	0
YDR129C	SAC6	-0.0604445	0.0825004	0.280035	-0.154242	3.35456e-05	0.00051058	0
YDR130C	FIN1	0.283533	0.0291699	0.140988	0.180132	0.195348	0.450542	0
YDR131C	YDR131C	-0.0758019	0.628792	0.834021	-0.161163	0.32466	0.59319	0
YDR132C	YDR132C	-0.497447	0.00513893	0.0387476	-0.466494	0.00936244	0.0559317	0
YDR133C	YDR133C	1.28983	3.01694e-69	1.34419e-66	0.937024	1.89229e-45	5.79631e-43	1
YDR135C	YCF1	0.0215803	0.787586	0.90951	-0.0360126	0.667168	0.847187	0
YDR137W	RGP1	-0.0229331	0.818424	0.923991	-0.13883	0.1895	0.441837	0
YDR139C	RUB1	0.0239824	0.759439	0.89834	0.0181116	0.827512	0.928922	0
YDR140W	MTQ2	-0.20782	0.00828228	0.0564139	-0.246532	0.00293118	0.0223765	0
YDR141C	DOP1	0.0594915	0.463831	0.724884	0.0331315	0.699675	0.864424	0
YDR142C	PEX7	0.0386171	0.742158	0.890003	0.011655	0.925341	0.970529	0
YDR143C	SAN1	0.0408341	0.697482	0.870301	-0.0276978	0.80459	0.917685	0
YDR144C	MKC7	-0.48824	2.3684e-06	4.6373e-05	-0.623706	1.3336e-08	3.69265e-07	1
YDR145W	TAF12	0.191836	0.00903543	0.0602485	0.177074	0.0234725	0.112123	0
YDR146C	SWI5	-0.0249058	0.809034	0.9182	-0.0324157	0.765405	0.898288	0
YDR147W	EKI1	-0.0694202	0.401312	0.673803	-0.133961	0.127783	0.352229	0
YDR148C	KGD2	-0.04837	0.383019	0.657965	-0.0484795	0.39931	0.658929	0
YDR150W	NUM1	0.132639	0.123464	0.359748	0.127755	0.175363	0.425051	0
YDR151C	CTH1	0.0327853	0.667178	0.855531	0.094699	0.253955	0.51903	0
YDR152W	GIR2	-0.126632	0.0448491	0.190595	-0.108132	0.114369	0.330108	0
YDR153C	ENT5	-0.00948031	0.892603	0.952054	-0.0640521	0.403951	0.662451	0
YDR154C	YDR154C	0.0742621	0.00429309	0.0338271	0.0595116	0.0291516	0.129531	0
YDR155C	CPR1	0.0295361	0.144703	0.392469	0.0242975	0.232736	0.495284	0
YDR156W	RPA14	0.0727532	0.21119	0.487543	0.0238084	0.707652	0.869462	0
YDR158W	HOM2	-0.0405527	0.110867	0.335165	-0.0627638	0.0206991	0.102058	0
YDR159W	SAC3	0.00233761	0.979148	0.992462	0.000438974	0.996442	0.998479	0
YDR160W	SSY1	0.392965	0.0259991	0.12989	0.44055	0.0238355	0.112977	0
YDR161W	ACL4	-0.170868	0.0585765	0.223759	-0.17665	0.0753021	0.253212	0
YDR162C	NBP2	0.106713	0.157277	0.411319	0.184141	0.0256664	0.118358	0
YDR163W	CWC15	-0.139193	0.19101	0.461152	-0.270993	0.0225388	0.109045	0
YDR164C	SEC1	-0.0576022	0.717467	0.878857	-0.0291501	0.867043	0.944751	0
YDR165W	TRM82	-0.0597649	0.377898	0.655266	-0.072435	0.331877	0.599753	0
YDR166C	SEC5	-0.00541211	0.956883	0.982631	0.00436891	0.968377	0.987298	0
YDR167W	TAF10	0.0218197	0.721228	0.881042	-0.0148289	0.825636	0.928296	0
YDL215C	GDH2	-0.05308	0.565355	0.795066	-0.0741419	0.447527	0.693358	0
YDL213C	NOP6	0.0566561	0.653925	0.846732	-0.0149186	0.911037	0.966031	0
YDL212W	SHR3	0.0729659	0.0311823	0.148518	0.065335	0.0676234	0.235385	0
YDL211C	YDL211C	0.147243	0.23197	0.509121	0.149487	0.250196	0.515214	0
YDR171W	HSP42	-0.0984118	0.221245	0.499855	-0.0307417	0.717032	0.874564	0
YDR172W	SUP35	-0.0939844	0.0299403	0.144002	-0.169886	0.0002424	0.00273733	0
YDR173C	ARG82	-0.0723576	0.535377	0.775608	-0.119936	0.335527	0.603456	0
YDR174W	HMO1	-0.0534616	0.0581448	0.222805	-0.0592802	0.0448322	0.176342	0
YDR175C	RSM24	-0.000912046	0.990916	0.996703	0.00258978	0.975415	0.989857	0
YDR176W	NGG1	-0.0657862	0.496977	0.747372	-0.0218432	0.829474	0.929838	0
YDR177W	UBC1	0.284496	1.91271e-12	8.22298e-11	0.320485	4.62559e-14	2.24456e-12	1
YDR178W	SDH4	0.102898	0.047693	0.197666	0.111641	0.0372098	0.154155	0
YDR179W-A	NVJ3	-0.0817744	0.56659	0.79605	-0.0679789	0.650075	0.835567	0
YDR181C	SAS4	0.077819	0.486295	0.741181	0.111585	0.339345	0.606318	0
YDR182W	CDC1	0.0943489	0.1745	0.43523	0.090089	0.223963	0.485253	0
YDR183W	PLP1	0.236112	0.0408009	0.178064	0.267756	0.0305239	0.133212	0
YDR184C	ATC1	-0.0215166	0.891974	0.952054	0.00745649	0.96479	0.986474	0
YDR186C	SND1	-0.0272675	0.733376	0.885421	0.012464	0.889022	0.955085	0
YDR188W	CCT6	-0.442335	3.38388e-15	1.74572e-13	-0.418164	2.02834e-09	6.21307e-08	1
YDR189W	SLY1	-0.134235	0.106774	0.327881	-0.125877	0.219993	0.481077	0
YDR190C	RVB1	0.0208508	0.677516	0.860496	0.0461932	0.450034	0.695778	0
YDR191W	HST4	-0.18944	0.226156	0.502451	-0.1506	0.437241	0.685734	0
YDR192C	NUP42	0.0057315	0.961634	0.984218	0.00940714	0.946714	0.979904	0
YDR194C	MSS116	-0.0126139	0.836894	0.93089	-0.0102303	0.886713	0.953921	0
YDR195W	REF2	-0.0862629	0.432765	0.701383	-0.0140663	0.913912	0.967335	0
YDR196C	CAB5	0.0798731	0.258702	0.539073	0.0652469	0.43523	0.684113	0
YDR197W	CBS2	0.137135	0.145568	0.393508	0.156337	0.159264	0.40148	0
YDR198C	RKM2	0.0340477	0.775459	0.904315	0.0114513	0.933082	0.974093	0
YDR200C	VPS64	-0.0817875	0.474855	0.733167	-0.140667	0.281676	0.548905	0
YDR201W	SPC19	-0.0280462	0.719014	0.879872	-0.0540626	0.539079	0.77059	0
YDR202C	RAV2	0.104812	0.161072	0.417237	0.160813	0.0572386	0.20826	0
YDR204W	COQ4	-0.0334633	0.650245	0.846216	-0.032206	0.697082	0.862509	0
YDR205W	MSC2	-0.111736	0.250156	0.529826	-0.154639	0.158002	0.399895	0
YDR206W	EBS1	-0.19645	0.189983	0.460034	-0.25935	0.126353	0.350008	0
YDR208W	MSS4	0.0364013	0.539465	0.777165	0.026532	0.680652	0.854541	0
YDR210W	YDR210W	-0.530233	4.80915e-23	4.20886e-21	-0.649085	1.02267e-31	1.61681e-29	1
YDL210W	UGA4	-0.388808	0.0314387	0.149015	-0.434847	0.0202356	0.100985	0
YDL209C	CWC2	0.0462567	0.628521	0.833975	0.0501495	0.619096	0.818723	0
YDL208W	NHP2	0.20128	8.28553e-06	0.000146597	0.152331	0.00127223	0.0112548	1
YDL207W	GLE1	-0.0762033	0.230663	0.506975	-0.141106	0.0351958	0.148446	0
YDR211W	GCD6	-0.0480427	0.495104	0.745699	0.0328643	0.669373	0.848577	0
YDR212W	TCP1	0.0014871	0.970828	0.987905	0.0345272	0.436372	0.685072	0
YDR214W	AHA1	0.0204345	0.640092	0.842043	0.115349	0.0138227	0.0750983	0
YDR217C	RAD9	-0.143696	0.286117	0.567754	-0.0895368	0.542199	0.772251	0
YDR219C	MFB1	-0.0502259	0.593417	0.811769	0.00752425	0.943011	0.97793	0
YDR221W	GTB1	-0.269151	0.0154531	0.089628	-0.263733	0.0336451	0.143495	0
YDR222W	YDR222W	0.222523	0.0361901	0.163774	0.157077	0.183965	0.434588	0
YDR224C	HTB1	-0.186956	0.000281886	0.00336354	-0.121941	0.0292746	0.129724	0
YDR225W	HTA1	-0.150005	0.000446331	0.00508717	-0.0924851	0.0488579	0.186345	0
YDR226W	ADK1	0.0177272	0.377064	0.654388	0.00766431	0.731692	0.882124	0
YDR227W	SIR4	-0.196781	0.0957159	0.305009	-0.192856	0.147388	0.382194	0
YDR228C	PCF11	-0.158665	0.158229	0.412489	-0.116946	0.35609	0.621066	0
YDR229W	IVY1	0.0558809	0.600868	0.816105	0.0881844	0.446288	0.69279	0
YDR231C	COX20	0.115664	0.0692362	0.251353	0.207368	0.00255385	0.0199943	0
YDR232W	HEM1	0.0945326	0.0825919	0.280127	0.130087	0.026752	0.121851	0
YDR233C	RTN1	0.0460631	0.0369676	0.165849	0.0406479	0.0779352	0.258072	0
YDR234W	LYS4	0.0126813	0.844667	0.934902	0.000396997	0.995371	0.998335	0
YDR235W	PRP42	-0.117591	0.166057	0.423218	-0.0946846	0.300091	0.566832	0
YDR236C	FMN1	-0.00415109	0.949766	0.980165	0.00666915	0.92482	0.970529	0
YDR237W	MRPL7	0.106654	0.214506	0.491488	0.18622	0.0442603	0.175076	0
YDR238C	SEC26	-0.0130846	0.754951	0.896755	-0.00363277	0.93572	0.974635	0
YDR239C	YDR239C	-0.0888886	0.51576	0.761987	-0.0512902	0.728182	0.880812	0
YDL206W	YDL206W	-0.0206204	0.832571	0.930242	-0.0196877	0.850006	0.94051	0
YDL205C	HEM3	-0.518124	0.000241502	0.00296642	-0.496262	0.00100228	0.00914744	1
YDL204W	RTN2	-0.195639	0.0503825	0.203398	-0.224266	0.0284806	0.127941	0
YDL203C	ACK1	-0.138377	0.131677	0.373268	-0.141888	0.147004	0.3814	0
YDR240C	SNU56	-0.200423	0.0860622	0.286348	-0.150764	0.238669	0.502522	0
YDR241W	BUD26	-0.0234576	0.858608	0.939504	0.0258185	0.860592	0.944629	0
YDR242W	AMD2	-0.16479	0.23311	0.509266	-0.238965	0.115032	0.330802	0
YDR243C	PRP28	-0.0242314	0.87721	0.946061	-0.182349	0.290633	0.55771	0
YDR244W	PEX5	-0.0135559	0.881122	0.948677	-0.0493198	0.616967	0.817673	0
YDR245W	MNN10	0.0685815	0.165791	0.423218	0.0734293	0.190319	0.443112	0
YDR246W	TRS23	0.0496347	0.653554	0.846732	0.0492765	0.694613	0.861193	0
YDR247W	VHS1	0.084164	0.413125	0.684069	0.0361869	0.758663	0.895505	0
YDR248C	YDR248C	0.0449738	0.398861	0.672765	0.0771348	0.197889	0.45299	0
YDR249C	YDR249C	-0.0213596	0.859779	0.939526	0.0544331	0.69338	0.860699	0
YDR251W	PAM1	-0.11677	0.0891405	0.292617	-0.179754	0.0188275	0.0955215	0
YDR252W	BTT1	0.169055	0.218845	0.496446	0.19168	0.218541	0.479252	0
YDR253C	MET32	0.0678096	0.668017	0.855988	0.141632	0.430066	0.679244	0
YDR254W	CHL4	-0.185516	0.0705463	0.255164	-0.347637	0.00269221	0.020977	0
YDR255C	RMD5	0.0960124	0.583836	0.807843	0.0596921	0.76192	0.896701	0
YDR257C	RKM4	0.0020892	0.981545	0.993597	0.0687473	0.498958	0.734259	0
YDR258C	HSP78	-0.163886	0.0107143	0.0680191	-0.137101	0.0514699	0.193002	0
YDR259C	YAP6	0.742958	3.35216e-09	1.02043e-07	0.87296	6.30084e-10	2.04506e-08	1
YDR260C	SWM1	0.0100257	0.905816	0.958058	-0.0599408	0.528016	0.761467	0
YDR261C	EXG2	0.0744007	0.196274	0.468624	0.0165514	0.793834	0.912203	0
YDR262W	YDR262W	-0.377921	3.81808e-10	1.29051e-08	-0.348992	3.30239e-07	7.25785e-06	1
YDR264C	AKR1	-0.696844	2.28068e-30	2.94148e-28	-0.766734	1.50445e-29	1.99279e-27	1
YDR265W	PEX10	-0.278699	0.000840049	0.00857725	-0.105094	0.270506	0.539361	0
YDL202W	MRPL11	0.135148	0.147995	0.398529	0.184237	0.0598202	0.21589	0
YDL201W	TRM8	-0.0743888	0.357288	0.636521	-0.00312985	0.970264	0.98733	0
YDL200C	MGT1	-0.182176	0.014602	0.0863261	-0.239746	0.00228549	0.0183626	0
YIL128W	MET18	-0.189264	0.0787415	0.271993	-0.188174	0.092087	0.288014	0
YIL127C	RRT14	0.128811	0.451374	0.714137	0.180633	0.311494	0.579147	0
YIL126W	STH1	0.0421911	0.526755	0.769945	-0.00271378	0.968673	0.987298	0
YIL125W	KGD1	0.140784	0.0259806	0.12989	0.155739	0.0181061	0.0924073	0
YIL124W	AYR1	-0.106047	0.00714619	0.0501769	-0.139678	0.000552107	0.00551095	0
YIL123W	SIM1	-0.236678	1.20652e-07	2.92731e-06	-0.260585	7.1384e-09	2.04592e-07	1
YIL122W	POG1	0.0914706	0.547893	0.783549	0.0178621	0.910607	0.966013	0
YIL121W	QDR2	0.345793	0.0215928	0.114201	0.306036	0.0218407	0.106297	0
YIL120W	QDR1	-0.11013	0.385891	0.66081	-0.201442	0.13379	0.362088	0
YIL119C	RPI1	-0.125285	0.0638527	0.23654	-0.184766	0.00792965	0.050341	0
YIL118W	RHO3	0.109036	0.0471364	0.196343	0.0921717	0.121881	0.34358	0
YIL117C	PRM5	0.0329548	0.732661	0.885421	0.115319	0.249905	0.515202	0
YIL116W	HIS5	0.723227	6.88856e-47	1.60766e-44	0.694502	5.01888e-37	1.0249e-34	1
YIL115C	NUP159	0.202544	0.0153457	0.0891103	0.18558	0.0438534	0.174503	0
YIL114C	POR2	0.0444092	0.690559	0.866929	0.0341825	0.781442	0.907505	0
YIL112W	HOS4	-0.0431893	0.636999	0.839229	-0.0413439	0.681518	0.854541	0
YIL111W	COX5B	-0.679069	6.06093e-18	4.18375e-16	-1.01787	1.93902e-31	2.96974e-29	1
YIL110W	HPM1	0.236975	0.0100607	0.0652018	0.280691	0.00607204	0.040215	0
YIL109C	SEC24	-0.0178014	0.686537	0.864967	0.00204343	0.966673	0.987298	0
YIL108W	YIL108W	-0.0666339	0.356779	0.636445	-0.0706688	0.40421	0.662451	0
YIL107C	PFK26	-0.0829676	0.394287	0.668856	-0.155598	0.181386	0.431728	0
YIL106W	MOB1	0.112002	0.154291	0.406113	0.0674803	0.47002	0.7134	0
YIL105C	SLM1	-0.0661189	0.406736	0.678698	-0.0906211	0.340977	0.607392	0
YIL104C	SHQ1	0.0640227	0.652706	0.846732	-0.0763668	0.654275	0.838769	0
YIL103W	DPH1	-0.0306444	0.790182	0.909532	-0.136145	0.32577	0.593518	0
YIL102C-A	YIL102C-A	-0.0450912	0.684332	0.863298	-0.0436499	0.743255	0.887163	0
YIL101C	XBP1	-0.413595	0.000197702	0.00251673	-0.569364	1.92465e-05	0.000307254	1
YIL097W	FYV10	-0.0862964	0.48253	0.739257	0.0605714	0.673317	0.850294	0
YIL096C	BMT5	0.411034	0.0132917	0.0811238	0.411408	0.0298552	0.131465	0
YIL095W	PRK1	0.170139	0.152909	0.403994	0.132252	0.334055	0.602356	0
YIL094C	LYS12	-0.0729116	0.0179016	0.0994736	-0.0796748	0.0212349	0.103897	0
YIL093C	RSM25	-0.0268327	0.810736	0.919347	-0.151801	0.243172	0.507359	0
YIL092W	YIL092W	0.0196757	0.891423	0.952054	-0.0570055	0.733976	0.883085	0
YIL091C	UTP25	0.0929323	0.388857	0.663113	0.107262	0.390699	0.650634	0
YIL090W	ICE2	-0.227008	0.00109817	0.0108292	-0.265229	0.000339633	0.00366869	1
YIL089W	YIL089W	0.708403	9.2473e-05	0.00132131	0.923387	3.87042e-06	6.97388e-05	1
YIL088C	AVT7	-0.0504346	0.341796	0.621889	-0.0527462	0.350612	0.615741	0
YIL087C	AIM19	0.575362	7.71907e-16	4.20346e-14	0.675202	3.7967e-19	2.73641e-17	1
YIL085C	KTR7	-0.0804007	0.222781	0.499968	-0.109433	0.11893	0.337474	0
YIL084C	SDS3	0.134888	0.424247	0.695174	0.158657	0.380985	0.643865	0
YIL083C	CAB2	0.0175004	0.800151	0.913473	0.0203436	0.780787	0.907505	0
YIL079C	AIR1	-0.138034	0.149504	0.401052	-0.0917061	0.364472	0.629636	0
YIL078W	THS1	0.00518976	0.883653	0.949525	0.0222451	0.548545	0.77655	0
YIL077C	YIL077C	-0.143039	0.0917756	0.29726	-0.0727162	0.412724	0.668681	0
YIL076W	SEC28	-0.0223252	0.54898	0.784646	-0.0348899	0.386159	0.647799	0
YIL075C	RPN2	0.0548513	0.208102	0.484748	0.0547651	0.246055	0.510633	0
YIL074C	SER33	-0.199497	5.36559e-06	0.000100754	-0.191674	6.51047e-05	0.000879003	1
YIL071C	PCI8	-0.0799747	0.488968	0.742162	-0.0333215	0.793551	0.912203	0
YIL070C	MAM33	0.0347087	0.62269	0.828645	0.0566507	0.462956	0.710156	0
YIL069C	RPS24B	0.0241909	0.414042	0.684622	0.0224814	0.455319	0.701295	0
YIL068C	SEC6	-0.111492	0.10584	0.326241	-0.195059	0.00992384	0.0586692	0
YIL067C	YIL067C	-0.121471	0.257089	0.538277	-0.0858352	0.465952	0.711723	0
YIL066C	RNR3	0.0754456	0.639586	0.841732	0.152842	0.386364	0.647799	0
YIL065C	FIS1	0.207029	0.00256458	0.0221676	0.230141	0.00173389	0.0145261	1
YIL064W	EFM4	0.114916	0.177751	0.439538	0.186698	0.0403324	0.164815	0
YIL063C	YRB2	0.0656843	0.436196	0.703021	0.109669	0.221818	0.482954	0
YIL062C	ARC15	-0.058162	0.0994002	0.314103	-0.0451838	0.228315	0.490777	0
YIL059C	YIL059C	-1.47984	8.76743e-17	5.24014e-15	-1.84418	2.61431e-20	2.10045e-18	1
YIL056W	VHR1	0.224122	0.00476962	0.036582	0.259227	0.00205291	0.0167673	1
YIL055C	YIL055C	0.255171	0.133974	0.377136	0.285153	0.114849	0.330593	0
YIL053W	GPP1	0.261689	3.55263e-10	1.20913e-08	0.24175	4.33874e-09	1.28874e-07	1
YIL052C	RPL34B	0.056959	0.0284135	0.138643	0.0483129	0.063154	0.224777	0
YIL051C	MMF1	-0.0813483	0.0031293	0.0260828	-0.0904822	0.00114271	0.0102384	1
YIL050W	PCL7	-0.0086019	0.893531	0.952054	-0.0302655	0.643246	0.83225	0
YIL049W	DFG10	-0.305905	0.000538291	0.00594181	-0.263974	0.00317192	0.02377	1
YIL048W	NEO1	-0.108725	0.306453	0.589155	-0.0900336	0.42547	0.675591	0
YIL047C	SYG1	-0.00168643	0.984669	0.994613	-0.000902417	0.992285	0.998335	0
YIL046W	MET30	0.121283	0.206988	0.483184	0.152082	0.142765	0.373765	0
YIL045W	PIG2	0.198816	0.0570002	0.22014	0.176308	0.103989	0.31019	0
YIL044C	AGE2	0.0204625	0.753405	0.895997	0.0114068	0.865276	0.944751	0
YIL043C	CBR1	-0.0315942	0.38765	0.661516	-0.0636371	0.0938425	0.291829	0
YIL042C	PKP1	-0.100016	0.279007	0.559504	-0.073221	0.446189	0.69279	0
YIL041W	GVP36	-0.131965	8.70512e-05	0.00125114	-0.14105	4.31949e-05	0.000631936	1
YIL040W	APQ12	-0.00308812	0.952765	0.98069	-0.00927039	0.863486	0.944751	0
YIL039W	TED1	-0.143889	0.00511175	0.038602	-0.1319	0.0134482	0.0735598	0
YIL038C	NOT3	-0.19259	0.023637	0.122587	-0.202012	0.0236717	0.112745	0
YIL036W	CST6	0.0472217	0.58975	0.809405	0.050936	0.583383	0.800094	0
YIL035C	CKA1	-0.0590054	0.254013	0.534989	-0.0581513	0.289561	0.556306	0
YIL034C	CAP2	-0.0639671	0.0912317	0.296488	-0.0672173	0.104266	0.31019	0
YIL033C	BCY1	0.179641	1.85715e-05	0.000300393	0.155177	0.00072917	0.00697981	1
YIL031W	ULP2	-0.0181751	0.900617	0.954486	0.0272245	0.864475	0.944751	0
YIL030C	SSM4	0.123511	0.246986	0.526584	0.108789	0.365683	0.631061	0
YIL027C	EMC5	0.0684166	0.233254	0.509266	0.0256293	0.690591	0.860699	0
YIL026C	IRR1	-0.0557403	0.623008	0.828645	0.0102922	0.935398	0.974635	0
YIL024C	YIL024C	-0.109833	0.505149	0.754307	-0.19236	0.289042	0.556205	0
YIL023C	YKE4	0.116388	0.184866	0.451953	0.166692	0.0850614	0.273547	0
YIL022W	TIM44	0.0384448	0.569927	0.798037	0.0563653	0.43876	0.687388	0
YIL021W	RPB3	0.0248054	0.653957	0.846732	-0.00592599	0.920736	0.968847	0
YIL020C	HIS6	0.19336	0.0332885	0.15523	0.172113	0.077985	0.258072	0
YIL019W	FAF1	0.071994	0.653485	0.846732	0.118361	0.472934	0.716492	0
YIL018W	RPL2B	-0.0952322	1.60798e-05	0.000264453	-0.0666127	0.00203622	0.0166675	1
YIL017C	VID28	-0.0671458	0.497507	0.747789	-0.0567992	0.583867	0.800204	0
YIL016W	SNL1	0.0275125	0.666392	0.855029	-0.0193587	0.771711	0.902447	0
YIL015W	BAR1	0.011435	0.89298	0.952054	0.0310256	0.699819	0.864424	0
YIL014C-A	YIL014C-A	-2.77617	3.79853e-46	8.46209e-44	-2.16529	6.68332e-43	1.72394e-40	1
YIL014W	MNT3	-0.195981	0.0465084	0.19487	-0.194374	0.0645291	0.228237	0
YIL013C	PDR11	-0.243331	0.135299	0.378085	-0.225288	0.201008	0.457142	0
YIL010W	DOT5	-0.0309403	0.567925	0.796395	0.0568373	0.329066	0.597258	0
YIL009C-A	EST3	0.0755435	0.387249	0.661516	0.189088	0.0438571	0.174503	0
YIL009W	FAA3	-0.340716	0.00013197	0.00176236	-0.393171	4.57766e-05	0.000663761	1
YIL008W	URM1	-0.0458777	0.735867	0.886768	0.248787	0.115581	0.331631	0
YIL007C	NAS2	0.0448568	0.593202	0.811769	0.0169592	0.859294	0.944013	0
YIL006W	YIA6	0.209293	0.130001	0.371639	0.171012	0.277287	0.546806	0
YIL005W	EPS1	0.0384732	0.612927	0.823453	-0.0246345	0.776718	0.905747	0
YIL004C	BET1	0.0106905	0.868796	0.943699	0.0265665	0.721211	0.876542	0
YIL003W	CFD1	0.0746288	0.476327	0.73373	-0.0622063	0.602917	0.808674	0
YIL002W-A	YIL002W-A	-0.0173967	0.862009	0.940178	0.0259314	0.822913	0.92651	0
YIL002C	INP51	-0.0224563	0.840061	0.932957	0.00981266	0.938732	0.976177	0
YIL001W	YIL001W	0.0731022	0.545133	0.781601	0.214368	0.123701	0.346086	0
YIR001C	SGN1	0.0828043	0.224828	0.500941	0.106951	0.170813	0.418864	0
YIR002C	MPH1	0.00638759	0.921416	0.965959	0.0648164	0.379948	0.642751	0
YIR003W	AIM21	0.0530082	0.544199	0.780979	0.0788198	0.441732	0.690287	0
YIR004W	DJP1	-0.120566	0.0844274	0.283866	-0.0977448	0.229279	0.49125	0
YIR005W	IST3	0.0544222	0.72962	0.885098	-0.0589243	0.751143	0.890828	0
YIR006C	PAN1	0.178588	0.0305488	0.14621	0.13775	0.15191	0.389153	0
YIR007W	EGH1	0.0804948	0.483648	0.739874	0.0810717	0.544695	0.774456	0
YIR008C	PRI1	-0.0840496	0.409231	0.679369	-0.0223582	0.851158	0.941113	0
YIR009W	MSL1	-0.0282932	0.836829	0.93089	0.034338	0.831292	0.930174	0
YIR010W	DSN1	-0.0500193	0.7007	0.871554	0.0025473	0.986693	0.996091	0
YIR011C	STS1	0.000873319	0.992381	0.997101	-0.0108037	0.919674	0.968483	0
YIR012W	SQT1	0.0247297	0.670177	0.857243	0.0974736	0.148622	0.383973	0
YIR014W	YIR014W	0.105356	0.304034	0.586874	0.0873923	0.455064	0.701122	0
YIR016W	YIR016W	-0.0258426	0.797772	0.912417	0.0885009	0.446376	0.69279	0
YIR017C	MET28	0.0619585	0.247698	0.527354	0.0813018	0.179791	0.430252	0
YIR018W	YAP5	-0.158977	0.133348	0.375848	-0.0711427	0.563654	0.786111	0
YIR021W	MRS1	-0.0870617	0.397553	0.672307	0.0152811	0.895195	0.958699	0
YIR021W-A	YIR021W-A	-0.0593292	0.660767	0.851392	-0.0853407	0.569927	0.789936	0
YIR022W	SEC11	0.11852	0.00914899	0.0605883	0.154577	0.00190304	0.0157281	0
YIR023W	DAL81	0.128493	0.233002	0.509266	0.1782	0.134595	0.362644	0
YIR024C	INA22	-0.156038	0.174897	0.435958	-0.239137	0.0590321	0.213675	0
YIR025W	MND2	0.00420884	0.979091	0.992462	0.0913834	0.600054	0.807553	0
YIR026C	YVH1	0.193355	0.0239643	0.122983	0.341703	0.000237898	0.00270519	0
YIR029W	DAL2	-0.0768113	0.47308	0.732796	-0.0100921	0.92962	0.972895	0
YIR031C	DAL7	-0.560485	3.78251e-11	1.41512e-09	-0.535062	2.05986e-09	6.27042e-08	1
YIR032C	DAL3	0.196672	0.00149479	0.0138895	0.285437	9.83563e-06	0.00016796	1
YIR033W	MGA2	0.163743	0.0897922	0.293909	0.209801	0.0416425	0.168809	0
YIR034C	LYS1	0.033178	0.510567	0.75778	0.0660966	0.209814	0.468991	0
YIR035C	YIR035C	0.134864	0.00775909	0.0536351	0.202151	9.50334e-05	0.00123217	0
YIR036C	IRC24	-0.000433468	0.99515	0.997646	0.0575166	0.449764	0.69558	0
YIR037W	HYR1	-0.0366188	0.276571	0.558391	-0.0446421	0.196754	0.451236	0
YIR038C	GTT1	-0.137688	0.0057553	0.0423524	-0.148595	0.00292328	0.0223716	1
YIL165C	YIL165C	-0.0746467	0.439088	0.704025	-0.0507487	0.631469	0.826332	0
YIL162W	SUC2	0.0153617	0.871771	0.944556	0.0415756	0.691623	0.860699	0
YIL158W	AIM20	0.246524	0.00133709	0.0126507	0.387795	3.59347e-06	6.52282e-05	1
YIL157C	COA1	-0.104034	0.119733	0.353287	-0.0697338	0.348265	0.614858	0
YIL156W-B	YIL156W-B	-0.0528655	0.408115	0.679369	0.0813459	0.260854	0.526904	0
YIL156W	UBP7	0.162227	0.185053	0.451953	0.229339	0.0982615	0.299863	0
YIL155C	GUT2	0.00561071	0.958426	0.983304	0.111999	0.364285	0.629636	0
YIL154C	IMP2'	-0.10882	0.11405	0.341507	-0.10801	0.173024	0.421919	0
YIL153W	RRD1	-0.206172	0.00750488	0.0520984	-0.239014	0.00697329	0.0452664	0
YIL152W	YIL152W	0.0299763	0.789929	0.909532	0.00492544	0.968001	0.987298	0
YIL151C	ESL1	-0.0867897	0.41013	0.680449	-0.0487844	0.676237	0.851551	0
YIL149C	MLP2	0.010253	0.893583	0.952054	0.0119663	0.884544	0.953199	0
YIL148W	RPL40A	0.0175277	0.445972	0.7108	-0.005017	0.819343	0.924237	0
YIL147C	SLN1	-0.0405358	0.724819	0.882349	-0.0360094	0.771628	0.902447	0
YIL146C	ATG32	0.156486	0.137211	0.380788	0.145821	0.196083	0.451236	0
YIL145C	PAN6	-0.0552225	0.359335	0.638524	-0.0875906	0.172733	0.421596	0
YIL144W	NDC80	-0.146357	0.171682	0.432382	-0.256452	0.0240231	0.113398	0
YIL143C	SSL2	0.0976613	0.304371	0.587292	0.1778	0.0833397	0.269959	0
YIL142W	CCT2	0.0947505	0.0344106	0.158801	0.0639995	0.181719	0.431728	0
YIL140W	AXL2	-0.0597596	0.536743	0.776669	-0.125092	0.226223	0.488638	0
YIL139C	REV7	0.0892677	0.32098	0.603355	0.141778	0.144544	0.377183	0
YIL138C	TPM2	0.0626293	0.209535	0.486086	0.0631526	0.244015	0.508467	0
YIL137C	TMA108	0.17756	0.0835179	0.282096	0.184614	0.099311	0.301329	0
YIL136W	OM45	-0.249576	0.00334794	0.0275769	-0.320083	0.000278008	0.00309663	1
YIL135C	VHS2	-0.0692776	0.429496	0.699323	-0.131429	0.162068	0.405186	0
YIL134W	FLX1	-0.459455	0.000110707	0.0015327	-0.460967	0.000159059	0.00191066	1
YIL133C	RPL16A	0.0449719	0.0727326	0.260002	0.0899476	0.000280221	0.0031142	0
YIL131C	FKH1	0.0100304	0.931046	0.970016	0.0539453	0.653894	0.838769	0
YIL130W	ASG1	-0.589703	0.000940492	0.00944539	-0.627635	0.000848877	0.00789191	1
YIL129C	TAO3	-0.0541841	0.650753	0.846428	-0.0906444	0.468904	0.71281	0
YEL029C	BUD16	0.194211	0.0250973	0.126415	0.183988	0.0686169	0.237953	0
YEL028W	YEL028W	0.237254	0.187438	0.456578	0.4936	0.0211875	0.10384	0
YEL027W	VMA3	0.0520435	0.00171883	0.0155999	0.0597609	0.0015069	0.0128889	1
YEL026W	SNU13	0.0124285	0.702205	0.87215	-0.00321842	0.930717	0.973212	0
YEL025C	YEL025C	-0.0720512	0.586625	0.809405	-0.0299553	0.847244	0.939657	0
YEL024W	RIP1	-0.0215591	0.7091	0.875123	0.0112459	0.847059	0.939657	0
YEL022W	GEA2	-0.0204669	0.848479	0.935618	0.0290195	0.816949	0.923188	0
YEL021W	URA3	0.0559542	0.409259	0.679369	0.0632703	0.410705	0.667254	0
YEL020W-A	TIM9	0.126	0.038705	0.170741	0.131015	0.057436	0.208668	0
YEL018W	EAF5	0.119407	0.318568	0.601425	0.0191738	0.886986	0.953921	0
YEL017C-A	PMP2	0.0573486	0.0118005	0.0738623	0.0528524	0.0227709	0.109627	0
YEL017W	GTT3	-0.207153	0.00324607	0.026828	-0.21083	0.00799504	0.0506249	0
YEL016C	NPP2	-0.0961317	0.371781	0.650592	-0.123853	0.313185	0.580969	0
YEL015W	EDC3	0.0118533	0.849009	0.935618	0.0651032	0.358002	0.623291	0
YEL013W	VAC8	-0.037493	0.608118	0.821607	0.0250824	0.751233	0.890828	0
YEL012W	UBC8	-0.0506298	0.437506	0.703021	-0.128563	0.0663502	0.232605	0
YEL011W	GLC3	-0.178761	0.0245243	0.124553	-0.204762	0.0156414	0.0825173	0
YEL009C	GCN4	-0.0774988	3.78343e-05	0.000581273	-0.0674913	0.000457814	0.00472151	1
YEL007W	MIT1	0.226553	0.00132315	0.0125674	0.276268	0.000229297	0.00263715	1
YEL006W	YEA6	-0.097593	0.134042	0.377136	-0.0876164	0.207332	0.466117	0
YEL005C	VAB2	0.0840986	0.437046	0.703021	0.0877666	0.447313	0.693358	0
YEL072W	RMD6	0.0979379	0.20895	0.485262	0.124754	0.134269	0.362165	0
YEL004W	YEA4	0.127729	0.229508	0.505309	0.181113	0.112405	0.326748	0
YEL003W	GIM4	0.00501024	0.963982	0.984881	-0.068169	0.568888	0.789835	0
YEL002C	WBP1	0.000330252	0.991543	0.996832	0.018455	0.580641	0.799135	0
YEL001C	IRC22	0.0542815	0.184898	0.451953	0.0530052	0.22652	0.488873	0
YER001W	MNN1	-0.0141243	0.836613	0.93089	-0.00600824	0.935045	0.974635	0
YER002W	NOP16	-0.0392467	0.765429	0.899636	-0.0277047	0.844731	0.938356	0
YER003C	PMI40	0.0955953	0.0338418	0.157134	0.0862115	0.0640686	0.227536	0
YER004W	FMP52	-0.0308951	0.464809	0.725929	-0.00324028	0.942854	0.97793	0
YER005W	YND1	0.20338	0.0920416	0.297397	0.194613	0.132726	0.360581	0
YER006W	NUG1	-0.0172722	0.773457	0.903412	0.0300365	0.636785	0.827648	0
YER007C-A	TMA20	-0.0348626	0.478526	0.735765	-0.0360889	0.490213	0.729367	0
YEL071W	DLD3	-0.0905181	0.00885746	0.0596235	-0.0905682	0.00583573	0.0391257	0
YER008C	SEC3	0.0571357	0.453552	0.716589	0.0489845	0.54932	0.776578	0
YER009W	NTF2	-0.0120871	0.618607	0.827034	-0.0289099	0.26359	0.530399	0
YER010C	YER010C	-0.0434291	0.483634	0.739874	-0.0305109	0.645684	0.832543	0
YER012W	PRE1	-0.0289522	0.439571	0.704031	-0.0599224	0.130443	0.356679	0
YER013W	PRP22	-0.111533	0.283598	0.565466	-0.128438	0.249409	0.514479	0
YER014W	HEM14	-0.00502851	0.959155	0.983505	0.0366034	0.731029	0.881587	0
YER015W	FAA2	0.119896	0.402583	0.674861	0.0601403	0.699267	0.864424	0
YER016W	BIM1	-0.0389124	0.585911	0.809298	-0.0189796	0.80376	0.91738	0
YER017C	AFG3	0.108579	0.155263	0.407794	0.132244	0.105518	0.311739	0
YER018C	SPC25	-0.0225226	0.827289	0.928399	-0.0387744	0.7213	0.876542	0
YER019W	ISC1	-0.0926459	0.271286	0.552362	-0.0796929	0.369188	0.634219	0
YER019C-A	SBH2	-0.0688959	0.017884	0.0994736	-0.0456594	0.127357	0.351726	0
YER020W	GPA2	0.256778	0.000791268	0.00816422	0.321633	5.74726e-05	0.000800207	1
YER021W	RPN3	0.000297272	0.99405	0.99751	0.000237574	0.995393	0.998335	0
YER022W	SRB4	-0.0568384	0.613417	0.823532	-0.0887159	0.444229	0.691603	0
YER023W	PRO3	-0.0448309	0.0656932	0.241351	-0.0403945	0.0988579	0.300754	0
YER024W	YAT2	0.0422605	0.707568	0.875042	0.0853991	0.459404	0.705811	0
YER025W	GCD11	0.026918	0.485739	0.741006	0.0243524	0.537867	0.770335	0
YER026C	CHO1	-0.116886	6.16565e-05	0.000907443	-0.140459	2.04974e-06	3.86377e-05	1
YER027C	GAL83	0.114995	0.0742969	0.263099	0.0883733	0.176008	0.425637	0
YER028C	MIG3	0.574306	0.000697965	0.00738818	0.6041	0.000662026	0.00638698	1
YER029C	SMB1	0.0372507	0.653775	0.846732	0.0147969	0.864405	0.944751	0
YER030W	CHZ1	0.193619	0.126661	0.364832	0.195962	0.139744	0.369562	0
YER031C	YPT31	-0.0928822	0.0343529	0.158684	-0.123088	0.00725225	0.0468291	0
YER032W	FIR1	0.00742128	0.959224	0.983505	0.105277	0.492721	0.730173	0
YER033C	ZRG8	-0.0379022	0.759951	0.89834	-0.0655411	0.618226	0.817968	0
YER034W	YER034W	-0.0868131	0.398132	0.672307	-0.0579739	0.588812	0.803164	0
YER035W	EDC2	-0.163301	0.000900559	0.00913797	-0.166757	0.00107964	0.00974464	1
YER036C	ARB1	-0.101524	0.0180816	0.100246	-0.101113	0.0237907	0.112977	0
YER037W	PHM8	-0.659919	7.92718e-11	2.8153e-09	-0.717471	1.50267e-11	5.75357e-10	1
YER039C	HVG1	0.202785	0.0583662	0.223479	0.183171	0.0988057	0.300754	0
YER040W	GLN3	-0.113137	0.27901	0.559504	-0.118125	0.276732	0.546219	0
YER041W	YEN1	-0.162407	0.257332	0.538277	-0.162235	0.261835	0.528305	0
YER042W	MXR1	0.0587385	0.381372	0.656562	0.0745074	0.271143	0.540411	0
YER043C	SAH1	-0.055312	0.00163269	0.0149847	-0.0515522	0.00330295	0.0246014	1
YER044C	ERG28	0.132937	0.010804	0.0684996	0.160416	0.00227886	0.0183626	0
YER045C	ACA1	-0.0449846	0.775883	0.90452	-0.046501	0.776481	0.905747	0
YER046W	SPO73	-0.341758	0.000226112	0.00281713	-0.398349	3.77134e-05	0.000561803	1
YER047C	SAP1	-0.0323913	0.845205	0.934902	-0.133032	0.440636	0.689294	0
YER048C	CAJ1	-0.0357518	0.620016	0.827081	0.00845415	0.909759	0.966013	0
YER048W-A	ISD11	0.253131	5.43683e-10	1.82506e-08	0.257104	9.09753e-10	2.87658e-08	1
YER049W	TPA1	-0.15162	0.0241146	0.123569	-0.152085	0.0278789	0.125583	0
YER050C	RSM18	-0.137977	0.201454	0.476238	-0.169471	0.128875	0.354244	0
YER051W	JHD1	0.276816	0.0244123	0.124242	0.239227	0.0592601	0.214184	0
YER052C	HOM3	-0.0387241	0.460427	0.721543	-0.0561527	0.298383	0.565253	0
YEL068C	YEL068C	0.0427197	0.610816	0.822419	0.180013	0.0488169	0.186333	0
YER053C	PIC2	-0.392815	4.00305e-09	1.20362e-07	-0.376569	2.19686e-08	5.88351e-07	1
YER053C-A	YER053C-A	-0.207037	0.0222125	0.116806	-0.153152	0.0611091	0.21881	0
YER054C	GIP2	-0.0260843	0.857259	0.938532	0.0475742	0.752256	0.89161	0
YER055C	HIS1	0.0328626	0.301819	0.584671	0.043019	0.186207	0.436428	0
YER056C	FCY2	-0.0574831	0.194717	0.46734	-0.0499716	0.267203	0.53517	0
YER056C-A	RPL34A	0.0345109	0.272096	0.552877	0.0515849	0.0990599	0.301174	0
YEL066W	HPA3	0.197382	0.0140972	0.0840517	0.364755	3.59626e-05	0.000540652	0
YER057C	HMF1	0.12393	1.44234e-05	0.000242917	0.126262	1.65502e-05	0.000266817	1
YER058W	PET117	0.0949012	0.5191	0.764685	0.0663294	0.661389	0.844572	0
YER059W	PCL6	-0.00530579	0.951632	0.980639	-0.00332972	0.970463	0.98733	0
YER060W	FCY21	0.029874	0.750152	0.894714	0.069402	0.476356	0.719264	0
YER061C	CEM1	0.0517813	0.694363	0.869155	0.128682	0.347905	0.614665	0
YER062C	GPP2	0.0705981	0.159043	0.413513	0.0558772	0.268062	0.536451	0
YER063W	THO1	-0.0417395	0.242945	0.521997	-0.0289448	0.448073	0.693358	0
YER064C	VHR2	0.0146907	0.919287	0.965238	-0.0104728	0.946383	0.979768	0
YER065C	ICL1	0.0658585	0.556699	0.791983	0.157912	0.198764	0.453361	0
YEL065W	SIT1	-0.0744322	0.496218	0.746688	-0.0378532	0.736719	0.884099	0
YER066W	RRT13	0.0539438	0.726873	0.883971	-0.00914796	0.95839	0.984631	0
YER067W	RGI1	-0.0928262	0.407864	0.679369	-0.179277	0.139025	0.368103	0
YER068W	MOT2	0.0303832	0.692718	0.868956	-0.0726307	0.404351	0.662451	0
YER069W	ARG5,6	0.023969	0.68649	0.864967	0.0535672	0.415149	0.669952	0
YEL064C	AVT2	0.245896	0.067944	0.247763	0.367909	0.0134949	0.07366	0
YER070W	RNR1	0.0679543	0.373242	0.651695	0.0903316	0.312168	0.579961	0
YER071C	TDA2	-0.0786652	0.298927	0.580933	-0.160785	0.0639561	0.227466	0
YER072W	VTC1	-0.0380491	0.365352	0.644667	-0.0254043	0.569716	0.789936	0
YER073W	ALD5	0.0299455	0.578229	0.803596	0.0266046	0.667023	0.847187	0
YER074W	RPS24A	-0.00924757	0.687144	0.865508	-0.00155308	0.94714	0.980059	0
YER074W-A	YOS1	-0.108595	0.198761	0.472419	-0.289081	0.00346402	0.0255894	0
YER075C	PTP3	0.16957	0.151507	0.402886	0.0662825	0.63027	0.825702	0
YER076C	YER076C	-0.25744	0.133041	0.375813	-0.376139	0.0694264	0.239282	0
YER077C	MRX1	0.109745	0.295127	0.576261	0.120682	0.340342	0.606771	0
YER078C	ICP55	0.0152522	0.827433	0.928399	-0.0828121	0.324735	0.59319	0
YEL063C	CAN1	0.0369896	0.564618	0.794848	0.127375	0.0693864	0.239282	0
YEL062W	NPR2	0.0690427	0.517578	0.764039	0.156735	0.181344	0.431728	0
YER078W-A	YER078W-A	-0.293204	0.0825076	0.280035	-0.218688	0.260925	0.526904	0
YER079W	YER079W	-0.108612	0.174387	0.43523	-0.0946308	0.300339	0.567012	0
YER080W	AIM9	-0.0122433	0.873992	0.945451	-0.129877	0.142215	0.372924	0
YER081W	SER3	0.52904	1.46658e-17	9.84615e-16	0.431817	2.72036e-09	8.12955e-08	1
YER082C	UTP7	0.0411596	0.733666	0.885421	0.173276	0.215272	0.474639	0
YER083C	GET2	0.0175103	0.764817	0.899636	-0.0103496	0.872467	0.947057	0
YER084W	YER084W	-0.122046	0.447229	0.711888	-0.247278	0.165621	0.411408	0
YER086W	ILV1	-0.0529227	0.232978	0.509266	-0.0462345	0.337751	0.605157	0
YER087W	AIM10	-0.163192	0.124623	0.362048	-0.199348	0.0825335	0.268056	0
YER087C-B	SBH1	-0.0407728	0.251726	0.532075	-0.0824801	0.0229809	0.110529	0
YER088C	DOT6	0.00513266	0.916974	0.964397	0.0101232	0.848782	0.940381	0
YER088C-A	YER088C-A	-0.0704744	0.620812	0.827468	-0.108077	0.498167	0.733868	0
YER089C	PTC2	0.177608	0.000438006	0.00503912	0.183562	0.00119653	0.0106622	1
YER090W	TRP2	0.021727	0.675798	0.860496	0.0531049	0.355392	0.620732	0
YER091C	MET6	0.0445005	0.080584	0.276183	0.0381755	0.14313	0.374123	0
YER092W	IES5	0.0488516	0.502987	0.752484	0.0449676	0.582966	0.800094	0
YER093C-A	AIM11	0.000277514	0.997617	0.998636	0.0449953	0.664982	0.846178	0
YER094C	PUP3	0.0430661	0.180426	0.444858	0.00615965	0.863901	0.944751	0
YER095W	RAD51	0.0316291	0.673644	0.859971	0.0229583	0.772348	0.902761	0
YER098W	UBP9	-0.0409359	0.742547	0.890003	-0.0312535	0.811973	0.92143	0
YER099C	PRS2	0.181254	0.00790219	0.0542418	0.205318	0.00423745	0.0304066	0
YER100W	UBC6	0.000258479	0.995864	0.998028	0.000234242	0.996433	0.998479	0
YER101C	AST2	-0.0256267	0.836409	0.93089	-0.0555529	0.672612	0.850294	0
YER102W	RPS8B	-0.00417534	0.871035	0.944556	0.00103129	0.966804	0.987298	0
YER103W	SSA4	-0.149384	0.14347	0.390636	-0.140745	0.17516	0.42498	0
YER104W	RTT105	0.499832	5.76836e-05	0.000851529	0.498833	0.000133939	0.00166608	1
YER105C	NUP157	-0.0193162	0.848063	0.935618	-0.0950129	0.377491	0.64005	0
YER107C	GLE2	0.167325	0.0100072	0.0649605	0.192002	0.00604428	0.0400853	0
YER110C	KAP123	0.0863162	0.226072	0.502451	0.0588134	0.444119	0.691603	0
YER111C	SWI4	-0.124407	0.261088	0.541741	-0.154847	0.193961	0.448186	0
YER112W	LSM4	-0.0938405	0.221414	0.499855	-0.110179	0.176898	0.426663	0
YER113C	TMN3	-0.0251384	0.772355	0.902554	-0.0462677	0.618358	0.817968	0
YER114C	BOI2	-0.116632	0.316002	0.597941	-0.151869	0.223508	0.485022	0
YER115C	SPR6	-0.205187	0.0270539	0.13366	-0.124527	0.205942	0.46427	0
YER116C	SLX8	0.00139096	0.989873	0.996679	0.0730149	0.528946	0.762261	0
YER117W	RPL23B	0.0250077	0.359979	0.639129	0.0519173	0.0431693	0.173294	0
YER118C	SHO1	-0.0303938	0.665608	0.854859	-0.04304	0.560451	0.783449	0
YER119C	AVT6	-0.192535	0.000192619	0.00245841	-0.19241	0.000479638	0.00488712	1
YER120W	SCS2	-0.21092	7.11625e-11	2.54575e-09	-0.260339	2.05702e-14	1.02872e-12	1
YER122C	GLO3	-0.005336	0.899875	0.954486	0.0244155	0.591703	0.804371	0
YEL061C	CIN8	0.144949	0.283538	0.565466	0.323836	0.0304106	0.133055	0
YEL060C	PRB1	-0.111731	0.0137632	0.0826636	-0.0934203	0.0510811	0.19228	0
YER123W	YCK3	-0.0756838	0.369888	0.649989	-0.121496	0.192153	0.445267	0
YER124C	DSE1	0.0523252	0.454283	0.716819	0.0499673	0.510773	0.744143	0
YER125W	RSP5	0.159978	0.0133612	0.0812449	0.178376	0.0126012	0.0703763	0
YER126C	NSA2	0.0226347	0.721048	0.881042	0.0930507	0.171326	0.418995	0
YER127W	LCP5	-0.232124	0.0139215	0.0833081	-0.162727	0.117578	0.334994	0
YER129W	SAK1	0.159985	0.151668	0.402886	0.146458	0.239364	0.502838	0
YER130C	COM2	-0.0330062	0.562524	0.794214	-0.042863	0.494692	0.731436	0
YER131W	RPS26B	0.00680145	0.818683	0.923991	0.00614542	0.836468	0.933834	0
YEL059C-A	SOM1	0.0332069	0.698138	0.870301	0.144659	0.126406	0.350008	0
YER132C	PMD1	0.0667733	0.601491	0.816105	0.0265682	0.857845	0.943575	0
YER133W	GLC7	0.00282923	0.92378	0.966783	0.00587236	0.862491	0.944751	0
YER134C	YER134C	0.0207405	0.773349	0.903412	-0.0520692	0.530203	0.763551	0
YEL058W	PCM1	-0.0957067	0.0521038	0.207273	-0.129483	0.0170656	0.0883196	0
YER136W	GDI1	0.0193245	0.604938	0.819232	-0.0312521	0.467716	0.712139	0
YEL057C	SDD1	1.04657	5.68515e-09	1.66844e-07	1.36365	2.05495e-11	7.68802e-10	1
YER141W	COX15	-0.00310014	0.956968	0.982631	-0.0121617	0.84976	0.94051	0
YER142C	MAG1	0.30474	0.00101881	0.0100873	0.370397	0.000374933	0.00399466	1
YER143W	DDI1	0.118346	0.194316	0.466834	0.0855136	0.403672	0.662451	0
YER144C	UBP5	0.12161	0.271729	0.552362	0.203407	0.102023	0.306143	0
YER145C	FTR1	-0.181948	5.25156e-05	0.000782307	-0.253211	7.54023e-09	2.14853e-07	1
YER146W	LSM5	-0.00227862	0.965983	0.985319	0.00458116	0.94052	0.977052	0
YER147C	SCC4	0.0528381	0.675992	0.860496	0.0514166	0.728902	0.880898	0
YER148W	SPT15	-0.0165262	0.676238	0.860496	-0.0307646	0.506561	0.740428	0
YER149C	PEA2	0.0939375	0.266842	0.547422	0.116841	0.236207	0.49885	0
YER150W	SPI1	-0.0459582	0.59171	0.810954	-0.0758981	0.363154	0.628689	0
YER151C	UBP3	-0.0614234	0.480248	0.737376	-0.0168152	0.868618	0.945482	0
YER152C	YER152C	-0.0413524	0.560394	0.792867	-0.0355832	0.671025	0.849791	0
YER154W	OXA1	-0.0783646	0.192204	0.462896	-0.0590529	0.39832	0.657738	0
YER155C	BEM2	-0.206165	0.0100843	0.0652018	-0.298052	0.00142477	0.0123371	0
YEL056W	HAT2	-0.0735642	0.33501	0.61563	-0.0613212	0.466179	0.711723	0
YEL055C	POL5	-0.134032	0.0929559	0.298983	-0.176629	0.0424343	0.170969	0
YEL054C	RPL12A	0.0303037	0.257846	0.538673	-0.0105218	0.699864	0.864424	0
YER156C	YER156C	0.212625	0.0013659	0.0128264	0.220754	0.00287071	0.0220522	1
YER157W	COG3	-0.123066	0.168108	0.42667	-0.0369518	0.716526	0.874564	0
YER158C	YER158C	0.142303	0.0516227	0.206173	0.2106	0.0101251	0.0595002	0
YER159C	BUR6	-0.00153957	0.977337	0.991499	0.0140065	0.808164	0.919927	0
YER161C	SPT2	0.113141	0.0853765	0.285423	0.113344	0.107308	0.31484	0
YER162C	RAD4	-0.0858459	0.472139	0.732324	0.0276991	0.829377	0.929838	0
YER163C	GCG1	0.128217	0.0266961	0.132427	0.25142	5.6428e-05	0.000787902	0
YER164W	CHD1	-0.00103275	0.991437	0.996832	-0.0137332	0.894986	0.958699	0
YER165W	PAB1	0.0259004	0.379427	0.655702	0.0387468	0.20977	0.468991	0
YER166W	DNF1	0.179604	0.0173298	0.0970666	0.233476	0.00394226	0.0284551	0
YER167W	BCK2	-0.177676	0.0649953	0.239419	-0.207373	0.0492921	0.18731	0
YER168C	CCA1	0.180722	0.0490247	0.200766	0.283908	0.00475908	0.0335601	0
YER169W	RPH1	-0.0837377	0.459893	0.72126	-0.000684872	0.995602	0.998335	0
YER170W	ADK2	-0.0383148	0.709056	0.875123	-0.0525914	0.63901	0.828767	0
YER171W	RAD3	-0.013828	0.893398	0.952054	0.00187143	0.986774	0.996091	0
YER172C	BRR2	0.00402784	0.975023	0.99038	-0.0903227	0.517082	0.749976	0
YER173W	RAD24	-0.402184	0.00479404	0.0367119	-0.605947	0.000117331	0.00148588	1
YER174C	GRX4	-0.299264	0.0045457	0.0353066	-0.248825	0.0289886	0.129155	0
YER175C	TMT1	0.0973287	0.176165	0.437916	0.0711693	0.338844	0.605644	0
YER176W	ECM32	-0.0301007	0.692512	0.86892	-0.0563982	0.486546	0.726557	0
YER177W	BMH1	-0.0331845	0.0464863	0.19487	-0.0221629	0.18629	0.436428	0
YER178W	PDA1	-0.198586	3.40355e-17	2.11149e-15	-0.20574	1.69558e-17	1.10801e-15	1
YER180C	ISC10	-0.104197	0.271074	0.552175	-0.121021	0.216949	0.47723	0
YER182W	FMP10	-0.000582514	0.995128	0.997646	0.00890543	0.927761	0.972407	0
YER183C	FAU1	-0.155634	0.141435	0.386599	-0.188065	0.0865786	0.276972	0
YEL053C	MAK10	-0.0444546	0.634743	0.837843	0.0400815	0.703002	0.86677	0
YEL052W	AFG1	-0.0154134	0.860938	0.940018	0.0938543	0.343254	0.609966	0
YEL051W	VMA8	-0.120585	0.000382126	0.00443791	-0.115349	0.00244138	0.0193503	1
YEL050C	RML2	0.0154107	0.834782	0.93089	0.10332	0.205776	0.464231	0
YEL047C	FRD1	-0.043548	0.427028	0.697678	-0.0216053	0.726353	0.879411	0
YEL046C	GLY1	0.0306201	0.490483	0.742627	0.0078381	0.877924	0.949196	0
YEL044W	IES6	0.063326	0.252604	0.533366	0.116662	0.0627215	0.223725	0
YEL043W	YEL043W	0.0395164	0.681708	0.86154	0.0596672	0.587067	0.802794	0
YEL042W	GDA1	-0.0404217	0.537034	0.776857	-0.0357806	0.615064	0.816619	0
YEL041W	YEF1	-0.251994	0.0159903	0.0915517	-0.232676	0.0424237	0.170969	0
YEL040W	UTR2	-0.141535	0.0256393	0.128617	-0.13865	0.0389395	0.16003	0
YEL038W	UTR4	-0.246108	0.0123964	0.076905	-0.312909	0.00387901	0.0280812	0
YEL037C	RAD23	0.358925	7.6613e-09	2.19579e-07	0.494795	5.42834e-13	2.37538e-11	1
YEL036C	ANP1	0.0441033	0.437879	0.70316	0.0585737	0.365651	0.631061	0
YEL034W	HYP2	-0.0138846	0.674781	0.859971	0.0207894	0.387374	0.64818	0
YEL032W	MCM3	-0.143688	0.161883	0.418609	-0.210147	0.0776624	0.258072	0
YEL031W	SPF1	0.00180582	0.969799	0.987374	0.00833293	0.877819	0.949196	0
YEL030W	ECM10	-0.380184	0.0156256	0.0904145	-0.452599	0.0126364	0.0703763	0
YFL018C	LPD1	-0.0939755	0.0171879	0.0964164	-0.0922068	0.0221379	0.107423	0
YFL017W-A	SMX2	-0.165146	0.139277	0.383696	-0.145772	0.216649	0.476998	0
YFL017C	GNA1	-0.00897707	0.888989	0.952054	0.0535682	0.426675	0.676743	0
YFL016C	MDJ1	-0.0762042	0.35502	0.636445	-0.140182	0.10856	0.317569	0
YFL014W	HSP12	0.274682	0.0134437	0.0814097	0.311633	0.000161498	0.00193521	0
YFL013C	IES1	-0.17004	0.125436	0.363299	-0.165703	0.158344	0.400348	0
YFL010C	WWM1	-0.516161	2.18787e-32	3.15374e-30	-0.61095	5.1254e-39	1.09216e-36	1
YFL009W	CDC4	-0.239821	0.0108776	0.0687888	-0.285242	0.00518744	0.0359754	0
YFL008W	SMC1	-0.178018	0.0445656	0.189927	-0.166199	0.0826659	0.268093	0
YFL007W	BLM10	0.125143	0.234905	0.511022	0.224707	0.045176	0.17741	0
YFL005W	SEC4	-0.050038	0.16296	0.420352	-0.04892	0.192423	0.445683	0
YFL004W	VTC2	0.00905791	0.858895	0.939526	0.0355553	0.504207	0.738434	0
YFL002C	SPB4	-0.0404176	0.673881	0.859971	0.0132018	0.896246	0.959062	0
YFL001W	DEG1	-0.261241	0.00585173	0.042869	-0.259493	0.00940228	0.055991	0
YFR001W	LOC1	0.478951	0.000503338	0.00564499	0.433019	0.00254286	0.0199401	1
YFR002W	NIC96	0.00158252	0.982261	0.993597	-0.00667136	0.929091	0.972549	0
YFR003C	YPI1	-0.072616	0.39186	0.666843	-0.0734756	0.408746	0.666201	0
YFR004W	RPN11	0.0233598	0.538199	0.777165	0.0351882	0.377678	0.64005	0
YFR005C	SAD1	-0.0165005	0.87086	0.944556	-0.0252951	0.812839	0.921945	0
YFR006W	YFR006W	0.440701	4.03899e-08	1.06425e-06	0.439767	1.88212e-07	4.46047e-06	1
YFR007W	YFH7	0.165987	0.223093	0.499968	0.191472	0.198177	0.453361	0
YFR008W	FAR7	0.233605	0.127457	0.366159	0.0841485	0.608966	0.813671	0
YFR009W	GCN20	0.0529071	0.515798	0.761987	0.0601498	0.499045	0.734259	0
YFR010W	UBP6	0.0345149	0.512494	0.759514	0.0328444	0.563799	0.786111	0
YFR011C	MIC19	0.186961	0.000474468	0.00537036	0.246269	2.4986e-05	0.000392489	1
YFR013W	IOC3	-0.168536	0.160024	0.415181	-0.241291	0.072521	0.24546	0
YFR014C	CMK1	0.0989015	0.16119	0.417323	0.091836	0.24158	0.504897	0
YFR015C	GSY1	-0.160731	0.15562	0.408412	-0.174983	0.156898	0.397806	0
YFR016C	YFR016C	0.112575	0.0762157	0.267766	0.140511	0.0470449	0.181906	0
YFR017C	IGD1	0.277112	0.00244297	0.0212665	0.241777	0.0166413	0.0868575	0
YFR018C	YFR018C	-0.120005	0.233454	0.509271	-0.0631207	0.595589	0.806123	0
YFR019W	FAB1	-0.0950703	0.464611	0.725872	-0.132803	0.387904	0.648256	0
YFR020W	CSS2	0.199672	0.154162	0.406113	0.336708	0.0421577	0.170334	0
YFL054C	AQY3	-0.651785	0.000185264	0.0023707	0.582747	0.272497	0.542009	0
YFR021W	ATG18	0.0225174	0.863799	0.940923	-0.20697	0.184598	0.435115	0
YFR022W	ROG3	0.221927	0.101727	0.318282	0.272926	0.091877	0.287725	0
YFR024C-A	LSB3	0.0230091	0.706745	0.874686	-0.00836767	0.908545	0.966013	0
YFR025C	HIS2	-0.141809	0.142357	0.388686	-0.226325	0.0493023	0.18731	0
YFR026C	ULI1	-0.576142	1.25337e-05	0.000214782	-0.890125	1.79273e-09	5.56086e-08	1
YFR027W	ECO1	0.506212	0.000520432	0.00578376	0.628118	0.000284256	0.0031519	1
YFR028C	CDC14	-0.361256	0.000114541	0.00157246	-0.440678	8.04453e-05	0.00105418	1
YFR029W	PTR3	0.503931	0.000207003	0.00260803	0.473649	0.00236055	0.0188421	1
YFR030W	MET10	0.113885	0.052503	0.208514	0.0228116	0.730767	0.881587	0
YFR031C	SMC2	-0.122583	0.177721	0.439538	-0.0715318	0.466302	0.711723	0
YFR031C-A	RPL2A	0.0486803	0.0494878	0.201436	0.0378521	0.124725	0.347711	0
YFR032C-A	RPL29	-0.0126246	0.693268	0.869077	-0.0177014	0.572902	0.792267	0
YFR032C-B	YFR032C-B	0.0365147	0.770213	0.901771	0.0555522	0.682457	0.854553	0
YFR033C	QCR6	0.0586958	0.249321	0.529041	0.0194928	0.705197	0.868166	0
YFR034C	PHO4	-0.19063	0.11925	0.352654	-0.146271	0.290792	0.557798	0
YFR034W-A	YFR034W-A	-0.132518	0.0183514	0.101512	-0.240434	0.000127357	0.00160045	0
YFR036W	CDC26	-0.0386023	0.729344	0.885098	-0.0121437	0.921575	0.968847	0
YFR037C	RSC8	-0.00368789	0.954111	0.981343	-0.0282026	0.691809	0.860699	0
YFR038W	IRC5	-0.0577328	0.587158	0.809405	-0.128245	0.279254	0.548108	0
YFR039C	OSW7	0.0166199	0.79939	0.912817	0.0594337	0.416309	0.670484	0
YFR040W	SAP155	-0.0155406	0.892985	0.952054	0.0490337	0.693426	0.860699	0
YFR041C	ERJ5	0.0799477	0.163293	0.42043	0.0692938	0.254415	0.519262	0
YFR042W	KEG1	0.20641	0.000985355	0.00983548	0.254886	0.000114363	0.00145205	1
YFR043C	IRC6	0.0288576	0.807478	0.917136	-0.00320284	0.979649	0.991996	0
YFR044C	DUG1	0.00419607	0.918145	0.9648	0.01966	0.643446	0.83225	0
YFR045W	YFR045W	-0.125844	0.271696	0.552362	-0.0855859	0.486803	0.72672	0
YFR046C	CNN1	0.0300048	0.808598	0.917984	0.00644553	0.961129	0.985851	0
YFR047C	BNA6	0.0743556	0.110457	0.334581	0.027333	0.580635	0.799135	0
YFR048W	RMD8	-0.217201	0.0495333	0.201436	-0.243709	0.0462896	0.179766	0
YFR049W	YMR31	0.0320708	0.589691	0.809405	-0.0265898	0.678442	0.85367	0
YFR050C	PRE4	-0.00745263	0.802537	0.914302	-0.00578115	0.859454	0.944013	0
YFR051C	RET2	0.0226943	0.628587	0.833975	0.0269484	0.597332	0.806123	0
YFR052W	RPN12	-0.0213441	0.563258	0.794214	0.00217238	0.957224	0.984631	0
YFR052C-A	YFR052C-A	-0.0924687	0.414937	0.685409	-0.14735	0.205075	0.462954	0
YFR053C	HXK1	-0.0623657	0.463316	0.724773	-0.124151	0.123718	0.346086	0
YFL050C	ALR2	0.131115	0.362818	0.642634	0.148705	0.335492	0.603456	0
YFL049W	SWP82	0.324447	0.0145561	0.0861589	0.310127	0.0245281	0.114488	0
YFL048C	EMP47	-0.0430374	0.449081	0.712741	-0.0407196	0.488777	0.728531	0
YFL047W	RGD2	-0.164485	0.0785517	0.271993	-0.139967	0.141531	0.372325	0
YFL046W	FMP32	0.064678	0.443028	0.707949	0.113719	0.186159	0.436428	0
YFL045C	SEC53	-0.0083625	0.730508	0.885098	-0.0155473	0.516835	0.749976	0
YFL044C	OTU1	-0.0178815	0.859288	0.939526	0.013482	0.8962	0.959062	0
YFL042C	LAM5	-0.100807	0.2859	0.567754	-0.101128	0.304814	0.571202	0
YFL041W-A	YFL041W-A	0.154295	0.273293	0.55462	0.14598	0.324896	0.593262	0
YFL041W	FET5	0.260561	0.000101856	0.00142628	0.239331	0.000631178	0.0061431	1
YFL039C	ACT1	-0.00273468	0.84985	0.935618	-0.00713922	0.626096	0.822359	0
YFL038C	YPT1	0.0421957	0.127706	0.366444	0.0625205	0.0285951	0.128213	0
YFL037W	TUB2	-0.0714463	0.0756642	0.266736	-0.0833386	0.0445074	0.175359	0
YFL036W	RPO41	0.311259	0.00639408	0.0456394	0.185241	0.125379	0.348783	0
YFL034C-B	MOB2	-0.0937185	0.276265	0.558341	-0.107805	0.236244	0.49885	0
YFL034C-A	RPL22B	0.102052	0.0174741	0.0975408	0.108933	0.0152425	0.0810233	0
YFL034W	MIL1	-0.296102	0.00284914	0.0243269	-0.380293	0.000503184	0.00505349	1
YFL033C	RIM15	-0.166662	0.251374	0.531715	-0.299052	0.0561026	0.205193	0
YFL032W	YFL032W	-0.235424	0.0596348	0.226215	-0.290529	0.0296152	0.130643	0
YFL031W	HAC1	-0.0376108	0.163334	0.42043	-0.0733985	0.00595923	0.039663	0
YFL030W	AGX1	0.250239	0.0117765	0.0738061	0.239927	0.0205782	0.101667	0
YFL029C	CAK1	-0.296208	0.0146762	0.0865559	-0.410825	0.00140539	0.0122559	0
YFL028C	CAF16	0.0824669	0.185004	0.451953	0.113983	0.0757116	0.253978	0
YFL027C	GYP8	0.244529	0.0189339	0.103914	0.172227	0.113154	0.328147	0
YFL026W	STE2	0.303237	4.97875e-07	1.07493e-05	0.212255	0.000177925	0.00209618	1
YFL025C	BST1	-0.0992084	0.5002	0.750377	-0.186284	0.223876	0.485253	0
YFL024C	EPL1	-0.189187	0.061252	0.23011	-0.263589	0.0121087	0.0681342	0
YFL023W	BUD27	0.0495603	0.683936	0.86302	0.0569641	0.680919	0.854541	0
YFL022C	FRS2	-0.101868	0.0091377	0.0605883	-0.112962	0.0106175	0.0617275	0
YFL021W	GAT1	-0.109975	0.033199	0.15504	-0.0693628	0.209959	0.469011	0
YGR254W	ENO1	-0.0147154	0.6558	0.848488	-0.0245119	0.372485	0.636212	0
YGR255C	COQ6	-0.139178	0.0882032	0.290513	-0.106319	0.226106	0.4886	0
YGR256W	GND2	-0.265295	0.018782	0.103311	-0.28943	0.0101658	0.0595966	0
YGR257C	MTM1	0.0335557	0.609332	0.822229	0.110856	0.130489	0.356679	0
YGR258C	RAD2	-0.118099	0.278543	0.559504	-0.0704241	0.585602	0.801538	0
YGR260W	TNA1	-0.119255	0.0280704	0.137905	-0.184046	0.00460053	0.0327721	0
YGR261C	APL6	-0.0303054	0.771396	0.902509	-0.0209271	0.867066	0.944751	0
YGR262C	BUD32	-0.091771	0.191198	0.461152	-0.0262151	0.748635	0.889901	0
YGR263C	SAY1	0.0183761	0.86811	0.943371	0.0353762	0.783521	0.907505	0
YGR264C	MES1	0.0935253	0.0558941	0.217238	0.15333	0.00674566	0.044022	0
YGR266W	YGR266W	-0.416837	0.0133998	0.0813782	-0.351754	0.0645074	0.228237	0
YGR267C	FOL2	0.0169647	0.649526	0.846034	0.0391965	0.348615	0.615034	0
YGR268C	HUA1	0.108797	0.418741	0.6896	0.293681	0.0524305	0.195557	0
YGR270W	YTA7	-0.0568295	0.362364	0.642198	-0.0359208	0.611154	0.815156	0
YGR271W	SLH1	-0.0209569	0.886663	0.951149	-0.0502612	0.759137	0.895505	0
YGR271C-A	EFG1	-0.202294	0.188269	0.457919	-0.0998937	0.556037	0.780395	0
YGR274C	TAF1	-0.150167	0.14517	0.392773	-0.0303844	0.789973	0.910979	0
YGR275W	RTT102	-0.460866	0.000783725	0.00810345	-0.401786	0.00839456	0.0523041	0
YGR277C	CAB4	0.0510159	0.490712	0.742627	0.0730054	0.332449	0.600122	0
YGR278W	CWC22	-0.266316	0.0588311	0.224208	-0.238693	0.0952692	0.294109	0
YGR279C	SCW4	-0.225534	6.81697e-14	3.27549e-12	-0.211532	2.63773e-12	1.08635e-10	1
YGR280C	PXR1	0.0980193	0.315249	0.597925	0.137246	0.168678	0.415632	0
YGR281W	YOR1	-0.105024	0.23727	0.513407	-0.0896126	0.316571	0.584499	0
YGR282C	BGL2	-0.30093	4.09678e-55	1.05675e-52	-0.278224	3.35876e-48	1.17581e-45	1
YGR283C	YGR283C	-0.0207473	0.846013	0.934902	-0.00922099	0.932673	0.974093	0
YGR284C	ERV29	0.0721747	0.0592439	0.22543	0.0774872	0.045284	0.177621	0
YGR285C	ZUO1	-0.0100906	0.7334	0.885421	-0.0226377	0.452447	0.697767	0
YGR286C	BIO2	0.195449	1.99612e-05	0.000320754	0.219824	1.63019e-06	3.17047e-05	1
YGR287C	IMA1	0.561812	0.000273617	0.0033111	0.593694	0.000290836	0.00321758	1
YGR295C	COS6	-2.53566	2.12428e-102	2.60277e-99	-1.84414	5.72984e-67	4.01171e-64	1
YGL206C	CHC1	-0.0128099	0.84477	0.934902	-0.0431396	0.528102	0.761467	0
YGL205W	POX1	0.633803	9.57443e-05	0.00135228	0.613423	0.000298893	0.00329927	1
YGL204C	YGL204C	0.330506	0.0227892	0.1192	0.265071	0.0789768	0.260475	0
YGL203C	KEX1	-0.0874098	0.239936	0.516892	-0.127912	0.0979126	0.299121	0
YGL202W	ARO8	-0.0520636	0.127617	0.366405	-0.0706513	0.0433055	0.173338	0
YGL201C	MCM6	0.0881325	0.438625	0.703897	0.105187	0.372704	0.636212	0
YGL200C	EMP24	-0.0305832	0.314244	0.597034	4.13156e-05	0.998914	0.999326	0
YGL198W	YIP4	-0.045322	0.398217	0.672307	-0.0470583	0.400856	0.660369	0
YGL197W	MDS3	0.083518	0.474716	0.733167	0.106886	0.386544	0.647799	0
YGL196W	DSD1	-0.0682546	0.296756	0.578981	-0.0362621	0.59619	0.806123	0
YGL195W	GCN1	-0.0477469	0.528133	0.770351	-0.0445197	0.574142	0.792863	0
YGL194C-A	YGL194C-A	-0.286019	0.00023544	0.00291387	-0.323503	5.44896e-05	0.000763011	1
YGL194C	HOS2	-0.13948	0.320044	0.602316	-0.0562379	0.701904	0.865852	0
YGL193C	YGL193C	-0.00274064	0.978998	0.992462	0.018376	0.865624	0.944751	0
YGL191W	COX13	-0.0305981	0.404252	0.676109	-0.0141558	0.679431	0.854257	0
YGL190C	CDC55	-0.0933677	0.168395	0.426991	-0.108768	0.122545	0.344375	0
YGL189C	RPS26A	-0.0052688	0.833377	0.930595	0.00661198	0.793733	0.912203	0
YGL187C	COX4	-0.076257	0.0347177	0.159557	-0.0685698	0.0568629	0.207201	0
YGL186C	TPN1	-0.0263404	0.642934	0.843195	-0.0405023	0.490208	0.729367	0
YGL185C	YGL185C	-0.0827027	0.41328	0.684069	-0.0611815	0.558022	0.781459	0
YGL184C	STR3	-0.0699421	0.612627	0.823453	-0.0314127	0.826433	0.928866	0
YGL181W	GTS1	-0.12567	0.0777859	0.270949	-0.161757	0.0277211	0.124987	0
YGL180W	ATG1	-0.103752	0.545414	0.781601	-0.0949343	0.592405	0.804483	0
YGL179C	TOS3	-0.335359	0.00100447	0.00998566	-0.338166	0.00175525	0.01468	1
YGL178W	MPT5	0.523055	4.91235e-07	1.06529e-05	0.586727	1.71118e-07	4.11102e-06	1
YGL176C	YGL176C	-0.144637	0.262594	0.541782	-0.185615	0.181479	0.431728	0
YGL174W	BUD13	0.0730126	0.623127	0.828645	0.0629598	0.692508	0.860699	0
YGL173C	XRN1	0.0806082	0.231898	0.509121	0.0644221	0.371541	0.635473	0
YGL172W	NUP49	0.00481987	0.95548	0.982133	0.0680006	0.465851	0.711723	0
YGL171W	ROK1	-0.0471189	0.675203	0.859971	-0.00875053	0.942501	0.97793	0
YGL169W	SUA5	0.778888	1.50094e-17	9.94072e-16	0.945613	4.60183e-21	4.02743e-19	1
YGL167C	PMR1	-0.148353	0.0190786	0.104263	-0.150134	0.0279388	0.125738	0
YGL166W	CUP2	-0.0753816	0.448456	0.712672	-0.0934489	0.382626	0.645803	0
YGL164C	YRB30	0.194951	0.0350769	0.160515	0.21676	0.0298392	0.131465	0
YGL163C	RAD54	0.153922	0.271669	0.552362	0.16007	0.304681	0.571202	0
YGL161C	YIP5	0.0313615	0.574297	0.800976	0.0149905	0.808638	0.920162	0
YGL160W	AIM14	-0.113004	0.230678	0.506975	-0.173077	0.0966496	0.296606	0
YGL159W	YGL159W	0.0713018	0.43511	0.70236	0.070993	0.482524	0.723417	0
YGL157W	ARI1	0.0264051	0.609988	0.822318	0.0311148	0.559513	0.782584	0
YGL156W	AMS1	0.0218065	0.776167	0.904636	0.07834	0.340047	0.606499	0
YGL155W	CDC43	0.0765397	0.424763	0.695466	0.0840246	0.410593	0.667254	0
YGL154C	LYS5	-0.0114925	0.899139	0.954486	-0.0171552	0.86175	0.944629	0
YGL153W	PEX14	-0.134349	0.122049	0.357111	-0.176732	0.0585659	0.212401	0
YGL151W	NUT1	-0.221798	0.056209	0.218116	-0.203067	0.106021	0.312833	0
YGL150C	INO80	0.255853	0.00298819	0.0251635	0.257318	0.00597252	0.039663	1
YGL148W	ARO2	-0.0402328	0.359455	0.638524	-0.000249518	0.995788	0.998335	0
YGL147C	RPL9A	0.055525	0.0949414	0.303132	-0.012547	0.68217	0.854553	0
YGL145W	TIP20	-0.228968	0.0164307	0.0933103	-0.147094	0.147551	0.3823	0
YGL144C	ROG1	0.106011	0.415892	0.68649	0.045608	0.746162	0.888901	0
YGL143C	MRF1	0.00209366	0.983032	0.993779	-0.0471094	0.659768	0.84387	0
YGL142C	GPI10	-0.00930909	0.91879	0.965238	-0.0199349	0.840427	0.936328	0
YGL141W	HUL5	0.0197724	0.843374	0.934902	0.0539642	0.622443	0.820714	0
YGL140C	YGL140C	-0.055546	0.491209	0.742801	-0.120351	0.177587	0.427481	0
YGL139W	FLC3	0.129072	0.239683	0.516626	0.176576	0.150596	0.387033	0
YGL137W	SEC27	0.101323	0.0129507	0.0795381	0.0553891	0.223231	0.485022	0
YGL136C	MRM2	-0.0256635	0.792198	0.910331	0.0349897	0.748361	0.889901	0
YGL135W	RPL1B	0.0367523	0.113484	0.340382	0.0119058	0.624521	0.822347	0
YGL134W	PCL10	-0.17392	0.0885	0.2911	-0.173902	0.129724	0.355778	0
YGL133W	ITC1	0.088811	0.364786	0.644258	0.126937	0.24998	0.515202	0
YGL253W	HXK2	-0.393168	1.32617e-28	1.54752e-26	-0.307673	4.82251e-18	3.23769e-16	1
YGL252C	RTG2	0.116953	0.0438992	0.188563	0.171923	0.00421623	0.0302988	0
YGL131C	SNT2	0.0996362	0.530635	0.771704	0.0551688	0.763158	0.896701	0
YGL130W	CEG1	-0.0198751	0.814727	0.922166	0.0862421	0.372517	0.636212	0
YGL129C	RSM23	0.036909	0.798399	0.912417	0.0172068	0.916522	0.968285	0
YGL128C	CWC23	0.0791325	0.476118	0.73373	0.0902568	0.473919	0.717318	0
YGL127C	SOH1	0.0131293	0.83744	0.93089	0.0755768	0.298648	0.565253	0
YGL126W	SCS3	0.337423	1.07324e-05	0.000185247	0.690444	1.4884e-15	8.58192e-14	1
YGL125W	MET13	-0.653184	3.5278e-06	6.83388e-05	-0.852616	2.24326e-07	5.16161e-06	1
YGL124C	MON1	-1.15381	1.25942e-10	4.40887e-09	-1.39203	3.82705e-11	1.38936e-09	1
YGL123W	RPS2	0.0570367	0.00361334	0.0293681	0.0393416	0.0536035	0.199174	0
YGL122C	NAB2	0.0981415	0.149606	0.401106	0.0993189	0.204894	0.462954	0
YGL121C	GPG1	-0.0977592	0.10724	0.328526	-0.0929408	0.149913	0.386339	0
YGL120C	PRP43	0.125453	0.0778957	0.270949	0.173882	0.0350801	0.148213	0
YGL119W	COQ8	-0.0190328	0.848145	0.935618	0.122149	0.278255	0.547901	0
YGL117W	YGL117W	0.0143938	0.872799	0.945115	0.110074	0.265906	0.533227	0
YGL116W	CDC20	0.181923	0.0898927	0.293909	0.264174	0.027028	0.122994	0
YGL115W	SNF4	0.0237677	0.633074	0.837209	0.0146536	0.793795	0.912203	0
YGL114W	YGL114W	0.122157	0.207919	0.484627	0.305163	0.0054644	0.0370415	0
YGL113W	SLD3	-0.20196	0.0835097	0.282096	-0.175087	0.185033	0.435356	0
YGL112C	TAF6	-0.283489	0.000672614	0.00715072	-0.353596	0.000165113	0.00196891	1
YGL111W	NSA1	-0.152117	0.0841811	0.283686	-0.126975	0.193265	0.447212	0
YGL110C	CUE3	-0.018497	0.854398	0.937618	-0.0204701	0.854374	0.942287	0
YGL108C	YGL108C	-0.113589	0.449819	0.713469	-0.153013	0.36331	0.628737	0
YGL107C	RMD9	0.0687909	0.492979	0.744329	0.0869872	0.436399	0.685072	0
YGL106W	MLC1	0.14084	0.0028646	0.0244122	0.19436	0.000173086	0.00204408	1
YGL105W	ARC1	0.0602042	0.0544926	0.213996	0.0355322	0.296677	0.56379	0
YGL104C	VPS73	0.358216	0.0002325	0.00288477	0.40815	0.000139524	0.00172063	1
YGL103W	RPL28	-0.0032181	0.877686	0.946225	0.0083823	0.688008	0.859308	0
YGL101W	YGL101W	0.154525	0.0681555	0.248129	0.0981165	0.289395	0.556205	0
YGL100W	SEH1	0.0120057	0.803206	0.914302	-0.0121812	0.818122	0.923875	0
YGL099W	LSG1	-0.157971	0.0855303	0.28543	-0.340635	0.000735552	0.0070135	0
YGL251C	HFM1	0.0509187	0.769403	0.901468	0.226254	0.229108	0.49125	0
YGL250W	RMR1	0.133319	0.186983	0.455696	0.215386	0.0481774	0.184467	0
YGL098W	USE1	0.0891869	0.510683	0.75778	0.194716	0.202569	0.4592	0
YGL097W	SRM1	0.127213	0.113968	0.341507	0.1836	0.0408417	0.166527	0
YGL096W	TOS8	-0.164361	0.0418846	0.181983	-0.219123	0.0170572	0.0883196	0
YGL095C	VPS45	-0.069584	0.285237	0.567579	-0.16131	0.0289511	0.129155	0
YGL094C	PAN2	-0.0636133	0.526503	0.769807	-0.0689537	0.544348	0.774187	0
YGL093W	SPC105	0.186789	0.111179	0.335521	0.130075	0.329337	0.597258	0
YGL092W	NUP145	0.168291	0.0659226	0.241916	0.118292	0.255761	0.520395	0
YGL091C	NBP35	-0.0480051	0.549221	0.784762	-0.0573119	0.528964	0.762261	0
YGL090W	LIF1	0.126703	0.366676	0.645734	0.0259348	0.871828	0.946572	0
YGL088W	YGL088W	0.0451515	0.76637	0.900283	0.249244	0.162702	0.405595	0
YGL087C	MMS2	-0.00460806	0.927113	0.968617	-0.00284506	0.960388	0.985731	0
YGL086W	MAD1	-0.173824	0.044878	0.190595	-0.219187	0.027535	0.124492	0
YGL248W	PDE1	-0.242066	0.000117114	0.00159437	-0.210262	0.00189092	0.0156544	1
YGL247W	BRR6	0.00196532	0.98546	0.995207	0.0788922	0.500894	0.735876	0
YGL246C	RAI1	0.024415	0.765245	0.899636	-0.0294642	0.74062	0.88661	0
YGL085W	LCL3	0.102395	0.262377	0.541782	0.145284	0.152649	0.390262	0
YGL084C	GUP1	-0.13967	0.184088	0.451559	-0.0809501	0.491367	0.729691	0
YGL083W	SCY1	0.14017	0.358409	0.637823	0.17776	0.295847	0.563304	0
YGL082W	YGL082W	-0.0170014	0.803463	0.914302	-0.0123042	0.864816	0.944751	0
YGL080W	MPC1	0.149885	0.00417706	0.0332334	0.196681	0.000385885	0.00410243	1
YGL079W	KXD1	0.144416	0.138134	0.382051	0.144964	0.15986	0.401575	0
YGL078C	DBP3	-0.112005	0.0786316	0.271993	-0.0738593	0.268435	0.53676	0
YGL077C	HNM1	0.0728637	0.038288	0.169512	0.102337	0.00531455	0.0365823	0
YGL076C	RPL7A	-0.00855206	0.710905	0.876281	-0.0139044	0.544895	0.774515	0
YGL075C	MPS2	0.457715	0.00631232	0.0454951	0.395193	0.0239708	0.113317	0
YGL073W	HSF1	0.165577	0.0533546	0.21088	0.165213	0.0687684	0.238058	0
YGL072C	YGL072C	0.194489	0.0270478	0.13366	0.226945	0.0157992	0.0832601	0
YGL071W	AFT1	0.0119107	0.853034	0.937461	0.0162027	0.812197	0.92143	0
YGL070C	RPB9	0.116651	0.068148	0.248129	0.146522	0.0301567	0.132261	0
YGL068W	MNP1	0.0612313	0.277114	0.558391	0.116333	0.0487303	0.186333	0
YGL067W	NPY1	-0.160506	0.0470855	0.196343	-0.129064	0.136087	0.364459	0
YGL066W	SGF73	0.199076	0.0506259	0.204212	0.183709	0.09216	0.288059	0
YGL065C	ALG2	0.0973723	0.245882	0.525338	0.161955	0.0720929	0.244846	0
YGL064C	MRH4	0.00620022	0.969847	0.987374	-0.0434443	0.814863	0.922887	0
YGL062W	PYC1	0.183432	4.01532e-06	7.68714e-05	0.220504	1.02261e-06	2.04563e-05	1
YGL061C	DUO1	0.177176	0.174112	0.43523	0.226967	0.117715	0.335031	0
YGL060W	YBP2	0.106657	0.412666	0.683731	0.111803	0.434173	0.68289	0
YGL059W	PKP2	-0.213135	0.0452378	0.19113	-0.237066	0.0433301	0.173338	0
YGL058W	RAD6	0.0447164	0.376997	0.654388	0.058193	0.287941	0.55559	0
YGL057C	GEP7	-0.473225	5.05219e-05	0.000759534	-0.509994	5.99984e-05	0.000823675	1
YGL056C	SDS23	0.0711532	0.340854	0.621244	0.10817	0.180467	0.431237	0
YGL055W	OLE1	-0.687697	6.80006e-57	2.08294e-54	-0.699449	4.20063e-58	2.05873e-55	1
YGL054C	ERV14	0.0621509	0.0483977	0.199231	0.0690776	0.0355239	0.149316	0
YGL049C	TIF4632	-0.217169	0.0213481	0.113602	-0.215438	0.028725	0.12845	0
YGL048C	RPT6	0.0521942	0.191462	0.461562	0.0676561	0.104327	0.31019	0
YGL047W	ALG13	0.0459391	0.601382	0.816105	0.0303174	0.74243	0.887163	0
YGL045W	RIM8	-0.00238456	0.975994	0.990882	-0.0343218	0.680374	0.854541	0
YGL044C	RNA15	0.122922	0.268232	0.548757	0.136885	0.247637	0.512097	0
YGL043W	DST1	0.0339571	0.616464	0.825715	0.0469763	0.514447	0.748161	0
YGL041W-A	YGL041W-A	0.132743	0.152493	0.403862	0.131209	0.183584	0.434588	0
YGL040C	HEM2	0.205005	0.00301128	0.0253144	0.216219	0.00333285	0.0247865	1
YGL039W	YGL039W	0.137153	0.103469	0.321236	0.0755628	0.399979	0.659144	0
YGL038C	OCH1	0.0400202	0.584772	0.808225	0.0439364	0.571362	0.790806	0
YGL037C	PNC1	0.0607228	0.121571	0.356779	0.0714732	0.0689652	0.238531	0
YGL036W	YGL036W	0.0551566	0.710512	0.876251	0.112813	0.495923	0.732305	0
YGL245W	GUS1	-0.0426019	0.137885	0.381578	-0.0354514	0.273943	0.543671	0
YGL244W	RTF1	-0.14731	0.0912876	0.296488	-0.174686	0.0758852	0.254387	0
YGL243W	TAD1	-0.169224	0.0786562	0.271993	-0.182141	0.0957143	0.294473	0
YGL032C	AGA2	0.0572652	0.547725	0.783549	0.0300426	0.737284	0.884359	0
YGL031C	RPL24A	0.0198303	0.424253	0.695174	-0.00673952	0.793927	0.912203	0
YGL030W	RPL30	-0.0254316	0.23716	0.513407	-0.0193371	0.391162	0.651183	0
YGL029W	CGR1	-0.271158	0.0299092	0.143993	-0.22818	0.108656	0.317569	0
YGL028C	SCW11	-0.020546	0.783625	0.907771	-0.0304714	0.718838	0.875387	0
YGL027C	CWH41	-0.163002	0.0284585	0.138643	-0.213108	0.0107027	0.0620759	0
YGL242C	YGL242C	-0.0522601	0.337086	0.617593	-0.104853	0.087107	0.277756	0
YGL241W	KAP114	0.447427	0.000213544	0.00268013	0.436478	0.00128491	0.0113466	1
YGL026C	TRP5	0.0445497	0.222155	0.499855	0.0666857	0.101458	0.305059	0
YGL025C	PGD1	-0.0653274	0.632171	0.836692	-0.0434236	0.776703	0.905747	0
YGL023C	PIB2	0.133605	0.137659	0.381339	0.0991635	0.322042	0.590913	0
YGL022W	STT3	-0.064917	0.121957	0.357108	-0.0330811	0.465695	0.711723	0
YGL021W	ALK1	0.0689712	0.416541	0.6869	0.0727209	0.414565	0.669851	0
YGL020C	GET1	0.00938887	0.857599	0.93861	0.0177731	0.746739	0.889123	0
YGL019W	CKB1	-0.0450999	0.399653	0.673023	-0.0461969	0.413162	0.668727	0
YGL018C	JAC1	0.278302	0.0550256	0.215016	0.344787	0.0251246	0.116606	0
YGL017W	ATE1	0.016151	0.880768	0.948505	0.0667358	0.558962	0.782036	0
YGL016W	KAP122	-0.1941	0.232941	0.509266	-0.252441	0.143038	0.374123	0
YGL014W	PUF4	-0.933803	6.84783e-15	3.49596e-13	-0.940786	1.09357e-14	5.76297e-13	1
YGL013C	PDR1	0.00614482	0.958228	0.983304	0.0609929	0.61007	0.814055	0
YGL012W	ERG4	0.117895	0.00288997	0.0245472	0.143448	0.000345084	0.00370078	1
YGL011C	SCL1	0.00146681	0.964797	0.985026	0.00915881	0.785189	0.908082	0
YGL010W	MPO1	0.309541	0.00036464	0.00426515	0.309701	0.000415115	0.00434718	1
YGL009C	LEU1	-0.0835787	0.121232	0.356423	-0.073948	0.177989	0.42803	0
YGL008C	PMA1	-0.0578132	0.0196082	0.106188	-0.0552991	0.0242366	0.113923	0
YGL006W-A	YGL006W-A	0.268168	0.00340874	0.0279837	0.232512	0.0131043	0.0722311	0
YGL006W	PMC1	0.0702824	0.344036	0.624258	0.0798231	0.297754	0.564741	0
YGL005C	COG7	-0.198373	0.00250127	0.0216969	-0.187498	0.00539435	0.0368671	1
YGL004C	RPN14	0.225323	0.0242078	0.123844	0.241938	0.0180143	0.0922883	0
YGL003C	CDH1	-0.0118163	0.912602	0.962069	0.00430687	0.968863	0.987298	0
YGL002W	ERP6	-0.0876116	0.13562	0.378085	-0.0502619	0.403704	0.662451	0
YGL001C	ERG26	0.0699038	0.132645	0.375127	0.0594697	0.210502	0.469624	0
YGR001C	EFM5	-0.175276	0.000605456	0.00657947	-0.182559	0.000478734	0.00488712	1
YGR002C	SWC4	0.0425497	0.688965	0.865912	0.0646421	0.553064	0.778675	0
YGR003W	CUL3	0.240249	0.075569	0.266641	0.260403	0.0602372	0.216916	0
YGR004W	PEX31	-0.155262	0.102806	0.320119	-0.158648	0.104334	0.31019	0
YGR005C	TFG2	-0.0269196	0.690571	0.866929	-0.0382303	0.581402	0.799502	0
YGR007W	ECT1	-0.112087	0.0440039	0.188681	-0.141764	0.0131463	0.0722311	0
YGR008C	STF2	-0.0583491	0.244672	0.524821	-0.100013	0.034875	0.147474	0
YGL238W	CSE1	0.0898938	0.178641	0.440845	0.140771	0.0653951	0.230411	0
YGR009C	SEC9	0.143259	0.0602959	0.227666	0.149829	0.0559813	0.204903	0
YGR010W	NMA2	-0.0519549	0.765734	0.899751	0.000554251	0.997558	0.998946	0
YGR011W	YGR011W	-0.0897023	0.34976	0.631002	-0.120301	0.226951	0.489348	0
YGR012W	MCY1	0.158078	0.0870135	0.288312	0.218682	0.0225701	0.109054	0
YGR013W	SNU71	0.0199616	0.825045	0.927481	0.081637	0.383852	0.645871	0
YGR014W	MSB2	0.00587733	0.939328	0.974729	0.0190708	0.813403	0.922157	0
YGR015C	YGR015C	-0.200904	0.0502345	0.203135	-0.245522	0.0218782	0.106374	0
YGR017W	YGR017W	0.032731	0.571212	0.798037	0.0259414	0.66724	0.847187	0
YGL237C	HAP2	-0.23772	0.0285335	0.138871	-0.259407	0.0389545	0.16003	0
YGR019W	UGA1	0.0588434	0.286608	0.56823	0.0789056	0.158969	0.400982	0
YGR020C	VMA7	-0.039025	0.197455	0.470456	-0.0520425	0.0960649	0.295144	0
YGR021W	YGR021W	0.0875061	0.374736	0.65289	0.102216	0.316638	0.584499	0
YGR023W	MTL1	0.196337	0.0768397	0.268994	0.212337	0.0654452	0.230422	0
YGL236C	MTO1	0.183904	0.293791	0.574909	0.409961	0.0471762	0.182055	0
YGR028W	MSP1	0.126983	0.0349194	0.160094	0.145411	0.0185012	0.0940605	0
YGR029W	ERV1	0.243853	0.00816913	0.0557617	0.318935	0.000827963	0.00775879	0
YGR030C	POP6	0.430137	0.00118782	0.0115966	0.437579	0.00140093	0.0122388	1
YGR031W	IMO32	-0.100724	0.405283	0.677222	-0.103001	0.411707	0.668294	0
YGR032W	GSC2	0.0347983	0.504251	0.753641	0.063735	0.223213	0.485022	0
YGR033C	TIM21	0.211035	0.000265478	0.00322855	0.227708	0.00014658	0.0017915	1
YGR034W	RPL26B	-0.0165379	0.532295	0.772957	0.00352918	0.890832	0.956191	0
YGR036C	CAX4	0.107239	0.468074	0.728264	0.0682907	0.658048	0.84206	0
YGR037C	ACB1	0.0206433	0.562826	0.794214	0.0350274	0.305083	0.571202	0
YGR038W	ORM1	-0.476007	5.26216e-13	2.32341e-11	-0.490847	1.79249e-12	7.57328e-11	1
YGL234W	ADE5,7	0.000392753	0.992991	0.997264	0.0154719	0.763321	0.896701	0
YGL233W	SEC15	-0.135593	0.111856	0.336737	-0.153153	0.119264	0.337674	0
YGL232W	TAN1	0.065743	0.395308	0.669687	0.0414505	0.641723	0.831153	0
YGR040W	KSS1	-0.55406	2.81518e-06	5.47507e-05	-0.53162	2.85671e-05	0.000440275	1
YGR041W	BUD9	0.208612	0.0543729	0.213738	0.278457	0.0203622	0.101212	0
YGR042W	MTE1	0.0681133	0.476378	0.73373	0.07337	0.485858	0.726557	0
YGR043C	NQM1	-0.31992	0.0239501	0.122983	-0.382789	0.0131389	0.0722311	0
YGR044C	RME1	0.0652748	0.386075	0.66081	0.0646992	0.447326	0.693358	0
YGR046W	TAM41	0.0458737	0.605806	0.819685	0.141327	0.164842	0.409889	0
YGR047C	TFC4	0.0908725	0.3932	0.668405	-0.0146777	0.903172	0.962481	0
YGR048W	UFD1	0.0909727	0.205638	0.481526	0.103852	0.199977	0.455431	0
YGR049W	SCM4	0.900302	1.77124e-20	1.40014e-18	0.836871	9.84774e-17	6.18766e-15	1
YGR050C	YGR050C	0.311258	0.0242792	0.12408	0.452453	0.00449422	0.0321081	0
YGR052W	FMP48	-0.336116	0.0654276	0.240736	-0.306571	0.143106	0.374123	0
YGR054W	YGR054W	0.0153693	0.773681	0.903435	0.00594702	0.921661	0.968847	0
YGR055W	MUP1	0.586722	0.000432894	0.00500381	0.597928	0.0020371	0.0166675	1
YGR056W	RSC1	0.188105	0.137721	0.381339	0.153264	0.289752	0.556456	0
YGR057C	LST7	-0.0603637	0.56866	0.79697	-0.168047	0.170845	0.418864	0
YGR058W	PEF1	-0.29391	0.0215252	0.114049	-0.429552	0.00365949	0.026729	0
YGR060W	ERG25	-0.0555249	0.107828	0.32988	0.00531645	0.874248	0.94794	0
YGR061C	ADE6	-0.0148104	0.834683	0.93089	-0.0295479	0.711193	0.871932	0
YGR062C	COX18	0.0957197	0.298101	0.58045	0.212792	0.0434811	0.173676	0
YGR063C	SPT4	0.0457077	0.432117	0.70124	0.0159198	0.81368	0.922259	0
YGR065C	VHT1	0.127508	0.000152709	0.00200115	0.0625032	0.0974835	0.298777	0
YGR070W	ROM1	-0.0385091	0.7768	0.904783	-0.175862	0.264903	0.532087	0
YGR071C	ENV11	-0.0758927	0.589919	0.809405	-0.171186	0.289029	0.556205	0
YGR072W	UPF3	-0.05365	0.557745	0.792091	-0.0839263	0.420912	0.673927	0
YGR073C	YGR073C	-0.186468	0.146455	0.395469	-0.0627985	0.669143	0.848577	0
YGR074W	SMD1	0.0818813	0.195635	0.468624	0.0919492	0.201412	0.457423	0
YGR076C	MRPL25	-0.00143308	0.987769	0.996443	-0.0270427	0.798142	0.914375	0
YGR077C	PEX8	-0.030317	0.693488	0.869077	-0.0181836	0.833885	0.932224	0
YGR078C	PAC10	-0.0395389	0.589162	0.809405	-0.0240424	0.770828	0.902275	0
YGR079W	YGR079W	0.271528	0.0444338	0.18953	0.254107	0.0859823	0.275965	0
YGR080W	TWF1	-0.0479683	0.379188	0.655702	-0.0506703	0.39	0.650002	0
YGR081C	SLX9	0.0689912	0.543228	0.780751	-0.00342495	0.977808	0.990933	0
YGR082W	TOM20	0.0436049	0.27802	0.55889	0.01339	0.755452	0.893022	0
YGR083C	GCD2	0.0268569	0.734233	0.885532	-0.0285622	0.736334	0.883853	0
YGR084C	MRP13	-0.0491405	0.539237	0.777165	-0.0630552	0.455782	0.701786	0
YGR085C	RPL11B	0.0288144	0.249402	0.529041	-0.0349558	0.168146	0.414529	0
YGR086C	PIL1	-0.0352564	0.302491	0.585668	-0.0277534	0.394581	0.654277	0
YGR088W	CTT1	-0.0403227	0.71174	0.876281	-0.22821	0.0322782	0.139379	0
YGR089W	NNF2	0.0190671	0.871815	0.944556	-0.0164384	0.901107	0.961534	0
YGR090W	UTP22	-0.000901863	0.993783	0.997446	0.0811215	0.543427	0.773327	0
YGR091W	PRP31	-0.10253	0.555269	0.790407	-0.0223025	0.910746	0.966013	0
YGR092W	DBF2	0.030609	0.732017	0.88531	0.111409	0.277676	0.546981	0
YGR093W	DRN1	0.0268549	0.80093	0.91353	-0.0249913	0.83885	0.935428	0
YGR094W	VAS1	-0.0484692	0.226004	0.502451	0.00823157	0.860812	0.944629	0
YGR095C	RRP46	0.015273	0.846186	0.934902	0.0201392	0.82773	0.928922	0
YGR097W	ASK10	-0.173017	0.140547	0.385893	-0.0724296	0.599106	0.807218	0
YGR098C	ESP1	0.18314	0.210553	0.48732	0.0796384	0.644593	0.832543	0
YGR099W	TEL2	-0.081549	0.458845	0.720538	-0.0690955	0.590461	0.8034	0
YGL231C	EMC4	-0.0785655	0.218136	0.495864	-0.0426051	0.530989	0.763833	0
YGL229C	SAP4	-0.189142	0.216061	0.492977	-0.230299	0.158506	0.400348	0
YGL228W	SHE10	0.0393212	0.48961	0.742624	0.00678401	0.910331	0.966013	0
YGL227W	VID30	-0.116435	0.273	0.554486	-0.182074	0.106976	0.314699	0
YGR100W	MDR1	-0.0913709	0.319032	0.601837	-0.134628	0.198369	0.453361	0
YGR101W	PCP1	0.0132303	0.878762	0.947159	0.0450116	0.648408	0.833862	0
YGR102C	GTF1	-0.0408795	0.552733	0.788171	-0.0668404	0.394622	0.654277	0
YGR103W	NOP7	-0.0557796	0.397947	0.672307	-0.0544051	0.464191	0.711355	0
YGR104C	SRB5	-0.0931082	0.330002	0.609534	-0.0541657	0.617352	0.817741	0
YGR105W	VMA21	0.0262847	0.592434	0.811719	0.0667977	0.230907	0.492761	0
YGR106C	VOA1	0.0079372	0.826214	0.927881	0.0178372	0.6649	0.846178	0
YGR108W	CLB1	-0.143663	0.078828	0.271993	-0.279588	0.00230054	0.0184533	0
YGR111W	YGR111W	-0.00510039	0.931751	0.970016	-0.0534553	0.441353	0.689975	0
YGR112W	SHY1	0.122081	0.218739	0.496446	0.189194	0.103906	0.31019	0
YGR113W	DAM1	-0.00309398	0.969191	0.987374	0.0035321	0.969772	0.987298	0
YGR116W	SPT6	-0.0815581	0.165291	0.423025	-0.110469	0.109576	0.319935	0
YGR117C	YGR117C	-0.0179998	0.834067	0.93089	-0.047969	0.631499	0.826332	0
YGR118W	RPS23A	0.0410665	0.0316896	0.149974	0.0141596	0.501265	0.736201	0
YGR119C	NUP57	0.125562	0.200961	0.475573	0.033248	0.776944	0.905747	0
YGR120C	COG2	-0.155035	0.169537	0.429185	-0.153574	0.251342	0.516695	0
YGR121C	MEP1	0.155823	0.0492833	0.201113	0.185602	0.0475659	0.183127	0
YGL226C-A	OST5	0.0621852	0.115758	0.345513	0.0320879	0.439403	0.687805	0
YGL226W	MTC3	-0.138548	0.0929064	0.298983	-0.13171	0.128254	0.352735	0
YGR122W	YGR122W	-0.173691	0.101392	0.317804	-0.163985	0.196628	0.451236	0
YGR123C	PPT1	0.0523054	0.570788	0.798037	0.0777897	0.478388	0.720301	0
YGR124W	ASN2	0.0223732	0.611853	0.823138	-0.00629718	0.902507	0.9624	0
YGR125W	YGR125W	-0.0200459	0.771905	0.902554	0.00882287	0.91303	0.966889	0
YGR127W	YGR127W	-0.12453	0.120826	0.355959	0.047096	0.613995	0.816619	0
YGR128C	UTP8	-0.0358022	0.697346	0.870301	0.0152906	0.885893	0.953814	0
YGR130C	YGR130C	-0.0332959	0.55719	0.792091	-0.0516964	0.430707	0.679296	0
YGR132C	PHB1	0.0806301	0.0559458	0.217267	0.0515345	0.286767	0.554415	0
YGR133W	PEX4	0.0555657	0.557743	0.792091	0.0524497	0.623103	0.821142	0
YGR134W	CAF130	0.184446	0.201595	0.476238	0.153405	0.345218	0.612072	0
YGR135W	PRE9	-0.0823088	0.0185609	0.102325	-0.0611244	0.116463	0.333406	0
YGR137W	YGR137W	-0.0869786	0.197968	0.47099	-0.0130525	0.864044	0.944751	0
YGR138C	TPO2	0.000407255	0.993501	0.997368	0.0303002	0.581866	0.799699	0
YGR140W	CBF2	-0.127836	0.404884	0.676787	-0.0145164	0.932881	0.974093	0
YGR141W	VPS62	-0.129579	0.086244	0.286634	-0.147286	0.083929	0.27133	0
YGL225W	VRG4	0.0558574	0.153117	0.404108	0.0275934	0.492501	0.730173	0
[truncated: 2,903 more rows]
