# Supplementary material for: Single-cell eQTL mapping in yeast reveals a tradeoff between growth and reproduction
Source: eLife. 2025 Mar 12;13:RP95566. doi: 10.7554/eLife.95566 (PMC11903034; doi:10.7554/eLife.95566)
Supplement: Supplementary file 2. — Each sheet has the local eQTL summary statistics for the three crosses we examined (Table S1 cross A=BY and RM, Table S2 cross B=YJM145 and YPS163, Table S3 cross C=CBS2888xYJM981). The column ‘has cell-cycle interaction’ is set to 1 if a cell-cycle interaction was observed at a FDR of <5%. For cross A, the summary statistics from bulk eQTL are provided in additional columns. For cross A, the summary statistics from bulk eQTL7 are provided in additional columns. Missing values in the bulk eQTL columns indicate that a gene did not pass our filtering criteria, and a local eQTL test was not performed. [file elife-95566-supp2.xlsx]

## Sheet: S1 (Cross A)
Supplementary File 2: Local eQTL summary statistics for our one-pot eQTL experiments. Each sheet has the local eQTL summary statistics for the three crosses we examined (Table S1 cross A=BY and RM, Table S2 cross B=YJM145 and YPS163, Table S3 cross C=CBS2888xYJM981). The column ‘has cell-cycle interaction’ is set to 1 if a cell-cycle interaction was observed at a FDR of <5%. For cross A, the summ…
transcript	gene name	closest marker	estimate (one-pot)	LOD (one-pot)	FDR (one-pot)	estimate (bulk)	p-value (bulk)	adjusted p-value (bulk)	has cell-cycle interaction
YAL001C	TFC3	chrI_147785_C_G_839	0.0818721	1.08884	0.616885	-0.0207751	0.00380218	0.00669773	FALSE
YAL002W	VPS8	chrI_147785_C_G_839	-0.0619674	1.18717	0.576055	-0.0409689	1.74456e-08	4.90673e-08	FALSE
YAL003W	EFB1	chrI_138257_G_A_789	0.0558189	24.6036	0	0.0599533	1.08417e-28	6.32577e-28	FALSE
YAL005C	SSA1	chrI_138257_G_A_789	-0.221345	47.4004	0	-0.400812	3.22548e-78	4.87917e-77	FALSE
YAL007C	ERP2	chrI_138257_G_A_789	0.0154334	2.17252	0.203614	0.0182313	0.0296582	0.045896	FALSE
YAL008W	FUN14	chrI_138257_G_A_789	0.0849669	4.06849	0.00970695	0.0791936	7.71331e-11	2.45162e-10	FALSE
YAL009W	SPO7	chrI_138257_G_A_789	-0.0273957	1.5401	0.419061	-0.0603267	1.08582e-15	4.25837e-15	FALSE
YAL010C	MDM10	chrI_134219_C_T_764	0.325292	6.44381	0.000403226	0.051145	1.98347e-09	5.86123e-09	FALSE
YAL011W	SWC3	chrI_134219_C_T_764	-0.00479179	0.350691	0.941275	-0.0518093	4.6971e-17	1.92392e-16	FALSE
YAL014C	SYN8	chrI_128302_T_C_732	0.00994501	0.657104	0.817538	-0.00439959	0.438235	0.516133	FALSE
YAL015C	NTG1	chrI_128302_T_C_732	-0.00716082	0.932755	0.688777	-0.0200337	0.00811469	0.0137075	FALSE
YAL016W	TPD3	chrI_128302_T_C_732	-0.0226899	1.29357	0.52723	-0.0101541	0.084234	0.120413	FALSE
YAL019W	FUN30	chrI_114824_C_T_720	-0.00021086	0.729918	0.78487	-0.0614925	3.71414e-15	1.42725e-14	FALSE
YAL020C	ATS1	chrI_114824_C_T_720	-0.00283656	2.94024	0.0749294	0.0223554	0.000126501	0.000264086	FALSE
YAL022C	FUN26	chrI_107538_G_A_708	0.0551247	0.918913	0.694532	-0.0338941	5.36129e-11	1.71838e-10	FALSE
YAL023C	PMT2	chrI_107538_G_A_708	-0.00883519	0.858355	0.728216	-0.00561753	0.479382	0.553759	FALSE
YAL024C	LTE1	chrI_107538_G_A_708	-0.0174567	1.20815	0.567958	0.0135007	0.0970016	0.137325	FALSE
YAL025C	MAK16	chrI_93789_T_A_703	0.00345368	0.629995	0.830456	0.00775539	0.487468	0.561964	FALSE
YAL026C	DRS2	chrI_93789_T_A_703	-0.029787	0.186094	0.987039	-0.019532	0.00757808	0.0128542	FALSE
YAL026C-A	YAL026C-A	chrI_93789_T_A_703	0.167779	1.20235	0.570719	-0.0305452	0.0293383	0.0454501	FALSE
YAL027W	SAW1	chrI_93789_T_A_703	0.0909184	0.800542	0.753663	0.0288893	0.0109992	0.0182088	FALSE
YAL028W	FRT2	chrI_93789_T_A_703	-0.0633798	1.6159	0.385541	-0.137182	1.0999e-14	4.16505e-14	FALSE
YAL029C	MYO4	chrI_93789_T_A_703	-0.00407298	1.7268	0.34325	0.0343452	9.08114e-08	2.43669e-07	FALSE
YAL030W	SNC1	chrI_83284_A_G_670	-0.036544	1.49951	0.434914	-0.0315151	9.44564e-05	0.00019989	FALSE
YAL031C	GIP4	chrI_83284_A_G_670	0.0720512	1.17258	0.579505	-0.00468659	0.575645	0.644011	FALSE
YAL032C	PRP45	chrI_83284_A_G_670	0.222088	8.50602	0	0.0864246	1.2205e-31	7.7029e-31	FALSE
YAL033W	POP5	chrI_83284_A_G_670	-0.294553	18.894	0	-0.15624	4.48747e-62	5.40197e-61	FALSE
YAL034C	FUN19	chrI_81262_G_A_665	-0.0790874	1.54646	0.416876	-0.0288715	0.0258384	0.0404446	FALSE
YAL034W-A	MTW1	chrI_81262_G_A_665	-0.0582961	0.579086	0.851724	-0.00683822	0.474495	0.549445	FALSE
YAL035W	FUN12	chrI_76456_G_A_660	-0.0228334	1.26399	0.540144	-0.0151724	0.0295192	0.0457056	FALSE
YAL036C	RBG1	chrI_76456_G_A_660	0.0438487	1.63723	0.378464	0.00495362	0.496854	0.571058	FALSE
YAL037C-B	YAL037C-B	chrI_71601_G_A_653	-0.068868	1.5351	0.421939	-0.0249332	0.252295	0.321798	FALSE
YAL038W	CDC19	chrI_71601_G_A_653	-0.0101732	2.36199	0.161183	-0.0222574	0.00321223	0.00571308	FALSE
YAL044C	GCV3	chrI_58073_G_A_584	-0.019825	2.77729	0.091128	0.0166584	0.0397092	0.0601476	FALSE
YAL044W-A	BOL1	chrI_58073_G_A_584	-0.0192249	1.79799	0.315332	0.0103318	0.156726	0.212361	FALSE
YAL047C	SPC72	chrI_54806_T_C_560	0.112415	2.04057	0.234076	-0.0306191	4.10101e-06	9.75845e-06	FALSE
YAL048C	GEM1	chrI_54806_T_C_560	-0.311273	1.77523	0.323838	0.0120699	0.216674	0.281962	FALSE
YAL049C	AIM2	chrI_54806_T_C_560	0.522163	153.326	0	0.495397	7.30074e-296	8.34913e-294	FALSE
YAL051W	OAF1	chrI_48115_G_C_499	0.112147	2.19235	0.197762	-0.00766457	0.287399	0.360275	FALSE
YAL053W	FLC2	chrI_48115_G_C_499	-0.0371701	1.3345	0.510179	-0.021062	0.0101832	0.0169413	FALSE
YAL054C	ACS1	chrI_42527_T_C_459	-0.0684103	1.66003	0.369561	-0.162508	3.77633e-38	2.80794e-37	FALSE
YAL055W	PEX22	chrI_42527_T_C_459	-0.134918	4.25936	0.00741266	-0.105408	8.2163e-21	3.83517e-20	FALSE
YAR002C-A	ERP1	chrI_155562_T_G_887	0.00491796	0.918481	0.694758	-0.0598646	1.60358e-14	6.0166e-14	FALSE
YAR002W	NUP60	chrI_155562_T_G_887	-0.051827	1.28516	0.530333	-0.0505933	1.11417e-18	4.83003e-18	FALSE
YAR003W	SWD1	chrI_155562_T_G_887	-0.0710825	1.01912	0.648814	0.0385715	2.74367e-09	8.04942e-09	FALSE
YAR007C	RFA1	chrI_155562_T_G_887	-0.0290698	0.890716	0.711086	0.0138886	0.0165761	0.0267293	FALSE
YAR008W	SEN34	chrI_155562_T_G_887	-0.037214	0.495691	0.888098	0.0567626	6.60535e-11	2.10767e-10	FALSE
YAR014C	BUD14	chrI_155562_T_G_887	-0.057286	0.952583	0.678761	0.00648093	0.224468	0.29065	FALSE
YAR015W	ADE1	chrI_155562_T_G_887	0.0120682	0.933062	0.688626	-0.0735379	4.23437e-20	1.92772e-19	FALSE
YAR018C	KIN3	chrI_155562_T_G_887	0.0107493	0.777256	0.765873	0.0598348	1.23059e-15	4.80635e-15	FALSE
YAR019C	CDC15	chrI_155562_T_G_887	0.0161345	1.6859	0.358748	0.0613352	1.53029e-12	5.25538e-12	FALSE
YAR023C	YAR023C	chrI_155562_T_G_887	0.045627	1.87673	0.287958	0.278268	8.88274e-80	1.38397e-78	FALSE
YAR027W	UIP3	chrI_155562_T_G_887	-0.0104598	0.716635	0.791833	-0.826949	1.25462e-289	1.30435e-287	FALSE
YAR028W	YAR028W	chrI_155562_T_G_887	-0.00643386	1.19706	0.572958	-1.26224	2.24761e-304	2.73443e-302	FALSE
YAR029W	YAR029W	chrI_155562_T_G_887	0.0479119	1.11092	0.607018	-0.396128	1.01563e-25	5.5046e-25	FALSE
YAR031W	PRM9	chrI_155562_T_G_887	-0.312747	1.99568	0.246902				FALSE
YAR033W	MST28	chrI_155562_T_G_887	-0.0553109	0.777548	0.76574	-1.75654	2.09707e-291	2.26246e-289	FALSE
YAR035W	YAT1	chrI_155562_T_G_887	0.0226943	0.451037	0.906443	-0.059417	5.25207e-06	1.24199e-05	FALSE
YAR042W	SWH1	chrI_228756_A_G_1542	0.042161	0.660115	0.815929	0.0305233	0.000215247	0.000439143	FALSE
YAR050W	FLO1	chrI_228756_A_G_1542	0.0115115	0.902851	0.703136	-0.601756	3.70054e-84	6.13324e-83	FALSE
YAR071W	PHO11	chrI_228756_A_G_1542	0.165022	2.31198	0.171163	-1.61192	2.71759e-228	1.74597e-226	FALSE
YBL001C	ECM15	chrII_236383_G_A_2556	0.00239239	1.18805	0.575931	-0.00693429	0.348207	0.425074	FALSE
YBL002W	HTB2	chrII_236383_G_A_2556	0.00427876	2.04436	0.233871	0.00962568	0.384874	0.46198	FALSE
YBL003C	HTA2	chrII_236383_G_A_2556	0.00452343	1.02255	0.647453	-0.0144667	0.192306	0.254009	FALSE
YBL004W	UTP20	chrII_236383_G_A_2556	-0.0538403	1.14634	0.590223	-0.0115749	0.345807	0.422776	FALSE
YBL007C	SLA1	chrII_212886_C_G_2461	-0.076708	3.50371	0.0272537	-0.0876444	1.2488e-24	6.53906e-24	FALSE
YBL008W	HIR1	chrII_212886_C_G_2461	0.00400688	0.301647	0.956751	-0.0256001	7.27728e-05	0.000155093	FALSE
YBL009W	ALK2	chrII_205343_A_C_2414	0.00319843	1.10214	0.610806	0.00331259	0.656991	0.719807	FALSE
YBL010C	YBL010C	chrII_205343_A_C_2414	0.102701	1.40339	0.479926	0.0251327	0.00132922	0.00248382	FALSE
YBL011W	SCT1	chrII_205343_A_C_2414	-0.0223768	0.390057	0.928341	-0.107092	1.08516e-45	9.27499e-45	FALSE
YBL014C	RRN6	chrII_205343_A_C_2414	0.0146449	2.65226	0.106946	-0.0374293	7.59006e-08	2.05007e-07	FALSE
YBL015W	ACH1	chrII_193380_A_G_2309	-0.213224	3.03366	0.0638379	-0.313967	1.47704e-61	1.75586e-60	FALSE
YBL016W	FUS3	chrII_193380_A_G_2309	0.291724	16.131	0	0.228095	1.0109e-45	8.67917e-45	FALSE
YBL017C	PEP1	chrII_186067_A_G_2237	-0.00252627	0.735768	0.781768	0.0734841	7.417e-22	3.58196e-21	FALSE
YBL018C	POP8	chrII_186067_A_G_2237	-0.314808	34.4	0	-0.139862	8.0315e-46	6.92671e-45	FALSE
YBL030C	PET9	chrII_162773_T_C_2057	0.0915172	12.1357	0	-0.0994768	4.26362e-15	1.6351e-14	FALSE
YBL031W	SHE1	chrII_162773_T_C_2057	0.168457	3.77001	0.0181814	-0.013632	0.135555	0.186144	FALSE
YBL036C	YBL036C	chrII_150394_G_A_1992	-0.186369	17.2703	0	0.109107	1.97747e-69	2.62957e-68	FALSE
YBL037W	APL3	chrII_150394_G_A_1992	-0.298209	8.72919	0	0.0183705	0.00577973	0.00996037	FALSE
YBL040C	ERD2	chrII_142364_A_G_1943	-0.0414425	2.36767	0.160406	-0.103466	2.20873e-32	1.41586e-31	FALSE
YBL041W	PRE7	chrII_142364_A_G_1943	0.0994707	14.9428	0	0.14185	1.1013e-138	3.36751e-137	FALSE
YBL042C	FUI1	chrII_138318_A_G_1913	0.00701371	0.947989	0.6809	-0.0556344	0.00148434	0.00275656	FALSE
YBL043W	ECM13	chrII_138318_A_G_1913	0.405816	4.16697	0.00776197	0.175479	2.63931e-09	7.75787e-09	FALSE
YBL044W	YBL044W	chrII_135183_A_C_1890	0.421543	3.11524	0.0542778	0.962413	6.02352e-155	2.13929e-153	FALSE
YBL045C	COR1	chrII_135183_A_C_1890	0.0874286	2.91825	0.075775	0.0185845	0.180435	0.239937	FALSE
YBL046W	PSY4	chrII_133612_A_G_1883	0.607482	26.9866	0	0.0130531	0.0515253	0.0766844	FALSE
YBL047C	EDE1	chrII_133612_A_G_1883	-0.0688172	1.40397	0.479704	0.0531938	7.51746e-08	2.03142e-07	FALSE
YBL048W	RRT1	chrII_126130_C_T_1836	0.0223965	1.29875	0.524634	0.0418844	0.264874	0.335449	FALSE
YBL049W	MOH1	chrII_126130_C_T_1836	-0.0953616	0.557582	0.862036	0.109747	0.000130087	0.000271177	FALSE
YBL050W	SEC17	chrII_126130_C_T_1836	-0.0449405	2.74633	0.0939149	-0.0154159	0.0333959	0.0511951	FALSE
YBL051C	PIN4	chrII_126130_C_T_1836	-0.0142962	0.583078	0.850423	0.0350924	9.51572e-05	0.000201224	FALSE
YBL052C	SAS3	chrII_115270_T_C_1758	0.0565003	1.18299	0.576642	0.0320756	3.15627e-06	7.57346e-06	FALSE
YBL054W	TOD6	chrII_115270_T_C_1758	0.0675197	1.32453	0.513669	0.00925206	0.500795	0.574548	FALSE
YBL055C	YBL055C	chrII_115270_T_C_1758	0.160541	2.29414	0.174647	-0.0146253	0.0701368	0.101736	FALSE
YBL056W	PTC3	chrII_115270_T_C_1758	-0.122731	11.2909	0	0.00198507	0.713953	0.767221	FALSE
YBL057C	PTH2	chrII_115270_T_C_1758	-0.000835433	0.453145	0.905698	0.0073355	0.216083	0.281385	FALSE
YBL058W	SHP1	chrII_115270_T_C_1758	-0.0138675	0.698665	0.800308	0.000799871	0.899221	0.92113	FALSE
YBL059C-A	CMC2	chrII_115270_T_C_1758	0.00500941	0.129501	0.993895	0.0180989	0.0681215	0.0991803	FALSE
YBL059W	YBL059W	chrII_115270_T_C_1758	-0.00290665	0.267222	0.96653	0.0145465	0.120478	0.167046	FALSE
YBL060W	YEL1	chrII_115270_T_C_1758	-0.0530647	0.552546	0.864894	0.00750507	0.206142	0.270596	FALSE
YBL061C	SKT5	chrII_102053_T_C_1749	-0.00456316	0.566174	0.857221	-0.0026261	0.681916	0.74101	FALSE
YBL063W	KIP1	chrII_102053_T_C_1749	-0.0272118	1.62426	0.382417	0.000960819	0.90656	0.925993	FALSE
YBL064C	PRX1	chrII_102053_T_C_1749	-0.00318966	0.79068	0.758194	0.00146064	0.927862	0.943203	FALSE
YBL066C	SEF1	chrII_102053_T_C_1749	0.0826849	0.988604	0.662646	-0.0151981	0.151727	0.206516	FALSE
YBL067C	UBP13	chrII_93811_T_C_1746	0.0552519	0.801957	0.753186	-0.00642975	0.327361	0.40359	FALSE
YBL068W	PRS4	chrII_93811_T_C_1746	0.0171271	0.272761	0.965317	0.00941853	0.146889	0.200792	FALSE
YBL069W	AST1	chrII_93811_T_C_1746	0.128599	0.290383	0.960899	0.00996706	0.179787	0.239296	FALSE
YBL071W-A	KTI11	chrII_87391_A_C_1743	-0.0405352	2.0234	0.239837	0.00868972	0.439093	0.517037	FALSE
YBL072C	RPS8A	chrII_87391_A_C_1743	0.00263139	1.19647	0.573184	-0.00481383	0.473265	0.548243	FALSE
YBL074C	AAR2	chrII_87391_A_C_1743	0.0439655	0.991195	0.66193	-0.0104522	0.313229	0.388175	FALSE
YBL075C	SSA3	chrII_87391_A_C_1743	0.056774	1.25599	0.544622	-0.0242725	0.0972785	0.137634	FALSE
YBL076C	ILS1	chrII_87391_A_C_1743	0.0346216	2.58379	0.119169	0.0079763	0.235285	0.302805	FALSE
YBL078C	ATG8	chrII_87391_A_C_1743	0.0479117	1.8762	0.288169	-0.0128503	0.417991	0.495558	FALSE
YBL079W	NUP170	chrII_72663_T_C_1707	-0.0624985	2.0759	0.226486	-0.0388781	3.75947e-08	1.03399e-07	FALSE
YBL080C	PET112	chrII_72663_T_C_1707	-0.096348	0.723103	0.788381	-0.0461766	2.19763e-05	4.91823e-05	FALSE
YBL081W	YBL081W	chrII_72663_T_C_1707	-0.123224	2.00668	0.244619	-0.1061	2.39053e-20	1.09703e-19	FALSE
YBL085W	BOI1	chrII_63857_T_C_1698	0.039147	1.09538	0.613808	0.0206848	0.00339357	0.00601501	FALSE
YBL086C	YBL086C	chrII_63857_T_C_1698	0.232614	3.21832	0.0463502	0.143286	2.26473e-24	1.17405e-23	FALSE
YBL087C	RPL23A	chrII_63857_T_C_1698	0.00188912	0.933581	0.688372	0.000839985	0.917246	0.933906	FALSE
YBL088C	TEL1	chrII_49603_A_G_1688	-0.0528268	0.356419	0.940082	-0.0120915	0.167106	0.22451	FALSE
YBL089W	AVT5	chrII_49603_A_G_1688	-0.296646	12.2752	0	-0.164623	2.5331e-89	4.51224e-88	FALSE
YBL090W	MRP21	chrII_49603_A_G_1688	0.0363723	1.84564	0.300066	-0.00860216	0.414317	0.491915	FALSE
YBL091C	MAP2	chrII_47104_G_T_1687	0.0211622	0.589494	0.848415	-0.00132162	0.815478	0.851361	FALSE
YBL091C-A	SCS22	chrII_47104_G_T_1687	-0.00227242	0.508582	0.882388	-0.0452646	3.78531e-05	8.28019e-05	FALSE
YBL092W	RPL32	chrII_47104_G_T_1687	-0.000469248	0.197525	0.984817	0.00271873	0.686247	0.744584	FALSE
YBL093C	ROX3	chrII_47104_G_T_1687	0.00158157	0.503621	0.884603	-0.00715841	0.435158	0.512932	FALSE
YBL095W	MRX3	chrII_47104_G_T_1687	-0.00475163	0.728764	0.785464	-0.0257527	0.0222749	0.0351845	FALSE
YBL096C	YBL096C	chrII_47104_G_T_1687	-0.0230704	1.18073	0.576958				FALSE
YBL097W	BRN1	chrII_38273_C_T_1677	0.144947	2.41849	0.149955	0.0199845	0.0384782	0.0584222	FALSE
YBL098W	BNA4	chrII_38273_C_T_1677	0.203008	1.74753	0.335369	-0.0669553	3.56847e-06	8.50189e-06	FALSE
YBL099W	ATP1	chrII_38273_C_T_1677	0.0861741	7.26363	0.000403226	0.113528	1.29462e-19	5.80597e-19	FALSE
YBL101C	ECM21	chrII_35660_T_C_1656	-0.0546909	1.02282	0.647364	-0.0411066	0.000341528	0.000684733	FALSE
YBL102W	SFT2	chrII_35660_T_C_1656	-0.025919	1.60076	0.392	-0.0712828	1.09163e-35	7.65879e-35	FALSE
YBL103C	RTG3	chrII_12133_T_C_1623	-0.0629097	1.41994	0.473197	-0.0140582	0.0598814	0.0879307	FALSE
YBL104C	SEA4	chrII_12133_T_C_1623	0.0295119	0.146632	0.992189	-0.0164215	0.00410122	0.0071957	FALSE
YBL105C	PKC1	chrII_12133_T_C_1623	0.0634319	1.07912	0.62204	0.0301108	2.59559e-06	6.27286e-06	FALSE
YBL106C	SRO77	chrII_12133_T_C_1623	0.0589365	1.68574	0.358832	-0.0564366	2.07396e-06	5.05926e-06	FALSE
YBL107C	MIX23	chrII_12133_T_C_1623	-0.161169	8.12674	0	-0.00499564	0.620642	0.686295	FALSE
YBL108C-A	PAU9	chrII_7481_T_C_1575	-0.388735	3.67047	0.0207675	-0.110975	0.0250471	0.0392919	FALSE
YBL113C	YBL113C	chrII_7481_T_C_1575	-1.50112	37.3784	0	-1.28542	2.23031e-212	1.26267e-210	FALSE
YBR001C	NTH2	chrII_236383_G_A_2556	-0.126429	3.62528	0.0231658	-0.187975	1.91263e-36	1.36705e-35	FALSE
YBR002C	RER2	chrII_244215_A_G_2614	0.0570484	1.64368	0.376467	0.0182987	0.0282243	0.0438432	FALSE
YBR003W	COQ1	chrII_244215_A_G_2614	-0.052	0.655407	0.818451	-0.0727145	6.81165e-13	2.37349e-12	FALSE
YBR004C	GPI18	chrII_244215_A_G_2614	-0.031154	2.04367	0.233908	-0.0240867	0.00653576	0.0111891	FALSE
YBR013C	YBR013C	chrII_266622_T_C_2748	-0.902758	77.8649	0	-0.641626	9.55739e-197	4.63128e-195	FALSE
YBR014C	GRX7	chrII_266622_T_C_2748	0.0315111	2.11315	0.217246	-0.105555	1.08559e-39	8.26549e-39	FALSE
YBR015C	MNN2	chrII_269396_C_T_2756	0.0200026	1.18665	0.576128	0.0155723	0.003182	0.00566282	FALSE
YBR016W	YBR016W	chrII_269396_C_T_2756	-0.00678143	0.645759	0.823025	-0.0176487	0.133001	0.182812	FALSE
YBR017C	KAP104	chrII_274614_C_T_2763	0.00988596	0.641966	0.824514	0.00349043	0.533495	0.606057	FALSE
YBR019C	GAL10	chrII_274614_C_T_2763	0.192583	1.73961	0.338951				FALSE
YBR020W	GAL1	chrII_283431_A_C_2770	-0.0917133	2.51689	0.13198	-0.0333808	0.0046732	0.00814925	FALSE
YBR021W	FUR4	chrII_283431_A_C_2770	-0.124491	2.22916	0.189295	-0.114032	6.73932e-27	3.75955e-26	FALSE
YBR022W	POA1	chrII_283431_A_C_2770	-0.083725	1.42729	0.469317	-0.0867062	2.27299e-19	1.01144e-18	FALSE
YBR024W	SCO2	chrII_291464_G_A_2776	0.0373182	1.09215	0.61528	-0.0240596	0.0258982	0.040516	FALSE
YBR025C	OLA1	chrII_291464_G_A_2776	-0.0435087	3.09991	0.0562299	0.00438454	0.414484	0.492011	FALSE
YBR026C	ETR1	chrII_292835_C_T_2778	-0.563273	88.7913	0	-0.28505	5.85342e-75	8.53823e-74	FALSE
YBR028C	YPK3	chrII_292835_C_T_2778	0.0352463	0.812511	0.749059	0.0170022	0.033885	0.0518892	FALSE
YBR029C	CDS1	chrII_299759_C_T_2798	-0.0641117	2.96335	0.0735172	-0.0421154	9.85404e-13	3.41902e-12	FALSE
YBR030W	RKM3	chrII_299759_C_T_2798	-0.154704	5.38262	0.000653595	-0.015412	0.0110452	0.0182797	FALSE
YBR031W	RPL4A	chrII_300849_C_T_2801	0.0743232	32.9279	0	-0.245423	2.61083e-168	1.05132e-166	FALSE
YBR033W	EDS1	chrII_300849_C_T_2801	0.158625	1.57894	0.40204	-0.035217	0.0270873	0.0422606	FALSE
YBR034C	HMT1	chrII_308097_A_G_2822	-0.0256239	0.393777	0.927721	0.00108219	0.911491	0.929536	FALSE
YBR035C	PDX3	chrII_308097_A_G_2822	-0.00982514	0.33707	0.944355	0.00386961	0.460747	0.536678	FALSE
YBR037C	SCO1	chrII_312659_G_A_2829	0.0192138	1.52293	0.428666	0.00116806	0.931599	0.945992	FALSE
YBR038W	CHS2	chrII_312659_G_A_2829	-0.0419824	0.485935	0.892088	0.0171466	0.0530789	0.0787712	FALSE
YBR039W	ATP3	chrII_312659_G_A_2829	0.101104	7.22651	0.000403226	0.0460427	4.80648e-07	1.22639e-06	FALSE
YBR041W	FAT1	chrII_320415_T_A_2838	0.0740794	1.92185	0.27334	0.0352615	1.38181e-07	3.65626e-07	FALSE
YBR042C	CST26	chrII_320415_T_A_2838	0.0112895	1.34449	0.505805	-0.0598495	4.6579e-22	2.26286e-21	FALSE
YBR043C	QDR3	chrII_320415_T_A_2838	0.000916177	0.224205	0.978396	-0.0677295	1.61621e-29	9.73815e-29	FALSE
YBR044C	TCM62	chrII_328908_A_G_2920	0.116123	1.99182	0.248138	0.0358524	0.000207418	0.000424488	FALSE
YBR045C	GIP1	chrII_328908_A_G_2920	1.3717	52.8538	0	0.443761	2.64043e-97	5.13537e-96	FALSE
YBR048W	RPS11B	chrII_332654_T_C_2945	0.0105586	1.82409	0.306314	0.0300529	1.20147e-06	2.96632e-06	FALSE
YBR049C	REB1	chrII_332654_T_C_2945	0.00217771	0.128548	0.993989	0.0246863	0.000538567	0.00105319	FALSE
YBR050C	REG2	chrII_332654_T_C_2945	0.248266	1.73794	0.339516	0.146716	5.09618e-10	1.55082e-09	FALSE
YBR052C	RFS1	chrII_332654_T_C_2945	0.0100611	0.630309	0.830295	0.00254001	0.800451	0.839659	FALSE
YBR053C	YBR053C	chrII_332654_T_C_2945	-0.00238858	0.571931	0.854372	0.108845	1.49592e-15	5.8228e-15	FALSE
YBR054W	YRO2	chrII_351335_G_A_3058	0.0850577	1.29013	0.528955	0.104869	0.000559008	0.0010913	FALSE
YBR055C	PRP6	chrII_351335_G_A_3058	0.000393526	0.176076	0.98902	-0.055285	2.98907e-23	1.49663e-22	FALSE
YBR056W	YBR056W	chrII_351335_G_A_3058	-0.0733872	2.47923	0.138821	-0.0427038	0.00167956	0.00310097	FALSE
YBR056W-A	YBR056W-A	chrII_351335_G_A_3058	0.125749	2.04937	0.2336	-0.0520352	0.0203327	0.0322951	FALSE
YBR058C	UBP14	chrII_355836_A_G_3077	0.959678	48.1483	0	0.0550548	3.57545e-24	1.84517e-23	FALSE
YBR058C-A	TSC3	chrII_355836_A_G_3077	-0.00365873	0.599162	0.844524	0.00574005	0.50776	0.581372	FALSE
YBR059C	AKL1	chrII_355836_A_G_3077	0.0279257	0.703385	0.798278	0.0284243	0.00496831	0.00864015	FALSE
YBR060C	ORC2	chrII_364725_G_A_3135	0.117953	2.1514	0.207041	0.152664	4.47384e-118	1.11709e-116	FALSE
YBR061C	TRM7	chrII_364725_G_A_3135	0.0142921	1.47213	0.448099	0.0936927	1.15641e-39	8.79305e-39	FALSE
YBR063C	YBR063C	chrII_370007_T_G_3178	0.0433446	1.68238	0.360564	-0.138816	2.96141e-64	3.68918e-63	FALSE
YBR065C	ECM2	chrII_370007_T_G_3178	-0.430698	4.47321	0.00497925	-0.165851	1.09839e-55	1.16308e-54	FALSE
YBR066C	NRG2	chrII_370007_T_G_3178	-0.386493	94.5279	0	-0.829728	1.02418e-215	6.10026e-214	TRUE
YBR081C	SPT7	chrII_406787_T_G_3426	-0.101813	6.55483	0.000403226	-0.014648	0.0195488	0.0311452	TRUE
YBR082C	UBC4	chrII_406787_T_G_3426	0.0436108	3.35625	0.0369385	0.020582	0.0035347	0.00625161	FALSE
YBR083W	TEC1	chrII_412233_A_C_3464	0.503756	38.8094	0	0.396507	4.1585e-76	6.11267e-75	FALSE
YBR084C-A	RPL19A	chrII_412233_A_C_3464	0.00537674	0.652691	0.819913	0.0118494	0.0403412	0.0610241	FALSE
YBR084W	MIS1	chrII_412233_A_C_3464	0.0560606	1.32372	0.513975	-0.0200309	0.0305438	0.0471616	FALSE
YBR085C-A	YBR085C-A	chrII_422634_G_A_3567	-0.0327938	3.47873	0.0296434	-0.0436522	0.00522022	0.00906169	FALSE
YBR085W	AAC3	chrII_412233_A_C_3464	0.159631	3.39011	0.034124	0.118731	0.000235616	0.000478938	FALSE
YBR086C	IST2	chrII_422634_G_A_3567	-0.0345701	1.49154	0.437854	0.00355718	0.659946	0.7218	FALSE
YBR087W	RFC5	chrII_422634_G_A_3567	0.0272997	2.43188	0.14708	-0.0695675	1.41615e-30	8.71643e-30	FALSE
YBR088C	POL30	chrII_426865_C_T_3594	-0.0283082	1.2185	0.562815	-0.0366181	6.32782e-06	1.48654e-05	FALSE
YBR089C-A	NHP6B	chrII_426865_C_T_3594	0.010933	1.31853	0.51603	-0.00178457	0.812919	0.849464	FALSE
YBR091C	TIM12	chrII_426865_C_T_3594	-0.129137	5.52245	0.000653595	-0.000792016	0.935233	0.948943	FALSE
YBR092C	PHO3	chrII_426865_C_T_3594	-0.864518	30.7514	0	-0.0681153	3.645e-05	8.0008e-05	FALSE
YBR093C	PHO5	chrII_430846_C_A_3633	0.225258	5.53822	0.000653595	0.183194	1.12325e-13	4.07534e-13	FALSE
YBR094W	PBY1	chrII_430846_C_A_3633	-0.208202	5.04788	0.0017991	-0.108487	5.96477e-53	5.99413e-52	FALSE
YBR095C	RXT2	chrII_436119_T_C_3665	0.0376857	2.07023	0.228385	0.0213302	0.00089376	0.001702	FALSE
YBR096W	YBR096W	chrII_436119_T_C_3665	-0.0474519	2.09239	0.222744	0.0294045	4.57172e-05	9.95094e-05	FALSE
YBR097W	VPS15	chrII_436119_T_C_3665	-0.0381667	0.472921	0.897732	-0.000388825	0.966088	0.97358	FALSE
YBR098W	MMS4	chrII_442819_G_A_3695	0.144059	0.714426	0.793051	0.0551974	7.41922e-11	2.35946e-10	FALSE
YBR099C	YBR099C	chrII_442819_G_A_3695	0.105945	1.03709	0.641566	0.0164833	0.571311	0.640039	FALSE
YBR101C	FES1	chrII_442819_G_A_3695	0.0264792	0.377073	0.9331	0.00122362	0.861777	0.890226	FALSE
YBR102C	EXO84	chrII_449253_C_T_3711	-0.0306017	1.22067	0.561615	-0.00286813	0.615704	0.681625	FALSE
YBR103W	SIF2	chrII_449253_C_T_3711	0.24585	17.678	0	0.107806	9.91848e-78	1.48427e-76	FALSE
YBR104W	YMC2	chrII_450377_T_C_3716	0.0929868	3.86087	0.0151114	0.0480295	1.17713e-05	2.69989e-05	FALSE
YBR105C	VID24	chrII_450377_T_C_3716	-0.181613	12.6863	0	-0.296314	1.47625e-59	1.71221e-58	FALSE
YBR107C	IML3	chrII_454587_A_G_3758	1.35737	24.5401	0	0.292104	2.62495e-153	9.09664e-152	FALSE
YBR108W	AIM3	chrII_454587_A_G_3758	0.0074319	0.850295	0.731915	0.00838357	0.461882	0.537781	FALSE
YBR109C	CMD1	chrII_459672_T_C_3810	-0.0398195	7.65569	0	-6.8021e-05	0.989804	0.992084	FALSE
YBR109W-A	YBR109W-A	chrII_459672_T_C_3810	0.25293	0.650317	0.82119	-0.133621	3.12072e-11	1.00986e-10	FALSE
YBR110W	ALG1	chrII_459672_T_C_3810	0.0017201	2.53086	0.12872	0.0323386	6.67748e-07	1.68054e-06	FALSE
YBR118W	TEF2	chrII_480340_G_A_3967	-0.0466855	50.384	0	-3.9845	0	0	FALSE
YBR119W	MUD1	chrII_480340_G_A_3967	0.0719826	1.99467	0.247224	-0.112637	1.68833e-47	1.50372e-46	FALSE
YBR120C	CBP6	chrII_480340_G_A_3967	0.10805	2.37062	0.159977	0.0478	0.000321	0.000645387	FALSE
YBR126W-A	MEO1	chrII_491265_C_T_4024	-0.0528296	1.37269	0.493978	-0.0752065	6.9687e-17	2.84216e-16	FALSE
YBR126W-B	YBR126W-B	chrII_491265_C_T_4024	0.0146127	1.28789	0.529591	-0.0663476	1.05504e-13	3.83029e-13	FALSE
YBR127C	VMA2	chrII_491265_C_T_4024	0.0156276	0.464249	0.901522	0.0459942	1.68473e-15	6.54881e-15	FALSE
YBR129C	OPY1	chrII_495627_C_T_4028	-0.0215125	1.01615	0.650558	-0.0104599	0.230557	0.297389	FALSE
YBR130C	SHE3	chrII_495627_C_T_4028	0.045366	2.15586	0.206835	-0.000191327	0.974185	0.979323	FALSE
YBR131W	CCZ1	chrII_495627_C_T_4028	0.0141656	2.5687	0.12171	0.0263291	0.000177904	0.000366579	FALSE
YBR132C	AGP2	chrII_502627_A_G_4083	0.0118658	0.923042	0.692795	-0.0321572	0.153411	0.208312	FALSE
YBR133C	HSL7	chrII_502627_A_G_4083	-0.0601928	2.06403	0.229891	0.0176639	0.0104721	0.0174069	FALSE
YBR142W	MAK5	chrII_530672_C_T_4287	0.132305	3.84169	0.0154851	-0.0058001	0.562736	0.632338	FALSE
YBR143C	SUP45	chrII_530672_C_T_4287	-0.043727	2.88137	0.0788278	-0.0134013	0.0087509	0.014717	FALSE
YBR156C	SLI15	chrII_550847_A_C_4490	-0.0931726	3.93779	0.012059	-0.0110032	0.173179	0.231797	FALSE
YBR157C	ICS2	chrII_550847_A_C_4490	-0.504984	21.9827	0	0.0384767	0.129258	0.178095	FALSE
YBR158W	AMN1	chrII_559732_T_C_4551	0.0292488	0.176321	0.988981	0.163553	7.44513e-59	8.54844e-58	FALSE
YBR159W	IFA38	chrII_559732_T_C_4551	-0.360443	43.4383	0	0.0150769	0.00867941	0.0146096	FALSE
YBR165W	UBS1	chrII_569856_T_G_4621	0.0667101	1.12022	0.602025	0.0856608	9.49128e-28	5.38939e-27	FALSE
YBR166C	TYR1	chrII_569856_T_G_4621	-0.132997	2.86694	0.0804915	-0.135318	1.74323e-98	3.44907e-97	FALSE
YBR170C	NPL4	chrII_579042_A_G_4686	0.125533	5.63442	0.000403226	0.0925564	2.81469e-43	2.30579e-42	FALSE
YBR171W	SEC66	chrII_579042_A_G_4686	0.0529313	3.4488	0.0307856	0.00925044	0.213584	0.278765	FALSE
YBR172C	SMY2	chrII_579042_A_G_4686	0.0337358	1.09949	0.611933	0.00389933	0.554852	0.626015	FALSE
YBR176W	ECM31	chrII_584634_C_T_4740	0.0544543	2.20795	0.193693	0.0176375	0.00886349	0.01488	FALSE
YBR177C	EHT1	chrII_584634_C_T_4740	-0.221973	34.9167	0	-0.126368	4.13601e-25	2.19793e-24	FALSE
YBR179C	FZO1	chrII_585569_C_T_4744	0.170541	4.65566	0.0039886	-0.0235781	0.00198937	0.0036424	FALSE
YBR181C	RPS6B	chrII_585569_C_T_4744	0.0508987	24.5253	0	0.0718927	5.73367e-06	1.35252e-05	FALSE
YBR183W	YPC1	chrII_602542_A_G_4866	-0.478256	20.5515	0	-0.344269	7.63776e-40	5.84641e-39	FALSE
YBR184W	YBR184W	chrII_602542_A_G_4866	-0.14409	1.50614	0.433173	-0.0441088	0.00174571	0.00321894	FALSE
YBR185C	MBA1	chrII_602542_A_G_4866	0.0308459	0.810722	0.750065	0.0529163	2.00217e-07	5.22997e-07	FALSE
YBR187W	GDT1	chrII_602542_A_G_4866	0.0157678	0.386844	0.929442	0.0440313	2.7263e-08	7.56747e-08	FALSE
YBR188C	NTC20	chrII_605039_G_A_4885	0.068015	1.19329	0.574399	0.08727	1.24016e-18	5.364e-18	FALSE
YBR189W	RPS9B	chrII_605039_G_A_4885	0.00771222	1.0529	0.635199	-0.0815637	1.10415e-27	6.25724e-27	FALSE
YBR191W	RPL21A	chrII_607602_C_T_4905	0.0184649	4.41311	0.00580258	-0.296023	4.07675e-212	2.28538e-210	FALSE
YBR191W-A	YBR191W-A	chrII_607602_C_T_4905	-0.146411	4.11338	0.00842912				FALSE
YBR196C	PGI1	chrII_614131_A_G_4944	-0.0372859	5.09484	0.00150376	5.80391e-05	0.993405	0.994586	FALSE
YBR196C-A	YBR196C-A	chrII_614131_A_G_4944	1.04689	18.0436	0	0.694399	1.92297e-46	1.67615e-45	FALSE
YBR197C	YBR197C	chrII_614131_A_G_4944	-1.54596	157.067	0	-0.826668	0	0	FALSE
YBR199W	KTR4	chrII_620443_G_T_5000	0.0590799	5.64386	0.000403226	0.0932616	9.00695e-38	6.64539e-37	FALSE
YBR200W	BEM1	chrII_620443_G_T_5000	-0.0775945	1.95727	0.25903	-0.0230649	0.000840192	0.00160301	FALSE
YBR201C-A	YBR201C-A	chrII_624009_C_T_5023	0.223019	1.33744	0.509252	0.125905	2.04671e-05	4.59124e-05	FALSE
YBR201W	DER1	chrII_624009_C_T_5023	-0.0984625	3.46607	0.0302059	-0.0397018	0.00781345	0.0132299	FALSE
YBR204C	LDH1	chrII_634599_G_A_5114	-0.147088	4.6785	0.0039886	-0.185258	1.08829e-54	1.12732e-53	FALSE
YBR205W	KTR3	chrII_634599_G_A_5114	-0.40435	9.25731	0	-0.0411321	2.31895e-18	9.96225e-18	FALSE
YBR206W	YBR206W	chrII_634599_G_A_5114	-0.350704	26.4851	0	-0.0184714	0.0198697	0.0316212	FALSE
YBR207W	FTH1	chrII_635478_C_T_5118	-0.0985421	12.7552	0	-0.0720774	5.30972e-12	1.77654e-11	FALSE
YBR208C	DUR1,2	chrII_635478_C_T_5118	0.0171941	1.1693	0.580662	0.00392349	0.790135	0.830819	FALSE
YBR210W	ERV15	chrII_648668_A_G_5218	0.782681	73.4478	0	0.0868557	3.92509e-22	1.91305e-21	FALSE
YBR211C	AME1	chrII_648668_A_G_5218	1.3942	76.0977	0	0.0389972	2.17625e-06	5.29974e-06	FALSE
YBR212W	NGR1	chrII_648668_A_G_5218	0.0145929	0.590476	0.848063	0.0609518	1.33319e-05	3.03833e-05	FALSE
YBR213W	MET8	chrII_651616_T_A_5236	0.0465287	3.68924	0.0199955	-0.0617542	1.97293e-06	4.81691e-06	FALSE
YBR214W	SDS24	chrII_651616_T_A_5236	-0.071302	3.05411	0.0616586	0.0868893	1.82362e-05	4.09884e-05	FALSE
YBR216C	YBP1	chrII_657722_C_T_5276	-0.0695332	0.872579	0.719134	-0.0179108	0.00873699	0.0147022	FALSE
YBR217W	ATG12	chrII_657722_C_T_5276	-0.0510136	0.581354	0.850962	-0.0292102	0.0033008	0.00585966	FALSE
YBR218C	PYC2	chrII_657722_C_T_5276	0.0918947	3.07281	0.0590048	0.00097481	0.913818	0.931742	FALSE
YBR221C	PDB1	chrII_665795_A_G_5307	-0.00656296	0.383928	0.93045	-0.00821368	0.0747016	0.107593	FALSE
YBR222C	PCS60	chrII_665795_A_G_5307	0.133221	4.60275	0.0039886	-0.0073809	0.465635	0.541269	FALSE
YBR223C	TDP1	chrII_665795_A_G_5307	0.120142	1.98581	0.249535	0.00388569	0.694661	0.751575	FALSE
YBR225W	YBR225W	chrII_676163_T_C_5363	-0.39324	3.77866	0.0178681	-0.011591	0.277278	0.348993	FALSE
YBR227C	MCX1	chrII_676163_T_C_5363	-0.0655112	1.8647	0.292779	-0.00165639	0.778592	0.821855	FALSE
YBR228W	SLX1	chrII_676163_T_C_5363	-0.0913518	2.27447	0.179835	-0.0343555	4.27965e-08	1.17311e-07	FALSE
YBR233W-A	DAD3	chrII_685662_T_C_5429	0.00739845	0.327613	0.947188	0.00259756	0.79749	0.837014	FALSE
YBR234C	ARC40	chrII_685662_T_C_5429	-0.00364898	0.58275	0.850525	0.069481	1.58029e-40	1.2211e-39	FALSE
YBR235W	VHC1	chrII_685662_T_C_5429	-0.306615	9.91832	0	-0.165897	3.70735e-114	9.0207e-113	FALSE
YBR236C	ABD1	chrII_694669_G_A_5493	0.0675151	2.24067	0.186696	0.029549	3.34052e-08	9.22758e-08	FALSE
YBR237W	PRP5	chrII_694669_G_A_5493	0.0204621	1.91309	0.275497	0.0513184	2.31321e-19	1.02853e-18	FALSE
YBR238C	YBR238C	chrII_694669_G_A_5493	0.0886353	1.04941	0.636601	-0.0441037	0.0120705	0.0198787	FALSE
YBR241C	YBR241C	chrII_705106_A_T_5532	-0.0325839	1.11235	0.60624	-0.00996203	0.529085	0.602052	FALSE
YBR242W	YBR242W	chrII_705106_A_T_5532	0.00464048	0.142314	0.992406	0.0122234	0.171119	0.22947	FALSE
YBR243C	ALG7	chrII_705106_A_T_5532	-0.030829	0.626626	0.831556	0.00187778	0.804891	0.843302	FALSE
YBR244W	GPX2	chrII_705106_A_T_5532	-0.0217717	0.211449	0.981131	-0.00633116	0.589424	0.656984	FALSE
YBR245C	ISW1	chrII_705106_A_T_5532	0.0447575	1.44793	0.459103	-0.00763592	0.255606	0.325369	FALSE
YBR246W	RRT2	chrII_716927_T_C_5543	0.0306057	0.612683	0.838323	-0.038321	1.81175e-16	7.29547e-16	FALSE
YBR247C	ENP1	chrII_716927_T_C_5543	-0.0335692	0.994082	0.66117	0.00392418	0.703422	0.75933	FALSE
YBR248C	HIS7	chrII_716927_T_C_5543	-0.0570956	3.19669	0.0481085	-0.00992583	0.109413	0.153308	FALSE
YBR249C	ARO4	chrII_716927_T_C_5543	-0.117812	17.1009	0	-0.136601	1.65282e-71	2.28281e-70	FALSE
YBR250W	SPO23	chrII_721088_C_T_5546	0.0460455	0.38317	0.930713	-0.00818203	0.64831	0.711933	FALSE
YBR251W	MRPS5	chrII_721088_C_T_5546	-0.0245466	1.14797	0.589531	0.00978388	0.239121	0.307205	FALSE
YBR252W	DUT1	chrII_721088_C_T_5546	-0.00902242	16.465	0	0.0117817	0.0567773	0.0838029	TRUE
YBR253W	SRB6	chrII_725168_A_G_5553	0.00461749	1.00467	0.657076	-0.0204741	0.00312022	0.00556154	FALSE
YBR254C	TRS20	chrII_725168_A_G_5553	-0.00104344	0.780715	0.764192	0.0168906	0.0112203	0.0185588	FALSE
YBR255C-A	RCF3	chrII_725168_A_G_5553	-0.00183038	1.03516	0.6425	-0.00224048	0.822989	0.858106	FALSE
YBR255W	MTC4	chrII_725168_A_G_5553	-0.0265451	0.142016	0.992421	-0.0223039	0.000737304	0.00141616	FALSE
YBR256C	RIB5	chrII_725168_A_G_5553	-0.00160586	0.981151	0.664783	0.0128967	0.13113	0.180544	FALSE
YBR257W	POP4	chrII_732123_C_T_5554	-0.00944626	0.831043	0.743849	0.000867881	0.910194	0.928709	FALSE
YBR258C	SHG1	chrII_732123_C_T_5554	0.0592917	1.31114	0.519277	0.00995544	0.403452	0.481013	FALSE
YBR259W	YBR259W	chrII_732123_C_T_5554	-0.105942	1.20456	0.569667	0.0141006	0.0542172	0.0802314	FALSE
YBR260C	RGD1	chrII_734775_G_A_5558	0.0621684	1.00061	0.65928	-0.0287688	5.77197e-06	1.36043e-05	FALSE
YBR261C	TAE1	chrII_734775_G_A_5558	0.0352183	2.21819	0.191337	0.0404345	4.82782e-12	1.61814e-11	FALSE
YBR262C	MIC12	chrII_734775_G_A_5558	-0.0291247	2.4687	0.14177	0.000471578	0.957316	0.967126	FALSE
YBR263W	SHM1	chrII_737571_T_A_5559	0.0112326	1.03852	0.640872	-0.00310733	0.636773	0.701284	FALSE
YBR264C	YPT10	chrII_737571_T_A_5559	-0.0252286	0.547392	0.867367	0.00617737	0.38383	0.461468	FALSE
YBR265W	TSC10	chrII_737571_T_A_5559	0.00471262	0.696287	0.801382	0.00825279	0.252754	0.322313	FALSE
YBR269C	SDH8	chrII_742721_C_G_5565	0.0113469	3.14626	0.0514979	-0.0357564	0.00152513	0.00283047	FALSE
YBR270C	BIT2	chrII_742721_C_G_5565	0.127865	1.38374	0.489211	0.0661628	6.49922e-18	2.73455e-17	FALSE
YBR271W	EFM2	chrII_746619_C_T_5586	-0.196759	6.46316	0.000403226	-0.120513	4.23007e-43	3.44062e-42	FALSE
YBR272C	HSM3	chrII_746619_C_T_5586	0.0784642	2.18384	0.200321	0.106286	2.23456e-37	1.6402e-36	FALSE
YBR273C	UBX7	chrII_749547_C_A_5598	-0.163369	6.83913	0.000403226	-0.028199	0.00145751	0.00271026	FALSE
YBR274W	CHK1	chrII_749547_C_A_5598	-0.102532	1.49691	0.435875	-0.0782078	4.45953e-30	2.71561e-29	FALSE
YBR275C	RIF1	chrII_749547_C_A_5598	0.337222	9.84449	0	-0.18774	2.31548e-98	4.5498e-97	FALSE
YBR276C	PPS1	chrII_760471_A_T_5673	-0.0205618	0.607718	0.840963	0.0188074	0.000435081	0.000860232	FALSE
YBR278W	DPB3	chrII_760471_A_T_5673	0.0131966	1.36354	0.497682	0.00536054	0.488869	0.563465	FALSE
YBR280C	SAF1	chrII_764689_T_C_5677	0.0209404	1.46427	0.451705	-0.0119583	0.452234	0.528701	FALSE
YBR281C	DUG2	chrII_764689_T_C_5677	-0.118614	3.77501	0.0180003	-0.0816315	7.06725e-37	5.11526e-36	FALSE
YBR282W	MRPL27	chrII_764689_T_C_5677	-0.030274	1.45076	0.457822	-0.0202633	0.0183871	0.0294338	FALSE
YBR283C	SSH1	chrII_764689_T_C_5677	0.066149	4.50288	0.00475524	0.069114	2.24007e-41	1.75703e-40	FALSE
YBR284W	YBR284W	chrII_775070_T_C_5716	0.23792	3.10191	0.0559862	0.048508	0.000419731	0.000831319	FALSE
YBR285W	YBR285W	chrII_775070_T_C_5716	0.302912	6.53469	0.000403226	0.186774	2.78556e-09	8.16392e-09	FALSE
YBR286W	APE3	chrII_775070_T_C_5716	-0.0524532	2.98021	0.0712465	-0.0407669	0.000547964	0.0010701	FALSE
YBR287W	YBR287W	chrII_775070_T_C_5716	0.0394612	1.38792	0.487158	0.00418746	0.597753	0.664584	FALSE
YBR288C	APM3	chrII_775070_T_C_5716	-0.065898	2.30862	0.171671	-0.0368669	1.19028e-14	4.49241e-14	FALSE
YBR289W	SNF5	chrII_775070_T_C_5716	0.0603626	0.600135	0.844126	-0.00870925	0.200465	0.26375	FALSE
YBR290W	BSD2	chrII_775070_T_C_5716	0.00620768	0.299564	0.957673	0.00819528	0.327784	0.404025	FALSE
YBR291C	CTP1	chrII_791790_C_A_5744	-0.0867419	6.25905	0.000403226	-0.1672	1.05864e-51	1.03122e-50	FALSE
YBR292C	YBR292C	chrII_791790_C_A_5744	-0.0286531	0.373232	0.934794				FALSE
YBR293W	VBA2	chrII_791790_C_A_5744	0.0801326	2.61308	0.114878	0.0132793	0.0200168	0.0318288	FALSE
YBR294W	SUL1	chrII_791790_C_A_5744	-0.0277709	1.91486	0.275087	-0.0421784	0.276657	0.348288	FALSE
YBR295W	PCA1	chrII_791790_C_A_5744	0.0179547	2.80947	0.0857097	-0.0107318	0.357212	0.433844	FALSE
YBR296C	PHO89	chrII_791790_C_A_5744	-0.460042	17.6134	0				FALSE
YBR297W	MAL33	chrII_809636_C_T_5770	0.152211	1.88318	0.285596	0.0784467	0.000775593	0.00148521	FALSE
YBR298C	MAL31	chrII_809636_C_T_5770	-0.0465601	0.310358	0.952724	0.0173893	0.527711	0.600646	FALSE
YBR299W	MAL32	chrII_809636_C_T_5770	0.242669	1.23967	0.55131	-0.0163939	0.602321	0.668233	FALSE
YBR301W	PAU24	chrII_809636_C_T_5770	-0.665784	5.17997	0.000653595				FALSE
YBR302C	COS2	chrII_809636_C_T_5770	-0.956301	27.3668	0	-0.175883	4.13738e-12	1.39244e-11	FALSE
YCL002C	YCL002C	chrIII_105047_G_A_6040	-0.0338721	0.516356	0.879555	0.0286792	0.000358691	0.00071613	FALSE
YCL005W	LDB16	chrIII_105047_G_A_6040	0.0726043	0.530575	0.874191	0.00971728	0.125917	0.173912	FALSE
YCL005W-A	VMA9	chrIII_105047_G_A_6040	-0.0481121	0.186603	0.986925	0.00683524	0.214025	0.279178	FALSE
YCL008C	STP22	chrIII_105047_G_A_6040	0.0375145	0.361447	0.938886	0.000200121	0.977993	0.982424	FALSE
YCL009C	ILV6	chrIII_105047_G_A_6040	0.00702321	7.19984	0.000403226	0.0812607	5.91096e-34	3.97634e-33	TRUE
YCL010C	SGF29	chrIII_105047_G_A_6040	-0.19849	7.33086	0.000403226	-0.00566831	0.574834	0.643229	TRUE
YCL011C	GBP2	chrIII_105047_G_A_6040	-0.0565577	1.88381	0.285385	-0.0225243	2.24172e-08	6.26192e-08	FALSE
YCL012C	YCL012C	chrIII_105047_G_A_6040	0.0642339	0.995449	0.660809	0.0752617	5.41316e-17	2.21247e-16	FALSE
YCL026C-A	FRM2	chrIII_74505_C_T_5906	1.01823	26.4089	0	0.654721	3.75846e-100	7.648e-99	FALSE
YCL026C-B	HBN1	chrIII_74505_C_T_5906	0.581839	239.646	0	0.694534	1.85576e-181	8.42161e-180	FALSE
YCL027W	FUS1	chrIII_74505_C_T_5906	0.0482135	1.15047	0.588491	0.131769	0.00625245	0.0107362	FALSE
YCL031C	RRP7	chrIII_63611_T_C_5887	-0.000937167	1.49067	0.438173	-0.00481913	0.452685	0.529119	FALSE
YCL032W	STE50	chrIII_63611_T_C_5887	-0.0382629	0.344822	0.942471	0.028917	0.00111774	0.00210861	FALSE
YCL033C	MXR2	chrIII_63611_T_C_5887	-0.112481	4.22275	0.00763158	-0.00670005	0.434617	0.512636	FALSE
YCL034W	LSB5	chrIII_63611_T_C_5887	-0.2996	17.1141	0	0.00668185	0.39931	0.476671	FALSE
YCL035C	GRX1	chrIII_59775_G_A_5875	0.0579168	3.97644	0.0112955	0.0836015	3.82577e-13	1.34952e-12	FALSE
YCL036W	GFD2	chrIII_59775_G_A_5875	-0.186975	1.21709	0.563522	0.0475327	0.00028752	0.000579498	FALSE
YCL037C	SRO9	chrIII_59775_G_A_5875	0.146791	3.29927	0.0421892	0.0783965	1.40178e-07	3.70397e-07	FALSE
YCL038C	ATG22	chrIII_53891_T_C_5862	0.160626	1.97705	0.251894	0.0566272	6.13726e-07	1.54935e-06	FALSE
YCL039W	GID7	chrIII_53891_T_C_5862	-0.106939	2.01079	0.243924	0.0246422	0.0332463	0.0509931	FALSE
YCL043C	PDI1	chrIII_48180_G_C_5835	-0.0077347	0.385668	0.929849	-0.00843128	0.446001	0.522872	FALSE
YCL044C	MGR1	chrIII_48180_G_C_5835	0.0161436	0.601017	0.843759	0.0104464	0.356169	0.432854	FALSE
YCL050C	APA1	chrIII_37651_A_G_5823	0.0129797	0.842156	0.736416	-0.0178602	0.00183894	0.00338431	FALSE
YCL051W	LRE1	chrIII_37651_A_G_5823	-0.0844343	1.40663	0.478689	0.0208414	0.00634555	0.0108829	FALSE
YCL052C	PBN1	chrIII_37651_A_G_5823	0.032282	0.722045	0.788926	0.00452239	0.654456	0.717717	FALSE
YCL057C-A	MIC10	chrIII_23149_T_C_5811	0.00276056	0.637951	0.826345	0.00369607	0.637307	0.701602	FALSE
YCL059C	KRR1	chrIII_23149_T_C_5811	-0.0148539	0.842368	0.736298	-0.00657536	0.408604	0.486243	FALSE
YCL061C	MRC1	chrIII_23149_T_C_5811	0.0562101	0.922121	0.693148	-0.00858149	0.255865	0.325481	FALSE
YCL064C	CHA1	chrIII_23149_T_C_5811	-0.156819	2.15587	0.206835	-0.0128276	0.423101	0.500784	FALSE
YCL069W	VBA3	chrIII_4489_T_C_5788	2.19677	87.6637	0				FALSE
YCL073C	GEX1	chrIII_4489_T_C_5788	0.714387	12.8731	0				FALSE
YCR002C	CDC10	chrIII_130372_G_A_6060	-0.0123978	1.17582	0.578438	7.26844e-05	0.988861	0.991636	FALSE
YCR004C	YCP4	chrIII_130372_G_A_6060	-0.0597535	3.63066	0.023061	-0.0788997	1.74963e-18	7.5391e-18	FALSE
YCR005C	CIT2	chrIII_130372_G_A_6060	-0.0252786	1.64556	0.375823	-0.0196908	0.332066	0.408598	FALSE
YCR007C	YCR007C	chrIII_130372_G_A_6060	-0.243701	1.739	0.339156	0.00262499	0.838868	0.872117	FALSE
YCR008W	SAT4	chrIII_130372_G_A_6060	0.0479068	0.0798944	0.997864	-0.0333488	1.398e-07	3.69569e-07	FALSE
YCR009C	RVS161	chrIII_130940_A_G_6063	-0.0236103	2.44603	0.145479	0.0427758	1.91137e-07	4.99965e-07	FALSE
YCR010C	ADY2	chrIII_130940_A_G_6063	-0.235411	1.01422	0.651698				FALSE
YCR013C	YCR013C	chrIII_139959_G_A_6073	-0.100939	2.16694	0.205007	0.0203224	0.386278	0.463145	FALSE
YCR014C	POL4	chrIII_139959_G_A_6073	-0.387064	3.80094	0.0173489	-0.012849	0.065008	0.0949465	FALSE
YCR015C	CTO1	chrIII_139959_G_A_6073	-0.102793	1.93176	0.27013	-0.0158252	0.0268866	0.0419934	FALSE
YCR017C	CWH43	chrIII_139959_G_A_6073	-0.132734	4.1772	0.00776197	-0.0824608	3.83475e-33	2.5117e-32	FALSE
YCR018C	SRD1	chrIII_152546_A_G_6084	-0.526261	15.1909	0	-1.91757	0	0	FALSE
YCR018C-A	YCR018C-A	chrIII_152546_A_G_6084	0.0843929	0.775648	0.766601	-0.0867655	1.88531e-07	4.93824e-07	FALSE
YCR019W	MAK32	chrIII_152546_A_G_6084	0.0713733	1.18322	0.576609	-0.00875314	0.179278	0.238787	FALSE
YCR020C	PET18	chrIII_152546_A_G_6084	-0.180743	1.23804	0.551996	-0.0393196	0.0291404	0.0452048	FALSE
YCR020C-A	MAK31	chrIII_152546_A_G_6084	0.052713	0.462855	0.902097	-0.0339664	3.22861e-05	7.13064e-05	FALSE
YCR021C	HSP30	chrIII_158378_T_C_6089	-0.172703	1.51229	0.431742	-0.0845233	0.0131986	0.0216307	FALSE
YCR023C	YCR023C	chrIII_158378_T_C_6089	-0.429195	16.8712	0	-0.00758253	0.341354	0.418406	FALSE
YCR024C	SLM5	chrIII_162941_C_A_6097	0.0272764	0.809323	0.750699	-0.0655069	1.16953e-06	2.8912e-06	FALSE
YCR024C-A	PMP1	chrIII_162941_C_A_6097	-0.763892	48.6842	0	-0.0385514	1.05729e-05	2.43676e-05	FALSE
YCR024C-B	YCR024C-B	chrIII_162941_C_A_6097	-0.0504986	3.18019	0.0491147	0.0126921	0.341561	0.41857	FALSE
YCR025C	YCR025C	chrIII_162941_C_A_6097	0.144403	0.417444	0.918605	0.0934076	0.000923354	0.00175582	FALSE
YCR026C	NPP1	chrIII_162941_C_A_6097	-0.0368202	0.850483	0.731829	0.0596314	2.11677e-21	1.00696e-20	FALSE
YCR027C	RHB1	chrIII_162941_C_A_6097	0.00736979	0.536089	0.871905	0.0664994	1.59623e-22	7.86152e-22	FALSE
YCR028C	FEN2	chrIII_175328_A_G_6121	0.0207328	1.04172	0.639508	-0.00674092	0.326477	0.402587	FALSE
YCR028C-A	RIM1	chrIII_175328_A_G_6121	-0.0247947	2.02519	0.239193	0.00897524	0.0653133	0.0953438	FALSE
YCR030C	SYP1	chrIII_175328_A_G_6121	-0.0887679	0.729447	0.785112	0.0256315	0.0361744	0.0552029	FALSE
YCR031C	RPS14A	chrIII_175328_A_G_6121	0.00506571	0.597109	0.845361	-0.0639439	2.0845e-15	8.07533e-15	FALSE
YCR032W	BPH1	chrIII_187655_G_A_6142	-0.040133	0.618623	0.834586	0.0122995	0.128188	0.176792	FALSE
YCR033W	SNT1	chrIII_187655_G_A_6142	-0.340013	4.91947	0.0017991	0.030338	2.13225e-06	5.1948e-06	FALSE
YCR035C	RRP43	chrIII_187655_G_A_6142	-0.018775	0.74199	0.778906	-0.101366	1.55608e-58	1.77245e-57	FALSE
YCR037C	PHO87	chrIII_187655_G_A_6142	0.0572743	0.733483	0.782981	-0.0453106	1.70295e-13	6.10115e-13	FALSE
YCR038C	BUD5	chrIII_204897_G_C_6178	0.125984	1.08256	0.620261	0.0141263	0.149175	0.203479	FALSE
YCR039C	MATALPHA2	chrIII_204897_G_C_6178	-0.0777995	2.53523	0.127495	0.954771	0	0	FALSE
YCR042C	TAF2	chrIII_204897_G_C_6178	-0.0165598	2.30377	0.172879	0.0165687	0.00485543	0.0084567	FALSE
YCR043C	YCR043C	chrIII_207086_G_C_6179	-0.0271097	0.604006	0.842512	0.00340092	0.642003	0.706093	FALSE
YCR044C	PER1	chrIII_207086_G_C_6179	-0.00641636	1.32686	0.512787	0.018405	0.000691552	0.00133052	FALSE
YCR059C	YIH1	chrIII_224846_T_C_6199	0.0291694	0.785721	0.761129	0.0114986	0.0328242	0.0503727	FALSE
YCR060W	TAH1	chrIII_224846_T_C_6199	0.203179	1.78115	0.320999	0.0644348	1.04425e-14	3.95694e-14	FALSE
YCR087C-A	YCR087C-A	chrIII_263790_A_C_6382	0.172857	11.4171	0	0.0668753	8.88321e-09	2.53844e-08	FALSE
YCR087W	YCR087W	chrIII_263790_A_C_6382	0.0396532	0.432515	0.914346	-0.167333	1.42897e-13	5.15185e-13	FALSE
YCR090C	YCR090C	chrIII_274530_A_G_6408	-0.0060751	2.34925	0.164087	-0.001059	0.892044	0.915582	FALSE
YCR092C	MSH3	chrIII_274530_A_G_6408	-0.0448347	1.08319	0.619922	-0.00575947	0.363937	0.440982	FALSE
YCR093W	CDC39	chrIII_286440_A_G_6416	0.0978529	3.15659	0.0508106	0.0667309	1.76602e-12	6.05041e-12	FALSE
YCR095C	OCA4	chrIII_286440_A_G_6416	-0.0614496	0.978689	0.665832	0.00484173	0.527745	0.600646	FALSE
YCR097W	HMRA1	chrIII_292937_C_T_6427	0.0165445	1.28601	0.530102	-0.49468	5.4189e-05	0.000117014	FALSE
YCR099C	YCR099C	chrIII_292937_C_T_6427	0.324752	2.83257	0.0840254	0.141173	4.92815e-13	1.72381e-12	FALSE
YCR102C	YCR102C	chrIII_314986_T_A_6498	-0.0944111	1.63217	0.379823	0.0299436	0.322592	0.398226	FALSE
YCR104W	PAU3	chrIII_314986_T_A_6498	0.220673	2.15602	0.206828	0.205338	2.17418e-07	5.66892e-07	FALSE
YCR105W	ADH7	chrIII_314986_T_A_6498	-0.0225631	0.467297	0.900266	0.0705343	0.00633983	0.0108764	FALSE
YCR106W	RDS1	chrIII_314986_T_A_6498	0.662395	20.0892	0	-0.0026215	0.904908	0.924802	FALSE
YCR107W	AAD3	chrIII_314986_T_A_6498	0.434371	5.02817	0.0017991	0.00181965	0.929224	0.944252	FALSE
YDL001W	RMD1	chrIV_450232_G_A_8476	-0.141312	3.25974	0.0441803	-0.0543405	9.9932e-19	4.33873e-18	FALSE
YDL002C	NHP10	chrIV_446874_C_T_8446	0.072002	0.948534	0.680605	0.0074163	0.355166	0.432094	FALSE
YDL003W	MCD1	chrIV_446874_C_T_8446	0.0130457	0.480668	0.894041	0.0148682	0.151849	0.206584	FALSE
YDL005C	MED2	chrIV_441629_G_A_8421	-0.0217635	0.557307	0.862193	-0.0932756	3.04689e-40	2.34168e-39	FALSE
YDL006W	PTC1	chrIV_441629_G_A_8421	0.134656	6.622	0.000403226	0.0799561	1.28633e-30	7.93443e-30	FALSE
YDL007W	RPT2	chrIV_441629_G_A_8421	0.02946	3.25524	0.0442409	0.0129207	0.047638	0.0712328	FALSE
YDL008W	APC11	chrIV_433099_G_A_8338	-0.131848	6.44752	0.000403226	-0.179539	8.6628e-88	1.49649e-86	FALSE
YDL010W	GRX6	chrIV_433099_G_A_8338	-0.0973427	4.91727	0.0017991	-0.144923	9.4382e-57	1.02018e-55	FALSE
YDL012C	YDL012C	chrIV_433099_G_A_8338	-0.273277	87.1692	0	-0.28922	2.88073e-149	9.68943e-148	TRUE
YDL013W	SLX5	chrIV_428826_C_T_8329	0.0474437	0.69861	0.800333	-0.00303882	0.590121	0.657297	FALSE
YDL014W	NOP1	chrIV_428826_C_T_8329	-0.0321504	2.9477	0.074828	0.0140433	0.110134	0.15416	FALSE
YDL015C	TSC13	chrIV_428826_C_T_8329	-0.0181338	1.35915	0.499415	-0.0279396	4.36595e-08	1.19619e-07	FALSE
YDL016C	YDL016C	chrIV_428826_C_T_8329	-0.0847726	0.886937	0.712672				FALSE
YDL017W	CDC7	chrIV_428826_C_T_8329	0.112013	1.28082	0.53151	0.0884513	4.29356e-34	2.90539e-33	FALSE
YDL018C	ERP3	chrIV_428826_C_T_8329	0.0166561	0.456432	0.904535	-0.0191087	0.0181916	0.0291452	FALSE
YDL019C	OSH2	chrIV_415090_T_C_8311	-0.0406381	0.887855	0.712344	0.0204852	0.112387	0.157077	FALSE
YDL020C	RPN4	chrIV_415090_T_C_8311	0.201039	11.3877	0	0.206281	9.08964e-59	1.04157e-57	FALSE
YDL021W	GPM2	chrIV_415090_T_C_8311	0.0301275	1.77642	0.323242	-0.100675	4.70344e-07	1.20171e-06	FALSE
YDL025C	RTK1	chrIV_404459_A_T_8301	-0.01155	2.10913	0.217943	-0.0258582	0.0114651	0.0189308	FALSE
YDL027C	MRX9	chrIV_404459_A_T_8301	-0.0248882	0.668133	0.812416	0.0396966	0.00160753	0.00297568	FALSE
YDL030W	PRP9	chrIV_398523_T_G_8296	0.0209412	0.863272	0.725189	0.00457158	0.47172	0.546897	FALSE
YDL031W	DBP10	chrIV_398523_T_G_8296	0.00658976	0.584683	0.84992	0.00372279	0.649592	0.713205	FALSE
YDL033C	SLM3	chrIV_392128_C_G_8289	-0.061097	1.03249	0.643793	0.000897456	0.918467	0.934982	FALSE
YDL035C	GPR1	chrIV_392128_C_G_8289	0.00585822	0.174159	0.989325	0.00372296	0.544239	0.615986	FALSE
YDL036C	PUS9	chrIV_386785_T_C_8279	-0.139275	1.44478	0.460509	-0.0402342	5.92818e-07	1.49988e-06	FALSE
YDL039C	PRM7	chrIV_386785_T_C_8279	0.392027	3.8634	0.0150688	-0.595187	1.11963e-88	1.95781e-87	FALSE
YDL040C	NAT1	chrIV_375394_A_C_8255	-0.0353372	0.509131	0.882142	0.020102	2.1441e-05	4.80218e-05	FALSE
YDL042C	SIR2	chrIV_375394_A_C_8255	-0.00771502	0.416841	0.918872	-0.00780215	0.291628	0.36445	FALSE
YDL043C	PRP11	chrIV_375394_A_C_8255	0.0030397	0.906734	0.701002	0.0207387	0.00381837	0.00672212	FALSE
YDL044C	MTF2	chrIV_375394_A_C_8255	0.00616246	0.50249	0.885108	0.0261413	0.000963572	0.00182743	FALSE
YDL045C	FAD1	chrIV_372564_A_G_8253	0.0158121	0.278786	0.963695	0.0155228	0.0376298	0.0572558	FALSE
YDL045W-A	MRP10	chrIV_372564_A_G_8253	0.0660919	3.03751	0.0634011	0.100822	9.0492e-34	6.02367e-33	FALSE
YDL048C	STP4	chrIV_364908_T_C_8197	0.070476	1.56923	0.406342	-0.162965	1.2115e-19	5.4375e-19	FALSE
YDL049C	KNH1	chrIV_364908_T_C_8197	0.0126237	1.30138	0.523426	0.026652	0.0246214	0.0386879	FALSE
YDL051W	LHP1	chrIV_364908_T_C_8197	0.00151879	0.474327	0.897048	0.006911	0.349707	0.426627	FALSE
YDL053C	PBP4	chrIV_361844_A_G_8188	-0.00967688	0.374441	0.934261	-0.0641635	1.37181e-27	7.75101e-27	FALSE
YDL054C	MCH1	chrIV_361844_A_G_8188	0.0205155	2.50444	0.134404	0.00277343	0.678917	0.738313	FALSE
YDL056W	MBP1	chrIV_353682_T_G_8181	-0.0510884	1.62271	0.382962	-0.012881	0.0301466	0.0465887	FALSE
YDL057W	YDL057W	chrIV_353682_T_G_8181	0.103102	2.16054	0.206516	-0.00302708	0.750181	0.798201	FALSE
YDL058W	USO1	chrIV_346745_G_A_8178	0.0442825	1.00233	0.658344	0.000514973	0.942303	0.954948	FALSE
YDL059C	RAD59	chrIV_346745_G_A_8178	0.0778109	2.58623	0.118902	0.00180955	0.873739	0.900674	FALSE
YDL060W	TSR1	chrIV_341953_G_A_8176	0.120033	2.2867	0.176164	0.00414595	0.664431	0.72615	FALSE
YDL061C	RPS29B	chrIV_341953_G_A_8176	0.00867838	0.999288	0.659798	0.00379057	0.545397	0.617052	FALSE
YDL063C	SYO1	chrIV_336943_T_C_8174	0.097786	1.43475	0.465391	0.00816825	0.534619	0.60702	FALSE
YDL064W	UBC9	chrIV_336943_T_C_8174	0.0146668	2.20234	0.195462	-0.00306905	0.545151	0.616895	FALSE
YDL065C	PEX19	chrIV_336943_T_C_8174	-0.050934	4.77663	0.00221872	-0.00497598	0.464589	0.540382	TRUE
YDL066W	IDP1	chrIV_334393_T_C_8170	0.0287772	1.42567	0.470173	0.0739956	6.95724e-12	2.31827e-11	FALSE
YDL067C	COX9	chrIV_334393_T_C_8170	0.0114107	0.782685	0.762987	0.00163462	0.846263	0.877732	FALSE
YDL069C	CBS1	chrIV_334393_T_C_8170	-0.0424894	1.17601	0.578374	0.012234	0.186541	0.247079	FALSE
YDL070W	BDF2	chrIV_330288_C_T_8168	0.00912905	1.93725	0.267717	-0.0195486	0.0176462	0.0283191	FALSE
YDL072C	YET3	chrIV_330288_C_T_8168	0.0283968	1.05646	0.633757	-0.0175988	0.0452194	0.0679004	FALSE
YDL073W	AHK1	chrIV_330288_C_T_8168	0.0357862	1.46516	0.451344	0.0188437	0.00219461	0.00399134	FALSE
YDL074C	BRE1	chrIV_320548_T_C_8152	-0.027126	0.71004	0.795467	-0.0262537	2.41962e-06	5.87489e-06	FALSE
YDL075W	RPL31A	chrIV_320548_T_C_8152	-0.000806096	0.74822	0.77697	-0.00129557	0.850374	0.881036	FALSE
YDL076C	RXT3	chrIV_320548_T_C_8152	-0.0640368	2.2486	0.186386	0.0283828	0.000221989	0.000451881	FALSE
YDL077C	VAM6	chrIV_320548_T_C_8152	0.0499382	1.25503	0.545109	0.023128	0.00163626	0.00302493	FALSE
YDL078C	MDH3	chrIV_314015_T_C_8147	-0.00898887	0.50515	0.88392	0.014398	0.087586	0.124954	FALSE
YDL079C	MRK1	chrIV_314015_T_C_8147	0.166096	1.33783	0.50913	0.130903	1.10017e-07	2.93413e-07	FALSE
YDL080C	THI3	chrIV_310132_T_C_8137	0.00383113	2.64476	0.10837	-0.0302199	9.9415e-07	2.47585e-06	FALSE
YDL081C	RPP1A	chrIV_310132_T_C_8137	0.0226504	5.7021	0.000403226	0.0334486	8.72922e-07	2.18632e-06	FALSE
YDL082W	RPL13A	chrIV_310132_T_C_8137	0.0106806	1.03473	0.642709	-0.0695419	9.50771e-23	4.6988e-22	FALSE
YDL083C	RPS16B	chrIV_310132_T_C_8137	0.00505526	0.583191	0.850387	0.00666278	0.355646	0.432493	FALSE
YDL084W	SUB2	chrIV_304248_C_T_8106	-0.0164888	1.18877	0.575831	-0.0588369	1.84349e-24	9.60901e-24	FALSE
YDL085C-A	YDL085C-A	chrIV_302423_C_A_8095	-0.00814128	0.548968	0.866746	-0.152343	9.92462e-35	6.82079e-34	FALSE
YDL085W	NDE2	chrIV_304248_C_T_8106	0.0335703	2.48434	0.13818	0.0244354	0.399912	0.477091	FALSE
YDL086C-A	YDL086C-A	chrIV_301279_C_A_8083	-0.0346721	0.701098	0.799242	0.213061	6.52358e-14	2.38046e-13	FALSE
YDL086W	YDL086W	chrIV_302423_C_A_8095	-0.171976	15.2457	0	-0.211202	7.54064e-49	6.89878e-48	FALSE
YDL087C	LUC7	chrIV_301279_C_A_8083	-0.0145135	1.94932	0.262304	-0.109165	1.66053e-29	9.99466e-29	FALSE
YDL088C	ASM4	chrIV_301279_C_A_8083	-0.0222279	0.727309	0.786214	0.034709	2.65705e-10	8.20357e-10	FALSE
YDL089W	NUR1	chrIV_301279_C_A_8083	-0.152825	4.76987	0.0026011	-0.127539	1.01818e-31	6.4545e-31	FALSE
YDL090C	RAM1	chrIV_290096_A_G_8014	0.108905	3.5573	0.0248096	-0.0194534	0.0230669	0.0363551	FALSE
YDL091C	UBX3	chrIV_290096_A_G_8014	-0.0791678	1.48353	0.441646	-0.0602928	4.20039e-10	1.28369e-09	FALSE
YDL092W	SRP14	chrIV_290096_A_G_8014	0.0406203	3.00458	0.0679282	-0.0499298	9.72014e-12	3.20714e-11	FALSE
YDL093W	PMT5	chrIV_290096_A_G_8014	-0.0971465	3.58239	0.0241648	0.0169735	0.0472078	0.0706449	FALSE
YDL101C	DUN1	chrIV_280298_T_A_7947	-0.0924402	1.88687	0.284356	0.0153654	0.0322421	0.0495325	FALSE
YDL102W	POL3	chrIV_280298_T_A_7947	0.0271865	0.727523	0.786104	-0.00689897	0.273069	0.344226	FALSE
YDL103C	QRI1	chrIV_275111_T_C_7917	0.00300478	1.80168	0.31423	-0.0659873	6.14688e-34	4.1205e-33	FALSE
YDL104C	QRI7	chrIV_275111_T_C_7917	0.075734	1.64231	0.376934	0.0992339	1.12278e-25	6.07384e-25	FALSE
YDL105W	NSE4	chrIV_275111_T_C_7917	-0.35145	5.72993	0.000403226	0.0450293	3.44639e-08	9.50167e-08	FALSE
YDL106C	PHO2	chrIV_268701_A_T_7874	-0.0914803	1.09415	0.61437	-0.0183109	0.012411	0.0203925	FALSE
YDL107W	MSS2	chrIV_268701_A_T_7874	0.245301	5.29522	0.000653595	0.0793349	1.44102e-13	5.19204e-13	FALSE
YDL108W	KIN28	chrIV_268701_A_T_7874	0.0896425	2.44737	0.145309	0.00613902	0.258961	0.329053	FALSE
YDL111C	RRP42	chrIV_263044_A_G_7846	-0.00458119	0.159641	0.990689	-0.0132697	0.0225419	0.0355767	FALSE
YDL112W	TRM3	chrIV_263044_A_G_7846	-0.0460896	0.624063	0.832393	-0.0383219	1.68388e-05	3.79221e-05	FALSE
YDL113C	ATG20	chrIV_263044_A_G_7846	-0.214181	4.7438	0.0028777	-0.0403082	0.000120221	0.000251619	FALSE
YDL115C	IWR1	chrIV_251115_C_T_7773	-0.0219822	1.30552	0.521673	0.0465488	7.17148e-08	1.9416e-07	FALSE
YDL116W	NUP84	chrIV_251115_C_T_7773	-0.118095	4.22991	0.00763158	-0.0155081	0.000676921	0.00130368	FALSE
YDL117W	CYK3	chrIV_251115_C_T_7773	0.0146991	0.213284	0.980726	-0.033466	5.9813e-09	1.72215e-08	FALSE
YDL119C	HEM25	chrIV_246743_G_C_7752	0.0325682	1.5703	0.405843	0.0150207	0.11678	0.162508	FALSE
YDL120W	YFH1	chrIV_246743_G_C_7752	-0.0959853	3.88178	0.0145103	-0.0921816	1.99509e-23	1.00866e-22	FALSE
YDL121C	YDL121C	chrIV_244279_G_C_7750	0.0036822	0.811527	0.749612	-0.0125539	0.111656	0.156099	FALSE
YDL122W	UBP1	chrIV_244279_G_C_7750	0.0172068	1.38695	0.487635	-0.00964214	0.124104	0.171614	FALSE
YDL123W	SNA4	chrIV_240564_T_G_7740	-0.0530147	1.96161	0.25742	0.0328779	0.000500409	0.000983279	FALSE
YDL124W	YDL124W	chrIV_240564_T_G_7740	-0.539793	382.363	0	-0.837937	7.16108e-228	4.54967e-226	TRUE
YDL133C-A	RPL41B	chrIV_222741_C_A_7601	0.00855399	1.44097	0.46221				FALSE
YDL133W	SRF1	chrIV_222741_C_A_7601	-0.0928132	3.32131	0.0401774	-0.0705896	4.24107e-29	2.50521e-28	FALSE
YDL140C	RPO21	chrIV_205528_T_C_7495	-0.000841394	1.26034	0.542381	-0.0347603	0.000657324	0.00126841	FALSE
YDL141W	BPL1	chrIV_205528_T_C_7495	0.0182952	1.36647	0.496494	-0.110539	1.6279e-56	1.7464e-55	FALSE
YDL142C	CRD1	chrIV_201393_C_T_7470	-0.0700131	1.06517	0.629172	-0.0157488	0.0651331	0.095105	FALSE
YDL143W	CCT4	chrIV_201393_C_T_7470	0.0581777	3.47468	0.0298385	0.0294961	4.96683e-14	1.82053e-13	FALSE
YDL146W	LDB17	chrIV_190212_C_A_7413	-0.0868199	0.895404	0.707862	-0.109896	1.67908e-20	7.74272e-20	FALSE
YDL147W	RPN5	chrIV_190212_C_A_7413	-0.090001	9.04239	0	-0.0662733	1.93771e-21	9.23318e-21	FALSE
YDL148C	NOP14	chrIV_190212_C_A_7413	-0.0288096	0.498326	0.88695	-0.0200051	0.0519152	0.0772045	FALSE
YDL149W	ATG9	chrIV_183645_C_T_7371	0.0812561	1.29232	0.527858	0.00655274	0.561385	0.631517	FALSE
YDL150W	RPC53	chrIV_183645_C_T_7371	-0.0276973	0.620471	0.833565	-0.0279686	8.28712e-05	0.000176286	FALSE
YDL153C	SAS10	chrIV_183645_C_T_7371	0.0143701	0.897687	0.706293	-0.0230812	0.00788116	0.0133366	FALSE
YDL154W	MSH5	chrIV_178032_A_G_7336	-0.194422	0.959571	0.67592	-0.0504208	2.6536e-05	5.89711e-05	FALSE
YDL155W	CLB3	chrIV_178032_A_G_7336	0.0430591	1.24241	0.550326	-0.0517488	2.70963e-23	1.3579e-22	FALSE
YDL157C	YDL157C	chrIV_174089_G_A_7309	0.0991566	11.6403	0	0.124657	5.69306e-66	7.18608e-65	FALSE
YDL158C	YDL158C	chrIV_174089_G_A_7309	-1.07371	22.2357	0	-0.63507	9.01911e-83	1.46509e-81	FALSE
YDL159W	STE7	chrIV_174089_G_A_7309	0.0433081	0.39771	0.927066	0.0320315	9.9891e-07	2.48554e-06	FALSE
YDL160C	DHH1	chrIV_170354_T_C_7293	0.184119	3.38005	0.034609	-0.271251	1.84351e-98	3.63489e-97	FALSE
YDL160C-A	MHF2	chrIV_170354_T_C_7293	-0.0176151	0.383852	0.930477	-0.0480873	6.59314e-06	1.54697e-05	FALSE
YDL161W	ENT1	chrIV_170354_T_C_7293	0.0222456	1.65045	0.374097	0.00943345	0.207314	0.27201	FALSE
YDL165W	CDC36	chrIV_163737_G_A_7261	-0.0110592	1.65396	0.372432	-0.00123075	0.809212	0.846235	FALSE
YDL166C	FAP7	chrIV_163737_G_A_7261	0.0308214	1.09139	0.615629	0.075788	5.36861e-31	3.33671e-30	FALSE
YDL171C	GLT1	chrIV_148986_T_C_7168	0.276494	10.3719	0	-0.0532727	0.00126559	0.00237189	FALSE
YDL173W	PAR32	chrIV_148986_T_C_7168	0.413426	70.9705	0	-0.041551	1.88356e-10	5.87892e-10	FALSE
YDL174C	DLD1	chrIV_145769_T_C_7151	0.0862016	4.0475	0.0103797	0.101499	1.52203e-14	5.71813e-14	FALSE
YDL175C	AIR2	chrIV_145769_T_C_7151	-0.0345857	1.17119	0.579962	-0.0199101	0.00317488	0.00565191	FALSE
YDL176W	YDL176W	chrIV_141006_G_A_7130	0.22817	3.95528	0.0114286	-0.0502146	2.73808e-16	1.09562e-15	FALSE
YDL177C	YDL177C	chrIV_141006_G_A_7130	-0.0568647	2.79254	0.0886341	0.0278654	0.00088588	0.00168792	FALSE
YDL178W	DLD2	chrIV_141006_G_A_7130	-0.0213012	0.707163	0.796686	0.0250791	0.00210188	0.00383366	FALSE
YDL179W	PCL9	chrIV_141006_G_A_7130	0.0017041	0.0600613	0.99825	-0.00544112	0.506897	0.580733	FALSE
YDL180W	YDL180W	chrIV_132560_G_A_7106	-0.0195201	1.32267	0.514371	0.148755	9.35086e-96	1.77635e-94	FALSE
YDL181W	INH1	chrIV_132560_G_A_7106	-0.0026109	1.20118	0.571275	-0.0784304	2.98766e-09	8.7428e-09	FALSE
YDL182W	LYS20	chrIV_132560_G_A_7106	-0.0251713	2.33947	0.166031	0.0548308	2.9271e-07	7.57681e-07	FALSE
YDL183C	YDL183C	chrIV_132560_G_A_7106	-0.0143583	0.442647	0.909998	-0.0246138	0.0306048	0.0472329	FALSE
YDL185W	VMA1	chrIV_127308_T_C_7076	0.000520935	1.76768	0.327573	0.0171811	0.0391727	0.0593821	FALSE
YDL187C	YDL187C	chrIV_127308_T_C_7076	-0.110693	0.666397	0.813176	0.183506	1.14832e-07	3.05133e-07	FALSE
YDL188C	PPH22	chrIV_127308_T_C_7076	-0.0274325	0.647054	0.822517	-0.00684275	0.338396	0.415314	FALSE
YDL189W	RBS1	chrIV_127308_T_C_7076	0.00544861	0.178159	0.98869	-0.100881	6.20395e-71	8.48665e-70	FALSE
YDL190C	UFD2	chrIV_117170_C_T_7017	-0.0125911	0.621702	0.833164	0.00919698	0.141157	0.193327	FALSE
YDL191W	RPL35A	chrIV_117170_C_T_7017	0.0112369	2.01938	0.241259	0.0266288	0.000398983	0.000792422	FALSE
YDL192W	ARF1	chrIV_117170_C_T_7017	0.0174997	2.55388	0.123577	0.0191837	0.000355283	0.00070982	FALSE
YDL193W	NUS1	chrIV_117170_C_T_7017	-0.109013	3.64662	0.0220281	-0.0598124	3.40554e-10	1.04468e-09	FALSE
YDL194W	SNF3	chrIV_117170_C_T_7017	0.231604	3.64654	0.0220365	0.0262306	0.0297044	0.0459416	FALSE
YDL199C	YDL199C	chrIV_101608_G_A_6899	0.389709	8.834	0	0.025767	0.131397	0.180781	FALSE
YDL200C	MGT1	chrIV_101608_G_A_6899	-0.0375583	0.705528	0.797375	0.00265007	0.766685	0.812135	FALSE
YDL201W	TRM8	chrIV_101608_G_A_6899	-0.0437176	1.3006	0.523756	-0.0330069	1.15758e-05	2.65719e-05	FALSE
YDL202W	MRPL11	chrIV_101608_G_A_6899	-0.063893	0.785834	0.76106	-0.0485095	1.39087e-07	3.67853e-07	FALSE
YDL203C	ACK1	chrIV_96124_T_A_6858	0.0469998	0.647244	0.822443	-0.0106828	0.0681322	0.0991803	FALSE
YDL204W	RTN2	chrIV_96124_T_A_6858	-0.0646253	1.34042	0.5082	0.0948465	0.00256525	0.004626	FALSE
YDL205C	HEM3	chrIV_94417_C_T_6848	-0.196885	1.54453	0.417539	0.00733847	0.287833	0.36069	FALSE
YDL206W	YDL206W	chrIV_94417_C_T_6848	0.0986386	2.56868	0.121714	-0.0207345	0.0819056	0.117407	FALSE
YDL207W	GLE1	chrIV_88010_A_G_6810	-0.0989817	4.42657	0.00544959	-0.0644583	2.71888e-31	1.70842e-30	FALSE
YDL208W	NHP2	chrIV_88010_A_G_6810	0.0851587	11.7863	0	0.0138513	0.0560334	0.0827477	FALSE
YDL209C	CWC2	chrIV_86165_T_G_6802	-0.0824432	5.0761	0.0017991	-0.0660412	2.23206e-17	9.2485e-17	TRUE
YDL210W	UGA4	chrIV_86165_T_G_6802	-0.215163	2.61928	0.114119	-0.0680203	0.000338477	0.000679092	FALSE
YDL213C	NOP6	chrIV_77295_A_G_6708	-0.136325	10.6332	0	-0.0564093	2.41547e-12	8.22121e-12	FALSE
YDL214C	PRR2	chrIV_77295_A_G_6708	0.0823057	1.72512	0.343803	0.143044	5.69902e-10	1.72875e-09	FALSE
YDL215C	GDH2	chrIV_68677_T_C_6655	-0.0153913	0.147467	0.992147	-0.00577816	0.497368	0.571419	FALSE
YDL216C	RRI1	chrIV_68677_T_C_6655	-1.21909	35.9002	0	-0.232286	1.31292e-77	1.95502e-76	FALSE
YDL224C	WHI4	chrIV_54223_C_T_6591	0.0707036	1.7556	0.332574	0.0258293	0.000597563	0.00116141	FALSE
YDL225W	SHS1	chrIV_54223_C_T_6591	0.00323285	2.23768	0.187283	0.0183413	0.0018412	0.00338738	FALSE
YDL227C	HO	chrIV_48349_G_A_6579	-0.813062	21.9617	0	-3.4855	0	0	TRUE
YDL229W	SSB1	chrIV_48349_G_A_6579	-0.05675	10.0233	0	0.0281977	0.000122051	0.000255356	FALSE
YDL230W	PTP1	chrIV_40439_T_C_6565	-0.0597373	0.880523	0.714965	-0.050373	2.90873e-07	7.53267e-07	FALSE
YDL231C	BRE4	chrIV_40439_T_C_6565	0.579534	54.7009	0	0.364662	0	0	FALSE
YDL232W	OST4	chrIV_37106_C_T_6563	-0.0279019	2.20632	0.194206	-0.0526927	1.15644e-06	2.86257e-06	FALSE
YDL233W	MFG1	chrIV_37106_C_T_6563	-0.0363788	0.486692	0.891806	0.00765931	0.386063	0.462984	FALSE
YDL234C	GYP7	chrIV_37106_C_T_6563	-0.000168878	1.30828	0.520507	0.0110467	0.334575	0.411154	FALSE
YDL235C	YPD1	chrIV_33211_A_G_6558	0.110547	7.11792	0.000403226	0.04077	7.03397e-09	2.01909e-08	FALSE
YDL236W	PHO13	chrIV_33211_A_G_6558	0.121336	12.1158	0	-0.073904	2.14333e-27	1.20507e-26	FALSE
YDL237W	AIM6	chrIV_30404_C_T_6555	-0.0873383	4.11594	0.00842912	-0.0454519	4.34267e-11	1.39659e-10	FALSE
YDL238C	GUD1	chrIV_30404_C_T_6555	-0.174946	1.86757	0.291609	-0.0771277	3.60522e-09	1.0523e-08	FALSE
YDL239C	ADY3	chrIV_30404_C_T_6555	-0.150851	3.2668	0.0435533	-0.0771643	9.50002e-09	2.70524e-08	FALSE
YDL243C	AAD4	chrIV_17716_G_A_6546	-1.05087	66.6554	0	-0.11382	0.000515969	0.00101246	FALSE
YDL244W	THI13	chrIV_17716_G_A_6546	0.0306704	0.424031	0.916644				FALSE
YDR001C	NTH1	chrIV_450232_G_A_8476	0.391268	57.1836	0	0.0428167	0.000404362	0.00080227	FALSE
YDR002W	YRB1	chrIV_454913_T_G_8489	-0.0218696	2.19521	0.197178	-0.0140089	0.010744	0.0178224	FALSE
YDR003W	RCR2	chrIV_454913_T_G_8489	0.218261	3.90271	0.0137402	0.0273663	0.00560162	0.00967092	FALSE
YDR003W-A	YDR003W-A	chrIV_454913_T_G_8489	0.018761	1.73069	0.341966	0.0274386	0.2411	0.309313	FALSE
YDR004W	RAD57	chrIV_454913_T_G_8489	-0.0320223	0.826402	0.744673	-0.0335292	1.10376e-08	3.1306e-08	FALSE
YDR005C	MAF1	chrIV_454913_T_G_8489	-0.142273	8.27089	0	-0.110839	8.74759e-39	6.57276e-38	FALSE
YDR006C	SOK1	chrIV_462476_C_T_8504	-0.0213636	1.4703	0.449191	0.0113648	0.101556	0.142923	FALSE
YDR007W	TRP1	chrIV_462476_C_T_8504	0.0540705	2.29058	0.175149	-0.0183829	0.00203476	0.00372073	FALSE
YDR009W	GAL3	chrIV_463263_C_A_8507	0.391621	6.00926	0.000403226	0.267536	6.74999e-57	7.32381e-56	FALSE
YDR011W	SNQ2	chrIV_463263_C_A_8507	-0.0729169	1.00571	0.656513	-0.0593248	4.97886e-07	1.26829e-06	FALSE
YDR012W	RPL4B	chrIV_480076_G_C_8552	-0.0189114	2.70882	0.0992426	0.0232574	0.0469346	0.0702729	FALSE
YDR013W	PSF1	chrIV_480076_G_C_8552	-0.0118763	0.535017	0.87235	-0.0110622	0.169466	0.227466	FALSE
YDR014W	RAD61	chrIV_480076_G_C_8552	-0.0678626	0.397668	0.927073	-0.0259452	0.00491681	0.00855839	FALSE
YDR014W-A	HED1	chrIV_480076_G_C_8552	-0.162602	1.73928	0.33906	-0.00481243	0.845993	0.87761	FALSE
YDR016C	DAD1	chrIV_480076_G_C_8552	0.0243787	0.48486	0.892486	-0.0067935	0.4779	0.552493	FALSE
YDR017C	KCS1	chrIV_480076_G_C_8552	0.0565244	0.870283	0.720367	-0.0207322	0.000273546	0.000552502	FALSE
YDR018C	YDR018C	chrIV_484028_A_G_8559	-0.0715078	0.772892	0.76785	-0.0906491	9.41722e-06	2.1836e-05	FALSE
YDR019C	GCV1	chrIV_484028_A_G_8559	-0.0151234	2.1551	0.20687	0.0780135	2.91588e-11	9.45181e-11	FALSE
YDR023W	SES1	chrIV_492455_C_T_8569	0.0741115	11.755	0	0.0193645	8.49321e-05	0.000180536	FALSE
YDR025W	RPS11A	chrIV_492455_C_T_8569	-0.0022955	0.66865	0.812189	0.023963	0.000276395	0.00055806	FALSE
YDR026C	NSI1	chrIV_492455_C_T_8569	0.0256692	0.695232	0.801858	-0.0120165	0.0524102	0.0778798	FALSE
YDR027C	VPS54	chrIV_492455_C_T_8569	0.0108311	0.265137	0.966883	-0.0167033	0.0244636	0.0384716	FALSE
YDR030C	RAD28	chrIV_504047_G_C_8577	0.108559	3.07854	0.0585141	-0.0225886	0.00543339	0.00940318	FALSE
YDR031W	MIX14	chrIV_504047_G_C_8577	0.0630387	1.54468	0.417486	-0.0113233	0.308682	0.383039	FALSE
YDR032C	PST2	chrIV_504047_G_C_8577	-0.00206158	1.96048	0.25777	-0.0214183	0.0264835	0.041375	FALSE
YDR035W	ARO3	chrIV_523964_T_C_8622	-0.0286955	1.54287	0.41811	-0.0447693	1.48566e-07	3.92018e-07	FALSE
YDR036C	EHD3	chrIV_523964_T_C_8622	0.170417	2.36756	0.160422	0.0299549	0.000903819	0.00171981	FALSE
YDR041W	RSM10	chrIV_547792_T_C_8709	0.0233452	0.692956	0.802885	0.0205038	0.0270145	0.04217	FALSE
YDR042C	YDR042C	chrIV_547792_T_C_8709	-0.49707	2.37846	0.158572	-0.0312517	0.213009	0.278206	FALSE
YDR043C	NRG1	chrIV_547792_T_C_8709	0.0774676	2.25236	0.18595	0.0580628	8.57477e-05	0.000182134	FALSE
YDR044W	HEM13	chrIV_547792_T_C_8709	-0.0901009	1.29527	0.526378	-0.262102	7.29507e-70	9.79184e-69	FALSE
YDR045C	RPC11	chrIV_547792_T_C_8709	-0.0600706	3.03631	0.0635373	-0.0157729	0.0641604	0.0937325	FALSE
YDR046C	BAP3	chrIV_547792_T_C_8709	0.0399184	0.759051	0.772626				FALSE
YDR055W	PST1	chrIV_565313_C_T_8737	-0.0335898	0.168474	0.990085	-0.00235677	0.887579	0.911981	FALSE
YDR056C	EMC10	chrIV_565313_C_T_8737	-0.0207676	1.83857	0.302075	-0.0231208	0.000283241	0.000571075	FALSE
YDR057W	YOS9	chrIV_567417_C_T_8742	-0.0138958	0.127518	0.99409	0.00249775	0.694499	0.751542	FALSE
YDR058C	TGL2	chrIV_567417_C_T_8742	0.0921206	1.59773	0.393492	0.121745	2.59598e-37	1.89819e-36	FALSE
YDR059C	UBC5	chrIV_569301_A_G_8749	-0.108821	5.63527	0.000403226	-0.0856246	1.75039e-08	4.92072e-08	FALSE
YDR060W	MAK21	chrIV_569301_A_G_8749	0.00233527	1.47539	0.446158	0.0329074	0.00122293	0.00229495	FALSE
YDR061W	YDR061W	chrIV_579940_G_A_8787	0.0340867	1.19535	0.573612	-0.0191657	0.011514	0.0190006	FALSE
YDR062W	LCB2	chrIV_579940_G_A_8787	-0.0106384	2.07573	0.226543	-0.0183546	2.95413e-06	7.11231e-06	FALSE
YDR063W	AIM7	chrIV_579940_G_A_8787	0.0962589	7.77108	0	0.204478	6.90243e-154	2.42135e-152	FALSE
YDR064W	RPS13	chrIV_579940_G_A_8787	0.0192902	5.49934	0.000653595	-0.0687781	7.50097e-25	3.96034e-24	FALSE
YDR065W	RRG1	chrIV_582217_G_A_8807	0.176219	1.66001	0.369568	0.0536482	3.82712e-09	1.11531e-08	FALSE
YDR066C	RTR2	chrIV_582217_G_A_8807	0.154258	3.73284	0.0194809	0.0243858	0.0339058	0.0519071	FALSE
YDR071C	PAA1	chrIV_589875_C_T_8849	0.0147561	1.04358	0.638802	0.0467448	8.09785e-15	3.08896e-14	FALSE
YDR072C	IPT1	chrIV_589875_C_T_8849	-0.0229092	1.12737	0.599996	0.129389	4.70089e-46	4.07886e-45	FALSE
YDR078C	SHU2	chrIV_602645_C_T_8929	-0.232957	7.77565	0	-0.226987	5.7672e-49	5.30174e-48	FALSE
YDR079C-A	TFB5	chrIV_602645_C_T_8929	0.127946	5.09403	0.00150376	0.102533	1.30767e-15	5.10044e-15	FALSE
YDR079W	PET100	chrIV_602645_C_T_8929	-0.0649367	3.40285	0.0332039	-0.117772	1.22334e-20	5.6732e-20	FALSE
YDR080W	VPS41	chrIV_607313_G_A_8950	-0.197869	6.83422	0.000403226	0.00614348	0.385995	0.462984	FALSE
YDR081C	PDC2	chrIV_607313_G_A_8950	-0.12121	3.05565	0.0615108	-0.0176713	0.00103155	0.00195182	FALSE
YDR082W	STN1	chrIV_607313_G_A_8950	0.0332879	0.664433	0.814037	-0.0182968	0.00625826	0.0107429	FALSE
YDR083W	RRP8	chrIV_607313_G_A_8950	0.0302306	1.90978	0.276288	-0.00738638	0.468385	0.544134	FALSE
YDR084C	TVP23	chrIV_618461_C_T_8977	0.00228408	2.02801	0.238172	-0.0247138	7.647e-05	0.000162851	FALSE
YDR085C	AFR1	chrIV_618461_C_T_8977	0.206432	3.27977	0.0431903	0.143886	3.93235e-14	1.44995e-13	FALSE
YDR086C	SSS1	chrIV_618461_C_T_8977	0.00538043	0.530606	0.874179	0.0336261	1.56532e-05	3.53915e-05	FALSE
YDR087C	RRP1	chrIV_618461_C_T_8977	0.0959341	3.47159	0.0299871	0.080156	3.80968e-16	1.52121e-15	FALSE
YDR088C	SLU7	chrIV_618461_C_T_8977	0.154474	3.78152	0.0177933	0.0314955	0.000112301	0.000235733	FALSE
YDR091C	RLI1	chrIV_628582_A_G_8998	0.0520709	1.14443	0.59103	0.0936382	2.03251e-24	1.0575e-23	FALSE
YDR092W	UBC13	chrIV_628582_A_G_8998	-0.0271135	1.01671	0.650233	0.0156521	0.00335281	0.00594646	FALSE
YDR093W	DNF2	chrIV_636879_A_C_9014	-0.0375417	0.818583	0.745644	-0.0102851	0.249466	0.318616	FALSE
YDR096W	GIS1	chrIV_636879_A_C_9014	0.0331639	1.28766	0.529654	-0.0502423	0.0020255	0.00370617	FALSE
YDR097C	MSH6	chrIV_636879_A_C_9014	-0.107555	1.05887	0.63278	-0.0295306	0.000893862	0.001702	FALSE
YDR098C	GRX3	chrIV_636879_A_C_9014	-0.000670428	0.410303	0.921776	-0.000264156	0.965924	0.97358	FALSE
YDR099W	BMH2	chrIV_664414_C_T_9034	-0.153954	22.8895	0	-0.0196928	0.000526733	0.00103252	FALSE
YDR100W	TVP15	chrIV_664414_C_T_9034	-0.0514347	5.02265	0.0017991	-0.0739012	2.56337e-16	1.02643e-15	TRUE
YDR101C	ARX1	chrIV_664414_C_T_9034	0.0286768	2.36337	0.160994	-0.00121829	0.90995	0.928626	FALSE
YDR103W	STE5	chrIV_664414_C_T_9034	0.085145	2.1678	0.204806	0.00501787	0.415939	0.493533	FALSE
YDR104C	SPO71	chrIV_664414_C_T_9034	-0.0609259	0.276843	0.964218	0.00647353	0.321948	0.397516	FALSE
YDR105C	TMS1	chrIV_664414_C_T_9034	-0.00149582	0.537111	0.871482	-0.0195115	0.00426538	0.00746767	FALSE
YDR106W	ARP10	chrIV_664414_C_T_9034	0.088446	0.663854	0.814291	0.0192427	0.313214	0.388175	FALSE
YDR107C	TMN2	chrIV_674519_A_G_9040	-0.0327361	0.710437	0.795249	0.0235634	0.00609733	0.0104793	FALSE
YDR108W	TRS85	chrIV_674519_A_G_9040	0.0614868	1.43062	0.467555	0.0127352	0.0243245	0.0382845	FALSE
YDR109C	YDR109C	chrIV_674519_A_G_9040	-0.00941915	1.30198	0.523173	0.00811308	0.161314	0.2177	FALSE
YDR110W	FOB1	chrIV_674519_A_G_9040	-0.00604335	1.2431	0.550082	-0.00077841	0.90863	0.927611	FALSE
YDR111C	ALT2	chrIV_681327_T_G_9051	0.162972	2.01665	0.242107	0.00979963	0.384686	0.46198	FALSE
YDR113C	PDS1	chrIV_681327_T_G_9051	0.0332061	0.280143	0.963335	0.01145	0.154502	0.209695	FALSE
YDR115W	MRX14	chrIV_681327_T_G_9051	0.0367999	2.04306	0.233941	-0.00718557	0.427364	0.505099	FALSE
YDR116C	MRPL1	chrIV_681327_T_G_9051	-0.0841852	0.968501	0.671368	-0.015266	0.164765	0.221877	FALSE
YDR117C	TMA64	chrIV_681327_T_G_9051	-0.0754203	1.52755	0.426207	-0.0671473	5.46952e-25	2.89581e-24	FALSE
YDR118W	APC4	chrIV_681327_T_G_9051	-0.0801366	1.22876	0.556207	0.0211249	0.00972763	0.0162307	FALSE
YDR119W	VBA4	chrIV_694033_T_C_9067	0.0128725	0.745828	0.777713	-0.0841679	1.95039e-29	1.16901e-28	FALSE
YDR119W-A	COX26	chrIV_694033_T_C_9067	-0.250244	0.967056	0.672112	-0.0721361	0.0890843	0.126902	FALSE
YDR120C	TRM1	chrIV_694033_T_C_9067	-0.340967	13.581	0	-0.00282714	0.72411	0.774932	FALSE
YDR121W	DPB4	chrIV_694033_T_C_9067	-0.157745	6.63825	0.000403226	-0.135515	8.47054e-60	9.90482e-59	FALSE
YDR122W	KIN1	chrIV_694033_T_C_9067	0.199648	7.15209	0.000403226	0.210342	2.50338e-79	3.83762e-78	FALSE
YDR123C	INO2	chrIV_700621_G_C_9073	-0.0514063	1.2301	0.555335	-0.00424705	0.624517	0.689763	FALSE
YDR124W	YDR124W	chrIV_700621_G_C_9073	0.31317	2.4534	0.144335	-0.0227381	0.229454	0.296166	FALSE
YDR125C	ECM18	chrIV_700621_G_C_9073	-0.00239751	1.62053	0.383727	-0.00958126	0.395699	0.472854	FALSE
YDR126W	SWF1	chrIV_703521_G_A_9075	0.0851198	1.70392	0.350796	0.113158	7.46558e-29	4.37828e-28	FALSE
YDR127W	ARO1	chrIV_703521_G_A_9075	0.0377444	2.44656	0.145411	-0.0318999	0.000591415	0.00115063	FALSE
YDR128W	MTC5	chrIV_714933_T_C_9087	-0.0158541	1.12866	0.59963	0.0629074	3.8907e-29	2.30539e-28	FALSE
YDR129C	SAC6	chrIV_714933_T_C_9087	0.00367003	0.281826	0.962942	0.00156867	0.79553	0.835569	FALSE
YDR130C	FIN1	chrIV_714933_T_C_9087	0.00616765	0.164623	0.990337	0.00967451	0.185066	0.245296	FALSE
YDR131C	YDR131C	chrIV_714933_T_C_9087	-0.0308627	0.0952726	0.996553	-0.0173676	0.0239609	0.037733	FALSE
YDR132C	YDR132C	chrIV_722776_A_G_9122	-0.238162	3.3102	0.0417945	-0.168418	7.46386e-49	6.83948e-48	FALSE
YDR133C	YDR133C	chrIV_722776_A_G_9122	0.655104	714.787	0	1.03273	1.11587e-226	7.01159e-225	TRUE
YDR137W	RGP1	chrIV_730734_A_G_9159	-0.0776744	1.996	0.246799	-0.0220737	0.000565641	0.00110311	FALSE
YDR138W	HPR1	chrIV_730734_A_G_9159	0.121918	3.63894	0.0227562	-0.0477847	5.30247e-12	1.77515e-11	FALSE
YDR139C	RUB1	chrIV_733663_C_T_9167	0.107491	5.87744	0.000403226	-0.0523858	3.19328e-12	1.07978e-11	FALSE
YDR140W	MTQ2	chrIV_733663_C_T_9167	-0.0841124	2.11686	0.216745	-0.0589315	1.02336e-17	4.28058e-17	FALSE
YDR143C	SAN1	chrIV_744290_T_C_9206	-0.143441	3.84884	0.0153669	-0.0404094	1.64436e-08	4.6432e-08	FALSE
YDR144C	MKC7	chrIV_744290_T_C_9206	-0.445887	32.1058	0	-0.172426	3.90889e-45	3.30637e-44	FALSE
YDR145W	TAF12	chrIV_748297_T_C_9240	-0.287971	23.6119	0	-0.0871236	7.29625e-38	5.41115e-37	FALSE
YDR146C	SWI5	chrIV_748297_T_C_9240	-0.109307	2.06732	0.229104	0.0213983	0.00390758	0.00687282	FALSE
YDR148C	KGD2	chrIV_755101_T_C_9267	-0.0456654	2.91306	0.0760844	-0.018168	0.200208	0.263473	FALSE
YDR150W	NUM1	chrIV_755101_T_C_9267	0.0421048	2.54816	0.124277	-0.02238	0.0579217	0.0853159	FALSE
YDR151C	CTH1	chrIV_765852_T_C_9302	0.00279145	0.749955	0.776431	-0.0120523	0.0826703	0.118384	FALSE
YDR152W	GIR2	chrIV_765852_T_C_9302	-0.0275522	1.09968	0.611847	0.00119887	0.840711	0.873239	FALSE
YDR154C	YDR154C	chrIV_768037_T_C_9307	0.0422832	5.76393	0.000403226	0.0366831	6.6585e-07	1.6765e-06	FALSE
YDR155C	CPR1	chrIV_768037_T_C_9307	0.044581	2.99315	0.0691076	0.0303	5.83918e-05	0.000125662	FALSE
YDR156W	RPA14	chrIV_770352_C_T_9311	0.0181039	0.860503	0.727111	0.0912323	3.8105e-36	2.68993e-35	FALSE
YDR157W	YDR157W	chrIV_770352_C_T_9311	0.0607083	0.771887	0.768305				FALSE
YDR158W	HOM2	chrIV_770352_C_T_9311	-0.013094	2.45603	0.143841	-0.0413486	7.32942e-12	2.43519e-11	FALSE
YDR159W	SAC3	chrIV_770352_C_T_9311	0.0314668	0.817005	0.746531	-0.00710499	0.211954	0.277271	FALSE
YDR160W	SSY1	chrIV_770352_C_T_9311	0.245946	2.16096	0.206419	-0.00559863	0.418177	0.495675	FALSE
YDR161W	ACL4	chrIV_785712_A_G_9324	-0.146008	9.29446	0	-0.114771	1.51191e-46	1.32391e-45	FALSE
YDR162C	NBP2	chrIV_785712_A_G_9324	0.0176265	0.792248	0.757463	0.00939678	0.188305	0.249228	FALSE
YDR163W	CWC15	chrIV_785712_A_G_9324	-0.037216	0.506678	0.883238	-0.032707	0.000312955	0.000629875	FALSE
YDR164C	SEC1	chrIV_785712_A_G_9324	0.0789328	0.854788	0.729852	-0.0523854	5.19725e-19	2.28423e-18	FALSE
YDR165W	TRM82	chrIV_785712_A_G_9324	0.0598256	2.60548	0.11568	0.0124076	0.202744	0.266442	FALSE
YDR166C	SEC5	chrIV_785712_A_G_9324	-0.123829	3.17454	0.0493614	-0.0241424	0.000190149	0.000390543	FALSE
YDR167W	TAF10	chrIV_785712_A_G_9324	-0.0472273	1.61124	0.387393	-0.00608982	0.213611	0.278765	FALSE
YDR168W	CDC37	chrIV_796104_T_A_9334	-0.0106344	2.50231	0.134852	-0.0315928	3.51776e-05	7.7334e-05	FALSE
YDR169C	STB3	chrIV_796104_T_A_9334	-0.299105	4.9812	0.0017991	-0.101335	5.20218e-23	2.58662e-22	FALSE
YDR170C	SEC7	chrIV_796104_T_A_9334	0.154891	10.9434	0	-0.00772337	0.387205	0.464062	FALSE
YDR173C	ARG82	chrIV_811697_T_C_9345	-0.187546	3.75504	0.0191386	-0.123067	2.17467e-27	1.22149e-26	FALSE
YDR174W	HMO1	chrIV_811697_T_C_9345	-0.00344034	0.664831	0.813862	-0.0100111	0.00759489	0.0128789	FALSE
YDR175C	RSM24	chrIV_811697_T_C_9345	-0.00330381	0.21569	0.980195	-0.00185691	0.847176	0.878359	FALSE
YDR176W	NGG1	chrIV_811697_T_C_9345	-0.0903145	4.51817	0.00475524	-0.0241896	3.49963e-05	7.69946e-05	FALSE
YDR177W	UBC1	chrIV_821485_T_C_9383	0.136968	22.3973	0	0.119849	4.04123e-57	4.39311e-56	FALSE
YDR178W	SDH4	chrIV_821485_T_C_9383	0.189078	4.82049	0.0017991	0.0602964	0.000648216	0.00125225	FALSE
YDR179C	CSN9	chrIV_821485_T_C_9383	0.0217879	4.22945	0.00763158	0.0490816	6.85714e-05	0.000146631	FALSE
YDR179W-A	NVJ3	chrIV_821485_T_C_9383	0.0768554	0.909879	0.699274	0.033583	0.00203764	0.00372481	FALSE
YDR180W	SCC2	chrIV_821485_T_C_9383	0.0128808	1.02371	0.64707	-0.024455	0.00753842	0.0127983	FALSE
YDR181C	SAS4	chrIV_829122_T_C_9405	-0.000798938	3.06742	0.0597216	-0.0404009	4.7587e-10	1.45044e-09	FALSE
YDR182W	CDC1	chrIV_829122_T_C_9405	-0.0542043	2.11611	0.216845	0.00542998	0.332232	0.408714	FALSE
YDR182W-A	YDR182W-A	chrIV_829122_T_C_9405	1.08247	9.21963	0	0.711522	5.9414e-63	7.21294e-62	FALSE
YDR183C-A	YDR183C-A	chrIV_830274_A_T_9407	0.125646	0.989535	0.662379	-0.0172761	0.595998	0.66289	FALSE
YDR183W	PLP1	chrIV_830274_A_T_9407	-0.0142949	1.39971	0.481364	-0.0243279	0.0012675	0.00237469	FALSE
YDR184C	ATC1	chrIV_830274_A_T_9407	-0.0694517	1.54259	0.418204	-0.0068965	0.539767	0.612014	FALSE
YDR185C	UPS3	chrIV_833173_G_T_9417	-0.313193	3.30824	0.0418837	-0.0800417	1.68678e-07	4.43244e-07	FALSE
YDR186C	SND1	chrIV_833173_G_T_9417	0.00238405	0.583783	0.850202	0.0537792	2.87146e-12	9.74422e-12	FALSE
YDR189W	SLY1	chrIV_838720_A_G_9421	-0.00741247	0.807056	0.751464	-0.00798798	0.148103	0.202161	FALSE
YDR190C	RVB1	chrIV_838720_A_G_9421	-0.0159654	0.807326	0.751373	0.00129325	0.756422	0.80354	FALSE
YDR191W	HST4	chrIV_845722_G_A_9437	-0.0332378	1.51219	0.431762	-0.01575	0.0704085	0.102104	FALSE
YDR192C	NUP42	chrIV_845722_G_A_9437	-0.143975	2.37904	0.158469	-0.0718788	2.79897e-28	1.61662e-27	FALSE
YDR194C	MSS116	chrIV_845722_G_A_9437	-0.0395295	0.474918	0.896761	-0.0047207	0.56071	0.631005	FALSE
YDR195W	REF2	chrIV_848316_A_G_9442	0.0427441	0.734961	0.782197	-0.0166745	0.00641353	0.010993	FALSE
YDR196C	CAB5	chrIV_848316_A_G_9442	-0.0124767	0.987624	0.662927	-0.00949667	0.226952	0.293334	FALSE
YDR197W	CBS2	chrIV_848316_A_G_9442	0.0310596	0.284028	0.962428	-0.0191784	0.042408	0.0639476	FALSE
YDR198C	RKM2	chrIV_857627_A_C_9448	0.0483716	1.55121	0.415065	-0.0132381	0.0841756	0.120359	FALSE
YDR200C	VPS64	chrIV_857627_A_C_9448	-0.0173288	1.45597	0.455354	-0.0181193	0.0144462	0.023527	FALSE
YDR201W	SPC19	chrIV_857627_A_C_9448	-0.0303819	1.02664	0.646103	-0.0397344	1.32957e-07	3.52129e-07	FALSE
YDR202C	RAV2	chrIV_857627_A_C_9448	-0.0384353	0.364654	0.937886	-0.0077369	0.380401	0.458115	FALSE
YDR204W	COQ4	chrIV_859173_C_A_9450	0.2465	16.0236	0	0.0167614	0.114249	0.159452	FALSE
YDR205W	MSC2	chrIV_859173_C_A_9450	-0.0299484	1.63598	0.3788	0.0350762	4.1212e-07	1.0572e-06	FALSE
YDR206W	EBS1	chrIV_862580_T_G_9455	-0.226595	3.72885	0.0194954	0.0112822	0.0378595	0.0575746	FALSE
YDR207C	UME6	chrIV_862580_T_G_9455	0.0467858	0.81518	0.747558	-0.0481494	9.65179e-10	2.89099e-09	FALSE
YDR208W	MSS4	chrIV_871373_G_A_9493	0.0095452	3.53256	0.0255641	-0.0413575	1.54732e-12	5.31066e-12	TRUE
YDR210W	YDR210W	chrIV_871373_G_A_9493	-0.234125	42.0244	0	-0.267544	1.78955e-87	3.07287e-86	FALSE
YDR213W	UPC2	chrIV_893751_C_G_9523	-0.0887446	2.378	0.158655	-0.0224176	0.0203415	0.0323002	FALSE
YDR214W	AHA1	chrIV_893751_C_G_9523	0.0717054	4.40706	0.00596206	0.0430287	9.56585e-06	2.21627e-05	FALSE
YDR217C	RAD9	chrIV_893751_C_G_9523	-0.0409648	2.41736	0.150089	-0.00299148	0.656313	0.71934	FALSE
YDR218C	SPR28	chrIV_909447_T_A_9534	0.283045	2.91649	0.07588				FALSE
YDR219C	MFB1	chrIV_909447_T_A_9534	0.0169102	1.65997	0.369586	-0.00564366	0.475786	0.550495	FALSE
YDR221W	GTB1	chrIV_909447_T_A_9534	0.0132584	1.7863	0.318982	-0.0272778	5.28116e-05	0.000114299	FALSE
YDR222W	YDR222W	chrIV_910688_T_C_9535	0.0995026	0.675779	0.809445	0.0168359	0.458192	0.534157	FALSE
YDR223W	CRF1	chrIV_910688_T_C_9535	0.00534894	1.4406	0.462377	-0.110161	3.41275e-07	8.80998e-07	FALSE
YDR224C	HTB1	chrIV_910688_T_C_9535	-0.00999384	0.577617	0.852268	-0.0190174	0.00695707	0.0118748	FALSE
YDR225W	HTA1	chrIV_910688_T_C_9535	-0.00874632	0.281792	0.96295	-0.023698	0.00344747	0.00610299	FALSE
YDR226W	ADK1	chrIV_910688_T_C_9535	-0.00983669	0.795929	0.755745	0.0037971	0.377161	0.454597	FALSE
YDR227W	SIR4	chrIV_923675_A_G_9538	-0.112521	1.87799	0.287462	0.00519683	0.426702	0.504595	FALSE
YDR228C	PCF11	chrIV_923675_A_G_9538	0.102188	1.59335	0.395724	-0.00787064	0.239911	0.307857	FALSE
YDR229W	IVY1	chrIV_926405_G_A_9539	-0.0336625	0.807685	0.751252	-0.00600418	0.434727	0.512636	FALSE
YDR231C	COX20	chrIV_926405_G_A_9539	0.0601126	4.38483	0.00635152	0.0970898	9.63611e-15	3.65865e-14	FALSE
YDR235W	PRP42	chrIV_935079_G_C_9573	0.0280498	0.363771	0.938161	-0.035703	1.11827e-05	2.57153e-05	FALSE
YDR236C	FMN1	chrIV_935079_G_C_9573	0.001099	0.339389	0.94364	0.0265279	9.84193e-05	0.000207814	FALSE
YDR239C	YDR239C	chrIV_941063_T_C_9597	0.0115142	0.807309	0.751379	0.0340445	4.43089e-10	1.35269e-09	FALSE
YDR240C	SNU56	chrIV_941063_T_C_9597	-0.0045935	1.00309	0.657932	0.00362858	0.534378	0.606867	FALSE
YDR242W	AMD2	chrIV_948413_A_G_9603	-0.154472	2.80516	0.0864711	-0.0148564	0.111159	0.155519	FALSE
YDR243C	PRP28	chrIV_948413_A_G_9603	0.0120143	1.54203	0.418397	-0.0365199	9.64845e-07	2.40601e-06	FALSE
YDR244W	PEX5	chrIV_948413_A_G_9603	-0.0267399	0.359341	0.939474	-0.0164452	0.025146	0.0394255	FALSE
YDR245W	MNN10	chrIV_955222_C_T_9609	-0.00581795	1.30852	0.520404	0.000645676	0.89626	0.918426	FALSE
YDR246W	TRS23	chrIV_955222_C_T_9609	-0.0615136	1.69941	0.35217	-0.00059984	0.948526	0.959772	FALSE
YDR247W	VHS1	chrIV_956734_G_A_9613	0.019183	2.29699	0.174245	0.0889971	3.80453e-08	1.04588e-07	FALSE
YDR248C	YDR248C	chrIV_956734_G_A_9613	0.00577725	1.28806	0.529546	0.0530362	3.75165e-05	8.21599e-05	FALSE
YDR251W	PAM1	chrIV_963941_A_G_9634	-0.0496403	1.2047	0.569598	-0.0348172	0.000255882	0.000518659	FALSE
YDR252W	BTT1	chrIV_963941_A_G_9634	-0.243679	4.10784	0.00852959	-0.0349677	0.0129819	0.0213	FALSE
YDR253C	MET32	chrIV_963941_A_G_9634	-0.134108	6.65456	0.000403226	-0.0404117	0.0108921	0.0180473	FALSE
YDR254W	CHL4	chrIV_963941_A_G_9634	-0.0140028	1.31438	0.517855	0.0383138	0.000148911	0.000308504	FALSE
YDR255C	RMD5	chrIV_969630_T_C_9641	0.0504472	0.462523	0.902234	0.0462865	0.000838644	0.00160112	FALSE
YDR257C	RKM4	chrIV_969630_T_C_9641	-0.0257738	0.815042	0.747635	0.0211254	0.00241558	0.00437652	FALSE
YDR258C	HSP78	chrIV_975090_A_G_9651	0.0237828	0.99426	0.661123	-0.080111	0.000451706	0.000891869	FALSE
YDR259C	YAP6	chrIV_975090_A_G_9651	-0.0336174	1.79289	0.316736	0.52307	2.3499e-178	1.0336e-176	FALSE
YDR260C	SWM1	chrIV_975090_A_G_9651	-0.0202576	0.555595	0.863164	-0.0227353	0.00746371	0.0126769	FALSE
YDR261C	EXG2	chrIV_975090_A_G_9651	-0.014341	0.427395	0.915954	-0.0110425	0.197493	0.260199	FALSE
YDR262W	YDR262W	chrIV_996583_G_A_9680	-0.319705	34.0342	0	-0.173446	1.03875e-71	1.44515e-70	FALSE
YDR263C	DIN7	chrIV_996583_G_A_9680	-0.436038	14.4345	0	-0.222151	2.03508e-80	3.21452e-79	FALSE
YDR264C	AKR1	chrIV_996583_G_A_9680	-0.765347	301.468	0	-0.57806	0	0	TRUE
YDR265W	PEX10	chrIV_996583_G_A_9680	-0.48723	39.948	0	-0.278539	1.41159e-149	4.776e-148	FALSE
YDR266C	HEL2	chrIV_1004080_T_G_9686	-0.0640843	1.89845	0.280199	0.0123252	0.0210991	0.0334566	FALSE
YDR267C	CIA1	chrIV_1004080_T_G_9686	0.0117721	0.752797	0.775246	-0.0015085	0.772927	0.817104	FALSE
YDR268W	MSW1	chrIV_1004080_T_G_9686	-0.06266	0.744512	0.778122	-0.0559268	3.05438e-15	1.17688e-14	FALSE
YDR270W	CCC2	chrIV_1008697_G_A_9689	-0.0571231	3.03784	0.0633638	0.0250385	0.0579483	0.0853331	FALSE
YDR272W	GLO2	chrIV_1008697_G_A_9689	-0.135472	10.8384	0	-0.147414	1.02382e-46	8.99261e-46	FALSE
YDR275W	BSC2	chrIV_1013236_A_T_9695	-0.0831512	1.63562	0.378898	-0.0363473	0.000597786	0.00116145	FALSE
YDR276C	PMP3	chrIV_1013236_A_T_9695	-0.0124297	3.462	0.030353	-0.0642853	2.2084e-16	8.88019e-16	FALSE
YDR277C	MTH1	chrIV_1013236_A_T_9695	-0.110084	1.30777	0.520722	-0.0511903	0.0454544	0.0681995	FALSE
YDR278C	YDR278C	chrIV_1013236_A_T_9695	0.00654904	1.08604	0.618392				FALSE
YDR279W	RNH202	chrIV_1022417_A_G_9713	0.0411746	0.523855	0.876804	0.0145069	0.0305503	0.0471616	FALSE
YDR280W	RRP45	chrIV_1022417_A_G_9713	0.00270075	1.5472	0.416624	0.000587106	0.921994	0.938405	FALSE
YDR281C	PHM6	chrIV_1022417_A_G_9713	-0.00230737	1.10642	0.609014	0.06943	0.0351249	0.0536586	FALSE
YDR282C	MRX10	chrIV_1022417_A_G_9713	-0.117024	0.96544	0.672944	0.00921211	0.372629	0.449798	FALSE
YDR283C	GCN2	chrIV_1026744_T_C_9715	0.017509	0.246971	0.971459	0.0345596	6.03895e-06	1.42043e-05	FALSE
YDR284C	DPP1	chrIV_1026744_T_C_9715	-0.00689898	0.914098	0.697057	0.0208634	0.0116855	0.0192724	FALSE
YDR285W	ZIP1	chrIV_1036857_G_C_9719	0.00138966	1.84052	0.301547	0.000599039	0.957901	0.967375	FALSE
YDR286C	YDR286C	chrIV_1036857_G_C_9719	-0.0216346	0.282531	0.962777	0.00461593	0.660313	0.722063	FALSE
YDR287W	INM2	chrIV_1036857_G_C_9719	0.0248293	0.203096	0.983468	-0.00770227	0.339592	0.416522	FALSE
YDR288W	NSE3	chrIV_1036857_G_C_9719	-0.0438238	0.644655	0.823459	0.0494577	1.23933e-12	4.28446e-12	FALSE
YDR289C	RTT103	chrIV_1036857_G_C_9719	0.0555663	0.591257	0.847745	0.0328342	1.10717e-05	2.54761e-05	FALSE
YDR291W	HRQ1	chrIV_1045331_A_G_9730	-0.0880593	1.5944	0.395188	-0.0299152	1.08972e-07	2.90761e-07	FALSE
YDR292C	SRP101	chrIV_1045331_A_G_9730	-0.00447434	0.132486	0.993517	0.00280221	0.588334	0.655897	FALSE
YDR293C	SSD1	chrIV_1045331_A_G_9730	-0.0252658	1.39316	0.484579	0.0107209	0.350617	0.427469	FALSE
YDR294C	DPL1	chrIV_1056052_A_G_9774	-0.113171	4.23136	0.00763158	-0.0804585	1.17352e-36	8.45109e-36	FALSE
YDR295C	HDA2	chrIV_1056052_A_G_9774	0.345431	19.9747	0	0.0597264	2.69474e-23	1.35162e-22	FALSE
YDR296W	MHR1	chrIV_1056052_A_G_9774	-0.0353786	2.04557	0.233805	0.00152567	0.860576	0.88935	FALSE
YDR299W	BFR2	chrIV_1062037_C_T_9819	-0.0200873	0.229182	0.977393	0.00563731	0.574604	0.643098	FALSE
YDR300C	PRO1	chrIV_1062037_C_T_9819	-0.0929406	2.95669	0.0740839	-0.00637035	0.288398	0.361136	FALSE
YDR301W	CFT1	chrIV_1064285_G_A_9821	-0.0182557	0.29543	0.959125	0.0121649	0.0767581	0.110249	FALSE
YDR302W	GPI11	chrIV_1064285_G_A_9821	0.0377053	0.516803	0.8794	0.0104391	0.199179	0.26224	FALSE
YDR303C	RSC3	chrIV_1072962_G_A_9831	0.0251859	1.59924	0.392726	0.0162968	0.0161788	0.0261034	FALSE
YDR304C	CPR5	chrIV_1072962_G_A_9831	-0.0596181	4.20697	0.00767106	-0.0295942	6.21258e-07	1.56767e-06	FALSE
YDR305C	HNT2	chrIV_1072962_G_A_9831	0.0142495	1.13959	0.593167	0.0265122	0.00066254	0.00127728	FALSE
YDR306C	YDR306C	chrIV_1072962_G_A_9831	0.0191554	0.416325	0.919101	0.0250327	0.00538026	0.00931969	FALSE
YDR307W	PMT7	chrIV_1077851_T_C_9833	0.0995601	2.18318	0.200543	0.0823015	5.85278e-24	2.99876e-23	FALSE
YDR308C	SRB7	chrIV_1077851_T_C_9833	0.0203505	1.45484	0.455888	0.0116375	0.179094	0.238652	FALSE
YDR309C	GIC2	chrIV_1077851_T_C_9833	-0.2526	14.2515	0	-0.0336335	0.00116632	0.00219665	FALSE
YDR310C	SUM1	chrIV_1077851_T_C_9833	-0.0389407	1.60848	0.388566	-0.0261686	0.00023624	0.000480036	FALSE
YDR311W	TFB1	chrIV_1077851_T_C_9833	0.0440897	1.56484	0.408433	0.00338654	0.577274	0.645581	FALSE
YDR312W	SSF2	chrIV_1077851_T_C_9833	0.0344938	0.762618	0.771426	0.0102779	0.189847	0.250993	FALSE
YDR313C	PIB1	chrIV_1077851_T_C_9833	0.0194431	0.770591	0.768892	0.0228627	0.0225817	0.0356298	FALSE
YDR314C	RAD34	chrIV_1104470_C_T_9875	0.0601832	0.327082	0.947332	8.16012e-05	0.993542	0.994586	FALSE
YDR315C	IPK1	chrIV_1104470_C_T_9875	0.0065765	0.539454	0.87051	0.0130474	0.212354	0.277604	FALSE
YDR316W	OMS1	chrIV_1104470_C_T_9875	-0.058817	0.766105	0.770355	0.0233138	0.027547	0.0429076	FALSE
YDR317W	HIM1	chrIV_1104470_C_T_9875	-1.87656	23.1427	0				FALSE
YDR318W	MCM21	chrIV_1104470_C_T_9875	0.0920989	3.01393	0.0668127	-0.0362282	1.18368e-05	2.71273e-05	FALSE
YDR321W	ASP1	chrIV_1109736_A_C_9902	-0.131671	13.0551	0	-0.0731177	2.78301e-20	1.2751e-19	FALSE
YDR322C-A	TIM11	chrIV_1112991_G_A_9911	0.00456479	0.775696	0.766579	-0.00336526	0.708771	0.763374	FALSE
YDR322W	MRPL35	chrIV_1109736_A_C_9902	0.0499202	0.827296	0.744649	-0.00454293	0.653693	0.717019	FALSE
YDR323C	PEP7	chrIV_1112991_G_A_9911	0.0567118	0.625699	0.831859	0.064349	1.30395e-13	4.71601e-13	FALSE
YDR324C	UTP4	chrIV_1112991_G_A_9911	-0.000300919	0.926544	0.691452	-0.0110718	0.283293	0.355938	FALSE
YDR325W	YCG1	chrIV_1112991_G_A_9911	0.02124	0.703541	0.798213	0.00655741	0.262637	0.332984	FALSE
YDR326C	YSP2	chrIV_1127544_C_G_9927	-0.0304119	1.91911	0.2741	0.009999	0.193705	0.25562	FALSE
YDR328C	SKP1	chrIV_1127544_C_G_9927	-0.0289806	1.405	0.479312	0.009345	0.124404	0.171988	FALSE
YDR329C	PEX3	chrIV_1127544_C_G_9927	-0.0288823	0.32895	0.946824	-0.0136485	0.0558383	0.0824808	FALSE
YDR330W	UBX5	chrIV_1127544_C_G_9927	-0.0304677	2.24893	0.186374	-0.00536245	0.59893	0.665116	FALSE
YDR331W	GPI8	chrIV_1130624_A_G_9931	-0.0217952	0.755361	0.774172	0.0310427	9.08564e-08	2.43676e-07	FALSE
YDR332W	IRC3	chrIV_1130624_A_G_9931	0.0246472	1.14333	0.591496	0.0130414	0.0569834	0.0840854	FALSE
YDR333C	RQC1	chrIV_1135023_T_C_9933	-0.0260075	0.776908	0.76603	0.0298968	4.48612e-12	1.50803e-11	FALSE
YDR334W	SWR1	chrIV_1135023_T_C_9933	-0.0225201	0.570442	0.854923	0.00887357	0.210515	0.275578	FALSE
YDR335W	MSN5	chrIV_1144484_C_T_9941	-0.0585854	1.58952	0.397628	-0.00743964	0.245059	0.313619	FALSE
YDR336W	MRX8	chrIV_1144484_C_T_9941	0.00810096	1.60677	0.389324	0.0123763	0.0926001	0.131517	FALSE
YDR337W	MRPS28	chrIV_1144484_C_T_9941	0.084342	1.82085	0.307397	0.011671	0.227695	0.294161	FALSE
YDR338C	YDR338C	chrIV_1144484_C_T_9941	0.0489757	2.55173	0.123731	0.0440303	2.16309e-10	6.73302e-10	FALSE
YDR339C	FCF1	chrIV_1152431_T_A_9956	0.0474717	2.02332	0.239869	0.0902741	1.85259e-41	1.4591e-40	FALSE
YDR340W	YDR340W	chrIV_1152431_T_A_9956	0.374866	1.83349	0.303415	0.0478043	0.055113	0.0814726	FALSE
YDR341C	YDR341C	chrIV_1152431_T_A_9956	0.117005	11.8245	0	0.0711987	1.2593e-39	9.56269e-39	FALSE
YDR342C	HXT7	chrIV_1154405_A_G_9958	0.0834667	2.15305	0.206965	-0.122132	0.000327724	0.000657979	FALSE
YDR343C	HXT6	chrIV_1154405_A_G_9958	0.120595	0.827521	0.744643	-0.00527366	0.90201	0.92283	FALSE
YDR345C	HXT3	chrIV_1154405_A_G_9958	0.00755781	0.80807	0.751122	0.0156196	0.468322	0.544134	FALSE
YDR346C	SVF1	chrIV_1154405_A_G_9958	0.0240117	3.27561	0.0432198	0.0056002	0.377924	0.455229	FALSE
YDR347W	MRP1	chrIV_1182098_T_C_10021	-0.00200461	0.34359	0.942721	0.0112957	0.210839	0.275876	FALSE
YDR348C	PAL1	chrIV_1182098_T_C_10021	0.00111852	2.43166	0.147104	0.00468717	0.44456	0.521649	FALSE
YDR349C	YPS7	chrIV_1182098_T_C_10021	0.0283035	0.590417	0.848087	0.0494909	5.05133e-31	3.14293e-30	FALSE
YDR350C	ATP22	chrIV_1182098_T_C_10021	0.0331026	1.33353	0.510485	-0.0216036	0.000989007	0.00187318	FALSE
YDR351W	SBE2	chrIV_1182098_T_C_10021	-0.0888131	2.36654	0.160561	-0.0412441	1.38333e-13	4.99363e-13	FALSE
YDR352W	YPQ2	chrIV_1182098_T_C_10021	-0.0906267	1.74837	0.334982	-0.0523183	4.34457e-20	1.97631e-19	FALSE
YDR353W	TRR1	chrIV_1182098_T_C_10021	-0.0189502	1.55625	0.412586	0.00306864	0.470941	0.546104	FALSE
YDR354W	TRP4	chrIV_1182098_T_C_10021	-0.175148	15.1156	0	-0.0413831	3.70377e-10	1.13373e-09	FALSE
YDR356W	SPC110	chrIV_1189130_C_T_10033	0.0844082	1.63254	0.379723	0.0569614	2.52281e-13	8.97104e-13	FALSE
YDR357C	CNL1	chrIV_1189130_C_T_10033	-0.320392	40.6011	0	-0.279304	9.4997e-99	1.89266e-97	FALSE
YDR358W	GGA1	chrIV_1189130_C_T_10033	-0.00549072	0.181284	0.988111	-0.003432	0.840291	0.872998	FALSE
YDR359C	EAF1	chrIV_1189130_C_T_10033	0.10365	1.23294	0.554141	0.00251742	0.757678	0.804681	FALSE
YDR361C	BCP1	chrIV_1201621_C_T_10041	-0.00285574	0.198709	0.984604	-0.000385052	0.962206	0.970865	FALSE
YDR362C	TFC6	chrIV_1201621_C_T_10041	0.0142771	0.322684	0.948527	0.00842608	0.172212	0.230665	FALSE
YDR363W	ESC2	chrIV_1201621_C_T_10041	0.178058	1.70557	0.350337	0.0321655	2.49829e-05	5.56496e-05	FALSE
YDR363W-A	SEM1	chrIV_1201621_C_T_10041	0.00542374	0.576953	0.852513	-0.00572656	0.542222	0.614433	FALSE
YDR364C	CDC40	chrIV_1201621_C_T_10041	0.0138166	0.992385	0.661617	0.00240258	0.704951	0.760263	FALSE
YDR365C	ESF1	chrIV_1201621_C_T_10041	-0.275068	30.489	0	-0.115528	2.5315e-37	1.85341e-36	FALSE
YDR366C	YDR366C	chrIV_1213560_G_A_10056	-0.352221	16.4373	0	-0.134084	2.92089e-17	1.20416e-16	FALSE
YDR367W	KEI1	chrIV_1213560_G_A_10056	0.289922	45.1941	0	0.194524	2.81106e-124	7.40721e-123	FALSE
YDR368W	YPR1	chrIV_1215342_C_A_10057	-0.000654453	0.482096	0.893512	-0.0340927	3.23404e-06	7.74707e-06	FALSE
YDR369C	XRS2	chrIV_1215342_C_A_10057	-0.00413867	1.9828	0.250122	-0.00313722	0.713563	0.76709	FALSE
YDR370C	DXO1	chrIV_1221065_G_A_10066	-0.0429532	0.894221	0.708676	-0.00056595	0.93037	0.945174	FALSE
YDR371W	CTS2	chrIV_1221065_G_A_10066	0.0506385	0.45625	0.9046	0.0587171	1.26827e-09	3.78297e-09	FALSE
YDR372C	VPS74	chrIV_1221065_G_A_10066	0.0172314	1.12761	0.599929	-0.0588835	7.10421e-31	4.40107e-30	FALSE
YDR374W-A	WIP1	chrIV_1225163_C_T_10073	0.0199177	2.50215	0.134886	-0.0586157	6.01315e-07	1.51936e-06	FALSE
YDR375C	BCS1	chrIV_1225163_C_T_10073	-0.102742	1.91302	0.275512	0.0337397	0.000396746	0.000788253	FALSE
YDR376W	ARH1	chrIV_1225163_C_T_10073	0.0666379	0.767035	0.77007	-0.0076615	0.251547	0.321131	FALSE
YDR377W	ATP17	chrIV_1225163_C_T_10073	0.0193445	1.15253	0.587681	0.0217233	0.0122793	0.0201994	FALSE
YDR378C	LSM6	chrIV_1225163_C_T_10073	0.0217687	0.675441	0.80957	0.0996432	1.93542e-47	1.72111e-46	FALSE
YDR379C-A	SDH6	chrIV_1235582_G_A_10080	0.0262952	1.22796	0.55674	0.0125046	0.483805	0.558304	FALSE
YDR379W	RGA2	chrIV_1235582_G_A_10080	0.0516113	0.889751	0.711667	0.0146248	0.0425138	0.0640902	FALSE
YDR381C-A	YDR381C-A	chrIV_1240175_G_A_10092	-0.0152754	0.847794	0.733278	0.0320255	0.0114601	0.018928	FALSE
YDR381W	YRA1	chrIV_1235582_G_A_10080	-0.00500769	0.43375	0.913818	-0.00211095	0.632682	0.697181	FALSE
YDR382W	RPP2B	chrIV_1240175_G_A_10092	-0.00791118	1.73493	0.340534	-0.0196158	0.0152936	0.0248293	FALSE
YDR383C	NKP1	chrIV_1240175_G_A_10092	0.0595126	1.15966	0.58489	0.00134634	0.862084	0.890265	FALSE
YDR384C	ATO3	chrIV_1240175_G_A_10092	0.101184	3.74523	0.0194444	0.0547769	6.08601e-06	1.43091e-05	FALSE
YDR385W	EFT2	chrIV_1248530_C_G_10105	0.00740055	0.521311	0.877787	-0.0984018	1.44864e-11	4.75505e-11	FALSE
YDR386W	MUS81	chrIV_1248530_C_G_10105	-0.0417496	1.14392	0.591248	0.00954849	0.180115	0.239623	FALSE
YDR387C	CIN10	chrIV_1248530_C_G_10105	-0.0458588	1.50578	0.433266	0.00959317	0.215923	0.281241	FALSE
YDR390C	UBA2	chrIV_1257382_G_A_10113	0.0529209	0.510575	0.881556	0.00781222	0.124804	0.172458	FALSE
YDR391C	YDR391C	chrIV_1257382_G_A_10113	0.097657	2.73252	0.0952363	-0.0422412	0.00153175	0.00284184	FALSE
YDR392W	SPT3	chrIV_1259337_C_T_10115	0.0257264	0.529963	0.874444	0.00677375	0.334937	0.411423	FALSE
YDR393W	SHE9	chrIV_1259337_C_T_10115	0.0426859	1.27442	0.53437	0.0459182	1.05731e-09	3.16197e-09	FALSE
YDR394W	RPT3	chrIV_1263265_T_G_10121	0.0279007	1.17724	0.577971	0.00116252	0.81656	0.852335	FALSE
YDR395W	SXM1	chrIV_1263265_T_G_10121	0.0579714	1.0102	0.654063	0.037674	2.6335e-07	6.83228e-07	FALSE
YDR398W	UTP5	chrIV_1270033_C_T_10132	-0.0235706	0.958713	0.676268	0.013384	0.169461	0.227466	FALSE
YDR399W	HPT1	chrIV_1270033_C_T_10132	-0.105519	15.5938	0	-0.137941	1.23322e-52	1.22635e-51	FALSE
YDR403W	DIT1	chrIV_1276608_A_G_10178	0.116648	0.493633	0.888996	0.164638	3.80859e-21	1.79535e-20	FALSE
YDR404C	RPB7	chrIV_1276608_A_G_10178	0.0142983	1.05467	0.634483	-0.065609	6.55209e-35	4.51384e-34	FALSE
YDR407C	TRS120	chrIV_1290073_A_C_10200	0.0396141	0.662773	0.814764	0.00176264	0.767071	0.812394	FALSE
YDR408C	ADE8	chrIV_1290073_A_C_10200	-0.000372585	0.690015	0.804213	0.000686892	0.915024	0.932639	FALSE
YDR409W	SIZ1	chrIV_1290073_A_C_10200	-0.104689	1.14353	0.591413	-0.00851145	0.164749	0.221877	FALSE
YDR410C	STE14	chrIV_1292515_G_C_10203	0.0550365	2.25488	0.185541	-0.0107158	0.212199	0.277465	FALSE
YDR411C	DFM1	chrIV_1292515_G_C_10203	-0.0481637	1.05969	0.632445	-0.0116816	0.232398	0.299358	FALSE
YDR412W	RRP17	chrIV_1296240_G_A_10204	0.027244	0.991684	0.661801	0.00688482	0.384972	0.46198	FALSE
YDR414C	ERD1	chrIV_1296240_G_A_10204	0.0448698	0.694154	0.802345	0.00925547	0.182607	0.242454	FALSE
YDR415C	YDR415C	chrIV_1298073_C_T_10205	-0.0638568	0.769308	0.769373	-0.024769	3.07374e-05	6.80171e-05	FALSE
YDR416W	SYF1	chrIV_1298073_C_T_10205	0.0490216	1.10668	0.608906	0.00362671	0.456267	0.532326	FALSE
YDR418W	RPL12B	chrIV_1302530_T_C_10206	-0.00117332	0.908616	0.699968	0.000789641	0.892932	0.916243	FALSE
YDR419W	RAD30	chrIV_1302530_T_C_10206	0.113251	0.778602	0.765263	0.00811785	0.232181	0.299147	FALSE
YDR420W	HKR1	chrIV_1302530_T_C_10206	-0.0817499	1.5023	0.434149	-0.0185044	0.0836339	0.119674	FALSE
YDR421W	ARO80	chrIV_1317903_G_C_10219	-0.0809064	1.15963	0.584901	-0.0503213	1.80698e-11	5.90081e-11	FALSE
YDR422C	SIP1	chrIV_1317903_G_C_10219	-0.0577751	0.68376	0.806499	0.0616356	2.56836e-21	1.21774e-20	FALSE
YDR423C	CAD1	chrIV_1317903_G_C_10219	-1.9046	532.502	0	-0.481712	1.94809e-261	1.61437e-259	FALSE
YDR424C	DYN2	chrIV_1320900_C_T_10225	-0.00426379	0.638384	0.826121	0.00162455	0.819794	0.855086	FALSE
YDR425W	SNX41	chrIV_1320900_C_T_10225	0.145784	1.83462	0.303115	-0.0137824	0.180412	0.239937	FALSE
YDR427W	RPN9	chrIV_1320900_C_T_10225	0.0187323	0.577736	0.852224	-0.00566237	0.485195	0.559593	FALSE
YDR428C	BNA7	chrIV_1320900_C_T_10225	-0.0178395	1.6774	0.362727	0.00482985	0.498765	0.572563	FALSE
YDR429C	TIF35	chrIV_1320900_C_T_10225	-0.00256473	0.974057	0.668372	0.000596656	0.902969	0.923435	FALSE
YDR430C	CYM1	chrIV_1331502_G_A_10232	-0.00989749	0.65414	0.819133	-0.00495497	0.592551	0.659569	FALSE
YDR432W	NPL3	chrIV_1331502_G_A_10232	-0.171049	0.474084	0.897166	0.0535854	4.76363e-07	1.216e-06	FALSE
YDR433W	YDR433W	chrIV_1331502_G_A_10232	0.234435	7.35633	0.000403226	0.0493014	1.07844e-12	3.73729e-12	FALSE
YDR434W	GPI17	chrIV_1331502_G_A_10232	0.0397065	1.5794	0.40184	0.00411754	0.502941	0.576568	FALSE
YDR435C	PPM1	chrIV_1331502_G_A_10232	0.0269534	2.1615	0.206292	-0.00668886	0.543467	0.615477	FALSE
YDR441C	APT2	chrIV_1344556_C_T_10260	0.017463	2.28834	0.175701	-0.395371	6.93413e-134	2.01266e-132	FALSE
YDR443C	SSN2	chrIV_1344556_C_T_10260	0.305257	4.81171	0.0017991	0.283116	2.04252e-151	6.9935e-150	FALSE
YDR444W	YDR444W	chrIV_1352371_G_C_10276	0.152506	4.63466	0.0039886	0.157649	8.1529e-132	2.31932e-130	FALSE
YDR447C	RPS17B	chrIV_1352371_G_C_10276	-0.0112677	1.70684	0.349983	-0.0359801	1.58958e-05	3.59257e-05	FALSE
YDR448W	ADA2	chrIV_1361031_A_G_10294	0.0685065	0.573258	0.853881	-0.0707991	2.48e-24	1.28448e-23	FALSE
YDR449C	UTP6	chrIV_1361031_A_G_10294	-0.0517667	1.94809	0.262859	-0.00880442	0.384983	0.46198	FALSE
YDR450W	RPS18A	chrIV_1361031_A_G_10294	0.000165948	0.498223	0.886994	0.0104734	0.160513	0.216925	FALSE
YDR451C	YHP1	chrIV_1361031_A_G_10294	-0.24072	19.4377	0	-0.269429	3.31649e-138	1.00337e-136	TRUE
YDR452W	PPN1	chrIV_1364702_G_A_10297	-0.0185077	2.46397	0.14249	-0.035009	6.86748e-07	1.7276e-06	FALSE
YDR453C	TSA2	chrIV_1364702_G_A_10297	0.00891156	0.976684	0.666932	-0.0670228	0.000433976	0.000858345	FALSE
YDR454C	GUK1	chrIV_1366750_G_A_10301	-0.0135887	0.716631	0.791836	0.00318694	0.518886	0.59245	FALSE
YDR456W	NHX1	chrIV_1366750_G_A_10301	0.0704665	3.03027	0.0642218	0.0198828	0.00125126	0.00234581	FALSE
YDR457W	TOM1	chrIV_1366750_G_A_10301	-0.0026287	0.488909	0.890984	0.0290457	0.00346984	0.00614068	FALSE
YDR458C	HEH2	chrIV_1385323_C_T_10333	-0.000888188	0.275366	0.964616	0.0245089	0.000760873	0.00145898	FALSE
YDR459C	PFA5	chrIV_1385323_C_T_10333	0.0352307	0.526411	0.875817	-0.000852415	0.902183	0.922841	FALSE
YDR460W	TFB3	chrIV_1385323_C_T_10333	-0.00475955	1.69231	0.355541	0.00164401	0.840325	0.872998	FALSE
YDR461C-A	YDR461C-A	chrIV_1385323_C_T_10333	-0.0873603	2.10567	0.219006	-0.0736562	0.00045117	0.000891119	FALSE
YDR461W	MFA1	chrIV_1385323_C_T_10333	-0.380595	57.9468	0	-2.25676	2.32998e-85	3.93003e-84	FALSE
YDR462W	MRPL28	chrIV_1386851_T_C_10335	-0.0160114	0.597692	0.845123	0.00942884	0.341838	0.418768	FALSE
YDR463W	STP1	chrIV_1386851_T_C_10335	-0.0649841	1.58833	0.398121	-0.0214038	0.000587215	0.00114324	FALSE
YDR464W	SPP41	chrIV_1394087_C_T_10347	0.0211769	1.2982	0.524912	0.00398938	0.612914	0.679063	FALSE
YDR465C	RMT2	chrIV_1394087_C_T_10347	-0.00235804	0.924695	0.692161	-0.0236327	0.0141253	0.0230635	FALSE
YDR466W	PKH3	chrIV_1398006_G_A_10348	-0.00860312	0.317026	0.950326	0.00444615	0.531945	0.604675	FALSE
YDR468C	TLG1	chrIV_1398006_G_A_10348	0.00236331	0.455045	0.905026	-0.0557943	3.2603e-13	1.15504e-12	FALSE
YDR469W	SDC1	chrIV_1398006_G_A_10348	-0.0708712	1.47718	0.445087	-0.0675943	3.45042e-18	1.47125e-17	FALSE
YDR470C	UGO1	chrIV_1402695_T_C_10358	-0.00596001	0.31614	0.950645	0.0329123	0.00253334	0.00457538	FALSE
YDR471W	RPL27B	chrIV_1402695_T_C_10358	-0.0149731	1.77525	0.323831	-0.0028886	0.6781	0.737776	FALSE
YDR472W	TRS31	chrIV_1402695_T_C_10358	0.0467202	0.556514	0.862642	0.0337624	2.00055e-09	5.90866e-09	FALSE
YDR473C	PRP3	chrIV_1402695_T_C_10358	0.0438135	0.948925	0.680394	-0.00820536	0.259324	0.329441	FALSE
YDR475C	JIP4	chrIV_1410837_C_T_10391	-0.0794929	1.53847	0.41998	-0.010771	0.289355	0.362201	FALSE
YDR476C	YDR476C	chrIV_1410837_C_T_10391	-0.130619	18.2219	0	-0.0517013	9.63555e-06	2.23061e-05	FALSE
YDR477W	SNF1	chrIV_1410837_C_T_10391	0.0550644	1.80106	0.314433	0.0183445	0.0278641	0.0433543	FALSE
YDR478W	SNM1	chrIV_1416353_A_G_10428	0.530469	33.4015	0	0.218645	1.39108e-107	3.09502e-106	FALSE
YDR479C	PEX29	chrIV_1416353_A_G_10428	0.0290632	0.974911	0.667904	-0.0484264	1.20781e-05	2.76361e-05	FALSE
YDR480W	DIG2	chrIV_1418662_T_C_10440	0.230768	2.46441	0.142423	-0.0379873	2.30471e-05	5.14779e-05	FALSE
YDR481C	PHO8	chrIV_1418662_T_C_10440	0.273368	9.06355	0	-0.00481191	0.560309	0.630741	FALSE
YDR482C	CWC21	chrIV_1420155_T_C_10441	-0.00199358	1.16905	0.580773	-0.000127021	0.987244	0.990535	FALSE
YDR483W	KRE2	chrIV_1420155_T_C_10441	-0.00659208	1.21607	0.564035	-0.00644047	0.161972	0.218529	FALSE
YDR484W	VPS52	chrIV_1425361_T_C_10442	-0.0567456	0.591389	0.847691	-0.0104447	0.220238	0.285885	FALSE
YDR485C	VPS72	chrIV_1425361_T_C_10442	0.0155395	0.223701	0.978498	-0.00244953	0.679317	0.738607	FALSE
YDR486C	VPS60	chrIV_1425361_T_C_10442	0.0486954	1.13768	0.594374	0.0126422	0.139174	0.190748	FALSE
YDR487C	RIB3	chrIV_1430469_A_G_10447	-0.0857554	9.70238	0	-0.115519	2.69631e-90	4.89444e-89	FALSE
YDR488C	PAC11	chrIV_1430469_A_G_10447	-0.0738319	0.98078	0.66489	-0.000333021	0.974134	0.979323	FALSE
YDR489W	SLD5	chrIV_1430469_A_G_10447	0.603067	38.01	0	0.232954	1.18436e-146	3.89205e-145	FALSE
YDR492W	IZH1	chrIV_1435743_G_T_10453	0.0174364	2.41133	0.150803	0.0490569	0.00057145	0.00111293	FALSE
YDR493W	MZM1	chrIV_1435743_G_T_10453	-0.00504812	0.515404	0.879885	0.000547923	0.962586	0.971077	FALSE
YDR494W	RSM28	chrIV_1435743_G_T_10453	-0.0485135	1.7974	0.315494	-0.0103424	0.411369	0.488726	FALSE
YDR495C	VPS3	chrIV_1441031_T_C_10456	0.0731249	1.16268	0.583576	-0.00779149	0.262587	0.332984	FALSE
YDR496C	PUF6	chrIV_1441031_T_C_10456	-0.0288674	1.23051	0.555163	0.00136329	0.899671	0.921426	FALSE
YDR497C	ITR1	chrIV_1446003_A_G_10490	-0.128825	27.829	0	-0.22558	1.06849e-167	4.24278e-166	FALSE
YDR498C	SEC20	chrIV_1446003_A_G_10490	0.130997	3.97476	0.0113302	0.0307077	3.29626e-06	7.8895e-06	FALSE
YDR500C	RPL37B	chrIV_1451277_C_T_10555	-0.0213043	1.59732	0.393703	0.0187138	0.00216605	0.00394317	FALSE
YDR501W	PLM2	chrIV_1451277_C_T_10555	0.0660468	0.450894	0.906494	-0.0170997	0.19283	0.254643	FALSE
YDR502C	SAM2	chrIV_1455713_G_A_10583	0.0781263	6.95294	0.000403226	-0.00379472	0.66724	0.728524	FALSE
YDR503C	LPP1	chrIV_1455713_G_A_10583	0.0924584	2.12243	0.215469	-0.051608	1.627e-05	3.67135e-05	FALSE
YDR504C	SPG3	chrIV_1455920_C_G_10585	-0.0575853	0.513947	0.880389	-0.495998	1.27013e-127	3.49163e-126	FALSE
YDR505C	PSP1	chrIV_1455920_C_G_10585	0.380974	7.92273	0	-0.166337	1.86209e-50	1.77162e-49	FALSE
YDR506C	GMC1	chrIV_1455920_C_G_10585	0.166142	0.558925	0.861274	-0.039552	6.14901e-05	0.000132181	FALSE
YDR511W	SDH7	chrIV_1470400_G_A_10753	-0.0835177	1.6541	0.372368	-0.257129	3.13747e-63	3.82517e-62	FALSE
YDR512C	EMI1	chrIV_1470400_G_A_10753	0.12255	7.11732	0.000403226	0.0586824	4.42624e-08	1.21213e-07	FALSE
YDR517W	GRH1	chrIV_1477505_T_C_10807	0.000130726	1.81297	0.31038	-3.3786e-05	0.995897	0.996343	FALSE
YDR518W	EUG1	chrIV_1477505_T_C_10807	0.0829228	1.83497	0.303024	-0.0133767	0.370264	0.447415	FALSE
YDR519W	FPR2	chrIV_1477505_T_C_10807	-0.0360613	2.93559	0.0750614	-0.0362935	0.00273789	0.0049153	FALSE
YDR520C	URC2	chrIV_1477505_T_C_10807	-0.01663	0.19334	0.985568	-0.0133316	0.0688448	0.100008	FALSE
YDR538W	PAD1	chrIV_1512312_G_A_11059	-0.104185	0.973264	0.668806	0.00893152	0.430593	0.508599	FALSE
YDR539W	FDC1	chrIV_1512312_G_A_11059	0.404504	42.7977	0	0.302563	1.39835e-154	4.93567e-153	TRUE
YEL001C	IRC22	chrV_154915_A_C_11902	0.00401904	1.92831	0.271408	0.00496916	0.439621	0.517446	FALSE
YEL002C	WBP1	chrV_145503_A_G_11900	0.0102441	0.818201	0.745859	0.0071671	0.103914	0.145959	FALSE
YEL003W	GIM4	chrV_145503_A_G_11900	-0.00565163	0.989538	0.662378	-0.00212955	0.81412	0.850254	FALSE
YEL004W	YEA4	chrV_145503_A_G_11900	0.0547424	2.47603	0.139774	-0.0036655	0.715678	0.768353	FALSE
YEL005C	VAB2	chrV_145503_A_G_11900	-0.0388645	2.12367	0.215037	0.0127238	0.244982	0.31359	FALSE
YEL006W	YEA6	chrV_145503_A_G_11900	-0.136833	3.36895	0.0356748	-0.063826	7.95416e-26	4.32337e-25	FALSE
YEL007W	MIT1	chrV_145503_A_G_11900	5.78995e-05	2.89759	0.0775538	0.154451	3.48197e-42	2.7885e-41	FALSE
YEL009C	GCN4	chrV_134626_G_A_11875	-0.0738987	21.2579	0	-0.0674014	1.16554e-34	7.99108e-34	FALSE
YEL011W	GLC3	chrV_134626_G_A_11875	-0.0629209	1.51241	0.431718	0.0522526	0.0611224	0.0897068	FALSE
YEL012W	UBC8	chrV_134626_G_A_11875	-0.0441663	1.01195	0.653033	0.0330297	0.0303434	0.0468801	FALSE
YEL013W	VAC8	chrV_134626_G_A_11875	0.0215942	2.25018	0.186303	0.0116616	0.116486	0.162258	FALSE
YEL015W	EDC3	chrV_124644_T_A_11868	-0.0176517	2.51677	0.132002	0.018591	0.00270773	0.00487034	FALSE
YEL016C	NPP2	chrV_124644_T_A_11868	-0.0536282	1.70308	0.351031	-0.00921824	0.266499	0.337283	FALSE
YEL017C-A	PMP2	chrV_124644_T_A_11868	0.080051	20.2798	0	0.00441568	0.732748	0.782711	FALSE
YEL017W	GTT3	chrV_124644_T_A_11868	-0.237469	18.8238	0	-0.161128	5.95515e-81	9.53825e-80	FALSE
YEL018W	EAF5	chrV_124644_T_A_11868	0.0296886	1.14095	0.592504	-0.00589854	0.313711	0.388604	FALSE
YEL019C	MMS21	chrV_117072_C_T_11858	-0.150245	0.67691	0.809023	0.00387178	0.758538	0.805145	FALSE
YEL020C	PXP1	chrV_117072_C_T_11858	-0.595408	9.09876	0	0.0273977	0.000867836	0.00165465	FALSE
YEL020W-A	TIM9	chrV_117072_C_T_11858	0.0107366	0.802404	0.753035	-0.0306289	2.98619e-05	6.61822e-05	FALSE
YEL021W	URA3	chrV_117072_C_T_11858	-0.038383	1.40678	0.478633	-0.0548565	1.03264e-19	4.64933e-19	FALSE
YEL022W	GEA2	chrV_115692_T_G_11856	-0.0427473	0.747057	0.777332	-0.048037	4.11295e-12	1.38503e-11	FALSE
YEL023C	YEL023C	chrV_115692_T_G_11856	0.0618297	0.592439	0.847263	0.00860033	0.328022	0.404145	FALSE
YEL024W	RIP1	chrV_103136_A_G_11837	0.0247775	1.12266	0.601332	0.0220754	0.326375	0.402548	FALSE
YEL025C	YEL025C	chrV_103136_A_G_11837	-0.086867	0.98751	0.662959	0.0301854	5.24158e-06	1.24002e-05	FALSE
YEL026W	SNU13	chrV_101381_C_G_11836	-0.0128721	2.0384	0.234642	-0.0147511	0.160836	0.217187	FALSE
YEL027W	VMA3	chrV_101381_C_G_11836	0.0219812	5.38263	0.000653595	0.0301467	6.95552e-10	2.09988e-09	FALSE
YEL028W	YEL028W	chrV_101381_C_G_11836	0.404981	3.05891	0.0611959	0.2154	6.28732e-44	5.25598e-43	FALSE
YEL029C	BUD16	chrV_101381_C_G_11836	0.0159967	0.372514	0.935111	0.0333288	8.86511e-08	2.3832e-07	FALSE
YEL030W	ECM10	chrV_90719_C_T_11817	-0.0713263	1.29294	0.527545	-0.00970499	0.332675	0.409171	FALSE
YEL031W	SPF1	chrV_90719_C_T_11817	0.0313267	1.25334	0.545966	0.034354	3.7024e-05	8.11434e-05	FALSE
YEL032W	MCM3	chrV_90719_C_T_11817	-0.0236342	1.64029	0.377622	-0.00235844	0.761012	0.807472	FALSE
YEL033W	MTC7	chrV_85693_T_C_11816	0.024627	1.30227	0.52305	-0.00772642	0.700238	0.756607	FALSE
YEL034W	HYP2	chrV_85693_T_C_11816	-0.0024019	1.23484	0.553342	-0.0140534	0.364887	0.442039	FALSE
YEL041W	YEF1	chrV_76636_G_A_11743	-0.767745	22.9444	0	0.406349	2.71106e-105	5.82776e-104	FALSE
YEL042W	GDA1	chrV_76636_G_A_11743	-0.0297362	0.957392	0.676806	0.00917872	0.177023	0.23639	FALSE
YEL043W	YEL043W	chrV_69813_T_C_11711	0.0275776	0.592934	0.847062	0.0199375	0.00537333	0.00931052	FALSE
YEL044W	IES6	chrV_69813_T_C_11711	0.0071748	0.728204	0.785753	0.0122079	0.0426389	0.0642448	FALSE
YEL045C	YEL045C	chrV_68702_C_G_11710	-0.219886	0.369074	0.936508	0.0100653	0.655669	0.718772	FALSE
YEL046C	GLY1	chrV_68702_C_G_11710	-0.0352469	1.54702	0.416684	-0.00539745	0.624391	0.689763	FALSE
YEL047C	FRD1	chrV_63695_T_C_11702	0.0490773	0.801506	0.753338	0.0136303	0.172201	0.230665	FALSE
YEL048C	TCA17	chrV_63695_T_C_11702	0.0419652	0.162891	0.99045	0.038127	0.004371	0.0076409	FALSE
YEL049W	PAU2	chrV_63695_T_C_11702	0.0195691	1.17893	0.577413	0.244303	2.81128e-13	9.96584e-13	FALSE
YEL061C	CIN8	chrV_36245_T_A_11538	-0.0198964	0.700858	0.799344	-0.00244583	0.764848	0.81094	FALSE
YEL062W	NPR2	chrV_36245_T_A_11538	0.132839	1.90436	0.278138	0.0805821	5.21421e-26	2.85037e-25	FALSE
YER001W	MNN1	chrV_154915_A_C_11902	-0.00506715	0.823208	0.74476	-0.0293306	0.0122523	0.0201607	FALSE
YER002W	NOP16	chrV_154915_A_C_11902	-0.0063753	3.53949	0.02519	-0.0220233	0.00540681	0.00936136	FALSE
YER003C	PMI40	chrV_160010_T_C_11905	-0.000471465	0.762429	0.771484	0.0245412	0.001855	0.00341166	FALSE
YER004W	FMP52	chrV_160010_T_C_11905	0.0174453	0.502114	0.885276	0.0448608	1.77274e-15	6.88157e-15	FALSE
YER007C-A	TMA20	chrV_166422_A_G_11918	0.00281327	1.25377	0.545747	-0.000129857	0.979153	0.98328	FALSE
YER007W	PAC2	chrV_166422_A_G_11918	0.152586	2.14936	0.207282	0.0178455	0.0372339	0.0566987	FALSE
YER009W	NTF2	chrV_173645_C_T_11928	-0.00132444	0.522294	0.877407	0.00291124	0.57007	0.638899	FALSE
YER010C	YER010C	chrV_173645_C_T_11928	0.0125803	1.7598	0.331331	0.0355907	1.18493e-07	3.14405e-07	FALSE
YER012W	PRE1	chrV_178287_T_C_11936	0.00677636	2.09268	0.222668	-0.00801216	0.160809	0.217187	FALSE
YER013W	PRP22	chrV_178287_T_C_11936	-0.103666	1.85573	0.296451	-0.032562	1.26417e-07	3.35121e-07	FALSE
YER022W	SRB4	chrV_200737_C_T_12032	0.125748	2.64747	0.107737	-0.018904	0.000822596	0.00157259	FALSE
YER023W	PRO3	chrV_200737_C_T_12032	-0.0374261	4.2344	0.00763158	-0.0101097	0.0603826	0.0886438	FALSE
YER038C	KRE29	chrV_229119_A_G_12197	0.0843771	0.397796	0.927051	-0.0444194	2.47678e-06	6.00858e-06	FALSE
YER039C	HVG1	chrV_229119_A_G_12197	-0.0111786	0.464061	0.9016	0.137354	3.07624e-23	1.53893e-22	FALSE
YER040W	GLN3	chrV_229119_A_G_12197	0.021924	0.821625	0.744803	0.00255469	0.713819	0.767221	FALSE
YER046W	SPO73	chrV_243791_A_T_12278	-0.128193	6.57625	0.000403226	-0.16972	1.99354e-33	1.31629e-32	FALSE
YER047C	SAP1	chrV_243791_A_T_12278	0.0304582	0.948011	0.680888	0.0425998	3.90595e-08	1.07273e-07	FALSE
YER053C-A	YER053C-A	chrV_263652_T_C_12395	0.0689753	2.76607	0.0916857	0.0416876	0.538178	0.610454	FALSE
YER054C	GIP2	chrV_263652_T_C_12395	-0.220751	3.66262	0.0211607	-0.111232	0.000163907	0.000338469	FALSE
YER057C	HMF1	chrV_272025_C_T_12449	0.00242691	0.3627	0.938495	0.0712654	1.72378e-34	1.1748e-33	FALSE
YER058W	PET117	chrV_272025_C_T_12449	-0.0837207	1.77335	0.324783	0.0270039	0.10142	0.142802	FALSE
YER059W	PCL6	chrV_272025_C_T_12449	0.0108139	3.50468	0.0272385	-0.0145785	0.0656936	0.0958499	FALSE
YER060W	FCY21	chrV_272025_C_T_12449	-0.027429	0.772078	0.768219	-0.0115374	0.545882	0.617478	FALSE
YER060W-A	FCY22	chrV_272025_C_T_12449	-0.00333197	0.237472	0.974799				FALSE
YER061C	CEM1	chrV_283424_T_C_12465	-0.0227651	1.03299	0.643551	0.0109891	0.237808	0.305776	FALSE
YER062C	GPP2	chrV_283424_T_C_12465	-0.0645859	3.11174	0.0547576	0.0127368	0.385293	0.462254	FALSE
YER063W	THO1	chrV_283424_T_C_12465	4.24589e-05	0.706416	0.797001	-0.00402233	0.408195	0.486008	FALSE
YER064C	VHR2	chrV_283424_T_C_12465	0.0255048	0.52934	0.874685	-0.0130983	0.224701	0.290885	FALSE
YER066W	RRT13	chrV_294112_A_G_12486	0.138748	0.825612	0.744695	-0.07235	2.58939e-06	6.26053e-06	FALSE
YER067W	RGI1	chrV_294112_A_G_12486	0.0477091	1.34704	0.50431	0.0102166	0.742964	0.791849	FALSE
YER068W	MOT2	chrV_294112_A_G_12486	-0.00910898	0.501876	0.885382	-0.00456161	0.435592	0.513338	FALSE
YER069W	ARG5,6	chrV_294112_A_G_12486	-0.00956882	1.46981	0.449449	0.00827475	0.500565	0.5744	FALSE
YER070W	RNR1	chrV_302655_T_C_12493	-0.102467	3.83309	0.0157904	-0.0843839	7.25648e-12	2.41236e-11	FALSE
YER071C	TDA2	chrV_302655_T_C_12493	0.0551695	2.28187	0.177533	0.0124203	0.215522	0.280847	FALSE
YER072W	VTC1	chrV_302655_T_C_12493	0.0403242	4.46609	0.00497925	-0.0012783	0.916272	0.93308	FALSE
YER073W	ALD5	chrV_302655_T_C_12493	0.00524262	0.57758	0.852282	-0.00337469	0.741527	0.790612	FALSE
YER074W	RPS24A	chrV_308135_G_A_12495	-0.00192602	0.525943	0.875997	0.00294381	0.689356	0.747249	FALSE
YER074W-A	YOS1	chrV_308135_G_A_12495	-0.0676343	1.06574	0.62882	-0.0028155	0.722839	0.774151	FALSE
YER075C	PTP3	chrV_308135_G_A_12495	0.0571523	1.14258	0.591813	0.00264089	0.710033	0.764302	FALSE
YER076C	YER076C	chrV_312677_G_A_12498	-0.87487	14.7344	0	-0.0867518	6.1098e-22	2.95816e-21	FALSE
YER077C	MRX1	chrV_312677_G_A_12498	-0.137816	1.92123	0.273527	0.00834516	0.261599	0.33211	FALSE
YER078C	ICP55	chrV_321717_C_A_12502	-0.000305479	1.33242	0.510835	-0.00174271	0.854277	0.884118	FALSE
YER079W	YER079W	chrV_321717_C_A_12502	-0.0372724	1.39749	0.482455	-0.0163479	0.334024	0.410667	FALSE
YER080W	AIM9	chrV_321717_C_A_12502	0.0377635	0.611759	0.838905	-0.029073	9.07648e-06	2.10801e-05	FALSE
YER081W	SER3	chrV_321717_C_A_12502	0.239335	14.9481	0	0.263883	2.2697e-91	4.17304e-90	FALSE
YER082C	UTP7	chrV_321717_C_A_12502	0.00194432	1.25496	0.545146	-0.015124	0.0711275	0.102964	FALSE
YER083C	GET2	chrV_328525_G_A_12508	0.0262017	0.604301	0.842389	-0.00023579	0.951454	0.961883	FALSE
YER084W	YER084W	chrV_328525_G_A_12508	0.0337362	0.801189	0.753445	0.0197052	0.447768	0.524337	FALSE
YER086W	ILV1	chrV_328525_G_A_12508	-0.0598871	2.76643	0.0916534	-0.060736	2.21885e-20	1.01907e-19	FALSE
YER087C-B	SBH1	chrV_332539_C_G_12516	-0.0375797	3.1806	0.0491045	-0.124389	3.88159e-49	3.59142e-48	FALSE
YER087W	AIM10	chrV_332539_C_G_12516	-0.153353	2.87377	0.0798076	-0.00963095	0.399579	0.476793	FALSE
YER088C-A	YER088C-A	chrV_335604_T_C_12542	0.276197	2.45484	0.144065	0.0512618	2.07334e-05	4.64915e-05	FALSE
YER089C	PTC2	chrV_335604_T_C_12542	0.172338	11.7111	0	0.122101	1.3483e-61	1.60616e-60	FALSE
YER090W	TRP2	chrV_335604_T_C_12542	0.0405165	1.47467	0.446583	0.0156552	0.00951889	0.0158963	FALSE
YER091C	MET6	chrV_335604_T_C_12542	0.0324982	2.94437	0.0748732	0.00343268	0.74837	0.796571	FALSE
YER092W	IES5	chrV_335604_T_C_12542	-0.0153323	1.32748	0.512552	-0.00730242	0.395274	0.472445	FALSE
YER093C	TSC11	chrV_335604_T_C_12542	-0.138107	0.916591	0.69575	-0.0157396	0.0159004	0.0256905	FALSE
YER093C-A	AIM11	chrV_357876_C_T_12573	-0.0212732	0.215725	0.980187	0.00185243	0.877565	0.903966	FALSE
YER094C	PUP3	chrV_357876_C_T_12573	0.031148	2.75843	0.0924041	-0.0155338	0.00942965	0.0157652	FALSE
YER095W	RAD51	chrV_357876_C_T_12573	-0.0178705	0.52233	0.877393	0.00261769	0.768075	0.813155	FALSE
YER096W	SHC1	chrV_357876_C_T_12573	-0.119617	0.616008	0.836231	-0.0565172	0.0309255	0.0476893	FALSE
YER098W	UBP9	chrV_357876_C_T_12573	-0.00494861	0.461861	0.902506	0.152899	1.85404e-37	1.36265e-36	FALSE
YER099C	PRS2	chrV_357876_C_T_12573	-0.00730476	0.544947	0.868332	0.00549223	0.251953	0.321505	FALSE
YER100W	UBC6	chrV_360247_A_G_12577	-0.0308724	1.11152	0.606689	0.0200584	0.000941642	0.00178762	FALSE
YER101C	AST2	chrV_360247_A_G_12577	-0.0417038	0.686191	0.805611	-0.0594045	2.96038e-07	7.65948e-07	FALSE
YER102W	RPS8B	chrV_360247_A_G_12577	-0.0175145	4.46644	0.00497925	-0.0157764	0.0345457	0.0528302	FALSE
YER103W	SSA4	chrV_367786_G_A_12595	-0.0188259	1.47991	0.443458	0.0169205	0.522191	0.595748	FALSE
YER104W	RTT105	chrV_367786_G_A_12595	0.221712	5.2763	0.000653595	0.0827925	4.40989e-18	1.87338e-17	FALSE
YER105C	NUP157	chrV_367786_G_A_12595	0.109452	4.16516	0.00776197	0.0415604	1.30941e-11	4.30547e-11	FALSE
YER107C	GLE2	chrV_374819_A_C_12624	0.0494848	3.75751	0.0189881	0.0583965	8.35845e-37	6.03455e-36	FALSE
YER110C	KAP123	chrV_374819_A_C_12624	0.0666992	2.4472	0.14533	0.0356304	0.000937552	0.00178045	FALSE
YER111C	SWI4	chrV_387695_T_A_12640	-0.0235926	0.657469	0.817341	0.00450906	0.602726	0.668518	FALSE
YER112W	LSM4	chrV_387695_T_A_12640	0.0200837	0.282984	0.962672	0.0169404	0.0342854	0.0524743	FALSE
YER113C	TMN3	chrV_387695_T_A_12640	-0.0200931	0.507529	0.882858	0.010415	0.0745068	0.107339	FALSE
YER114C	BOI2	chrV_387695_T_A_12640	0.15288	3.62312	0.0232027	-0.0552466	1.11999e-14	4.23553e-14	FALSE
YER115C	SPR6	chrV_387695_T_A_12640	-0.070682	1.30185	0.523226	-0.0890685	4.06024e-31	2.53454e-30	FALSE
YER116C	SLX8	chrV_387695_T_A_12640	0.0125628	0.887435	0.712494	0.0693946	1.13198e-14	4.27804e-14	FALSE
YER117W	RPL23B	chrV_387695_T_A_12640	0.004517	2.28633	0.17627	0.0049656	0.507029	0.580767	FALSE
YER118C	SHO1	chrV_408422_T_C_12680	0.0127117	0.495123	0.888346	-0.0148223	0.0122857	0.0202041	FALSE
YER119C	AVT6	chrV_408422_T_C_12680	-0.227382	14.1264	0	-0.142651	2.26743e-36	1.61661e-35	FALSE
YER120W	SCS2	chrV_408422_T_C_12680	-0.109652	28.6122	0	-0.0635536	1.15334e-41	9.13404e-41	FALSE
YER121W	YER121W	chrV_408422_T_C_12680	-0.129236	1.17831	0.577617	-0.0795683	0.000752476	0.00144433	FALSE
YER122C	GLO3	chrV_408422_T_C_12680	-0.0188754	1.31788	0.516315	-0.00313939	0.591291	0.658423	FALSE
YER123W	YCK3	chrV_408422_T_C_12680	0.0470936	0.823088	0.744763	0.00710947	0.382279	0.45999	FALSE
YER124C	DSE1	chrV_408422_T_C_12680	0.0286213	1.2569	0.54416	0.0983816	3.19992e-21	1.51341e-20	FALSE
YER129W	SAK1	chrV_421040_C_T_12711	0.0520688	0.73485	0.782256	-0.0158046	0.00401336	0.00704803	FALSE
YER130C	COM2	chrV_421040_C_T_12711	-0.0211932	0.116085	0.994827	-0.0403867	0.000105946	0.000223213	FALSE
YER131W	RPS26B	chrV_425002_G_A_12726	-0.00577421	2.63149	0.111313	-0.0138562	0.0932961	0.13244	FALSE
YER132C	PMD1	chrV_425002_G_A_12726	-0.0437856	3.17589	0.0493017	0.0178954	0.0360443	0.0550338	FALSE
YER133W	GLC7	chrV_434623_T_C_12784	0.00427583	0.406958	0.923363	-0.00671571	0.283722	0.356163	FALSE
YER134C	YER134C	chrV_434623_T_C_12784	0.0474899	1.80902	0.311841	0.00494728	0.57097	0.639781	FALSE
YER136W	GDI1	chrV_442211_A_G_12795	-0.0269561	0.699724	0.79983	-0.00614784	0.394091	0.471228	FALSE
YER137C	YER137C	chrV_442211_A_G_12795	-0.0306218	0.969909	0.670643	0.0210268	0.0377046	0.0573544	FALSE
YER138W-A	YER138W-A	chrV_449020_T_A_12803	-1.05682	12.8312	0				FALSE
YER139C	RTR1	chrV_449020_T_A_12803	0.843632	30.5684	0	0.34194	2.62872e-207	1.37899e-205	FALSE
YER140W	EMP65	chrV_455676_T_C_12813	-0.0161773	0.825737	0.744691	0.044983	8.1221e-15	3.09614e-14	FALSE
YER141W	COX15	chrV_455676_T_C_12813	0.0591943	0.473646	0.897379	-0.0298083	0.0396659	0.060098	FALSE
YER142C	MAG1	chrV_455676_T_C_12813	0.129686	2.56063	0.123035	0.0279594	0.0270246	0.0421743	FALSE
YER143W	DDI1	chrV_455676_T_C_12813	-0.0436545	0.781713	0.763581	-0.0162333	0.0634867	0.0928907	FALSE
YER144C	UBP5	chrV_460898_A_G_12819	0.143736	1.953	0.260776	0.0881687	1.16289e-25	6.28488e-25	FALSE
YER145C	FTR1	chrV_460898_A_G_12819	-0.0981901	47.8269	0	-0.141067	5.32851e-26	2.91007e-25	TRUE
YER147C	SCC4	chrV_464494_G_A_12829	0.0675329	1.29265	0.527691	-0.00541022	0.36139	0.438359	FALSE
YER148W	SPT15	chrV_464494_G_A_12829	0.0253959	1.29494	0.526542	-0.00241611	0.615498	0.68153	FALSE
YER149C	PEA2	chrV_467553_T_C_12830	-0.0907442	2.4858	0.138042	0.0152051	0.0132194	0.0216523	FALSE
YER150W	SPI1	chrV_467553_T_C_12830	0.238543	9.82088	0	0.0387651	0.191949	0.253596	FALSE
YER151C	UBP3	chrV_467553_T_C_12830	0.0782201	1.35928	0.49937	-0.00634613	0.308917	0.383165	FALSE
YER152C	YER152C	chrV_467553_T_C_12830	-0.0181199	0.390739	0.928227	0.00742475	0.243768	0.312246	FALSE
YER154W	OXA1	chrV_483439_C_T_12871	0.0245477	0.520052	0.878274	0.00390038	0.517438	0.591151	FALSE
YER155C	BEM2	chrV_483439_C_T_12871	0.00219475	0.410835	0.92154	-0.0334866	0.000544077	0.00106287	FALSE
YER156C	YER156C	chrV_483439_C_T_12871	-0.0129925	3.61703	0.0232558	0.0368967	0.000712431	0.00136976	FALSE
YER157W	COG3	chrV_483439_C_T_12871	-0.00867272	1.16958	0.58054	-0.110566	5.90471e-76	8.65721e-75	FALSE
YER161C	SPT2	chrV_502082_C_T_12937	0.0279066	0.411295	0.921335	0.00451134	0.601208	0.667127	FALSE
YER162C	RAD4	chrV_502082_C_T_12937	-0.0984951	1.21616	0.563988	-0.0632866	5.61874e-12	1.87663e-11	FALSE
YER164W	CHD1	chrV_506069_C_T_12971	-0.0646337	1.05795	0.633152	-0.0655908	1.12961e-13	4.09582e-13	FALSE
YER165W	PAB1	chrV_506069_C_T_12971	0.030183	1.38928	0.486486	0.0243158	0.0030965	0.00552098	FALSE
YER166W	DNF1	chrV_520669_G_A_13028	0.0428772	4.01154	0.0107466	0.00494978	0.546613	0.618103	FALSE
YER167W	BCK2	chrV_520669_G_A_13028	-0.0406989	2.2139	0.192232	0.0376955	1.54957e-08	4.37984e-08	FALSE
YER171W	RAD3	chrV_529484_G_T_13079	-0.0455158	1.05916	0.632664	0.0217279	3.31466e-06	7.93022e-06	FALSE
YER172C	BRR2	chrV_529484_G_T_13079	-0.0806073	1.92302	0.27299	-0.0121904	0.150763	0.205351	FALSE
YER173W	RAD24	chrV_536075_C_T_13110	-0.0716461	1.06865	0.62705	-0.0224933	0.000208395	0.00042603	FALSE
YER174C	GRX4	chrV_536075_C_T_13110	-0.0504042	4.99175	0.0017991	0.100304	3.99882e-18	1.70002e-17	TRUE
YER175C	TMT1	chrV_542361_G_A_13157	0.0115947	1.1096	0.607682	0.0374633	0.0334383	0.0512464	FALSE
YER176W	ECM32	chrV_542361_G_A_13157	-0.0809383	3.07912	0.0584641	-0.00780123	0.222988	0.288994	FALSE
YER177W	BMH1	chrV_546667_T_C_13162	-0.00839905	2.70145	0.0997367	-0.0113917	0.0595878	0.0875669	FALSE
YER178W	PDA1	chrV_546667_T_C_13162	-0.00945468	2.74166	0.0945542	-0.0524352	4.70207e-12	1.57784e-11	FALSE
YER179W	DMC1	chrV_546667_T_C_13162	-0.0781676	3.15142	0.0510834	0.0441634	0.0124572	0.0204566	FALSE
YER180C	ISC10	chrV_546667_T_C_13162	0.0884774	1.60775	0.388888	-0.120633	9.32753e-55	9.67964e-54	FALSE
YER182W	FMP10	chrV_553466_A_G_13223	0.0993896	1.86734	0.291703	0.0643291	8.96001e-05	0.000189964	FALSE
YER183C	FAU1	chrV_553466_A_G_13223	-0.0264815	0.947992	0.680899	-0.10191	5.61542e-58	6.30825e-57	FALSE
YER184C	TOG1	chrV_553466_A_G_13223	-0.350802	1.95998	0.257925	-0.182785	1.2674e-53	1.29642e-52	FALSE
YER185W	PUG1	chrV_553466_A_G_13223	-0.60084	3.69605	0.019932	-0.450259	4.07232e-96	7.7878e-95	FALSE
YER186C	YER186C	chrV_566844_A_G_13402	-0.0771419	1.98071	0.250529	-0.0599536	3.55526e-17	1.46357e-16	FALSE
YER187W	YER187W	chrV_566844_A_G_13402	2.6123	238.273	0	1.16592	0	0	FALSE
YER188W	YER188W	chrV_566844_A_G_13402	-1.17104	14.0065	0				FALSE
YFL001W	DEG1	chrVI_149514_G_A_14582	-0.237146	9.24159	0	-0.122693	1.11458e-65	1.40378e-64	FALSE
YFL005W	SEC4	chrVI_129805_G_A_14483	-0.0534763	3.96261	0.0114286	-0.00767524	0.151772	0.206528	FALSE
YFL007W	BLM10	chrVI_129805_G_A_14483	0.0272533	1.28696	0.529844	0.0261669	0.00177822	0.00327679	FALSE
YFL017C	GNA1	chrVI_103933_A_G_14378	0.106263	9.58568	0	-0.0710316	1.46316e-21	6.99529e-21	FALSE
YFL017W-A	SMX2	chrVI_103933_A_G_14378	0.061428	0.763047	0.771294	-0.0690958	1.24882e-16	5.04645e-16	FALSE
YFL022C	FRS2	chrVI_94981_T_C_14265	-0.0828709	9.08295	0	-0.0822658	4.45509e-49	4.11538e-48	FALSE
YFL023W	BUD27	chrVI_94981_T_C_14265	-0.0560014	0.827682	0.744638	-0.00208526	0.801129	0.840215	FALSE
YFL031W	HAC1	chrVI_75514_C_T_14123	-0.0803499	32.5844	0	-0.00506397	0.670701	0.731325	FALSE
YFL032W	YFL032W	chrVI_75514_C_T_14123	-0.0310497	1.40664	0.478685	0.0773082	0.000980373	0.00185868	FALSE
YFL033C	RIM15	chrVI_75514_C_T_14123	0.181535	1.81854	0.308244	-0.0743928	1.67617e-11	5.47677e-11	FALSE
YFL044C	OTU1	chrVI_44748_T_C_13941	0.108083	4.34405	0.00671141	-0.0608537	2.46116e-14	9.19197e-14	FALSE
YFL045C	SEC53	chrVI_44748_T_C_13941	-0.0716143	18.1863	0	-0.0508125	6.82857e-14	2.48858e-13	TRUE
YFL046W	FMP32	chrVI_44748_T_C_13941	0.0923232	2.11301	0.217266	0.0804366	2.00392e-23	1.01223e-22	FALSE
YFL059W	SNZ3	chrVI_6260_G_T_13405	3.77651	126.507	0	-0.805674	1.59942e-43	1.32352e-42	TRUE
YFL062W	COS4	chrVI_6260_G_T_13405	0.230968	4.20937	0.00763976	0.05035	0.271162	0.342274	FALSE
YFR001W	LOC1	chrVI_149514_G_A_14582	0.0452912	1.36967	0.495193	0.0405934	2.77856e-06	6.70655e-06	FALSE
YFR004W	RPN11	chrVI_153977_T_C_14601	0.0421954	2.69381	0.101011	0.0473328	9.27103e-15	3.52706e-14	FALSE
YFR005C	SAD1	chrVI_153977_T_C_14601	-0.0783532	1.20066	0.571521	-0.0678785	4.70318e-22	2.28292e-21	FALSE
YFR006W	YFR006W	chrVI_153977_T_C_14601	0.273468	29.2293	0	0.172575	8.12759e-102	1.68995e-100	FALSE
YFR007W	YFH7	chrVI_164557_A_G_14698	0.0853305	1.12362	0.60106	0.0395532	0.000374977	0.000746558	FALSE
YFR009W	GCN20	chrVI_164557_A_G_14698	0.113827	3.53372	0.0255015	0.0983375	7.38865e-62	8.85708e-61	FALSE
YFR010W	UBP6	chrVI_164557_A_G_14698	0.0830141	4.40825	0.00596206	0.0425635	6.98539e-13	2.43107e-12	FALSE
YFR014C	CMK1	chrVI_172598_A_T_14758	0.23096	15.67	0	0.117886	1.33767e-14	5.03875e-14	FALSE
YFR015C	GSY1	chrVI_172598_A_T_14758	0.0397782	1.06454	0.629557	0.0918829	0.00281334	0.00503969	FALSE
YFR016C	YFR016C	chrVI_172598_A_T_14758	0.013928	0.428931	0.91564	-0.00102049	0.915839	0.93308	FALSE
YFR017C	IGD1	chrVI_172598_A_T_14758	0.0146287	0.319375	0.949481	0.047991	0.0762403	0.109643	FALSE
YFR018C	YFR018C	chrVI_194593_G_T_14958	-0.0021959	0.456587	0.904481	-0.00762523	0.334107	0.410667	FALSE
YFR019W	FAB1	chrVI_194593_G_T_14958	-0.0662961	1.26075	0.54213	-0.0428652	5.14808e-06	1.21891e-05	FALSE
YFR020W	CSS2	chrVI_194593_G_T_14958	0.0524306	1.78827	0.318208	-0.102136	3.49756e-20	1.59865e-19	FALSE
YFR021W	ATG18	chrVI_196316_C_A_14962	0.0740886	0.919909	0.694009	0.00525181	0.443711	0.521188	FALSE
YFR022W	ROG3	chrVI_196316_C_A_14962	-0.0775109	0.749269	0.776644	-0.0433005	1.25684e-05	2.87005e-05	FALSE
YFR024C-A	LSB3	chrVI_201882_T_C_14996	0.0503826	3.3701	0.035564	0.0463751	1.58128e-11	5.17857e-11	FALSE
YFR025C	HIS2	chrVI_201882_T_C_14996	-0.179757	5.16627	0.000653595	-0.141296	1.26253e-102	2.65409e-101	FALSE
YFR026C	ULI1	chrVI_208850_A_T_15048	-1.38214	18.2344	0	-0.769012	2.25065e-104	4.7841e-103	FALSE
YFR027W	ECO1	chrVI_208850_A_T_15048	-0.00624118	3.67489	0.0207675	0.0323276	0.000345581	0.000691646	FALSE
YFR028C	CDC14	chrVI_208850_A_T_15048	-0.195808	2.74405	0.0942269	-0.011703	0.0188007	0.0300454	FALSE
YFR029W	PTR3	chrVI_212247_G_A_15054	0.156811	2.75275	0.093083	0.00854498	0.203731	0.267585	FALSE
YFR030W	MET10	chrVI_212247_G_A_15054	0.0464616	2.29985	0.173841	0.0202011	0.0960153	0.136097	FALSE
YFR031C	SMC2	chrVI_223266_T_G_15063	0.0184898	1.39436	0.483992	-0.0113711	0.0468427	0.0701536	FALSE
YFR031C-A	RPL2A	chrVI_223266_T_G_15063	0.0247706	4.73161	0.0028777	0.0301814	2.54552e-06	6.16226e-06	FALSE
YFR032C-A	RPL29	chrVI_223266_T_G_15063	0.0245452	1.7909	0.317283	0.475956	1.23268e-202	6.23758e-201	FALSE
YFR033C	QCR6	chrVI_223266_T_G_15063	-0.0222371	0.372541	0.935098	0.0172632	0.251655	0.321198	FALSE
YFR034C	PHO4	chrVI_226463_C_T_15073	0.00797507	1.92693	0.271821	-0.147882	5.73476e-42	4.56069e-41	FALSE
YFR034W-A	YFR034W-A	chrVI_226463_C_T_15073	-0.254684	2.97766	0.0717075	-0.123977	9.39442e-12	3.10505e-11	FALSE
YFR038W	IRC5	chrVI_229349_G_A_15102	0.0794171	11.0199	0	-0.00255703	0.66814	0.729367	TRUE
YFR039C	OSW7	chrVI_229349_G_A_15102	0.00453978	1.419	0.473595	-0.00764748	0.258896	0.329044	FALSE
YFR040W	SAP155	chrVI_239066_C_T_15174	-0.27223	9.33355	0	-0.0263651	5.00193e-05	0.000108337	FALSE
YFR041C	ERJ5	chrVI_239066_C_T_15174	-0.148216	4.69454	0.00386173	0.0304188	0.00128696	0.00240878	FALSE
YFR042W	KEG1	chrVI_239066_C_T_15174	0.240409	17.1748	0	0.128695	5.20046e-28	2.97363e-27	FALSE
YFR043C	IRC6	chrVI_239066_C_T_15174	0.0821549	4.84244	0.0017991	0.0166366	0.0435684	0.0655763	FALSE
YFR045W	YFR045W	chrVI_242888_A_G_15204	0.00758743	3.51723	0.0263961	0.0151498	0.248847	0.317968	FALSE
YFR046C	CNN1	chrVI_242888_A_G_15204	-0.0705404	1.24489	0.549453	-0.0442402	2.45944e-08	6.85002e-08	FALSE
YFR049W	YMR31	chrVI_251165_A_G_15216	0.0194425	1.81695	0.308856	0.0179257	0.155105	0.210362	FALSE
YFR050C	PRE4	chrVI_251165_A_G_15216	0.00533534	1.47099	0.448782	0.0032491	0.566453	0.635582	FALSE
YFR051C	RET2	chrVI_251165_A_G_15216	0.000148805	0.851816	0.731217	-0.0196458	0.000518884	0.00101748	FALSE
YFR052C-A	YFR052C-A	chrVI_251165_A_G_15216	-0.0794205	1.01697	0.65008	0.0549932	0.0764405	0.109876	FALSE
YFR052W	RPN12	chrVI_251165_A_G_15216	0.0211921	1.18385	0.576521	0.0133662	0.0216871	0.0343319	FALSE
YFR053C	HXK1	chrVI_251165_A_G_15216	-0.0324023	1.13466	0.596295	0.058021	0.0637556	0.0932365	FALSE
YGL001C	ERG26	chrVII_497059_T_C_17719	0.0919416	7.75923	0	0.0804334	1.34361e-12	4.63375e-12	FALSE
YGL002W	ERP6	chrVII_497059_T_C_17719	-0.0625457	1.84774	0.299458	-0.114047	1.31095e-55	1.38558e-54	FALSE
YGL005C	COG7	chrVII_489423_A_G_17659	0.000408604	2.82275	0.0845909	-0.11153	3.04742e-37	2.2226e-36	FALSE
YGL006W	PMC1	chrVII_489423_A_G_17659	0.114992	3.94391	0.0117917	0.0184634	0.147613	0.201636	FALSE
YGL009C	LEU1	chrVII_474798_C_T_17595	0.0400888	2.45923	0.143241	-0.0821589	5.79241e-14	2.11771e-13	FALSE
YGL010W	MPO1	chrVII_474798_C_T_17595	0.133874	3.19497	0.0483056	0.225977	2.40103e-53	2.43855e-52	FALSE
YGL011C	SCL1	chrVII_474798_C_T_17595	-0.00569868	0.626846	0.831484	0.0326972	2.34137e-10	7.25634e-10	FALSE
YGL012W	ERG4	chrVII_474798_C_T_17595	0.0421123	2.70383	0.0995773	-0.00971722	0.161201	0.217598	FALSE
YGL013C	PDR1	chrVII_469047_A_G_17570	0.0719243	2.08055	0.225017	0.0219664	0.00123511	0.00231629	FALSE
YGL014W	PUF4	chrVII_469047_A_G_17570	-0.456872	24.9505	0	-0.0317315	6.56484e-05	0.000140643	FALSE
YGL016W	KAP122	chrVII_459164_C_T_17506	-0.0705768	0.48981	0.89065	-0.0445365	8.76909e-10	2.63349e-09	FALSE
YGL017W	ATE1	chrVII_459164_C_T_17506	0.279766	13.4942	0	0.143698	1.70546e-96	3.27241e-95	FALSE
YGL018C	JAC1	chrVII_459164_C_T_17506	0.136927	3.00158	0.0681844	0.0767396	6.31545e-17	2.57757e-16	FALSE
YGL023C	PIB2	chrVII_449895_G_A_17468	-0.0476065	1.03102	0.644505	0.00145006	0.810856	0.847774	FALSE
YGL025C	PGD1	chrVII_449895_G_A_17468	-0.0527753	2.08145	0.22486	0.044122	2.4247e-08	6.75984e-08	FALSE
YGL026C	TRP5	chrVII_446235_A_T_17447	0.0282772	1.88351	0.285486	0.0293483	0.000142253	0.000295354	FALSE
YGL027C	CWH41	chrVII_446235_A_T_17447	-0.131508	5.63634	0.000403226	-0.110908	9.24071e-62	1.10541e-60	FALSE
YGL028C	SCW11	chrVII_442299_C_G_17438	-0.00702756	0.405477	0.92407	-0.0258174	0.0174393	0.0280028	FALSE
YGL029W	CGR1	chrVII_442299_C_G_17438	0.073377	1.44903	0.458613	-0.00997248	0.362307	0.439379	FALSE
YGL030W	RPL30	chrVII_442299_C_G_17438	0.00443009	0.931044	0.689615	-0.013221	0.169068	0.227039	FALSE
YGL031C	RPL24A	chrVII_442299_C_G_17438	0.0284021	9.0609	0	0.0162572	0.0295413	0.0457275	FALSE
YGL032C	AGA2	chrVII_442299_C_G_17438	0.0416016	1.18471	0.5764	0.160738	0.156312	0.211899	FALSE
YGL033W	HOP2	chrVII_430559_A_G_17395	-0.0260876	1.08302	0.620013	0.272114	3.41646e-23	1.70465e-22	FALSE
YGL035C	MIG1	chrVII_430559_A_G_17395	0.0450123	0.802506	0.753	0.299836	1.36127e-132	3.89188e-131	FALSE
YGL036W	YGL036W	chrVII_430559_A_G_17395	-0.0582772	0.490871	0.890199	0.0187164	0.0822322	0.117846	FALSE
YGL038C	OCH1	chrVII_425446_A_C_17390	0.0495934	1.71307	0.347992	0.00264864	0.867898	0.895298	FALSE
YGL039W	YGL039W	chrVII_425446_A_C_17390	-0.0577217	4.48688	0.00497925	0.0603436	0.000123234	0.000257643	FALSE
YGL041W-A	YGL041W-A	chrVII_418292_A_T_17385	0.00886228	1.42309	0.471537	-0.00527176	0.459775	0.535764	FALSE
YGL043W	DST1	chrVII_418292_A_T_17385	0.0522329	2.81476	0.0852031	-0.0120225	0.0311823	0.0480649	FALSE
YGL044C	RNA15	chrVII_416060_G_A_17375	0.0703431	0.92934	0.69038	-0.0192385	0.00587662	0.0101212	FALSE
YGL045W	RIM8	chrVII_416060_G_A_17375	-0.0974693	1.83913	0.301928	0.150981	2.58662e-69	3.42368e-68	FALSE
YGL049C	TIF4632	chrVII_406503_C_T_17314	-0.161456	4.0467	0.0103797	-0.145782	2.8813e-55	3.03412e-54	FALSE
YGL050W	TYW3	chrVII_406503_C_T_17314	0.178832	7.96779	0	0.0476135	1.20625e-13	4.36816e-13	FALSE
YGL053W	PRM8	chrVII_401117_A_G_17268	-1.83413	165.692	0	-3.14875	0	0	FALSE
YGL054C	ERV14	chrVII_401117_A_G_17268	-0.0646622	3.36884	0.0356849	-0.0294913	5.31632e-05	0.000114929	FALSE
YGL056C	SDS23	chrVII_396062_T_C_17244	0.0409527	0.64653	0.822723	-0.0646528	4.92502e-25	2.60994e-24	FALSE
YGL057C	GEP7	chrVII_396062_T_C_17244	-0.477342	16.4437	0	-0.309635	6.38536e-130	1.7986e-128	FALSE
YGL059W	PKP2	chrVII_392315_T_C_17227	0.0216795	0.405127	0.924237	-0.0384177	0.00118632	0.0022321	FALSE
YGL060W	YBP2	chrVII_392315_T_C_17227	-0.0738097	0.805401	0.752023	-0.0142445	0.0321005	0.0493284	FALSE
YGL065C	ALG2	chrVII_378078_C_A_17185	0.0633926	0.826468	0.744671	0.045994	3.59772e-13	1.27143e-12	FALSE
YGL066W	SGF73	chrVII_378078_C_A_17185	0.119278	2.06946	0.228591	0.125427	1.40403e-55	1.48123e-54	FALSE
YGL077C	HNM1	chrVII_362321_A_G_17136	0.0557427	3.45656	0.0305494	0.0690242	8.81467e-19	3.83287e-18	FALSE
YGL078C	DBP3	chrVII_362321_A_G_17136	-0.0297111	0.803608	0.752628	-0.0315458	0.00105368	0.00199302	FALSE
YGL079W	KXD1	chrVII_357841_T_C_17122	0.0169158	0.795445	0.755971	0.0291963	0.000207618	0.000424744	FALSE
YGL080W	MPC1	chrVII_357841_T_C_17122	0.0393382	3.16916	0.0496522	0.142155	1.04721e-47	9.38545e-47	FALSE
YGL081W	YGL081W	chrVII_357841_T_C_17122	0.0192773	0.504289	0.884305	0.260395	7.99764e-37	5.78136e-36	FALSE
YGL082W	YGL082W	chrVII_357041_C_T_17120	-0.100615	4.56897	0.00422998	-0.0423081	4.52326e-06	1.07364e-05	FALSE
YGL083W	SCY1	chrVII_357041_C_T_17120	-0.0812681	2.85086	0.0816656	-0.046189	2.72468e-08	7.56664e-08	FALSE
YGL084C	GUP1	chrVII_350521_T_A_17089	-0.0283536	0.658605	0.81673	6.8125e-05	0.991605	0.993454	FALSE
YGL085W	LCL3	chrVII_350521_T_A_17089	-0.111823	1.54448	0.417555	0.0259098	0.000251853	0.000510853	FALSE
YGL087C	MMS2	chrVII_345331_C_T_17082	-0.0211344	1.164	0.582998	0.00944684	0.222333	0.288277	FALSE
YGL088W	YGL088W	chrVII_345331_C_T_17082	-0.00436315	0.0618252	0.99825	-0.00372413	0.863119	0.891012	FALSE
YGL089C	MF(ALPHA)2	chrVII_345331_C_T_17082	0.185046	1.17313	0.579323	-0.133136	0.221077	0.286778	FALSE
YGL091C	NBP35	chrVII_342051_A_G_17080	-0.0089224	0.76358	0.77113	0.016947	0.00642746	0.0110136	FALSE
YGL092W	NUP145	chrVII_342051_A_G_17080	0.0584352	2.92572	0.0754155	0.0246596	0.00032288	0.00064871	FALSE
YGL093W	SPC105	chrVII_334704_T_C_17069	0.00718223	0.880154	0.715096	0.0313892	9.41946e-07	2.35096e-06	FALSE
YGL094C	PAN2	chrVII_334704_T_C_17069	-0.152057	3.18139	0.0490849	-0.024017	3.03131e-05	6.71562e-05	FALSE
YGL096W	TOS8	chrVII_323836_C_T_17058	-0.425046	9.72518	0	-0.214269	2.05211e-25	1.09663e-24	FALSE
YGL097W	SRM1	chrVII_323836_C_T_17058	-0.0181451	1.41247	0.476356	0.00325785	0.479762	0.554085	FALSE
YGL099W	LSG1	chrVII_314032_A_G_17018	-0.0629476	3.98274	0.0111575	-0.000395521	0.958686	0.967826	FALSE
YGL100W	SEH1	chrVII_314032_A_G_17018	-0.0116776	2.08455	0.224319	0.0259572	2.0907e-08	5.85724e-08	FALSE
YGL101W	YGL101W	chrVII_312897_C_T_17016	0.0959625	3.06021	0.0610509	0.043282	8.70713e-06	2.0247e-05	FALSE
YGL103W	RPL28	chrVII_312897_C_T_17016	-0.00313048	3.1596	0.0506514	0.0352563	5.80636e-07	1.47036e-06	FALSE
YGL106W	MLC1	chrVII_307064_C_G_16994	0.23547	25.8915	0	0.047036	3.7384e-16	1.49484e-15	FALSE
YGL107C	RMD9	chrVII_307064_C_G_16994	0.0835505	1.96263	0.257102	-0.0126509	0.121592	0.168386	FALSE
YGL110C	CUE3	chrVII_301819_G_T_16974	-0.166856	3.9478	0.0115599	-0.0351045	2.11439e-09	6.23523e-09	FALSE
YGL111W	NSA1	chrVII_301819_G_T_16974	-0.126088	5.21758	0.000653595	0.0304596	9.57385e-05	0.000202378	FALSE
YGL112C	TAF6	chrVII_301819_G_T_16974	-0.0752788	2.67213	0.104575	-0.100538	3.74835e-84	6.19452e-83	FALSE
YGL113W	SLD3	chrVII_295605_C_G_16955	-0.0247585	0.843934	0.735426	-0.00386103	0.521061	0.594577	FALSE
YGL114W	YGL114W	chrVII_295605_C_G_16955	-0.0247709	0.423171	0.91682	-0.0162463	0.00111815	0.00210871	FALSE
YGL117W	YGL117W	chrVII_289212_T_C_16940	0.217351	20.6395	0	0.134866	1.71248e-17	7.11108e-17	FALSE
YGL119W	COQ8	chrVII_289212_T_C_16940	-0.0417654	1.00783	0.655362	-0.0188352	0.00306834	0.00547419	FALSE
YGL120C	PRP43	chrVII_276488_G_T_16901	0.0553787	1.61294	0.386718	0.0231777	0.00927884	0.0155317	FALSE
YGL121C	GPG1	chrVII_276488_G_T_16901	0.0171002	0.432654	0.914286	-0.0239245	0.348143	0.425074	FALSE
YGL122C	NAB2	chrVII_276488_G_T_16901	-0.0222609	0.737791	0.780696	-0.0391598	9.15958e-11	2.89362e-10	FALSE
YGL123W	RPS2	chrVII_276488_G_T_16901	-0.00384702	0.768266	0.769692	0.011471	0.114173	0.159385	FALSE
YGL124C	MON1	chrVII_276488_G_T_16901	-0.952869	25.4032	0	-0.143744	1.17594e-68	1.53516e-67	FALSE
YGL125W	MET13	chrVII_272225_C_T_16882	-0.0449606	4.62887	0.0039886	0.1919	2.61274e-44	2.19057e-43	TRUE
YGL126W	SCS3	chrVII_272225_C_T_16882	0.773641	33.3667	0	0.0533787	9.31478e-05	0.000197339	FALSE
YGL127C	SOH1	chrVII_272225_C_T_16882	0.00997629	0.152882	0.991622	0.0192711	0.0595045	0.0874895	FALSE
YGL128C	CWC23	chrVII_267458_C_T_16879	0.105866	0.82214	0.744789	0.00266193	0.78724	0.828384	FALSE
YGL129C	RSM23	chrVII_267458_C_T_16879	-0.0573551	0.692904	0.802909	-0.00704263	0.478476	0.552995	FALSE
YGL130W	CEG1	chrVII_267458_C_T_16879	-0.0436117	0.392543	0.927927	0.0238205	3.04898e-05	6.75217e-05	FALSE
YGL131C	SNT2	chrVII_260913_T_C_16878	-0.0198303	0.709564	0.795673	0.00324063	0.704722	0.760263	FALSE
YGL133W	ITC1	chrVII_260913_T_C_16878	0.0082308	1.56904	0.406434	0.00479109	0.477178	0.551882	FALSE
YGL134W	PCL10	chrVII_254177_A_G_16866	0.0454386	1.25455	0.54535	-0.0256039	0.000457867	0.000903723	FALSE
YGL135W	RPL1B	chrVII_254177_A_G_16866	-0.000878987	1.27023	0.536351	0.0154897	0.119411	0.165847	FALSE
YGL136C	MRM2	chrVII_252804_A_T_16865	0.15542	3.48373	0.0291132	0.0853826	1.75601e-29	1.05471e-28	FALSE
YGL137W	SEC27	chrVII_252804_A_T_16865	0.214992	22.2883	0	0.0445066	1.02869e-14	3.90316e-14	FALSE
YGL140C	YGL140C	chrVII_241711_C_T_16862	0.0419049	0.323336	0.94835	-0.0113826	0.107464	0.150755	FALSE
YGL141W	HUL5	chrVII_241711_C_T_16862	0.0462977	0.600525	0.843964	-0.0171434	0.055788	0.0824278	FALSE
YGL142C	GPI10	chrVII_241711_C_T_16862	-0.0328006	1.23993	0.551201	-0.00415613	0.554965	0.626019	FALSE
YGL143C	MRF1	chrVII_241711_C_T_16862	-0.00400085	0.775144	0.76683	-0.0433253	6.08722e-05	0.000130902	FALSE
YGL144C	ROG1	chrVII_226152_C_T_16844	-0.00559374	0.959445	0.675971	0.00420264	0.548559	0.619893	FALSE
YGL145W	TIP20	chrVII_226152_C_T_16844	0.115486	2.21389	0.192235	0.0443612	2.95446e-11	9.57145e-11	FALSE
YGL146C	RRT6	chrVII_226152_C_T_16844	-0.0842884	1.40825	0.47807	0.0750844	2.78222e-06	6.71255e-06	FALSE
YGL147C	RPL9A	chrVII_226152_C_T_16844	-0.000844937	0.278165	0.963862	-0.0200738	0.068575	0.099698	FALSE
YGL148W	ARO2	chrVII_226152_C_T_16844	0.0301092	2.67355	0.104331	0.0275879	1.27414e-05	2.9084e-05	FALSE
YGL150C	INO80	chrVII_221007_G_T_16843	-0.00477454	0.152321	0.991699	0.0183066	0.0129954	0.0213161	FALSE
YGL151W	NUT1	chrVII_221007_G_T_16843	-0.0392227	0.833045	0.742456	-0.0107535	0.114007	0.159193	FALSE
YGL153W	PEX14	chrVII_221007_G_T_16843	-0.110655	3.85364	0.0152671	-0.0452475	1.69875e-08	4.7873e-08	FALSE
YGL154C	LYS5	chrVII_221007_G_T_16843	0.0508258	0.851739	0.731252	-0.0452077	8.90104e-07	2.22838e-06	FALSE
YGL155W	CDC43	chrVII_221007_G_T_16843	-0.0475366	1.18494	0.576367	-0.00711363	0.16473	0.221877	FALSE
YGL156W	AMS1	chrVII_221007_G_T_16843	0.0343961	0.583337	0.850342	-0.0389119	0.0741668	0.106876	FALSE
YGL157W	ARI1	chrVII_198476_T_C_16692	0.111422	4.35871	0.00650789	0.0515324	0.00020658	0.000423075	FALSE
YGL158W	RCK1	chrVII_198476_T_C_16692	-0.14239	0.338745	0.943838	-0.0673485	0.00165773	0.00306166	FALSE
YGL159W	YGL159W	chrVII_198476_T_C_16692	-0.0703227	1.67292	0.364339	-0.0438982	1.33933e-07	3.54551e-07	FALSE
YGL160W	AIM14	chrVII_198476_T_C_16692	-0.00603623	0.640405	0.825126	-0.0238868	0.0156798	0.0253698	FALSE
YGL161C	YIP5	chrVII_198476_T_C_16692	-0.041949	1.42162	0.472315	-0.0179101	0.0110865	0.0183428	FALSE
YGL162W	SUT1	chrVII_198476_T_C_16692	-0.275686	5.64853	0.000403226	-0.4166	3.46764e-89	6.13869e-88	FALSE
YGL163C	RAD54	chrVII_193691_A_G_16649	-0.0466449	1.91487	0.275084	-0.0642726	2.91237e-19	1.29092e-18	FALSE
YGL164C	YRB30	chrVII_193691_A_G_16649	-0.133701	5.43983	0.000653595	0.0146615	0.0534173	0.0792515	FALSE
YGL166W	CUP2	chrVII_193691_A_G_16649	-0.029956	0.744781	0.778039	-0.125295	4.46313e-33	2.91993e-32	FALSE
YGL171W	ROK1	chrVII_180027_A_G_16581	-0.182333	5.60842	0.000403226	0.0423164	6.83828e-05	0.000146337	FALSE
YGL172W	NUP49	chrVII_180027_A_G_16581	-0.0323725	0.992281	0.661644	-0.0321543	3.90599e-13	1.37528e-12	FALSE
YGL173C	XRN1	chrVII_180027_A_G_16581	0.0181827	0.580211	0.85132	-0.134701	2.07056e-63	2.55161e-62	FALSE
YGL174W	BUD13	chrVII_180027_A_G_16581	0.170676	5.46014	0.000653595	0.173743	1.26337e-80	2.0011e-79	FALSE
YGL175C	SAE2	chrVII_180027_A_G_16581	-0.228008	2.28529	0.176565	0.0424746	0.00137378	0.00256207	FALSE
YGL176C	YGL176C	chrVII_180027_A_G_16581	-0.0667526	1.13736	0.594583	-0.0425804	1.5689e-11	5.14095e-11	FALSE
YGL178W	MPT5	chrVII_162943_C_T_16488	0.397872	8.58922	0	0.00549818	0.669738	0.730621	FALSE
YGL179C	TOS3	chrVII_162943_C_T_16488	-0.115829	2.0176	0.241812	-0.318182	8.30026e-64	1.02729e-62	FALSE
YGL180W	ATG1	chrVII_162943_C_T_16488	0.0704284	0.835511	0.74074	0.0382078	0.00599012	0.0103043	FALSE
YGL181W	GTS1	chrVII_162943_C_T_16488	-0.253879	45.7351	0	-0.093628	3.36141e-35	2.32694e-34	TRUE
YGL184C	STR3	chrVII_148993_G_C_16464	0.109988	2.3925	0.155581	0.0651172	5.50428e-05	0.000118768	FALSE
YGL185C	YGL185C	chrVII_148993_G_C_16464	0.00268278	1.37816	0.491786	-0.0644999	4.07944e-15	1.56552e-14	FALSE
YGL186C	TPN1	chrVII_148993_G_C_16464	0.0133796	1.28532	0.530289	0.0252903	0.000101561	0.000214133	FALSE
YGL187C	COX4	chrVII_148993_G_C_16464	-0.0932827	3.92548	0.0126062	-0.127159	5.70024e-22	2.7622e-21	FALSE
YGL189C	RPS26A	chrVII_148993_G_C_16464	-0.00322624	1.17934	0.577277	0.016328	0.00415063	0.00727792	FALSE
YGL198W	YIP4	chrVII_124322_C_T_16193	0.00923534	0.693666	0.802565	-0.0420655	7.27687e-14	2.64858e-13	FALSE
YGL200C	EMP24	chrVII_124322_C_T_16193	-0.0215628	1.62627	0.381711	0.0695487	5.43811e-33	3.54562e-32	FALSE
YGL203C	KEX1	chrVII_111703_A_T_16100	-0.0474126	5.15439	0.000653595	-0.0797134	3.08652e-33	2.02626e-32	TRUE
YGL204C	YGL204C	chrVII_111703_A_T_16100	1.36623	25.3939	0	-0.494314	2.8527e-129	7.91833e-128	FALSE
YGL205W	POX1	chrVII_111703_A_T_16100	0.570377	9.89801	0	0.122398	4.33829e-05	9.45003e-05	FALSE
YGL209W	MIG2	chrVII_96869_G_A_15986	-0.13293	5.10619	0.00131866	0.0295105	0.0911992	0.129656	FALSE
YGL210W	YPT32	chrVII_96869_G_A_15986	-0.0204787	0.343826	0.942673	-0.0126605	0.0571725	0.084321	FALSE
YGL211W	NCS6	chrVII_96869_G_A_15986	-0.0138323	0.900018	0.704693	0.0661402	6.12394e-33	3.97917e-32	FALSE
YGL212W	VAM7	chrVII_87769_A_G_15954	0.694469	31.1998	0	0.00404239	0.678295	0.737776	FALSE
YGL213C	SKI8	chrVII_87769_A_G_15954	-0.00355364	2.43539	0.14672	-0.0206197	3.46199e-05	7.61958e-05	FALSE
YGL215W	CLG1	chrVII_87769_A_G_15954	0.0495204	2.53848	0.126584	-0.0922096	3.33214e-18	1.42294e-17	FALSE
YGL216W	KIP3	chrVII_87769_A_G_15954	-0.00140686	0.868297	0.721701	-0.122686	2.82745e-49	2.62884e-48	FALSE
YGL219C	MDM34	chrVII_82858_A_G_15928	-0.0573829	0.726759	0.786497	-0.117077	4.68278e-30	2.84853e-29	FALSE
YGL220W	BOL2	chrVII_82858_A_G_15928	-0.0216735	1.59926	0.392717	-0.0424815	4.40656e-10	1.34598e-09	FALSE
YGL221C	NIF3	chrVII_82858_A_G_15928	-0.0403301	2.5563	0.123403	-0.0566671	1.57137e-22	7.74578e-22	FALSE
YGL222C	EDC1	chrVII_80653_G_A_15921	0.219442	3.02145	0.0655797	-0.198902	4.23585e-59	4.88318e-58	FALSE
YGL223C	COG1	chrVII_80653_G_A_15921	1.37325	99.3445	0	0.0385288	1.71772e-08	4.83839e-08	FALSE
YGL226C-A	OST5	chrVII_73453_A_G_15856	-0.024443	1.28555	0.530228	-0.0197336	0.0421454	0.0635684	FALSE
YGL226W	MTC3	chrVII_73453_A_G_15856	-0.150251	7.8461	0	-0.0869198	6.10153e-21	2.86206e-20	FALSE
YGL228W	SHE10	chrVII_68542_T_C_15835	0.0012074	0.367671	0.936945	-0.00557092	0.307393	0.381688	FALSE
YGL229C	SAP4	chrVII_68542_T_C_15835	0.0199083	1.36368	0.497627	-0.0474894	0.0032986	0.00585758	FALSE
YGL231C	EMC4	chrVII_68542_T_C_15835	0.00917051	1.38801	0.487114	-0.00604636	0.313297	0.388176	FALSE
YGL232W	TAN1	chrVII_68542_T_C_15835	-0.0189712	1.09561	0.613701	-0.017233	0.00561412	0.00968664	FALSE
YGL233W	SEC15	chrVII_54324_G_C_15789	0.0092992	0.806164	0.751766	-0.0292467	1.24606e-05	2.84658e-05	FALSE
YGL234W	ADE5,7	chrVII_54324_G_C_15789	0.00392993	0.555377	0.863287	0.0510313	8.45834e-08	2.27706e-07	FALSE
YGL236C	MTO1	chrVII_54324_G_C_15789	0.19332	3.92636	0.0125231	0.119647	3.81241e-28	2.18431e-27	FALSE
YGL241W	KAP114	chrVII_44796_A_G_15747	0.169567	2.73476	0.0951	0.0372425	8.50514e-10	2.55825e-09	FALSE
YGL242C	YGL242C	chrVII_44796_A_G_15747	-0.0552379	1.81405	0.309969	-0.0106476	0.210446	0.275551	FALSE
YGL243W	TAD1	chrVII_44796_A_G_15747	0.0158332	0.757513	0.77327	-0.0152307	0.025506	0.0399461	FALSE
YGL244W	RTF1	chrVII_44796_A_G_15747	0.0149452	0.399869	0.926706	-0.0230064	3.50525e-05	7.70886e-05	FALSE
YGL245W	GUS1	chrVII_44796_A_G_15747	-0.00999255	0.608858	0.840488	0.00196334	0.690492	0.748313	FALSE
YGL246C	RAI1	chrVII_34702_C_A_15733	-0.0175673	0.325297	0.947817	0.0126348	0.036899	0.0562336	FALSE
YGL247W	BRR6	chrVII_34702_C_A_15733	0.1104	2.21238	0.19255	0.018025	0.0710215	0.10284	FALSE
YGL248W	PDE1	chrVII_34702_C_A_15733	-0.0793038	3.03611	0.0635602	-0.0772338	2.47667e-14	9.24386e-14	FALSE
YGL249W	ZIP2	chrVII_34702_C_A_15733	0.0505957	0.205236	0.982843				FALSE
YGL250W	RMR1	chrVII_34702_C_A_15733	0.0699369	2.5277	0.129525	0.0171624	0.208799	0.273707	FALSE
YGL251C	HFM1	chrVII_25663_A_G_15721	0.147124	0.717043	0.791608	0.261101	4.34352e-42	3.46875e-41	FALSE
YGL252C	RTG2	chrVII_25663_A_G_15721	0.119762	7.95386	0	0.11278	1.43123e-81	2.3118e-80	FALSE
YGL253W	HXK2	chrVII_23877_T_C_15714	-0.213073	82.4313	0	-0.274031	9.85014e-70	1.31289e-68	FALSE
YGL255W	ZRT1	chrVII_23877_T_C_15714	-0.192077	180.254	0	-0.0385034	0.261524	0.332088	FALSE
YGL261C	PAU11	chrVII_2283_C_A_15250	-0.0964054	0.839537	0.737938				FALSE
YGL262W	YGL262W	chrVII_2283_C_A_15250	0.470726	2.99039	0.0694255				FALSE
YGL263W	COS12	chrVII_2283_C_A_15250	-0.298271	4.33331	0.00686605	0.078393	0.0364783	0.0556369	FALSE
YGR001C	EFM5	chrVII_497059_T_C_17719	-0.040292	2.43999	0.146247	-0.0625625	1.11032e-35	7.78043e-35	FALSE
YGR002C	SWC4	chrVII_500260_C_A_17740	-0.0508255	1.02516	0.646593	0.00750486	0.24278	0.311189	FALSE
YGR003W	CUL3	chrVII_500260_C_A_17740	0.242082	2.94183	0.0749077	0.0893965	6.96583e-41	5.43392e-40	FALSE
YGR004W	PEX31	chrVII_504753_T_C_17764	-0.173277	1.87806	0.287434	0.0216889	0.000438025	0.000865755	FALSE
YGR005C	TFG2	chrVII_504753_T_C_17764	-0.00934202	0.535693	0.872069	-0.0368163	5.98143e-09	1.72215e-08	FALSE
YGR010W	NMA2	chrVII_511938_G_A_17791	0.0879704	1.10505	0.609587	-0.0255979	0.00744222	0.0126462	FALSE
YGR011W	YGR011W	chrVII_511938_G_A_17791	-0.0853331	3.5469	0.024919	-0.0313442	0.0087904	0.0147747	FALSE
YGR012W	MCY1	chrVII_511938_G_A_17791	0.132844	3.74274	0.0194444	0.0273962	9.30334e-07	2.32502e-06	FALSE
YGR013W	SNU71	chrVII_511938_G_A_17791	0.146458	5.05889	0.0017991	0.0405891	3.82889e-09	1.11531e-08	FALSE
YGR014W	MSB2	chrVII_521004_T_C_17816	0.000851144	1.01262	0.65264	-0.00769734	0.531371	0.604261	FALSE
YGR015C	YGR015C	chrVII_521004_T_C_17816	-0.142827	2.79788	0.0877382	-0.0382142	4.517e-07	1.15511e-06	FALSE
YGR016W	YGR016W	chrVII_521004_T_C_17816	-0.284678	1.88565	0.284767	-0.0108475	0.377061	0.454571	FALSE
YGR017W	YGR017W	chrVII_526005_A_G_17838	0.037187	1.64689	0.37537	0.00684024	0.321203	0.39694	FALSE
YGR019W	UGA1	chrVII_526005_A_G_17838	0.0646636	4.33388	0.00685285	0.0779299	4.85994e-10	1.48051e-09	FALSE
YGR026W	YGR026W	chrVII_534011_T_C_17870	-0.0114146	0.512468	0.8809	-0.055553	1.28648e-14	4.84912e-14	FALSE
YGR027C	RPS25A	chrVII_534011_T_C_17870	0.00184727	0.774161	0.767275	0.0319106	8.10371e-07	2.03144e-06	FALSE
YGR028W	MSP1	chrVII_544222_C_T_17914	0.0519127	1.33108	0.511257	0.0343471	0.00366405	0.00646836	FALSE
YGR029W	ERV1	chrVII_544222_C_T_17914	0.0459882	2.41003	0.150957	0.0219751	0.00201511	0.00368834	FALSE
YGR039W	YGR039W	chrVII_579120_T_C_18070	-0.870605	5.98946	0.000403226	-0.535871	2.22982e-64	2.78387e-63	FALSE
YGR040W	KSS1	chrVII_579120_T_C_18070	0.0562102	2.00611	0.244697	-0.10193	1.52435e-36	1.0909e-35	FALSE
YGR041W	BUD9	chrVII_579120_T_C_18070	0.33977	10.2477	0	0.0954368	2.00686e-23	1.01282e-22	FALSE
YGR042W	MTE1	chrVII_580178_G_T_18072	0.103873	2.412	0.150723	0.00724944	0.345577	0.422676	FALSE
YGR043C	NQM1	chrVII_580178_G_T_18072	-0.0599978	1.35096	0.502238	-0.22918	9.36844e-09	2.66909e-08	FALSE
YGR048W	UFD1	chrVII_591253_C_T_18086	0.0312517	1.62745	0.381299	-0.032806	8.69281e-05	0.000184573	FALSE
YGR049W	SCM4	chrVII_591253_C_T_18086	0.289197	7.198	0.000403226	0.509729	8.16441e-69	1.06829e-67	FALSE
YGR050C	YGR050C	chrVII_591253_C_T_18086	-0.0381842	0.565439	0.857631	0.132524	3.79995e-18	1.61667e-17	FALSE
YGR052W	FMP48	chrVII_591253_C_T_18086	-0.283361	2.86982	0.0803607	-0.278429	2.03512e-13	7.27301e-13	FALSE
YGR053C	YGR053C	chrVII_597251_T_C_18103	-0.0973727	0.976453	0.667058	-0.00379066	0.846764	0.878092	FALSE
YGR054W	YGR054W	chrVII_597251_T_C_18103	0.0438344	2.4667	0.142075	0.0272874	3.79056e-05	8.28849e-05	FALSE
YGR055W	MUP1	chrVII_601612_T_A_18111	0.0390162	1.66351	0.368104	0.444636	1.3983e-38	1.0479e-37	FALSE
YGR056W	RSC1	chrVII_601612_T_A_18111	-0.0584982	0.577579	0.852282	-0.00479753	0.421691	0.499322	FALSE
YGR057C	LST7	chrVII_601612_T_A_18111	0.240598	2.85382	0.0813871	0.00830625	0.419848	0.497244	FALSE
YGR060W	ERG25	chrVII_611358_T_C_18120	-0.0267995	1.6928	0.355309	-0.0446235	0.00066612	0.00128331	FALSE
YGR061C	ADE6	chrVII_611358_T_C_18120	0.0305225	3.1414	0.051938	-0.00580633	0.57237	0.640973	FALSE
YGR062C	COX18	chrVII_611358_T_C_18120	-0.0787325	1.17346	0.579216	-0.0380269	0.000112619	0.000236228	FALSE
YGR063C	SPT4	chrVII_622738_C_T_18132	-0.0345941	1.6297	0.38051	-0.0306208	2.55015e-06	6.17086e-06	FALSE
YGR064W	YGR064W	chrVII_622738_C_T_18132	-0.156839	0.774326	0.7672	-0.0833189	0.00344183	0.00609488	FALSE
YGR065C	VHT1	chrVII_622738_C_T_18132	0.0431881	1.63948	0.37786	0.0659905	0.00194709	0.003573	FALSE
YGR066C	YGR066C	chrVII_622738_C_T_18132	0.0876758	1.46367	0.451948	-0.0525635	0.0922047	0.131021	FALSE
YGR067C	YGR067C	chrVII_622738_C_T_18132	0.113273	1.6577	0.37066	-0.0046549	0.762083	0.808309	FALSE
YGR071C	ENV11	chrVII_634684_C_G_18146	0.0634335	0.377376	0.932966	-0.0313244	2.13203e-05	4.77701e-05	FALSE
YGR072W	UPF3	chrVII_634684_C_G_18146	0.00721296	0.488395	0.891175	0.0219423	0.000569648	0.00110979	FALSE
YGR073C	YGR073C	chrVII_634684_C_G_18146	-0.0274321	1.05403	0.634744	-0.00820033	0.569113	0.637951	FALSE
YGR074W	SMD1	chrVII_634684_C_G_18146	0.0325299	0.563592	0.858661	-0.00639947	0.37093	0.448126	FALSE
YGR076C	MRPL25	chrVII_638787_T_C_18148	-0.000217022	1.3182	0.516173	0.00615823	0.558715	0.629134	FALSE
YGR077C	PEX8	chrVII_638787_T_C_18148	0.0500436	0.823408	0.744754	-0.0213708	0.00322492	0.00573207	FALSE
YGR078C	PAC10	chrVII_638787_T_C_18148	-0.066691	2.44866	0.145143	0.0285501	1.72817e-06	4.23199e-06	FALSE
YGR079W	YGR079W	chrVII_643082_G_T_18154	-0.00460722	0.481679	0.893666	0.0476953	0.000138084	0.000287114	FALSE
YGR080W	TWF1	chrVII_643082_G_T_18154	0.0322173	0.368206	0.936779	-0.00764814	0.384507	0.46198	FALSE
YGR081C	SLX9	chrVII_643082_G_T_18154	-0.0247971	1.22547	0.558408	0.00872447	0.279777	0.351906	FALSE
YGR082W	TOM20	chrVII_644412_A_G_18155	-0.00223194	0.392124	0.927996	0.0064739	0.243898	0.312343	FALSE
YGR083C	GCD2	chrVII_644412_A_G_18155	0.0624527	0.886855	0.712701	0.00873629	0.104654	0.146885	FALSE
YGR084C	MRP13	chrVII_647344_G_A_18157	0.0147991	0.522388	0.877371	-0.00637588	0.482166	0.556525	FALSE
YGR085C	RPL11B	chrVII_647344_G_A_18157	0.00844262	2.37376	0.159415	0.00776027	0.234646	0.302118	FALSE
YGR086C	PIL1	chrVII_651434_A_G_18167	-0.0277858	1.19936	0.572082	-0.00930843	0.416132	0.49366	FALSE
YGR087C	PDC6	chrVII_651434_A_G_18167	0.0178055	0.288255	0.961441	-0.0714541	0.0573483	0.0845367	FALSE
YGR088W	CTT1	chrVII_656248_T_G_18171	-0.0823111	1.43789	0.46375	-0.0962447	0.0318485	0.0489806	FALSE
YGR089W	NNF2	chrVII_656248_T_G_18171	0.0580609	0.656375	0.81793	0.0399066	2.64022e-09	7.75787e-09	FALSE
YGR090W	UTP22	chrVII_668528_C_T_18185	0.0641593	0.668052	0.812451	0.0214479	0.014457	0.0235379	FALSE
YGR091W	PRP31	chrVII_668528_C_T_18185	-0.00458345	0.265575	0.966809	0.00371149	0.578373	0.646492	FALSE
YGR092W	DBF2	chrVII_668528_C_T_18185	0.0123711	0.609134	0.840372	-0.0064179	0.451541	0.528085	FALSE
YGR093W	DRN1	chrVII_668528_C_T_18185	0.0459776	1.05852	0.63292	0.00561704	0.35901	0.435842	FALSE
YGR094W	VAS1	chrVII_676388_C_T_18193	0.0263975	0.990325	0.662159	0.0334378	1.04509e-06	2.59706e-06	FALSE
YGR095C	RRP46	chrVII_676388_C_T_18193	0.00625081	1.75855	0.331701	-0.00463215	0.434671	0.512636	FALSE
YGR096W	TPC1	chrVII_676388_C_T_18193	-0.053845	0.201936	0.983807	0.0138662	0.142574	0.195126	FALSE
YGR098C	ESP1	chrVII_690131_C_T_18205	-0.024068	0.733882	0.782769	0.0296868	0.00015025	0.000311165	FALSE
YGR099W	TEL2	chrVII_690131_C_T_18205	-0.0159792	0.791699	0.757719	0.00330207	0.589888	0.657297	FALSE
YGR100W	MDR1	chrVII_690131_C_T_18205	0.0424344	1.51486	0.431236	-0.00425818	0.543778	0.615707	FALSE
YGR101W	PCP1	chrVII_697548_G_A_18206	0.0243078	0.510708	0.881509	-0.00307241	0.723943	0.774898	FALSE
YGR102C	GTF1	chrVII_697548_G_A_18206	-0.0328405	0.863045	0.725347	-0.00454522	0.56376	0.633192	FALSE
YGR103W	NOP7	chrVII_697548_G_A_18206	0.00677382	0.754877	0.774375	0.0179165	0.0705766	0.102322	FALSE
YGR104C	SRB5	chrVII_697548_G_A_18206	-0.0201581	0.250676	0.970188	-0.00166599	0.814092	0.850254	FALSE
YGR105W	VMA21	chrVII_697548_G_A_18206	-0.00965331	0.239582	0.974114	-0.00335476	0.692211	0.749492	FALSE
YGR106C	VOA1	chrVII_697548_G_A_18206	0.00177186	0.265154	0.96688	-0.00940417	0.0683408	0.0994586	FALSE
YGR108W	CLB1	chrVII_705215_C_T_18213	-0.0451602	1.31949	0.515604	-0.0710982	1.27311e-10	4.0042e-10	FALSE
YGR109C	CLB6	chrVII_705215_C_T_18213	0.101493	1.03787	0.641189	0.0473731	0.00211424	0.00385499	FALSE
YGR111W	YGR111W	chrVII_719941_C_G_18231	-0.0542459	1.18709	0.576066	-0.039159	9.86803e-06	2.28074e-05	FALSE
YGR112W	SHY1	chrVII_719941_C_G_18231	-0.0233872	1.13323	0.597201	-0.0274788	0.0375537	0.0571553	FALSE
YGR113W	DAM1	chrVII_719941_C_G_18231	-0.0585271	2.42159	0.149378	-0.0237232	0.00162933	0.00301309	FALSE
YGR116W	SPT6	chrVII_719941_C_G_18231	0.0310925	1.17611	0.578342	-0.0232249	0.000848664	0.00161863	FALSE
YGR117C	YGR117C	chrVII_719941_C_G_18231	-0.0532234	0.322025	0.948706	-0.0367965	2.21985e-07	5.78536e-07	FALSE
YGR118W	RPS23A	chrVII_733088_G_T_18247	0.00361029	0.632511	0.829156	0.0149143	0.0142655	0.023263	FALSE
YGR119C	NUP57	chrVII_733088_G_T_18247	0.0351219	2.2399	0.186747	0.00740104	0.0962927	0.13645	FALSE
YGR120C	COG2	chrVII_733088_G_T_18247	-0.0973925	1.3513	0.502121	-0.0282806	7.18742e-05	0.0001533	FALSE
YGR121C	MEP1	chrVII_733088_G_T_18247	0.0832602	2.99401	0.0690089	0.0888957	1.20145e-08	3.40093e-08	FALSE
YGR121W-A	YGR121W-A	chrVII_733088_G_T_18247	0.361513	2.2625	0.183853				FALSE
YGR122C-A	YGR122C-A	chrVII_734668_A_T_18248	0.390934	1.69108	0.356121	-0.0354342	0.509092	0.58278	FALSE
YGR122W	YGR122W	chrVII_734668_A_T_18248	0.183732	1.32589	0.513152	-0.0450336	1.51342e-05	3.42451e-05	FALSE
YGR127W	YGR127W	chrVII_748014_A_G_18256	0.00669603	0.395064	0.927507	0.0142016	0.226674	0.293041	FALSE
YGR128C	UTP8	chrVII_748014_A_G_18256	0.0573543	2.78631	0.0897928	-0.0131776	0.179828	0.239296	FALSE
YGR129W	SYF2	chrVII_748014_A_G_18256	-0.0593786	1.55099	0.415172	0.00510298	0.580884	0.648983	FALSE
YGR130C	YGR130C	chrVII_748014_A_G_18256	-0.00836315	0.599499	0.844387	-0.0275485	0.0632568	0.0925781	FALSE
YGR131W	FHN1	chrVII_748014_A_G_18256	0.245834	3.7322	0.0194842	0.178757	1.37952e-12	4.75186e-12	FALSE
YGR132C	PHB1	chrVII_748014_A_G_18256	0.00264715	0.714799	0.792845	-0.00806181	0.308142	0.382535	FALSE
YGR133W	PEX4	chrVII_766068_A_G_18267	-0.00543363	1.22289	0.560127	-0.00203347	0.809236	0.846235	FALSE
YGR134W	CAF130	chrVII_766068_A_G_18267	-0.0758753	1.45392	0.456322	0.00371673	0.543102	0.615185	FALSE
YGR135W	PRE9	chrVII_766068_A_G_18267	-0.0114669	1.21424	0.564948	-0.00633784	0.227794	0.294223	FALSE
YGR137W	YGR137W	chrVII_766068_A_G_18267	0.0155726	2.43959	0.146289	0.014175	0.153247	0.208188	FALSE
YGR138C	TPO2	chrVII_766068_A_G_18267	-0.0141985	0.702283	0.798743	-0.00839907	0.561579	0.63161	FALSE
YGR140W	CBF2	chrVII_766068_A_G_18267	-0.0439187	1.21141	0.566372	0.0165233	0.0216426	0.0342899	FALSE
YGR141W	VPS62	chrVII_766068_A_G_18267	-0.043198	3.63507	0.0228986	-0.0122181	0.173522	0.232094	FALSE
YGR142W	BTN2	chrVII_779852_C_T_18273	-0.00487751	1.01378	0.651959	-0.0228007	0.178225	0.237606	FALSE
YGR143W	SKN1	chrVII_779852_C_T_18273	-0.0484463	0.55003	0.866321	-0.00983145	0.440888	0.518511	FALSE
YGR144W	THI4	chrVII_779852_C_T_18273	-0.0970102	1.29464	0.526694	-0.0649728	0.0191503	0.0305614	FALSE
YGR145W	ENP2	chrVII_779852_C_T_18273	0.00141297	1.90283	0.278662	0.000178269	0.986869	0.990333	FALSE
YGR146C	ECL1	chrVII_785945_G_T_18276	-0.0105455	0.929787	0.690208	0.0879552	0.000480816	0.00094771	FALSE
YGR146C-A	YGR146C-A	chrVII_785945_G_T_18276	0.0424097	1.35734	0.50004				FALSE
YGR147C	NAT2	chrVII_785945_G_T_18276	0.0245397	0.344504	0.942536	-0.0400353	2.35741e-10	7.30211e-10	FALSE
YGR148C	RPL24B	chrVII_785945_G_T_18276	0.00439042	0.36092	0.93905	0.0164439	0.0136225	0.0222871	FALSE
YGR149W	GPC1	chrVII_785945_G_T_18276	-0.00194209	1.2305	0.555166	-0.0610213	2.06955e-07	5.40105e-07	FALSE
YGR150C	CCM1	chrVII_794614_C_A_18352	0.0333732	2.38499	0.157206	-0.0232414	0.00137768	0.0025685	FALSE
YGR151C	YGR151C	chrVII_794614_C_A_18352	0.0041894	1.61263	0.386843	0.112857	3.19369e-24	1.65113e-23	FALSE
YGR152C	RSR1	chrVII_794614_C_A_18352	-0.00126342	0.426554	0.916127	0.0204924	0.0165917	0.0267469	FALSE
YGR153W	YGR153W	chrVII_797305_T_C_18375	-0.0859432	2.53406	0.127823	-0.00203976	0.886769	0.911477	FALSE
YGR154C	GTO1	chrVII_797305_T_C_18375	0.168219	3.9668	0.0114286	0.0562968	0.000492414	0.000968566	FALSE
YGR158C	MTR3	chrVII_805132_A_C_18424	0.0375172	0.705138	0.797539	0.071611	1.1896e-23	6.04096e-23	FALSE
YGR159C	NSR1	chrVII_805132_A_C_18424	-0.00525117	1.84903	0.299085	0.0288453	0.0201297	0.0319904	FALSE
YGR162W	TIF4631	chrVII_827191_T_C_18492	0.0360747	0.707661	0.796475	0.011854	0.195988	0.258396	FALSE
YGR163W	GTR2	chrVII_827191_T_C_18492	-0.0233499	0.719722	0.790132	-0.0129555	0.041196	0.0621855	FALSE
YGR165W	MRPS35	chrVII_832207_G_A_18495	-0.00990756	0.747556	0.777176	-0.0419326	0.000243995	0.000495266	FALSE
YGR166W	TRS65	chrVII_832207_G_A_18495	-0.0235313	2.26686	0.182351	-0.0388737	3.32424e-08	9.18705e-08	FALSE
YGR167W	CLC1	chrVII_832207_G_A_18495	0.00632993	0.627693	0.831208	0.0801763	1.12123e-34	7.69648e-34	FALSE
YGR168C	YGR168C	chrVII_832207_G_A_18495	-0.168733	3.66469	0.0210504	-0.0375586	0.000363005	0.000724237	FALSE
YGR169C	PUS6	chrVII_837414_A_C_18514	-0.0106786	0.843753	0.735527	0.0340027	0.000839809	0.00160281	FALSE
YGR169C-A	LSO2	chrVII_837414_A_C_18514	0.00187922	0.377203	0.933043	0.00125022	0.893009	0.916243	FALSE
YGR170W	PSD2	chrVII_837414_A_C_18514	0.0764684	1.55846	0.411501	-0.0170389	0.00763066	0.0129357	FALSE
YGR171C	MSM1	chrVII_837414_A_C_18514	-0.0909979	1.19585	0.573423	-0.00400056	0.626015	0.690668	FALSE
YGR172C	YIP1	chrVII_848849_C_T_18530	0.0158608	3.38759	0.0342469	-0.00692796	0.253904	0.32349	FALSE
YGR173W	RBG2	chrVII_848849_C_T_18530	0.00481416	1.3705	0.494858	0.0101178	0.099347	0.140229	FALSE
YGR174C	CBP4	chrVII_848849_C_T_18530	-0.0856919	1.63747	0.378399	-0.0172349	0.301201	0.374813	FALSE
YGR174W-A	YGR174W-A	chrVII_848849_C_T_18530	-0.230049	0.578932	0.851781				FALSE
YGR175C	ERG1	chrVII_848849_C_T_18530	0.00555291	0.331535	0.946065	-0.0258603	0.00269857	0.00485539	FALSE
YGR177C	ATF2	chrVII_848849_C_T_18530	-0.0283489	0.607056	0.841239	-0.0683283	4.72291e-07	1.20615e-06	FALSE
YGR179C	OKP1	chrVII_855417_G_A_18568	-0.110414	1.76443	0.329137	-0.0698984	1.15734e-19	5.19847e-19	FALSE
YGR180C	RNR4	chrVII_855417_G_A_18568	0.00443694	1.67163	0.364801	-0.177557	1.28267e-41	1.01443e-40	FALSE
YGR181W	TIM13	chrVII_858478_G_C_18591	-0.142706	16.7569	0	0.181571	1.17885e-105	2.54365e-104	FALSE
YGR182C	YGR182C	chrVII_858478_G_C_18591	-0.254866	3.96821	0.0114286	0.0268638	0.119016	0.165378	FALSE
YGR183C	QCR9	chrVII_858478_G_C_18591	-0.00388492	0.771034	0.768691	-0.169112	8.64766e-29	5.05596e-28	FALSE
YGR184C	UBR1	chrVII_858478_G_C_18591	0.122016	3.70618	0.0196622	0.205581	1.19655e-89	2.15833e-88	FALSE
YGR185C	TYS1	chrVII_867732_G_A_18672	0.0152407	2.32185	0.170037	-0.0170151	0.000190878	0.000391899	FALSE
YGR186W	TFG1	chrVII_867732_G_A_18672	-0.019839	0.958779	0.676242	-0.0267347	1.11501e-08	3.16094e-08	FALSE
YGR193C	PDX1	chrVII_885001_C_T_18834	-0.0653497	4.80935	0.0017991	-0.0367534	6.21186e-09	1.7849e-08	FALSE
YGR194C	XKS1	chrVII_885001_C_T_18834	0.0720875	0.939212	0.685612	-0.0738344	3.2189e-05	7.11193e-05	FALSE
YGR195W	SKI6	chrVII_889615_C_T_18864	0.0448474	1.02275	0.647385	-0.0214357	0.000164798	0.000340186	FALSE
YGR196C	FYV8	chrVII_889615_C_T_18864	0.01177	0.768249	0.769697	-0.0371781	3.35107e-10	1.02853e-09	FALSE
YGR197C	SNG1	chrVII_895001_C_T_18895	0.130538	2.7814	0.090771	0.0832261	4.77793e-16	1.90252e-15	FALSE
YGR198W	YPP1	chrVII_895001_C_T_18895	0.0578376	2.34277	0.165372	0.0503432	8.95003e-16	3.52697e-15	FALSE
YGR199W	PMT6	chrVII_899896_G_A_18918	0.042838	0.657263	0.817452	-0.0170889	0.00426288	0.00746559	FALSE
YGR200C	ELP2	chrVII_899896_G_A_18918	-0.149437	4.74827	0.0028777	-0.0314735	2.20697e-05	4.93718e-05	FALSE
YGR208W	SER2	chrVII_912826_A_G_18991	-0.168128	23.8514	0	-0.0161673	0.0497082	0.0741152	FALSE
YGR209C	TRX2	chrVII_912826_A_G_18991	-0.0108414	1.49515	0.436522	-0.0624699	1.67036e-13	5.99568e-13	FALSE
YGR211W	ZPR1	chrVII_916672_C_T_19011	0.183404	10.9681	0	0.0192313	0.0173408	0.0278603	FALSE
YGR212W	SLI1	chrVII_916672_C_T_19011	-0.225485	1.18823	0.575907	-0.00987693	0.290115	0.362993	FALSE
YGR214W	RPS0A	chrVII_916672_C_T_19011	-0.0175925	2.23284	0.188453	-0.0140744	0.0167029	0.0269034	FALSE
YGR215W	RSM27	chrVII_916672_C_T_19011	-0.0289397	0.921736	0.693296	-0.0182084	0.0273519	0.0426269	FALSE
YGR216C	GPI1	chrVII_916672_C_T_19011	-0.00382731	0.526397	0.875822	-0.00156154	0.818026	0.853398	FALSE
YGR217W	CCH1	chrVII_935861_T_A_19082	0.0509877	1.35778	0.499888	-0.0028763	0.711216	0.765287	FALSE
YGR218W	CRM1	chrVII_935861_T_A_19082	0.114202	2.6603	0.10621	-0.0113835	0.0596524	0.0876393	FALSE
YGR220C	MRPL9	chrVII_935861_T_A_19082	-0.0324441	0.713488	0.793567	0.0065721	0.396035	0.473157	FALSE
YGR221C	TOS2	chrVII_935861_T_A_19082	0.0936662	1.22869	0.55625	0.0130957	0.226042	0.292423	FALSE
YGR227W	DIE2	chrVII_952076_A_G_19162	0.213451	3.14766	0.0513709	0.0790885	6.11697e-24	3.13132e-23	FALSE
YGR229C	SMI1	chrVII_952076_A_G_19162	0.481084	35.3672	0	0.0105299	0.0686758	0.0998191	FALSE
YGR230W	BNS1	chrVII_952076_A_G_19162	-0.074623	1.89694	0.280754	-0.146665	9.34812e-20	4.21218e-19	FALSE
YGR231C	PHB2	chrVII_952076_A_G_19162	-0.000230161	2.287	0.17608	-0.00341661	0.617995	0.683897	FALSE
YGR234W	YHB1	chrVII_960936_A_G_19251	0.438166	109.121	0	0.386901	6.83447e-19	2.9923e-18	FALSE
YGR235C	MIC26	chrVII_960936_A_G_19251	-0.0174282	0.543208	0.869018	-0.0633103	1.60188e-20	7.39865e-20	FALSE
YGR236C	SPG1	chrVII_960936_A_G_19251	0.187483	1.35433	0.501076	-0.186754	1.40537e-05	3.19393e-05	FALSE
YGR237C	YGR237C	chrVII_967795_T_C_19267	0.0220027	0.0748927	0.998059	-0.0378814	0.00215072	0.00391933	FALSE
YGR238C	KEL2	chrVII_967795_T_C_19267	-0.0599671	1.19825	0.572503	-0.0414701	1.73784e-08	4.89025e-08	FALSE
YGR239C	PEX21	chrVII_967795_T_C_19267	-0.0544151	1.81057	0.311303	-0.0840359	5.0546e-18	2.14408e-17	FALSE
YGR240C	PFK1	chrVII_974639_C_T_19280	-0.0507487	4.76878	0.00263165	0.00930311	0.269287	0.340283	FALSE
YGR241C	YAP1802	chrVII_974639_C_T_19280	-0.0512165	3.19089	0.0487695	-0.00981203	0.23871	0.306798	FALSE
YGR244C	LSC2	chrVII_979683_A_C_19290	0.0174771	0.876178	0.717203	0.0561224	1.9046e-06	4.65407e-06	FALSE
YGR245C	SDA1	chrVII_979683_A_C_19290	-0.0175004	0.803116	0.752795	0.0059505	0.585235	0.652863	FALSE
YGR246C	BRF1	chrVII_979683_A_C_19290	-0.106093	2.74738	0.0937709	-0.0674648	1.05872e-29	6.39259e-29	FALSE
YGR247W	CPD1	chrVII_987590_C_T_19350	-0.227763	5.5229	0.000653595	0.0458904	5.7973e-07	1.46872e-06	FALSE
YGR248W	SOL4	chrVII_987590_C_T_19350	-0.870798	117.894	0	-0.497429	3.11888e-40	2.39379e-39	FALSE
YGR252W	GCN5	chrVII_998284_C_T_19468	-0.101606	2.81542	0.0851463	-0.0556923	1.00775e-21	4.83824e-21	FALSE
YGR253C	PUP2	chrVII_998284_C_T_19468	-0.0155663	0.568537	0.855903	-7.50548e-05	0.988057	0.991003	FALSE
YGR254W	ENO1	chrVII_1001397_T_A_19488	0.0477007	5.28793	0.000653595	0.0707125	1.07273e-06	2.6611e-06	FALSE
YGR255C	COQ6	chrVII_1001397_T_A_19488	-0.182664	2.495	0.136492	-0.0106629	0.33476	0.411293	FALSE
YGR256W	GND2	chrVII_1006351_A_G_19517	0.0912077	3.13014	0.0530897	0.188128	6.73002e-06	1.57779e-05	FALSE
YGR257C	MTM1	chrVII_1006351_A_G_19517	0.00199599	0.926386	0.691513	0.0252018	0.00105779	0.00200014	FALSE
YGR260W	TNA1	chrVII_1013000_C_G_19552	-0.072497	2.04764	0.233693	-0.0134678	0.155632	0.211027	FALSE
YGR261C	APL6	chrVII_1013000_C_G_19552	0.0195373	0.443623	0.909575	0.0289708	8.91505e-09	2.54627e-08	FALSE
YGR262C	BUD32	chrVII_1019203_A_G_19555	0.0449999	1.80609	0.312793	-0.0356457	2.27465e-09	6.69057e-09	FALSE
YGR263C	SAY1	chrVII_1019203_A_G_19555	0.0020649	1.03554	0.642317	0.0390193	5.85947e-07	1.48315e-06	FALSE
YGR264C	MES1	chrVII_1019203_A_G_19555	-0.00757919	1.07736	0.62285	0.00567617	0.417532	0.495115	FALSE
YGR266W	YGR266W	chrVII_1026093_A_G_19559	0.0881143	1.04718	0.637444	0.00461088	0.734144	0.783763	FALSE
YGR267C	FOL2	chrVII_1026093_A_G_19559	0.0474931	2.36819	0.160335	0.048094	3.85383e-16	1.53777e-15	FALSE
YGR268C	HUA1	chrVII_1026093_A_G_19559	0.0376169	0.369942	0.936237	-0.00153078	0.882615	0.907534	FALSE
YGR270W	YTA7	chrVII_1026093_A_G_19559	0.0171765	1.62337	0.382729	0.00758863	0.212472	0.277631	FALSE
YGR271C-A	EFG1	chrVII_1042694_A_G_19573	0.0273782	2.24516	0.186521	0.0456401	3.26125e-05	7.1986e-05	FALSE
YGR271W	SLH1	chrVII_1042694_A_G_19573	0.00894557	0.288778	0.961318	-0.0229635	0.00496036	0.00862894	FALSE
YGR274C	TAF1	chrVII_1042694_A_G_19573	0.122433	3.22453	0.0457467	-0.00597897	0.248294	0.317474	FALSE
YGR275W	RTT102	chrVII_1042694_A_G_19573	-0.124862	1.89246	0.282398	0.0112899	0.0924083	0.131277	FALSE
YGR276C	RNH70	chrVII_1042694_A_G_19573	0.000646673	0.78393	0.762225	0.00344187	0.518279	0.591875	FALSE
YGR277C	CAB4	chrVII_1042694_A_G_19573	0.0255687	0.853723	0.730341	0.00943717	0.139734	0.191468	FALSE
YGR278W	CWC22	chrVII_1050332_G_T_19591	-0.249986	6.83876	0.000403226	-0.102371	2.91726e-48	2.64356e-47	FALSE
YGR279C	SCW4	chrVII_1050332_G_T_19591	-0.207259	46.3179	0	-0.406983	3.65746e-171	1.49381e-169	FALSE
YGR280C	PXR1	chrVII_1050332_G_T_19591	0.141786	9.18596	0	0.040135	0.000114857	0.000240745	FALSE
YGR281W	YOR1	chrVII_1057780_C_T_19627	-0.134057	2.58137	0.119434	0.124423	2.50946e-22	1.23063e-21	FALSE
YGR282C	BGL2	chrVII_1057780_C_T_19627	-0.204918	190.055	0	-0.198444	1.78265e-127	4.87712e-126	TRUE
YGR285C	ZUO1	chrVII_1063846_T_C_19679	-0.0414299	5.58507	0.000403226	-0.0280519	2.28822e-07	5.96084e-07	FALSE
YGR286C	BIO2	chrVII_1063846_T_C_19679	0.210096	8.42525	0	0.203	2.79713e-14	1.04128e-13	FALSE
YGR287C	IMA1	chrVII_1067171_C_A_19715	1.47916	158.381	0	0.538265	6.27859e-143	1.9945e-141	TRUE
YGR289C	MAL11	chrVII_1067171_C_A_19715	-0.499332	7.88467	0	-0.182847	4.35034e-21	2.04734e-20	FALSE
YGR290W	YGR290W	chrVII_1067171_C_A_19715	1.58739	18.569	0				FALSE
YGR295C	COS6	chrVII_1067171_C_A_19715	-1.54261	250.36	0	-2.14944	5.88929e-281	5.80603e-279	FALSE
YHL001W	RPL14B	chrVIII_105424_G_T_20498	0.021017	2.44575	0.145515	0.0697223	2.77284e-10	8.54723e-10	FALSE
YHL003C	LAG1	chrVIII_100241_A_G_20472	-0.273033	35.489	0	-0.131104	9.52849e-91	1.73516e-89	FALSE
YHL004W	MRP4	chrVIII_100241_A_G_20472	-0.401611	21.3833	0	-0.0190317	0.045267	0.0679493	FALSE
YHL006C	SHU1	chrVIII_97536_T_C_20454	-0.0773988	2.31345	0.171042	-0.181846	1.66118e-35	1.1612e-34	FALSE
YHL007C	STE20	chrVIII_97536_T_C_20454	0.058402	1.63708	0.378504	0.042637	9.23031e-10	2.76764e-09	FALSE
YHL011C	PRS3	chrVIII_80498_A_G_20307	0.0353361	1.92605	0.272086	0.0252187	5.60371e-05	0.000120868	FALSE
YHL013C	OTU2	chrVIII_80498_A_G_20307	-0.0651944	1.7482	0.335059	-0.0454751	1.94958e-10	6.07834e-10	FALSE
YHL014C	YLF2	chrVIII_74739_C_T_20275	0.0841882	0.919848	0.694041	-0.0396216	5.63674e-06	1.33185e-05	FALSE
YHL015W	RPS20	chrVIII_74739_C_T_20275	0.227802	50.2786	0	0.00945782	0.173003	0.231616	FALSE
YHL016C	DUR3	chrVIII_71885_T_C_20265	-0.598752	11.2224	0	-0.603413	3.37712e-121	8.62071e-120	FALSE
YHL017W	YHL017W	chrVIII_71885_T_C_20265	-0.0660633	0.692834	0.802941	-0.0689156	1.39964e-32	9.01252e-32	FALSE
YHL019W-A	YHL019W-A	chrVIII_67629_G_T_20244	0.227422	2.9052	0.0767655	0.0507301	0.0482164	0.07206	FALSE
YHL020C	OPI1	chrVIII_67629_G_T_20244	0.175304	30.2406	0	0.148542	8.58693e-114	2.06303e-112	FALSE
YHL021C	AIM17	chrVIII_67629_G_T_20244	0.163392	1.18864	0.575849	-0.00440901	0.882218	0.907521	FALSE
YHL022C	SPO11	chrVIII_67629_G_T_20244	-1.90986	48.1196	0	-1.45858	0	0	FALSE
YHL023C	NPR3	chrVIII_55457_G_C_20150	-0.242318	6.27164	0.000403226	-0.0479712	2.26714e-17	9.38026e-17	FALSE
YHL024W	RIM4	chrVIII_55457_G_C_20150	0.462973	3.39331	0.0339134	0.210151	2.15891e-07	5.63169e-07	FALSE
YHL025W	SNF6	chrVIII_55457_G_C_20150	-0.0306303	0.88431	0.713611	-0.0745444	5.37902e-33	3.51511e-32	FALSE
YHL026C	YHL026C	chrVIII_53770_T_C_20146	0.310461	9.07489	0	0.047962	9.59778e-06	2.22277e-05	FALSE
YHL027W	RIM101	chrVIII_53770_T_C_20146	-0.110793	5.33846	0.000653595	-0.134039	3.40241e-66	4.31374e-65	FALSE
YHL028W	WSC4	chrVIII_48214_G_A_20131	-0.10487	2.53129	0.1286	-0.101483	0.000134814	0.000280826	FALSE
YHL029C	OCA5	chrVIII_48214_G_A_20131	-0.0039189	1.64096	0.377394	-0.0150682	0.0156575	0.0253494	FALSE
YHL030W	ECM29	chrVIII_48214_G_A_20131	0.005941	2.58049	0.119531	-0.00177851	0.853485	0.883459	FALSE
YHL031C	GOS1	chrVIII_36805_G_A_20082	-0.0246764	0.995392	0.660824	-0.0390324	6.44978e-07	1.62538e-06	FALSE
YHL032C	GUT1	chrVIII_36805_G_A_20082	-0.022591	0.528199	0.875126	0.0652746	7.20491e-08	1.94972e-07	FALSE
YHL033C	RPL8A	chrVIII_36805_G_A_20082	0.0024891	1.92564	0.272206	0.00883728	0.244644	0.313228	FALSE
YHL035C	VMR1	chrVIII_27988_A_C_20056	-0.107406	7.61507	0	-0.178848	1.21914e-36	8.74662e-36	FALSE
YHL036W	MUP3	chrVIII_27988_A_C_20056	-0.0741239	1.38072	0.490692	0.0120602	0.450637	0.527156	FALSE
YHL038C	CBP2	chrVIII_27988_A_C_20056	0.00554465	0.966758	0.672266	-0.032329	2.96349e-06	7.13182e-06	FALSE
YHL039W	EFM1	chrVIII_27988_A_C_20056	-0.022404	0.561695	0.859719	-0.0176614	0.0244725	0.038475	FALSE
YHL040C	ARN1	chrVIII_27988_A_C_20056	0.0276358	1.88786	0.284024	-0.011616	0.500412	0.574339	FALSE
YHL044W	YHL044W	chrVIII_6581_G_A_19940	-0.905657	22.9718	0	-1.81097	0	0	FALSE
YHL047C	ARN2	chrVIII_6581_G_A_19940	-1.38145	1000.76	0	-3.55102	0	0	TRUE
YHL048W	COS8	chrVIII_6581_G_A_19940	-1.37016	242.13	0	-1.98213	0	0	FALSE
YHR001W	OSH7	chrVIII_105424_G_T_20498	0.0141347	1.99103	0.248389	0.0617135	1.06517e-15	4.18315e-15	FALSE
YHR002W	LEU5	chrVIII_110021_C_T_20521	0.0693445	1.74649	0.335842	0.024004	0.0262875	0.0410912	FALSE
YHR003C	TCD1	chrVIII_110021_C_T_20521	0.0633587	1.23376	0.553797	-0.0157387	0.00531823	0.00921783	FALSE
YHR004C	NEM1	chrVIII_113512_A_C_20530	0.4175	13.0103	0	0.0170476	0.0695998	0.101008	FALSE
YHR005C	GPA1	chrVIII_113512_A_C_20530	-0.192714	17.1172	0	-0.300789	2.32379e-144	7.42314e-143	FALSE
YHR005C-A	TIM10	chrVIII_113512_A_C_20530	-0.0136509	0.757865	0.773123	0.0152031	0.0522147	0.0776296	FALSE
YHR006W	STP2	chrVIII_121315_T_C_20552	-0.0301491	0.67578	0.809444	-0.00535873	0.366739	0.443812	FALSE
YHR007C	ERG11	chrVIII_121315_T_C_20552	0.268765	47.3386	0	0.213603	5.42986e-56	5.77099e-55	FALSE
YHR009C	TDA3	chrVIII_125040_A_G_20561	0.244489	16.6714	0	0.183087	5.80323e-80	9.11618e-79	FALSE
YHR010W	RPL27A	chrVIII_125040_A_G_20561	-0.0063658	1.16854	0.580998	-0.00952137	0.209813	0.274847	FALSE
YHR012W	VPS29	chrVIII_130538_T_C_20589	0.0754469	3.49519	0.0278002	-0.00382964	0.562779	0.632338	FALSE
YHR013C	ARD1	chrVIII_130538_T_C_20589	0.0652892	4.13364	0.00794872	0.113056	4.3027e-108	9.64817e-107	FALSE
YHR015W	MIP6	chrVIII_136896_G_A_20654	0.521063	2.05777	0.23146	0.507077	7.70909e-113	1.81402e-111	FALSE
YHR016C	YSC84	chrVIII_136896_G_A_20654	0.197698	12.5674	0	-0.00290089	0.850995	0.88152	FALSE
YHR018C	ARG4	chrVIII_142368_T_C_20673	-0.051197	3.91806	0.0132104	-0.0451022	9.36697e-05	0.000198372	FALSE
YHR019C	DED81	chrVIII_142368_T_C_20673	0.0268587	1.76071	0.330931	0.0057177	0.292794	0.365625	FALSE
YHR023W	MYO1	chrVIII_157616_A_G_20775	-0.0851705	3.41532	0.0320764	-0.0342885	3.30059e-05	7.27834e-05	FALSE
YHR024C	MAS2	chrVIII_157616_A_G_20775	0.0386926	1.15187	0.587943	-0.00933187	0.265682	0.336397	FALSE
YHR032W-A	YHR032W-A	chrVIII_175734_A_C_20910	0.0107305	1.04439	0.638499	-0.125155	0.0019601	0.00359342	FALSE
YHR033W	YHR033W	chrVIII_175734_A_C_20910	-1.71105	122.678	0	-1.04196	3.23193e-157	1.16963e-155	FALSE
YHR034C	PIH1	chrVIII_177049_A_G_20916	-0.0994927	1.92554	0.272237	-0.139193	1.30722e-73	1.8828e-72	FALSE
YHR035W	NEL1	chrVIII_177049_A_G_20916	0.393866	6.046	0.000403226	-0.0653276	2.17218e-10	6.75763e-10	FALSE
YHR036W	BRL1	chrVIII_182092_T_C_20960	0.0382785	1.53579	0.421539	0.0572489	4.1893e-17	1.72086e-16	FALSE
YHR037W	PUT2	chrVIII_182092_T_C_20960	0.176019	9.32518	0	0.115206	7.29828e-31	4.5164e-30	FALSE
YHR039C-A	VMA10	chrVIII_188007_G_A_21002	0.0336631	5.59751	0.000403226	0.0411699	6.02636e-16	2.38965e-15	FALSE
YHR040W	BCD1	chrVIII_188007_G_A_21002	0.052958	2.04867	0.233637	0.103069	2.6021e-32	1.6643e-31	FALSE
YHR043C	DOG2	chrVIII_192973_G_A_21028	-0.88387	156.335	0	-1.12076	0	0	TRUE
YHR044C	DOG1	chrVIII_192973_G_A_21028	-1.49807	75.8642	0	-0.514026	5.99689e-110	1.36614e-108	FALSE
YHR045W	YHR045W	chrVIII_198648_A_G_21061	0.0475372	0.664959	0.813807	0.111927	5.41867e-51	5.22495e-50	FALSE
YHR046C	INM1	chrVIII_198648_A_G_21061	0.448135	36.7875	0	0.178125	1.84913e-89	3.32495e-88	FALSE
YHR047C	AAP1	chrVIII_198648_A_G_21061	-0.0226854	1.16336	0.583277	0.00353561	0.708632	0.763374	FALSE
YHR049W	FSH1	chrVIII_209095_C_A_21077	0.0194859	1.17953	0.577214	-0.0129962	0.178172	0.237591	FALSE
YHR050W	SMF2	chrVIII_209095_C_A_21077	0.0474952	1.1976	0.572752	0.0484145	9.12205e-15	3.4727e-14	FALSE
YHR056C	RSC30	chrVIII_218189_T_C_21097	0.0407852	0.503048	0.884859	-0.0468094	3.8564e-07	9.90161e-07	FALSE
YHR057C	CPR2	chrVIII_218189_T_C_21097	-0.0696971	5.54847	0.000653595	-0.0625519	9.27161e-20	4.181e-19	FALSE
YHR060W	VMA22	chrVIII_221114_C_T_21119	-0.0217505	0.889959	0.711592	-0.0554022	1.02012e-15	4.01172e-15	FALSE
YHR061C	GIC1	chrVIII_221114_C_T_21119	0.00760669	1.57024	0.405867	0.0368415	0.000191771	0.000393592	FALSE
YHR063C	PAN5	chrVIII_225830_T_A_21138	-0.036967	1.79844	0.315207	-0.0219349	0.000758689	0.00145528	FALSE
YHR064C	SSZ1	chrVIII_225830_T_A_21138	0.0938455	11.9721	0	0.0818317	1.41452e-42	1.14241e-41	FALSE
YHR065C	RRP3	chrVIII_230614_A_G_21153	-0.0812448	2.91398	0.0760294	-0.00275074	0.636078	0.700654	FALSE
YHR066W	SSF1	chrVIII_230614_A_G_21153	-0.0433098	1.00994	0.654213	0.000699467	0.944182	0.956053	FALSE
YHR067W	HTD2	chrVIII_230614_A_G_21153	0.0175188	0.958754	0.676252	-0.00940235	0.255666	0.325372	FALSE
YHR068W	DYS1	chrVIII_234310_C_T_21155	-0.0916396	13.6272	0	-0.113831	4.15508e-56	4.4326e-55	FALSE
YHR069C	RRP4	chrVIII_234310_C_T_21155	0.00176361	0.964471	0.673443	-0.00289517	0.639086	0.70329	FALSE
YHR069C-A	YHR069C-A	chrVIII_234310_C_T_21155	-0.0311239	0.71911	0.79047	0.0391339	0.235845	0.303457	FALSE
YHR070W	TRM5	chrVIII_234310_C_T_21155	-0.0969384	0.604378	0.842357	0.00121121	0.895098	0.917728	FALSE
YHR071W	PCL5	chrVIII_237787_C_G_21157	0.0714324	3.95196	0.0114286	0.0372314	0.019879	0.0316272	FALSE
YHR072W	ERG7	chrVIII_237787_C_G_21157	0.0447676	1.99934	0.245733	0.0750072	5.03221e-19	2.2134e-18	FALSE
YHR072W-A	NOP10	chrVIII_237787_C_G_21157	0.0107374	1.15193	0.587917	0.00883259	0.23984	0.307835	FALSE
YHR073W	OSH3	chrVIII_248246_G_A_21166	0.0323406	0.948425	0.680664	0.0988902	6.3866e-64	7.9216e-63	FALSE
YHR074W	QNS1	chrVIII_248246_G_A_21166	0.00471719	0.105415	0.995301	0.00222988	0.718431	0.77044	FALSE
YHR075C	PPE1	chrVIII_248246_G_A_21166	0.0301244	2.32707	0.168724	-0.0163233	0.186065	0.246563	FALSE
YHR076W	PTC7	chrVIII_248246_G_A_21166	-0.0611319	2.23823	0.18715	-0.01165	0.0491648	0.0733623	FALSE
YHR077C	NMD2	chrVIII_257550_A_G_21179	-0.0309565	0.872475	0.71919	0.0278744	7.19176e-06	1.68121e-05	FALSE
YHR078W	YHR078W	chrVIII_257550_A_G_21179	0.0383624	0.877869	0.716295	0.00404581	0.598917	0.665116	FALSE
YHR079C	IRE1	chrVIII_257550_A_G_21179	-0.0139073	0.726255	0.786757	0.00656198	0.297685	0.371004	FALSE
YHR080C	LAM4	chrVIII_269682_C_T_21188	0.0148575	1.07226	0.625191	0.0141695	0.182482	0.242377	FALSE
YHR081W	LRP1	chrVIII_269682_C_T_21188	0.0496455	1.49504	0.436562	-0.00259499	0.770321	0.814779	FALSE
YHR082C	KSP1	chrVIII_269682_C_T_21188	0.0494455	0.627905	0.831138	0.00746737	0.408594	0.486243	FALSE
YHR083W	SAM35	chrVIII_269682_C_T_21188	0.00187138	0.00607182	1.00019	-0.0123814	0.00806244	0.0136232	FALSE
YHR084W	STE12	chrVIII_278110_T_C_21195	0.067077	1.04632	0.637769	-0.0325249	0.00757806	0.0128542	FALSE
YHR085W	IPI1	chrVIII_278110_T_C_21195	-0.0537141	1.38558	0.488306	0.00191769	0.847956	0.878849	FALSE
YHR086W	NAM8	chrVIII_278110_T_C_21195	-0.0534801	2.13144	0.212401	-0.0186505	0.0221185	0.0349761	FALSE
YHR088W	RPF1	chrVIII_283616_T_C_21198	-0.0279636	0.66529	0.813661	0.00465541	0.660616	0.722256	FALSE
YHR089C	GAR1	chrVIII_283616_T_C_21198	-0.0129274	0.564387	0.858218	-0.0122934	0.131175	0.180564	FALSE
YHR090C	YNG2	chrVIII_283616_T_C_21198	-0.0675586	0.52469	0.876482	-0.00968819	0.128473	0.177142	FALSE
YHR091C	MSR1	chrVIII_283616_T_C_21198	0.0127725	0.680975	0.807516	-0.00584355	0.538161	0.610454	FALSE
YHR092C	HXT4	chrVIII_283616_T_C_21198	0.117025	1.27176	0.53563	0.01588	0.566897	0.635841	FALSE
YHR094C	HXT1	chrVIII_283616_T_C_21198	0.0825678	1.48005	0.443378	0.186368	9.94169e-06	2.29683e-05	FALSE
YHR096C	HXT5	chrVIII_283616_T_C_21198	0.0830108	1.22843	0.556424	-0.235271	1.909e-07	4.99572e-07	FALSE
YHR097C	YHR097C	chrVIII_283616_T_C_21198	0.0720358	1.04075	0.639875	0.0215607	0.283702	0.356163	FALSE
YHR098C	SFB3	chrVIII_283616_T_C_21198	0.0151934	0.633751	0.828516	-0.00261011	0.698127	0.754611	FALSE
YHR099W	TRA1	chrVIII_330629_T_C_21251	0.00111848	0.853954	0.730235	0.00898187	0.424396	0.502214	FALSE
YHR100C	GEP4	chrVIII_330629_T_C_21251	-0.0864956	2.14519	0.208428	0.0053215	0.431401	0.509343	FALSE
YHR101C	BIG1	chrVIII_330629_T_C_21251	-0.27336	3.35507	0.0370665	-0.00458361	0.595595	0.662571	FALSE
YHR102W	KIC1	chrVIII_330629_T_C_21251	-0.0371042	1.35268	0.501645	0.00921283	0.2172	0.282518	FALSE
YHR103W	SBE22	chrVIII_330629_T_C_21251	0.00317159	0.160002	0.990639	-0.00375218	0.557161	0.627876	FALSE
YHR104W	GRE3	chrVIII_330629_T_C_21251	-0.0206824	0.828814	0.744607	-0.105273	8.88845e-10	2.66653e-09	FALSE
YHR106W	TRR2	chrVIII_330629_T_C_21251	-0.0394805	0.535308	0.872229	0.00237279	0.816716	0.852342	FALSE
YHR107C	CDC12	chrVIII_330629_T_C_21251	-0.0353167	0.84512	0.734766	-0.0125183	0.0142716	0.023263	FALSE
YHR108W	GGA2	chrVIII_330629_T_C_21251	-0.13606	8.31516	0	-0.0971816	4.60307e-61	5.44935e-60	FALSE
YHR109W	CTM1	chrVIII_330629_T_C_21251	0.0760341	2.0925	0.222717	0.071936	9.04712e-13	3.14095e-12	FALSE
YHR110W	ERP5	chrVIII_330629_T_C_21251	-0.0140123	0.615972	0.836254	-0.017368	0.00101474	0.00192128	FALSE
YHR111W	UBA4	chrVIII_330629_T_C_21251	-0.143126	4.31923	0.00694259	-0.0217734	6.41682e-05	0.000137627	FALSE
YHR112C	YHR112C	chrVIII_337824_A_G_21261	0.0151902	1.49116	0.437995	0.00684346	0.367891	0.445018	FALSE
YHR113W	APE4	chrVIII_337824_A_G_21261	0.558769	75.8324	0	0.150732	8.97937e-53	8.94495e-52	TRUE
YHR114W	BZZ1	chrVIII_339361_C_T_21263	-0.284318	4.19755	0.00776197	-0.0363568	1.8565e-07	4.86501e-07	FALSE
YHR115C	DMA1	chrVIII_339361_C_T_21263	-1.80829	137.222	0	-0.12347	3.50874e-89	6.19228e-88	FALSE
YHR116W	COX23	chrVIII_343053_G_A_21269	-0.037346	1.95185	0.261243	0.0347575	0.00649305	0.0111193	FALSE
YHR117W	TOM71	chrVIII_343053_G_A_21269	0.0359283	0.639004	0.8258	0.0318142	3.08881e-10	9.4956e-10	FALSE
YHR118C	ORC6	chrVIII_343053_G_A_21269	-0.055511	1.14173	0.592172	-0.00450834	0.472177	0.547205	FALSE
YHR119W	SET1	chrVIII_343053_G_A_21269	-0.01541	0.858306	0.728238	0.024021	8.30075e-05	0.000176511	FALSE
YHR120W	MSH1	chrVIII_343053_G_A_21269	-0.14018	2.11074	0.217574	0.00197049	0.769102	0.813941	FALSE
YHR121W	LSM12	chrVIII_343053_G_A_21269	0.00383529	0.111158	0.994827	-0.000537815	0.944494	0.9562	FALSE
YHR122W	CIA2	chrVIII_343053_G_A_21269	0.0390717	0.535266	0.872246	0.0127327	0.0551817	0.0815532	FALSE
YHR123W	EPT1	chrVIII_367199_T_C_21290	0.0590334	2.04774	0.233688	-0.00219714	0.718145	0.770278	FALSE
YHR124W	NDT80	chrVIII_367199_T_C_21290	0.0109606	0.333171	0.94556	-0.0478977	3.54296e-05	7.78579e-05	FALSE
YHR127W	YHR127W	chrVIII_367199_T_C_21290	0.0506669	0.930069	0.690093	0.00278546	0.690599	0.748313	FALSE
YHR128W	FUR1	chrVIII_367199_T_C_21290	-0.0795776	5.30219	0.000653595	-0.143333	1.69567e-53	1.7314e-52	FALSE
YHR129C	ARP1	chrVIII_367199_T_C_21290	-0.00483783	0.838565	0.738614	0.00339277	0.598081	0.664819	FALSE
YHR130C	YHR130C	chrVIII_367199_T_C_21290	-0.0527079	0.933675	0.688326	0.0196852	0.384753	0.46198	FALSE
YHR131C	YHR131C	chrVIII_367199_T_C_21290	0.151217	1.10045	0.611512	-0.0015418	0.828888	0.862997	FALSE
YHR132C	ECM14	chrVIII_367199_T_C_21290	-0.010279	0.490608	0.890314	0.00143399	0.721926	0.773608	FALSE
YHR132W-A	IGO2	chrVIII_372705_C_A_21296	0.166025	9.3447	0	0.000652132	0.943372	0.955741	FALSE
YHR133C	NSG1	chrVIII_372705_C_A_21296	0.354231	11.7159	0	0.0051988	0.382117	0.459945	FALSE
YHR134W	WSS1	chrVIII_372705_C_A_21296	0.155787	3.75945	0.0188705	0.0467863	5.99794e-09	1.72516e-08	FALSE
YHR135C	YCK1	chrVIII_372705_C_A_21296	-0.00230436	1.21865	0.562738	0.0090336	0.119222	0.165625	FALSE
YHR136C	SPL2	chrVIII_374928_A_G_21297	-0.139284	3.83299	0.0157947				FALSE
YHR137W	ARO9	chrVIII_374928_A_G_21297	-0.0148927	1.25564	0.544797				FALSE
YHR138C	YHR138C	chrVIII_374928_A_G_21297	-0.00891893	1.02962	0.64512	-0.00681266	0.695781	0.752502	FALSE
YHR139C	SPS100	chrVIII_374928_A_G_21297	-0.45713	2.19008	0.198225	0.0390596	0.457735	0.53393	FALSE
YHR140W	YHR140W	chrVIII_384503_C_T_21356	-0.317605	8.14488	0	-0.289625	3.05783e-31	1.91928e-30	FALSE
YHR141C	RPL42B	chrVIII_384503_C_T_21356	-0.00258492	0.685417	0.805894	-0.0249358	0.00282116	0.0050486	FALSE
YHR142W	CHS7	chrVIII_384503_C_T_21356	-0.0103242	1.40893	0.477811	-0.0754789	5.37899e-23	2.6722e-22	FALSE
YHR150W	PEX28	chrVIII_399043_A_G_21485	-0.312431	9.11548	0	0.0259409	0.000209016	0.000427145	FALSE
YHR151C	MTC6	chrVIII_399043_A_G_21485	-0.0405903	1.90649	0.277411	-0.037064	7.33612e-08	1.98429e-07	FALSE
YHR152W	SPO12	chrVIII_399043_A_G_21485	-0.0531877	1.50211	0.434198	-0.055766	1.28588e-09	3.83149e-09	FALSE
YHR153C	SPO16	chrVIII_399043_A_G_21485	0.0847052	1.00075	0.659201	-0.0214663	0.138018	0.189299	FALSE
YHR154W	RTT107	chrVIII_406060_G_A_21528	-0.0949099	1.80196	0.314139	-0.0406669	1.16673e-05	2.67711e-05	FALSE
YHR155W	LAM1	chrVIII_406060_G_A_21528	-0.0367018	0.690199	0.80413	0.0943006	6.83206e-32	4.34547e-31	FALSE
YHR156C	LIN1	chrVIII_406060_G_A_21528	0.00109174	2.72365	0.0969887	-0.0419403	1.243e-05	2.84161e-05	FALSE
YHR157W	REC104	chrVIII_419744_T_G_21571	0.164012	1.46442	0.451645	0.100628	5.96976e-07	1.50973e-06	FALSE
YHR158C	KEL1	chrVIII_419744_T_G_21571	-0.0407942	0.584189	0.850075	-0.069183	2.34022e-23	1.17794e-22	FALSE
YHR159W	TDA11	chrVIII_419744_T_G_21571	0.0568971	1.74962	0.334408	0.00623413	0.520053	0.593664	FALSE
YHR162W	MPC2	chrVIII_423677_T_A_21582	-0.0525004	13.142	0	0.0108936	0.11241	0.157077	FALSE
YHR163W	SOL3	chrVIII_423677_T_A_21582	0.177909	46.0815	0	0.29111	1.65604e-206	8.60839e-205	FALSE
YHR164C	DNA2	chrVIII_423677_T_A_21582	-0.260505	7.5216	0.000403226	-0.0234467	0.000591949	0.00115128	FALSE
YHR165C	PRP8	chrVIII_423677_T_A_21582	-0.134716	3.52394	0.0259468	-0.0386383	6.00297e-06	1.41255e-05	FALSE
YHR166C	CDC23	chrVIII_423677_T_A_21582	0.00934378	1.18386	0.57652	0.00152793	0.809005	0.846235	FALSE
YHR167W	THP2	chrVIII_453534_C_T_21697	-0.0517221	0.941025	0.684671	-0.0484854	4.68652e-09	1.35821e-08	FALSE
YHR168W	MTG2	chrVIII_453534_C_T_21697	-0.144198	2.89245	0.0780843	-0.169486	8.48843e-74	1.22878e-72	FALSE
YHR169W	DBP8	chrVIII_453534_C_T_21697	-0.00116419	0.695422	0.801772	-0.0261442	0.0107025	0.0177588	FALSE
YHR170W	NMD3	chrVIII_453534_C_T_21697	0.0417429	1.70334	0.350958	-0.00219987	0.806069	0.844158	FALSE
YHR171W	ATG7	chrVIII_453534_C_T_21697	-0.0045822	0.647843	0.822208	-0.0529175	0.000387983	0.000771917	FALSE
YHR172W	SPC97	chrVIII_453534_C_T_21697	0.0459573	0.226739	0.977885	-0.0126339	0.15388	0.208899	FALSE
YHR174W	ENO2	chrVIII_453534_C_T_21697	-0.00523963	0.68472	0.806148	-0.0158692	0.179174	0.238704	FALSE
YHR175W	CTR2	chrVIII_453534_C_T_21697	0.00577585	1.18684	0.576101	0.0323977	1.64589e-05	3.70957e-05	FALSE
YHR175W-A	YHR175W-A	chrVIII_453534_C_T_21697	-0.0124429	0.889905	0.711611	0.0785474	0.102631	0.144259	FALSE
YHR176W	FMO1	chrVIII_453534_C_T_21697	-0.00353795	2.42096	0.149536	0.00726165	0.618361	0.684061	FALSE
YHR181W	SVP26	chrVIII_469661_A_G_21764	-0.0336025	1.16938	0.580629	0.0137256	0.0197498	0.0314391	FALSE
YHR182W	YHR182W	chrVIII_469661_A_G_21764	-0.114849	0.603005	0.842929	-0.0931824	1.02872e-24	5.39653e-24	FALSE
YHR183W	GND1	chrVIII_469661_A_G_21764	-0.0344537	2.86146	0.0807399	-0.0275111	0.00399921	0.00702534	FALSE
YHR184W	SSP1	chrVIII_469661_A_G_21764	-0.281502	1.46297	0.452236	-0.130773	2.44374e-10	7.55723e-10	FALSE
YHR186C	KOG1	chrVIII_485700_G_A_21786	0.0648911	0.996562	0.660516	0.00714257	0.347508	0.424492	FALSE
YHR187W	IKI1	chrVIII_485700_G_A_21786	-0.0848422	1.64113	0.377335	0.00322784	0.566492	0.635582	FALSE
YHR188C	GPI16	chrVIII_485700_G_A_21786	0.0190553	1.02205	0.647616	-0.00514779	0.356556	0.433186	FALSE
YHR190W	ERG9	chrVIII_485700_G_A_21786	0.0667381	4.47415	0.00497925	0.136209	1.28653e-27	7.28354e-27	FALSE
YHR191C	CTF8	chrVIII_485700_G_A_21786	0.00339198	0.255	0.969058	-0.0243943	0.00634743	0.0108829	FALSE
YHR192W	LNP1	chrVIII_485700_G_A_21786	0.0228717	0.866575	0.722896	-0.0002194	0.968824	0.975821	FALSE
YHR193C	EGD2	chrVIII_485700_G_A_21786	-0.00275851	1.19383	0.574195	-0.00616759	0.067473	0.0982957	FALSE
YHR194W	MDM31	chrVIII_485700_G_A_21786	-0.170536	2.97363	0.0724348	-0.197965	4.57681e-73	6.52623e-72	FALSE
YHR195W	NVJ1	chrVIII_496069_G_A_21794	0.0111043	1.79053	0.317385	-0.00895149	0.384975	0.46198	FALSE
YHR196W	UTP9	chrVIII_496069_G_A_21794	0.00246581	0.824393	0.744728	0.00366384	0.715226	0.768011	FALSE
YHR197W	RIX1	chrVIII_496069_G_A_21794	-0.0639149	1.27542	0.533899	0.00990272	0.422147	0.499759	FALSE
YHR198C	AIM18	chrVIII_496069_G_A_21794	-0.0652773	1.18587	0.576237	0.01085	0.3598	0.436616	FALSE
YHR199C	AIM46	chrVIII_496069_G_A_21794	-0.0278715	0.52397	0.87676	-0.00125205	0.833388	0.867202	FALSE
YHR200W	RPN10	chrVIII_501912_A_G_21799	0.00713983	0.85098	0.7316	0.00438997	0.382453	0.460102	FALSE
YHR201C	PPX1	chrVIII_501912_A_G_21799	0.098782	3.40774	0.0327419	0.0500417	2.02537e-12	6.9182e-12	FALSE
YHR202W	YHR202W	chrVIII_501912_A_G_21799	0.0442761	1.22601	0.558041	0.0258089	0.0366164	0.0558327	FALSE
YHR203C	RPS4B	chrVIII_501912_A_G_21799	-0.0145835	1.89106	0.282916	-0.0120353	0.0710237	0.10284	FALSE
YHR204W	MNL1	chrVIII_513025_T_C_21814	-0.102639	1.51064	0.432068	-0.0170326	0.00511266	0.00888577	FALSE
YHR205W	SCH9	chrVIII_513025_T_C_21814	-0.0443311	1.43689	0.464274	-0.0643538	2.71722e-10	8.38481e-10	FALSE
YHR206W	SKN7	chrVIII_513025_T_C_21814	0.0104088	1.45188	0.457292	-0.0425556	3.59133e-08	9.88697e-08	FALSE
YHR209W	CRG1	chrVIII_521047_G_A_21838	0.0418323	1.92715	0.271755	0.0442626	0.0105164	0.0174703	FALSE
YHR210C	YHR210C	chrVIII_521047_G_A_21838	0.0123791	1.45116	0.457629	0.0760682	9.40694e-07	2.34886e-06	FALSE
YHR211W	FLO5	chrVIII_521047_G_A_21838	-1.18002	5.917	0.000403226	-0.692162	1.0018e-242	6.98571e-241	FALSE
YHR215W	PHO12	chrVIII_556005_T_A_21885	-0.185269	3.04383	0.0627118	-0.0281729	0.318286	0.393759	FALSE
YHR216W	IMD2	chrVIII_556005_T_A_21885	-0.588284	42.5415	0	-0.225763	4.55389e-11	1.46287e-10	TRUE
YIL001W	YIL001W	chrIX_360067_A_G_23741	0.0379858	0.980232	0.665047	0.00871906	0.338585	0.415456	FALSE
YIL002C	INP51	chrIX_348652_G_C_23735	-0.00359682	0.51431	0.880263	-0.00817621	0.208127	0.27289	FALSE
YIL002W-A	YIL002W-A	chrIX_348652_G_C_23735	-0.0048869	0.97161	0.669714	0.00212915	0.770115	0.814712	FALSE
YIL003W	CFD1	chrIX_348652_G_C_23735	-0.4892	36.2861	0	0.0233419	0.000385883	0.000768005	FALSE
YIL004C	BET1	chrIX_348652_G_C_23735	-0.0318847	0.311919	0.952163	-0.0177552	0.00625174	0.0107362	FALSE
YIL005W	EPS1	chrIX_348652_G_C_23735	0.0330902	0.626744	0.831517	-0.00456742	0.444258	0.521508	FALSE
YIL006W	YIA6	chrIX_348652_G_C_23735	-0.0313317	0.524256	0.876649	0.00238935	0.823498	0.85848	FALSE
YIL007C	NAS2	chrIX_348652_G_C_23735	0.0139099	1.068	0.627444	0.022407	0.0297118	0.0459416	FALSE
YIL008W	URM1	chrIX_348652_G_C_23735	0.000354464	0.772543	0.768008	0.0292835	0.00208772	0.00381027	FALSE
YIL010W	DOT5	chrIX_335035_C_A_23664	0.0385597	1.84319	0.300775	-0.0636493	5.13424e-17	2.09997e-16	FALSE
YIL011W	TIR3	chrIX_335035_C_A_23664	0.622933	52.3372	0	0.206942	4.23784e-22	2.06054e-21	TRUE
YIL013C	PDR11	chrIX_335035_C_A_23664	0.119629	0.510134	0.881708	0.0419998	0.000160033	0.000330923	FALSE
YIL014C-A	YIL014C-A	chrIX_323976_A_G_23610	-1.19118	113.043	0	-3.46806	0	0	FALSE
YIL014W	MNT3	chrIX_323976_A_G_23610	-0.247798	6.88306	0.000403226	-0.192986	4.5842e-145	1.47261e-143	FALSE
YIL015W	BAR1	chrIX_323976_A_G_23610	0.135693	4.45314	0.00497925	0.129053	0.131353	0.180765	FALSE
YIL016W	SNL1	chrIX_320712_T_C_23604	0.00974451	0.106563	0.995183	0.00304996	0.685142	0.743527	FALSE
YIL017C	VID28	chrIX_320712_T_C_23604	0.0591228	0.401412	0.92601	0.0272022	0.0411822	0.0621811	FALSE
YIL018W	RPL2B	chrIX_317752_T_C_23601	0.000503322	0.210266	0.981392	-0.00152153	0.839384	0.872496	FALSE
YIL019W	FAF1	chrIX_317752_T_C_23601	-0.0647991	1.55957	0.410954	-0.0212663	0.0799121	0.114636	FALSE
YIL020C	HIS6	chrIX_311839_C_T_23596	-0.0560537	1.16673	0.581794	-0.028262	0.000119734	0.000250691	FALSE
YIL020C-A	YIL020C-A	chrIX_311839_C_T_23596	-0.0577994	0.748821	0.776784				FALSE
YIL021W	RPB3	chrIX_311839_C_T_23596	-0.0104815	0.277578	0.96402	0.00495039	0.314696	0.389657	FALSE
YIL022W	TIM44	chrIX_311839_C_T_23596	-0.0121726	1.09129	0.615676	-0.0318906	3.11294e-06	7.47577e-06	FALSE
YIL023C	YKE4	chrIX_308815_C_A_23570	0.00206829	0.706247	0.797072	-0.00355179	0.565232	0.634471	FALSE
YIL024C	YIL024C	chrIX_308815_C_A_23570	-0.0849313	1.68663	0.358372	-0.0461814	0.000220165	0.000448488	FALSE
YIL026C	IRR1	chrIX_303589_T_C_23565	-0.0329221	1.39398	0.484179	-0.0158431	0.0361128	0.0551235	FALSE
YIL027C	EMC5	chrIX_303589_T_C_23565	-0.0237346	1.68769	0.357825	-0.00545086	0.4643	0.540157	FALSE
YIL030C	SSM4	chrIX_298782_G_C_23561	-0.0875152	1.65407	0.37238	-0.0114149	0.0984575	0.13911	FALSE
YIL030W-A	YIL030W-A	chrIX_298782_G_C_23561	0.0920719	1.08104	0.621076	-0.0074385	0.661357	0.722929	FALSE
YIL031W	ULP2	chrIX_292353_A_C_23557	-0.0740418	0.51477	0.880104	0.00970008	0.207721	0.27242	FALSE
YIL033C	BCY1	chrIX_292353_A_C_23557	0.144644	10.7113	0	0.167662	8.1187e-50	7.63532e-49	FALSE
YIL034C	CAP2	chrIX_292353_A_C_23557	-0.0188667	1.27087	0.536048	0.00502729	0.47184	0.546925	FALSE
YIL035C	CKA1	chrIX_284253_C_T_23526	-0.0311828	1.28399	0.53065	0.00740077	0.171929	0.230393	FALSE
YIL036W	CST6	chrIX_284253_C_T_23526	-0.0181667	1.17324	0.579287	0.0384444	0.000266743	0.000539717	FALSE
YIL037C	PRM2	chrIX_284253_C_T_23526	-0.916973	9.00275	0	-0.872093	1.18228e-130	3.34666e-129	FALSE
YIL046W	MET30	chrIX_268690_A_G_23428	0.157788	12.2138	0	0.0809563	2.44895e-29	1.46018e-28	FALSE
YIL047C	SYG1	chrIX_268690_A_G_23428	0.173449	1.21945	0.562335	-0.0935306	1.01131e-36	7.29218e-36	FALSE
YIL047C-A	YIL047C-A	chrIX_268690_A_G_23428	0.0396484	0.590009	0.848253	-0.0932506	4.01076e-23	1.99769e-22	FALSE
YIL048W	NEO1	chrIX_260167_G_A_23376	0.11018	1.72621	0.343445	0.0779251	8.42888e-28	4.80522e-27	FALSE
YIL049W	DFG10	chrIX_260167_G_A_23376	-0.211135	5.61212	0.000403226	-0.165541	1.45864e-44	1.22654e-43	FALSE
YIL050W	PCL7	chrIX_260167_G_A_23376	0.102802	5.3003	0.000653595	-0.0272147	0.0040545	0.0071181	FALSE
YIL051C	MMF1	chrIX_256094_T_A_23329	0.0372765	5.57151	0.000403226	0.0145881	0.0108517	0.0179856	FALSE
YIL052C	RPL34B	chrIX_256094_T_A_23329	0.0325868	10.4997	0	0.0460881	4.20538e-09	1.22125e-08	FALSE
YIL053W	GPP1	chrIX_256094_T_A_23329	0.00835205	1.65537	0.371764	0.0210077	0.0399919	0.0605437	FALSE
YIL066C	RNR3	chrIX_239129_T_A_23181	0.222667	2.09791	0.221299	0.095789	0.000235295	0.000478456	FALSE
YIL067C	YIL067C	chrIX_239129_T_A_23181	0.0432975	1.24157	0.550621	-0.0132934	0.0492122	0.0734139	FALSE
YIL068C	SEC6	chrIX_239129_T_A_23181	-0.0654428	2.54245	0.125594	-0.00912595	0.126608	0.174781	FALSE
YIL069C	RPS24B	chrIX_227301_A_T_23175	-0.0072695	1.13523	0.595932	-0.0289244	0.000143729	0.00029831	FALSE
YIL070C	MAM33	chrIX_227301_A_T_23175	0.00624789	1.39252	0.484897	-0.0121821	0.348032	0.425042	FALSE
YIL071C	PCI8	chrIX_227301_A_T_23175	0.162117	1.32373	0.513969	-0.0151283	0.157639	0.213446	FALSE
YIL074C	SER33	chrIX_227301_A_T_23175	-0.00398773	0.490275	0.890459	-0.0809991	9.02915e-21	4.20772e-20	FALSE
YIL075C	RPN2	chrIX_214397_G_A_23152	0.0181166	1.60963	0.388052	-0.00394076	0.461425	0.537359	FALSE
YIL076W	SEC28	chrIX_214397_G_A_23152	-0.00610223	0.93179	0.689249	-0.0194236	0.00358359	0.0063322	FALSE
YIL077C	YIL077C	chrIX_214397_G_A_23152	0.0148245	0.956617	0.677121	-0.0603431	3.32417e-06	7.94964e-06	FALSE
YIL078W	THS1	chrIX_214397_G_A_23152	-0.0174414	1.37279	0.493938	-0.0262262	3.71187e-07	9.54337e-07	FALSE
YIL079C	AIR1	chrIX_214397_G_A_23152	-0.0194325	0.432007	0.914563	-0.0186185	0.0462032	0.0692867	FALSE
YIL082W	YIL082W	chrIX_200213_C_T_23086	-1.58512	17.2519	0				FALSE
YIL083C	CAB2	chrIX_200213_C_T_23086	0.0784117	2.5108	0.133085	-0.00751155	0.268482	0.339424	FALSE
YIL084C	SDS3	chrIX_200213_C_T_23086	-0.0965075	2.18316	0.20055	-0.0172502	0.0762044	0.109619	FALSE
YIL085C	KTR7	chrIX_200213_C_T_23086	-0.000167918	2.15955	0.206665	0.0519269	2.64856e-36	1.88599e-35	FALSE
YIL091C	UTP25	chrIX_191635_C_T_23009	0.0393923	1.20557	0.569186	0.0344349	0.000637112	0.00123325	FALSE
YIL092W	YIL092W	chrIX_191635_C_T_23009	-0.0615886	0.827102	0.744654	-0.0121305	0.120647	0.167238	FALSE
YIL093C	RSM25	chrIX_191635_C_T_23009	0.0585651	0.534596	0.872524	0.0280313	0.0123981	0.0203773	FALSE
YIL094C	LYS12	chrIX_191635_C_T_23009	-0.0358623	3.38862	0.0341976	-0.0448697	1.53612e-09	4.56525e-09	FALSE
YIL095W	PRK1	chrIX_179764_A_G_22948	0.0329424	1.03501	0.642571	0.0171212	0.0181597	0.0291024	FALSE
YIL096C	BMT5	chrIX_179764_A_G_22948	0.0659668	1.67029	0.365286	0.0667629	5.4444e-08	1.48526e-07	FALSE
YIL097W	FYV10	chrIX_179764_A_G_22948	0.049281	1.59048	0.397185	0.00782727	0.59242	0.659552	FALSE
YIL098C	FMC1	chrIX_179764_A_G_22948	0.200435	6.68286	0.000403226	0.0604494	1.90167e-07	4.97884e-07	FALSE
YIL102C-A	YIL102C-A	chrIX_173151_T_C_22916	0.276799	4.6339	0.0039886	0.114568	2.5719e-13	9.13992e-13	FALSE
YIL103W	DPH1	chrIX_173151_T_C_22916	-0.0859167	1.98059	0.250553	-0.0995514	2.23965e-32	1.43408e-31	FALSE
YIL104C	SHQ1	chrIX_173151_T_C_22916	-0.128089	1.98079	0.250514	-0.0922599	2.13506e-33	1.40811e-32	FALSE
YIL105C	SLM1	chrIX_173151_T_C_22916	0.0150246	0.420254	0.917417	0.00315083	0.726569	0.777418	FALSE
YIL106W	MOB1	chrIX_163793_A_G_22905	0.103484	2.57102	0.121302	0.0500266	1.16569e-13	4.22398e-13	FALSE
YIL107C	PFK26	chrIX_163793_A_G_22905	-0.0401977	0.901636	0.703803	-0.0578902	0.000129938	0.000270964	FALSE
YIL110W	HPM1	chrIX_155654_T_C_22896	0.0397428	2.30402	0.172817	0.0390679	6.04137e-07	1.52582e-06	FALSE
YIL111W	COX5B	chrIX_155654_T_C_22896	-0.59763	204.915	0	-0.521206	1.83417e-145	5.92529e-144	FALSE
YIL112W	HOS4	chrIX_151788_T_G_22883	0.0602488	1.58624	0.398987	0.0216505	0.000222606	0.000452976	FALSE
YIL113W	SDP1	chrIX_151788_T_G_22883	0.0712205	1.52122	0.429578	-0.0574271	0.017051	0.0274178	FALSE
YIL114C	POR2	chrIX_151788_T_G_22883	0.0380064	2.41703	0.150128	-0.0430446	2.46959e-06	5.99369e-06	FALSE
YIL115C	NUP159	chrIX_143302_C_T_22857	0.0467387	1.38659	0.487808	0.0362092	1.12301e-07	2.98669e-07	FALSE
YIL116W	HIS5	chrIX_143302_C_T_22857	0.812725	355.911	0	0.364069	1.85933e-247	1.32896e-245	FALSE
YIL117C	PRM5	chrIX_141911_A_G_22853	0.026507	1.14399	0.591218	-0.00671997	0.812703	0.849394	FALSE
YIL118W	RHO3	chrIX_141911_A_G_22853	-0.0406578	1.63943	0.377874	0.105461	1.64678e-45	1.40332e-44	FALSE
YIL119C	RPI1	chrIX_136075_A_G_22791	-0.946418	92.372	0	0.0883862	1.02763e-05	2.37031e-05	FALSE
YIL120W	QDR1	chrIX_136075_A_G_22791	0.156871	4.46836	0.00497925	-0.0054109	0.623353	0.689026	FALSE
YIL124W	AYR1	chrIX_127868_C_T_22718	-0.0969685	8.91935	0	-0.125317	4.76532e-35	3.29083e-34	FALSE
YIL125W	KGD1	chrIX_127868_C_T_22718	0.0775283	1.7758	0.323555	0.0867941	1.69356e-09	5.01491e-09	FALSE
YIL126W	STH1	chrIX_117012_T_A_22685	0.00666278	0.782827	0.7629	0.162118	9.93231e-79	1.51045e-77	FALSE
YIL127C	RRT14	chrIX_117012_T_A_22685	0.258449	21.7157	0	-0.0146928	0.170703	0.229019	FALSE
YIL128W	MET18	chrIX_115136_C_T_22683	0.0680785	2.79522	0.088184	-0.116803	4.58032e-50	4.32897e-49	FALSE
YIL129C	TAO3	chrIX_115136_C_T_22683	-0.0255896	1.96582	0.256115	-0.00848947	0.354296	0.43131	FALSE
YIL130W	ASG1	chrIX_98932_A_G_22602	-0.158928	2.80206	0.0870173	-0.147249	1.55007e-72	2.18847e-71	FALSE
YIL131C	FKH1	chrIX_98932_A_G_22602	-0.130655	3.15528	0.0508795	-0.0744087	3.52792e-19	1.55894e-18	FALSE
YIL132C	CSM2	chrIX_98932_A_G_22602	-0.215842	1.28729	0.529754	0.0394117	0.00050369	0.000989045	FALSE
YIL133C	RPL16A	chrIX_98932_A_G_22602	0.0506542	18.1371	0	-0.0382897	2.74138e-08	7.60562e-08	FALSE
YIL137C	TMA108	chrIX_90515_C_T_22541	0.0756966	0.986656	0.663204	-0.0529308	8.09283e-16	3.20019e-15	FALSE
YIL138C	TPM2	chrIX_90515_C_T_22541	0.00773318	1.19164	0.575031	-0.00121893	0.887237	0.911794	FALSE
YIL139C	REV7	chrIX_90515_C_T_22541	-0.0169145	0.266826	0.966597	0.00673132	0.479323	0.553759	FALSE
YIL143C	SSL2	chrIX_81401_T_C_22492	0.0615061	2.00854	0.244368	-0.0260735	1.1689e-06	2.8909e-06	FALSE
YIL144W	NDC80	chrIX_81401_T_C_22492	-0.0634896	1.10545	0.609418	-0.0709846	2.84689e-19	1.26288e-18	FALSE
YIL148W	RPL40A	chrIX_69624_C_A_22422	-0.0161278	3.05751	0.0613312	-0.0499541	1.99496e-13	7.1384e-13	FALSE
YIL149C	MLP2	chrIX_69624_C_A_22422	-0.0762313	2.86499	0.0805798	0.035077	5.71687e-07	1.45065e-06	FALSE
YIL150C	MCM10	chrIX_57153_C_T_22321	-0.0249075	0.684389	0.806269	-0.00319868	0.729552	0.779443	FALSE
YIL151C	ESL1	chrIX_57153_C_T_22321	0.0585903	0.569485	0.855374	-0.0672417	1.87619e-26	1.03653e-25	FALSE
YIL152W	YIL152W	chrIX_57153_C_T_22321	0.0165879	0.154082	0.991456	-0.101325	1.72793e-33	1.14356e-32	FALSE
YIL160C	POT1	chrIX_40928_G_A_22217	0.719135	6.16951	0.000403226	0.335621	5.1875e-16	2.06417e-15	FALSE
YIL161W	YIL161W	chrIX_40928_G_A_22217	0.278696	11.4765	0	0.0447928	1.06443e-06	2.64168e-06	FALSE
YIL166C	YIL166C	chrIX_33562_G_T_22142	1.08138	17.0238	0	0.607536	1.20743e-251	9.0843e-250	FALSE
YIL169C	CSS1	chrIX_33562_G_T_22142	1.06657	6.98501	0.000403226				FALSE
YIR001C	SGN1	chrIX_360067_A_G_23741	0.102957	1.58957	0.397607	0.00618718	0.458209	0.534157	FALSE
YIR002C	MPH1	chrIX_360067_A_G_23741	-0.0692919	1.96328	0.256903	-0.0271562	3.68616e-05	8.08186e-05	FALSE
YIR003W	AIM21	chrIX_362714_G_A_23744	0.229404	8.32923	0	0.00544701	0.494835	0.569194	FALSE
YIR004W	DJP1	chrIX_362714_G_A_23744	-0.0773872	2.23938	0.186873	-0.0641801	1.7024e-24	8.88168e-24	FALSE
YIR005W	IST3	chrIX_362714_G_A_23744	0.0463633	0.961821	0.674808	0.0179839	0.096758	0.137048	FALSE
YIR006C	PAN1	chrIX_371957_C_T_23763	0.0248327	0.335268	0.944912	0.000120815	0.989829	0.992084	FALSE
YIR007W	EGH1	chrIX_371957_C_T_23763	-0.215064	3.93395	0.0121187	0.0519265	2.79714e-06	6.74569e-06	FALSE
YIR008C	PRI1	chrIX_371957_C_T_23763	-0.385774	12.3391	0	0.0166102	0.00257665	0.0046448	FALSE
YIR010W	DSN1	chrIX_376391_A_G_23778	0.0549877	0.491968	0.889721	0.00798933	0.255119	0.324821	FALSE
YIR011C	STS1	chrIX_376391_A_G_23778	-0.0215438	0.657642	0.817248	0.0102818	0.103025	0.144777	FALSE
YIR014W	YIR014W	chrIX_383339_G_A_23785	0.00028974	1.13829	0.593992	-0.0373339	0.0179661	0.0288244	FALSE
YIR016W	YIR016W	chrIX_383339_G_A_23785	0.113822	2.68229	0.102881	-0.107327	5.44931e-16	2.16684e-15	FALSE
YIR022W	SEC11	chrIX_399062_C_T_24009	0.0551446	3.60364	0.0234215	0.0294625	1.02178e-07	2.72889e-07	FALSE
YIR023W	DAL81	chrIX_399062_C_T_24009	0.10394	1.90059	0.279426	-0.0031964	0.647694	0.711394	FALSE
YIR024C	INA22	chrIX_404802_A_G_24060	0.0246968	0.349508	0.941519	0.0127073	0.206443	0.270929	FALSE
YIR025W	MND2	chrIX_404802_A_G_24060	0.286777	7.02327	0.000403226	0.132817	3.57381e-43	2.91513e-42	FALSE
YIR026C	YVH1	chrIX_404802_A_G_24060	0.293517	26.1951	0	0.140797	5.02949e-49	4.63101e-48	FALSE
YIR027C	DAL1	chrIX_407232_C_A_24078	0.598507	16.4304	0	0.129504	3.94836e-09	1.14894e-08	FALSE
YIR028W	DAL4	chrIX_407232_C_A_24078	-0.0550429	1.20115	0.571289	-0.104543	3.10536e-05	6.86372e-05	FALSE
YIR029W	DAL2	chrIX_412218_A_G_24117	0.0675559	0.630957	0.82996	-0.110912	1.58253e-13	5.68756e-13	FALSE
YIR030C	DCG1	chrIX_412218_A_G_24117	0.0142673	0.132635	0.993497	-0.323662	2.41625e-68	3.14002e-67	FALSE
YIR032C	DAL3	chrIX_416694_C_G_24148	0.231257	16.6056	0	0.0624499	1.19349e-06	2.94791e-06	FALSE
YIR033W	MGA2	chrIX_416694_C_G_24148	-0.281496	17.8109	0	0.0642655	1.09938e-05	2.5307e-05	FALSE
YIR037W	HYR1	chrIX_423451_G_A_24187	-0.000283787	0.957713	0.676675	0.00766023	0.349777	0.426627	FALSE
YIR038C	GTT1	chrIX_423451_G_A_24187	0.0429497	2.76489	0.0917887	-0.0293266	0.103917	0.145959	FALSE
YIR039C	YPS6	chrIX_428473_T_G_24280	-1.49488	62.7789	0	-0.858344	1.40128e-160	5.16935e-159	FALSE
YIR041W	PAU15	chrIX_428473_T_G_24280	-0.947963	11.0588	0				FALSE
YIR042C	YIR042C	chrIX_428473_T_G_24280	-1.02014	9.84956	0	-2.07029	2.91357e-284	2.97496e-282	FALSE
YJL001W	PRE3	chrX_436111_G_A_26645	0.000419296	0.521502	0.877713	-0.0354311	3.59395e-09	1.04955e-08	FALSE
YJL002C	OST1	chrX_436111_G_A_26645	-0.0867225	7.73538	0	-0.0476738	3.27136e-19	1.44781e-18	FALSE
YJL003W	COX16	chrX_431531_T_C_26623	0.0544968	0.887643	0.71242	0.0150051	0.132013	0.181542	FALSE
YJL004C	SYS1	chrX_431531_T_C_26623	-0.0666311	1.09176	0.615459	-0.0293227	0.000160079	0.000330923	FALSE
YJL006C	CTK2	chrX_423286_C_G_26587	-0.0968281	1.89018	0.283239	-0.0843998	1.61957e-25	8.70366e-25	FALSE
YJL008C	CCT8	chrX_423286_C_G_26587	-0.089019	8.41149	0	-0.0657469	2.21344e-50	2.1024e-49	FALSE
YJL010C	NOP9	chrX_423286_C_G_26587	-0.0134557	1.32115	0.514945	-0.0347027	9.31065e-05	0.000197325	FALSE
YJL011C	RPC17	chrX_410951_T_C_26522	0.015753	1.15103	0.588271	0.0259115	0.00271178	0.00487609	FALSE
YJL012C	VTC4	chrX_410951_T_C_26522	-0.038878	0.890474	0.711252	0.0126951	0.270002	0.340961	FALSE
YJL013C	MAD3	chrX_410951_T_C_26522	0.539492	26.4038	0	0.0213375	0.00413122	0.0072461	FALSE
YJL014W	CCT3	chrX_408211_C_T_26503	-0.185559	20.7715	0	-0.133524	4.24091e-122	1.08742e-120	FALSE
YJL016W	TPH3	chrX_408211_C_T_26503	0.0108258	0.661737	0.815218	0.0282816	0.0504526	0.0751467	FALSE
YJL019W	MPS3	chrX_408211_C_T_26503	-0.187846	1.64112	0.37734	-0.128811	2.94115e-37	2.14783e-36	FALSE
YJL020C	BBC1	chrX_399363_C_T_26464	0.799408	413.773	0	-0.0847239	2.46122e-13	8.75746e-13	TRUE
YJL020W-A	YJL020W-A	chrX_399363_C_T_26464	0.940237	7.51519	0.000403226				FALSE
YJL023C	PET130	chrX_399363_C_T_26464	0.149663	2.83794	0.0837143	-0.036353	8.25555e-06	1.92204e-05	FALSE
YJL031C	BET4	chrX_386296_A_T_26407	-0.360177	27.1645	0	0.0875414	1.09707e-23	5.59094e-23	FALSE
YJL033W	HCA4	chrX_386296_A_T_26407	-0.100317	2.24836	0.186396	-0.00157471	0.891012	0.915016	FALSE
YJL034W	KAR2	chrX_380394_C_T_26379	0.024199	2.92228	0.0755692	0.00721452	0.697478	0.754051	FALSE
YJL035C	TAD2	chrX_380394_C_T_26379	1.13635	284.003	0	0.524479	8.66104e-225	5.38302e-223	FALSE
YJL036W	SNX4	chrX_380394_C_T_26379	-0.00428978	0.998938	0.65989	0.13307	5.54119e-33	3.60872e-32	FALSE
YJL037W	IRC18	chrX_380394_C_T_26379	0.577053	10.2701	0	0.423149	1.88777e-65	2.37237e-64	FALSE
YJL039C	NUP192	chrX_380394_C_T_26379	-0.116426	1.52183	0.42925	-0.0139804	0.0500689	0.0745945	FALSE
YJL041W	NSP1	chrX_361967_T_C_26251	0.0276451	0.97667	0.666939	-0.00354012	0.514937	0.588646	FALSE
YJL042W	MHP1	chrX_361967_T_C_26251	-0.0944661	2.63617	0.110303	-0.00395009	0.758765	0.805237	FALSE
YJL047C	RTT101	chrX_347852_G_A_26149	-0.0989295	1.80927	0.31176	-0.0423087	5.98566e-09	1.7225e-08	FALSE
YJL048C	UBX6	chrX_347852_G_A_26149	-0.0177478	4.51295	0.00475524	-0.199393	5.68172e-14	2.0799e-13	TRUE
YJL049W	CHM7	chrX_347852_G_A_26149	-0.0998162	1.76335	0.329659	-0.0118914	0.14749	0.201517	FALSE
YJL050W	MTR4	chrX_347852_G_A_26149	-0.0241122	2.25793	0.185048	-0.0668346	1.47158e-10	4.61574e-10	FALSE
YJL054W	TIM54	chrX_334204_A_G_26063	0.182317	7.27287	0.000403226	0.0295058	3.35242e-08	9.25599e-08	FALSE
YJL055W	YJL055W	chrX_334204_A_G_26063	-0.148887	57.9994	0	-0.115141	1.14221e-53	1.17045e-52	FALSE
YJL056C	ZAP1	chrX_330372_T_A_26039	-0.105209	4.54611	0.00475524	-0.275292	7.01656e-85	1.17656e-83	FALSE
YJL057C	IKS1	chrX_330372_T_A_26039	0.135871	3.26236	0.0439605	0.181019	2.58289e-22	1.26555e-21	FALSE
YJL060W	BNA3	chrX_324627_T_C_25994	-0.556409	218.114	0	-0.0372078	1.19998e-05	2.7468e-05	FALSE
YJL061W	NUP82	chrX_324627_T_C_25994	-0.00592943	2.08598	0.22407	-0.0148022	0.00925501	0.0154964	FALSE
YJL062W	LAS21	chrX_316590_T_C_25969	-0.0536197	0.414835	0.919763	0.00140889	0.832961	0.866922	FALSE
[truncated: 2,122 more rows]

## Sheet: S2 (Cross B)
transcript	gene name	closest marker	estimate (one-pot)	LOD (one-pot)	FDR (one-pot)	has cell-cycle interaction
YAL002W	VPS8	chrI_143822_C_A_929	-0.00995764	0.18362	0.986353	FALSE
YAL003W	EFB1	chrI_143822_C_A_929	-0.0235217	5.70418	0.00201681	FALSE
YAL005C	SSA1	chrI_139692_G_A_916	-0.127432	15.619	0	FALSE
YAL007C	ERP2	chrI_139692_G_A_916	0.00241629	0.637835	0.815197	FALSE
YAL008W	FUN14	chrI_139692_G_A_916	-0.13797	4.51371	0.00681818	FALSE
YAL009W	SPO7	chrI_139692_G_A_916	0.128144	3.22248	0.0442622	FALSE
YAL010C	MDM10	chrI_131539_C_T_867	0.0225182	1.97551	0.251393	FALSE
YAL011W	SWC3	chrI_131539_C_T_867	0.169222	5.1533	0.00301205	FALSE
YAL012W	CYS3	chrI_131539_C_T_867	0.0611436	7.28778	0.000609756	FALSE
YAL013W	DEP1	chrI_131539_C_T_867	-0.0192314	0.993145	0.658066	FALSE
YAL014C	SYN8	chrI_128052_C_T_849	-0.0790816	1.2369	0.548823	FALSE
YAL015C	NTG1	chrI_128052_C_T_849	0.110341	1.78771	0.308092	FALSE
YAL019W	FUN30	chrI_113852_G_A_770	-0.00479933	2.42645	0.143852	FALSE
YAL020C	ATS1	chrI_113852_G_A_770	0.0198835	0.778829	0.749576	FALSE
YAL021C	CCR4	chrI_110703_G_A_758	0.0717149	1.88514	0.279688	FALSE
YAL022C	FUN26	chrI_110703_G_A_758	-0.00221012	2.25813	0.176682	FALSE
YAL023C	PMT2	chrI_110703_G_A_758	-0.0138314	0.784273	0.747497	FALSE
YAL024C	LTE1	chrI_110703_G_A_758	0.0104208	0.863985	0.713613	FALSE
YAL025C	MAK16	chrI_110703_G_A_758	0.0699563	3.3692	0.0366967	FALSE
YAL026C	DRS2	chrI_87780_G_T_668	-0.134515	1.49885	0.42251	FALSE
YAL026C-A	YAL026C-A	chrI_87780_G_T_668	0.0911679	0.558312	0.850316	FALSE
YAL027W	SAW1	chrI_87780_G_T_668	-0.317545	6.16059	0.00107914	FALSE
YAL028W	FRT2	chrI_87780_G_T_668	0.180285	2.95179	0.0661138	FALSE
YAL029C	MYO4	chrI_87780_G_T_668	-0.00697725	1.51264	0.417105	FALSE
YAL030W	SNC1	chrI_87780_G_T_668	0.0146238	1.87327	0.283911	FALSE
YAL031C	GIP4	chrI_87780_G_T_668	-0.0679127	2.16334	0.200416	FALSE
YAL032C	PRP45	chrI_83029_C_T_651	-0.0586303	0.975087	0.667079	FALSE
YAL033W	POP5	chrI_83029_C_T_651	0.122504	4.3399	0.00927282	FALSE
YAL040C	CLN3	chrI_65365_G_A_569	-0.0443575	0.937547	0.681445	FALSE
YAL041W	CDC24	chrI_65365_G_A_569	0.0659531	1.57105	0.393696	FALSE
YAL042W	ERV46	chrI_65365_G_A_569	-0.0899546	4.06028	0.015062	FALSE
YAL043C	PTA1	chrI_57669_T_C_528	-0.0343607	2.20747	0.189508	FALSE
YAL044C	GCV3	chrI_57669_T_C_528	-0.00819854	0.919643	0.690318	FALSE
YAL044W-A	BOL1	chrI_57669_T_C_528	0.0641198	1.78078	0.310392	FALSE
YAL046C	BOL3	chrI_57041_C_T_525	0.251414	16.7	0	FALSE
YAL047C	SPC72	chrI_57041_C_T_525	0.344956	5.54309	0.00201681	FALSE
YAL048C	GEM1	chrI_57041_C_T_525	-0.0234739	2.52424	0.12544	FALSE
YAL049C	AIM2	chrI_57041_C_T_525	-0.387404	74.7859	0	FALSE
YAL051W	OAF1	chrI_45285_G_A_441	-0.00274694	1.39029	0.474228	FALSE
YAL053W	FLC2	chrI_45285_G_A_441	-0.103615	2.17958	0.196641	FALSE
YAL054C	ACS1	chrI_42527_T_C_424	0.0522365	3.5323	0.0291932	FALSE
YAL055W	PEX22	chrI_42527_T_C_424	-0.260735	13.6781	0	FALSE
YAL058W	CNE1	chrI_37019_A_G_372	0.165705	2.06701	0.222933	FALSE
YAL059W	ECM1	chrI_37019_A_G_372	0.265803	15.0039	0	FALSE
YAL060W	BDH1	chrI_37019_A_G_372	0.465319	124.703	0	FALSE
YAL067C	SEO1	chrI_510_A_T_1	0.00869537	1.30118	0.519013	FALSE
YAL068C	PAU8	chrI_510_A_T_1	0.305042	1.44195	0.448324	FALSE
YAR002C-A	ERP1	chrI_156554_C_A_973	-0.00874994	1.13459	0.590534	FALSE
YAR002W	NUP60	chrI_156554_C_A_973	-0.145257	5.25186	0.00301205	FALSE
YAR003W	SWD1	chrI_156554_C_A_973	-0.0281808	0.941504	0.680085	FALSE
YAR007C	RFA1	chrI_156554_C_A_973	0.003097	2.03361	0.232676	FALSE
YAR015W	ADE1	chrI_170022_T_C_1009	-0.0562498	5.20709	0.00301205	FALSE
YAR018C	KIN3	chrI_170022_T_C_1009	0.024799	0.270593	0.964842	FALSE
YAR027W	UIP3	chrI_184382_NA_DUP_1236	-0.128675	4.201	0.0119484	FALSE
YAR028W	YAR028W	chrI_184382_NA_DUP_1236	1.01351	24.53	0	FALSE
YAR029W	YAR029W	chrI_184382_NA_DUP_1236	1.08433	35.4131	0	FALSE
YAR033W	MST28	chrI_184382_NA_DUP_1236	0.492307	17.7588	0	TRUE
YAR035W	YAT1	chrI_184382_NA_DUP_1236	0.203941	2.42219	0.144623	FALSE
YAR042W	SWH1	chrI_204039_G_A_1556	0.727339	29.7788	0	FALSE
YAR050W	FLO1	chrI_204039_G_A_1556	0.245845	0.931802	0.683514	FALSE
YBL001C	ECM15	chrII_236390_G_A_2742	-0.00670498	0.58363	0.839317	FALSE
YBL002W	HTB2	chrII_236390_G_A_2742	0.000361979	0.195339	0.985066	FALSE
YBL003C	HTA2	chrII_235927_A_T_2737	-0.0144172	1.34604	0.494273	FALSE
YBL004W	UTP20	chrII_235927_A_T_2737	0.045029	1.31876	0.509122	FALSE
YBL005W	PDR3	chrII_217774_C_T_2662	-0.347999	2.35606	0.156034	FALSE
YBL006C	LDB7	chrII_217774_C_T_2662	-0.155272	9.81511	0.000609756	FALSE
YBL009W	ALK2	chrII_207568_G_C_2637	0.00955084	0.316892	0.950226	FALSE
YBL010C	YBL010C	chrII_207568_G_C_2637	-0.0645439	1.59676	0.384199	FALSE
YBL011W	SCT1	chrII_207568_G_C_2637	-0.111184	2.87399	0.0750157	FALSE
YBL014C	RRN6	chrII_195009_C_T_2560	0.126178	1.73432	0.32597	FALSE
YBL015W	ACH1	chrII_195009_C_T_2560	0.094757	1.30819	0.514385	FALSE
YBL016W	FUS3	chrII_192576_A_G_2552	-0.0214133	0.984217	0.662777	FALSE
YBL017C	PEP1	chrII_192576_A_G_2552	-0.0435015	0.53558	0.862323	FALSE
YBL018C	POP8	chrII_182323_C_G_2503	0.00579178	0.783521	0.747754	FALSE
YBL019W	APN2	chrII_182323_C_G_2503	0.0828127	1.09756	0.607476	FALSE
YBL020W	RFT1	chrII_182323_C_G_2503	0.0569069	0.489164	0.882154	FALSE
YBL021C	HAP3	chrII_182323_C_G_2503	0.0313664	0.378987	0.92829	FALSE
YBL023C	MCM2	chrII_174535_C_T_2470	0.00291001	0.359746	0.936096	FALSE
YBL024W	NCL1	chrII_174535_C_T_2470	-0.0643465	1.72501	0.330732	FALSE
YBL030C	PET9	chrII_162773_T_C_2377	-0.0420845	5.833	0.00141343	FALSE
YBL031W	SHE1	chrII_162773_T_C_2377	-0.00870049	1.17903	0.571951	FALSE
YBL032W	HEK2	chrII_160810_T_G_2374	0.0567787	3.04595	0.0570513	FALSE
YBL033C	RIB1	chrII_160810_T_G_2374	0.0109309	1.27554	0.530433	FALSE
YBL034C	STU1	chrII_160810_T_G_2374	0.0158304	0.513478	0.871138	FALSE
YBL035C	POL12	chrII_148172_C_T_2305	0.014876	1.83179	0.294181	FALSE
YBL036C	YBL036C	chrII_148172_C_T_2305	0.0319304	0.581091	0.839924	FALSE
YBL037W	APL3	chrII_148172_C_T_2305	0.128142	3.56888	0.0273359	FALSE
YBL038W	MRPL16	chrII_148172_C_T_2305	-0.00804663	1.08194	0.61433	FALSE
YBL039C	URA7	chrII_143722_G_A_2272	-0.0424313	1.54857	0.401112	FALSE
YBL039W-B	YBL039W-B	chrII_143722_G_A_2272	-0.161123	3.46	0.0321665	FALSE
YBL042C	FUI1	chrII_139115_T_C_2244	0.0587288	0.934163	0.682664	FALSE
YBL043W	ECM13	chrII_139115_T_C_2244	-0.254997	1.59374	0.385426	FALSE
YBL045C	COR1	chrII_139115_T_C_2244	-0.00407404	3.73372	0.0219109	TRUE
YBL046W	PSY4	chrII_139115_T_C_2244	0.00571944	1.36483	0.485228	FALSE
YBL047C	EDE1	chrII_126080_T_C_2180	-0.0178013	0.913904	0.692807	FALSE
YBL048W	RRT1	chrII_126080_T_C_2180	0.0328897	0.72354	0.776479	FALSE
YBL049W	MOH1	chrII_126080_T_C_2180	-0.041102	0.765683	0.755961	FALSE
YBL050W	SEC17	chrII_126080_T_C_2180	-0.0368793	1.1956	0.565394	FALSE
YBL051C	PIN4	chrII_126080_T_C_2180	-0.0605264	1.21957	0.555462	FALSE
YBL052C	SAS3	chrII_115241_C_T_2108	-0.0595836	1.78274	0.309742	FALSE
YBL054W	TOD6	chrII_115241_C_T_2108	-0.0525617	1.07826	0.615963	FALSE
YBL055C	YBL055C	chrII_115241_C_T_2108	-0.113667	5.50297	0.00223642	TRUE
YBL059C-A	CMC2	chrII_110028_C_G_2073	-0.0419471	1.12814	0.593604	FALSE
YBL060W	YEL1	chrII_110028_C_G_2073	-0.186459	3.44014	0.0330717	FALSE
YBL061C	SKT5	chrII_105621_G_A_2040	0.0420446	2.58287	0.115748	FALSE
YBL063W	KIP1	chrII_105621_G_A_2040	0.135342	2.6461	0.105254	FALSE
YBL064C	PRX1	chrII_96372_G_A_2000	-0.0212945	0.865649	0.712684	FALSE
YBL066C	SEF1	chrII_96372_G_A_2000	0.0203658	0.497224	0.878458	FALSE
YBL067C	UBP13	chrII_93331_A_G_1987	-0.0109826	0.31675	0.950256	FALSE
YBL068W	PRS4	chrII_93331_A_G_1987	-0.143401	4.95716	0.00335664	FALSE
YBL069W	AST1	chrII_90284_G_T_1978	-0.112278	1.39537	0.471407	FALSE
YBL071C-B	YBL071C-B	chrII_90284_G_T_1978	-0.0938238	1.55737	0.398833	FALSE
YBL071W-A	KTI11	chrII_90284_G_T_1978	0.0738786	3.79694	0.019979	FALSE
YBL072C	RPS8A	chrII_90284_G_T_1978	-0.0132629	1.7423	0.322275	FALSE
YBL074C	AAR2	chrII_90284_G_T_1978	-0.0313312	2.70424	0.0962931	FALSE
YBL075C	SSA3	chrII_90284_G_T_1978	-0.0994066	1.02082	0.642945	FALSE
YBL076C	ILS1	chrII_90284_G_T_1978	0.0439295	2.01221	0.239907	FALSE
YBL078C	ATG8	chrII_73472_G_A_1888	0.0375702	2.39002	0.150607	FALSE
YBL079W	NUP170	chrII_73472_G_A_1888	0.0387046	1.19175	0.567052	FALSE
YBL080C	PET112	chrII_73472_G_A_1888	0.154291	2.00826	0.240858	FALSE
YBL084C	CDC27	chrII_69817_A_G_1869	-0.0352376	0.846097	0.722313	FALSE
YBL085W	BOI1	chrII_69817_A_G_1869	-0.105671	1.9243	0.266046	FALSE
YBL086C	YBL086C	chrII_69817_A_G_1869	-0.301499	4.79045	0.00459459	FALSE
YBL087C	RPL23A	chrII_69817_A_G_1869	-0.0175159	1.74386	0.32173	FALSE
YBL088C	TEL1	chrII_49379_T_A_1779	0.0171875	0.201759	0.984382	FALSE
YBL089W	AVT5	chrII_49379_T_A_1779	0.0826723	2.86896	0.0753466	FALSE
YBL090W	MRP21	chrII_49379_T_A_1779	-0.0356243	0.874532	0.708859	FALSE
YBL091C-A	SCS22	chrII_46777_C_T_1772	0.00422379	1.83246	0.294082	FALSE
YBL092W	RPL32	chrII_46777_C_T_1772	-0.0157873	2.65045	0.1044	FALSE
YBL093C	ROX3	chrII_45178_A_G_1759	0.0431908	1.64005	0.368204	FALSE
YBL095W	MRX3	chrII_45178_A_G_1759	-0.145463	5.94272	0.00141343	FALSE
YBL096C	YBL096C	chrII_45178_A_G_1759	-0.219088	3.39255	0.0351412	FALSE
YBL097W	BRN1	chrII_45178_A_G_1759	-0.0135178	1.21632	0.55668	FALSE
YBL098W	BNA4	chrII_45178_A_G_1759	0.163958	2.46659	0.13613	FALSE
YBL099W	ATP1	chrII_45178_A_G_1759	0.0309222	1.21026	0.558948	FALSE
YBL100C	YBL100C	chrII_45178_A_G_1759	-0.0518687	0.594361	0.835948	FALSE
YBL101C	ECM21	chrII_9950_G_T_1680	0.109056	2.08947	0.217868	FALSE
YBL102W	SFT2	chrII_9950_G_T_1680	0.0330756	1.92281	0.266416	FALSE
YBL103C	RTG3	chrII_9950_G_T_1680	0.0594449	3.26025	0.0415409	FALSE
YBL104C	SEA4	chrII_9950_G_T_1680	-0.0277903	2.38453	0.151356	FALSE
YBL105C	PKC1	chrII_9950_G_T_1680	-0.0376796	1.43218	0.452069	FALSE
YBL106C	SRO77	chrII_9950_G_T_1680	-0.00523591	3.39227	0.0351588	FALSE
YBL107C	MIX23	chrII_9950_G_T_1680	-0.099624	2.48222	0.133984	FALSE
YBL107W-A	YBL107W-A	chrII_9950_G_T_1680	-0.0559935	0.166617	0.989115	FALSE
YBL113C	YBL113C	chrII_9950_G_T_1680	-0.0166024	0.534334	0.862975	FALSE
YBR001C	NTH2	chrII_241704_T_C_2779	0.118502	3.86096	0.019817	FALSE
YBR002C	RER2	chrII_241704_T_C_2779	-0.00367928	1.12922	0.592948	FALSE
YBR003W	COQ1	chrII_241704_T_C_2779	-0.0965885	1.62362	0.374408	FALSE
YBR004C	GPI18	chrII_246575_T_C_2804	-0.106449	3.33433	0.0394906	FALSE
YBR005W	RCR1	chrII_246575_T_C_2804	0.0458525	2.49722	0.131138	FALSE
YBR006W	UGA2	chrII_246575_T_C_2804	0.0243851	1.48982	0.425348	FALSE
YBR007C	DSF2	chrII_252193_A_G_2837	0.0911931	1.39472	0.471766	FALSE
YBR008C	FLR1	chrII_252193_A_G_2837	-0.158284	3.5794	0.0270462	FALSE
YBR010W	HHT1	chrII_257430_C_T_2875	0.0108107	1.13587	0.589997	FALSE
YBR011C	IPP1	chrII_257430_C_T_2875	-0.013596	2.39739	0.149589	FALSE
YBR015C	MNN2	chrII_269291_C_T_2936	-0.00291603	0.571271	0.844758	FALSE
YBR016W	YBR016W	chrII_269291_C_T_2936	-0.0983551	12.1594	0	FALSE
YBR017C	KAP104	chrII_269291_C_T_2936	0.0051716	2.03994	0.230482	FALSE
YBR019C	GAL10	chrII_269291_C_T_2936	0.0667764	0.312963	0.951065	FALSE
YBR020W	GAL1	chrII_287260_A_C_3033	-0.352631	2.36814	0.154125	FALSE
YBR021W	FUR4	chrII_287260_A_C_3033	0.172479	3.67377	0.0232495	FALSE
YBR022W	POA1	chrII_287260_A_C_3033	0.0238602	3.00766	0.0595537	FALSE
YBR023C	CHS3	chrII_287260_A_C_3033	-0.0155821	0.677565	0.796514	FALSE
YBR028C	YPK3	chrII_295631_G_A_3084	0.140139	2.2224	0.185094	FALSE
YBR029C	CDS1	chrII_295631_G_A_3084	-0.00501813	0.409985	0.915965	FALSE
YBR030W	RKM3	chrII_300849_C_T_3107	-0.0676456	2.24717	0.178919	FALSE
YBR031W	RPL4A	chrII_300849_C_T_3107	0.11944	69.7316	0	FALSE
YBR033W	EDS1	chrII_304737_A_T_3133	0.152163	2.25593	0.17714	FALSE
YBR034C	HMT1	chrII_304737_A_T_3133	0.0403828	0.93686	0.681693	FALSE
YBR036C	CSG2	chrII_310706_T_C_3170	-0.0320588	3.06092	0.0559243	FALSE
YBR037C	SCO1	chrII_310706_T_C_3170	-0.44831	21.6825	0	FALSE
YBR038W	CHS2	chrII_310706_T_C_3170	0.0138783	1.41088	0.462524	FALSE
YBR039W	ATP3	chrII_316919_G_A_3207	0.0177048	0.941651	0.680039	FALSE
YBR040W	FIG1	chrII_316919_G_A_3207	0.175972	3.01976	0.0582151	FALSE
YBR042C	CST26	chrII_320428_A_G_3219	0.0386531	0.701546	0.786901	FALSE
YBR043C	QDR3	chrII_320428_A_G_3219	-0.0133907	0.688441	0.792662	FALSE
YBR044C	TCM62	chrII_320428_A_G_3219	0.0836189	1.84667	0.291169	FALSE
YBR045C	GIP1	chrII_330681_G_A_3292	-1.51235	41.591	0	FALSE
YBR046C	ZTA1	chrII_330681_G_A_3292	-0.350309	10.5267	0.000609756	FALSE
YBR048W	RPS11B	chrII_334216_A_G_3324	-0.00149858	1.86905	0.284931	FALSE
YBR049C	REB1	chrII_334216_A_G_3324	-0.0212349	1.5808	0.389447	FALSE
YBR054W	YRO2	chrII_344225_C_T_3384	-0.114564	1.6503	0.363535	FALSE
YBR055C	PRP6	chrII_344225_C_T_3384	-0.0042063	0.2215	0.979181	FALSE
YBR056W	YBR056W	chrII_344225_C_T_3384	-0.0826266	1.36004	0.487175	FALSE
YBR056W-A	YBR056W-A	chrII_356399_T_C_3487	0.106083	2.28513	0.170649	FALSE
YBR057C	MUM2	chrII_356399_T_C_3487	-0.0517304	0.922122	0.68889	FALSE
YBR058C	UBP14	chrII_356399_T_C_3487	0.276452	10.2399	0.000609756	FALSE
YBR058C-A	TSC3	chrII_356399_T_C_3487	0.00107657	0.564526	0.847686	FALSE
YBR061C	TRM7	chrII_365120_A_C_3555	-0.0126818	1.11195	0.602211	FALSE
YBR062C	YBR062C	chrII_365120_A_C_3555	0.0256907	2.32496	0.161331	FALSE
YBR063C	YBR063C	chrII_365120_A_C_3555	-0.452492	26.9752	0	TRUE
YBR065C	ECM2	chrII_370275_G_T_3583	0.173818	2.12482	0.210027	FALSE
YBR066C	NRG2	chrII_370275_G_T_3583	0.318518	92.2221	0	FALSE
YBR067C	TIP1	chrII_373487_C_G_3600	0.178881	6.21156	0.000821355	FALSE
YBR068C	BAP2	chrII_373487_C_G_3600	1.59049	43.2548	0	FALSE
YBR072W	HSP26	chrII_382584_A_G_3649	-0.250727	9.45201	0.000609756	FALSE
YBR073W	RDH54	chrII_382584_A_G_3649	-0.000334191	0.711461	0.782109	FALSE
YBR074W	PFF1	chrII_382584_A_G_3649	0.0567368	3.02261	0.0581495	FALSE
YBR076C-A	YBR076C-A	chrII_393947_T_C_3718	0.215853	4.69076	0.005	FALSE
YBR077C	SLM4	chrII_393947_T_C_3718	-0.00170975	1.19572	0.565343	FALSE
YBR078W	ECM33	chrII_393947_T_C_3718	0.0818502	9.179	0.000609756	FALSE
YBR079C	RPG1	chrII_395349_G_A_3727	-0.00216549	0.0783078	0.998538	FALSE
YBR080C	SEC18	chrII_395349_G_A_3727	-5.06197e-05	0.332345	0.944998	FALSE
YBR081C	SPT7	chrII_409209_G_A_3814	-0.0506655	2.36094	0.155241	FALSE
YBR082C	UBC4	chrII_409209_G_A_3814	-0.010492	0.423517	0.91024	FALSE
YBR083W	TEC1	chrII_409209_G_A_3814	0.319092	41.7052	0	FALSE
YBR084C-A	RPL19A	chrII_414714_G_A_3822	0.00297209	0.817569	0.733798	FALSE
YBR085C-A	YBR085C-A	chrII_422622_A_G_3908	-0.0118421	1.93005	0.26462	FALSE
YBR085W	AAC3	chrII_414714_G_A_3822	-0.543064	13.1696	0	FALSE
YBR086C	IST2	chrII_422622_A_G_3908	0.00520313	1.21515	0.557118	FALSE
YBR087W	RFC5	chrII_424811_T_C_3922	-0.00967005	1.50034	0.422007	FALSE
YBR088C	POL30	chrII_424811_T_C_3922	-0.00448545	0.65065	0.808971	FALSE
YBR091C	TIM12	chrII_427869_G_A_3944	0.108253	2.87412	0.0750087	FALSE
YBR092C	PHO3	chrII_427869_G_A_3944	0.523314	44.8172	0	FALSE
YBR094W	PBY1	chrII_434484_A_G_4001	0.141412	2.24252	0.179812	FALSE
YBR095C	RXT2	chrII_434484_A_G_4001	-0.0104668	1.16586	0.577782	FALSE
YBR096W	YBR096W	chrII_436647_G_A_4011	-0.0142532	0.445561	0.901845	FALSE
YBR097W	VPS15	chrII_436647_G_A_4011	0.0227789	0.5496	0.854296	FALSE
YBR098W	MMS4	chrII_436647_G_A_4011	-0.00407599	1.43271	0.45189	FALSE
YBR099C	YBR099C	chrII_448634_T_C_4073	-0.104452	1.42071	0.457568	FALSE
YBR101C	FES1	chrII_448634_T_C_4073	-0.0345529	0.777031	0.750534	FALSE
YBR102C	EXO84	chrII_448634_T_C_4073	0.0775704	0.657532	0.806381	FALSE
YBR103W	SIF2	chrII_448634_T_C_4073	-0.0195044	0.229528	0.977655	FALSE
YBR104W	YMC2	chrII_450832_A_T_4081	0.0517864	1.2504	0.543036	FALSE
YBR105C	VID24	chrII_450832_A_T_4081	-0.0653326	1.60838	0.379526	FALSE
YBR107C	IML3	chrII_453576_T_A_4099	-0.345597	3.11465	0.0507279	FALSE
YBR108W	AIM3	chrII_453576_T_A_4099	0.146056	1.61921	0.376029	FALSE
YBR109C	CMD1	chrII_461088_A_T_4181	0.0366437	5.18071	0.00301205	FALSE
YBR109W-A	YBR109W-A	chrII_461088_A_T_4181	-0.0152954	1.36339	0.485816	FALSE
YBR110W	ALG1	chrII_461088_A_T_4181	0.00552984	0.791645	0.7445	FALSE
YBR111C	YSA1	chrII_461088_A_T_4181	-0.0539452	3.28959	0.0406447	FALSE
YBR116C	YBR116C	chrII_474281_G_A_4291	-0.0582401	1.07307	0.619032	FALSE
YBR117C	TKL2	chrII_474281_G_A_4291	-0.211469	2.21577	0.187029	FALSE
YBR119W	MUD1	chrII_480510_C_A_4337	-0.158922	3.61761	0.0256271	FALSE
YBR120C	CBP6	chrII_480510_C_A_4337	-0.0662031	1.13134	0.591905	FALSE
YBR121C	GRS1	chrII_480510_C_A_4337	0.0321544	3.75338	0.0211831	FALSE
YBR122C	MRPL36	chrII_480510_C_A_4337	-0.00433977	0.319043	0.949767	FALSE
YBR123C	TFC1	chrII_489805_G_A_4394	0.0200141	1.42124	0.457298	FALSE
YBR125C	PTC4	chrII_489805_G_A_4394	-0.0939194	0.924518	0.687452	FALSE
YBR126C	TPS1	chrII_489805_G_A_4394	-0.141834	17.7525	0	FALSE
YBR126W-A	MEO1	chrII_491039_G_A_4397	0.786389	49.6105	0	FALSE
YBR126W-B	YBR126W-B	chrII_491039_G_A_4397	1.21988	34.2588	0	FALSE
YBR127C	VMA2	chrII_491039_G_A_4397	0.121394	19.1235	0	FALSE
YBR133C	HSL7	chrII_505129_G_A_4502	0.0156659	0.387561	0.924944	FALSE
YBR135W	CKS1	chrII_505129_G_A_4502	-0.117927	6.51878	0.000821355	FALSE
YBR136W	MEC1	chrII_505129_G_A_4502	0.0556084	2.07111	0.222315	FALSE
YBR137W	YBR137W	chrII_513777_T_C_4561	0.154085	9.18491	0.000609756	FALSE
YBR138C	YBR138C	chrII_513777_T_C_4561	0.0708053	0.633425	0.816642	FALSE
YBR141C	BMT2	chrII_527516_C_T_4625	0.077339	0.514508	0.870735	FALSE
YBR142W	MAK5	chrII_527516_C_T_4625	0.0363603	0.750102	0.763126	FALSE
YBR146W	MRPS9	chrII_535991_C_G_4673	0.0257807	1.08523	0.61331	FALSE
YBR147W	RTC2	chrII_535991_C_G_4673	0.420208	25.7285	0	FALSE
YBR149W	ARA1	chrII_541210_T_C_4721	0.0653931	5.36595	0.00280374	FALSE
YBR150C	TBS1	chrII_541210_T_C_4721	0.376124	17.3105	0	FALSE
YBR152W	SPP381	chrII_546010_C_T_4776	-0.110353	1.10534	0.604481	FALSE
YBR153W	RIB7	chrII_546010_C_T_4776	-0.0273169	2.61121	0.110883	FALSE
YBR154C	RPB5	chrII_550736_C_T_4811	0.0188961	1.62791	0.37278	FALSE
YBR155W	CNS1	chrII_550736_C_T_4811	-0.0224851	1.38131	0.477366	FALSE
YBR156C	SLI15	chrII_550736_C_T_4811	0.102836	2.79043	0.0840072	FALSE
YBR157C	ICS2	chrII_550736_C_T_4811	-0.20269	3.17989	0.0466043	FALSE
YBR163W	EXO5	chrII_567613_A_C_4954	0.0838094	1.99701	0.2437	FALSE
YBR164C	ARL1	chrII_567613_A_C_4954	0.0248298	1.37924	0.478221	FALSE
YBR165W	UBS1	chrII_569874_C_G_4968	0.0475427	1.41713	0.45938	FALSE
YBR166C	TYR1	chrII_569874_C_G_4968	-0.13107	3.65279	0.0243537	FALSE
YBR167C	POP7	chrII_569874_C_G_4968	-0.0163534	0.640766	0.814084	FALSE
YBR168W	PEX32	chrII_573669_G_T_4988	-0.0605473	0.36312	0.934751	FALSE
YBR169C	SSE2	chrII_573669_G_T_4988	-0.236644	9.93151	0.000609756	FALSE
YBR176W	ECM31	chrII_584923_A_G_5071	-0.124389	3.24471	0.0424025	FALSE
YBR177C	EHT1	chrII_584923_A_G_5071	0.0138312	2.57974	0.116208	FALSE
YBR181C	RPS6B	chrII_596357_A_G_5149	-0.0045637	0.300143	0.955557	FALSE
YBR182C	SMP1	chrII_596357_A_G_5149	-0.666456	14.5289	0	FALSE
YBR183W	YPC1	chrII_596357_A_G_5149	0.120396	3.30412	0.040107	FALSE
YBR184W	YBR184W	chrII_596357_A_G_5149	0.139543	0.633042	0.816767	FALSE
YBR185C	MBA1	chrII_596357_A_G_5149	0.0173459	1.33568	0.500506	FALSE
YBR187W	GDT1	chrII_602697_G_A_5214	0.0119653	0.954051	0.676087	FALSE
YBR188C	NTC20	chrII_602697_G_A_5214	-0.0502822	0.855822	0.717711	FALSE
YBR189W	RPS9B	chrII_602697_G_A_5214	-0.00243284	0.583131	0.839437	FALSE
YBR190W	YBR190W	chrII_608458_G_A_5251	-0.0700718	1.6162	0.376961	FALSE
YBR191W	RPL21A	chrII_608458_G_A_5251	-0.00582467	1.03085	0.638982	FALSE
YBR191W-A	YBR191W-A	chrII_608458_G_A_5251	0.0393252	1.00918	0.648871	FALSE
YBR192W	RIM2	chrII_608458_G_A_5251	0.00707623	0.228662	0.97782	FALSE
YBR193C	MED8	chrII_608593_G_A_5252	-0.0598386	0.38376	0.926416	FALSE
YBR194W	AIM4	chrII_608593_G_A_5252	-0.289903	12.4208	0	FALSE
YBR195C	MSI1	chrII_608593_G_A_5252	-0.0952894	1.46202	0.43805	FALSE
YBR196C	PGI1	chrII_608593_G_A_5252	0.218967	108.062	0	FALSE
YBR196C-A	YBR196C-A	chrII_608593_G_A_5252	-0.0806346	1.60177	0.382172	FALSE
YBR197C	YBR197C	chrII_608593_G_A_5252	-0.00122136	0.1817	0.986615	FALSE
YBR198C	TAF5	chrII_622637_A_G_5325	0.0150846	0.749279	0.763497	FALSE
YBR199W	KTR4	chrII_622637_A_G_5325	0.0439292	2.13234	0.208387	FALSE
YBR200W	BEM1	chrII_622637_A_G_5325	0.0432408	0.441556	0.902979	FALSE
YBR203W	COS111	chrII_632180_C_T_5397	0.174227	2.51013	0.128312	FALSE
YBR204C	LDH1	chrII_632180_C_T_5397	0.0712946	0.715962	0.780173	FALSE
YBR205W	KTR3	chrII_634368_A_G_5405	-0.001267	0.879912	0.707198	FALSE
YBR206W	YBR206W	chrII_634368_A_G_5405	0.0594649	0.716591	0.779902	FALSE
YBR207W	FTH1	chrII_636702_T_C_5411	-0.0231624	1.26168	0.536527	FALSE
YBR208C	DUR1,2	chrII_636702_T_C_5411	-0.133962	2.67597	0.101058	FALSE
YBR210W	ERV15	chrII_650619_A_G_5500	-0.0111918	1.41421	0.460849	FALSE
YBR211C	AME1	chrII_650619_A_G_5500	-0.435468	11.0654	0	FALSE
YBR212W	NGR1	chrII_650619_A_G_5500	0.0596309	1.57994	0.38969	FALSE
YBR213W	MET8	chrII_650619_A_G_5500	0.0868923	4.0488	0.0154882	FALSE
YBR215W	HPC2	chrII_653620_A_T_5509	0.0539494	0.959207	0.674426	FALSE
YBR216C	YBP1	chrII_653620_A_T_5509	0.153539	1.62254	0.374822	FALSE
YBR217W	ATG12	chrII_661578_C_T_5538	-0.0438791	0.806792	0.737152	FALSE
YBR218C	PYC2	chrII_661578_C_T_5538	0.0514483	1.39777	0.470074	FALSE
YBR220C	YBR220C	chrII_665139_G_C_5549	0.326156	2.40349	0.148631	FALSE
YBR221C	PDB1	chrII_665139_G_C_5549	0.00371328	0.1135	0.994717	FALSE
YBR222C	PCS60	chrII_665139_G_C_5549	0.0639316	0.734394	0.770582	FALSE
YBR223C	TDP1	chrII_665139_G_C_5549	-0.0142907	0.809047	0.736478	FALSE
YBR225W	YBR225W	chrII_678799_C_T_5596	0.0950273	0.294668	0.957411	FALSE
YBR227C	MCX1	chrII_678799_C_T_5596	0.0525536	1.97083	0.25276	FALSE
YBR228W	SLX1	chrII_678799_C_T_5596	0.0158498	0.984017	0.662874	FALSE
YBR229C	ROT2	chrII_678799_C_T_5596	-0.0390067	1.50533	0.419914	FALSE
YBR233W-A	DAD3	chrII_685213_C_T_5629	-0.178192	7.48372	0.000609756	FALSE
YBR234C	ARC40	chrII_685213_C_T_5629	-0.0604223	2.92765	0.068703	FALSE
YBR235W	VHC1	chrII_687566_G_A_5637	0.0626398	2.35587	0.156064	FALSE
YBR236C	ABD1	chrII_687566_G_A_5637	-0.000774551	0.810033	0.736183	FALSE
YBR237W	PRP5	chrII_687566_G_A_5637	-0.0221862	1.71483	0.33539	FALSE
YBR238C	YBR238C	chrII_702198_C_T_5700	-0.0893596	0.897365	0.699081	FALSE
YBR239C	ERT1	chrII_702198_C_T_5700	-0.129822	0.877487	0.707946	FALSE
YBR240C	THI2	chrII_702198_C_T_5700	-0.412049	10.3893	0.000609756	FALSE
YBR242W	YBR242W	chrII_705344_C_T_5718	0.0895761	2.63967	0.106605	FALSE
YBR243C	ALG7	chrII_705344_C_T_5718	-0.00223715	1.02943	0.639615	FALSE
YBR244W	GPX2	chrII_709212_A_G_5735	0.0342985	0.492669	0.880562	FALSE
YBR245C	ISW1	chrII_709212_A_G_5735	-0.00607401	1.58812	0.387455	FALSE
YBR246W	RRT2	chrII_714094_C_T_5762	-0.26806	9.65622	0.000609756	FALSE
YBR247C	ENP1	chrII_714094_C_T_5762	-0.011619	1.01613	0.64526	FALSE
YBR248C	HIS7	chrII_716118_T_C_5770	0.0275693	2.25629	0.177067	FALSE
YBR249C	ARO4	chrII_716118_T_C_5770	0.0860534	9.66229	0.000609756	FALSE
YBR251W	MRPS5	chrII_723865_G_A_5825	-0.0268658	1.05884	0.626135	FALSE
YBR252W	DUT1	chrII_723865_G_A_5825	0.0347062	1.24787	0.544169	FALSE
YBR253W	SRB6	chrII_723865_G_A_5825	0.08052	3.6542	0.0243426	FALSE
YBR254C	TRS20	chrII_723865_G_A_5825	0.130541	3.47739	0.0316124	FALSE
YBR255C-A	RCF3	chrII_727541_C_T_5841	0.055941	1.86101	0.287063	FALSE
YBR255W	MTC4	chrII_723865_G_A_5825	-0.00833054	0.489223	0.882129	FALSE
YBR256C	RIB5	chrII_727541_C_T_5841	-0.284761	42.0941	0	FALSE
YBR257W	POP4	chrII_727541_C_T_5841	0.0252185	0.462023	0.89447	FALSE
YBR258C	SHG1	chrII_727541_C_T_5841	0.0291568	1.95502	0.257943	FALSE
YBR259W	YBR259W	chrII_727541_C_T_5841	-0.347329	6.22962	0.000821355	FALSE
YBR260C	RGD1	chrII_736599_A_C_5919	-0.113556	3.57623	0.0271195	FALSE
YBR261C	TAE1	chrII_736599_A_C_5919	-0.0358382	1.08623	0.612999	FALSE
YBR262C	MIC12	chrII_736599_A_C_5919	-0.0288993	1.31021	0.513096	FALSE
YBR263W	SHM1	chrII_736599_A_C_5919	0.0402875	3.01768	0.0584264	FALSE
YBR267W	REI1	chrII_741097_C_T_5948	0.0365178	2.72808	0.0922729	FALSE
YBR268W	MRPL37	chrII_741097_C_T_5948	-0.0535031	1.57236	0.393107	FALSE
YBR269C	SDH8	chrII_742472_A_G_5959	-0.0126087	1.71517	0.33525	FALSE
YBR270C	BIT2	chrII_742472_A_G_5959	0.0451113	0.296709	0.956723	FALSE
YBR271W	EFM2	chrII_746619_C_T_5984	0.195871	4.52577	0.0067258	FALSE
YBR272C	HSM3	chrII_746619_C_T_5984	-0.0242809	0.406966	0.916949	FALSE
YBR273C	UBX7	chrII_746619_C_T_5984	0.078509	3.32406	0.0398829	FALSE
YBR274W	CHK1	chrII_746619_C_T_5984	-0.0241756	0.291136	0.958602	FALSE
YBR275C	RIF1	chrII_746619_C_T_5984	-0.211888	6.06344	0.00141343	FALSE
YBR276C	PPS1	chrII_764939_A_T_6091	-0.113109	1.89358	0.276033	FALSE
YBR278W	DPB3	chrII_764939_A_T_6091	-0.22807	10.2847	0.000609756	FALSE
YBR279W	PAF1	chrII_764939_A_T_6091	-0.0879977	2.07103	0.222333	FALSE
YBR280C	SAF1	chrII_764939_A_T_6091	-0.0545891	0.212364	0.982068	FALSE
YBR281C	DUG2	chrII_764939_A_T_6091	-0.19663	6.93369	0.000821355	FALSE
YBR282W	MRPL27	chrII_769003_G_A_6118	-0.0950101	2.77923	0.0853351	FALSE
YBR283C	SSH1	chrII_769003_G_A_6118	0.020514	1.21807	0.556023	FALSE
YBR284W	YBR284W	chrII_774263_A_G_6145	-0.198836	1.96375	0.255339	FALSE
YBR285W	YBR285W	chrII_774263_A_G_6145	-0.392656	10.9114	0	FALSE
YBR286W	APE3	chrII_774263_A_G_6145	0.0948318	4.07128	0.0146606	FALSE
YBR287W	YBR287W	chrII_774263_A_G_6145	0.110037	8.25208	0.000609756	FALSE
YBR288C	APM3	chrII_774263_A_G_6145	0.00761345	1.40879	0.463677	FALSE
YBR289W	SNF5	chrII_774263_A_G_6145	-0.0529721	1.83541	0.293644	FALSE
YBR290W	BSD2	chrII_788501_G_C_6255	0.0770991	3.31667	0.0400357	FALSE
YBR291C	CTP1	chrII_788501_G_C_6255	-0.0478684	4.69638	0.005	FALSE
YBR292C	YBR292C	chrII_788501_G_C_6255	0.148086	0.774327	0.751973	FALSE
YBR293W	VBA2	chrII_788501_G_C_6255	1.56729	458.434	0	FALSE
YBR294W	SUL1	chrII_791380_A_G_6269	-0.0454256	5.45558	0.00253165	FALSE
YBR295W	PCA1	chrII_791380_A_G_6269	-0.381007	14.132	0	FALSE
YBR297W	MAL33	chrII_807174_T_A_6471	-0.631359	18.3384	0	FALSE
YBR298C	MAL31	chrII_807174_T_A_6471	-0.0752109	0.873079	0.709307	FALSE
YBR299W	MAL32	chrII_807174_T_A_6471	0.160602	0.479108	0.88645	FALSE
YBR301W	PAU24	chrII_807174_T_A_6471	0.0604278	0.119453	0.994142	FALSE
YCL002C	YCL002C	chrIII_108125_T_C_7131	0.0683455	0.8932	0.701026	FALSE
YCL005W	LDB16	chrIII_108125_T_C_7131	0.0188158	0.470268	0.890104	FALSE
YCL005W-A	VMA9	chrIII_108125_T_C_7131	0.0139684	0.368206	0.932722	FALSE
YCL010C	SGF29	chrIII_103341_C_A_7118	0.0853663	1.22049	0.55513	FALSE
YCL011C	GBP2	chrIII_103341_C_A_7118	-0.0136741	2.29926	0.167064	FALSE
YCL012C	YCL012C	chrIII_103341_C_A_7118	-0.0540896	1.7519	0.319119	FALSE
YCL014W	BUD3	chrIII_103341_C_A_7118	0.022224	0.863835	0.713696	FALSE
YCL016C	DCC1	chrIII_103341_C_A_7118	-0.0664236	1.17597	0.573307	FALSE
YCL017C	NFS1	chrIII_103341_C_A_7118	-0.00420931	0.281004	0.961594	FALSE
YCL018W	LEU2	chrIII_103341_C_A_7118	-0.075065	3.38879	0.0354149	FALSE
YCL026C-B	HBN1	chrIII_71636_T_A_6987	-0.132091	10.0213	0.000609756	FALSE
YCL027W	FUS1	chrIII_71636_T_A_6987	-0.96437	78.064	0	FALSE
YCL030C	HIS4	chrIII_66138_G_C_6954	-0.173883	25.3376	0	FALSE
YCL031C	RRP7	chrIII_66138_G_C_6954	-0.063117	2.32926	0.160238	FALSE
YCL032W	STE50	chrIII_62698_T_A_6941	0.00134007	0.176178	0.9877	FALSE
YCL033C	MXR2	chrIII_62698_T_A_6941	0.179548	5.34741	0.00280374	FALSE
YCL034W	LSB5	chrIII_62698_T_A_6941	0.631777	75.278	0	FALSE
YCL035C	GRX1	chrIII_60687_T_C_6931	-0.0148978	1.15318	0.582102	FALSE
YCL036W	GFD2	chrIII_60687_T_C_6931	0.264203	2.77728	0.0854555	FALSE
YCL043C	PDI1	chrIII_49221_G_A_6854	-0.0628137	3.84095	0.0199454	FALSE
YCL044C	MGR1	chrIII_49221_G_A_6854	0.0940875	0.625275	0.819594	FALSE
YCL045C	EMC1	chrIII_45145_G_A_6835	0.0234466	0.458127	0.896493	FALSE
YCL047C	POF1	chrIII_45145_G_A_6835	0.16085	3.74762	0.0213988	FALSE
YCL049C	YCL049C	chrIII_38814_T_G_6787	0.76995	88.1893	0	FALSE
YCL050C	APA1	chrIII_38814_T_G_6787	-0.0598099	1.95452	0.258063	FALSE
YCL051W	LRE1	chrIII_38814_T_G_6787	-0.0931697	0.732957	0.771343	FALSE
YCL059C	KRR1	chrIII_22397_G_A_6677	-0.0222313	1.08496	0.613394	FALSE
YCL061C	MRC1	chrIII_22397_G_A_6677	0.0617983	1.38501	0.476097	FALSE
YCL064C	CHA1	chrIII_13881_C_A_6569	0.303298	3.81827	0.019979	FALSE
YCL069W	VBA3	chrIII_13881_C_A_6569	-0.0904359	1.81525	0.299169	FALSE
YCR002C	CDC10	chrIII_108125_T_C_7131	0.0161993	1.16041	0.580187	FALSE
YCR004C	YCP4	chrIII_108125_T_C_7131	-0.0691043	2.77876	0.0853639	FALSE
YCR005C	CIT2	chrIII_108125_T_C_7131	-0.01827	0.610292	0.828607	FALSE
YCR007C	YCR007C	chrIII_135044_G_C_7282	0.120329	2.24329	0.179664	FALSE
YCR008W	SAT4	chrIII_135044_G_C_7282	-0.0817969	0.39368	0.92224	FALSE
YCR009C	RVS161	chrIII_135044_G_C_7282	-0.0813835	3.23676	0.0432221	FALSE
YCR011C	ADP1	chrIII_135044_G_C_7282	-0.0934278	2.823	0.0794552	FALSE
YCR013C	YCR013C	chrIII_135044_G_C_7282	0.0674461	2.05185	0.227745	FALSE
YCR014C	POL4	chrIII_135044_G_C_7282	-0.0418953	0.571395	0.844694	FALSE
YCR015C	CTO1	chrIII_135044_G_C_7282	0.0363086	0.529773	0.865319	FALSE
YCR017C	CWH43	chrIII_154005_C_T_7410	-0.00945125	0.28009	0.961859	FALSE
YCR018C-A	YCR018C-A	chrIII_154005_C_T_7410	0.0231201	0.892989	0.701124	FALSE
YCR019W	MAK32	chrIII_154005_C_T_7410	0.346843	6.48025	0.000821355	FALSE
YCR020C	PET18	chrIII_154005_C_T_7410	0.346392	22.2141	0	FALSE
YCR023C	YCR023C	chrIII_161785_T_C_7445	0.287528	8.31177	0.000609756	FALSE
YCR024C	SLM5	chrIII_161785_T_C_7445	0.0500587	1.38111	0.477435	FALSE
YCR024C-A	PMP1	chrIII_162941_C_A_7446	0.660788	137.889	0	TRUE
YCR024C-B	YCR024C-B	chrIII_162941_C_A_7446	0.0457952	5.23464	0.00301205	FALSE
YCR028C-A	RIM1	chrIII_173853_G_A_7521	-0.038739	1.77977	0.310728	FALSE
YCR030C	SYP1	chrIII_173853_G_A_7521	0.353508	14.1005	0	FALSE
YCR031C	RPS14A	chrIII_176637_G_A_7534	0.0149388	1.3733	0.481377	FALSE
YCR032W	BPH1	chrIII_176637_G_A_7534	0.150551	2.07096	0.222349	FALSE
YCR033W	SNT1	chrIII_176637_G_A_7534	0.175662	6.76621	0.000821355	FALSE
YCR035C	RRP43	chrIII_201163_C_T_7630	-0.0171637	0.463176	0.893855	FALSE
YCR037C	PHO87	chrIII_201163_C_T_7630	0.0127215	0.953605	0.67623	FALSE
YCR038C	BUD5	chrIII_201163_C_T_7630	-0.05713	0.792612	0.743884	FALSE
YCR039C	MATALPHA2	chrIII_201163_C_T_7630	-0.195382	6.27171	0.000821355	FALSE
YCR042C	TAF2	chrIII_201163_C_T_7630	0.497191	33.9905	0	FALSE
YCR043C	YCR043C	chrIII_201163_C_T_7630	0.220951	24.4772	0	FALSE
YCR044C	PER1	chrIII_201163_C_T_7630	0.0361658	0.328136	0.946322	FALSE
YCR046C	IMG1	chrIII_201163_C_T_7630	0.376039	46.1462	0	FALSE
YCR047C	BUD23	chrIII_201163_C_T_7630	-0.0950462	3.4998	0.0307381	FALSE
YCR048W	ARE1	chrIII_201163_C_T_7630	0.0425115	0.699202	0.788022	FALSE
YCR054C	CTR86	chrIII_201163_C_T_7630	-0.0268048	0.570553	0.845134	FALSE
YCR057C	PWP2	chrIII_201163_C_T_7630	0.100157	2.45839	0.137647	FALSE
YCR059C	YIH1	chrIII_201163_C_T_7630	0.0748141	2.49553	0.131432	FALSE
YCR060W	TAH1	chrIII_201163_C_T_7630	-0.391121	12.9333	0	FALSE
YCR063W	BUD31	chrIII_247889_C_T_7936	0.021043	2.60927	0.11112	FALSE
YCR064C	YCR064C	chrIII_247889_C_T_7936	-0.519086	4.20786	0.0116914	FALSE
YCR065W	HCM1	chrIII_247889_C_T_7936	-0.115178	2.65245	0.104275	FALSE
YCR067C	SED4	chrIII_247889_C_T_7936	0.0821767	1.05289	0.62869	FALSE
YCR071C	IMG2	chrIII_247889_C_T_7936	-0.0199386	0.803118	0.73825	FALSE
YCR072C	RSA4	chrIII_247889_C_T_7936	-0.021763	1.93922	0.262451	FALSE
YCR073C	SSK22	chrIII_247889_C_T_7936	-0.144414	2.63641	0.107221	FALSE
YCR075C	ERS1	chrIII_247889_C_T_7936	0.151985	3.25996	0.0415431	FALSE
YCR076C	FUB1	chrIII_247889_C_T_7936	-0.209345	7.04819	0.000821355	FALSE
YCR077C	PAT1	chrIII_247889_C_T_7936	-0.0394082	0.747104	0.764462	FALSE
YCR081W	SRB8	chrIII_247889_C_T_7936	-0.111193	1.32944	0.504267	FALSE
YCR083W	TRX3	chrIII_247889_C_T_7936	0.0663656	1.34728	0.493541	FALSE
YCR084C	TUP1	chrIII_247889_C_T_7936	-0.495123	32.403	0	FALSE
YCR087C-A	YCR087C-A	chrIII_247889_C_T_7936	-0.0526205	1.6382	0.368905	FALSE
YCR087W	YCR087W	chrIII_247889_C_T_7936	-0.102756	3.21702	0.044707	FALSE
YCR089W	FIG2	chrIII_291194_A_G_8233	-0.0124891	0.97345	0.667835	FALSE
YCR090C	YCR090C	chrIII_291194_A_G_8233	-0.0379923	2.38246	0.151639	FALSE
YCR091W	KIN82	chrIII_291194_A_G_8233	0.0695292	0.578057	0.841203	FALSE
YCR092C	MSH3	chrIII_291194_A_G_8233	-0.237959	5.24589	0.00301205	FALSE
YCR093W	CDC39	chrIII_291194_A_G_8233	-0.043149	1.60721	0.379993	FALSE
YCR095C	OCA4	chrIII_291194_A_G_8233	0.00860723	0.674712	0.797929	FALSE
YCR097W	HMRA1	chrIII_291194_A_G_8233	0.0279242	2.50428	0.129662	FALSE
YCR099C	YCR099C	chrIII_291194_A_G_8233	-0.290109	1.49584	0.42345	FALSE
YCR102C	YCR102C	chrIII_313577_T_C_8481	0.327052	5.57202	0.00201681	FALSE
YCR106W	RDS1	chrIII_313577_T_C_8481	-0.437939	8.65217	0.000609756	FALSE
YDL001W	RMD1	chrIV_446850_A_G_11017	0.0319422	1.27302	0.531254	FALSE
YDL002C	NHP10	chrIV_446850_A_G_11017	-0.18953	6.1274	0.00116621	FALSE
YDL003W	MCD1	chrIV_446850_A_G_11017	-0.0208364	0.257977	0.968663	FALSE
YDL005C	MED2	chrIV_440916_A_C_10993	-0.0401741	0.856613	0.717356	FALSE
YDL006W	PTC1	chrIV_440916_A_C_10993	0.0036049	1.07469	0.618076	FALSE
YDL008W	APC11	chrIV_433317_C_A_10919	-0.0975871	3.53782	0.0287082	FALSE
YDL010W	GRX6	chrIV_433317_C_A_10919	0.0309208	2.31795	0.162958	FALSE
YDL014W	NOP1	chrIV_426094_T_C_10893	0.00075909	1.10113	0.605734	FALSE
YDL015C	TSC13	chrIV_426094_T_C_10893	-0.0749057	3.50138	0.0306806	FALSE
YDL016C	YDL016C	chrIV_426094_T_C_10893	0.0899048	1.96284	0.255676	FALSE
YDL017W	CDC7	chrIV_426094_T_C_10893	-0.0572886	0.524192	0.867183	FALSE
YDL018C	ERP3	chrIV_422799_G_A_10878	-0.160324	7.21274	0.000609756	FALSE
YDL019C	OSH2	chrIV_422799_G_A_10878	-0.0553905	1.07722	0.616577	FALSE
YDL020C	RPN4	chrIV_415089_C_A_10850	-0.0196974	1.19062	0.567537	FALSE
YDL021W	GPM2	chrIV_415089_C_A_10850	-0.0143631	2.02897	0.234339	FALSE
YDL025C	RTK1	chrIV_400864_A_G_10777	0.0940066	1.80202	0.303338	FALSE
YDL027C	MRX9	chrIV_400864_A_G_10777	-0.151008	6.17385	0.00107914	FALSE
YDL028C	MPS1	chrIV_400864_A_G_10777	0.0158991	1.83321	0.29397	FALSE
YDL030W	PRP9	chrIV_398875_A_C_10763	0.0103545	0.459493	0.895805	FALSE
YDL031W	DBP10	chrIV_398875_A_C_10763	-0.009586	0.301566	0.955	FALSE
YDL033C	SLM3	chrIV_388841_G_T_10691	-0.0611309	0.718235	0.779195	FALSE
YDL035C	GPR1	chrIV_388841_G_T_10691	-0.063706	1.6779	0.352367	FALSE
YDL036C	PUS9	chrIV_388841_G_T_10691	0.454204	15.6489	0	FALSE
YDL039C	PRM7	chrIV_388841_G_T_10691	0.066263	1.69937	0.342956	FALSE
YDL040C	NAT1	chrIV_372674_C_A_10580	0.116918	4.70272	0.005	FALSE
YDL042C	SIR2	chrIV_372674_C_A_10580	-0.182505	9.02888	0.000609756	TRUE
YDL043C	PRP11	chrIV_372674_C_A_10580	0.0423262	2.38498	0.151294	FALSE
YDL044C	MTF2	chrIV_372674_C_A_10580	-0.0190614	0.992726	0.658323	FALSE
YDL045C	FAD1	chrIV_372674_C_A_10580	-0.0224774	1.68072	0.351535	FALSE
YDL045W-A	MRP10	chrIV_372674_C_A_10580	-0.123473	4.84596	0.0041878	FALSE
YDL049C	KNH1	chrIV_364948_A_G_10545	0.0129814	2.29969	0.166951	FALSE
YDL051W	LHP1	chrIV_364948_A_G_10545	-0.0481099	2.60443	0.112115	FALSE
YDL053C	PBP4	chrIV_361695_A_T_10530	-0.0216126	1.54729	0.401576	FALSE
YDL054C	MCH1	chrIV_361695_A_T_10530	0.0827831	2.35106	0.156853	FALSE
YDL055C	PSA1	chrIV_356226_A_G_10472	0.120441	24.943	0	FALSE
YDL056W	MBP1	chrIV_356226_A_G_10472	0.0692051	1.59482	0.384987	FALSE
YDL057W	YDL057W	chrIV_356226_A_G_10472	-0.210095	3.57982	0.0270365	FALSE
YDL058W	USO1	chrIV_344363_G_A_10414	0.00375382	1.10368	0.604974	FALSE
YDL059C	RAD59	chrIV_344363_G_A_10414	-0.0594428	1.96874	0.253475	FALSE
YDL060W	TSR1	chrIV_344363_G_A_10414	0.0499683	1.97558	0.251371	FALSE
YDL061C	RPS29B	chrIV_344363_G_A_10414	0.000770993	1.80331	0.303057	FALSE
YDL063C	SYO1	chrIV_336275_A_G_10378	0.0692549	1.21354	0.557718	FALSE
YDL064W	UBC9	chrIV_336275_A_G_10378	-0.0173897	0.677729	0.796433	FALSE
YDL065C	PEX19	chrIV_336275_A_G_10378	0.0415406	1.8063	0.30241	FALSE
YDL066W	IDP1	chrIV_336275_A_G_10378	0.0849497	6.05645	0.00141343	FALSE
YDL067C	COX9	chrIV_333169_T_C_10362	0.0511038	5.12644	0.00301205	FALSE
YDL069C	CBS1	chrIV_333169_T_C_10362	-0.00689319	2.0379	0.231188	FALSE
YDL070W	BDF2	chrIV_333169_T_C_10362	-0.0633326	1.42953	0.453047	FALSE
YDL072C	YET3	chrIV_333169_T_C_10362	-0.0868158	6.67324	0.000821355	FALSE
YDL073W	AHK1	chrIV_333169_T_C_10362	-0.115738	2.38462	0.151344	FALSE
YDL074C	BRE1	chrIV_320785_G_A_10276	-0.0172643	0.387359	0.925022	FALSE
YDL075W	RPL31A	chrIV_320785_G_A_10276	0.0150104	3.85919	0.0198294	FALSE
YDL076C	RXT3	chrIV_320785_G_A_10276	-0.058035	5.46727	0.00253165	FALSE
YDL077C	VAM6	chrIV_320785_G_A_10276	0.0485577	1.761	0.31681	FALSE
YDL080C	THI3	chrIV_310132_T_C_10201	-0.033633	0.291366	0.958525	FALSE
YDL081C	RPP1A	chrIV_310132_T_C_10201	0.00682273	0.951055	0.677052	FALSE
YDL083C	RPS16B	chrIV_306463_C_T_10176	0.00592684	0.947905	0.678056	FALSE
YDL084W	SUB2	chrIV_306463_C_T_10176	0.0248885	3.17509	0.0466346	FALSE
YDL088C	ASM4	chrIV_298304_G_A_10144	-0.0696304	2.52591	0.125135	FALSE
YDL089W	NUR1	chrIV_298304_G_A_10144	-0.215662	7.33386	0.000609756	FALSE
YDL090C	RAM1	chrIV_298304_G_A_10144	-0.125374	1.89357	0.276038	FALSE
YDL091C	UBX3	chrIV_298304_G_A_10144	-0.00102256	0.939427	0.680769	FALSE
YDL092W	SRP14	chrIV_289439_A_C_10090	-0.0406981	2.35901	0.15555	FALSE
YDL093W	PMT5	chrIV_289439_A_C_10090	-0.0288548	0.907504	0.695336	FALSE
YDL095W	PMT1	chrIV_289439_A_C_10090	-0.106058	7.77696	0.000609756	FALSE
YDL097C	RPN6	chrIV_284914_A_G_10078	-0.0243796	0.560474	0.84936	FALSE
YDL098C	SNU23	chrIV_284914_A_G_10078	0.0110903	0.557725	0.85058	FALSE
YDL099W	BUG1	chrIV_283814_A_G_10077	-0.0567563	2.05849	0.224553	FALSE
YDL100C	GET3	chrIV_283814_A_G_10077	-0.00300059	1.13989	0.588303	FALSE
YDL101C	DUN1	chrIV_280295_T_C_10059	-0.0583265	1.14023	0.588131	FALSE
YDL102W	POL3	chrIV_280295_T_C_10059	0.024549	0.290036	0.958973	FALSE
YDL103C	QRI1	chrIV_275180_A_T_10028	0.231842	15.6124	0	FALSE
YDL104C	QRI7	chrIV_275180_A_T_10028	-0.00497063	1.05459	0.627957	FALSE
YDL105W	NSE4	chrIV_275180_A_T_10028	0.123531	1.29195	0.521964	FALSE
YDL106C	PHO2	chrIV_275180_A_T_10028	0.127214	2.69015	0.0983089	FALSE
YDL107W	MSS2	chrIV_275180_A_T_10028	-0.107791	1.21947	0.555501	FALSE
YDL108W	KIN28	chrIV_275180_A_T_10028	-0.0467516	0.606838	0.830316	FALSE
YDL110C	TMA17	chrIV_275180_A_T_10028	-0.0232531	1.68294	0.350495	FALSE
YDL111C	RRP42	chrIV_252925_G_A_9921	0.0121705	1.78413	0.30928	FALSE
YDL112W	TRM3	chrIV_252925_G_A_9921	0.000583165	0.546445	0.856174	FALSE
YDL113C	ATG20	chrIV_252925_G_A_9921	-0.0168917	1.00443	0.651453	FALSE
YDL115C	IWR1	chrIV_252925_G_A_9921	-0.145137	4.31957	0.00993939	FALSE
YDL116W	NUP84	chrIV_252925_G_A_9921	0.0561251	3.68379	0.0231242	FALSE
YDL119C	HEM25	chrIV_246316_T_C_9890	0.0583676	0.472445	0.889204	FALSE
YDL120W	YFH1	chrIV_246316_T_C_9890	0.151619	5.28041	0.00300347	FALSE
YDL125C	HNT1	chrIV_239693_T_C_9836	-0.0424138	3.44373	0.0327887	FALSE
YDL126C	CDC48	chrIV_239693_T_C_9836	0.00510372	1.50479	0.420142	FALSE
YDL127W	PCL2	chrIV_232597_C_A_9803	-0.0418387	1.31637	0.51023	FALSE
YDL128W	VCX1	chrIV_232597_C_A_9803	-0.142884	15.5999	0	TRUE
YDL130W	RPP1B	chrIV_229466_C_A_9777	-0.00463071	1.19137	0.567217	FALSE
YDL130W-A	STF1	chrIV_229466_C_A_9777	-0.0363838	1.84492	0.291642	FALSE
YDL131W	LYS21	chrIV_229466_C_A_9777	-0.114808	20.3599	0	FALSE
YDL133C-A	RPL41B	chrIV_221504_A_G_9740	-0.00807176	1.03446	0.637217	FALSE
YDL133W	SRF1	chrIV_221504_A_G_9740	0.0264148	1.05241	0.628895	FALSE
YDL137W	ARF2	chrIV_216465_A_G_9720	-0.0565108	12.4878	0	FALSE
YDL138W	RGT2	chrIV_216465_A_G_9720	0.221007	8.10516	0.000609756	FALSE
YDL140C	RPO21	chrIV_205915_G_A_9652	0.0563093	2.37945	0.152077	FALSE
YDL141W	BPL1	chrIV_205915_G_A_9652	-0.00183711	0.748498	0.763843	FALSE
YDL142C	CRD1	chrIV_201495_C_T_9616	0.0587716	1.02022	0.64318	FALSE
YDL143W	CCT4	chrIV_201495_C_T_9616	-0.0137224	1.57426	0.392249	FALSE
YDL144C	YDL144C	chrIV_198656_T_C_9613	0.00366413	1.1716	0.575245	FALSE
YDL145C	COP1	chrIV_198656_T_C_9613	-0.0124072	2.16345	0.200393	FALSE
YDL146W	LDB17	chrIV_198656_T_C_9613	0.112381	1.73704	0.324583	FALSE
YDL147W	RPN5	chrIV_188307_T_C_9572	-0.0693052	5.36185	0.00280374	FALSE
YDL148C	NOP14	chrIV_188307_T_C_9572	-0.0720125	1.18644	0.569127	FALSE
YDL149W	ATG9	chrIV_188307_T_C_9572	0.0659738	0.451019	0.900075	FALSE
YDL150W	RPC53	chrIV_188307_T_C_9572	0.0244591	0.431042	0.906791	FALSE
YDL152W	YDL152W	chrIV_178930_G_A_9511	0.0958242	0.495341	0.879328	FALSE
YDL153C	SAS10	chrIV_178930_G_A_9511	-0.0804802	2.6436	0.105782	FALSE
YDL154W	MSH5	chrIV_178930_G_A_9511	0.0437587	0.718539	0.779064	FALSE
YDL155W	CLB3	chrIV_178930_G_A_9511	0.020502	0.936635	0.681774	FALSE
YDL157C	YDL157C	chrIV_174185_C_T_9480	-0.272613	44.2452	0	FALSE
YDL159W	STE7	chrIV_174185_C_T_9480	0.0049076	1.22308	0.554222	FALSE
YDL164C	CDC9	chrIV_166025_T_C_9456	0.0382733	0.862001	0.714719	FALSE
YDL165W	CDC36	chrIV_166025_T_C_9456	0.0379907	0.903191	0.696781	FALSE
YDL166C	FAP7	chrIV_166025_T_C_9456	-0.0396389	1.22962	0.551934	FALSE
YDL167C	NRP1	chrIV_160644_C_G_9436	0.0669819	1.27347	0.531105	FALSE
YDL168W	SFA1	chrIV_160644_C_G_9436	-0.325669	19.7463	0	FALSE
YDL171C	GLT1	chrIV_149240_T_C_9355	0.0139572	0.95071	0.677163	FALSE
YDL173W	PAR32	chrIV_149240_T_C_9355	-0.0787744	3.57658	0.0271115	FALSE
YDL174C	DLD1	chrIV_145132_C_T_9338	-0.0453364	2.5201	0.126198	FALSE
YDL175C	AIR2	chrIV_145132_C_T_9338	0.0295753	1.94019	0.262207	FALSE
YDL177C	YDL177C	chrIV_141006_G_A_9316	-0.153558	3.19927	0.045986	FALSE
YDL178W	DLD2	chrIV_141006_G_A_9316	-0.0962604	4.00334	0.0159378	FALSE
YDL181W	INH1	chrIV_135409_A_G_9282	0.12479	7.49651	0.000609756	FALSE
YDL182W	LYS20	chrIV_135409_A_G_9282	0.0931078	15.7095	0	FALSE
YDL184C	RPL41A	chrIV_129666_G_T_9257	0.00184058	0.174252	0.988129	FALSE
YDL185W	VMA1	chrIV_129666_G_T_9257	0.116668	14.2517	0	FALSE
YDL187C	YDL187C	chrIV_125401_A_T_9246	-0.553705	4.46282	0.00717789	FALSE
YDL188C	PPH22	chrIV_125401_A_T_9246	-0.00460854	0.33792	0.943617	FALSE
YDL189W	RBS1	chrIV_121939_T_A_9238	-0.0178247	2.70804	0.0958449	FALSE
YDL190C	UFD2	chrIV_121939_T_A_9238	0.109029	2.31468	0.163541	FALSE
YDL191W	RPL35A	chrIV_121939_T_A_9238	0.0233043	3.22135	0.0443624	FALSE
YDL192W	ARF1	chrIV_121939_T_A_9238	-0.0160168	1.78029	0.310557	FALSE
YDL193W	NUS1	chrIV_121939_T_A_9238	0.0830443	2.31591	0.16332	FALSE
YDL194W	SNF3	chrIV_104978_G_T_9130	-0.0837414	2.49932	0.13077	FALSE
YDL195W	SEC31	chrIV_104978_G_T_9130	0.0351049	0.658238	0.806116	FALSE
YDL197C	ASF2	chrIV_104978_G_T_9130	0.205859	9.51659	0.000609756	TRUE
YDL199C	YDL199C	chrIV_101118_G_T_9082	0.0616755	0.724119	0.776159	FALSE
YDL200C	MGT1	chrIV_101118_G_T_9082	-0.060479	1.10008	0.606047	FALSE
YDL201W	TRM8	chrIV_100317_A_C_9074	-0.00515729	0.189201	0.985589	FALSE
YDL202W	MRPL11	chrIV_100317_A_C_9074	-0.0221269	0.129549	0.992598	FALSE
YDL203C	ACK1	chrIV_94417_C_T_9024	-0.0441099	0.506246	0.874256	FALSE
YDL204W	RTN2	chrIV_94417_C_T_9024	0.0435075	0.388684	0.924509	FALSE
YDL205C	HEM3	chrIV_94417_C_T_9024	0.23592	3.68549	0.0231177	FALSE
YDL206W	YDL206W	chrIV_88505_T_C_8995	-0.025651	1.79242	0.306468	FALSE
YDL207W	GLE1	chrIV_88505_T_C_8995	-0.0436361	0.929494	0.684466	FALSE
YDL208W	NHP2	chrIV_88505_T_C_8995	-0.0156095	0.702031	0.786662	FALSE
YDL209C	CWC2	chrIV_86088_C_G_8980	-0.0219865	0.802043	0.738571	FALSE
YDL210W	UGA4	chrIV_86088_C_G_8980	-0.210214	1.33463	0.501154	FALSE
YDL212W	SHR3	chrIV_78644_T_A_8903	-0.00558725	1.19556	0.565414	FALSE
YDL213C	NOP6	chrIV_78644_T_A_8903	-0.0603644	2.5704	0.117595	FALSE
YDL214C	PRR2	chrIV_78644_T_A_8903	-0.0420827	1.96115	0.256309	FALSE
YDL215C	GDH2	chrIV_66946_C_T_8831	0.00948622	0.689601	0.792299	FALSE
YDL216C	RRI1	chrIV_66946_C_T_8831	-0.293934	4.99535	0.00335664	FALSE
YDL217C	TIM22	chrIV_66946_C_T_8831	0.58979	86.4118	0	TRUE
YDL220C	CDC13	chrIV_62811_A_G_8797	-0.0719202	0.661663	0.80459	FALSE
YDL222C	FMP45	chrIV_62811_A_G_8797	0.30258	2.66989	0.102746	FALSE
YDL223C	HBT1	chrIV_62811_A_G_8797	-0.494078	3.43064	0.0333465	FALSE
YDL224C	WHI4	chrIV_52930_T_C_8740	0.046105	0.509963	0.872518	FALSE
YDL225W	SHS1	chrIV_52930_T_C_8740	-0.0291723	0.425217	0.909439	FALSE
YDL226C	GCS1	chrIV_52930_T_C_8740	0.028811	2.2966	0.167759	FALSE
YDL227C	HO	chrIV_48046_A_G_8719	-0.283415	1.67395	0.353299	FALSE
YDL228C	YDL228C	chrIV_48046_A_G_8719	0.0224405	2.61564	0.110562	FALSE
YDL229W	SSB1	chrIV_48046_A_G_8719	-0.0176706	2.36341	0.154859	FALSE
YDL230W	PTP1	chrIV_48046_A_G_8719	0.0775065	0.591015	0.837366	FALSE
YDL231C	BRE4	chrIV_36578_C_T_8686	0.0806423	2.07704	0.221052	FALSE
YDL232W	OST4	chrIV_36578_C_T_8686	-0.0462905	2.23025	0.183374	FALSE
YDL233W	MFG1	chrIV_36578_C_T_8686	0.0111224	1.98129	0.249562	FALSE
YDL234C	GYP7	chrIV_34267_T_C_8684	0.0388204	0.765003	0.756226	FALSE
YDL235C	YPD1	chrIV_34267_T_C_8684	0.0391378	1.62097	0.375415	FALSE
YDL236W	PHO13	chrIV_34267_T_C_8684	-0.00126464	0.850417	0.720137	FALSE
YDL237W	AIM6	chrIV_34267_T_C_8684	-0.0407703	1.53378	0.40729	FALSE
YDL238C	GUD1	chrIV_34267_T_C_8684	-0.0444552	1.96262	0.255758	FALSE
YDL239C	ADY3	chrIV_34267_T_C_8684	-0.272625	2.53215	0.124162	FALSE
YDL240W	LRG1	chrIV_34267_T_C_8684	0.0432799	1.18258	0.57056	FALSE
YDL241W	YDL241W	chrIV_34267_T_C_8684	0.00545682	1.87387	0.283771	FALSE
YDL243C	AAD4	chrIV_3494_C_A_8543	-0.0353746	0.583249	0.839408	FALSE
YDL248W	COS7	chrIV_3494_C_A_8543	-0.144468	1.35741	0.488421	FALSE
YDR001C	NTH1	chrIV_450610_T_C_11025	-0.0544368	2.05849	0.224551	FALSE
YDR002W	YRB1	chrIV_450610_T_C_11025	0.0408258	5.69382	0.00201681	FALSE
YDR003W	RCR2	chrIV_450610_T_C_11025	0.0201749	1.38275	0.476873	FALSE
YDR003W-A	YDR003W-A	chrIV_450610_T_C_11025	-0.00975371	1.40729	0.464555	FALSE
YDR004W	RAD57	chrIV_450610_T_C_11025	0.00337945	0.527028	0.866236	FALSE
YDR005C	MAF1	chrIV_450610_T_C_11025	0.10539	3.08019	0.0536381	FALSE
YDR006C	SOK1	chrIV_465495_G_A_11076	-0.0852457	3.68422	0.0231226	FALSE
YDR007W	TRP1	chrIV_465495_G_A_11076	-0.00592931	0.479571	0.886259	FALSE
YDR009W	GAL3	chrIV_465495_G_A_11076	-0.161326	2.88715	0.0742336	FALSE
YDR011W	SNQ2	chrIV_470435_A_G_11094	0.0598723	1.75185	0.319132	FALSE
YDR012W	RPL4B	chrIV_470435_A_G_11094	-0.0296586	4.62545	0.0058522	FALSE
YDR013W	PSF1	chrIV_470435_A_G_11094	0.00788217	0.994406	0.657293	FALSE
YDR014W	RAD61	chrIV_478582_G_A_11140	-0.086868	0.952754	0.676504	FALSE
YDR016C	DAD1	chrIV_478582_G_A_11140	0.0209003	0.846663	0.722025	FALSE
YDR019C	GCV1	chrIV_484429_C_T_11169	-0.0292482	1.30919	0.513729	FALSE
YDR020C	DAS2	chrIV_484429_C_T_11169	0.0298662	0.565657	0.847219	FALSE
YDR021W	FAL1	chrIV_488180_T_A_11180	-0.0228319	1.80178	0.303389	FALSE
YDR022C	ATG31	chrIV_488180_T_A_11180	-0.0478553	1.58895	0.387232	FALSE
YDR023W	SES1	chrIV_490530_C_T_11202	0.198388	59.3507	0	FALSE
YDR024W	FYV1	chrIV_490530_C_T_11202	0.0275109	0.276307	0.963045	FALSE
YDR025W	RPS11A	chrIV_490530_C_T_11202	0.00150393	1.18462	0.569805	FALSE
YDR026C	NSI1	chrIV_490530_C_T_11202	-0.0412419	1.58488	0.388338	FALSE
YDR027C	VPS54	chrIV_490530_C_T_11202	-0.0639172	1.35806	0.488115	FALSE
YDR028C	REG1	chrIV_507634_C_G_11287	-0.0524557	0.909888	0.694537	FALSE
YDR030C	RAD28	chrIV_507634_C_G_11287	0.156424	3.59616	0.026328	FALSE
YDR031W	MIX14	chrIV_507634_C_G_11287	0.0212934	0.146656	0.990983	FALSE
YDR032C	PST2	chrIV_507634_C_G_11287	0.028171	2.52359	0.125559	FALSE
YDR035W	ARO3	chrIV_524392_A_G_11618	-0.25978	17.7679	0	TRUE
YDR036C	EHD3	chrIV_524392_A_G_11618	-0.573533	24.7514	0	TRUE
YDR037W	KRS1	chrIV_525412_G_A_11698	-0.586186	339.646	0	TRUE
YDR038C	ENA5	chrIV_525412_G_A_11698	-1.68404	82.839	0	FALSE
YDR051C	DET1	chrIV_557113_G_A_11943	0.0468475	1.76749	0.314706	FALSE
YDR052C	DBF4	chrIV_557113_G_A_11943	0.0797721	2.8423	0.0782634	FALSE
YDR055W	PST1	chrIV_564904_T_C_11958	-0.00369513	0.0990179	0.996833	FALSE
YDR056C	EMC10	chrIV_564904_T_C_11958	0.039335	2.18211	0.195803	FALSE
YDR057W	YOS9	chrIV_567474_T_G_11969	-0.0522437	0.527823	0.86597	FALSE
YDR058C	TGL2	chrIV_567474_T_G_11969	0.0669739	0.921485	0.689272	FALSE
YDR059C	UBC5	chrIV_567474_T_G_11969	-0.0393501	2.56125	0.118456	FALSE
YDR060W	MAK21	chrIV_573826_C_T_11990	0.164982	12.6249	0	FALSE
YDR061W	YDR061W	chrIV_573826_C_T_11990	0.139532	2.478	0.134648	FALSE
YDR062W	LCB2	chrIV_576524_G_T_12009	0.244251	33.4273	0	FALSE
YDR063W	AIM7	chrIV_576524_G_T_12009	-0.113003	7.39387	0.000609756	FALSE
YDR064W	RPS13	chrIV_581581_C_A_12035	0.00487694	1.58061	0.389498	FALSE
YDR065W	RRG1	chrIV_581581_C_A_12035	0.068399	0.750131	0.763111	FALSE
YDR066C	RTR2	chrIV_581581_C_A_12035	-0.0880078	1.86154	0.286922	FALSE
YDR068W	DOS2	chrIV_584849_A_G_12045	0.0534309	1.2762	0.530219	FALSE
YDR069C	DOA4	chrIV_584849_A_G_12045	0.156829	2.13502	0.207759	FALSE
YDR073W	SNF11	chrIV_593121_G_T_12097	-0.257312	16.9747	0	FALSE
YDR074W	TPS2	chrIV_593121_G_T_12097	-0.0529614	3.15459	0.047893	FALSE
YDR075W	PPH3	chrIV_600978_A_T_12175	-0.00934589	1.77586	0.311994	FALSE
YDR076W	RAD55	chrIV_600978_A_T_12175	-0.0802833	1.31009	0.513152	FALSE
YDR077W	SED1	chrIV_600978_A_T_12175	0.40147	64.7309	0	FALSE
YDR079C-A	TFB5	chrIV_603439_A_G_12187	-0.144968	8.27371	0.000609756	FALSE
YDR079W	PET100	chrIV_603439_A_G_12187	-0.0403633	4.2388	0.0114695	TRUE
YDR080W	VPS41	chrIV_603439_A_G_12187	-0.0395365	0.544207	0.857506	FALSE
YDR082W	STN1	chrIV_612085_A_G_12251	0.11792	3.33228	0.039595	FALSE
YDR083W	RRP8	chrIV_612085_A_G_12251	-0.02375	2.75922	0.0882602	FALSE
YDR087C	RRP1	chrIV_618461_C_T_12313	-0.0960026	3.48543	0.031442	FALSE
YDR088C	SLU7	chrIV_618461_C_T_12313	-0.0618636	0.826678	0.729638	FALSE
YDR096W	GIS1	chrIV_644622_A_G_12492	0.0277591	2.43381	0.142514	FALSE
YDR097C	MSH6	chrIV_644622_A_G_12492	0.1355	4.04214	0.0154882	FALSE
YDR098C	GRX3	chrIV_644622_A_G_12492	-0.29855	67.1922	0	FALSE
YDR099W	BMH2	chrIV_653143_C_T_12505	0.0218633	1.98059	0.249844	FALSE
YDR100W	TVP15	chrIV_653143_C_T_12505	0.00319729	0.632245	0.817028	FALSE
YDR101C	ARX1	chrIV_653143_C_T_12505	-0.0127636	0.353052	0.938722	FALSE
YDR103W	STE5	chrIV_664947_A_G_12536	-0.0666977	0.658021	0.806197	FALSE
YDR104C	SPO71	chrIV_664947_A_G_12536	0.135814	2.43519	0.142263	FALSE
YDR105C	TMS1	chrIV_664947_A_G_12536	0.0239613	1.21694	0.556447	FALSE
YDR106W	ARP10	chrIV_664947_A_G_12536	-0.0931663	0.925305	0.68698	FALSE
YDR107C	TMN2	chrIV_664947_A_G_12536	-0.0949214	2.6103	0.110949	FALSE
YDR108W	TRS85	chrIV_664947_A_G_12536	-0.00746714	0.418162	0.912645	FALSE
YDR109C	YDR109C	chrIV_681939_G_T_12588	-0.274512	9.21665	0.000609756	FALSE
YDR110W	FOB1	chrIV_681939_G_T_12588	-0.0517067	2.02949	0.234131	FALSE
YDR111C	ALT2	chrIV_681939_G_T_12588	-0.199045	5.22307	0.00301205	FALSE
YDR113C	PDS1	chrIV_681939_G_T_12588	-0.0448981	0.789915	0.745576	FALSE
YDR115W	MRX14	chrIV_681939_G_T_12588	0.023457	0.339497	0.943226	FALSE
YDR116C	MRPL1	chrIV_681939_G_T_12588	-0.0564393	0.761194	0.757711	FALSE
YDR117C	TMA64	chrIV_681939_G_T_12588	0.0511621	0.546819	0.855951	FALSE
YDR118W	APC4	chrIV_681939_G_T_12588	0.181068	2.01278	0.239761	FALSE
YDR119W	VBA4	chrIV_692002_A_G_12626	0.0647512	3.32385	0.0398888	FALSE
YDR120C	TRM1	chrIV_692002_A_G_12626	-0.0236599	0.472716	0.889092	FALSE
YDR121W	DPB4	chrIV_692002_A_G_12626	-0.115388	3.61907	0.0255766	FALSE
YDR124W	YDR124W	chrIV_699436_A_C_12677	-0.27877	2.96995	0.0644813	FALSE
YDR125C	ECM18	chrIV_699436_A_C_12677	-0.0530942	2.88222	0.074549	FALSE
YDR126W	SWF1	chrIV_699436_A_C_12677	0.33239	4.27272	0.0102475	FALSE
YDR127W	ARO1	chrIV_713074_G_T_12728	0.00584757	0.690911	0.791762	FALSE
YDR128W	MTC5	chrIV_713074_G_T_12728	-0.0184546	0.431368	0.906668	FALSE
YDR129C	SAC6	chrIV_713505_G_A_12730	-0.0275717	0.821756	0.732137	FALSE
YDR130C	FIN1	chrIV_713505_G_A_12730	-0.237114	5.44339	0.00253165	FALSE
YDR131C	YDR131C	chrIV_720321_T_C_12786	-0.081343	0.561445	0.848959	FALSE
YDR132C	YDR132C	chrIV_720321_T_C_12786	-0.00187297	0.755877	0.760238	FALSE
YDR133C	YDR133C	chrIV_720321_T_C_12786	-0.0671397	50.8487	0	TRUE
YDR135C	YCF1	chrIV_720321_T_C_12786	0.0647341	1.43433	0.451342	FALSE
YDR137W	RGP1	chrIV_730734_A_G_12840	0.162847	3.29561	0.0403391	FALSE
YDR138W	HPR1	chrIV_730734_A_G_12840	-0.0724561	0.283465	0.96088	FALSE
YDR139C	RUB1	chrIV_733784_T_C_12852	0.108067	3.82639	0.0199653	FALSE
YDR140W	MTQ2	chrIV_733784_T_C_12852	-0.0248884	0.637219	0.815399	FALSE
YDR141C	DOP1	chrIV_733784_T_C_12852	0.0176883	0.763451	0.756831	FALSE
YDR142C	PEX7	chrIV_741415_A_G_12858	-0.0669078	1.13078	0.592142	FALSE
YDR143C	SAN1	chrIV_741415_A_G_12858	0.0134279	0.568577	0.846012	FALSE
YDR146C	SWI5	chrIV_749051_C_T_12893	-0.0108542	1.55873	0.398509	FALSE
YDR147W	EKI1	chrIV_749051_C_T_12893	0.0553749	1.12811	0.593625	FALSE
YDR148C	KGD2	chrIV_749051_C_T_12893	-0.0955735	2.41586	0.146055	FALSE
YDR150W	NUM1	chrIV_766110_A_G_12927	-0.0165711	1.53396	0.407204	FALSE
YDR151C	CTH1	chrIV_766110_A_G_12927	-0.00296176	0.520196	0.868519	FALSE
YDR152W	GIR2	chrIV_766110_A_G_12927	0.0261865	1.41147	0.462226	FALSE
YDR153C	ENT5	chrIV_767334_C_T_12931	0.0430385	1.29222	0.521892	FALSE
YDR154C	YDR154C	chrIV_767334_C_T_12931	0.00844573	1.05125	0.629391	FALSE
YDR155C	CPR1	chrIV_767334_C_T_12931	0.0483742	1.99738	0.243575	FALSE
YDR156W	RPA14	chrIV_770336_G_A_12944	-0.000748332	0.758897	0.758728	FALSE
YDR157W	YDR157W	chrIV_770336_G_A_12944	-0.333247	5.47524	0.00253165	FALSE
YDR158W	HOM2	chrIV_770336_G_A_12944	0.0556233	5.68589	0.00201681	FALSE
YDR159W	SAC3	chrIV_770336_G_A_12944	0.0898167	2.09776	0.216933	FALSE
YDR160W	SSY1	chrIV_780200_T_A_12968	0.0104348	1.62744	0.37296	FALSE
YDR161W	ACL4	chrIV_780200_T_A_12968	-0.0723689	1.86479	0.28606	FALSE
YDR162C	NBP2	chrIV_780200_T_A_12968	0.0929348	2.09602	0.217111	FALSE
YDR163W	CWC15	chrIV_781779_A_T_12971	0.180887	5.45992	0.00253165	FALSE
YDR164C	SEC1	chrIV_781779_A_T_12971	0.158126	1.23133	0.551228	FALSE
YDR167W	TAF10	chrIV_790950_A_G_12981	-0.0103437	2.68598	0.0989735	FALSE
YDR168W	CDC37	chrIV_790950_A_G_12981	-0.0220505	3.32707	0.0397959	FALSE
YDR169C	STB3	chrIV_790950_A_G_12981	0.0161166	1.0975	0.607508	FALSE
YDR171W	HSP42	chrIV_807529_A_G_13093	-0.0698079	1.11192	0.602225	FALSE
YDR172W	SUP35	chrIV_807529_A_G_13093	0.0793205	3.75447	0.0211278	FALSE
YDR173C	ARG82	chrIV_812667_C_T_13106	-0.0158771	1.89626	0.27517	FALSE
YDR174W	HMO1	chrIV_812667_C_T_13106	-0.0283033	1.50808	0.418758	FALSE
YDR175C	RSM24	chrIV_812667_C_T_13106	-0.00594868	0.958528	0.674645	FALSE
YDR177W	UBC1	chrIV_818791_T_C_13128	0.0595916	2.9198	0.0703906	FALSE
YDR178W	SDH4	chrIV_818791_T_C_13128	-0.038889	1.83581	0.293586	FALSE
YDR179C	CSN9	chrIV_818791_T_C_13128	-0.127759	3.20154	0.0458326	FALSE
YDR179W-A	NVJ3	chrIV_818791_T_C_13128	0.230256	4.20199	0.0119115	FALSE
YDR180W	SCC2	chrIV_825304_T_C_13168	0.000717993	0.516351	0.870014	FALSE
YDR181C	SAS4	chrIV_825304_T_C_13168	0.0164684	0.151422	0.990384	FALSE
YDR182W	CDC1	chrIV_825304_T_C_13168	-0.0265577	0.996072	0.656273	FALSE
YDR183C-A	YDR183C-A	chrIV_835091_A_G_13210	0.00118098	0.940608	0.68037	FALSE
YDR183W	PLP1	chrIV_825304_T_C_13168	-0.0430833	1.21134	0.558545	FALSE
YDR184C	ATC1	chrIV_835091_A_G_13210	-0.122423	0.798869	0.739902	FALSE
YDR185C	UPS3	chrIV_835091_A_G_13210	-0.0384594	0.911406	0.69389	FALSE
YDR186C	SND1	chrIV_835091_A_G_13210	0.057656	1.87621	0.283223	FALSE
YDR190C	RVB1	chrIV_841074_A_G_13228	-0.00988755	1.33935	0.498235	FALSE
YDR191W	HST4	chrIV_841074_A_G_13228	0.299598	3.13916	0.0486878	FALSE
YDR192C	NUP42	chrIV_846915_C_T_13254	0.563538	20.3314	0	FALSE
YDR194C	MSS116	chrIV_846915_C_T_13254	0.133507	5.7481	0.00201681	FALSE
YDR195W	REF2	chrIV_850450_T_C_13260	-0.000931632	1.48623	0.426781	FALSE
YDR196C	CAB5	chrIV_850450_T_C_13260	0.0215587	0.828406	0.728761	FALSE
YDR197W	CBS2	chrIV_852474_G_A_13283	0.0438866	0.769978	0.754286	FALSE
YDR198C	RKM2	chrIV_852474_G_A_13283	0.0563664	0.586872	0.838543	FALSE
YDR201W	SPC19	chrIV_858356_C_T_13317	-0.055755	1.85523	0.288734	FALSE
YDR202C	RAV2	chrIV_858356_C_T_13317	0.0836309	2.85267	0.0776751	FALSE
YDR204W	COQ4	chrIV_858356_C_T_13317	-0.0133286	0.626303	0.819196	FALSE
YDR205W	MSC2	chrIV_861707_G_A_13335	0.102812	1.5845	0.388439	FALSE
YDR206W	EBS1	chrIV_861707_G_A_13335	-0.0622666	0.978625	0.665443	FALSE
YDR207C	UME6	chrIV_861707_G_A_13335	0.10355	1.32148	0.507875	FALSE
YDR211W	GCD6	chrIV_885407_G_A_13418	-0.0765582	3.55049	0.0280138	FALSE
YDR212W	TCP1	chrIV_885407_G_A_13418	-0.0621972	3.44257	0.0328799	FALSE
YDR213W	UPC2	chrIV_892057_C_T_13457	-0.0875599	2.19054	0.19294	FALSE
YDR214W	AHA1	chrIV_892057_C_T_13457	0.0358094	1.84281	0.292206	FALSE
YDR216W	ADR1	chrIV_892057_C_T_13457	0.406762	2.73375	0.0913815	FALSE
YDR217C	RAD9	chrIV_909656_A_G_13563	-0.0432448	0.546662	0.856045	FALSE
YDR219C	MFB1	chrIV_909656_A_G_13563	-0.0830744	1.46618	0.436165	FALSE
YDR221W	GTB1	chrIV_909656_A_G_13563	-0.00236742	0.348603	0.940363	FALSE
YDR222W	YDR222W	chrIV_910905_G_A_13565	-0.161205	2.94364	0.0667612	FALSE
YDR223W	CRF1	chrIV_910905_G_A_13565	0.0889478	0.796306	0.741533	FALSE
YDR224C	HTB1	chrIV_910905_G_A_13565	-0.00486386	0.555071	0.851775	FALSE
YDR225W	HTA1	chrIV_910905_G_A_13565	0.0269262	1.64647	0.365272	FALSE
YDR226W	ADK1	chrIV_910905_G_A_13565	-0.0201826	3.76149	0.0208462	FALSE
YDR227W	SIR4	chrIV_925956_G_A_13683	-0.00796189	0.803787	0.73805	FALSE
YDR228C	PCF11	chrIV_925956_G_A_13683	-0.0513663	0.881377	0.70653	FALSE
YDR229W	IVY1	chrIV_925956_G_A_13683	-0.071026	1.98997	0.246075	FALSE
YDR232W	HEM1	chrIV_929473_A_G_13708	-0.0278676	0.997103	0.655641	FALSE
YDR233C	RTN1	chrIV_929473_A_G_13708	-0.0271152	3.03702	0.0575896	FALSE
YDR235W	PRP42	chrIV_935163_A_G_13729	-0.0748824	1.40985	0.463055	FALSE
YDR236C	FMN1	chrIV_935163_A_G_13729	0.239197	11.6576	0	FALSE
YDR237W	MRPL7	chrIV_937752_G_C_13740	0.00369169	0.906961	0.695518	FALSE
YDR238C	SEC26	chrIV_937752_G_C_13740	0.0433448	1.30092	0.519186	FALSE
YDR240C	SNU56	chrIV_946452_C_T_13777	-0.0763136	1.36164	0.486527	FALSE
YDR242W	AMD2	chrIV_946452_C_T_13777	-0.357459	4.52105	0.00680142	FALSE
YDR243C	PRP28	chrIV_946452_C_T_13777	-0.239859	4.44071	0.00724095	FALSE
YDR247W	VHS1	chrIV_958608_G_A_13869	0.0534383	1.55145	0.400247	FALSE
YDR248C	YDR248C	chrIV_958608_G_A_13869	-0.0395581	1.62851	0.372554	FALSE
YDR249C	YDR249C	chrIV_958608_G_A_13869	-0.00598066	1.46856	0.435083	FALSE
YDR251W	PAM1	chrIV_963910_C_T_13889	-0.0372365	1.70317	0.340982	FALSE
YDR252W	BTT1	chrIV_963910_C_T_13889	-0.0349752	0.224771	0.978559	FALSE
YDR253C	MET32	chrIV_963910_C_T_13889	0.135563	6.68351	0.000821355	FALSE
YDR254W	CHL4	chrIV_963910_C_T_13889	0.0700499	1.11932	0.598889	FALSE
YDR255C	RMD5	chrIV_963910_C_T_13889	-0.0362225	1.37516	0.480385	FALSE
YDR257C	RKM4	chrIV_973128_G_A_13903	0.00894308	0.865371	0.71284	FALSE
YDR258C	HSP78	chrIV_973128_G_A_13903	-0.0572131	1.54221	0.403415	FALSE
YDR259C	YAP6	chrIV_973128_G_A_13903	-0.021335	1.12531	0.595338	FALSE
YDR260C	SWM1	chrIV_973128_G_A_13903	-0.144221	3.30417	0.040107	FALSE
YDR261C	EXG2	chrIV_973128_G_A_13903	-0.0166711	0.975043	0.667099	FALSE
YDR262W	YDR262W	chrIV_1011237_G_A_13995	-0.0229108	0.73	0.772908	FALSE
YDR263C	DIN7	chrIV_1011237_G_A_13995	-0.00834106	0.587297	0.838442	FALSE
YDR264C	AKR1	chrIV_1011237_G_A_13995	0.00183784	1.51433	0.416564	FALSE
YDR265W	PEX10	chrIV_1011237_G_A_13995	0.0553717	0.70637	0.784525	FALSE
YDR266C	HEL2	chrIV_1011237_G_A_13995	0.0170478	1.01919	0.64368	FALSE
YDR267C	CIA1	chrIV_1011237_G_A_13995	-0.013088	0.429445	0.907445	FALSE
YDR268W	MSW1	chrIV_1011237_G_A_13995	-0.0877712	0.960163	0.674093	FALSE
YDR270W	CCC2	chrIV_1011237_G_A_13995	-0.0194088	1.44952	0.444081	FALSE
YDR272W	GLO2	chrIV_1011237_G_A_13995	-0.0576173	2.27721	0.172504	FALSE
YDR273W	DON1	chrIV_1011237_G_A_13995	1.22366	112.8	0	FALSE
YDR275W	BSC2	chrIV_1013236_A_T_14006	-0.0201024	1.1093	0.6033	FALSE
YDR276C	PMP3	chrIV_1013236_A_T_14006	0.0514802	12.4945	0	FALSE
YDR277C	MTH1	chrIV_1014066_G_A_14013	-0.0691153	0.503324	0.875622	FALSE
YDR278C	YDR278C	chrIV_1014066_G_A_14013	-0.853162	15.966	0	FALSE
YDR279W	RNH202	chrIV_1014066_G_A_14013	-0.0474174	1.7585	0.3175	FALSE
YDR280W	RRP45	chrIV_1014066_G_A_14013	0.0326666	0.926487	0.686271	FALSE
YDR281C	PHM6	chrIV_1014066_G_A_14013	0.365333	8.27392	0.000609756	FALSE
YDR282C	MRX10	chrIV_1030683_A_G_14113	0.00531312	0.317337	0.950131	FALSE
YDR283C	GCN2	chrIV_1030683_A_G_14113	-0.167936	5.83942	0.00141343	FALSE
YDR284C	DPP1	chrIV_1030683_A_G_14113	-0.09734	4.30402	0.00993939	FALSE
YDR285W	ZIP1	chrIV_1035309_A_G_14148	0.0366978	0.897368	0.69908	FALSE
YDR286C	YDR286C	chrIV_1035309_A_G_14148	0.128984	3.63947	0.0251075	FALSE
YDR288W	NSE3	chrIV_1038058_T_C_14178	-0.230369	9.73391	0.000609756	FALSE
YDR289C	RTT103	chrIV_1038058_T_C_14178	-0.0483897	1.24716	0.54447	FALSE
YDR291W	HRQ1	chrIV_1038058_T_C_14178	-0.0381512	1.62609	0.373471	FALSE
YDR292C	SRP101	chrIV_1038058_T_C_14178	0.0803082	1.91857	0.267583	FALSE
YDR295C	HDA2	chrIV_1055893_A_G_14293	-0.0186776	1.5086	0.418541	FALSE
YDR296W	MHR1	chrIV_1055893_A_G_14293	-0.086501	2.25591	0.177144	FALSE
YDR299W	BFR2	chrIV_1061501_C_A_14352	-0.00195976	0.232115	0.977016	FALSE
YDR300C	PRO1	chrIV_1061501_C_A_14352	-0.0168696	1.38057	0.477622	FALSE
YDR301W	CFT1	chrIV_1068192_A_G_14388	0.0502615	0.865617	0.712702	FALSE
YDR302W	GPI11	chrIV_1068192_A_G_14388	-0.106136	4.15766	0.0126359	FALSE
YDR303C	RSC3	chrIV_1068192_A_G_14388	-0.0554656	0.850445	0.720125	FALSE
YDR304C	CPR5	chrIV_1072815_T_C_14405	0.0162637	1.52031	0.414566	FALSE
YDR305C	HNT2	chrIV_1072815_T_C_14405	0.202997	6.83332	0.000821355	FALSE
YDR306C	YDR306C	chrIV_1072815_T_C_14405	0.121559	1.74857	0.320085	FALSE
YDR307W	PMT7	chrIV_1078767_T_C_14460	0.186059	3.6261	0.0253641	FALSE
YDR308C	SRB7	chrIV_1078767_T_C_14460	-0.0299603	0.788089	0.746197	FALSE
YDR310C	SUM1	chrIV_1081043_G_C_14468	0.0635741	1.31583	0.510481	FALSE
YDR311W	TFB1	chrIV_1081043_G_C_14468	0.0419099	0.825843	0.730062	FALSE
YDR312W	SSF2	chrIV_1091512_C_T_14551	0.167141	5.2941	0.00280374	FALSE
YDR313C	PIB1	chrIV_1091512_C_T_14551	0.118276	2.87493	0.0749647	FALSE
YDR314C	RAD34	chrIV_1091512_C_T_14551	0.0247713	1.89024	0.277111	FALSE
YDR315C	IPK1	chrIV_1091512_C_T_14551	-0.233601	6.12341	0.00129931	FALSE
YDR316W	OMS1	chrIV_1091512_C_T_14551	-0.103721	2.94681	0.0664769	FALSE
YDR317W	HIM1	chrIV_1107470_C_T_14627	-0.0307088	0.629249	0.818055	FALSE
YDR318W	MCM21	chrIV_1107470_C_T_14627	-0.0235191	1.67483	0.353089	FALSE
YDR319C	YFT2	chrIV_1107470_C_T_14627	0.13151	5.66393	0.00201681	FALSE
YDR320C	SWA2	chrIV_1107470_C_T_14627	0.0823731	3.22023	0.0444626	FALSE
YDR322C-A	TIM11	chrIV_1111575_C_T_14657	0.0718745	6.78334	0.000821355	FALSE
YDR322W	MRPL35	chrIV_1111575_C_T_14657	0.0365504	0.580502	0.840064	FALSE
YDR323C	PEP7	chrIV_1113053_T_C_14664	-0.0222095	0.303937	0.954072	FALSE
YDR324C	UTP4	chrIV_1113053_T_C_14664	0.00436952	0.708226	0.783611	FALSE
YDR325W	YCG1	chrIV_1113053_T_C_14664	-0.187963	4.75199	0.00459459	FALSE
YDR326C	YSP2	chrIV_1125098_A_T_14727	-0.0669857	1.61421	0.377576	FALSE
YDR328C	SKP1	chrIV_1125098_A_T_14727	-0.0342808	1.30241	0.5182	FALSE
YDR330W	UBX5	chrIV_1129373_A_G_14766	0.039366	2.72685	0.0924466	FALSE
YDR331W	GPI8	chrIV_1129373_A_G_14766	-0.0294991	0.771341	0.753564	FALSE
YDR332W	IRC3	chrIV_1129373_A_G_14766	-0.126834	1.436	0.450775	FALSE
YDR333C	RQC1	chrIV_1129373_A_G_14766	0.0451821	0.782358	0.748149	FALSE
YDR334W	SWR1	chrIV_1129373_A_G_14766	-0.0658504	2.43987	0.141408	FALSE
YDR335W	MSN5	chrIV_1149909_A_T_14865	0.105557	3.92955	0.0187097	FALSE
YDR336W	MRX8	chrIV_1149909_A_T_14865	0.0198966	0.8944	0.700466	FALSE
YDR337W	MRPS28	chrIV_1149909_A_T_14865	0.0115947	0.914511	0.692543	FALSE
YDR338C	YDR338C	chrIV_1149909_A_T_14865	0.123268	2.90784	0.0714258	FALSE
YDR339C	FCF1	chrIV_1149909_A_T_14865	-0.0605155	3.04761	0.0569535	FALSE
YDR340W	YDR340W	chrIV_1149909_A_T_14865	-0.187857	2.44362	0.140555	FALSE
YDR341C	YDR341C	chrIV_1149909_A_T_14865	0.00197392	1.349	0.492527	FALSE
YDR342C	HXT7	chrIV_1149909_A_T_14865	0.191464	20.4381	0	FALSE
YDR343C	HXT6	chrIV_1166875_T_C_15063	0.128422	6.19891	0.000849336	FALSE
YDR345C	HXT3	chrIV_1166875_T_C_15063	0.0238492	1.27242	0.531448	FALSE
YDR354W	TRP4	chrIV_1186274_G_A_15272	0.0477646	2.99994	0.0606978	FALSE
YDR356W	SPC110	chrIV_1186274_G_A_15272	0.00655816	0.333893	0.944615	FALSE
YDR358W	GGA1	chrIV_1191917_G_A_15306	0.377742	25.1775	0	FALSE
YDR359C	EAF1	chrIV_1191917_G_A_15306	-0.0623654	1.19219	0.566861	FALSE
YDR361C	BCP1	chrIV_1195418_A_G_15331	-0.00102371	0.193576	0.985203	FALSE
YDR362C	TFC6	chrIV_1195418_A_G_15331	-0.174996	4.89	0.00357143	FALSE
YDR363W	ESC2	chrIV_1195418_A_G_15331	-0.125442	1.75406	0.31859	FALSE
YDR363W-A	SEM1	chrIV_1205646_G_C_15395	0.0392375	2.96847	0.0646721	FALSE
YDR364C	CDC40	chrIV_1205646_G_C_15395	0.0137272	1.70833	0.338231	FALSE
YDR365C	ESF1	chrIV_1205646_G_C_15395	-0.0261167	1.19287	0.566571	FALSE
YDR366C	YDR366C	chrIV_1217229_T_C_15445	-0.00510993	1.39572	0.47121	FALSE
YDR367W	KEI1	chrIV_1217229_T_C_15445	0.0021635	1.22781	0.552568	FALSE
YDR368W	YPR1	chrIV_1217229_T_C_15445	0.00913891	0.513751	0.871032	FALSE
YDR369C	XRS2	chrIV_1217229_T_C_15445	-0.0775661	1.102	0.605476	FALSE
YDR370C	DXO1	chrIV_1218445_A_G_15452	-0.0673832	2.16772	0.199463	FALSE
YDR371W	CTS2	chrIV_1218445_A_G_15452	-0.139524	2.42381	0.14433	FALSE
YDR372C	VPS74	chrIV_1218445_A_G_15452	0.030476	1.51346	0.416843	FALSE
YDR373W	FRQ1	chrIV_1218445_A_G_15452	-0.00114003	0.558658	0.85016	FALSE
YDR374W-A	WIP1	chrIV_1228063_C_T_15499	-0.249625	12.2611	0	FALSE
YDR375C	BCS1	chrIV_1228063_C_T_15499	-0.0123066	2.18747	0.193928	FALSE
YDR376W	ARH1	chrIV_1228063_C_T_15499	0.147367	3.36318	0.036946	FALSE
YDR381C-A	YDR381C-A	chrIV_1238292_A_G_15570	-0.317518	27.3133	0	FALSE
YDR381W	YRA1	chrIV_1238292_A_G_15570	0.0128548	0.840332	0.72525	FALSE
YDR382W	RPP2B	chrIV_1239990_T_A_15578	5.77443e-05	0.213458	0.981695	FALSE
YDR383C	NKP1	chrIV_1239990_T_A_15578	0.0202956	0.588953	0.838046	FALSE
YDR385W	EFT2	chrIV_1245458_C_T_15604	-0.00316913	1.64483	0.366021	FALSE
YDR386W	MUS81	chrIV_1245458_C_T_15604	0.0510401	0.722862	0.776853	FALSE
YDR387C	CIN10	chrIV_1245458_C_T_15604	-0.120888	2.03259	0.23303	FALSE
YDR388W	RVS167	chrIV_1253172_C_A_15641	-0.0263594	1.50194	0.421335	FALSE
YDR389W	SAC7	chrIV_1253172_C_A_15641	-0.0852527	2.35929	0.155504	FALSE
YDR392W	SPT3	chrIV_1261009_T_C_15678	0.0853626	1.67091	0.354015	FALSE
YDR393W	SHE9	chrIV_1261009_T_C_15678	0.0170489	1.48482	0.427344	FALSE
YDR394W	RPT3	chrIV_1261009_T_C_15678	0.116163	6.84086	0.000821355	FALSE
YDR397C	NCB2	chrIV_1267782_T_A_15691	0.0298732	1.2907	0.522302	FALSE
YDR398W	UTP5	chrIV_1267782_T_A_15691	-0.0227163	0.230895	0.977333	FALSE
YDR399W	HPT1	chrIV_1269345_A_G_15695	-0.00921227	1.85977	0.287398	FALSE
YDR400W	URH1	chrIV_1269345_A_G_15695	-0.0217727	1.30721	0.515037	FALSE
YDR404C	RPB7	chrIV_1276486_A_G_15725	-0.0367351	1.18784	0.568608	FALSE
YDR405W	MRP20	chrIV_1276486_A_G_15725	-0.00431282	0.592564	0.836709	FALSE
YDR406W	PDR15	chrIV_1285941_G_A_15754	-0.00596033	0.605172	0.831105	FALSE
YDR407C	TRS120	chrIV_1285941_G_A_15754	-0.0118724	0.622271	0.820759	FALSE
YDR409W	SIZ1	chrIV_1293287_T_C_15772	-0.0816651	0.768394	0.754904	FALSE
YDR410C	STE14	chrIV_1293287_T_C_15772	-0.00863209	2.37577	0.152761	FALSE
YDR411C	DFM1	chrIV_1293287_T_C_15772	-0.0797443	1.84572	0.291425	FALSE
YDR412W	RRP17	chrIV_1295438_T_C_15775	0.0356652	0.641748	0.813567	FALSE
YDR414C	ERD1	chrIV_1295438_T_C_15775	-0.215397	4.61504	0.00598179	FALSE
YDR416W	SYF1	chrIV_1300456_G_A_15795	0.0512472	1.50189	0.421356	FALSE
YDR418W	RPL12B	chrIV_1300456_G_A_15795	0.0028725	0.748047	0.764044	FALSE
YDR419W	RAD30	chrIV_1300456_G_A_15795	0.261737	1.75433	0.318523	FALSE
YDR420W	HKR1	chrIV_1300456_G_A_15795	-0.0668787	2.77217	0.0857711	FALSE
YDR421W	ARO80	chrIV_1319513_G_A_15858	0.213904	2.49038	0.132333	FALSE
YDR422C	SIP1	chrIV_1319513_G_A_15858	-0.0155253	1.13824	0.588997	FALSE
YDR423C	CAD1	chrIV_1319513_G_A_15858	-0.868224	89.7939	0	FALSE
YDR424C	DYN2	chrIV_1319513_G_A_15858	0.17162	12.1208	0	FALSE
YDR427W	RPN9	chrIV_1323104_T_C_15866	0.0564305	2.09585	0.217128	FALSE
YDR428C	BNA7	chrIV_1323104_T_C_15866	0.0357107	1.48694	0.426499	FALSE
YDR429C	TIF35	chrIV_1323104_T_C_15866	-0.0265039	1.03322	0.63782	FALSE
YDR430C	CYM1	chrIV_1323104_T_C_15866	-0.127972	3.72341	0.0223708	FALSE
YDR432W	NPL3	chrIV_1335762_G_T_15915	-0.107541	0.803749	0.738062	FALSE
YDR433W	YDR433W	chrIV_1335762_G_T_15915	0.0480836	1.36852	0.483731	FALSE
YDR434W	GPI17	chrIV_1335762_G_T_15915	0.220045	6.71813	0.000821355	FALSE
YDR435C	PPM1	chrIV_1335762_G_T_15915	0.0886183	1.79604	0.305184	FALSE
YDR436W	PPZ2	chrIV_1335762_G_T_15915	0.156724	1.96453	0.255048	FALSE
YDR438W	THI74	chrIV_1335762_G_T_15915	-0.0253207	0.444857	0.902045	FALSE
YDR439W	LRS4	chrIV_1344480_A_G_15973	0.0447144	0.968491	0.670145	FALSE
YDR440W	DOT1	chrIV_1344480_A_G_15973	-0.0332787	0.984461	0.66266	FALSE
YDR441C	APT2	chrIV_1344480_A_G_15973	-0.447022	55.0584	0	FALSE
YDR447C	RPS17B	chrIV_1357702_C_T_16039	-0.00882643	1.76732	0.314759	FALSE
YDR448W	ADA2	chrIV_1357702_C_T_16039	-0.0136031	0.978257	0.665613	FALSE
YDR449C	UTP6	chrIV_1357702_C_T_16039	0.00887951	0.775681	0.751253	FALSE
YDR450W	RPS18A	chrIV_1361086_C_T_16054	-0.0162066	3.92257	0.0189267	FALSE
YDR451C	YHP1	chrIV_1361086_C_T_16054	-0.00936627	0.872993	0.709334	FALSE
YDR454C	GUK1	chrIV_1365753_T_C_16068	0.0325162	3.06623	0.0552939	FALSE
YDR456W	NHX1	chrIV_1365753_T_C_16068	-0.0143815	0.710925	0.78234	FALSE
YDR457W	TOM1	chrIV_1381771_A_T_16129	-0.190829	10.0702	0.000609756	FALSE
YDR458C	HEH2	chrIV_1381771_A_T_16129	0.00575632	0.595697	0.835381	FALSE
YDR459C	PFA5	chrIV_1383527_C_T_16137	0.0550944	0.910385	0.694332	FALSE
YDR460W	TFB3	chrIV_1383527_C_T_16137	-0.0228416	1.12809	0.593635	FALSE
YDR461C-A	YDR461C-A	chrIV_1386403_C_A_16161	0.0550543	0.582689	0.839542	FALSE
YDR461W	MFA1	chrIV_1386403_C_A_16161	-0.206786	70.2286	0	TRUE
YDR462W	MRPL28	chrIV_1386403_C_A_16161	0.049155	4.08897	0.0144628	FALSE
YDR464W	SPP41	chrIV_1393320_T_A_16209	0.0213821	1.23465	0.549793	FALSE
YDR465C	RMT2	chrIV_1393320_T_A_16209	0.149964	10.3416	0.000609756	FALSE
YDR466W	PKH3	chrIV_1397817_A_G_16231	-0.0173471	0.716929	0.779757	FALSE
YDR468C	TLG1	chrIV_1397817_A_G_16231	-0.0342084	0.627655	0.818672	FALSE
YDR469W	SDC1	chrIV_1399536_T_C_16235	-0.598689	68.1669	0	FALSE
YDR470C	UGO1	chrIV_1399536_T_C_16235	-0.0677543	1.21479	0.557251	FALSE
YDR471W	RPL27B	chrIV_1404228_G_A_16260	-0.0145468	1.42192	0.45695	FALSE
YDR472W	TRS31	chrIV_1404228_G_A_16260	0.0860253	2.4624	0.136917	FALSE
YDR473C	PRP3	chrIV_1404228_G_A_16260	0.00117922	0.495559	0.879227	FALSE
YDR476C	YDR476C	chrIV_1411151_C_T_16295	0.00485753	1.64783	0.364653	FALSE
YDR477W	SNF1	chrIV_1411151_C_T_16295	-0.0131592	0.482036	0.885209	FALSE
YDR478W	SNM1	chrIV_1418091_G_A_16330	-0.0378418	0.539442	0.860302	FALSE
YDR479C	PEX29	chrIV_1418091_G_A_16330	-0.0180432	0.336274	0.944025	FALSE
YDR480W	DIG2	chrIV_1418091_G_A_16330	0.024914	0.586462	0.838641	FALSE
YDR481C	PHO8	chrIV_1419993_T_C_16335	-0.160164	4.02571	0.0155097	FALSE
YDR482C	CWC21	chrIV_1419993_T_C_16335	-0.0419984	2.00908	0.240676	FALSE
YDR483W	KRE2	chrIV_1422918_A_G_16363	-0.0120717	1.12426	0.59598	FALSE
YDR484W	VPS52	chrIV_1422918_A_G_16363	-0.0314547	1.54545	0.402242	FALSE
YDR485C	VPS72	chrIV_1422918_A_G_16363	-0.0696736	1.51672	0.415795	FALSE
YDR486C	VPS60	chrIV_1431857_T_C_16423	0.0196003	1.66394	0.357423	FALSE
YDR487C	RIB3	chrIV_1431857_T_C_16423	0.0876592	3.58642	0.0267052	FALSE
YDR488C	PAC11	chrIV_1431857_T_C_16423	-0.0709978	2.50513	0.129465	FALSE
YDR489W	SLD5	chrIV_1431857_T_C_16423	0.290016	9.82793	0.000609756	FALSE
YDR490C	PKH1	chrIV_1431857_T_C_16423	0.47522	30.4403	0	FALSE
YDR493W	MZM1	chrIV_1436636_C_T_16445	-0.0547559	1.37785	0.47896	FALSE
YDR494W	RSM28	chrIV_1436636_C_T_16445	0.0638331	1.23376	0.550178	FALSE
YDR495C	VPS3	chrIV_1436636_C_T_16445	0.0608619	0.932186	0.683376	FALSE
YDR496C	PUF6	chrIV_1444058_C_A_16487	0.0271104	0.342959	0.94216	FALSE
YDR497C	ITR1	chrIV_1444058_C_A_16487	0.204126	139.633	0	FALSE
YDR498C	SEC20	chrIV_1444058_C_A_16487	-0.00457055	1.83858	0.293173	FALSE
YDR499W	LCD1	chrIV_1452837_T_C_16579	-0.181196	4.8143	0.00433604	FALSE
YDR500C	RPL37B	chrIV_1452837_T_C_16579	0.00589522	1.41453	0.460688	FALSE
YDR501W	PLM2	chrIV_1452837_T_C_16579	-0.098918	1.07862	0.615748	FALSE
YDR502C	SAM2	chrIV_1452837_T_C_16579	-0.0254542	2.2614	0.17599	FALSE
YDR503C	LPP1	chrIV_1456284_G_C_16598	0.0894924	2.31174	0.164063	FALSE
YDR504C	SPG3	chrIV_1456284_G_C_16598	0.10601	1.57925	0.390003	FALSE
YDR505C	PSP1	chrIV_1456284_G_C_16598	-0.0380284	1.4349	0.451146	FALSE
YDR506C	GMC1	chrIV_1456284_G_C_16598	-0.029519	0.459283	0.895911	FALSE
YDR507C	GIN4	chrIV_1468406_C_T_16722	-0.110099	6.00864	0.00141343	FALSE
YDR508C	GNP1	chrIV_1468406_C_T_16722	0.136726	4.86178	0.00408719	FALSE
YDR511W	SDH7	chrIV_1470400_G_A_16742	0.0669225	1.37349	0.481276	FALSE
YDR512C	EMI1	chrIV_1470400_G_A_16742	-0.00415382	1.54059	0.404003	FALSE
YDR519W	FPR2	chrIV_1480972_A_G_16799	-0.193861	17.4582	0	FALSE
YDR520C	URC2	chrIV_1480972_A_G_16799	-0.00165815	0.384545	0.926112	FALSE
YDR524C-A	YDR524C-A	chrIV_1489005_C_T_16834	-0.102846	9.68629	0.000609756	FALSE
YDR524C-B	YDR524C-B	chrIV_1489005_C_T_16834	0.00816959	3.17796	0.0466165	FALSE
YDR525W-A	SNA2	chrIV_1491981_C_T_16849	-0.00647546	1.06528	0.623108	FALSE
YDR527W	RBA50	chrIV_1491981_C_T_16849	-0.0769747	1.82391	0.295982	FALSE
YDR538W	PAD1	chrIV_1505809_C_G_16983	0.167985	2.95812	0.0658429	FALSE
YDR539W	FDC1	chrIV_1505809_C_G_16983	-0.654239	65.4664	0	FALSE
YDR540C	IRC4	chrIV_1521941_A_G_17149	0.835628	10.281	0.000609756	FALSE
YDR541C	YDR541C	chrIV_1521941_A_G_17149	-0.220691	4.54849	0.00665813	FALSE
YEL001C	IRC22	chrV_154497_C_T_17999	0.0232829	0.617619	0.823348	FALSE
YEL002C	WBP1	chrV_145464_T_G_17990	0.00966682	0.568414	0.84608	FALSE
YEL003W	GIM4	chrV_145464_T_G_17990	-0.0189099	0.493903	0.879992	FALSE
YEL004W	YEA4	chrV_145464_T_G_17990	-0.080157	0.939326	0.680805	FALSE
YEL005C	VAB2	chrV_145464_T_G_17990	-0.0176319	0.756551	0.759901	FALSE
YEL006W	YEA6	chrV_145464_T_G_17990	-0.197133	5.31643	0.00280374	FALSE
YEL007W	MIT1	chrV_145464_T_G_17990	0.0107795	0.449345	0.900774	FALSE
YEL009C	GCN4	chrV_145464_T_G_17990	0.0384497	4.79538	0.00459459	FALSE
YEL011W	GLC3	chrV_131173_C_A_17945	-0.0777534	1.85133	0.289883	FALSE
YEL012W	UBC8	chrV_131173_C_A_17945	-0.117731	3.14864	0.0483873	FALSE
YEL013W	VAC8	chrV_131173_C_A_17945	0.00949087	0.440745	0.903209	FALSE
YEL015W	EDC3	chrV_125204_G_C_17929	0.0171905	0.439417	0.903639	FALSE
YEL016C	NPP2	chrV_125204_G_C_17929	-0.147941	2.04095	0.230286	FALSE
YEL017C-A	PMP2	chrV_123482_A_G_17924	0.0127392	1.58964	0.387043	FALSE
YEL017W	GTT3	chrV_123482_A_G_17924	0.0172279	0.453094	0.89903	FALSE
YEL018W	EAF5	chrV_123482_A_G_17924	0.0772853	1.10042	0.605945	FALSE
YEL019C	MMS21	chrV_123482_A_G_17924	-0.07695	1.61203	0.378251	FALSE
YEL020C	PXP1	chrV_117288_T_C_17892	-0.73413	20.1049	0	FALSE
YEL020W-A	TIM9	chrV_117288_T_C_17892	-0.0268731	1.0696	0.621041	FALSE
YEL021W	URA3	chrV_117288_T_C_17892	-0.0168675	0.623516	0.820276	FALSE
YEL022W	GEA2	chrV_115669_T_A_17884	-0.014597	0.861142	0.715198	FALSE
YEL023C	YEL023C	chrV_115669_T_A_17884	0.317286	3.35633	0.0373077	FALSE
YEL024W	RIP1	chrV_101531_T_C_17831	-0.00300066	0.648404	0.810057	FALSE
YEL025C	YEL025C	chrV_101531_T_C_17831	0.101201	1.73155	0.327384	FALSE
YEL026W	SNU13	chrV_101531_T_C_17831	-0.0122077	0.619517	0.821985	FALSE
YEL027W	VMA3	chrV_101531_T_C_17831	0.00852645	1.69174	0.346398	FALSE
YEL028W	YEL028W	chrV_101531_T_C_17831	-0.41415	2.66576	0.103185	FALSE
YEL029C	BUD16	chrV_101531_T_C_17831	0.0505555	0.835597	0.726534	FALSE
YEL030W	ECM10	chrV_101531_T_C_17831	-0.106975	0.505224	0.874733	FALSE
YEL031W	SPF1	chrV_86742_A_T_17757	0.0105169	2.09467	0.217248	FALSE
YEL032W	MCM3	chrV_86742_A_T_17757	0.025122	0.878025	0.70778	FALSE
YEL033W	MTC7	chrV_86742_A_T_17757	-0.0951538	0.675161	0.797706	FALSE
YEL034W	HYP2	chrV_86742_A_T_17757	-0.00488042	0.557789	0.850551	FALSE
YEL037C	RAD23	chrV_81049_C_T_17739	-0.110368	5.5352	0.00201681	FALSE
YEL038W	UTR4	chrV_81049_C_T_17739	-0.00607347	0.817171	0.733924	FALSE
YEL042W	GDA1	chrV_73959_T_C_17713	0.00905481	1.21059	0.558824	FALSE
YEL043W	YEL043W	chrV_73959_T_C_17713	0.0606276	1.68342	0.350269	FALSE
YEL044W	IES6	chrV_68468_A_G_17693	0.0141088	1.74702	0.320624	FALSE
YEL045C	YEL045C	chrV_68468_A_G_17693	-0.0020976	0.741185	0.767089	FALSE
YEL046C	GLY1	chrV_68468_A_G_17693	0.00729946	1.81375	0.299867	FALSE
YEL047C	FRD1	chrV_67018_G_C_17690	0.0847021	4.72247	0.00471589	FALSE
YEL048C	TCA17	chrV_67018_G_C_17690	-0.17845	0.698829	0.78819	FALSE
YEL049W	PAU2	chrV_67018_G_C_17690	0.716454	8.36816	0.000609756	FALSE
YEL050C	RML2	chrV_59515_T_C_17626	-0.0146721	0.410927	0.915584	FALSE
YEL051W	VMA8	chrV_59515_T_C_17626	-0.0203922	1.11375	0.6014	FALSE
YEL052W	AFG1	chrV_59515_T_C_17626	-0.201746	4.03926	0.0154882	FALSE
YEL053C	MAK10	chrV_53456_G_A_17601	-0.0334903	0.858447	0.716533	FALSE
YEL054C	RPL12A	chrV_53456_G_A_17601	-0.00785837	0.951445	0.676926	FALSE
YEL055C	POL5	chrV_53456_G_A_17601	0.0982157	3.63233	0.0252138	FALSE
YEL056W	HAT2	chrV_53456_G_A_17601	-0.0947136	2.95818	0.0658401	FALSE
YEL057C	SDD1	chrV_41973_G_T_17518	0.101199	2.20954	0.189059	FALSE
YEL058W	PCM1	chrV_41973_G_T_17518	0.12041	4.2176	0.0115036	FALSE
YEL059C-A	SOM1	chrV_41973_G_T_17518	-0.00498489	0.324425	0.9478	FALSE
YEL060C	PRB1	chrV_41973_G_T_17518	-0.0331561	0.486966	0.883096	FALSE
YEL061C	CIN8	chrV_41973_G_T_17518	-0.136781	3.33138	0.039641	FALSE
YEL062W	NPR2	chrV_31867_T_C_17474	-0.0767841	0.654596	0.807486	FALSE
YEL063C	CAN1	chrV_31867_T_C_17474	0.199139	6.11272	0.00141343	FALSE
YEL064C	AVT2	chrV_31867_T_C_17474	-0.129678	1.42819	0.453734	FALSE
YER001W	MNN1	chrV_154497_C_T_17999	-0.0294296	1.18612	0.569247	FALSE
YER002W	NOP16	chrV_154497_C_T_17999	-0.00776114	0.369486	0.932212	FALSE
YER003C	PMI40	chrV_154497_C_T_17999	0.0371651	1.89208	0.276517	FALSE
YER004W	FMP52	chrV_162474_G_A_18013	0.0843298	3.82769	0.0199625	FALSE
YER005W	YND1	chrV_162474_G_A_18013	-0.218936	5.73082	0.00201681	FALSE
YER006W	NUG1	chrV_162474_G_A_18013	-0.025667	1.2361	0.549171	FALSE
YER007C-A	TMA20	chrV_162474_G_A_18013	-0.0135054	0.348488	0.9404	FALSE
YER007W	PAC2	chrV_162474_G_A_18013	0.0410065	0.660691	0.805094	FALSE
YER008C	SEC3	chrV_162474_G_A_18013	-0.0292572	0.828013	0.72896	FALSE
YER009W	NTF2	chrV_178371_C_T_18064	-0.00096077	1.42728	0.454203	FALSE
YER010C	YER010C	chrV_178371_C_T_18064	-0.0422476	0.949173	0.677654	FALSE
YER011W	TIR1	chrV_178371_C_T_18064	-0.0595644	1.51799	0.415387	FALSE
YER012W	PRE1	chrV_178371_C_T_18064	-0.0192388	1.82277	0.296268	FALSE
YER015W	FAA2	chrV_187482_T_A_18104	0.0367234	0.647223	0.81068	FALSE
YER016W	BIM1	chrV_187482_T_A_18104	0.0127916	0.633575	0.816593	FALSE
YER017C	AFG3	chrV_192024_T_C_18139	0.0158845	0.404713	0.917683	FALSE
YER018C	SPC25	chrV_192024_T_C_18139	0.0910269	7.08063	0.000821355	TRUE
YER019C-A	SBH2	chrV_195290_G_T_18155	-0.0140109	1.08659	0.61289	FALSE
YER019W	ISC1	chrV_192024_T_C_18139	0.0880455	1.88558	0.279466	FALSE
YER020W	GPA2	chrV_195290_G_T_18155	-0.0326413	0.674297	0.798135	FALSE
YER021W	RPN3	chrV_199202_C_T_18168	-0.0279711	1.22448	0.553733	FALSE
YER022W	SRB4	chrV_199202_C_T_18168	0.128149	3.54077	0.0284783	FALSE
YER023W	PRO3	chrV_199202_C_T_18168	0.0398665	4.96766	0.00335664	FALSE
YER024W	YAT2	chrV_205225_G_A_18192	0.19005	2.72873	0.0921821	FALSE
YER025W	GCD11	chrV_205225_G_A_18192	-0.0221719	2.15764	0.201654	FALSE
YER027C	GAL83	chrV_210504_G_A_18238	-0.0359459	2.95427	0.0660077	FALSE
YER028C	MIG3	chrV_210504_G_A_18238	0.0294227	2.61463	0.110636	FALSE
YER029C	SMB1	chrV_213822_G_A_18276	-0.0214478	1.50916	0.418309	FALSE
YER030W	CHZ1	chrV_213822_G_A_18276	0.189329	22.6562	0	FALSE
YER031C	YPT31	chrV_213822_G_A_18276	0.0436498	2.13789	0.207086	FALSE
YER033C	ZRG8	chrV_222592_T_A_18335	-0.0424786	0.411892	0.915192	FALSE
YER034W	YER034W	chrV_222592_T_A_18335	-0.00730877	1.47895	0.429811	FALSE
YER037W	PHM8	chrV_226491_C_T_18368	-0.0761831	3.86416	0.0197757	FALSE
YER038C	KRE29	chrV_226491_C_T_18368	0.0778409	1.3942	0.472057	FALSE
YER039C	HVG1	chrV_226491_C_T_18368	0.934233	99.4994	0	FALSE
YER040W	GLN3	chrV_226491_C_T_18368	0.108567	2.29085	0.16926	FALSE
YER041W	YEN1	chrV_226491_C_T_18368	-0.0112998	1.06495	0.623266	FALSE
YER042W	MXR1	chrV_243377_G_A_18465	0.0425727	1.87395	0.283751	FALSE
YER043C	SAH1	chrV_243377_G_A_18465	0.0510755	12.0871	0	FALSE
YER044C	ERG28	chrV_243377_G_A_18465	-0.126941	14.6921	0	FALSE
YER045C	ACA1	chrV_243377_G_A_18465	-0.138919	2.59287	0.114223	FALSE
YER046W	SPO73	chrV_243377_G_A_18465	-0.344159	37.0056	0	FALSE
YER047C	SAP1	chrV_243377_G_A_18465	-0.131266	1.41002	0.462956	FALSE
YER056C-A	RPL34A	chrV_270473_T_C_18672	0.00104875	1.15764	0.580967	FALSE
YER057C	HMF1	chrV_270473_T_C_18672	-0.027146	1.466	0.436246	FALSE
YER058W	PET117	chrV_272709_C_T_18680	0.0315712	1.05374	0.628323	FALSE
YER059W	PCL6	chrV_272709_C_T_18680	0.0271969	0.227422	0.978056	FALSE
YER063W	THO1	chrV_282297_C_T_18719	0.0473049	2.56172	0.118413	FALSE
YER064C	VHR2	chrV_282297_C_T_18719	0.223754	3.50654	0.0305136	FALSE
YER066W	RRT13	chrV_293229_C_T_18783	0.133339	2.89743	0.0729943	FALSE
YER067W	RGI1	chrV_293229_C_T_18783	0.0905636	3.40494	0.034497	FALSE
YER068W	MOT2	chrV_293229_C_T_18783	0.0142491	0.554858	0.851871	FALSE
YER070W	RNR1	chrV_301867_C_A_18810	-0.000157157	0.0720637	0.998538	FALSE
YER071C	TDA2	chrV_301867_C_A_18810	-0.0322913	1.71125	0.336835	FALSE
YER072W	VTC1	chrV_301867_C_A_18810	-0.0100079	1.87688	0.283066	FALSE
YER073W	ALD5	chrV_301867_C_A_18810	0.0452586	1.93677	0.263032	FALSE
YER074W	RPS24A	chrV_308152_C_T_18833	-0.00552272	1.41107	0.462431	FALSE
YER074W-A	YOS1	chrV_308152_C_T_18833	0.136859	6.62917	0.000821355	FALSE
YER075C	PTP3	chrV_308152_C_T_18833	-0.00350493	0.400923	0.918917	FALSE
YER076C	YER076C	chrV_308152_C_T_18833	-0.652581	7.91814	0.000609756	FALSE
YER077C	MRX1	chrV_318940_A_G_18910	-0.154387	1.84115	0.292655	FALSE
YER078C	ICP55	chrV_318940_A_G_18910	0.10377	1.54678	0.401759	FALSE
YER079W	YER079W	chrV_318940_A_G_18910	-0.023424	1.26691	0.53383	FALSE
YER082C	UTP7	chrV_325661_T_C_18941	-0.00892974	1.33263	0.502391	FALSE
YER083C	GET2	chrV_325661_T_C_18941	0.181988	20.189	0	FALSE
YER084W	YER084W	chrV_327452_C_T_18953	-0.119131	1.53417	0.407096	FALSE
YER086W	ILV1	chrV_327452_C_T_18953	0.0405973	2.16478	0.200102	FALSE
YER087C-B	SBH1	chrV_331977_G_A_18967	0.00693742	0.765793	0.755918	FALSE
YER087W	AIM10	chrV_331977_G_A_18967	0.109212	1.40741	0.464487	FALSE
YER092W	IES5	chrV_342869_T_C_19022	-0.000157089	1.4094	0.463319	FALSE
YER093C	TSC11	chrV_342869_T_C_19022	0.159688	2.25343	0.177662	FALSE
YER093C-A	AIM11	chrV_348050_C_G_19044	-0.0274703	0.0861828	0.997689	FALSE
YER094C	PUP3	chrV_348050_C_G_19044	-0.0517236	3.02484	0.0581143	FALSE
YER097W	YER097W	chrV_358579_G_C_19107	-0.0669071	1.45304	0.442336	FALSE
YER098W	UBP9	chrV_358579_G_C_19107	0.0445098	0.231206	0.977252	FALSE
YER099C	PRS2	chrV_358579_G_C_19107	0.00502187	1.00463	0.651344	FALSE
YER100W	UBC6	chrV_360318_C_A_19112	0.00216079	1.49716	0.423037	FALSE
YER101C	AST2	chrV_360318_C_A_19112	0.313416	8.96443	0.000609756	FALSE
YER102W	RPS8B	chrV_362931_C_T_19144	-0.0128773	2.71069	0.0954616	FALSE
YER103W	SSA4	chrV_362931_C_T_19144	-0.0661124	0.93653	0.681812	FALSE
YER104W	RTT105	chrV_362931_C_T_19144	0.0746271	10.5842	0.000609756	TRUE
YER105C	NUP157	chrV_373400_T_A_19211	0.127647	7.01779	0.000821355	FALSE
YER106W	MAM1	chrV_373400_T_A_19211	1.19046	13.2384	0	FALSE
YER107C	GLE2	chrV_373400_T_A_19211	0.116238	5.03493	0.00309423	FALSE
YER111C	SWI4	chrV_387774_T_C_19299	-0.0957403	1.98906	0.246443	FALSE
YER112W	LSM4	chrV_387774_T_C_19299	-0.0937217	7.21388	0.000609756	FALSE
YER113C	TMN3	chrV_387774_T_C_19299	0.217716	8.22296	0.000609756	FALSE
YER115C	SPR6	chrV_394349_G_A_19351	-0.229413	4.04687	0.0154882	FALSE
YER116C	SLX8	chrV_394349_G_A_19351	-0.36986	3.77696	0.0205884	FALSE
YER117W	RPL23B	chrV_397892_G_A_19384	0.00406546	0.498915	0.877677	FALSE
YER118C	SHO1	chrV_397892_G_A_19384	0.132194	3.87655	0.0197002	FALSE
YER121W	YER121W	chrV_403012_C_A_19413	0.181479	3.41105	0.0342958	FALSE
YER122C	GLO3	chrV_403012_C_A_19413	0.121328	8.52347	0.000609756	FALSE
YER123W	YCK3	chrV_407199_T_C_19433	-0.0577331	2.29733	0.167569	FALSE
YER124C	DSE1	chrV_407199_T_C_19433	-0.317781	5.37885	0.00280374	FALSE
YER127W	LCP5	chrV_415411_C_A_19475	0.0870338	4.54795	0.00665813	FALSE
YER128W	VFA1	chrV_415411_C_A_19475	0.12201	3.03568	0.057674	FALSE
YER129W	SAK1	chrV_421193_A_G_19506	-0.156698	3.37741	0.03633	FALSE
YER130C	COM2	chrV_421193_A_G_19506	0.0405927	0.571827	0.844467	FALSE
YER131W	RPS26B	chrV_421193_A_G_19506	-0.00226429	0.608306	0.82962	FALSE
YER132C	PMD1	chrV_433844_T_C_19533	-0.11055	2.26208	0.175843	FALSE
YER133W	GLC7	chrV_433844_T_C_19533	0.00747326	0.486957	0.8831	FALSE
YER136W	GDI1	chrV_441792_T_A_19560	0.00504868	0.890609	0.702236	FALSE
YER137C	YER137C	chrV_441792_T_A_19560	-0.0234478	1.08544	0.613246	FALSE
YER139C	RTR1	chrV_441792_T_A_19560	0.0267308	1.93023	0.264578	FALSE
YER140W	EMP65	chrV_460994_T_C_19650	-0.0411094	0.778103	0.749963	FALSE
YER141W	COX15	chrV_460994_T_C_19650	0.00108314	0.688763	0.792561	FALSE
YER142C	MAG1	chrV_460994_T_C_19650	0.156286	2.67814	0.10045	FALSE
YER143W	DDI1	chrV_460994_T_C_19650	-0.0158016	1.61564	0.377133	FALSE
YER144C	UBP5	chrV_460994_T_C_19650	-0.395418	9.76393	0.000609756	FALSE
YER145C	FTR1	chrV_460994_T_C_19650	-0.177779	165.808	0	FALSE
YER148W	SPT15	chrV_465932_A_G_19671	0.174752	20.3084	0	FALSE
YER149C	PEA2	chrV_465932_A_G_19671	-0.0126474	0.187127	0.985873	FALSE
YER151C	UBP3	chrV_472738_T_C_19725	-0.0711245	0.881212	0.706607	FALSE
YER152C	YER152C	chrV_472738_T_C_19725	0.190983	12.9719	0	FALSE
YER158W-A	YER158W-A	chrV_491171_T_C_19847	-0.00991385	0.664675	0.803028	FALSE
YER159C	BUR6	chrV_491171_T_C_19847	-0.018423	0.17881	0.987113	FALSE
YER161C	SPT2	chrV_502034_T_C_19878	-0.154915	3.04004	0.0573987	FALSE
YER162C	RAD4	chrV_502034_T_C_19878	0.0746687	0.872612	0.709451	FALSE
YER164W	CHD1	chrV_511641_T_A_19917	0.0327281	1.34775	0.493266	FALSE
YER165W	PAB1	chrV_511641_T_A_19917	0.00656791	4.89682	0.00357143	FALSE
YER166W	DNF1	chrV_511641_T_A_19917	0.0414258	1.04454	0.632428	FALSE
YER167W	BCK2	chrV_521119_G_A_19947	-0.0913298	1.04962	0.630105	FALSE
YER168C	CCA1	chrV_521119_G_A_19947	-0.101239	2.04495	0.229556	FALSE
YER169W	RPH1	chrV_526682_G_C_19974	-0.0652366	1.32791	0.50496	FALSE
YER170W	ADK2	chrV_526682_G_C_19974	0.00338364	0.521078	0.868224	FALSE
YER171W	RAD3	chrV_526682_G_C_19974	0.0410054	1.15874	0.580687	FALSE
YER172C	BRR2	chrV_526682_G_C_19974	0.000932132	1.18941	0.568023	FALSE
YER173W	RAD24	chrV_541972_G_A_20054	0.185955	3.14637	0.0484558	FALSE
YER174C	GRX4	chrV_541972_G_A_20054	-0.0714674	1.47803	0.430289	FALSE
YER175C	TMT1	chrV_541972_G_A_20054	0.098438	4.18804	0.0122642	FALSE
YER176W	ECM32	chrV_541972_G_A_20054	0.0632082	2.48002	0.134433	FALSE
YER177W	BMH1	chrV_546069_A_C_20079	-0.0448598	10.4418	0.000609756	FALSE
YER178W	PDA1	chrV_546069_A_C_20079	-0.0253258	1.89327	0.276134	FALSE
YER180C	ISC10	chrV_551815_T_C_20130	-0.0795108	0.804923	0.737711	FALSE
YER182W	FMP10	chrV_551815_T_C_20130	-0.22233	5.49693	0.00223642	FALSE
YER183C	FAU1	chrV_551815_T_C_20130	0.0217548	1.17646	0.573088	FALSE
YER184C	TOG1	chrV_551815_T_C_20130	0.370603	2.55973	0.118625	FALSE
YER186C	YER186C	chrV_567335_G_C_20552	0.962694	63.4684	0	FALSE
YER187W	YER187W	chrV_567335_G_C_20552	0.415559	7.32041	0.000609756	FALSE
YER188W	YER188W	chrV_567335_G_C_20552	1.14543	9.10086	0.000609756	FALSE
YFL001W	DEG1	chrVI_145095_G_T_21679	-0.233906	7.317	0.000609756	FALSE
YFL002C	SPB4	chrVI_145095_G_T_21679	-0.0276619	3.65414	0.0243431	FALSE
YFL004W	VTC2	chrVI_129250_C_T_21626	-0.0359417	0.550576	0.853799	FALSE
YFL005W	SEC4	chrVI_129250_C_T_21626	-0.00551099	0.263152	0.96702	FALSE
YFL007W	BLM10	chrVI_129250_C_T_21626	-0.0518216	0.896595	0.69944	FALSE
YFL009W	CDC4	chrVI_114971_T_C_21602	-0.00730306	0.400848	0.918941	FALSE
YFL010C	WWM1	chrVI_114971_T_C_21602	-0.00328117	0.154372	0.989973	FALSE
YFL013C	IES1	chrVI_108452_A_G_21544	-0.00201337	0.272608	0.964208	FALSE
YFL014W	HSP12	chrVI_108452_A_G_21544	-0.167195	35.8574	0	FALSE
YFL016C	MDJ1	chrVI_108452_A_G_21544	-0.0253121	0.642182	0.813338	FALSE
YFL017C	GNA1	chrVI_101727_G_A_21511	-0.0781851	3.38655	0.0356181	FALSE
YFL017W-A	SMX2	chrVI_101727_G_A_21511	-0.100653	2.15907	0.201346	FALSE
YFL018C	LPD1	chrVI_101727_G_A_21511	-0.0611337	2.80874	0.0806835	FALSE
YFL021W	GAT1	chrVI_96436_T_C_21449	-0.0322875	1.25573	0.539904	FALSE
YFL022C	FRS2	chrVI_96436_T_C_21449	-0.060747	3.00832	0.059456	FALSE
YFL023W	BUD27	chrVI_96436_T_C_21449	-0.143509	3.56126	0.0278256	FALSE
YFL024C	EPL1	chrVI_96436_T_C_21449	-0.211174	5.05983	0.00301205	FALSE
YFL025C	BST1	chrVI_79311_A_G_21324	-0.08183	0.85652	0.717398	FALSE
YFL026W	STE2	chrVI_79311_A_G_21324	-0.00290117	1.34672	0.493871	FALSE
YFL027C	GYP8	chrVI_79311_A_G_21324	0.0351456	1.83311	0.293986	FALSE
YFL028C	CAF16	chrVI_79311_A_G_21324	0.0879733	2.59613	0.113674	FALSE
YFL029C	CAK1	chrVI_78036_T_C_21317	-0.24003	3.52243	0.0298894	FALSE
YFL030W	AGX1	chrVI_78036_T_C_21317	-0.601496	22.4485	0	FALSE
YFL031C-A	YFL031C-A	chrVI_76151_C_A_21297	0.939231	21.6308	0	FALSE
YFL031W	HAC1	chrVI_76151_C_A_21297	0.158663	85.3304	0	FALSE
YFL032W	YFL032W	chrVI_74143_G_A_21273	0.0345013	1.72973	0.328309	FALSE
YFL033C	RIM15	chrVI_74143_G_A_21273	-0.115267	1.71288	0.336177	FALSE
YFL034C-A	RPL22B	chrVI_64442_G_C_21164	0.0341579	2.77278	0.0857337	FALSE
YFL034C-B	MOB2	chrVI_63007_T_C_21154	0.30846	11.4076	0	FALSE
YFL034W	MIL1	chrVI_64442_G_C_21164	-0.0291158	1.37864	0.478538	FALSE
YFL036W	RPO41	chrVI_63007_T_C_21154	0.109313	2.83904	0.0783236	FALSE
YFL038C	YPT1	chrVI_54858_A_G_21126	0.000773672	1.78336	0.309535	FALSE
YFL039C	ACT1	chrVI_54858_A_G_21126	0.0125655	1.19642	0.565042	FALSE
YFL041W	FET5	chrVI_46778_A_G_21097	-0.03921	1.08433	0.61359	FALSE
YFL041W-A	YFL041W-A	chrVI_46778_A_G_21097	0.187442	2.5945	0.113948	FALSE
YFL042C	LAM5	chrVI_46778_A_G_21097	0.0177874	0.52587	0.866623	FALSE
YFL044C	OTU1	chrVI_44754_C_T_21094	-0.13341	2.35588	0.156062	FALSE
YFL045C	SEC53	chrVI_44754_C_T_21094	0.0306794	2.57633	0.116715	FALSE
YFL046W	FMP32	chrVI_44754_C_T_21094	0.00301437	1.00653	0.650312	FALSE
YFL047W	RGD2	chrVI_38909_A_G_21052	0.0694567	1.08994	0.61185	FALSE
YFL048C	EMP47	chrVI_38909_A_G_21052	0.189541	6.75529	0.000821355	FALSE
YFL049W	SWP82	chrVI_38909_A_G_21052	-0.478565	17.0519	0	FALSE
YFL058W	THI5	chrVI_16409_G_A_20801	3.55156	41.6244	0	FALSE
YFL059W	SNZ3	chrVI_16409_G_A_20801	-0.200452	2.83556	0.0784315	FALSE
YFL062W	COS4	chrVI_16409_G_A_20801	-0.28097	10.1501	0.000609756	FALSE
YFR001W	LOC1	chrVI_145095_G_T_21679	0.0032574	0.621085	0.821218	FALSE
YFR002W	NIC96	chrVI_154357_C_A_21731	0.00900892	1.05397	0.628225	FALSE
YFR003C	YPI1	chrVI_154357_C_A_21731	-0.0438151	1.1194	0.598853	FALSE
YFR004W	RPN11	chrVI_154357_C_A_21731	-0.0347911	0.953947	0.67612	FALSE
YFR005C	SAD1	chrVI_154357_C_A_21731	0.00781019	0.855382	0.717909	FALSE
YFR006W	YFR006W	chrVI_156199_G_T_21735	0.0567835	1.23222	0.550845	FALSE
YFR007W	YFH7	chrVI_156199_G_T_21735	0.209463	2.31081	0.16423	FALSE
YFR010W	UBP6	chrVI_166705_G_C_21808	0.0395198	2.07655	0.221156	FALSE
YFR011C	MIC19	chrVI_166705_G_C_21808	0.0220568	0.88738	0.703738	FALSE
YFR013W	IOC3	chrVI_172598_A_T_21859	-0.18249	3.52455	0.0297508	FALSE
YFR014C	CMK1	chrVI_172598_A_T_21859	-0.0526418	1.98715	0.24721	FALSE
YFR016C	YFR016C	chrVI_182376_G_A_21941	0.30868	26.6138	0	FALSE
YFR017C	IGD1	chrVI_182376_G_A_21941	0.1715	8.3102	0.000609756	FALSE
YFR018C	YFR018C	chrVI_183176_A_C_21946	-0.249617	8.0894	0.000609756	FALSE
YFR019W	FAB1	chrVI_183176_A_C_21946	-0.00522991	0.832242	0.727384	FALSE
YFR020W	CSS2	chrVI_202052_A_G_22154	0.559215	6.11216	0.00141343	FALSE
YFR021W	ATG18	chrVI_202052_A_G_22154	-0.0755049	3.59299	0.0264281	FALSE
YFR022W	ROG3	chrVI_202052_A_G_22154	0.106171	1.48976	0.425374	FALSE
YFR024C-A	LSB3	chrVI_202052_A_G_22154	0.0316831	1.13072	0.592164	FALSE
YFR025C	HIS2	chrVI_203845_A_G_22170	0.590437	54.9745	0	FALSE
YFR026C	ULI1	chrVI_203845_A_G_22170	1.35658	15.4317	0	FALSE
YFR027W	ECO1	chrVI_208427_A_T_22235	-0.086702	2.053	0.227193	FALSE
YFR028C	CDC14	chrVI_208427_A_T_22235	0.0492537	1.51232	0.417209	FALSE
YFR029W	PTR3	chrVI_209238_A_C_22237	0.0805415	0.975348	0.666958	FALSE
YFR030W	MET10	chrVI_209238_A_C_22237	-0.0397677	2.40219	0.148854	FALSE
YFR031C	SMC2	chrVI_221044_A_G_22300	-0.140161	5.50775	0.00223642	FALSE
YFR031C-A	RPL2A	chrVI_221044_A_G_22300	-0.00670337	1.32948	0.504251	FALSE
YFR032C-A	RPL29	chrVI_224143_T_C_22330	-0.00887668	0.468947	0.890776	FALSE
YFR032C-B	YFR032C-B	chrVI_224143_T_C_22330	-0.0356706	0.699573	0.787854	FALSE
YFR033C	QCR6	chrVI_224143_T_C_22330	-0.0104265	0.53588	0.862166	FALSE
YFR040W	SAP155	chrVI_237463_T_A_22412	0.0995276	2.85133	0.0779184	FALSE
YFR041C	ERJ5	chrVI_237463_T_A_22412	0.162723	5.83005	0.00141343	FALSE
YFR042W	KEG1	chrVI_239066_C_T_22422	-0.175634	5.68999	0.00201681	FALSE
YFR043C	IRC6	chrVI_239066_C_T_22422	0.0268359	0.293885	0.957675	FALSE
YFR045W	YFR045W	chrVI_242529_G_A_22446	0.0253121	0.76754	0.755237	FALSE
YFR046C	CNN1	chrVI_242529_G_A_22446	0.00879795	0.594229	0.836003	FALSE
YFR052C-A	YFR052C-A	chrVI_252657_T_C_22520	0.333906	15.1994	0	FALSE
YFR052W	RPN12	chrVI_252657_T_C_22520	-0.0548204	2.62529	0.109288	FALSE
YFR053C	HXK1	chrVI_252657_T_C_22520	0.25365	13.0011	0	FALSE
YGL001C	ERG26	chrVII_496768_C_G_25597	0.0380222	1.54106	0.403831	FALSE
YGL002W	ERP6	chrVII_496768_C_G_25597	0.00653918	0.162645	0.98916	FALSE
YGL003C	CDH1	chrVII_491753_T_A_25573	0.113798	2.54647	0.12157	FALSE
YGL004C	RPN14	chrVII_491753_T_A_25573	0.071328	1.79332	0.306149	FALSE
YGL005C	COG7	chrVII_491753_T_A_25573	-0.0677871	1.10289	0.60521	FALSE
YGL006W	PMC1	chrVII_491753_T_A_25573	0.15379	6.65913	0.000821355	FALSE
YGL006W-A	YGL006W-A	chrVII_480426_G_T_25519	0.670391	19.5242	0	FALSE
YGL007C-A	YGL007C-A	chrVII_480426_G_T_25519	0.0133932	0.486232	0.88341	FALSE
YGL011C	SCL1	chrVII_474708_T_C_25479	0.00131832	1.14074	0.587861	FALSE
YGL012W	ERG4	chrVII_474708_T_C_25479	0.124462	14.3991	0	FALSE
YGL013C	PDR1	chrVII_474708_T_C_25479	-0.182833	5.28819	0.00284146	FALSE
YGL014W	PUF4	chrVII_462833_G_A_25416	-0.10855	2.45505	0.138224	FALSE
YGL016W	KAP122	chrVII_462833_G_A_25416	0.133334	2.2453	0.179279	FALSE
YGL018C	JAC1	chrVII_458993_C_T_25396	-0.347903	15.5313	0	FALSE
YGL019W	CKB1	chrVII_458993_C_T_25396	-0.00141478	0.770552	0.753984	FALSE
YGL020C	GET1	chrVII_457145_G_A_25390	-0.00326228	0.776453	0.750842	FALSE
YGL021W	ALK1	chrVII_457145_G_A_25390	0.0197876	0.564438	0.847722	FALSE
YGL022W	STT3	chrVII_452796_C_T_25378	0.014513	1.39414	0.47209	FALSE
YGL023C	PIB2	chrVII_452796_C_T_25378	-0.00304013	0.849701	0.720477	FALSE
YGL025C	PGD1	chrVII_452796_C_T_25378	-0.0709576	1.16855	0.576596	FALSE
YGL026C	TRP5	chrVII_452796_C_T_25378	0.0288904	4.11548	0.0139305	FALSE
YGL027C	CWH41	chrVII_452796_C_T_25378	-0.0946711	5.06699	0.00301205	FALSE
YGL028C	SCW11	chrVII_431168_G_C_25263	-0.0840813	0.288557	0.959404	FALSE
YGL029W	CGR1	chrVII_431168_G_C_25263	0.0198494	0.516276	0.870043	FALSE
YGL030W	RPL30	chrVII_431168_G_C_25263	0.00687565	1.4294	0.453116	FALSE
YGL031C	RPL24A	chrVII_431168_G_C_25263	0.000100005	0.244235	0.97351	FALSE
YGL032C	AGA2	chrVII_431168_G_C_25263	0.0303944	1.08776	0.612526	FALSE
YGL033W	HOP2	chrVII_431168_G_C_25263	-0.240163	1.17245	0.574871	FALSE
YGL035C	MIG1	chrVII_431168_G_C_25263	0.101048	1.08819	0.612393	FALSE
YGL036W	YGL036W	chrVII_431168_G_C_25263	0.0579151	0.831869	0.727478	FALSE
YGL037C	PNC1	chrVII_426136_C_T_25233	-0.0223108	1.02836	0.640028	FALSE
YGL038C	OCH1	chrVII_426136_C_T_25233	-0.0365994	0.773111	0.752621	FALSE
YGL039W	YGL039W	chrVII_426136_C_T_25233	0.0818318	2.19146	0.192764	FALSE
YGL040C	HEM2	chrVII_420882_C_T_25185	0.0195193	1.46031	0.438824	FALSE
YGL041W-A	YGL041W-A	chrVII_420882_C_T_25185	0.0141969	1.58414	0.388538	FALSE
YGL043W	DST1	chrVII_420882_C_T_25185	0.0093811	0.526251	0.866495	FALSE
YGL044C	RNA15	chrVII_420882_C_T_25185	0.0761961	0.713304	0.781316	FALSE
YGL045W	RIM8	chrVII_411293_G_A_25130	-0.0883235	1.83691	0.293422	FALSE
YGL047W	ALG13	chrVII_411293_G_A_25130	0.0724091	0.818197	0.733599	FALSE
YGL058W	RAD6	chrVII_394560_A_G_25064	-0.117259	2.58744	0.115079	FALSE
YGL059W	PKP2	chrVII_394560_A_G_25064	-0.150007	3.3216	0.0399538	FALSE
YGL060W	YBP2	chrVII_394560_A_G_25064	-0.284754	9.64932	0.000609756	FALSE
YGL061C	DUO1	chrVII_394560_A_G_25064	-0.0161575	0.135166	0.992143	FALSE
YGL062W	PYC1	chrVII_379937_T_C_24978	0.0181266	0.953955	0.676118	FALSE
YGL064C	MRH4	chrVII_379937_T_C_24978	0.094691	1.55785	0.398718	FALSE
YGL065C	ALG2	chrVII_379937_T_C_24978	-0.191687	7.89969	0.000609756	FALSE
YGL066W	SGF73	chrVII_379937_T_C_24978	0.176485	4.55493	0.00665813	FALSE
YGL067W	NPY1	chrVII_375227_A_T_24954	-0.147041	4.16568	0.0125108	FALSE
YGL068W	MNP1	chrVII_375227_A_T_24954	0.0503022	2.35859	0.155618	FALSE
YGL073W	HSF1	chrVII_369074_G_A_24915	-0.161392	3.68694	0.0231121	FALSE
YGL075C	MPS2	chrVII_369074_G_A_24915	-0.00959072	0.962261	0.673099	FALSE
YGL078C	DBP3	chrVII_360106_T_C_24857	0.050485	5.3948	0.00280374	TRUE
YGL079W	KXD1	chrVII_360106_T_C_24857	0.119588	3.60561	0.0260287	FALSE
YGL080W	MPC1	chrVII_360106_T_C_24857	0.174763	10.0756	0.000609756	FALSE
YGL081W	YGL081W	chrVII_360106_T_C_24857	1.09283	12.0097	0	FALSE
YGL082W	YGL082W	chrVII_360106_T_C_24857	-0.0850691	2.57515	0.11689	FALSE
YGL083W	SCY1	chrVII_360106_T_C_24857	0.172959	5.204	0.00301205	FALSE
YGL084C	GUP1	chrVII_348496_C_T_24783	0.0225792	0.0984012	0.996855	FALSE
YGL085W	LCL3	chrVII_348496_C_T_24783	0.0595548	1.75338	0.318757	FALSE
YGL086W	MAD1	chrVII_348496_C_T_24783	0.118871	5.16064	0.00301205	FALSE
YGL089C	MF(ALPHA)2	chrVII_344881_A_G_24757	-0.0334416	1.59	0.386946	FALSE
YGL090W	LIF1	chrVII_344881_A_G_24757	0.0591694	1.92776	0.26519	FALSE
YGL091C	NBP35	chrVII_341493_A_G_24740	-0.150751	5.87835	0.00141343	FALSE
YGL092W	NUP145	chrVII_341493_A_G_24740	-0.00275923	0.483686	0.884502	FALSE
YGL093W	SPC105	chrVII_341493_A_G_24740	-0.241861	7.78783	0.000609756	FALSE
YGL094C	PAN2	chrVII_326290_C_T_24624	0.0295374	1.25509	0.540282	FALSE
YGL095C	VPS45	chrVII_326290_C_T_24624	0.0418743	2.19856	0.191399	FALSE
YGL096W	TOS8	chrVII_326290_C_T_24624	-0.46907	58.0174	0	FALSE
YGL101W	YGL101W	chrVII_311249_G_A_24404	-0.0717249	1.55612	0.399131	FALSE
YGL103W	RPL28	chrVII_311249_G_A_24404	0.00455795	1.99321	0.244982	FALSE
YGL104C	VPS73	chrVII_308778_T_A_24397	-0.0338502	0.689829	0.792227	FALSE
YGL105W	ARC1	chrVII_308778_T_A_24397	-0.0268349	1.65728	0.360628	FALSE
YGL106W	MLC1	chrVII_306889_A_G_24394	-0.109726	16.3323	0	FALSE
YGL107C	RMD9	chrVII_306889_A_G_24394	0.11778	2.62053	0.110152	FALSE
YGL108C	YGL108C	chrVII_303486_C_T_24374	-0.00985819	0.48985	0.88186	FALSE
YGL110C	CUE3	chrVII_303486_C_T_24374	-0.0128315	0.681993	0.794682	FALSE
YGL111W	NSA1	chrVII_303486_C_T_24374	0.0374907	0.817034	0.733967	FALSE
YGL112C	TAF6	chrVII_295612_T_C_24332	-0.0574135	1.2201	0.555265	FALSE
YGL113W	SLD3	chrVII_295612_T_C_24332	-0.0102572	1.43388	0.451494	FALSE
YGL114W	YGL114W	chrVII_295612_T_C_24332	-0.0495542	1.75992	0.317154	FALSE
YGL115W	SNF4	chrVII_295612_T_C_24332	-0.0694359	4.07384	0.0146365	FALSE
YGL116W	CDC20	chrVII_295612_T_C_24332	0.0253791	0.782394	0.748137	FALSE
YGL117W	YGL117W	chrVII_295612_T_C_24332	-0.0646364	1.41464	0.460634	FALSE
YGL119W	COQ8	chrVII_281690_A_G_24250	-0.0171282	0.354886	0.938002	FALSE
YGL120C	PRP43	chrVII_281690_A_G_24250	0.063641	2.05717	0.225185	FALSE
YGL121C	GPG1	chrVII_281690_A_G_24250	-0.0734797	2.13292	0.208251	FALSE
YGL122C	NAB2	chrVII_278917_T_A_24223	0.0501355	1.4951	0.423683	FALSE
YGL123W	RPS2	chrVII_278917_T_A_24223	0.0515897	24.3496	0	FALSE
YGL127C	SOH1	chrVII_270343_A_G_24175	0.0193357	0.870702	0.710041	FALSE
YGL128C	CWC23	chrVII_270343_A_G_24175	-0.135852	3.75883	0.0209059	FALSE
YGL129C	RSM23	chrVII_267759_T_C_24148	-0.50094	23.4922	0	FALSE
YGL130W	CEG1	chrVII_267759_T_C_24148	0.0241135	0.886818	0.704	FALSE
YGL131C	SNT2	chrVII_267759_T_C_24148	-0.135515	1.33584	0.500403	FALSE
YGL133W	ITC1	chrVII_252720_T_C_24104	0.0353354	1.71514	0.335262	FALSE
YGL134W	PCL10	chrVII_252720_T_C_24104	-0.00341893	0.751004	0.762675	FALSE
YGL135W	RPL1B	chrVII_252720_T_C_24104	0.00621079	3.30037	0.040107	FALSE
YGL136C	MRM2	chrVII_252720_T_C_24104	-0.140435	3.33029	0.0396962	FALSE
YGL137W	SEC27	chrVII_252720_T_C_24104	-0.0351754	1.17813	0.57235	FALSE
YGL140C	YGL140C	chrVII_242628_T_C_24076	0.104955	2.23438	0.182069	FALSE
YGL141W	HUL5	chrVII_242628_T_C_24076	-0.0725798	1.46389	0.437204	FALSE
YGL142C	GPI10	chrVII_232352_G_A_24032	0.093569	0.661686	0.804578	FALSE
YGL143C	MRF1	chrVII_232352_G_A_24032	0.04112	1.1761	0.57325	FALSE
YGL144C	ROG1	chrVII_232352_G_A_24032	-0.0839874	1.82994	0.294463	FALSE
YGL145W	TIP20	chrVII_232352_G_A_24032	0.0480023	1.54034	0.404091	FALSE
YGL146C	RRT6	chrVII_226965_T_C_24005	0.19593	1.493	0.424338	FALSE
YGL147C	RPL9A	chrVII_226965_T_C_24005	0.0214172	2.66511	0.103255	FALSE
YGL148W	ARO2	chrVII_226965_T_C_24005	0.0828499	6.11474	0.00141343	FALSE
YGL151W	NUT1	chrVII_216966_C_T_23969	0.0668384	0.88473	0.704971	FALSE
YGL153W	PEX14	chrVII_216966_C_T_23969	-0.0181361	1.60917	0.379212	FALSE
YGL154C	LYS5	chrVII_215125_T_C_23967	-0.122631	1.51203	0.417303	FALSE
YGL155W	CDC43	chrVII_215125_T_C_23967	-0.095174	1.61294	0.37797	FALSE
YGL156W	AMS1	chrVII_209977_C_T_23953	-0.088724	1.61563	0.377136	FALSE
YGL157W	ARI1	chrVII_209977_C_T_23953	0.221654	11.9487	0	FALSE
YGL159W	YGL159W	chrVII_199203_C_T_23904	0.0428606	1.68275	0.350584	FALSE
YGL160W	AIM14	chrVII_199203_C_T_23904	0.0185547	0.608557	0.8295	FALSE
YGL161C	YIP5	chrVII_199203_C_T_23904	-0.296359	44.2611	0	FALSE
YGL162W	SUT1	chrVII_199203_C_T_23904	-0.157523	0.77677	0.750673	FALSE
YGL164C	YRB30	chrVII_191826_A_T_23834	-0.057871	1.85885	0.28767	FALSE
YGL166W	CUP2	chrVII_191826_A_T_23834	0.0683877	2.12874	0.209202	FALSE
YGL167C	PMR1	chrVII_187246_A_G_23805	-0.00444999	1.13773	0.589213	FALSE
YGL169W	SUA5	chrVII_187246_A_G_23805	0.179014	7.85776	0.000609756	FALSE
YGL173C	XRN1	chrVII_175645_T_A_23747	0.0271972	1.3712	0.482493	FALSE
YGL174W	BUD13	chrVII_175645_T_A_23747	-0.188634	3.80988	0.019979	FALSE
YGL175C	SAE2	chrVII_175645_T_A_23747	0.0319964	0.512628	0.871472	FALSE
YGL176C	YGL176C	chrVII_175645_T_A_23747	0.21676	5.65974	0.00201681	FALSE
YGL178W	MPT5	chrVII_175645_T_A_23747	0.0032797	0.76741	0.755288	FALSE
YGL179C	TOS3	chrVII_159045_G_A_23645	-0.234198	4.76228	0.00459459	FALSE
YGL180W	ATG1	chrVII_159045_G_A_23645	0.327889	4.97123	0.00335664	FALSE
YGL181W	GTS1	chrVII_159045_G_A_23645	0.390578	62.1496	0	FALSE
YGL185C	YGL185C	chrVII_153186_T_C_23586	0.322897	11.0629	0	FALSE
YGL186C	TPN1	chrVII_153186_T_C_23586	-0.264479	24.609	0	FALSE
YGL187C	COX4	chrVII_153186_T_C_23586	0.0100333	0.965374	0.671623	FALSE
YGL188C	YGL188C	chrVII_153186_T_C_23586	0.128106	0.993064	0.658116	FALSE
YGL188C-A	YGL188C-A	chrVII_145053_A_G_23487	-0.607355	5.34107	0.00280374	FALSE
YGL189C	RPS26A	chrVII_145053_A_G_23487	-0.00183662	1.94652	0.260238	FALSE
YGL190C	CDC55	chrVII_145053_A_G_23487	0.0329025	1.27587	0.530325	FALSE
YGL191W	COX13	chrVII_145053_A_G_23487	-0.0968721	11.0122	0	FALSE
YGL192W	IME4	chrVII_145053_A_G_23487	-0.021528	0.695001	0.789917	FALSE
YGL193C	YGL193C	chrVII_139707_A_C_23433	0.235907	2.93476	0.0676652	FALSE
YGL194C	HOS2	chrVII_139707_A_C_23433	-0.0661876	0.81136	0.735763	FALSE
YGL194C-A	YGL194C-A	chrVII_139707_A_C_23433	-0.368217	20.3802	0	FALSE
YGL195W	GCN1	chrVII_139707_A_C_23433	-0.0566593	3.819	0.019979	FALSE
YGL196W	DSD1	chrVII_124322_C_T_23315	0.109884	4.15053	0.0127387	FALSE
YGL197W	MDS3	chrVII_124322_C_T_23315	-0.14965	3.32287	0.0399172	FALSE
YGL198W	YIP4	chrVII_124322_C_T_23315	-0.0134146	0.814276	0.73484	FALSE
YGL201C	MCM6	chrVII_117824_A_T_23288	0.0346472	0.786723	0.746663	FALSE
YGL202W	ARO8	chrVII_117824_A_T_23288	0.0952741	7.99388	0.000609756	FALSE
YGL203C	KEX1	chrVII_117824_A_T_23288	-0.0343264	1.30421	0.51701	FALSE
YGL204C	YGL204C	chrVII_117824_A_T_23288	-0.444773	4.14905	0.0127669	FALSE
YGL205W	POX1	chrVII_102109_G_A_23204	-0.251903	2.21509	0.187258	FALSE
YGL206C	CHC1	chrVII_102109_G_A_23204	0.131659	6.53038	0.000821355	FALSE
YGL207W	SPT16	chrVII_102109_G_A_23204	0.0276521	1.02028	0.643157	FALSE
YGL211W	NCS6	chrVII_93435_C_T_23161	0.0494195	1.19154	0.567143	FALSE
YGL212W	VAM7	chrVII_93435_C_T_23161	0.193427	3.68075	0.023136	FALSE
YGL213C	SKI8	chrVII_93435_C_T_23161	-0.0262572	1.06284	0.624279	FALSE
YGL215W	CLG1	chrVII_93435_C_T_23161	0.00213668	1.54257	0.403285	FALSE
YGL216W	KIP3	chrVII_81639_C_T_23116	-0.0933698	2.76366	0.0873267	FALSE
YGL217C	YGL217C	chrVII_81639_C_T_23116	0.83319	17.6793	0	FALSE
YGL219C	MDM34	chrVII_81639_C_T_23116	0.0341978	1.27118	0.531849	FALSE
YGL220W	BOL2	chrVII_81639_C_T_23116	-0.00588153	2.28473	0.170747	FALSE
YGL221C	NIF3	chrVII_81639_C_T_23116	-0.0653845	1.74255	0.322188	FALSE
YGL222C	EDC1	chrVII_81639_C_T_23116	-0.231974	7.26519	0.000609756	FALSE
YGL223C	COG1	chrVII_78291_T_C_23107	-0.405606	9.51865	0.000609756	FALSE
YGL224C	SDT1	chrVII_78291_T_C_23107	-0.0722182	1.57471	0.392048	FALSE
YGL225W	VRG4	chrVII_78291_T_C_23107	-0.0236604	0.635367	0.816006	FALSE
YGL226C-A	OST5	chrVII_73336_G_A_23061	0.030838	1.60614	0.380423	FALSE
YGL226W	MTC3	chrVII_73336_G_A_23061	0.215649	13.0053	0	FALSE
YGL227W	VID30	chrVII_70353_C_T_23051	-0.00286775	0.161522	0.989173	FALSE
YGL228W	SHE10	chrVII_70353_C_T_23051	0.00128096	0.440983	0.903141	FALSE
YGL229C	SAP4	chrVII_62921_A_G_23018	-0.0699903	1.22398	0.55391	FALSE
YGL231C	EMC4	chrVII_62921_A_G_23018	-0.0354656	2.22701	0.184098	FALSE
YGL232W	TAN1	chrVII_62921_A_G_23018	0.0864734	2.38521	0.151263	FALSE
YGL233W	SEC15	chrVII_62921_A_G_23018	-0.0308151	1.91601	0.268422	FALSE
YGL234W	ADE5,7	chrVII_57465_T_C_22993	0.000905836	0.741724	0.76685	FALSE
YGL236C	MTO1	chrVII_57465_T_C_22993	-0.104501	2.84061	0.0782858	FALSE
YGL237C	HAP2	chrVII_57465_T_C_22993	-0.0605097	1.98543	0.247898	FALSE
YGL238W	CSE1	chrVII_57465_T_C_22993	-0.0284413	1.82142	0.296609	FALSE
YGL241W	KAP114	chrVII_42016_A_G_22910	-0.0131521	1.32909	0.504426	FALSE
YGL242C	YGL242C	chrVII_42016_A_G_22910	-0.12518	5.06205	0.00301205	FALSE
YGL243W	TAD1	chrVII_42016_A_G_22910	-0.364193	11.4477	0	FALSE
YGL244W	RTF1	chrVII_42016_A_G_22910	-0.0514594	3.31325	0.0400722	FALSE
YGL246C	RAI1	chrVII_37581_T_C_22872	-0.200505	9.71556	0.000609756	FALSE
YGL247W	BRR6	chrVII_37581_T_C_22872	-0.117231	1.92132	0.266786	FALSE
YGL251C	HFM1	chrVII_28288_T_C_22816	-0.169458	1.32811	0.504873	FALSE
YGL252C	RTG2	chrVII_28288_T_C_22816	-0.113797	5.27796	0.00301205	FALSE
YGL253W	HXK2	chrVII_28288_T_C_22816	0.0497984	4.01341	0.0156387	FALSE
YGL255W	ZRT1	chrVII_28288_T_C_22816	0.0381981	6.43966	0.000821355	FALSE
YGL256W	ADH4	chrVII_12415_A_G_22712	0.00767698	0.176015	0.987736	FALSE
YGL257C	MNT2	chrVII_12415_A_G_22712	-0.0956369	2.47901	0.134541	FALSE
YGL258W	VEL1	chrVII_12415_A_G_22712	0.0540824	0.434663	0.905428	FALSE
YGL263W	COS12	chrVII_12415_A_G_22712	0.041187	0.722035	0.777311	FALSE
YGR001C	EFM5	chrVII_496768_C_G_25597	-0.00222398	0.137867	0.991942	FALSE
YGR002C	SWC4	chrVII_496768_C_G_25597	0.0155092	1.81783	0.297971	FALSE
YGR003W	CUL3	chrVII_504554_G_T_25654	-0.224275	3.64091	0.0250336	FALSE
YGR004W	PEX31	chrVII_504554_G_T_25654	0.179234	2.34282	0.158159	FALSE
YGR005C	TFG2	chrVII_504554_G_T_25654	0.0919609	3.90031	0.0193757	FALSE
YGR007W	ECT1	chrVII_508201_T_C_25668	0.0302862	0.879672	0.707271	FALSE
YGR008C	STF2	chrVII_508201_T_C_25668	0.12146	14.0507	0	FALSE
YGR010W	NMA2	chrVII_512812_T_C_25682	-0.0470857	0.93198	0.68345	FALSE
YGR011W	YGR011W	chrVII_512812_T_C_25682	-0.358696	21.0008	0	FALSE
YGR014W	MSB2	chrVII_520898_A_G_25727	0.0339955	0.706134	0.784642	FALSE
YGR015C	YGR015C	chrVII_520898_A_G_25727	-0.0937882	1.56188	0.397449	FALSE
YGR025W	YGR025W	chrVII_533328_A_G_25799	-0.100886	0.377609	0.92886	FALSE
YGR026W	YGR026W	chrVII_533328_A_G_25799	0.0873161	3.82793	0.019962	FALSE
YGR028W	MSP1	chrVII_544385_T_C_25823	0.0201826	0.909259	0.694748	FALSE
YGR029W	ERV1	chrVII_544385_T_C_25823	-0.0359773	2.49263	0.13194	FALSE
YGR034W	RPL26B	chrVII_556822_C_G_25905	-0.00478197	0.727222	0.774444	FALSE
YGR035C	YGR035C	chrVII_556822_C_G_25905	0.150378	1.26266	0.536023	FALSE
YGR036C	CAX4	chrVII_559210_G_A_25922	-0.767789	10.4024	0.000609756	FALSE
YGR037C	ACB1	chrVII_559210_G_A_25922	0.0237937	2.32581	0.161114	FALSE
YGR038W	ORM1	chrVII_559210_G_A_25922	0.0560713	2.47024	0.135463	FALSE
YGR041W	BUD9	chrVII_580283_G_A_26011	0.278188	5.34742	0.00280374	FALSE
YGR042W	MTE1	chrVII_580283_G_A_26011	-0.314138	16.2885	0	FALSE
YGR043C	NQM1	chrVII_580283_G_A_26011	0.522456	55.7124	0	FALSE
YGR046W	TAM41	chrVII_586878_T_C_26049	0.00452798	1.00375	0.651823	FALSE
YGR047C	TFC4	chrVII_586878_T_C_26049	0.0263046	0.875954	0.70842	FALSE
YGR048W	UFD1	chrVII_592013_T_C_26072	0.127187	5.46443	0.00253165	FALSE
YGR049W	SCM4	chrVII_592013_T_C_26072	-0.119708	3.31072	0.0400993	FALSE
YGR050C	YGR050C	chrVII_592013_T_C_26072	-0.265777	5.85975	0.00141343	FALSE
YGR052W	FMP48	chrVII_594510_A_T_26095	-0.609905	30.6844	0	FALSE
YGR053C	YGR053C	chrVII_594510_A_T_26095	-0.239993	2.65656	0.104016	FALSE
YGR054W	YGR054W	chrVII_598477_T_C_26129	-0.0496764	1.41534	0.460279	FALSE
YGR055W	MUP1	chrVII_598477_T_C_26129	0.0427869	5.26631	0.00301205	FALSE
YGR056W	RSC1	chrVII_598477_T_C_26129	-0.0326337	1.4153	0.460298	FALSE
YGR057C	LST7	chrVII_609250_A_C_26198	0.207794	1.29741	0.520491	FALSE
YGR058W	PEF1	chrVII_609250_A_C_26198	-0.033683	1.90585	0.271876	FALSE
YGR062C	COX18	chrVII_618236_C_A_26242	0.117237	1.49597	0.423409	FALSE
YGR063C	SPT4	chrVII_618236_C_A_26242	0.0685515	2.64355	0.105793	FALSE
YGR065C	VHT1	chrVII_618236_C_A_26242	-0.426222	155.922	0	FALSE
YGR066C	YGR066C	chrVII_618236_C_A_26242	-0.073406	1.07093	0.620298	FALSE
YGR070W	ROM1	chrVII_631282_C_T_26332	-0.0517646	2.17005	0.198953	FALSE
YGR071C	ENV11	chrVII_631282_C_T_26332	0.0576355	1.71102	0.336927	FALSE
YGR073C	YGR073C	chrVII_636162_G_A_26365	-0.0117553	0.303639	0.954188	FALSE
YGR074W	SMD1	chrVII_636162_G_A_26365	-0.0195043	2.35093	0.156874	FALSE
YGR084C	MRP13	chrVII_648839_A_G_26417	0.0227071	1.04444	0.632473	FALSE
YGR085C	RPL11B	chrVII_648839_A_G_26417	-0.0172426	2.63438	0.107606	FALSE
YGR086C	PIL1	chrVII_648839_A_G_26417	0.0617217	9.12319	0.000609756	FALSE
YGR088W	CTT1	chrVII_653026_T_A_26461	-0.254506	2.80778	0.0808395	FALSE
YGR089W	NNF2	chrVII_653026_T_A_26461	-0.0690145	1.97974	0.250156	FALSE
YGR090W	UTP22	chrVII_667843_G_A_26587	0.00711127	1.02573	0.641048	FALSE
YGR091W	PRP31	chrVII_667843_G_A_26587	0.114794	1.33691	0.499746	FALSE
YGR093W	DRN1	chrVII_672392_G_A_26617	0.0106338	0.106526	0.99566	FALSE
YGR094W	VAS1	chrVII_672392_G_A_26617	-0.0637283	5.01306	0.00335664	FALSE
YGR100W	MDR1	chrVII_694539_C_T_26743	-0.0395134	1.46101	0.43851	FALSE
YGR101W	PCP1	chrVII_694539_C_T_26743	0.00665995	2.09128	0.217595	FALSE
YGR102C	GTF1	chrVII_694539_C_T_26743	-0.0720139	5.22322	0.00301205	FALSE
YGR104C	SRB5	chrVII_696994_T_C_26754	0.0487315	0.691786	0.791368	FALSE
YGR105W	VMA21	chrVII_696994_T_C_26754	-0.0526654	1.74194	0.322401	FALSE
YGR107W	YGR107W	chrVII_703857_T_G_26794	-0.263595	1.5196	0.41487	FALSE
YGR108W	CLB1	chrVII_703857_T_G_26794	-0.138084	4.11949	0.0138509	FALSE
YGR110W	CLD1	chrVII_715893_A_G_26855	-0.0253212	1.93019	0.264588	FALSE
YGR111W	YGR111W	chrVII_715893_A_G_26855	-0.00233648	1.02798	0.640177	FALSE
YGR118W	RPS23A	chrVII_727958_T_C_26949	-0.0134651	2.26251	0.175748	FALSE
YGR119C	NUP57	chrVII_727958_T_C_26949	0.0108581	0.574595	0.843016	FALSE
YGR120C	COG2	chrVII_729983_T_C_26958	0.364954	19.8569	0	FALSE
YGR121C	MEP1	chrVII_729983_T_C_26958	-0.0672138	4.09997	0.0144495	FALSE
YGR121W-A	YGR121W-A	chrVII_735294_A_G_27009	-0.0495664	0.805269	0.737607	FALSE
YGR122W	YGR122W	chrVII_735294_A_G_27009	0.172928	1.66749	0.35555	FALSE
YGR125W	YGR125W	chrVII_745446_G_A_27105	0.0177579	1.24363	0.545957	FALSE
YGR126W	YGR126W	chrVII_745446_G_A_27105	0.154287	1.8033	0.303059	FALSE
YGR127W	YGR127W	chrVII_747874_A_G_27135	-0.115551	1.7855	0.308825	FALSE
YGR128C	UTP8	chrVII_747874_A_G_27135	-0.0526619	0.873882	0.709059	FALSE
YGR129W	SYF2	chrVII_751927_C_T_27169	0.0392559	0.934628	0.682497	FALSE
YGR130C	YGR130C	chrVII_751927_C_T_27169	-0.0780445	6.53045	0.000821355	FALSE
YGR132C	PHB1	chrVII_755549_T_A_27197	-0.0632106	1.87805	0.282793	FALSE
YGR133W	PEX4	chrVII_755549_T_A_27197	0.00917296	0.224348	0.97864	FALSE
YGR138C	TPO2	chrVII_764689_A_G_27230	0.0641261	3.9661	0.0173497	FALSE
YGR140W	CBF2	chrVII_764689_A_G_27230	0.153827	3.37031	0.0366497	FALSE
YGR141W	VPS62	chrVII_764689_A_G_27230	0.0452573	0.830665	0.727783	FALSE
YGR142W	BTN2	chrVII_780206_C_G_27349	0.0197645	0.584869	0.839022	FALSE
YGR143W	SKN1	chrVII_780206_C_G_27349	0.161116	1.07794	0.61615	FALSE
YGR144W	THI4	chrVII_780206_C_G_27349	0.140837	1.77017	0.313834	FALSE
YGR146C-A	YGR146C-A	chrVII_786108_A_G_27390	-0.0866425	0.585135	0.838958	FALSE
YGR147C	NAT2	chrVII_786108_A_G_27390	0.0290431	2.54526	0.121901	FALSE
YGR148C	RPL24B	chrVII_786108_A_G_27390	0.0322696	9.20509	0.000609756	FALSE
YGR149W	GPC1	chrVII_786108_A_G_27390	-0.122581	2.47383	0.135085	FALSE
YGR150C	CCM1	chrVII_794620_C_T_27476	0.101195	1.2827	0.52723	FALSE
YGR151C	YGR151C	chrVII_794620_C_T_27476	0.150383	4.00217	0.015981	FALSE
YGR152C	RSR1	chrVII_794620_C_T_27476	0.0765727	1.47954	0.429508	FALSE
YGR154C	GTO1	chrVII_798399_T_C_27504	-0.138844	3.60145	0.0261608	FALSE
YGR155W	CYS4	chrVII_798399_T_C_27504	0.0435428	4.57567	0.00645995	FALSE
YGR157W	CHO2	chrVII_805202_G_A_27548	0.111465	16.1352	0	FALSE
YGR158C	MTR3	chrVII_805202_G_A_27548	-0.0799947	2.29872	0.167205	FALSE
YGR159C	NSR1	chrVII_808622_T_C_27582	0.0272137	3.40387	0.0345327	FALSE
YGR161C	RTS3	chrVII_808622_T_C_27582	0.290399	9.72766	0.000609756	FALSE
YGR162W	TIF4631	chrVII_825141_T_A_27614	0.00731405	0.192063	0.98532	FALSE
YGR163W	GTR2	chrVII_825141_T_A_27614	-0.0685574	3.78083	0.0204342	FALSE
YGR165W	MRPS35	chrVII_825141_T_A_27614	0.0412627	1.15553	0.581503	FALSE
YGR166W	TRS65	chrVII_825141_T_A_27614	-0.0856976	0.80448	0.737843	FALSE
YGR167W	CLC1	chrVII_825141_T_A_27614	-0.0287307	1.10131	0.60568	FALSE
YGR168C	YGR168C	chrVII_825141_T_A_27614	0.107077	1.14893	0.583481	FALSE
YGR169C	PUS6	chrVII_843717_T_C_27723	-0.172179	2.38876	0.150778	FALSE
YGR169C-A	LSO2	chrVII_843717_T_C_27723	-0.0636834	3.15811	0.0475461	FALSE
YGR170W	PSD2	chrVII_843717_T_C_27723	-0.14357	3.56516	0.0275749	FALSE
YGR171C	MSM1	chrVII_843717_T_C_27723	-0.166375	1.8141	0.299703	FALSE
YGR172C	YIP1	chrVII_843717_T_C_27723	0.0822979	3.56194	0.0277822	FALSE
YGR174W-A	YGR174W-A	chrVII_846611_T_G_27746	-0.0846398	3.11974	0.0501554	FALSE
YGR175C	ERG1	chrVII_846611_T_G_27746	0.0601877	3.52361	0.0298119	FALSE
YGR177C	ATF2	chrVII_849571_C_G_27777	0.671771	42.4974	0	FALSE
YGR178C	PBP1	chrVII_849571_C_G_27777	0.12169	7.99865	0.000609756	FALSE
YGR179C	OKP1	chrVII_855417_G_A_27834	0.0118932	1.56531	0.396064	FALSE
YGR180C	RNR4	chrVII_855417_G_A_27834	-0.0134969	0.441331	0.903043	FALSE
YGR181W	TIM13	chrVII_859016_A_G_27866	0.0975322	4.39739	0.0081381	FALSE
YGR182C	YGR182C	chrVII_859016_A_G_27866	-0.0834187	0.762297	0.757281	FALSE
YGR183C	QCR9	chrVII_859016_A_G_27866	0.0677594	3.78549	0.020203	FALSE
YGR185C	TYS1	chrVII_868670_G_A_27951	-0.0103326	1.05342	0.628459	FALSE
YGR186W	TFG1	chrVII_868670_G_A_27951	-0.0336844	0.883795	0.705406	FALSE
YGR187C	HGH1	chrVII_868670_G_A_27951	-0.0278813	0.891673	0.701739	FALSE
YGR188C	BUB1	chrVII_877412_T_C_28002	0.0397796	0.791101	0.744846	FALSE
YGR189C	CRH1	chrVII_877412_T_C_28002	0.110389	3.26232	0.0415272	FALSE
YGR193C	PDX1	chrVII_886112_C_T_28099	0.0786748	2.26106	0.176065	FALSE
YGR194C	XKS1	chrVII_886112_C_T_28099	0.0717554	2.32029	0.162518	FALSE
YGR195W	SKI6	chrVII_889484_G_A_28122	0.0359495	0.447342	0.901341	FALSE
YGR196C	FYV8	chrVII_889484_G_A_28122	0.00237422	1.15129	0.582583	FALSE
YGR197C	SNG1	chrVII_894617_A_T_28144	0.0766709	1.69771	0.343706	FALSE
YGR198W	YPP1	chrVII_894617_A_T_28144	0.00720348	1.38629	0.475657	FALSE
YGR199W	PMT6	chrVII_899755_T_C_28160	0.0851775	2.09515	0.217199	FALSE
YGR200C	ELP2	chrVII_899755_T_C_28160	0.160916	5.09483	0.00301205	FALSE
YGR202C	PCT1	chrVII_904491_G_A_28175	-0.0189525	4.51582	0.00681818	TRUE
YGR203W	YCH1	chrVII_904491_G_A_28175	0.0660277	1.28823	0.523636	FALSE
YGR206W	MVB12	chrVII_910689_A_G_28201	0.0345779	0.776153	0.751001	FALSE
YGR207C	CIR1	chrVII_910689_A_G_28201	-0.0124628	0.830915	0.72772	FALSE
YGR208W	SER2	chrVII_913222_G_A_28209	0.00482648	0.410471	0.915769	FALSE
YGR209C	TRX2	chrVII_913222_G_A_28209	-0.00516669	0.591703	0.837074	FALSE
YGR210C	YGR210C	chrVII_913222_G_A_28209	0.0606012	1.63979	0.368308	FALSE
YGR211W	ZPR1	chrVII_915057_C_T_28218	0.0760835	2.6941	0.0977009	FALSE
YGR212W	SLI1	chrVII_915057_C_T_28218	-0.364884	2.17899	0.196784	FALSE
YGR214W	RPS0A	chrVII_922632_G_A_28253	0.0225386	1.57258	0.393008	FALSE
YGR215W	RSM27	chrVII_922632_G_A_28253	0.0881045	6.15365	0.00107914	TRUE
YGR216C	GPI1	chrVII_922632_G_A_28253	0.244712	5.65796	0.00201681	FALSE
YGR217W	CCH1	chrVII_922632_G_A_28253	-0.0348889	0.998462	0.654808	FALSE
YGR218W	CRM1	chrVII_938241_T_C_28288	-0.0216671	1.19316	0.566446	FALSE
YGR220C	MRPL9	chrVII_938241_T_C_28288	-0.0254424	0.626685	0.819048	FALSE
YGR221C	TOS2	chrVII_938241_T_C_28288	-0.0728332	2.66233	0.103551	FALSE
YGR222W	PET54	chrVII_940722_C_T_28307	0.0241918	0.894802	0.700278	FALSE
YGR223C	HSV2	chrVII_940722_C_T_28307	0.0590574	1.13778	0.58919	FALSE
YGR227W	DIE2	chrVII_952348_G_A_28387	0.00950705	1.81801	0.297888	FALSE
YGR229C	SMI1	chrVII_952348_G_A_28387	-0.268991	11.49	0	FALSE
YGR230W	BNS1	chrVII_952348_G_A_28387	0.245145	9.19227	0.000609756	FALSE
YGR231C	PHB2	chrVII_952348_G_A_28387	-0.0787946	3.02063	0.0581807	FALSE
YGR232W	NAS6	chrVII_954681_T_C_28412	0.0165019	1.34785	0.493205	FALSE
YGR233C	PHO81	chrVII_954681_T_C_28412	-0.532173	27.5024	0	FALSE
YGR234W	YHB1	chrVII_961272_T_C_28486	-0.57773	5.3618	0.00280374	FALSE
YGR235C	MIC26	chrVII_961272_T_C_28486	-0.288313	27.7821	0	FALSE
YGR238C	KEL2	chrVII_970801_C_T_28543	0.0996839	2.20481	0.190082	FALSE
YGR239C	PEX21	chrVII_970801_C_T_28543	-0.290612	13.7167	0	FALSE
YGR240C	PFK1	chrVII_970801_C_T_28543	0.108035	10.812	0	FALSE
YGR241C	YAP1802	chrVII_977494_A_G_28584	-0.0850479	1.78289	0.309692	FALSE
YGR243W	MPC3	chrVII_977494_A_G_28584	0.0363215	1.14958	0.583132	FALSE
YGR244C	LSC2	chrVII_977494_A_G_28584	0.0240759	3.23445	0.0433483	FALSE
YGR245C	SDA1	chrVII_977494_A_G_28584	-0.0694402	2.41276	0.146829	FALSE
YGR246C	BRF1	chrVII_986691_T_A_28623	0.0280577	1.15172	0.582472	FALSE
YGR247W	CPD1	chrVII_986691_T_A_28623	0.217201	4.71039	0.00499039	FALSE
YGR248W	SOL4	chrVII_986691_T_A_28623	0.0704793	1.18637	0.569154	FALSE
YGR250C	RIE1	chrVII_996630_A_G_28727	0.230455	4.92458	0.00335664	FALSE
YGR251W	NOP19	chrVII_996630_A_G_28727	-0.287739	13.6291	0	FALSE
YGR253C	PUP2	chrVII_998685_A_T_28733	-0.0480798	2.61494	0.110613	FALSE
YGR254W	ENO1	chrVII_998685_A_T_28733	0.0586549	11.4076	0	FALSE
YGR255C	COQ6	chrVII_1006107_T_C_28758	0.012023	0.805134	0.737648	FALSE
YGR256W	GND2	chrVII_1006107_T_C_28758	0.407525	20.1524	0	FALSE
YGR257C	MTM1	chrVII_1006107_T_C_28758	0.0445009	1.32482	0.506361	FALSE
YGR261C	APL6	chrVII_1016816_T_C_28840	-0.170618	5.22237	0.00301205	FALSE
YGR262C	BUD32	chrVII_1016816_T_C_28840	-0.0123103	2.65693	0.103992	FALSE
YGR263C	SAY1	chrVII_1016816_T_C_28840	0.0226234	0.437649	0.904304	FALSE
YGR264C	MES1	chrVII_1023336_A_G_28868	-0.0226824	0.511544	0.871896	FALSE
YGR266W	YGR266W	chrVII_1023336_A_G_28868	0.0219112	0.882465	0.706024	FALSE
YGR267C	FOL2	chrVII_1023336_A_G_28868	0.0145431	2.13421	0.207948	FALSE
YGR268C	HUA1	chrVII_1023336_A_G_28868	-0.0656322	0.786491	0.746742	FALSE
YGR270W	YTA7	chrVII_1023336_A_G_28868	-0.0741688	2.24103	0.180099	FALSE
YGR271C-A	EFG1	chrVII_1048909_A_G_28946	-0.0260267	1.53504	0.406667	FALSE
YGR271W	SLH1	chrVII_1023336_A_G_28868	-0.00453112	0.973039	0.668025	FALSE
YGR274C	TAF1	chrVII_1048909_A_G_28946	-0.0384912	0.835759	0.726493	FALSE
YGR275W	RTT102	chrVII_1048909_A_G_28946	0.314164	24.4768	0	FALSE
YGR276C	RNH70	chrVII_1048909_A_G_28946	0.26634	6.7146	0.000821355	FALSE
YGR277C	CAB4	chrVII_1048909_A_G_28946	0.0203188	1.05327	0.628525	FALSE
YGR278W	CWC22	chrVII_1048909_A_G_28946	-0.224365	3.10431	0.051488	FALSE
YGR279C	SCW4	chrVII_1048909_A_G_28946	0.00509531	0.352873	0.938792	FALSE
YGR280C	PXR1	chrVII_1050122_T_C_28949	-0.0327253	0.942915	0.679638	FALSE
YGR281W	YOR1	chrVII_1050122_T_C_28949	0.0117575	0.597674	0.834543	FALSE
YGR282C	BGL2	chrVII_1050122_T_C_28949	0.00504519	1.38819	0.475008	FALSE
YGR283C	YGR283C	chrVII_1067857_G_A_29047	-0.0408382	0.585626	0.838841	FALSE
YGR284C	ERV29	chrVII_1067857_G_A_29047	0.000926194	0.681021	0.794987	FALSE
YGR285C	ZUO1	chrVII_1067857_G_A_29047	-0.00707805	1.46609	0.436205	FALSE
YGR286C	BIO2	chrVII_1067857_G_A_29047	0.451168	20.3813	0	FALSE
YGR287C	IMA1	chrVII_1067857_G_A_29047	-0.237772	6.30534	0.000821355	TRUE
YGR292W	MAL12	chrVII_1082514_C_T_29111	-0.796387	5.09201	0.00301205	FALSE
YGR295C	COS6	chrVII_1082514_C_T_29111	0.276326	3.44446	0.0327308	FALSE
YHL001W	RPL14B	chrVIII_103046_A_G_29820	-0.0773958	16.1786	0	FALSE
YHL002W	HSE1	chrVIII_103046_A_G_29820	0.00927332	0.471236	0.889704	FALSE
YHL003C	LAG1	chrVIII_103046_A_G_29820	0.0878694	3.60482	0.0260538	FALSE
YHL004W	MRP4	chrVIII_103046_A_G_29820	0.155258	4.43702	0.00724095	FALSE
YHL006C	SHU1	chrVIII_95107_G_A_29784	-0.202715	1.5566	0.399018	FALSE
YHL007C	STE20	chrVIII_95107_G_A_29784	-0.00780304	1.98369	0.248596	FALSE
YHL008C	YHL008C	chrVIII_92343_C_A_29743	-0.763152	19.2521	0	FALSE
YHL009C	YAP3	chrVIII_92343_C_A_29743	-0.0881054	0.890201	0.702426	FALSE
YHL010C	ETP1	chrVIII_76139_G_A_29689	-0.0286337	1.03518	0.636866	FALSE
YHL011C	PRS3	chrVIII_76139_G_A_29689	0.0310716	1.50845	0.418603	FALSE
YHL013C	OTU2	chrVIII_76139_G_A_29689	0.00550072	0.189749	0.985514	FALSE
YHL014C	YLF2	chrVIII_76139_G_A_29689	-0.410683	8.03681	0.000609756	FALSE
YHL015W	RPS20	chrVIII_76139_G_A_29689	-0.312301	187.37	0	FALSE
YHL016C	DUR3	chrVIII_72104_G_A_29659	-1.8175	267.147	0	FALSE
YHL017W	YHL017W	chrVIII_72104_G_A_29659	-0.0401124	1.19431	0.56595	FALSE
YHL018W	YHL018W	chrVIII_67971_C_T_29638	-0.292405	2.54391	0.12227	FALSE
YHL019C	APM2	chrVIII_67971_C_T_29638	0.137139	3.79132	0.019979	FALSE
YHL019W-A	YHL019W-A	chrVIII_67971_C_T_29638	0.143655	1.32288	0.507239	FALSE
YHL020C	OPI1	chrVIII_67971_C_T_29638	-0.172	31.7875	0	FALSE
YHL021C	AIM17	chrVIII_67971_C_T_29638	0.109611	0.98591	0.661962	FALSE
YHL023C	NPR3	chrVIII_67971_C_T_29638	-0.00479893	0.222449	0.979	FALSE
YHL024W	RIM4	chrVIII_53107_A_G_29553	0.143198	1.95547	0.257834	FALSE
YHL025W	SNF6	chrVIII_53107_A_G_29553	-0.0816038	2.94282	0.0668343	FALSE
YHL026C	YHL026C	chrVIII_53107_A_G_29553	0.143303	3.12213	0.0499106	FALSE
YHL027W	RIM101	chrVIII_53107_A_G_29553	0.0278193	0.603817	0.831747	FALSE
YHL028W	WSC4	chrVIII_48147_C_T_29495	0.0694413	1.48011	0.429226	FALSE
YHL029C	OCA5	chrVIII_48147_C_T_29495	0.0940821	2.19175	0.192707	FALSE
YHL030W	ECM29	chrVIII_48147_C_T_29495	0.103766	1.90775	0.271197	FALSE
YHL031C	GOS1	chrVIII_35854_C_A_29398	0.182023	11.8794	0	FALSE
YHL032C	GUT1	chrVIII_35854_C_A_29398	-0.103677	1.69111	0.346678	FALSE
YHL033C	RPL8A	chrVIII_35854_C_A_29398	0.0987447	38.8229	0	FALSE
YHL034C	SBP1	chrVIII_33927_C_G_29388	-0.00578306	0.349862	0.939963	FALSE
YHL034W-A	YHL034W-A	chrVIII_33927_C_G_29388	-0.115296	0.162291	0.989164	FALSE
YHL035C	VMR1	chrVIII_27996_T_G_29350	-0.224313	37.9194	0	FALSE
YHL036W	MUP3	chrVIII_27996_T_G_29350	-0.0991034	4.39428	0.0081381	FALSE
YHL038C	CBP2	chrVIII_24334_A_G_29322	-0.0677887	0.434049	0.905659	FALSE
YHL039W	EFM1	chrVIII_24334_A_G_29322	-0.254404	10.3548	0.000609756	FALSE
YHL040C	ARN1	chrVIII_19706_C_A_29279	-0.203771	28.958	0	FALSE
YHL044W	YHL044W	chrVIII_19706_C_A_29279	1.22399	15.9175	0	FALSE
YHL047C	ARN2	chrVIII_1028_T_A_29142	1.11151	1018.69	0	TRUE
YHL048W	COS8	chrVIII_1028_T_A_29142	0.252806	1.88955	0.277423	FALSE
YHR001W-A	QCR10	chrVIII_108134_C_T_29863	-0.0558716	2.79662	0.0827717	FALSE
YHR002W	LEU5	chrVIII_108134_C_T_29863	-0.0306399	2.79621	0.0828536	FALSE
YHR003C	TCD1	chrVIII_108134_C_T_29863	0.106334	3.69586	0.0229032	FALSE
YHR004C	NEM1	chrVIII_115855_T_C_29887	0.0213242	1.0462	0.631671	FALSE
YHR005C	GPA1	chrVIII_115855_T_C_29887	0.134043	12.5483	0	FALSE
YHR005C-A	TIM10	chrVIII_115855_T_C_29887	0.0462111	5.29321	0.00280374	FALSE
YHR006W	STP2	chrVIII_119938_T_C_29928	0.0223945	0.657164	0.80652	FALSE
YHR007C	ERG11	chrVIII_119938_T_C_29928	-0.0209958	1.86638	0.285638	FALSE
YHR009C	TDA3	chrVIII_123980_A_G_29943	0.485899	57.4944	0	FALSE
YHR010W	RPL27A	chrVIII_123980_A_G_29943	0.00279472	1.1095	0.60324	FALSE
YHR011W	DIA4	chrVIII_130538_T_C_29981	-0.0360719	2.11039	0.213165	FALSE
YHR012W	VPS29	chrVIII_130538_T_C_29981	0.098914	3.91198	0.0193024	FALSE
YHR013C	ARD1	chrVIII_130538_T_C_29981	-0.0486211	1.95533	0.257867	FALSE
YHR016C	YSC84	chrVIII_139344_T_A_30025	0.0410394	0.93964	0.680692	FALSE
YHR017W	YSC83	chrVIII_139344_T_A_30025	-0.00256631	0.608135	0.8297	FALSE
YHR018C	ARG4	chrVIII_139344_T_A_30025	-0.250034	58.6419	0	FALSE
YHR023W	MYO1	chrVIII_160450_T_C_30153	0.0391817	0.922548	0.688634	FALSE
YHR024C	MAS2	chrVIII_160450_T_C_30153	-0.109388	3.06661	0.0552489	FALSE
YHR025W	THR1	chrVIII_160450_T_C_30153	0.226309	18.7509	0	FALSE
YHR026W	VMA16	chrVIII_160450_T_C_30153	0.0268218	2.39841	0.149448	FALSE
YHR027C	RPN1	chrVIII_164927_T_A_30176	-0.00370851	1.2248	0.553622	FALSE
YHR028C	DAP2	chrVIII_164927_T_A_30176	-0.0330415	0.937911	0.681314	FALSE
YHR029C	YHI9	chrVIII_167475_G_A_30204	0.0431667	3.65545	0.0243329	FALSE
YHR030C	SLT2	chrVIII_167475_G_A_30204	0.00187805	0.406299	0.917166	FALSE
YHR031C	RRM3	chrVIII_175480_C_T_30259	0.293358	6.80734	0.000821355	FALSE
YHR032W	ERC1	chrVIII_175480_C_T_30259	0.376136	2.43854	0.14165	FALSE
YHR032W-A	YHR032W-A	chrVIII_175480_C_T_30259	-0.578147	21.4174	0	FALSE
YHR033W	YHR033W	chrVIII_175480_C_T_30259	-1.08703	66.0376	0	FALSE
YHR034C	PIH1	chrVIII_175480_C_T_30259	-0.0382844	0.88861	0.703167	FALSE
YHR035W	NEL1	chrVIII_175480_C_T_30259	0.435418	6.63753	0.000821355	FALSE
YHR036W	BRL1	chrVIII_183744_C_T_30310	-0.159528	4.15265	0.0127081	FALSE
YHR037W	PUT2	chrVIII_183744_C_T_30310	-0.219089	8.57789	0.000609756	FALSE
YHR045W	YHR045W	chrVIII_197407_T_C_30392	-0.0680399	0.927438	0.6857	FALSE
YHR046C	INM1	chrVIII_197407_T_C_30392	-0.0792318	1.10033	0.605974	FALSE
YHR047C	AAP1	chrVIII_197407_T_C_30392	0.104497	2.49033	0.132342	FALSE
YHR050W	SMF2	chrVIII_209243_C_T_30482	0.124783	6.2928	0.000821355	FALSE
YHR050W-A	YHR050W-A	chrVIII_209243_C_T_30482	-0.150492	1.75616	0.318076	FALSE
YHR051W	COX6	chrVIII_210500_A_G_30484	-0.0208219	2.40166	0.148945	FALSE
YHR052W	CIC1	chrVIII_210500_A_G_30484	-0.0265527	1.35057	0.491665	FALSE
YHR056C	RSC30	chrVIII_218120_C_T_30511	-0.171081	0.868689	0.710989	FALSE
YHR057C	CPR2	chrVIII_218120_C_T_30511	0.0276063	0.681156	0.794944	FALSE
YHR059W	FYV4	chrVIII_221114_C_T_30530	0.0103401	1.76652	0.31502	FALSE
YHR060W	VMA22	chrVIII_221114_C_T_30530	-0.0376691	2.4106	0.147368	FALSE
YHR061C	GIC1	chrVIII_221114_C_T_30530	0.0300358	1.56921	0.394488	FALSE
YHR062C	RPP1	chrVIII_221114_C_T_30530	0.0348556	0.264308	0.966684	FALSE
YHR063C	PAN5	chrVIII_227519_A_G_30565	-0.01418	1.19162	0.567107	FALSE
YHR064C	SSZ1	chrVIII_227519_A_G_30565	-0.00702166	0.760646	0.757925	FALSE
YHR065C	RRP3	chrVIII_227519_A_G_30565	0.286775	18.6693	0	FALSE
YHR066W	SSF1	chrVIII_231797_T_C_30606	0.0986609	2.73394	0.0913502	FALSE
YHR067W	HTD2	chrVIII_231797_T_C_30606	-0.157559	7.03061	0.000821355	FALSE
YHR068W	DYS1	chrVIII_233526_T_C_30620	-0.142848	21.4758	0	FALSE
YHR069C	RRP4	chrVIII_233526_T_C_30620	-0.0431018	2.69447	0.097644	FALSE
YHR074W	QNS1	chrVIII_250465_G_C_30709	0.0447597	1.63238	0.371092	FALSE
YHR075C	PPE1	chrVIII_250465_G_C_30709	-0.0502113	1.07675	0.616852	FALSE
YHR076W	PTC7	chrVIII_250465_G_C_30709	0.179041	6.27649	0.000821355	FALSE
YHR077C	NMD2	chrVIII_250465_G_C_30709	0.0146784	1.09383	0.609627	FALSE
YHR078W	YHR078W	chrVIII_257988_G_A_30737	-0.0268997	3.18581	0.0465735	FALSE
YHR079C	IRE1	chrVIII_257988_G_A_30737	-0.0295095	0.686733	0.793197	FALSE
YHR084W	STE12	chrVIII_276173_G_A_30830	-0.0194698	0.898035	0.698768	FALSE
YHR085W	IPI1	chrVIII_276173_G_A_30830	0.0204493	0.444089	0.902262	FALSE
YHR086W	NAM8	chrVIII_276173_G_A_30830	-0.122309	1.84699	0.291084	FALSE
YHR087W	RTC3	chrVIII_282930_T_C_30864	0.0078597	1.87666	0.283118	FALSE
YHR088W	RPF1	chrVIII_282930_T_C_30864	0.0232579	0.687193	0.793053	FALSE
YHR089C	GAR1	chrVIII_282930_T_C_30864	-0.123607	18.6156	0	FALSE
YHR096C	HXT5	chrVIII_297421_C_T_30994	-0.781932	50.3006	0	FALSE
YHR097C	YHR097C	chrVIII_297421_C_T_30994	0.0502833	2.84506	0.0782267	FALSE
YHR099W	TRA1	chrVIII_314176_T_G_31062	-0.0379507	0.787567	0.746375	FALSE
YHR100C	GEP4	chrVIII_314176_T_G_31062	0.0398258	1.88545	0.279532	FALSE
YHR101C	BIG1	chrVIII_314465_C_T_31064	0.0713822	1.15562	0.581479	FALSE
YHR102W	KIC1	chrVIII_314465_C_T_31064	-0.0389871	0.718558	0.779056	FALSE
YHR103W	SBE22	chrVIII_324254_G_A_31126	-0.120472	3.54313	0.0283606	FALSE
YHR104W	GRE3	chrVIII_324254_G_A_31126	0.00675516	1.58534	0.388213	FALSE
YHR110W	ERP5	chrVIII_332482_A_G_31170	0.0224127	1.27046	0.532085	FALSE
YHR111W	UBA4	chrVIII_332482_A_G_31170	0.0875327	2.53475	0.12389	FALSE
YHR112C	YHR112C	chrVIII_332482_A_G_31170	0.0275756	1.34246	0.496382	FALSE
YHR113W	APE4	chrVIII_337824_A_G_31203	-0.223678	14.6957	0	FALSE
YHR114W	BZZ1	chrVIII_337824_A_G_31203	0.255986	7.78511	0.000609756	FALSE
YHR115C	DMA1	chrVIII_337824_A_G_31203	0.758216	67.5655	0	FALSE
YHR116W	COX23	chrVIII_337824_A_G_31203	0.142975	3.16046	0.0473277	FALSE
YHR117W	TOM71	chrVIII_337824_A_G_31203	0.0854726	1.84558	0.291464	FALSE
YHR118C	ORC6	chrVIII_349406_A_G_31250	-0.0268586	0.564544	0.847678	FALSE
YHR119W	SET1	chrVIII_349406_A_G_31250	-0.0873899	1.67094	0.354007	FALSE
YHR120W	MSH1	chrVIII_349406_A_G_31250	0.0946739	1.67777	0.352397	FALSE
YHR127W	YHR127W	chrVIII_362222_T_C_31317	-0.253528	8.7803	0.000609756	FALSE
YHR128W	FUR1	chrVIII_362222_T_C_31317	-0.188992	21.1051	0	FALSE
YHR130C	YHR130C	chrVIII_365173_G_A_31339	0.0238277	0.943632	0.679411	FALSE
YHR131C	YHR131C	chrVIII_365173_G_A_31339	-0.0722249	1.1915	0.567159	FALSE
YHR134W	WSS1	chrVIII_373432_C_T_31388	0.0569442	0.323298	0.948249	FALSE
YHR135C	YCK1	chrVIII_373432_C_T_31388	-0.0627531	1.95479	0.257998	FALSE
YHR138C	YHR138C	chrVIII_377322_A_G_31402	0.37007	32.0814	0	FALSE
YHR139C	SPS100	chrVIII_377322_A_G_31402	-0.553379	4.57914	0.00645995	FALSE
YHR143W	DSE2	chrVIII_387439_T_C_31451	-0.0572741	0.633321	0.816676	FALSE
YHR143W-A	RPC10	chrVIII_387439_T_C_31451	0.0263923	1.1187	0.599167	FALSE
YHR144C	DCD1	chrVIII_387439_T_C_31451	-0.0191854	1.21924	0.555584	FALSE
YHR147C	MRPL6	chrVIII_392524_C_T_31493	0.0238584	0.691157	0.791652	FALSE
YHR148W	IMP3	chrVIII_392524_C_T_31493	-0.0436962	1.18256	0.570568	FALSE
YHR149C	SKG6	chrVIII_392524_C_T_31493	0.0172602	1.02067	0.643006	FALSE
YHR150W	PEX28	chrVIII_399023_C_T_31527	0.0668082	2.20241	0.190602	FALSE
YHR151C	MTC6	chrVIII_399023_C_T_31527	-0.231678	7.08249	0.000821355	FALSE
YHR152W	SPO12	chrVIII_401893_G_A_31548	0.0398238	1.17496	0.573755	FALSE
YHR153C	SPO16	chrVIII_401893_G_A_31548	0.11505	0.742063	0.766699	FALSE
YHR154W	RTT107	chrVIII_401893_G_A_31548	-0.01892	0.520155	0.868533	FALSE
YHR155W	LAM1	chrVIII_401893_G_A_31548	-0.0567446	1.15045	0.582795	FALSE
YHR156C	LIN1	chrVIII_420359_G_A_31622	0.0771972	2.06823	0.222778	FALSE
YHR158C	KEL1	chrVIII_420359_G_A_31622	0.0362038	0.818557	0.733485	FALSE
YHR159W	TDA11	chrVIII_420359_G_A_31622	-0.125318	2.07556	0.221367	FALSE
YHR161C	YAP1801	chrVIII_420359_G_A_31622	0.0087302	1.05736	0.62677	FALSE
YHR163W	SOL3	chrVIII_424278_T_C_31637	0.00309552	1.67201	0.353756	FALSE
YHR164C	DNA2	chrVIII_424278_T_C_31637	-0.0622269	0.626397	0.81916	FALSE
YHR165C	PRP8	chrVIII_424278_T_C_31637	-0.0411328	1.94641	0.260271	FALSE
YHR166C	CDC23	chrVIII_443428_A_G_31731	-0.0433348	0.85087	0.719934	FALSE
YHR167W	THP2	chrVIII_443428_A_G_31731	0.0163952	0.987386	0.661252	FALSE
YHR168W	MTG2	chrVIII_443428_A_G_31731	-0.139254	1.47905	0.429761	FALSE
YHR169W	DBP8	chrVIII_443428_A_G_31731	-0.125268	4.99103	0.00335664	FALSE
YHR170W	NMD3	chrVIII_443428_A_G_31731	-0.0285441	2.12047	0.210942	FALSE
YHR171W	ATG7	chrVIII_448829_G_A_31750	0.0913244	2.4313	0.142972	FALSE
YHR172W	SPC97	chrVIII_448829_G_A_31750	0.121625	1.11246	0.60198	FALSE
YHR175W	CTR2	chrVIII_453724_A_G_31765	-0.0277452	0.974105	0.667532	FALSE
YHR175W-A	YHR175W-A	chrVIII_453724_A_G_31765	0.511521	25.0062	0	FALSE
YHR179W	OYE2	chrVIII_462717_A_G_31833	0.0187145	0.943014	0.679607	FALSE
YHR180W	YHR180W	chrVIII_462717_A_G_31833	0.041059	0.788227	0.74615	FALSE
YHR181W	SVP26	chrVIII_462717_A_G_31833	-0.0183684	1.4312	0.452399	FALSE
YHR182W	YHR182W	chrVIII_462717_A_G_31833	0.119375	0.915473	0.692126	FALSE
YHR183W	GND1	chrVIII_462717_A_G_31833	-0.0311095	4.57231	0.00645995	FALSE
YHR186C	KOG1	chrVIII_481994_A_G_31950	-0.148574	2.2568	0.17696	FALSE
YHR187W	IKI1	chrVIII_481994_A_G_31950	0.16058	5.12796	0.00301205	FALSE
YHR188C	GPI16	chrVIII_481994_A_G_31950	0.000845141	1.73643	0.324893	FALSE
YHR190W	ERG9	chrVIII_486077_T_C_31977	-0.035044	1.08162	0.614429	FALSE
YHR191C	CTF8	chrVIII_486077_T_C_31977	-0.00295275	0.486795	0.883169	FALSE
YHR192W	LNP1	chrVIII_486077_T_C_31977	-0.033979	1.10631	0.604191	FALSE
YHR194W	MDM31	chrVIII_490193_G_A_32002	-0.118941	1.83413	0.293834	FALSE
YHR195W	NVJ1	chrVIII_490193_G_A_32002	0.031836	3.42003	0.0340167	FALSE
YHR196W	UTP9	chrVIII_490193_G_A_32002	0.0343834	1.18881	0.568249	FALSE
YHR197W	RIX1	chrVIII_490193_G_A_32002	-0.149759	3.94701	0.0181136	FALSE
YHR198C	AIM18	chrVIII_490193_G_A_32002	0.0617341	0.993355	0.657938	FALSE
YHR199C	AIM46	chrVIII_490193_G_A_32002	-0.0172486	0.553628	0.852424	FALSE
YHR200W	RPN10	chrVIII_490193_G_A_32002	-0.00185756	0.76101	0.757783	FALSE
YHR201C	PPX1	chrVIII_490193_G_A_32002	-0.0767657	1.83773	0.2933	FALSE
YHR202W	YHR202W	chrVIII_490193_G_A_32002	-0.0659797	1.02685	0.640614	FALSE
YHR203C	RPS4B	chrVIII_490193_G_A_32002	-0.0126952	2.0804	0.220315	FALSE
YHR204W	MNL1	chrVIII_490193_G_A_32002	0.079396	1.37787	0.478946	FALSE
YHR205W	SCH9	chrVIII_490193_G_A_32002	0.0617874	0.7498	0.763266	FALSE
YHR206W	SKN7	chrVIII_490193_G_A_32002	0.0587801	1.98838	0.246715	FALSE
YHR207C	SET5	chrVIII_490193_G_A_32002	0.103134	1.64819	0.364486	FALSE
YHR208W	BAT1	chrVIII_490193_G_A_32002	0.0514874	3.58568	0.0267429	FALSE
YHR209W	CRG1	chrVIII_490193_G_A_32002	0.139899	0.919074	0.690564	FALSE
YHR210C	YHR210C	chrVIII_490193_G_A_32002	-0.0358157	0.880855	0.706773	FALSE
YHR215W	PHO12	chrVIII_560738_A_G_32375	-0.353278	5.91608	0.00141343	FALSE
YHR216W	IMD2	chrVIII_560738_A_G_32375	0.567705	11.0632	0	FALSE
YIL001W	YIL001W	chrIX_358189_A_G_34223	-0.00380959	0.883812	0.705398	FALSE
YIL002C	INP51	chrIX_350005_A_G_34188	-0.0455071	0.458866	0.896121	FALSE
YIL002W-A	YIL002W-A	chrIX_350005_A_G_34188	-0.160105	12.9926	0	FALSE
YIL004C	BET1	chrIX_347916_A_G_34173	0.0482549	1.23943	0.547733	FALSE
YIL005W	EPS1	chrIX_347916_A_G_34173	0.00556658	0.336969	0.943853	FALSE
YIL006W	YIA6	chrIX_342976_T_C_34142	-0.0429349	0.877757	0.707863	FALSE
YIL007C	NAS2	chrIX_342976_T_C_34142	-0.0612549	0.793298	0.743447	FALSE
YIL008W	URM1	chrIX_342976_T_C_34142	0.0312568	1.5932	0.385646	FALSE
YIL010W	DOT5	chrIX_335555_T_A_34084	0.234567	24.7737	0	FALSE
YIL011W	TIR3	chrIX_335555_T_A_34084	-0.849118	124.606	0	TRUE
YIL014C-A	YIL014C-A	chrIX_324029_C_T_34039	0.851203	83.0254	0	FALSE
YIL014W	MNT3	chrIX_324029_C_T_34039	-0.058193	0.63665	0.815585	FALSE
YIL015W	BAR1	chrIX_324029_C_T_34039	-0.0870516	4.49668	0.00681818	FALSE
YIL017C	VID28	chrIX_318187_G_A_34019	0.0650381	2.07951	0.220526	FALSE
YIL018W	RPL2B	chrIX_318187_G_A_34019	0.00238416	0.92991	0.684217	FALSE
YIL020C	HIS6	chrIX_312859_G_A_33990	-0.0769046	2.53425	0.123942	FALSE
YIL021W	RPB3	chrIX_312859_G_A_33990	-0.024002	1.17139	0.575339	FALSE
YIL022W	TIM44	chrIX_312859_G_A_33990	0.0678299	2.48654	0.133105	FALSE
YIL023C	YKE4	chrIX_312859_G_A_33990	-0.0151041	1.76363	0.315956	FALSE
YIL024C	YIL024C	chrIX_312859_G_A_33990	0.180766	2.33964	0.158656	FALSE
YIL026C	IRR1	chrIX_300544_T_C_33894	-0.0440803	0.550434	0.853863	FALSE
YIL027C	EMC5	chrIX_300544_T_C_33894	0.0374858	1.69939	0.342946	FALSE
YIL030C	SSM4	chrIX_300544_T_C_33894	-0.0476698	0.56198	0.848738	FALSE
YIL031W	ULP2	chrIX_290108_G_C_33814	-0.19034	2.74079	0.0902854	FALSE
YIL033C	BCY1	chrIX_290108_G_C_33814	-0.0653275	2.77663	0.0854956	FALSE
YIL034C	CAP2	chrIX_289162_T_A_33812	0.0548304	2.00101	0.242466	FALSE
YIL035C	CKA1	chrIX_289162_T_A_33812	-0.0306089	1.01026	0.64829	FALSE
YIL037C	PRM2	chrIX_282578_A_G_33754	0.360609	5.78462	0.00141343	FALSE
YIL038C	NOT3	chrIX_282578_A_G_33754	0.0163961	0.499004	0.877636	FALSE
YIL043C	CBR1	chrIX_274263_T_C_33713	0.262624	49.2452	0	FALSE
YIL044C	AGE2	chrIX_274263_T_C_33713	-0.115792	4.23986	0.0114695	FALSE
YIL047C	SYG1	chrIX_267785_C_T_33673	0.0765726	1.91307	0.269386	FALSE
YIL047C-A	YIL047C-A	chrIX_267785_C_T_33673	0.024725	1.58036	0.389567	FALSE
YIL048W	NEO1	chrIX_259778_T_C_33643	0.0162753	0.809025	0.736484	FALSE
YIL049W	DFG10	chrIX_259778_T_C_33643	0.117815	2.33499	0.159327	FALSE
YIL050W	PCL7	chrIX_259778_T_C_33643	0.030602	1.64441	0.366215	FALSE
YIL052C	RPL34B	chrIX_256114_A_G_33628	0.00359551	1.08735	0.612654	FALSE
YIL053W	GPP1	chrIX_256114_A_G_33628	0.0318506	2.65966	0.10382	FALSE
YIL055C	YIL055C	chrIX_251559_T_C_33613	-0.0191418	0.509242	0.872855	FALSE
YIL056W	VHR1	chrIX_251559_T_C_33613	0.00468957	2.02314	0.236661	FALSE
YIL059C	YIL059C	chrIX_242863_T_C_33562	0.0923398	0.778006	0.750015	FALSE
YIL061C	SNP1	chrIX_242863_T_C_33562	0.00334735	0.771163	0.753659	FALSE
YIL062C	ARC15	chrIX_242863_T_C_33562	-0.0180887	0.597628	0.834563	FALSE
YIL063C	YRB2	chrIX_242713_C_T_33561	-0.0652752	2.08681	0.218586	FALSE
YIL064W	EFM4	chrIX_242713_C_T_33561	-0.0139185	1.08066	0.614728	FALSE
YIL065C	FIS1	chrIX_241314_T_C_33558	-0.0477938	1.65266	0.362552	FALSE
YIL066C	RNR3	chrIX_241314_T_C_33558	-0.152352	1.20405	0.561694	FALSE
YIL067C	YIL067C	chrIX_241314_T_C_33558	0.0233048	0.763746	0.756716	FALSE
YIL068C	SEC6	chrIX_241314_T_C_33558	-0.0867995	1.9512	0.258865	FALSE
YIL069C	RPS24B	chrIX_226523_C_T_33490	-0.0165125	1.56779	0.395063	FALSE
YIL070C	MAM33	chrIX_226523_C_T_33490	0.0692761	1.67737	0.352493	FALSE
YIL071C	PCI8	chrIX_226523_C_T_33490	0.383013	9.90114	0.000609756	FALSE
YIL072W	HOP1	chrIX_226523_C_T_33490	-0.347622	3.42575	0.0336427	FALSE
YIL076W	SEC28	chrIX_217389_A_G_33468	0.113068	9.11553	0.000609756	FALSE
YIL077C	YIL077C	chrIX_217389_A_G_33468	0.0445898	0.78912	0.745846	FALSE
YIL078W	THS1	chrIX_211150_T_C_33444	-0.0457322	3.62889	0.0252815	FALSE
YIL079C	AIR1	chrIX_211150_T_C_33444	0.0379387	0.325368	0.947424	FALSE
YIL082W	YIL082W	chrIX_202271_A_G_33416	0.185756	3.30714	0.040107	FALSE
YIL083C	CAB2	chrIX_202271_A_G_33416	0.0467144	2.84836	0.0781828	FALSE
YIL084C	SDS3	chrIX_202271_A_G_33416	-0.0619654	0.819287	0.733254	FALSE
YIL085C	KTR7	chrIX_200346_A_G_33396	0.0385662	0.817325	0.733875	FALSE
YIL087C	AIM19	chrIX_200346_A_G_33396	-0.475737	52.7727	0	FALSE
YIL088C	AVT7	chrIX_197094_A_G_33378	0.426879	26.3324	0	FALSE
YIL090W	ICE2	chrIX_197094_A_G_33378	0.0513905	0.815086	0.734584	FALSE
YIL091C	UTP25	chrIX_187360_A_G_33310	0.0381004	1.80769	0.302107	FALSE
YIL092W	YIL092W	chrIX_187360_A_G_33310	0.368319	6.33261	0.000821355	FALSE
YIL093C	RSM25	chrIX_187360_A_G_33310	0.0178903	0.408245	0.916532	FALSE
YIL094C	LYS12	chrIX_187360_A_G_33310	-0.122184	37.1219	0	FALSE
YIL095W	PRK1	chrIX_187360_A_G_33310	0.0162675	1.29093	0.52224	FALSE
YIL096C	BMT5	chrIX_187360_A_G_33310	0.261533	8.66262	0.000609756	FALSE
YIL097W	FYV10	chrIX_187360_A_G_33310	-0.173472	2.48004	0.13443	FALSE
YIL098C	FMC1	chrIX_173181_C_T_33216	-0.02793	0.47581	0.887813	FALSE
YIL099W	SGA1	chrIX_173181_C_T_33216	-0.406255	1.67805	0.352333	FALSE
YIL100C-A	YIL100C-A	chrIX_173181_C_T_33216	-0.200617	0.635708	0.815894	FALSE
YIL101C	XBP1	chrIX_173181_C_T_33216	-0.386081	3.99437	0.0162888	FALSE
YIL102C-A	YIL102C-A	chrIX_173181_C_T_33216	0.182874	4.96419	0.00335664	FALSE
YIL103W	DPH1	chrIX_173181_C_T_33216	-0.0487556	0.6613	0.804778	FALSE
YIL104C	SHQ1	chrIX_173181_C_T_33216	-0.00991805	0.856959	0.717201	FALSE
YIL105C	SLM1	chrIX_167971_G_A_33196	-0.0277374	1.60023	0.38279	FALSE
YIL106W	MOB1	chrIX_167971_G_A_33196	-0.0851576	2.43325	0.142617	FALSE
YIL108W	YIL108W	chrIX_159685_A_G_33179	0.0577816	0.818092	0.733632	FALSE
YIL109C	SEC24	chrIX_159685_A_G_33179	0.0164372	1.27103	0.531898	FALSE
YIL110W	HPM1	chrIX_159685_A_G_33179	-0.120327	2.98592	0.0619635	FALSE
YIL111W	COX5B	chrIX_159685_A_G_33179	-0.165361	6.20822	0.000821355	FALSE
YIL112W	HOS4	chrIX_159685_A_G_33179	0.0179486	2.73012	0.0919835	FALSE
YIL113W	SDP1	chrIX_144516_T_C_33111	-0.228117	4.51134	0.00681818	FALSE
YIL114C	POR2	chrIX_144516_T_C_33111	0.0575241	0.832324	0.727363	FALSE
YIL115C	NUP159	chrIX_144516_T_C_33111	0.0633095	3.36729	0.0367758	FALSE
YIL116W	HIS5	chrIX_144516_T_C_33111	0.155864	10.3985	0.000609756	FALSE
YIL117C	PRM5	chrIX_144516_T_C_33111	-0.0625959	2.50389	0.129752	FALSE
YIL118W	RHO3	chrIX_144516_T_C_33111	0.0672403	2.11677	0.211757	FALSE
YIL119C	RPI1	chrIX_144516_T_C_33111	0.0834292	1.00617	0.650509	FALSE
YIL120W	QDR1	chrIX_129784_A_G_33028	0.0535665	1.09983	0.606166	FALSE
YIL121W	QDR2	chrIX_129784_A_G_33028	-0.561142	4.39536	0.0081381	FALSE
YIL122W	POG1	chrIX_129784_A_G_33028	0.193547	3.38431	0.0358221	FALSE
YIL123W	SIM1	chrIX_129784_A_G_33028	-0.0161181	0.601601	0.832798	FALSE
YIL124W	AYR1	chrIX_125940_C_A_33017	-0.0281147	1.80191	0.30336	FALSE
YIL125W	KGD1	chrIX_125940_C_A_33017	0.0113062	0.582805	0.839514	FALSE
YIL126W	STH1	chrIX_118256_G_C_33002	-0.0214477	0.869872	0.710329	FALSE
YIL127C	RRT14	chrIX_118256_G_C_33002	-0.00440252	0.0930165	0.997054	FALSE
[truncated: 2,384 more rows]

## Sheet: S3 (Cross C)
transcript	gene name	closest marker	estimate (one-pot)	LOD (one-pot)	FDR (one-pot)	has cell-cycle interaction
YAL001C	TFC3	chrI_147759_T_A_1306	-0.324937	2.65863	0.154865	FALSE
YAL002W	VPS8	chrI_147759_T_A_1306	0.065611	0.916466	0.73081	FALSE
YAL003W	EFB1	chrI_139034_G_T_1261	-0.0150573	1.25482	0.589385	FALSE
YAL005C	SSA1	chrI_139034_G_T_1261	-0.238828	6.28951	0.00120482	FALSE
YAL007C	ERP2	chrI_137794_T_C_1248	0.0460876	1.23638	0.596901	FALSE
YAL008W	FUN14	chrI_137794_T_C_1248	0.320033	2.95286	0.107038	FALSE
YAL009W	SPO7	chrI_137794_T_C_1248	0.0431045	2.37313	0.221378	FALSE
YAL013W	DEP1	chrI_128423_G_A_1172	0.0449951	1.1434	0.636705	FALSE
YAL014C	SYN8	chrI_128423_G_A_1172	0.21193	1.90344	0.345712	FALSE
YAL016W	TPD3	chrI_126600_G_A_1160	-0.0301072	1.34676	0.549731	FALSE
YAL017W	PSK1	chrI_126600_G_A_1160	0.314363	4.10346	0.0193282	FALSE
YAL019W	FUN30	chrI_113713_G_A_1058	-0.0754464	1.00957	0.69056	FALSE
YAL020C	ATS1	chrI_113713_G_A_1058	0.599805	6.01033	0.00120482	FALSE
YAL021C	CCR4	chrI_113713_G_A_1058	0.0562763	2.81213	0.127002	FALSE
YAL022C	FUN26	chrI_113713_G_A_1058	-0.0957096	0.792758	0.779648	FALSE
YAL023C	PMT2	chrI_113713_G_A_1058	-0.00551199	0.56901	0.872551	FALSE
YAL025C	MAK16	chrI_87859_T_G_863	-0.0351275	0.72199	0.812455	FALSE
YAL026C-A	YAL026C-A	chrI_87859_T_G_863	-0.130058	0.214562	0.980116	FALSE
YAL027W	SAW1	chrI_87859_T_G_863	-0.0986827	1.62765	0.442117	FALSE
YAL028W	FRT2	chrI_87859_T_G_863	-0.460171	3.80815	0.0288678	FALSE
YAL029C	MYO4	chrI_87859_T_G_863	0.0904207	2.72658	0.143396	FALSE
YAL030W	SNC1	chrI_87548_A_G_860	-0.123407	2.2937	0.240092	FALSE
YAL031C	GIP4	chrI_87548_A_G_860	0.399279	1.83111	0.372379	FALSE
YAL034C	FUN19	chrI_80579_G_A_818	-0.167822	3.463	0.0492675	FALSE
YAL034W-A	MTW1	chrI_80579_G_A_818	0.119745	4.88473	0.00379147	FALSE
YAL046C	BOL3	chrI_57038_T_G_657	0.217119	5.35781	0.00155039	FALSE
YAL047C	SPC72	chrI_57038_T_G_657	0.226311	0.525946	0.88692	FALSE
YAL049C	AIM2	chrI_57038_T_G_657	0.681344	33.7527	0	FALSE
YAL051W	OAF1	chrI_57038_T_G_657	0.0640589	0.414273	0.933123	FALSE
YAL053W	FLC2	chrI_42905_A_G_497	-0.272443	1.68383	0.421579	FALSE
YAL054C	ACS1	chrI_42905_A_G_497	0.908917	39.4703	0	FALSE
YAL055W	PEX22	chrI_42635_C_T_494	0.123578	0.91037	0.732052	FALSE
YAL056W	GPB2	chrI_42635_C_T_494	0.206719	1.45782	0.512675	FALSE
YAL058W	CNE1	chrI_36940_C_T_410	0.0511385	1.72415	0.408638	FALSE
YAL059W	ECM1	chrI_36940_C_T_410	0.131898	1.31089	0.565781	FALSE
YAL060W	BDH1	chrI_36313_A_G_408	0.497562	24.5702	0	FALSE
YAL061W	BDH2	chrI_36313_A_G_408	0.125492	0.550495	0.877554	FALSE
YAL062W	GDH3	chrI_36313_A_G_408	-1.25868	15.0781	0	FALSE
YAR002C-A	ERP1	chrI_147759_T_A_1306	0.291866	4.0829	0.0201521	FALSE
YAR002W	NUP60	chrI_147759_T_A_1306	-0.243367	1.53924	0.47848	FALSE
YAR003W	SWD1	chrI_147759_T_A_1306	-0.25703	2.71389	0.14537	FALSE
YAR007C	RFA1	chrI_166820_C_T_1414	0.262149	1.66671	0.426366	FALSE
YAR008W	SEN34	chrI_166820_C_T_1414	0.228687	0.632562	0.847786	FALSE
YAR014C	BUD14	chrI_166820_C_T_1414	0.381346	4.49443	0.00819672	FALSE
YAR018C	KIN3	chrI_171927_C_T_1437	-0.0178777	0.787766	0.782208	FALSE
YAR019C	CDC15	chrI_171927_C_T_1437	0.20863	1.41473	0.527029	FALSE
YBL001C	ECM15	chrII_236626_T_C_3396	0.128109	4.90149	0.00379147	FALSE
YBL002W	HTB2	chrII_236626_T_C_3396	0.169609	3.65912	0.036284	FALSE
YBL007C	SLA1	chrII_212904_T_C_3257	0.184833	3.1965	0.0736174	FALSE
YBL008W	HIR1	chrII_212904_T_C_3257	0.0406685	1.42713	0.523281	FALSE
YBL009W	ALK2	chrII_212904_T_C_3257	0.0570888	0.592367	0.863691	FALSE
YBL011W	SCT1	chrII_212904_T_C_3257	-0.277388	4.2575	0.0157046	FALSE
YBL014C	RRN6	chrII_195859_G_A_3133	0.60493	4.75735	0.00409091	FALSE
YBL015W	ACH1	chrII_195859_G_A_3133	-0.98583	23.3267	0	FALSE
YBL016W	FUS3	chrII_195859_G_A_3133	-0.22259	2.11394	0.283841	FALSE
YBL017C	PEP1	chrII_185979_T_A_3030	0.119009	0.612082	0.855449	FALSE
YBL018C	POP8	chrII_185979_T_A_3030	0.141276	2.62626	0.160802	FALSE
YBL019W	APN2	chrII_184388_G_A_3018	-1.01591	11.9341	0	FALSE
YBL020W	RFT1	chrII_184388_G_A_3018	-0.154881	1.13743	0.63893	FALSE
YBL021C	HAP3	chrII_184388_G_A_3018	-0.201514	1.70991	0.411533	FALSE
YBL022C	PIM1	chrII_177341_A_G_2982	-0.0384428	0.564278	0.873877	FALSE
YBL023C	MCM2	chrII_177341_A_G_2982	0.146604	0.846648	0.757605	FALSE
YBL024W	NCL1	chrII_177341_A_G_2982	0.00707815	0.802752	0.775038	FALSE
YBL026W	LSM2	chrII_169551_A_G_2935	0.099043	2.55997	0.173755	FALSE
YBL027W	RPL19B	chrII_169551_A_G_2935	0.0204637	0.909404	0.732231	FALSE
YBL028C	YBL028C	chrII_169551_A_G_2935	0.107489	2.20477	0.262479	FALSE
YBL029C-A	YBL029C-A	chrII_163080_G_A_2885	0.267402	5.86338	0.00120482	FALSE
YBL029W	YBL029W	chrII_169551_A_G_2935	0.357071	1.83825	0.36985	FALSE
YBL030C	PET9	chrII_163080_G_A_2885	-0.00117342	0.252979	0.972377	FALSE
YBL031W	SHE1	chrII_163080_G_A_2885	-0.333749	2.96386	0.10622	FALSE
YBL033C	RIB1	chrII_157193_C_T_2861	-0.00453041	0.820243	0.76851	FALSE
YBL034C	STU1	chrII_157193_C_T_2861	-0.0939268	0.390452	0.939534	FALSE
YBL035C	POL12	chrII_157193_C_T_2861	-0.103427	0.884148	0.741724	FALSE
YBL036C	YBL036C	chrII_157193_C_T_2861	0.0308372	1.60923	0.449962	FALSE
YBL037W	APL3	chrII_142748_A_G_2774	0.0735245	0.308226	0.961002	FALSE
YBL038W	MRPL16	chrII_142748_A_G_2774	-0.0315698	0.967814	0.706888	FALSE
YBL039C	URA7	chrII_142748_A_G_2774	0.111893	2.23031	0.25474	FALSE
YBL039W-B	YBL039W-B	chrII_142748_A_G_2774	-0.120267	2.84029	0.12224	FALSE
YBL040C	ERD2	chrII_142748_A_G_2774	0.11891	4.15598	0.0184414	FALSE
YBL043W	ECM13	chrII_138095_C_T_2750	0.473711	1.39534	0.532211	FALSE
YBL045C	COR1	chrII_138095_C_T_2750	0.152217	3.74502	0.0328173	FALSE
YBL046W	PSY4	chrII_138095_C_T_2750	0.181448	1.18929	0.620587	FALSE
YBL047C	EDE1	chrII_138095_C_T_2750	-0.00454736	1.36525	0.542519	FALSE
YBL048W	RRT1	chrII_138095_C_T_2750	-0.339071	1.41815	0.525689	FALSE
YBL050W	SEC17	chrII_138095_C_T_2750	0.0125245	0.679813	0.830191	FALSE
YBL051C	PIN4	chrII_110028_C_G_2607	0.345823	1.72856	0.407636	FALSE
YBL054W	TOD6	chrII_110028_C_G_2607	0.325007	1.99739	0.31457	FALSE
YBL055C	YBL055C	chrII_110028_C_G_2607	0.261216	1.21456	0.605335	FALSE
YBL056W	PTC3	chrII_110028_C_G_2607	0.0329395	1.57977	0.463902	FALSE
YBL057C	PTH2	chrII_110028_C_G_2607	-0.190694	2.45959	0.199387	FALSE
YBL058W	SHP1	chrII_110028_C_G_2607	-0.147807	2.67209	0.15192	FALSE
YBL059C-A	CMC2	chrII_110028_C_G_2607	0.135555	2.61391	0.163649	FALSE
YBL059W	YBL059W	chrII_110028_C_G_2607	0.182292	1.78981	0.389328	FALSE
YBL060W	YEL1	chrII_110028_C_G_2607	-0.0180447	0.617205	0.853956	FALSE
YBL061C	SKT5	chrII_110028_C_G_2607	0.160153	2.20691	0.261895	FALSE
YBL063W	KIP1	chrII_110028_C_G_2607	-0.0839405	0.303427	0.961698	FALSE
YBL064C	PRX1	chrII_110028_C_G_2607	-0.0170081	2.2779	0.242967	FALSE
YBL067C	UBP13	chrII_90326_C_T_2507	0.0327636	0.918884	0.730317	FALSE
YBL068W	PRS4	chrII_90326_C_T_2507	-0.0424554	0.831124	0.763879	FALSE
YBL071W-A	KTI11	chrII_90326_C_T_2507	-0.0529722	1.96775	0.323891	FALSE
YBL072C	RPS8A	chrII_90326_C_T_2507	-0.00276569	1.06595	0.666604	FALSE
YBL076C	ILS1	chrII_90326_C_T_2507	-0.125781	1.98899	0.316861	FALSE
YBL078C	ATG8	chrII_90326_C_T_2507	-0.105883	1.57374	0.466022	FALSE
YBL079W	NUP170	chrII_90326_C_T_2507	-0.41328	3.63863	0.037408	FALSE
YBL080C	PET112	chrII_90326_C_T_2507	-0.261264	1.3051	0.568713	FALSE
YBL081W	YBL081W	chrII_90326_C_T_2507	0.160878	1.06199	0.667395	FALSE
YBL084C	CDC27	chrII_90326_C_T_2507	-0.0633805	1.46361	0.510993	FALSE
YBL085W	BOI1	chrII_90326_C_T_2507	-0.123073	1.28743	0.577187	FALSE
YBL087C	RPL23A	chrII_38779_C_A_2200	-0.0160393	1.40756	0.52934	FALSE
YBL088C	TEL1	chrII_38779_C_A_2200	0.18688	0.529997	0.885007	FALSE
YBL089W	AVT5	chrII_38779_C_A_2200	0.0936354	0.533395	0.883804	FALSE
YBL090W	MRP21	chrII_38779_C_A_2200	0.197224	4.41826	0.0106931	FALSE
YBL091C	MAP2	chrII_38779_C_A_2200	0.0796676	0.390331	0.939582	FALSE
YBL091C-A	SCS22	chrII_38779_C_A_2200	0.0483548	1.77969	0.392192	FALSE
YBL092W	RPL32	chrII_38779_C_A_2200	-0.00574334	1.61702	0.44662	FALSE
YBL093C	ROX3	chrII_38779_C_A_2200	0.207597	1.61099	0.449125	FALSE
YBL095W	MRX3	chrII_38779_C_A_2200	0.0445558	0.763359	0.793493	FALSE
YBL098W	BNA4	chrII_38779_C_A_2200	-0.046494	1.27785	0.579202	FALSE
YBL099W	ATP1	chrII_38779_C_A_2200	0.0533964	1.51092	0.490891	FALSE
YBL101C	ECM21	chrII_38779_C_A_2200	-0.218093	0.96438	0.707978	FALSE
YBL102W	SFT2	chrII_38779_C_A_2200	-0.0805481	1.03483	0.680283	FALSE
YBL104C	SEA4	chrII_9932_T_C_2064	0.218307	0.589572	0.864262	FALSE
YBL105C	PKC1	chrII_9932_T_C_2064	-0.211159	0.959128	0.709833	FALSE
YBL106C	SRO77	chrII_9932_T_C_2064	-0.491221	2.18067	0.26889	FALSE
YBL107C	MIX23	chrII_9932_T_C_2064	-0.508866	7.08363	0.000787402	FALSE
YBL113C	YBL113C	chrII_9932_T_C_2064	0.0382191	0.305049	0.961463	FALSE
YBR001C	NTH2	chrII_236626_T_C_3396	0.163605	0.869352	0.748044	FALSE
YBR002C	RER2	chrII_236626_T_C_3396	0.0836377	1.01082	0.690159	FALSE
YBR003W	COQ1	chrII_236626_T_C_3396	0.080844	0.331002	0.955062	FALSE
YBR004C	GPI18	chrII_236626_T_C_3396	-0.0264944	0.47936	0.907215	FALSE
YBR005W	RCR1	chrII_254742_C_T_3543	-0.20812	2.41969	0.208977	FALSE
YBR006W	UGA2	chrII_254742_C_T_3543	-0.968151	31.7869	0	FALSE
YBR007C	DSF2	chrII_254742_C_T_3543	-0.19589	2.33387	0.22844	FALSE
YBR008C	FLR1	chrII_254742_C_T_3543	-0.370878	3.36096	0.0595261	FALSE
YBR014C	GRX7	chrII_265673_T_C_3592	-0.28875	4.42897	0.0103562	FALSE
YBR015C	MNN2	chrII_265673_T_C_3592	-0.0611821	0.171461	0.989415	FALSE
YBR016W	YBR016W	chrII_265673_T_C_3592	0.293202	5.08067	0.00296296	FALSE
YBR017C	KAP104	chrII_265673_T_C_3592	-0.414304	6.56381	0.000787402	FALSE
YBR019C	GAL10	chrII_284108_C_T_3886	3.12489	45.5677	0	FALSE
YBR021W	FUR4	chrII_284108_C_T_3886	0.606508	5.34885	0.00155039	FALSE
YBR022W	POA1	chrII_284108_C_T_3886	-0.361529	7.50214	0.000787402	FALSE
YBR023C	CHS3	chrII_284108_C_T_3886	-0.292265	4.08196	0.0202052	FALSE
YBR024W	SCO2	chrII_284108_C_T_3886	-0.150467	0.810905	0.772537	FALSE
YBR025C	OLA1	chrII_296491_T_C_4010	-0.016944	1.95358	0.32814	FALSE
YBR026C	ETR1	chrII_296491_T_C_4010	0.357913	2.03268	0.306204	FALSE
YBR028C	YPK3	chrII_296491_T_C_4010	0.30045	3.23338	0.0712609	FALSE
YBR029C	CDS1	chrII_296491_T_C_4010	-0.0985637	1.68634	0.420977	FALSE
YBR030W	RKM3	chrII_301324_C_T_4036	0.0268595	0.131985	0.993628	FALSE
YBR031W	RPL4A	chrII_301324_C_T_4036	-0.0541797	3.64115	0.0373122	FALSE
YBR035C	PDX3	chrII_306456_G_T_4106	0.292278	11.5509	0	FALSE
YBR036C	CSG2	chrII_306456_G_T_4106	-0.0539287	0.355285	0.948374	FALSE
YBR037C	SCO1	chrII_306456_G_T_4106	0.143877	0.606765	0.858125	FALSE
YBR038W	CHS2	chrII_316657_T_G_4194	0.134234	1.20498	0.610914	FALSE
YBR039W	ATP3	chrII_316657_T_G_4194	0.326897	13.6592	0	FALSE
YBR041W	FAT1	chrII_316657_T_G_4194	-6.32543e-05	1.11058	0.648672	FALSE
YBR042C	CST26	chrII_324024_G_T_4230	0.0374928	1.24561	0.593433	FALSE
YBR043C	QDR3	chrII_324024_G_T_4230	-0.232351	1.81104	0.381958	FALSE
YBR044C	TCM62	chrII_324024_G_T_4230	0.303398	2.97642	0.105337	FALSE
YBR045C	GIP1	chrII_324024_G_T_4230	-0.0807272	0.38072	0.940471	FALSE
YBR046C	ZTA1	chrII_324024_G_T_4230	0.436032	3.14306	0.0822584	FALSE
YBR047W	FMP23	chrII_338664_A_T_4329	-0.00863014	0.331114	0.955043	FALSE
YBR048W	RPS11B	chrII_338664_A_T_4329	0.0352225	2.02977	0.306707	FALSE
YBR049C	REB1	chrII_338664_A_T_4329	0.0680244	0.701994	0.82121	FALSE
YBR052C	RFS1	chrII_338664_A_T_4329	-0.14082	2.08251	0.292692	FALSE
YBR054W	YRO2	chrII_344290_A_G_4373	0.0344037	0.412465	0.933323	FALSE
YBR055C	PRP6	chrII_344290_A_G_4373	0.3605	1.66487	0.427251	FALSE
YBR056W-A	YBR056W-A	chrII_351793_C_T_4452	-0.0106633	1.41855	0.525535	FALSE
YBR057C	MUM2	chrII_351793_C_T_4452	0.172152	2.04001	0.304987	FALSE
YBR058C	UBP14	chrII_356462_C_G_4474	0.294828	2.64276	0.157952	FALSE
YBR058C-A	TSC3	chrII_356462_C_G_4474	0.088545	2.64579	0.157011	FALSE
YBR059C	AKL1	chrII_356462_C_G_4474	0.507043	7.23559	0.000787402	FALSE
YBR060C	ORC2	chrII_356462_C_G_4474	0.459549	2.86633	0.117121	FALSE
YBR061C	TRM7	chrII_372020_A_G_4555	-0.121554	0.38227	0.940344	FALSE
YBR062C	YBR062C	chrII_372020_A_G_4555	-0.183766	1.50195	0.492412	FALSE
YBR063C	YBR063C	chrII_372020_A_G_4555	-0.030716	1.21329	0.605968	FALSE
YBR066C	NRG2	chrII_372020_A_G_4555	-0.985324	11.8367	0	FALSE
YBR067C	TIP1	chrII_372020_A_G_4555	-0.474938	2.02031	0.309087	FALSE
YBR070C	ALG14	chrII_374149_G_C_4576	0.260248	1.30389	0.569306	FALSE
YBR071W	YBR071W	chrII_374149_G_C_4576	0.129564	1.07278	0.66492	FALSE
YBR072W	HSP26	chrII_374149_G_C_4576	-0.478395	1.41917	0.525292	FALSE
YBR073W	RDH54	chrII_392182_T_A_4689	0.159739	0.647301	0.843777	FALSE
YBR074W	PFF1	chrII_392182_T_A_4689	0.378216	5.77437	0.00120482	FALSE
YBR076C-A	YBR076C-A	chrII_392182_T_A_4689	0.403014	3.10806	0.0876068	FALSE
YBR077C	SLM4	chrII_392182_T_A_4689	-0.0835553	1.52673	0.485435	FALSE
YBR079C	RPG1	chrII_394873_G_A_4704	0.00553379	0.274299	0.969006	FALSE
YBR080C	SEC18	chrII_394873_G_A_4704	0.0523829	2.18479	0.268018	FALSE
YBR081C	SPT7	chrII_406688_C_T_4771	-0.220011	0.687701	0.827651	FALSE
YBR082C	UBC4	chrII_406688_C_T_4771	0.00513072	1.43823	0.519578	FALSE
YBR084C-A	RPL19A	chrII_414714_G_A_4816	-0.0355332	1.86239	0.362173	FALSE
YBR084W	MIS1	chrII_414714_G_A_4816	-0.019714	0.418559	0.932649	FALSE
YBR085C-A	YBR085C-A	chrII_414714_G_A_4816	0.037669	0.909647	0.732189	FALSE
YBR086C	IST2	chrII_426299_C_T_4913	0.109638	1.24298	0.594532	FALSE
YBR087W	RFC5	chrII_426299_C_T_4913	-0.0562963	0.40712	0.934218	FALSE
YBR088C	POL30	chrII_426299_C_T_4913	0.0548988	0.249833	0.97304	FALSE
YBR089C-A	NHP6B	chrII_426299_C_T_4913	-0.951965	168.726	0	FALSE
YBR091C	TIM12	chrII_427719_G_A_4923	0.0205319	1.7409	0.405179	FALSE
YBR092C	PHO3	chrII_427719_G_A_4923	-0.561389	10.2017	0	FALSE
YBR093C	PHO5	chrII_427719_G_A_4923	0.0124346	0.646915	0.843867	FALSE
YBR094W	PBY1	chrII_436888_G_A_4978	-0.296831	2.26839	0.244997	FALSE
YBR095C	RXT2	chrII_436888_G_A_4978	0.0998258	1.65632	0.431021	FALSE
YBR096W	YBR096W	chrII_436888_G_A_4978	-0.00130493	0.865713	0.749127	FALSE
YBR097W	VPS15	chrII_436888_G_A_4978	-0.0968391	1.19056	0.619909	FALSE
YBR101C	FES1	chrII_449325_T_C_5027	-0.295974	3.68056	0.0350453	FALSE
YBR102C	EXO84	chrII_449325_T_C_5027	-0.106226	0.453075	0.917319	FALSE
YBR103W	SIF2	chrII_449325_T_C_5027	0.195933	1.10381	0.650176	FALSE
YBR104W	YMC2	chrII_449325_T_C_5027	0.0471129	1.82339	0.376673	FALSE
YBR106W	PHO88	chrII_449325_T_C_5027	-0.0261615	1.31221	0.565014	FALSE
YBR108W	AIM3	chrII_462560_A_G_5109	0.305199	1.57537	0.465451	FALSE
YBR109C	CMD1	chrII_462560_A_G_5109	-0.0715153	1.67725	0.423127	FALSE
YBR110W	ALG1	chrII_462560_A_G_5109	-0.0804673	1.92882	0.338262	FALSE
YBR111C	YSA1	chrII_462560_A_G_5109	0.00375569	0.856005	0.753164	FALSE
YBR111W-A	SUS1	chrII_462560_A_G_5109	-0.11983	1.41553	0.526716	FALSE
YBR112C	CYC8	chrII_462560_A_G_5109	0.201426	1.3247	0.558575	FALSE
YBR114W	RAD16	chrII_469766_T_C_5162	0.04983	0.355451	0.948314	FALSE
YBR115C	LYS2	chrII_469766_T_C_5162	0.2974	6.44049	0.000787402	FALSE
YBR119W	MUD1	chrII_481477_T_C_5229	0.427044	3.60102	0.039726	FALSE
YBR120C	CBP6	chrII_481477_T_C_5229	0.0372878	1.07133	0.665377	FALSE
YBR121C	GRS1	chrII_481477_T_C_5229	-0.083205	1.67086	0.424589	FALSE
YBR122C	MRPL36	chrII_484110_T_C_5237	-0.132535	2.88571	0.114281	FALSE
YBR123C	TFC1	chrII_484110_T_C_5237	-0.304603	1.19564	0.616838	FALSE
YBR125C	PTC4	chrII_489688_G_A_5273	0.0262095	0.294711	0.963221	FALSE
YBR126C	TPS1	chrII_489688_G_A_5273	0.0496566	0.385372	0.940091	FALSE
YBR126W-A	MEO1	chrII_491316_T_C_5283	0.012143	1.87308	0.356892	FALSE
YBR126W-B	YBR126W-B	chrII_491316_T_C_5283	0.152878	1.45484	0.513773	FALSE
YBR127C	VMA2	chrII_491316_T_C_5283	0.364566	20.9166	0	FALSE
YBR129C	OPY1	chrII_491316_T_C_5283	0.0159984	0.133856	0.993442	FALSE
YBR130C	SHE3	chrII_491316_T_C_5283	0.0182558	2.41643	0.209742	FALSE
YBR133C	HSL7	chrII_501537_C_G_5338	-0.516694	3.87513	0.0250337	FALSE
YBR135W	CKS1	chrII_501537_C_G_5338	-0.127048	1.76547	0.397809	FALSE
YBR136W	MEC1	chrII_513777_T_C_5396	0.136312	0.991308	0.696693	FALSE
YBR137W	YBR137W	chrII_513777_T_C_5396	0.00995801	1.71438	0.410658	FALSE
YBR138C	YBR138C	chrII_513777_T_C_5396	0.137512	1.02422	0.685711	FALSE
YBR142W	MAK5	chrII_531175_A_G_5531	-0.072687	2.74639	0.139514	FALSE
YBR143C	SUP45	chrII_531175_A_G_5531	-0.00212467	1.61999	0.445388	FALSE
YBR145W	ADH5	chrII_536135_G_A_5578	-0.789431	14.6695	0	FALSE
YBR146W	MRPS9	chrII_536135_G_A_5578	-0.162323	2.07953	0.293312	FALSE
YBR147W	RTC2	chrII_536135_G_A_5578	0.188425	0.760652	0.794786	FALSE
YBR153W	RIB7	chrII_548176_G_A_5713	-0.136188	0.765896	0.792282	FALSE
YBR154C	RPB5	chrII_548176_G_A_5713	-0.106744	4.54134	0.00753138	FALSE
YBR155W	CNS1	chrII_548176_G_A_5713	-0.0224612	2.24886	0.249123	FALSE
YBR156C	SLI15	chrII_548176_G_A_5713	-0.287154	0.802577	0.775089	FALSE
YBR157C	ICS2	chrII_548176_G_A_5713	0.189488	0.59044	0.864005	FALSE
YBR158W	AMN1	chrII_561879_G_A_5805	-0.144035	1.00405	0.692779	FALSE
YBR159W	IFA38	chrII_561879_G_A_5805	-0.135684	3.19354	0.0740065	FALSE
YBR160W	CDC28	chrII_561879_G_A_5805	-0.136002	0.557933	0.875615	FALSE
YBR161W	CSH1	chrII_561879_G_A_5805	0.0434933	1.03433	0.680579	FALSE
YBR162W-A	YSY6	chrII_565566_A_G_5837	0.276316	22.1826	0	FALSE
YBR163W	EXO5	chrII_565566_A_G_5837	-0.213269	0.91032	0.732062	FALSE
YBR164C	ARL1	chrII_565566_A_G_5837	0.0534542	0.683836	0.828872	FALSE
YBR165W	UBS1	chrII_565566_A_G_5837	0.0487131	0.664998	0.837949	FALSE
YBR166C	TYR1	chrII_565566_A_G_5837	0.247401	3.22703	0.0716994	FALSE
YBR167C	POP7	chrII_565566_A_G_5837	-0.290505	4.15903	0.0183709	FALSE
YBR168W	PEX32	chrII_578423_G_A_5918	0.219693	1.26002	0.587003	FALSE
YBR169C	SSE2	chrII_578423_G_A_5918	-0.214484	1.63272	0.440176	FALSE
YBR170C	NPL4	chrII_578423_G_A_5918	-0.108692	0.640271	0.845415	FALSE
YBR171W	SEC66	chrII_578423_G_A_5918	-0.0665829	0.4776	0.908074	FALSE
YBR176W	ECM31	chrII_584855_G_A_5972	-0.343356	2.68517	0.149727	FALSE
YBR177C	EHT1	chrII_584855_G_A_5972	0.334353	11.4147	0	FALSE
YBR179C	FZO1	chrII_584855_G_A_5972	-0.0696061	1.4194	0.525201	FALSE
YBR181C	RPS6B	chrII_584855_G_A_5972	-0.104134	11.3292	0	FALSE
YBR183W	YPC1	chrII_607269_T_C_6113	0.415373	6.08014	0.00120482	FALSE
YBR185C	MBA1	chrII_607269_T_C_6113	-0.0642249	0.538114	0.882135	FALSE
YBR187W	GDT1	chrII_607269_T_C_6113	2.90443	243.1	0	FALSE
YBR188C	NTC20	chrII_607269_T_C_6113	2.8022	38.8893	0	FALSE
YBR189W	RPS9B	chrII_607269_T_C_6113	-0.0211382	0.462437	0.914373	FALSE
YBR191W	RPL21A	chrII_607269_T_C_6113	-0.00226495	1.10073	0.650808	FALSE
YBR191W-A	YBR191W-A	chrII_607269_T_C_6113	-0.0985636	0.481633	0.906026	FALSE
YBR192W	RIM2	chrII_607269_T_C_6113	0.228228	1.58488	0.46213	FALSE
YBR193C	MED8	chrII_610603_G_T_6158	0.235141	1.14362	0.63666	FALSE
YBR194W	AIM4	chrII_610603_G_T_6158	0.265347	3.23531	0.0711755	FALSE
YBR195C	MSI1	chrII_610603_G_T_6158	0.351323	2.05033	0.300545	FALSE
YBR199W	KTR4	chrII_623785_C_T_6234	-0.11044	1.22513	0.600705	FALSE
YBR200W	BEM1	chrII_623785_C_T_6234	-0.154822	0.419857	0.932506	FALSE
YBR201C-A	YBR201C-A	chrII_623785_C_T_6234	-0.296068	1.17362	0.628436	FALSE
YBR201W	DER1	chrII_623785_C_T_6234	-0.0328101	1.80148	0.38504	FALSE
YBR202W	MCM7	chrII_623785_C_T_6234	0.0330114	2.45265	0.200835	FALSE
YBR203W	COS111	chrII_631870_A_G_6297	0.548403	6.96573	0.000787402	FALSE
YBR204C	LDH1	chrII_631870_A_G_6297	0.0668382	0.258332	0.971249	FALSE
YBR205W	KTR3	chrII_634599_G_A_6314	-0.351693	1.55638	0.472674	FALSE
YBR206W	YBR206W	chrII_634599_G_A_6314	-0.0561295	0.816039	0.770321	FALSE
YBR207W	FTH1	chrII_634599_G_A_6314	0.0662388	0.688029	0.827547	FALSE
YBR208C	DUR1,2	chrII_642313_C_A_6355	-0.0409041	1.40851	0.529161	FALSE
YBR210W	ERV15	chrII_642313_C_A_6355	-0.0943248	1.53639	0.479953	FALSE
YBR211C	AME1	chrII_649970_A_G_6425	-0.219669	1.44601	0.516905	FALSE
YBR212W	NGR1	chrII_649970_A_G_6425	0.250697	2.35707	0.224466	FALSE
YBR213W	MET8	chrII_649970_A_G_6425	-0.165034	1.02964	0.683303	FALSE
YBR214W	SDS24	chrII_649970_A_G_6425	0.093681	2.18673	0.267607	FALSE
YBR215W	HPC2	chrII_649970_A_G_6425	0.116937	1.14541	0.636297	FALSE
YBR216C	YBP1	chrII_649970_A_G_6425	-0.121858	0.937298	0.720535	FALSE
YBR217W	ATG12	chrII_665456_A_G_6501	0.160583	1.678	0.422955	FALSE
YBR218C	PYC2	chrII_665456_A_G_6501	0.106605	2.02302	0.308404	FALSE
YBR221C	PDB1	chrII_665456_A_G_6501	0.0348216	0.63777	0.84617	FALSE
YBR222C	PCS60	chrII_665456_A_G_6501	-0.0491533	1.68224	0.42196	FALSE
YBR227C	MCX1	chrII_679463_A_T_6586	-0.113206	0.541403	0.880936	FALSE
YBR228W	SLX1	chrII_679463_A_T_6586	0.0418204	1.92516	0.339776	FALSE
YBR229C	ROT2	chrII_679463_A_T_6586	0.0108584	0.465082	0.913468	FALSE
YBR230C	OM14	chrII_679463_A_T_6586	0.0115341	0.441182	0.922176	FALSE
YBR230W-A	YBR230W-A	chrII_680493_T_G_6595	-0.0584376	1.2049	0.610963	FALSE
YBR231C	SWC5	chrII_680493_T_G_6595	-0.201379	1.02271	0.686379	FALSE
YBR233W	PBP2	chrII_685662_T_C_6631	0.0880468	0.872263	0.746944	FALSE
YBR233W-A	DAD3	chrII_685662_T_C_6631	-0.101575	0.6209	0.85273	FALSE
YBR234C	ARC40	chrII_685662_T_C_6631	0.0803738	0.902706	0.733388	FALSE
YBR235W	VHC1	chrII_685662_T_C_6631	-0.046277	1.84364	0.368891	FALSE
YBR236C	ABD1	chrII_685662_T_C_6631	0.043841	0.574483	0.870551	FALSE
YBR237W	PRP5	chrII_700300_T_C_6728	-0.112734	0.65729	0.840954	FALSE
YBR239C	ERT1	chrII_700300_T_C_6728	0.000178531	0.901863	0.733533	FALSE
YBR240C	THI2	chrII_700300_T_C_6728	-0.343709	1.78304	0.391213	FALSE
YBR241C	YBR241C	chrII_703256_C_G_6748	0.258748	2.38576	0.217579	FALSE
YBR242W	YBR242W	chrII_703256_C_G_6748	0.239114	1.82979	0.372898	FALSE
YBR243C	ALG7	chrII_708202_C_T_6768	0.194266	1.38782	0.534782	FALSE
YBR244W	GPX2	chrII_708202_C_T_6768	-0.152895	1.12941	0.643461	FALSE
YBR245C	ISW1	chrII_708202_C_T_6768	-0.254794	2.78539	0.132182	FALSE
YBR246W	RRT2	chrII_715254_G_A_6788	-0.101791	0.859394	0.751183	FALSE
YBR247C	ENP1	chrII_715254_G_A_6788	-0.0309073	0.572145	0.871449	FALSE
YBR248C	HIS7	chrII_715254_G_A_6788	-0.0751104	2.36303	0.223592	FALSE
YBR252W	DUT1	chrII_723102_G_C_6801	-0.263077	8.36433	0	FALSE
YBR253W	SRB6	chrII_723102_G_C_6801	0.0317912	1.0796	0.662773	FALSE
YBR254C	TRS20	chrII_723102_G_C_6801	-0.0911356	1.63483	0.439454	FALSE
YBR255C-A	RCF3	chrII_727463_A_T_6813	0.31546	4.12788	0.0189276	FALSE
YBR255W	MTC4	chrII_727463_A_T_6813	-0.542488	3.47637	0.0490141	FALSE
YBR256C	RIB5	chrII_727463_A_T_6813	0.203826	5.03612	0.00310674	FALSE
YBR257W	POP4	chrII_730195_T_C_6823	0.354265	2.24386	0.249834	FALSE
YBR258C	SHG1	chrII_730195_T_C_6823	-0.089967	0.273943	0.969074	FALSE
YBR259W	YBR259W	chrII_730195_T_C_6823	0.454054	3.17922	0.0767537	FALSE
YBR261C	TAE1	chrII_736009_A_G_6840	0.0840792	1.50594	0.491707	FALSE
YBR262C	MIC12	chrII_736009_A_G_6840	0.00416238	2.31172	0.233551	FALSE
YBR263W	SHM1	chrII_738015_T_G_6844	0.127036	1.65307	0.432282	FALSE
YBR264C	YPT10	chrII_738015_T_G_6844	-0.179576	1.34949	0.548368	FALSE
YBR265W	TSC10	chrII_738015_T_G_6844	-0.065221	0.548288	0.878331	FALSE
YBR267W	REI1	chrII_738015_T_G_6844	0.0922532	1.40171	0.530444	FALSE
YBR268W	MRPL37	chrII_738015_T_G_6844	0.129819	1.54352	0.476785	FALSE
YBR269C	SDH8	chrII_738015_T_G_6844	0.125959	1.57589	0.465265	FALSE
YBR270C	BIT2	chrII_738015_T_G_6844	0.20444	0.807467	0.773665	FALSE
YBR271W	EFM2	chrII_738015_T_G_6844	0.0411792	1.0598	0.667879	FALSE
YBR272C	HSM3	chrII_738015_T_G_6844	-0.0302938	2.07448	0.294178	FALSE
YBR273C	UBX7	chrII_738015_T_G_6844	-0.17251	0.875744	0.745549	FALSE
YBR274W	CHK1	chrII_738015_T_G_6844	-0.149101	1.51547	0.490411	FALSE
YBR275C	RIF1	chrII_768745_A_T_7055	-0.0269117	1.36691	0.54188	FALSE
YBR276C	PPS1	chrII_768745_A_T_7055	0.00525465	0.263725	0.970499	FALSE
YBR278W	DPB3	chrII_768745_A_T_7055	0.359887	4.4794	0.00892495	FALSE
YBR279W	PAF1	chrII_768745_A_T_7055	0.0662479	0.723809	0.811818	FALSE
YBR280C	SAF1	chrII_768745_A_T_7055	-0.257889	1.59698	0.456689	FALSE
YBR281C	DUG2	chrII_768745_A_T_7055	0.127148	0.258282	0.971259	FALSE
YBR282W	MRPL27	chrII_768745_A_T_7055	-0.247283	3.0078	0.100306	FALSE
YBR283C	SSH1	chrII_768745_A_T_7055	0.0869711	1.28725	0.577211	FALSE
YBR285W	YBR285W	chrII_777883_C_T_7095	0.232953	0.869441	0.748018	FALSE
YBR286W	APE3	chrII_777883_C_T_7095	-0.0332945	0.260203	0.970876	FALSE
YBR287W	YBR287W	chrII_777883_C_T_7095	-0.18458	4.13556	0.0189091	FALSE
YBR288C	APM3	chrII_777883_C_T_7095	-0.0993467	0.901079	0.733669	FALSE
YBR290W	BSD2	chrII_783778_C_A_7124	-0.299717	3.86982	0.0252836	FALSE
YBR291C	CTP1	chrII_783778_C_A_7124	0.0378541	4.07209	0.0203152	FALSE
YBR293W	VBA2	chrII_783778_C_A_7124	0.312559	0.855024	0.753738	FALSE
YBR294W	SUL1	chrII_783778_C_A_7124	-0.629069	4.60815	0.00685225	FALSE
YBR295W	PCA1	chrII_783778_C_A_7124	0.9125	5.73844	0.00120482	FALSE
YBR297W	MAL33	chrII_810221_C_G_7401	0.318321	3.67987	0.0350462	FALSE
YBR298C	MAL31	chrII_810221_C_G_7401	1.30558	21.6752	0	FALSE
YCL011C	GBP2	chrIII_103955_G_A_8184	-0.0296698	0.326248	0.956395	FALSE
YCL012C	YCL012C	chrIII_103955_G_A_8184	0.00507125	1.11774	0.645813	FALSE
YCL014W	BUD3	chrIII_103955_G_A_8184	-0.085491	1.01988	0.687618	FALSE
YCL016C	DCC1	chrIII_103955_G_A_8184	-0.428966	1.61373	0.447985	FALSE
YCL017C	NFS1	chrIII_103955_G_A_8184	0.236585	1.32241	0.5595	FALSE
YCL018W	LEU2	chrIII_81391_G_A_8062	0.0875799	1.68033	0.422418	FALSE
YCL024W	KCC4	chrIII_81391_G_A_8062	0.00285072	2.36127	0.223977	FALSE
YCL026C-B	HBN1	chrIII_73403_C_T_8020	1.24136	70.9592	0	FALSE
YCL027W	FUS1	chrIII_73403_C_T_8020	0.283691	1.70338	0.414115	FALSE
YCL035C	GRX1	chrIII_60687_T_C_7941	0.0577698	0.772322	0.789334	FALSE
YCL036W	GFD2	chrIII_60687_T_C_7941	0.6317	2.80698	0.128065	FALSE
YCL037C	SRO9	chrIII_56873_G_A_7924	0.296925	1.29323	0.575038	FALSE
YCL038C	ATG22	chrIII_56873_G_A_7924	0.255324	1.80005	0.385494	FALSE
YCL047C	POF1	chrIII_42410_G_C_7861	0.419593	3.6822	0.0350453	FALSE
YCL048W	SPS22	chrIII_42410_G_C_7861	-0.702748	3.63387	0.037408	FALSE
YCL049C	YCL049C	chrIII_42410_G_C_7861	-1.32854	41.7372	0	FALSE
YCL050C	APA1	chrIII_42410_G_C_7861	0.114288	3.80243	0.028944	FALSE
YCL052C	PBN1	chrIII_30991_T_C_7795	0.116163	0.620328	0.852992	FALSE
YCL054W-A	RDT1	chrIII_30991_T_C_7795	-0.268094	2.3567	0.224492	FALSE
YCL059C	KRR1	chrIII_22397_G_A_7730	-0.24469	2.02351	0.308282	FALSE
YCL061C	MRC1	chrIII_22397_G_A_7730	0.360472	3.05704	0.0954212	FALSE
YCR004C	YCP4	chrIII_119638_T_A_8304	0.0480264	2.05017	0.300581	FALSE
YCR005C	CIT2	chrIII_119638_T_A_8304	0.0796895	2.98899	0.103793	FALSE
YCR015C	CTO1	chrIII_142451_G_A_8422	-0.186455	1.75754	0.400332	FALSE
YCR017C	CWH43	chrIII_142451_G_A_8422	-0.0838529	1.51665	0.490286	FALSE
YCR023C	YCR023C	chrIII_160421_T_G_8543	-0.208715	2.42595	0.207289	FALSE
YCR024C	SLM5	chrIII_160421_T_G_8543	-0.354176	0.851512	0.755792	FALSE
YCR024C-A	PMP1	chrIII_160421_T_G_8543	-0.0121342	0.806864	0.773841	FALSE
YCR024C-B	YCR024C-B	chrIII_160421_T_G_8543	-0.00471945	2.16709	0.270936	FALSE
YCR026C	NPP1	chrIII_169812_G_T_8608	-0.175392	1.42034	0.524885	FALSE
YCR027C	RHB1	chrIII_169812_G_T_8608	-0.488956	3.23915	0.0710054	FALSE
YCR028C-A	RIM1	chrIII_173853_G_A_8634	0.124872	1.50059	0.492654	FALSE
YCR030C	SYP1	chrIII_173853_G_A_8634	-1.00635	9.85187	0	FALSE
YCR031C	RPS14A	chrIII_176637_G_A_8648	0.141147	2.91588	0.110704	FALSE
YCR032W	BPH1	chrIII_176637_G_A_8648	0.104577	1.23382	0.597693	FALSE
YCR033W	SNT1	chrIII_191536_C_T_8719	-0.0162752	0.516409	0.890783	FALSE
YCR035C	RRP43	chrIII_191536_C_T_8719	-0.394552	3.75263	0.0327758	FALSE
YCR037C	PHO87	chrIII_191536_C_T_8719	-0.968756	12.1643	0	FALSE
YCR038C	BUD5	chrIII_204174_T_C_8794	0.312437	0.617967	0.853734	FALSE
YCR039C	MATALPHA2	chrIII_204174_T_C_8794	-0.0536228	0.653947	0.841961	FALSE
YCR042C	TAF2	chrIII_204174_T_C_8794	-0.658554	2.09997	0.28866	FALSE
YCR043C	YCR043C	chrIII_204174_T_C_8794	-0.768146	17.4495	0	FALSE
YCR044C	PER1	chrIII_204174_T_C_8794	-0.169596	1.02645	0.68472	FALSE
YCR046C	IMG1	chrIII_212528_A_T_8868	-0.335067	2.27771	0.243009	FALSE
YCR047C	BUD23	chrIII_212528_A_T_8868	-0.255391	1.91368	0.343445	FALSE
YCR054C	CTR86	chrIII_224288_A_G_8921	-0.295793	4.61275	0.00676538	FALSE
YCR057C	PWP2	chrIII_224288_A_G_8921	0.168489	2.8829	0.11436	FALSE
YCR059C	YIH1	chrIII_224288_A_G_8921	-0.0831911	0.404072	0.934876	FALSE
YCR060W	TAH1	chrIII_224288_A_G_8921	0.509101	6.42369	0.000787402	FALSE
YCR067C	SED4	chrIII_240075_C_A_9069	0.174304	0.420635	0.932251	FALSE
YCR071C	IMG2	chrIII_240075_C_A_9069	0.0878381	0.554448	0.876523	FALSE
YCR072C	RSA4	chrIII_240075_C_A_9069	-0.0622283	0.140935	0.992691	FALSE
YCR076C	FUB1	chrIII_249285_A_C_9120	0.164038	0.762694	0.793811	FALSE
YCR077C	PAT1	chrIII_249285_A_C_9120	0.0149011	1.39329	0.532846	FALSE
YCR083W	TRX3	chrIII_249285_A_C_9120	-0.0397854	0.297303	0.962718	FALSE
YCR084C	TUP1	chrIII_249285_A_C_9120	-0.0740146	1.09223	0.656024	FALSE
YCR087C-A	YCR087C-A	chrIII_249285_A_C_9120	-0.0198843	0.528111	0.885898	FALSE
YCR089W	FIG2	chrIII_249285_A_C_9120	0.269194	1.73184	0.406966	FALSE
YCR090C	YCR090C	chrIII_292449_C_T_9433	0.0860074	1.21031	0.607449	FALSE
YCR092C	MSH3	chrIII_292449_C_T_9433	0.373746	3.29803	0.0656339	FALSE
YCR093W	CDC39	chrIII_292449_C_T_9433	-0.0599486	0.294097	0.963339	FALSE
YCR095C	OCA4	chrIII_292449_C_T_9433	-0.0693442	0.761619	0.794324	FALSE
YCR097W	HMRA1	chrIII_292449_C_T_9433	-0.0910737	2.90809	0.111601	FALSE
YCR102C	YCR102C	chrIII_303795_C_T_9579	-0.847801	8.07481	0	FALSE
YCR105W	ADH7	chrIII_303795_C_T_9579	0.673676	1.70257	0.414437	FALSE
YDL001W	RMD1	chrIV_454817_T_C_12628	0.250099	0.813357	0.771479	FALSE
YDL002C	NHP10	chrIV_454817_T_C_12628	0.220361	0.911182	0.731887	FALSE
YDL003W	MCD1	chrIV_454817_T_C_12628	0.0225986	1.44995	0.515578	FALSE
YDL004W	ATP16	chrIV_433257_A_G_12493	-0.0373398	0.880333	0.743673	FALSE
YDL005C	MED2	chrIV_433257_A_G_12493	-0.245836	2.22618	0.255595	FALSE
YDL006W	PTC1	chrIV_433257_A_G_12493	-0.15217	0.906794	0.732682	FALSE
YDL007W	RPT2	chrIV_433257_A_G_12493	-0.145387	4.09617	0.0195991	FALSE
YDL008W	APC11	chrIV_433257_A_G_12493	0.443488	9.75123	0	FALSE
YDL010W	GRX6	chrIV_433257_A_G_12493	-0.407805	4.37721	0.0111024	FALSE
YDL012C	YDL012C	chrIV_433257_A_G_12493	0.130837	1.65337	0.432169	FALSE
YDL013W	SLX5	chrIV_428558_T_C_12467	0.0281694	0.976233	0.703872	FALSE
YDL014W	NOP1	chrIV_428558_T_C_12467	0.0245097	0.874447	0.746069	FALSE
YDL015C	TSC13	chrIV_425888_C_T_12459	0.0594956	2.53795	0.176368	FALSE
YDL016C	YDL016C	chrIV_425888_C_T_12459	-0.209584	0.779283	0.786369	FALSE
YDL017W	CDC7	chrIV_425888_C_T_12459	0.104049	2.44344	0.202404	FALSE
YDL020C	RPN4	chrIV_415090_T_C_12387	0.164418	1.5547	0.473123	FALSE
YDL021W	GPM2	chrIV_415090_T_C_12387	0.174156	0.567898	0.872862	FALSE
YDL022W	GPD1	chrIV_415090_T_C_12387	-0.0631813	1.99924	0.31407	FALSE
YDL025C	RTK1	chrIV_400864_A_G_12305	0.0107487	0.653543	0.842082	FALSE
YDL027C	MRX9	chrIV_400864_A_G_12305	0.211797	1.95849	0.326447	FALSE
YDL028C	MPS1	chrIV_400864_A_G_12305	0.121164	1.40284	0.53023	FALSE
YDL029W	ARP2	chrIV_400864_A_G_12305	0.0469724	0.357147	0.947701	FALSE
YDL030W	PRP9	chrIV_400864_A_G_12305	0.0590814	0.357183	0.947688	FALSE
YDL031W	DBP10	chrIV_400864_A_G_12305	0.270471	1.73105	0.407114	FALSE
YDL035C	GPR1	chrIV_400864_A_G_12305	-0.183904	1.00539	0.692239	FALSE
YDL036C	PUS9	chrIV_400864_A_G_12305	0.115087	0.967	0.707147	FALSE
YDL040C	NAT1	chrIV_372433_T_A_12110	-0.253083	2.28384	0.241796	FALSE
YDL042C	SIR2	chrIV_372433_T_A_12110	0.314322	2.29428	0.240007	FALSE
YDL044C	MTF2	chrIV_372433_T_A_12110	-0.0435787	0.406649	0.934319	FALSE
YDL045C	FAD1	chrIV_372433_T_A_12110	0.00421727	0.64256	0.844882	FALSE
YDL045W-A	MRP10	chrIV_372433_T_A_12110	0.252385	5.19562	0.00204604	FALSE
YDL046W	NPC2	chrIV_371383_C_T_12098	0.226553	6.38959	0.000787402	FALSE
YDL047W	SIT4	chrIV_371383_C_T_12098	0.195871	0.998608	0.694774	FALSE
YDL049C	KNH1	chrIV_364908_T_C_12047	-0.705762	6.35133	0.000787402	FALSE
YDL051W	LHP1	chrIV_364908_T_C_12047	-0.0217714	0.999352	0.694578	FALSE
YDL053C	PBP4	chrIV_361612_T_A_12042	0.0751814	1.51197	0.49078	FALSE
YDL054C	MCH1	chrIV_361612_T_A_12042	-0.255632	2.81799	0.125944	FALSE
YDL055C	PSA1	chrIV_355569_T_C_11994	-0.321838	20.0164	0	FALSE
YDL056W	MBP1	chrIV_355569_T_C_11994	-0.130546	1.32582	0.55812	FALSE
YDL057W	YDL057W	chrIV_355569_T_C_11994	-0.258384	1.25444	0.589559	FALSE
YDL058W	USO1	chrIV_355569_T_C_11994	-0.110267	1.58353	0.462597	FALSE
YDL059C	RAD59	chrIV_355569_T_C_11994	0.00476596	1.93341	0.336275	FALSE
YDL060W	TSR1	chrIV_355569_T_C_11994	-0.31731	3.41559	0.0544362	FALSE
YDL061C	RPS29B	chrIV_329842_T_C_11857	-0.0125692	0.388132	0.939866	FALSE
YDL063C	SYO1	chrIV_329842_T_C_11857	-0.30161	1.97458	0.321594	FALSE
YDL064W	UBC9	chrIV_329842_T_C_11857	0.210668	3.71127	0.0342821	FALSE
YDL065C	PEX19	chrIV_329842_T_C_11857	0.0390047	0.537036	0.882516	FALSE
YDL066W	IDP1	chrIV_329842_T_C_11857	-0.211665	4.94484	0.00379147	FALSE
YDL067C	COX9	chrIV_329842_T_C_11857	0.0502819	2.32525	0.229993	FALSE
YDL068W	YDL068W	chrIV_329842_T_C_11857	0.355369	1.74089	0.405184	FALSE
YDL069C	CBS1	chrIV_329842_T_C_11857	0.0656938	0.683391	0.829013	FALSE
YDL070W	BDF2	chrIV_329842_T_C_11857	0.0249554	1.25936	0.587306	FALSE
YDL072C	YET3	chrIV_329842_T_C_11857	0.0266919	0.784736	0.783712	FALSE
YDL073W	AHK1	chrIV_329842_T_C_11857	-0.157578	1.36673	0.54195	FALSE
YDL074C	BRE1	chrIV_320785_G_A_11785	0.0577391	0.744594	0.80224	FALSE
YDL075W	RPL31A	chrIV_320785_G_A_11785	0.0120312	1.09975	0.651123	FALSE
YDL076C	RXT3	chrIV_320785_G_A_11785	0.106341	0.931682	0.723094	FALSE
YDL077C	VAM6	chrIV_320785_G_A_11785	-0.0608042	0.443162	0.921296	FALSE
YDL078C	MDH3	chrIV_315309_A_G_11746	0.0470893	1.90609	0.345157	FALSE
YDL080C	THI3	chrIV_315309_A_G_11746	0.222387	1.44135	0.518475	FALSE
YDL081C	RPP1A	chrIV_306463_C_T_11685	-0.0114481	1.7802	0.392004	FALSE
YDL082W	RPL13A	chrIV_306463_C_T_11685	0.0128489	3.74246	0.0328173	FALSE
YDL083C	RPS16B	chrIV_306463_C_T_11685	0.0862607	8.08235	0	FALSE
YDL084W	SUB2	chrIV_306463_C_T_11685	-0.00991806	1.06979	0.665838	FALSE
YDL085C-A	YDL085C-A	chrIV_302207_C_T_11660	-0.414521	10.8575	0	FALSE
YDL086W	YDL086W	chrIV_302207_C_T_11660	-0.596129	16.0469	0	FALSE
YDL088C	ASM4	chrIV_302207_C_T_11660	-0.196551	3.00292	0.100472	FALSE
YDL089W	NUR1	chrIV_302207_C_T_11660	-0.043259	0.64987	0.843179	FALSE
YDL090C	RAM1	chrIV_292985_A_G_11622	-0.051973	0.405763	0.934511	FALSE
YDL091C	UBX3	chrIV_292985_A_G_11622	-0.0628939	3.39337	0.0564384	FALSE
YDL092W	SRP14	chrIV_292985_A_G_11622	0.176208	3.54645	0.0427919	FALSE
YDL093W	PMT5	chrIV_292985_A_G_11622	-0.117904	1.86389	0.361352	FALSE
YDL097C	RPN6	chrIV_285562_G_A_11591	0.186233	4.23978	0.0162326	FALSE
YDL098C	SNU23	chrIV_285562_G_A_11591	0.253437	1.15855	0.633048	FALSE
YDL099W	BUG1	chrIV_285562_G_A_11591	-0.166871	0.640871	0.845275	FALSE
YDL100C	GET3	chrIV_282145_G_A_11574	0.0514348	2.02658	0.30751	FALSE
YDL101C	DUN1	chrIV_282145_G_A_11574	-0.111747	1.57922	0.464096	FALSE
YDL103C	QRI1	chrIV_282145_G_A_11574	0.134763	1.75633	0.400665	FALSE
YDL106C	PHO2	chrIV_263532_T_A_11457	-0.189599	0.946445	0.716342	FALSE
YDL107W	MSS2	chrIV_263532_T_A_11457	0.0601468	2.50001	0.188389	FALSE
YDL108W	KIN28	chrIV_263532_T_A_11457	-0.0943973	1.46841	0.509829	FALSE
YDL110C	TMA17	chrIV_263532_T_A_11457	-0.103983	1.84269	0.36898	FALSE
YDL111C	RRP42	chrIV_263532_T_A_11457	0.0653495	0.425796	0.930302	FALSE
YDL112W	TRM3	chrIV_263532_T_A_11457	-0.0571241	0.537288	0.882427	FALSE
YDL113C	ATG20	chrIV_263532_T_A_11457	-0.0280411	0.263221	0.970553	FALSE
YDL115C	IWR1	chrIV_263532_T_A_11457	0.11058	1.99826	0.314335	FALSE
YDL116W	NUP84	chrIV_243004_G_A_11349	0.0145545	1.73922	0.405599	FALSE
YDL117W	CYK3	chrIV_243004_G_A_11349	0.36246	3.05153	0.0964148	FALSE
YDL119C	HEM25	chrIV_243004_G_A_11349	0.402557	1.58356	0.462587	FALSE
YDL120W	YFH1	chrIV_243004_G_A_11349	-0.058237	0.765124	0.792651	FALSE
YDL121C	YDL121C	chrIV_243004_G_A_11349	-0.0927794	1.62482	0.443324	FALSE
YDL122W	UBP1	chrIV_243004_G_A_11349	-0.0775176	1.40968	0.528942	FALSE
YDL123W	SNA4	chrIV_243004_G_A_11349	0.177187	1.18417	0.623006	FALSE
YDL124W	YDL124W	chrIV_238952_A_G_11319	0.292049	5.26267	0.00204604	FALSE
YDL125C	HNT1	chrIV_238952_A_G_11319	0.190371	9.64411	0	FALSE
YDL127W	PCL2	chrIV_235466_T_A_11309	-0.260079	2.22218	0.256345	FALSE
YDL128W	VCX1	chrIV_235466_T_A_11309	0.0743858	1.73697	0.406016	FALSE
YDL130W-A	STF1	chrIV_229444_A_G_11269	0.4183	15.3154	0	FALSE
YDL131W	LYS21	chrIV_229444_A_G_11269	0.337172	12.223	0	FALSE
YDL132W	CDC53	chrIV_221899_T_A_11233	-0.261067	4.40633	0.0106931	FALSE
YDL133C-A	RPL41B	chrIV_221899_T_A_11233	-0.0554255	3.36388	0.0590686	FALSE
YDL133W	SRF1	chrIV_221899_T_A_11233	-0.177905	1.83306	0.371689	FALSE
YDL134C	PPH21	chrIV_218767_A_G_11223	-0.0776698	1.75188	0.401891	FALSE
YDL135C	RDI1	chrIV_218767_A_G_11223	-0.0370142	1.5361	0.480102	FALSE
YDL137W	ARF2	chrIV_216140_A_G_11196	0.191058	11.1803	0	FALSE
YDL138W	RGT2	chrIV_216140_A_G_11196	-0.0770456	1.06833	0.66613	FALSE
YDL140C	RPO21	chrIV_205310_A_G_11133	0.0498491	0.972409	0.705297	FALSE
YDL141W	BPL1	chrIV_205310_A_G_11133	-0.2091	1.44996	0.515574	FALSE
YDL142C	CRD1	chrIV_205310_A_G_11133	-0.00325832	0.560326	0.874984	FALSE
YDL143W	CCT4	chrIV_205310_A_G_11133	0.0523897	3.48436	0.0490141	FALSE
YDL144C	YDL144C	chrIV_205310_A_G_11133	0.14733	0.943668	0.717618	FALSE
YDL145C	COP1	chrIV_192247_T_C_11067	-0.12582	2.08938	0.29122	FALSE
YDL146W	LDB17	chrIV_192247_T_C_11067	0.0805097	0.720254	0.813063	FALSE
YDL147W	RPN5	chrIV_192247_T_C_11067	-0.179082	3.62156	0.0383161	FALSE
YDL148C	NOP14	chrIV_192247_T_C_11067	-0.0643708	1.87631	0.355722	FALSE
YDL149W	ATG9	chrIV_192247_T_C_11067	-0.206999	0.980504	0.702194	FALSE
YDL150W	RPC53	chrIV_192247_T_C_11067	-0.0458443	0.840966	0.759178	FALSE
YDL153C	SAS10	chrIV_174272_T_G_10965	0.127814	1.35934	0.544767	FALSE
YDL155W	CLB3	chrIV_174272_T_G_10965	0.0520106	0.296913	0.962793	FALSE
YDL157C	YDL157C	chrIV_174272_T_G_10965	-0.0958835	1.84288	0.368962	FALSE
YDL159W	STE7	chrIV_172522_G_A_10959	0.348626	3.90383	0.0244224	FALSE
YDL160C-A	MHF2	chrIV_172522_G_A_10959	-0.135085	1.92166	0.341225	FALSE
YDL161W	ENT1	chrIV_172522_G_A_10959	-0.12899	1.11548	0.646715	FALSE
YDL164C	CDC9	chrIV_163443_G_C_10901	0.23872	2.50643	0.186612	FALSE
YDL165W	CDC36	chrIV_163443_G_C_10901	0.45937	9.73422	0	FALSE
YDL166C	FAP7	chrIV_163443_G_C_10901	0.0865621	1.4152	0.526844	FALSE
YDL169C	UGX2	chrIV_159505_T_C_10883	0.0203009	0.33738	0.953951	FALSE
YDL170W	UGA3	chrIV_159505_T_C_10883	-0.0180632	1.12752	0.643752	FALSE
YDL171C	GLT1	chrIV_159505_T_C_10883	-0.0620753	1.14138	0.637113	FALSE
YDL173W	PAR32	chrIV_143484_A_G_10850	0.13838	0.770256	0.790214	FALSE
YDL174C	DLD1	chrIV_143484_A_G_10850	0.105979	2.29764	0.239515	FALSE
YDL175C	AIR2	chrIV_143484_A_G_10850	-0.0588331	0.477447	0.908149	FALSE
YDL176W	YDL176W	chrIV_143484_A_G_10850	0.0133588	1.20287	0.612304	FALSE
YDL177C	YDL177C	chrIV_143484_A_G_10850	0.207294	1.03034	0.682941	FALSE
YDL178W	DLD2	chrIV_143484_A_G_10850	-0.082828	2.27082	0.244477	FALSE
YDL179W	PCL9	chrIV_136920_T_C_10837	0.119664	0.980033	0.702449	FALSE
YDL180W	YDL180W	chrIV_136920_T_C_10837	-0.186551	1.78375	0.391016	FALSE
YDL184C	RPL41A	chrIV_126981_C_T_10800	-0.0617183	3.85669	0.0254943	FALSE
YDL185W	VMA1	chrIV_126981_C_T_10800	0.0390863	1.46467	0.510737	FALSE
YDL188C	PPH22	chrIV_125401_A_T_10795	-0.0983822	1.54773	0.47522	FALSE
YDL189W	RBS1	chrIV_125401_A_T_10795	0.00883238	0.935977	0.721137	FALSE
YDL190C	UFD2	chrIV_117248_C_T_10736	0.463194	3.6848	0.0350453	FALSE
YDL191W	RPL35A	chrIV_117248_C_T_10736	-0.0501894	3.92944	0.0235427	FALSE
YDL192W	ARF1	chrIV_117248_C_T_10736	-0.0203555	2.77517	0.134844	FALSE
YDL193W	NUS1	chrIV_117248_C_T_10736	-0.072704	1.37869	0.538404	FALSE
YDL195W	SEC31	chrIV_103632_C_G_10639	0.0147059	0.870304	0.747729	FALSE
YDL198C	GGC1	chrIV_103632_C_G_10639	0.102218	1.04579	0.674198	FALSE
YDL200C	MGT1	chrIV_103632_C_G_10639	-0.075926	1.22567	0.600501	FALSE
YDL201W	TRM8	chrIV_103632_C_G_10639	0.113027	1.63649	0.438884	FALSE
YDL202W	MRPL11	chrIV_96121_G_A_10560	0.106474	0.305413	0.96141	FALSE
YDL203C	ACK1	chrIV_96121_G_A_10560	0.0571901	1.49475	0.496457	FALSE
YDL204W	RTN2	chrIV_96121_G_A_10560	0.117036	2.35679	0.224485	FALSE
YDL205C	HEM3	chrIV_92364_T_C_10544	-0.309614	0.937087	0.720631	FALSE
YDL206W	YDL206W	chrIV_92364_T_C_10544	-0.0230448	1.71301	0.410922	FALSE
YDL207W	GLE1	chrIV_88023_A_T_10512	0.057376	0.846285	0.757705	FALSE
YDL208W	NHP2	chrIV_88023_A_T_10512	0.0163273	1.1688	0.630665	FALSE
YDL211C	YDL211C	chrIV_78875_T_A_10437	0.151786	0.530721	0.884751	FALSE
YDL212W	SHR3	chrIV_78875_T_A_10437	0.119094	3.52122	0.044784	FALSE
YDL213C	NOP6	chrIV_77397_G_A_10430	0.225445	2.17877	0.26918	FALSE
YDL215C	GDH2	chrIV_77397_G_A_10430	-0.185264	2.93864	0.108128	FALSE
YDL216C	RRI1	chrIV_65891_G_A_10322	0.163037	1.10369	0.650201	FALSE
YDL217C	TIM22	chrIV_65891_G_A_10322	0.0395553	2.04603	0.302356	FALSE
YDL219W	DTD1	chrIV_65891_G_A_10322	-0.863761	52.1117	0	FALSE
YDL224C	WHI4	chrIV_48046_A_G_10122	-0.744235	9.70136	0	FALSE
YDL225W	SHS1	chrIV_48046_A_G_10122	0.0310749	2.97909	0.105166	FALSE
YDL226C	GCS1	chrIV_48046_A_G_10122	-0.0839668	0.426386	0.930079	FALSE
YDL229W	SSB1	chrIV_48046_A_G_10122	0.106489	6.33493	0.000787402	FALSE
YDL230W	PTP1	chrIV_38604_T_C_10045	-0.419871	2.77053	0.136031	FALSE
YDL231C	BRE4	chrIV_38604_T_C_10045	-0.204742	3.17663	0.0772064	FALSE
YDL232W	OST4	chrIV_38604_T_C_10045	0.241255	14.3957	0	FALSE
YDL233W	MFG1	chrIV_38604_T_C_10045	-0.548086	4.02529	0.021231	FALSE
YDL235C	YPD1	chrIV_33191_A_G_10007	-0.048949	1.55628	0.472702	FALSE
YDL236W	PHO13	chrIV_33191_A_G_10007	-0.230684	4.60264	0.00685225	FALSE
YDL237W	AIM6	chrIV_33191_A_G_10007	0.203835	4.16874	0.0183486	FALSE
YDL239C	ADY3	chrIV_33191_A_G_10007	0.305885	1.38399	0.536385	FALSE
YDL240W	LRG1	chrIV_18702_A_C_9797	0.0713655	0.851574	0.755756	FALSE
YDL243C	AAD4	chrIV_18702_A_C_9797	-0.15052	1.19511	0.617154	FALSE
YDL248W	COS7	chrIV_18702_A_C_9797	0.279322	4.11752	0.0189964	FALSE
YDR001C	NTH1	chrIV_454817_T_C_12628	-0.0652502	1.00399	0.692805	FALSE
YDR002W	YRB1	chrIV_454817_T_C_12628	-0.046206	2.11178	0.284468	FALSE
YDR003W-A	YDR003W-A	chrIV_454817_T_C_12628	0.426489	4.70225	0.0044843	FALSE
YDR004W	RAD57	chrIV_454817_T_C_12628	0.219983	0.839258	0.759817	FALSE
YDR005C	MAF1	chrIV_454817_T_C_12628	0.0641776	1.65411	0.43188	FALSE
YDR006C	SOK1	chrIV_462515_A_T_12654	-0.0536014	0.752357	0.798476	FALSE
YDR007W	TRP1	chrIV_462515_A_T_12654	0.140699	2.53963	0.175544	FALSE
YDR011W	SNQ2	chrIV_472584_G_A_12701	-0.0137065	1.07354	0.664683	FALSE
YDR012W	RPL4B	chrIV_472584_G_A_12701	-0.0672939	2.33205	0.228742	FALSE
YDR013W	PSF1	chrIV_472584_G_A_12701	-0.166803	1.5196	0.489973	FALSE
YDR016C	DAD1	chrIV_484026_A_G_12762	0.0606036	1.12686	0.643854	FALSE
YDR017C	KCS1	chrIV_484026_A_G_12762	0.069242	1.99698	0.314678	FALSE
YDR019C	GCV1	chrIV_484026_A_G_12762	0.156573	1.50802	0.491338	FALSE
YDR021W	FAL1	chrIV_484026_A_G_12762	-0.16086	0.460949	0.914883	FALSE
YDR022C	ATG31	chrIV_484026_A_G_12762	0.0432641	0.216952	0.979817	FALSE
YDR023W	SES1	chrIV_484026_A_G_12762	-0.080095	1.72348	0.408791	FALSE
YDR025W	RPS11A	chrIV_484026_A_G_12762	0.0129149	1.06583	0.666628	FALSE
YDR026C	NSI1	chrIV_484026_A_G_12762	0.103761	1.11891	0.645347	FALSE
YDR027C	VPS54	chrIV_504046_C_T_12821	-0.0544917	1.07735	0.663481	FALSE
YDR028C	REG1	chrIV_504046_C_T_12821	0.135219	0.772982	0.789052	FALSE
YDR031W	MIX14	chrIV_504046_C_T_12821	-0.022791	0.336518	0.954101	FALSE
YDR032C	PST2	chrIV_504046_C_T_12821	-0.240014	10.0958	0	FALSE
YDR034W-B	YDR034W-B	chrIV_520212_A_G_12954	-1.20594	51.6757	0	TRUE
YDR035W	ARO3	chrIV_520212_A_G_12954	0.955387	47.7473	0	FALSE
YDR036C	EHD3	chrIV_526927_G_A_13339	2.15523	24.8776	0	FALSE
YDR037W	KRS1	chrIV_526927_G_A_13339	0.0792462	1.74664	0.403431	FALSE
YDR041W	RSM10	chrIV_542914_C_T_13450	0.058645	1.20118	0.613419	FALSE
YDR043C	NRG1	chrIV_542914_C_T_13450	-0.0585643	1.52566	0.48615	FALSE
YDR044W	HEM13	chrIV_547830_G_C_13464	-0.314188	3.24572	0.0709677	FALSE
YDR045C	RPC11	chrIV_547830_G_C_13464	0.561656	17.659	0	FALSE
YDR047W	HEM12	chrIV_552354_T_C_13492	-0.251348	2.52985	0.180287	FALSE
YDR049W	VMS1	chrIV_552354_T_C_13492	-0.336297	1.21028	0.60746	FALSE
YDR050C	TPI1	chrIV_557923_A_G_13530	-0.0787297	7.38829	0.000787402	FALSE
YDR051C	DET1	chrIV_557923_A_G_13530	-0.219806	1.5582	0.472188	FALSE
YDR052C	DBF4	chrIV_557923_A_G_13530	-0.148584	0.4203	0.932377	FALSE
YDR055W	PST1	chrIV_564879_C_T_13553	-0.0202597	2.38912	0.216253	FALSE
YDR056C	EMC10	chrIV_564879_C_T_13553	0.0752058	0.916244	0.730855	FALSE
YDR057W	YOS9	chrIV_565196_T_C_13555	-0.0711139	0.318576	0.958668	FALSE
YDR058C	TGL2	chrIV_565196_T_C_13555	0.146687	0.654263	0.841866	FALSE
YDR059C	UBC5	chrIV_565196_T_C_13555	-0.0907967	1.50499	0.491875	FALSE
YDR060W	MAK21	chrIV_565196_T_C_13555	0.024283	1.01982	0.687633	FALSE
YDR061W	YDR061W	chrIV_565196_T_C_13555	0.0904835	0.958325	0.710262	FALSE
YDR062W	LCB2	chrIV_588809_G_A_13690	-0.0229665	1.08596	0.659567	FALSE
YDR063W	AIM7	chrIV_588809_G_A_13690	-0.113436	0.563422	0.874117	FALSE
YDR064W	RPS13	chrIV_588809_G_A_13690	-0.0325249	1.0424	0.675972	FALSE
YDR066C	RTR2	chrIV_588809_G_A_13690	0.210333	1.24032	0.595647	FALSE
YDR067C	OCA6	chrIV_588809_G_A_13690	-0.00365166	0.368792	0.944417	FALSE
YDR068W	DOS2	chrIV_588809_G_A_13690	-0.124017	2.78658	0.131868	FALSE
YDR069C	DOA4	chrIV_588809_G_A_13690	0.117338	0.836931	0.760979	FALSE
YDR070C	FMP16	chrIV_588809_G_A_13690	-0.306284	2.07317	0.294405	FALSE
YDR071C	PAA1	chrIV_588809_G_A_13690	0.0768964	1.84148	0.369093	FALSE
YDR072C	IPT1	chrIV_590018_T_C_13698	-0.0570596	0.736111	0.806536	FALSE
YDR073W	SNF11	chrIV_590018_T_C_13698	-0.20881	1.90453	0.345484	FALSE
YDR074W	TPS2	chrIV_590018_T_C_13698	0.29813	5.93397	0.00120482	FALSE
YDR075W	PPH3	chrIV_600978_A_T_13790	0.0894802	0.479862	0.90697	FALSE
YDR077W	SED1	chrIV_600978_A_T_13790	-0.209252	11.0709	0	FALSE
YDR079C-A	TFB5	chrIV_603579_T_A_13801	0.259219	7.62813	0.000787402	FALSE
YDR079W	PET100	chrIV_603579_T_A_13801	-0.0314279	1.01266	0.689642	FALSE
YDR080W	VPS41	chrIV_603579_T_A_13801	0.179513	1.28247	0.577828	FALSE
YDR081C	PDC2	chrIV_603579_T_A_13801	0.100772	0.962642	0.708529	FALSE
YDR082W	STN1	chrIV_614061_C_T_13870	-0.0790434	1.31256	0.56481	FALSE
YDR083W	RRP8	chrIV_614061_C_T_13870	0.121281	0.886506	0.74052	FALSE
YDR084C	TVP23	chrIV_614061_C_T_13870	0.173438	3.0425	0.0973133	FALSE
YDR085C	AFR1	chrIV_614061_C_T_13870	0.539759	8.61284	0	FALSE
YDR086C	SSS1	chrIV_617421_A_C_13899	-0.117483	6.55992	0.000787402	FALSE
YDR087C	RRP1	chrIV_617421_A_C_13899	0.104257	0.393839	0.938194	FALSE
YDR089W	VTC5	chrIV_624920_T_G_13953	-0.419491	4.06969	0.0203152	FALSE
YDR091C	RLI1	chrIV_624920_T_G_13953	0.11528	1.44326	0.51783	FALSE
YDR092W	UBC13	chrIV_630621_T_C_14006	0.218099	2.67711	0.151014	FALSE
YDR096W	GIS1	chrIV_630621_T_C_14006	0.0846332	1.89007	0.348988	FALSE
YDR097C	MSH6	chrIV_630621_T_C_14006	-0.304455	1.45208	0.514791	FALSE
YDR098C	GRX3	chrIV_655491_G_A_14128	-0.00298694	0.583225	0.867027	FALSE
YDR099W	BMH2	chrIV_655491_G_A_14128	-0.00906826	0.981775	0.701504	FALSE
YDR100W	TVP15	chrIV_655491_G_A_14128	-0.093068	1.29799	0.572353	FALSE
YDR101C	ARX1	chrIV_655491_G_A_14128	-0.0408788	0.698349	0.822933	FALSE
YDR103W	STE5	chrIV_655491_G_A_14128	0.307485	1.05644	0.669292	FALSE
YDR105C	TMS1	chrIV_675982_A_G_14247	0.0322975	1.64978	0.433568	FALSE
YDR107C	TMN2	chrIV_675982_A_G_14247	0.471433	2.05609	0.299274	FALSE
YDR108W	TRS85	chrIV_675982_A_G_14247	-0.0591163	0.842509	0.758751	FALSE
YDR109C	YDR109C	chrIV_675982_A_G_14247	-0.174542	1.57581	0.465297	FALSE
YDR110W	FOB1	chrIV_675982_A_G_14247	0.272735	1.50578	0.491735	FALSE
YDR111C	ALT2	chrIV_675982_A_G_14247	-0.433548	2.28108	0.242316	FALSE
YDR113C	PDS1	chrIV_682509_C_G_14295	0.149019	2.84155	0.121954	FALSE
YDR115W	MRX14	chrIV_682509_C_G_14295	0.336245	16.7238	0	FALSE
YDR116C	MRPL1	chrIV_682509_C_G_14295	-0.0918371	2.20653	0.261998	FALSE
YDR117C	TMA64	chrIV_682509_C_G_14295	-0.0772076	0.532311	0.884188	FALSE
YDR119W	VBA4	chrIV_682509_C_G_14295	-0.147003	1.22428	0.601025	FALSE
YDR119W-A	COX26	chrIV_697891_G_A_14436	0.245587	0.578924	0.868845	FALSE
YDR120C	TRM1	chrIV_697891_G_A_14436	-0.115296	0.399993	0.935758	FALSE
YDR121W	DPB4	chrIV_697891_G_A_14436	-0.413152	3.29006	0.0667448	FALSE
YDR122W	KIN1	chrIV_697891_G_A_14436	0.512536	7.0516	0.000787402	FALSE
YDR127W	ARO1	chrIV_709261_A_C_14487	0.122167	3.39635	0.0564384	FALSE
YDR128W	MTC5	chrIV_709261_A_C_14487	-0.0369099	0.143829	0.99226	FALSE
YDR129C	SAC6	chrIV_709261_A_C_14487	0.115208	1.56453	0.469727	FALSE
YDR130C	FIN1	chrIV_720845_C_T_14598	-0.368882	3.46395	0.0492331	FALSE
YDR132C	YDR132C	chrIV_720845_C_T_14598	-0.367854	1.46781	0.509973	FALSE
YDR133C	YDR133C	chrIV_720845_C_T_14598	-0.009206	2.71667	0.144817	FALSE
YDR137W	RGP1	chrIV_733614_G_C_14668	0.269823	2.0279	0.307178	FALSE
YDR138W	HPR1	chrIV_733614_G_C_14668	0.0141835	1.74946	0.402571	FALSE
YDR139C	RUB1	chrIV_733614_G_C_14668	0.0605756	1.72287	0.408929	FALSE
YDR140W	MTQ2	chrIV_734832_G_A_14672	-0.166265	1.35691	0.54564	FALSE
YDR141C	DOP1	chrIV_734832_G_A_14672	0.0713859	1.29311	0.575105	FALSE
YDR142C	PEX7	chrIV_734832_G_A_14672	0.232398	1.30183	0.570324	FALSE
YDR143C	SAN1	chrIV_748297_T_C_14732	-0.13458	0.790008	0.781094	FALSE
YDR144C	MKC7	chrIV_748297_T_C_14732	-0.31949	1.69408	0.418202	FALSE
YDR145W	TAF12	chrIV_748297_T_C_14732	-0.186276	2.10617	0.28639	FALSE
YDR147W	EKI1	chrIV_753137_T_A_14758	-0.362549	3.26501	0.0686548	FALSE
YDR148C	KGD2	chrIV_753137_T_A_14758	-0.0220511	0.315321	0.959456	FALSE
YDR150W	NUM1	chrIV_765506_T_C_14806	-0.0651411	0.758528	0.795748	FALSE
YDR151C	CTH1	chrIV_765506_T_C_14806	0.244885	1.16191	0.632221	FALSE
YDR152W	GIR2	chrIV_765506_T_C_14806	-0.0169141	1.71095	0.411316	FALSE
YDR153C	ENT5	chrIV_765506_T_C_14806	0.426779	7.0668	0.000787402	FALSE
YDR154C	YDR154C	chrIV_769896_T_C_14824	-0.201232	8.99412	0	FALSE
YDR155C	CPR1	chrIV_769896_T_C_14824	-0.134197	3.74255	0.0328173	FALSE
YDR156W	RPA14	chrIV_769896_T_C_14824	-0.046356	1.16484	0.631558	FALSE
YDR158W	HOM2	chrIV_771271_A_G_14836	-0.0192485	0.159061	0.991013	FALSE
YDR159W	SAC3	chrIV_771271_A_G_14836	0.168937	4.05154	0.0203998	FALSE
YDR160W	SSY1	chrIV_771271_A_G_14836	-0.0577672	2.85776	0.118841	FALSE
YDR161W	ACL4	chrIV_786128_T_C_14902	-0.110318	1.88975	0.34914	FALSE
YDR162C	NBP2	chrIV_786128_T_C_14902	-0.0852397	0.622891	0.851823	FALSE
YDR163W	CWC15	chrIV_786128_T_C_14902	0.0902505	1.02119	0.687056	FALSE
YDR164C	SEC1	chrIV_786128_T_C_14902	0.309562	1.32757	0.557409	FALSE
YDR165W	TRM82	chrIV_786128_T_C_14902	0.351347	4.04901	0.0204389	FALSE
YDR166C	SEC5	chrIV_786128_T_C_14902	0.00580238	0.24355	0.974328	FALSE
YDR167W	TAF10	chrIV_791869_C_T_14919	0.0577157	1.12183	0.644629	FALSE
YDR168W	CDC37	chrIV_791869_C_T_14919	0.0800124	0.883467	0.742072	FALSE
YDR169C	STB3	chrIV_791869_C_T_14919	-0.131686	0.504186	0.895236	FALSE
YDR171W	HSP42	chrIV_810702_C_T_15035	0.413654	4.08125	0.020245	FALSE
YDR172W	SUP35	chrIV_810702_C_T_15035	-0.0790499	1.69119	0.419544	FALSE
YDR173C	ARG82	chrIV_810702_C_T_15035	0.123539	0.553746	0.876707	FALSE
YDR175C	RSM24	chrIV_814094_T_C_15052	-0.10203	1.86247	0.362129	FALSE
YDR176W	NGG1	chrIV_814094_T_C_15052	0.234164	1.84076	0.36916	FALSE
YDR178W	SDH4	chrIV_817645_G_A_15069	0.133804	2.52512	0.181337	FALSE
YDR179C	CSN9	chrIV_817645_G_A_15069	0.0923228	0.573492	0.870931	FALSE
YDR179W-A	NVJ3	chrIV_817645_G_A_15069	0.0261729	1.50146	0.492499	FALSE
YDR180W	SCC2	chrIV_817645_G_A_15069	-0.0601624	0.364767	0.945449	FALSE
YDR181C	SAS4	chrIV_832597_A_G_15124	0.15665	0.846588	0.757621	FALSE
YDR182W	CDC1	chrIV_832597_A_G_15124	0.109329	0.787905	0.782139	FALSE
YDR183C-A	YDR183C-A	chrIV_832597_A_G_15124	-0.36578	1.32392	0.55889	FALSE
YDR183W	PLP1	chrIV_832597_A_G_15124	-0.174567	0.949628	0.71488	FALSE
YDR189W	SLY1	chrIV_840549_G_C_15155	-0.168842	2.26683	0.245328	FALSE
YDR190C	RVB1	chrIV_840549_G_C_15155	-0.0263365	0.67628	0.832195	FALSE
YDR191W	HST4	chrIV_841606_C_A_15158	0.410355	1.1662	0.631252	FALSE
YDR194C	MSS116	chrIV_841606_C_A_15158	-0.124993	1.17621	0.62703	FALSE
YDR195W	REF2	chrIV_841606_C_A_15158	-0.461801	1.90099	0.346226	FALSE
YDR196C	CAB5	chrIV_841606_C_A_15158	-0.0887411	0.508362	0.89339	FALSE
YDR197W	CBS2	chrIV_841606_C_A_15158	0.335335	1.26621	0.584553	FALSE
YDR198C	RKM2	chrIV_841606_C_A_15158	-0.113679	0.591306	0.863864	FALSE
YDR200C	VPS64	chrIV_841606_C_A_15158	0.268941	1.54645	0.475697	FALSE
YDR201W	SPC19	chrIV_871483_G_T_15356	-0.0146538	1.89967	0.346517	FALSE
YDR202C	RAV2	chrIV_871483_G_T_15356	0.0799232	1.79599	0.38702	FALSE
YDR204W	COQ4	chrIV_871483_G_T_15356	0.35636	3.50151	0.0466238	FALSE
YDR205W	MSC2	chrIV_871483_G_T_15356	-0.432304	2.76128	0.137532	FALSE
YDR206W	EBS1	chrIV_871483_G_T_15356	0.102411	1.33313	0.555388	FALSE
YDR207C	UME6	chrIV_871483_G_T_15356	-0.462871	4.47093	0.00892495	FALSE
YDR208W	MSS4	chrIV_871483_G_T_15356	0.0163171	2.34107	0.227165	FALSE
YDR210W	YDR210W	chrIV_871483_G_T_15356	-0.113744	2.39884	0.214023	FALSE
YDR211W	GCD6	chrIV_888734_C_T_15402	-0.0888907	0.682771	0.829209	FALSE
YDR212W	TCP1	chrIV_888734_C_T_15402	0.193587	4.02429	0.0213537	FALSE
YDR214W	AHA1	chrIV_888734_C_T_15402	0.393865	10.8199	0	FALSE
YDR217C	RAD9	chrIV_888734_C_T_15402	-0.0622271	0.514761	0.891267	FALSE
YDR218C	SPR28	chrIV_888734_C_T_15402	0.830386	6.17743	0.00120482	FALSE
YDR219C	MFB1	chrIV_921826_A_G_15554	0.233607	1.48083	0.505391	FALSE
YDR221W	GTB1	chrIV_921826_A_G_15554	-0.0111739	0.727825	0.810413	FALSE
YDR222W	YDR222W	chrIV_921826_A_G_15554	0.110526	0.403448	0.935011	FALSE
YDR224C	HTB1	chrIV_921826_A_G_15554	0.12563	1.98593	0.317788	FALSE
YDR225W	HTA1	chrIV_921826_A_G_15554	-0.00778014	1.99707	0.314656	FALSE
YDR226W	ADK1	chrIV_921826_A_G_15554	-0.0243537	0.214729	0.980095	FALSE
YDR227W	SIR4	chrIV_921826_A_G_15554	0.34821	3.15405	0.0810017	FALSE
YDR228C	PCF11	chrIV_921826_A_G_15554	0.237616	2.51401	0.18436	FALSE
YDR229W	IVY1	chrIV_921826_A_G_15554	-0.0101126	0.292609	0.963628	FALSE
YDR231C	COX20	chrIV_921826_A_G_15554	0.235185	2.22001	0.256752	FALSE
YDR232W	HEM1	chrIV_921826_A_G_15554	0.385887	6.89922	0.000787402	FALSE
YDR233C	RTN1	chrIV_935192_T_G_15641	-0.0217686	1.7464	0.403505	FALSE
YDR234W	LYS4	chrIV_935192_T_G_15641	-0.158702	1.99614	0.314906	FALSE
YDR235W	PRP42	chrIV_935192_T_G_15641	0.161987	1.319	0.561059	FALSE
YDR236C	FMN1	chrIV_935192_T_G_15641	-0.278615	4.2436	0.0162264	FALSE
YDR237W	MRPL7	chrIV_937878_C_A_15652	-0.0832823	0.78133	0.785403	FALSE
YDR238C	SEC26	chrIV_937878_C_A_15652	0.00702894	0.937979	0.720225	FALSE
YDR239C	YDR239C	chrIV_945656_T_A_15680	-0.140563	1.23124	0.598492	FALSE
YDR240C	SNU56	chrIV_945656_T_A_15680	-0.280063	2.07257	0.294506	FALSE
YDR245W	MNN10	chrIV_954022_C_T_15733	0.0869979	2.42147	0.208506	FALSE
YDR246W	TRS23	chrIV_954022_C_T_15733	0.0494879	1.46325	0.51108	FALSE
YDR247W	VHS1	chrIV_957741_T_A_15757	0.158433	0.956632	0.711167	FALSE
YDR248C	YDR248C	chrIV_957741_T_A_15757	-0.000716547	0.888556	0.739473	FALSE
YDR249C	YDR249C	chrIV_957741_T_A_15757	0.101088	1.65512	0.431487	FALSE
YDR251W	PAM1	chrIV_962980_T_C_15779	-0.235245	1.88974	0.349147	FALSE
YDR253C	MET32	chrIV_962980_T_C_15779	-0.0547867	0.159603	0.990993	FALSE
YDR254W	CHL4	chrIV_962980_T_C_15779	0.641828	3.86447	0.0252836	FALSE
YDR256C	CTA1	chrIV_971728_C_T_15822	-0.507999	4.20886	0.0172204	FALSE
YDR257C	RKM4	chrIV_971728_C_T_15822	-0.424631	3.06274	0.0944872	FALSE
YDR258C	HSP78	chrIV_971728_C_T_15822	0.0302298	3.39816	0.0564384	FALSE
YDR259C	YAP6	chrIV_971728_C_T_15822	-0.341655	3.05026	0.0966436	FALSE
YDR260C	SWM1	chrIV_971728_C_T_15822	0.729926	4.92749	0.00379147	FALSE
YDR262W	YDR262W	chrIV_1002178_A_G_16013	0.367011	2.26458	0.24581	FALSE
YDR264C	AKR1	chrIV_1002178_A_G_16013	0.21494	2.36299	0.223602	FALSE
YDR265W	PEX10	chrIV_1002178_A_G_16013	-0.143001	0.943805	0.717556	FALSE
YDR266C	HEL2	chrIV_1002178_A_G_16013	0.227231	2.45513	0.200319	FALSE
YDR267C	CIA1	chrIV_1002178_A_G_16013	-0.182098	2.12447	0.281483	FALSE
YDR268W	MSW1	chrIV_1002178_A_G_16013	0.0155376	0.570013	0.872268	FALSE
YDR270W	CCC2	chrIV_1008697_G_A_16051	0.171553	3.05517	0.0957577	FALSE
YDR272W	GLO2	chrIV_1008697_G_A_16051	-0.0376364	0.495601	0.899043	FALSE
YDR275W	BSC2	chrIV_1013236_A_T_16082	0.016832	0.668023	0.836624	FALSE
YDR276C	PMP3	chrIV_1013236_A_T_16082	-0.0448018	3.02281	0.0997521	FALSE
YDR277C	MTH1	chrIV_1013236_A_T_16082	0.402798	2.26106	0.246559	FALSE
[truncated: 3,264 more rows]
