# Supplementary material for: Single-cell eQTL mapping in yeast reveals a tradeoff between growth and reproduction
Source: eLife. 2025 Mar 12;13:RP95566. doi: 10.7554/eLife.95566 (PMC11903034; doi:10.7554/eLife.95566)
Supplement: Supplementary file 5. — Each sheet has the ASE summary statistics for the parental hybrids of the three crosses we examined (Table S1 cross A=BY and RM, Table S2 cross B=YJM145 and Table S3 YPS163, cross C=CBS2888xYJM981). The local eQTL summary statistics were included from the corresponding one-pot eQTL experiment for each transcript that was tested there. Missing values in the one-pot eQTL columns indicate that a gene did not pass our filtering criteria, and a local eQTL test was not performed. [file elife-95566-supp5.xlsx]

## Sheet: S1 (Cross A)
Supplemenary File 5: Single-cell allele-specific expression (ASE) summary statistics. Each sheet has the ASE summary statistics for the parental hybrids of the three crosses we examined (Table S1 cross A=BY and RM, Table S2 cross B=YJM145 and Table S3 YPS163, cross C=CBS2888xYJM981). The local eQTL summary statistics were included from the corresponding one-pot eQTL experiment for each transcript…
transcript	gene name	estimate (ASE)	p-value (ASE)	adjust p-value (ASE)	has cell-cycle interaction (ASE)	estimate (one-pot)	LOD (one-pot)	FDR (one-pot)
YAL001C	TFC3	-0.0314058	0.820014	0.910912	FALSE	0.0818721	1.08884	0.616885
YAL003W	EFB1	0.043027	0.00126966	0.0074441	FALSE	0.0558189	24.6036	0
YAL005C	SSA1	-0.487122	6.40267e-12	1.10329e-10	FALSE	-0.221345	47.4004	0
YAL007C	ERP2	0.273293	0.223062	0.425353	FALSE	0.0154334	2.17252	0.203614
YAL008W	FUN14	-0.18189	0.0867555	0.228538	FALSE	0.0849669	4.06849	0.00970695
YAL009W	SPO7	-0.0625852	0.599002	0.771588	FALSE	-0.0273957	1.5401	0.419061
YAL011W	SWC3	0.0941246	0.502252	0.697381	FALSE	-0.00479179	0.350691	0.941275
YAL013W	DEP1	-0.077165	0.502145	0.697381	FALSE
YAL014C	SYN8	0.000413273	0.996289	1	FALSE	0.00994501	0.657104	0.817538
YAL028W	FRT2	-0.302121	0.0930893	0.240247	FALSE	-0.0633798	1.6159	0.385541
YAL031C	GIP4	-0.0618751	0.760706	0.874118	FALSE	0.0720512	1.17258	0.579505
YAL032C	PRP45	-0.203985	0.0493392	0.151722	FALSE	0.222088	8.50602	0
YAL035W	FUN12	0.0298387	0.718288	0.848615	FALSE	-0.0228334	1.26399	0.540144
YAL039C	CYC3	-0.14003	0.0266725	0.095899	FALSE
YAL040C	CLN3	0.0338377	0.623057	0.78812	FALSE
YAL041W	CDC24	-0.112423	0.252509	0.46018	FALSE
YAL042W	ERV46	-0.0871635	0.247082	0.457434	FALSE
YAL043C	PTA1	0.361927	0.0101041	0.0441331	FALSE
YAL044C	GCV3	0.0559266	0.00552354	0.026323	FALSE	-0.019825	2.77729	0.091128
YAL044W-A	BOL1	0.00457646	0.961848	0.987353	FALSE	-0.0192249	1.79799	0.315332
YAL045C	YAL045C	0.00457646	0.961848	0.987353	FALSE
YAL046C	BOL3	0.327458	8.01865e-14	1.60714e-12	FALSE
YAL047C	SPC72	0.706942	0.00685098	0.0318435	FALSE	0.112415	2.04057	0.234076
YAL049C	AIM2	1.04566	2.24367e-16	5.51357e-15	FALSE	0.522163	153.326	0
YAL053W	FLC2	-0.110638	0.245468	0.456677	FALSE	-0.0371701	1.3345	0.510179
YAL054C	ACS1	0.46723	7.95956e-07	8.39318e-06	FALSE	-0.0684103	1.66003	0.369561
YAL055W	PEX22	-0.123371	0.263587	0.46967	FALSE	-0.134918	4.25936	0.00741266
YAL056C-A	YAL056C-A	0.409538	0.00191778	0.010732	FALSE
YAL056W	GPB2	-0.12677	0.277656	0.484571	FALSE
YAL058W	CNE1	0.340453	0.00806977	0.0366643	FALSE
YAL059W	ECM1	0.281481	9.83473e-05	0.000757301	FALSE
YAL060W	BDH1	0.566236	1.18568e-39	7.97791e-38	FALSE
YAL061W	BDH2	-0.0294742	0.806826	0.905505	FALSE
YAL062W	GDH3	-0.411956	0.00285249	0.0150675	FALSE
YAL063C	FLO9	-3.58804	3.09411e-11	5.11343e-10	FALSE
YAR002C-A	ERP1	-0.0556857	0.195735	0.391748	FALSE	0.00491796	0.918481	0.694758
YAR003W	SWD1	-3.52708	3.97233e-34	2.33871e-32	FALSE	-0.0710825	1.01912	0.648814
YAR018C	KIN3	-18.8611	0.98193	0.996394	FALSE	0.0107493	0.777256	0.765873
YAR019C	CDC15	-6.25767	4.06344e-10	6.17381e-09	FALSE	0.0161345	1.6859	0.358748
YAR023C	YAR023C	-25.3413	0.999267	1	FALSE	0.045627	1.87673	0.287958
YAR027W	UIP3	-8.20813	9.42595e-46	7.39937e-44	FALSE	-0.0104598	0.716635	0.791833
YAR033W	MST28	-3.09104	1.15334e-27	5.82023e-26	FALSE	-0.0553109	0.777548	0.76574
YAR035W	YAT1	-19.8578	0.955469	0.983663	FALSE	0.0226943	0.451037	0.906443
YAR042W	SWH1	-12.8731	0.747697	0.867119	FALSE	0.042161	0.660115	0.815929
YBL002W	HTB2	0.0752234	0.664687	0.811593	FALSE	0.00427876	2.04436	0.233871
YBL003C	HTA2	0.175243	0.000788509	0.00490903	FALSE	0.00452343	1.02255	0.647453
YBL004W	UTP20	-0.197854	0.173939	0.364112	FALSE	-0.0538403	1.14634	0.590223
YBL005W	PDR3	-1.42403	4.03682e-06	3.89353e-05	FALSE
YBL006C	LDB7	0.0529883	0.217078	0.418589	FALSE
YBL007C	SLA1	0.102005	0.160782	0.34422	FALSE	-0.076708	3.50371	0.0272537
YBL009W	ALK2	0.0686257	0.664556	0.811593	FALSE	0.00319843	1.10214	0.610806
YBL010C	YBL010C	-0.0729942	0.659601	0.811593	FALSE	0.102701	1.40339	0.479926
YBL011W	SCT1	-0.0732298	0.417905	0.620599	FALSE	-0.0223768	0.390057	0.928341
YBL014C	RRN6	0.127924	0.363049	0.568723	FALSE	0.0146449	2.65226	0.106946
YBL015W	ACH1	-0.694724	1.65407e-10	2.5969e-09	FALSE	-0.213224	3.03366	0.0638379
YBL017C	PEP1	-0.203042	0.0238857	0.0878919	FALSE	-0.00252627	0.735768	0.781768
YBL018C	POP8	-0.289718	8.86123e-09	1.15934e-07	FALSE	-0.314808	34.4	0
YBL019W	APN2	-0.417763	1.55099e-10	2.46242e-09	FALSE
YBL020W	RFT1	0.0109994	0.94024	0.97505	FALSE
YBL021C	HAP3	-0.0581129	0.560826	0.744781	FALSE
YBL023C	MCM2	-0.116205	0.336358	0.54286	FALSE
YBL024W	NCL1	0.0493004	0.62034	0.785793	FALSE
YBL026W	LSM2	0.10297	0.501086	0.697187	FALSE
YBL027W	RPL19B	-0.283973	6.1089e-05	0.000487677	FALSE
YBL028C	YBL028C	-0.02227	0.698045	0.834852	FALSE
YBL029C-A	YBL029C-A	-0.000802521	0.99076	0.999723	FALSE
YBL029W	YBL029W	-0.243153	0.000223584	0.00158358	FALSE
YBL030C	PET9	-0.117818	0.000162903	0.00119265	FALSE	0.0915172	12.1357	0
YBL031W	SHE1	-0.138191	0.00254153	0.0136288	FALSE	0.168457	3.77001	0.0181814
YBL032W	HEK2	-0.0831854	0.152876	0.333577	FALSE
YBL033C	RIB1	0.197667	0.152859	0.333577	FALSE
YBL034C	STU1	-0.175101	0.198853	0.396023	FALSE
YBL035C	POL12	0.08758	0.632981	0.794318	FALSE
YBL036C	YBL036C	0.0108272	0.854075	0.932188	FALSE	-0.186369	17.2703	0
YBL037W	APL3	0.00881734	0.897369	0.957387	FALSE	-0.298209	8.72919	0
YBL038W	MRPL16	0.182465	0.00463353	0.0229323	FALSE
YBL039C	URA7	0.0358134	0.619312	0.785537	FALSE
YBL039C-A	YBL039C-A	0.0489345	0.756585	0.871985	FALSE
YBL039W-B	YBL039W-B	0.0277484	0.680359	0.822719	FALSE
YBL040C	ERD2	-0.0476483	0.0536511	0.160783	FALSE	-0.0414425	2.36767	0.160406
YBL041W	PRE7	0.0838303	0.0935694	0.240678	FALSE	0.0994707	14.9428	0
YBL042C	FUI1	-0.0824367	0.3457	0.552573	FALSE	0.00701371	0.947989	0.6809
YBL045C	COR1	0.0582426	0.113628	0.275936	FALSE	0.0874286	2.91825	0.075775
YBL046W	PSY4	0.552921	0.00013025	0.000978955	FALSE	0.607482	26.9866	0
YBL047C	EDE1	0.143716	0.0222935	0.0832252	FALSE	-0.0688172	1.40397	0.479704
YBL050W	SEC17	-0.118092	0.103492	0.258592	FALSE	-0.0449405	2.74633	0.0939149
YBL052C	SAS3	-0.10059	0.569098	0.750827	FALSE	0.0565003	1.18299	0.576642
YBL053W	YBL053W	-0.221962	0.314851	0.521244	FALSE
YBL054W	TOD6	0.266358	0.183219	0.378214	FALSE	0.0675197	1.32453	0.513669
YBL055C	YBL055C	0.119434	0.586984	0.761973	FALSE	0.160541	2.29414	0.174647
YBL056W	PTC3	-0.178396	0.00830763	0.0374284	FALSE	-0.122731	11.2909	0
YBL067C	UBP13	-0.189242	0.332127	0.539731	FALSE	0.0552519	0.801957	0.753186
YBL082C	ALG3	0.0218076	0.840229	0.923925	FALSE
YBL083C	YBL083C	0.0218076	0.840229	0.923925	FALSE
YBL099W	ATP1	-0.00751701	0.86067	0.935123	FALSE	0.0861741	7.26363	0.000403226
YBL107C	MIX23	-0.0826703	0.332414	0.539887	FALSE	-0.161169	8.12674	0
YBR001C	NTH2	-0.452683	0.000257758	0.00180447	FALSE	-0.126429	3.62528	0.0231658
YBR003W	COQ1	0.0725431	0.536242	0.723351	FALSE	-0.052	0.655407	0.818451
YBR005W	RCR1	0.0659728	0.411029	0.613937	FALSE
YBR006W	UGA2	0.171928	0.124919	0.294185	FALSE
YBR007C	DSF2	-0.223144	0.249194	0.458777	FALSE
YBR008C	FLR1	-0.0425982	0.771464	0.880858	FALSE
YBR009C	HHF1	-0.0491454	0.0483556	0.149839	FALSE
YBR010W	HHT1	-0.0281694	0.905538	0.960211	FALSE
YBR011C	IPP1	-0.1256	0.361582	0.567368	FALSE
YBR012C	YBR012C	1.4409	3.14981e-16	7.60799e-15	FALSE
YBR014C	GRX7	-0.0778612	0.164916	0.349889	FALSE	0.0315111	2.11315	0.217246
YBR015C	MNN2	-0.0870114	0.581289	0.759465	FALSE	0.0200026	1.18665	0.576128
YBR021W	FUR4	0.0357181	0.850115	0.928994	FALSE	-0.124491	2.22916	0.189295
YBR025C	OLA1	-0.19334	9.45143e-07	9.81976e-06	FALSE	-0.0435087	3.09991	0.0562299
YBR026C	ETR1	-0.460456	2.42019e-06	2.39981e-05	FALSE	-0.563273	88.7913	0
YBR030W	RKM3	-0.159951	0.206235	0.403056	FALSE	-0.154704	5.38262	0.000653595
YBR031W	RPL4A	-4.58571	6.08191e-274	1.5625e-271	FALSE	0.0743232	32.9279	0
YBR041W	FAT1	0.0861291	0.392497	0.596943	FALSE	0.0740794	1.92185	0.27334
YBR042C	CST26	-0.0469932	0.528693	0.717621	FALSE	0.0112895	1.34449	0.505805
YBR043C	QDR3	-0.152511	0.173123	0.362755	FALSE	0.000916177	0.224205	0.978396
YBR044C	TCM62	0.118855	0.414717	0.617812	FALSE	0.116123	1.99182	0.248138
YBR045C	GIP1	0.76214	0.000868368	0.00534642	FALSE	1.3717	52.8538	0
YBR046C	ZTA1	0.414574	0.000141493	0.00105504	FALSE
YBR049C	REB1	0.0132836	0.926038	0.968895	FALSE	0.00217771	0.128548	0.993989
YBR056W	YBR056W	0.0503648	0.783477	0.888842	FALSE	-0.0733872	2.47923	0.138821
YBR057C	MUM2	-0.030798	0.814046	0.90914	FALSE
YBR060C	ORC2	0.0738781	0.703808	0.83781	FALSE	0.117953	2.1514	0.207041
YBR061C	TRM7	0.0534351	0.571188	0.75183	FALSE	0.0142921	1.47213	0.448099
YBR062C	YBR062C	0.172364	0.0218615	0.0820459	FALSE
YBR063C	YBR063C	-0.390308	0.0390666	0.128375	FALSE	0.0433446	1.68238	0.360564
YBR066C	NRG2	-1.52606	4.66119e-12	8.23283e-11	FALSE	-0.386493	94.5279	0
YBR068C	BAP2	-1.81708	1.22886e-09	1.81821e-08	FALSE
YBR070C	ALG14	0.198984	0.021753	0.0818563	FALSE
YBR071W	YBR071W	0.328579	0.0242133	0.0887638	FALSE
YBR072W	HSP26	-0.148166	0.305658	0.51233	FALSE
YBR074W	PFF1	0.152259	0.141904	0.317676	FALSE
YBR076C-A	YBR076C-A	0.0814282	0.473578	0.674562	FALSE
YBR076W	ECM8	-0.0641265	0.642713	0.799048	FALSE
YBR077C	SLM4	-0.00391776	0.966926	0.988973	FALSE
YBR078W	ECM33	-0.100338	4.16081e-05	0.000346857	TRUE
YBR079C	RPG1	-0.106268	0.176842	0.368008	FALSE
YBR081C	SPT7	-0.0977646	0.616176	0.783669	FALSE	-0.101813	6.55483	0.000403226
YBR082C	UBC4	-0.261994	2.70167e-08	3.29091e-07	FALSE	0.0436108	3.35625	0.0369385
YBR083W	TEC1	-0.04652	0.829264	0.916628	FALSE	0.503756	38.8094	0
YBR084C-A	RPL19A	1.31228	4.19451e-10	6.33887e-09	FALSE	0.00537674	0.652691	0.819913
YBR084W	MIS1	0.120647	0.474991	0.674602	FALSE	0.0560606	1.32372	0.513975
YBR085C-A	YBR085C-A	-0.655018	1.26218e-120	2.22932e-118	FALSE	-0.0327938	3.47873	0.0296434
YBR086C	IST2	-0.425152	2.31677e-07	2.58783e-06	FALSE	-0.0345701	1.49154	0.437854
YBR087W	RFC5	-0.304412	0.00102618	0.00618331	FALSE	0.0272997	2.43188	0.14708
YBR088C	POL30	-0.237672	0.255135	0.463375	FALSE	-0.0283082	1.2185	0.562815
YBR091C	TIM12	-0.182322	0.223689	0.425974	FALSE	-0.129137	5.52245	0.000653595
YBR092C	PHO3	-0.0899832	0.487285	0.685108	FALSE	-0.864518	30.7514	0
YBR093C	PHO5	1.63371	3.08874e-15	7.09657e-14	FALSE	0.225258	5.53822	0.000653595
YBR103C-A	YBR103C-A	0.28859	0.0276626	0.0987052	FALSE
YBR103W	SIF2	0.278967	0.00873268	0.0391102	FALSE	0.24585	17.678	0
YBR105C	VID24	-0.1613	0.365927	0.572256	FALSE	-0.181613	12.6863	0
YBR106W	PHO88	0.0108229	0.509314	0.704169	FALSE
YBR107C	IML3	0.284556	0.0503072	0.153034	FALSE	1.35737	24.5401	0
YBR108W	AIM3	-0.00297339	0.982351	0.996394	FALSE	0.0074319	0.850295	0.731915
YBR109C	CMD1	0.08004	0.00657801	0.0306251	FALSE	-0.0398195	7.65569	0
YBR110W	ALG1	-0.0961323	0.273156	0.479763	FALSE	0.0017201	2.53086	0.12872
YBR111C	YSA1	-0.0662603	0.085952	0.228001	FALSE
YBR111W-A	SUS1	0.066324	0.270868	0.476929	FALSE
YBR112C	CYC8	-0.103594	0.368362	0.574815	FALSE
YBR114W	RAD16	-0.0376952	0.732717	0.859194	FALSE
YBR115C	LYS2	0.0362154	0.645321	0.801265	FALSE
YBR119W	MUD1	0.0354592	0.765487	0.876171	FALSE	0.0719826	1.99467	0.247224
YBR121C	GRS1	-0.0789262	0.0614001	0.177966	FALSE
YBR122C	MRPL36	-0.0649878	0.128528	0.298946	FALSE
YBR126C	TPS1	0.178911	1.81719e-05	0.000160984	FALSE
YBR127C	VMA2	0.0677909	0.0546812	0.163098	FALSE	0.0156276	0.464249	0.901522
YBR130C	SHE3	-0.116216	0.301984	0.508455	FALSE	0.045366	2.15586	0.206835
YBR131W	CCZ1	-0.00409722	0.986132	0.997542	FALSE	0.0141656	2.5687	0.12171
YBR133C	HSL7	0.00512973	0.974114	0.992907	FALSE	-0.0601928	2.06403	0.229891
YBR135W	CKS1	-0.158681	0.101281	0.255553	FALSE
YBR137W	YBR137W	0.0695422	0.221513	0.424116	FALSE
YBR138C	YBR138C	0.209827	0.164226	0.348949	FALSE
YBR139W	YBR139W	0.0339245	0.513426	0.706742	FALSE
YBR140C	IRA1	0.0544344	0.354165	0.55977	FALSE
YBR141C	BMT2	-0.174389	0.247582	0.457557	FALSE
YBR142W	MAK5	-0.053116	0.584148	0.761089	FALSE	0.132305	3.84169	0.0154851
YBR143C	SUP45	-0.116176	0.379591	0.587475	FALSE	-0.043727	2.88137	0.0788278
YBR145W	ADH5	0.440862	0.00168017	0.00951535	FALSE
YBR146W	MRPS9	0.131695	0.11783	0.282913	FALSE
YBR147W	RTC2	-0.154723	0.0862599	0.22825	FALSE
YBR148W	YSW1	0.63908	0.0014363	0.00831758	FALSE
YBR149W	ARA1	-0.324883	5.43793e-12	9.54509e-11	FALSE
YBR150C	TBS1	-0.5127	8.67342e-18	2.33439e-16	FALSE
YBR151W	APD1	-0.0215079	0.705181	0.838032	FALSE
YBR153W	RIB7	0.104756	0.307131	0.51313	FALSE
YBR154C	RPB5	0.0437528	0.38068	0.587928	FALSE
YBR155W	CNS1	-0.109722	0.327419	0.535157	FALSE
YBR156C	SLI15	0.102776	0.583745	0.761089	FALSE	-0.0931726	3.93779	0.012059
YBR159W	IFA38	0.101306	0.0430002	0.136845	FALSE	-0.360443	43.4383	0
YBR160W	CDC28	0.0979804	0.40795	0.610952	FALSE
YBR161W	CSH1	0.0393552	0.671306	0.817015	FALSE
YBR162C	TOS1	0.248799	4.05118e-15	9.08622e-14	FALSE
YBR162W-A	YSY6	0.177038	6.45323e-10	9.64912e-09	FALSE
YBR163W	EXO5	-0.20485	0.19232	0.389045	FALSE
YBR165W	UBS1	0.218254	0.298105	0.504458	FALSE	0.0667101	1.12022	0.602025
YBR166C	TYR1	-0.685227	3.24272e-08	3.91621e-07	FALSE	-0.132997	2.86694	0.0804915
YBR167C	POP7	-0.0820867	0.514483	0.707508	FALSE
YBR168W	PEX32	-0.113752	0.25978	0.467973	FALSE
YBR169C	SSE2	0.268552	0.00357425	0.0182986	FALSE
YBR170C	NPL4	0.0350761	0.793686	0.897542	FALSE	0.125533	5.63442	0.000403226
YBR171W	SEC66	0.105941	0.0439424	0.138595	FALSE	0.0529313	3.4488	0.0307856
YBR172C	SMY2	0.0403402	0.517935	0.710181	FALSE	0.0337358	1.09949	0.611933
YBR173C	UMP1	0.29661	9.97798e-20	2.96819e-18	FALSE
YBR175W	SWD3	-0.0584864	0.579778	0.758446	FALSE
YBR176W	ECM31	-0.123861	0.0277397	0.0988554	FALSE	0.0544543	2.20795	0.193693
YBR177C	EHT1	-0.068468	0.193636	0.390015	FALSE	-0.221973	34.9167	0
YBR178W	YBR178W	0.308082	0.18937	0.385115	FALSE
YBR179C	FZO1	0.385663	0.0827459	0.221439	FALSE	0.170541	4.65566	0.0039886
YBR181C	RPS6B	0.00306325	0.809032	0.906797	FALSE	0.0508987	24.5253	0
YBR182C	SMP1	0.380464	0.031181	0.10812	FALSE
YBR183W	YPC1	-0.409343	0.000212106	0.00151367	FALSE	-0.478256	20.5515	0
YBR185C	MBA1	-0.085201	0.334045	0.540808	FALSE	0.0308459	0.810722	0.750065
YBR187W	GDT1	-0.154674	0.0291247	0.102117	FALSE	0.0157678	0.386844	0.929442
YBR188C	NTC20	-0.125156	0.0627861	0.181239	FALSE	0.068015	1.19329	0.574399
YBR189W	RPS9B	-0.0190735	0.899819	0.958496	FALSE	0.00771222	1.0529	0.635199
YBR191W	RPL21A	-0.0179257	0.0596516	0.17361	FALSE	0.0184649	4.41311	0.00580258
YBR191W-A	YBR191W-A	-0.290459	1.74432e-05	0.000155471	FALSE	-0.146411	4.11338	0.00842912
YBR193C	MED8	-0.243967	0.112274	0.273983	FALSE
YBR194W	AIM4	-0.0568446	0.571998	0.752545	FALSE
YBR195C	MSI1	-0.15219	0.290407	0.4989	FALSE
YBR196C	PGI1	-0.172629	8.07252e-07	8.48064e-06	FALSE	-0.0372859	5.09484	0.00150376
YBR197C	YBR197C	-2.03122	6.46504e-16	1.54832e-14	FALSE	-1.54596	157.067	0
YBR198C	TAF5	0.0281447	0.835184	0.920886	FALSE
YBR199W	KTR4	0.0749515	0.161397	0.345276	FALSE	0.0590799	5.64386	0.000403226
YBR200W	BEM1	-0.301105	0.0495737	0.152199	FALSE	-0.0775945	1.95727	0.25903
YBR201C-A	YBR201C-A	-0.099504	0.524424	0.713791	FALSE	0.223019	1.33744	0.509252
YBR201W	DER1	-0.186799	0.0399042	0.12962	FALSE	-0.0984625	3.46607	0.0302059
YBR202W	MCM7	0.21055	0.063451	0.182414	FALSE
YBR203W	COS111	0.214758	0.112254	0.273983	FALSE
YBR204C	LDH1	-0.348913	0.00264382	0.014097	FALSE	-0.147088	4.6785	0.0039886
YBR205W	KTR3	-0.160382	0.236694	0.444155	FALSE	-0.40435	9.25731	0
YBR207W	FTH1	0.059461	0.404747	0.608089	FALSE	-0.0985421	12.7552	0
YBR208C	DUR1,2	-0.0755184	0.553392	0.737677	FALSE	0.0171941	1.1693	0.580662
YBR210W	ERV15	0.489853	3.10221e-05	0.000264062	FALSE	0.782681	73.4478	0
YBR211C	AME1	0.395343	0.00121213	0.00713639	FALSE	1.3942	76.0977	0
YBR212W	NGR1	-0.0112319	0.914279	0.963025	FALSE	0.0145929	0.590476	0.848063
YBR213W	MET8	0.191544	0.149761	0.32923	FALSE	0.0465287	3.68924	0.0199955
YBR214W	SDS24	-0.141448	0.114266	0.276944	FALSE	-0.071302	3.05411	0.0616586
YBR216C	YBP1	-0.358335	0.00323539	0.0167765	FALSE	-0.0695332	0.872579	0.719134
YBR218C	PYC2	0.413799	1.08748e-05	9.81858e-05	FALSE	0.0918947	3.07281	0.0590048
YBR221W-A	YBR221W-A	-0.0793281	0.459618	0.660672	FALSE
YBR222C	PCS60	-0.0422729	0.64841	0.802982	FALSE	0.133221	4.60275	0.0039886
YBR223C	TDP1	-0.0597112	0.729751	0.857495	FALSE	0.120142	1.98581	0.249535
YBR225W	YBR225W	0.179204	0.322161	0.529011	FALSE	-0.39324	3.77866	0.0178681
YBR226C	YBR226C	0.253687	0.182774	0.377849	FALSE
YBR227C	MCX1	-0.247369	0.15788	0.340069	FALSE	-0.0655112	1.8647	0.292779
YBR228W	SLX1	-0.0458471	0.612348	0.781262	FALSE	-0.0913518	2.27447	0.179835
YBR229C	ROT2	-0.0130311	0.897985	0.957625	FALSE
YBR230C	OM14	-0.0788657	0.0462104	0.144801	FALSE
YBR230W-A	YBR230W-A	0.033635	0.416674	0.619096	FALSE
YBR231C	SWC5	-0.346707	0.00335168	0.0172529	FALSE
YBR233W	PBP2	0.209695	0.152978	0.333577	FALSE
YBR233W-A	DAD3	0.150294	0.000161911	0.00118847	FALSE	0.00739845	0.327613	0.947188
YBR234C	ARC40	0.0501088	0.310229	0.516621	FALSE	-0.00364898	0.58275	0.850525
YBR235W	VHC1	-0.121505	0.189769	0.385541	FALSE	-0.306615	9.91832	0
YBR236C	ABD1	0.160906	0.108757	0.268191	FALSE	0.0675151	2.24067	0.186696
YBR237W	PRP5	0.368879	0.0304323	0.105783	FALSE	0.0204621	1.91309	0.275497
YBR242W	YBR242W	-0.0195845	0.888708	0.950241	FALSE	0.00464048	0.142314	0.992406
YBR244W	GPX2	0.0117382	0.85935	0.934692	FALSE	-0.0217717	0.211449	0.981131
YBR247C	ENP1	-0.0137934	0.933817	0.97139	FALSE	-0.0335692	0.994082	0.66117
YBR249C	ARO4	-0.29013	4.13961e-11	6.80148e-10	FALSE	-0.117812	17.1009	0
YBR261C	TAE1	-0.0402668	0.705002	0.838032	FALSE	0.0352183	2.21819	0.191337
YBR263W	SHM1	-0.111928	0.392261	0.596943	FALSE	0.0112326	1.03852	0.640872
YBR267W	REI1	-0.0563601	0.731976	0.858681	FALSE
YBR268W	MRPL37	0.367182	4.78538e-13	9.07617e-12	FALSE
YBR271W	EFM2	-0.452317	0.0343335	0.115508	FALSE	-0.196759	6.46316	0.000403226
YBR272C	HSM3	-0.010244	0.947534	0.979419	FALSE	0.0784642	2.18384	0.200321
YBR273C	UBX7	-0.167076	0.110511	0.271161	FALSE	-0.163369	6.83913	0.000403226
YBR274W	CHK1	-0.0341713	0.779686	0.885608	FALSE	-0.102532	1.49691	0.435875
YBR275C	RIF1	-0.0281709	0.866716	0.937367	FALSE	0.337222	9.84449	0
YBR279W	PAF1	-0.209721	0.393315	0.596943	FALSE
YBR282W	MRPL27	-0.371564	0.0706288	0.197035	FALSE	-0.030274	1.45076	0.457822
YBR283C	SSH1	0.0749974	0.0949469	0.243264	FALSE	0.066149	4.50288	0.00475524
YBR288C	APM3	-0.145765	0.499672	0.696632	FALSE	-0.065898	2.30862	0.171671
YBR294W	SUL1	-0.0835394	0.469938	0.671068	FALSE	-0.0277709	1.91486	0.275087
YBR298C	MAL31	-0.522423	0.0012361	0.00726243	FALSE	-0.0465601	0.310358	0.952724
YCL010C	SGF29	0.00511181	0.981287	0.996394	FALSE	-0.19849	7.33086	0.000403226
YCL012C	YCL012C	-0.0533986	0.666812	0.813298	FALSE	0.0642339	0.995449	0.660809
YCL014W	BUD3	0.472254	0.00157533	0.00901192	FALSE
YCL016C	DCC1	-0.189401	0.266323	0.472461	FALSE
YCL017C	NFS1	0.262616	0.00996149	0.0436452	FALSE
YCL018W	LEU2	-0.0603006	0.199106	0.396249	FALSE
YCL025C	AGP1	0.0554382	0.535748	0.723281	FALSE
YCL026C-B	HBN1	1.65912	8.85769e-185	2.08599e-182	FALSE	0.581839	239.646	0
YCL030C	HIS4	-0.0368984	0.842325	0.924431	FALSE
YCL032W	STE50	-0.236682	0.195374	0.391629	FALSE	-0.0382629	0.344822	0.942471
YCL037C	SRO9	-0.229574	0.34004	0.546617	FALSE	0.146791	3.29927	0.0421892
YCL039W	GID7	-0.221727	0.203933	0.401466	FALSE	-0.106939	2.01079	0.243924
YCL043C	PDI1	-0.063273	0.0631274	0.181853	FALSE	-0.0077347	0.385668	0.929849
YCL047C	POF1	-0.0726367	0.506578	0.70176	FALSE
YCL052C	PBN1	-0.208525	0.115145	0.278356	FALSE	0.032282	0.722045	0.788926
YCR004C	YCP4	-0.131277	0.000526537	0.00343647	FALSE	-0.0597535	3.63066	0.023061
YCR007C	YCR007C	-0.0465188	0.829268	0.916628	FALSE	-0.243701	1.739	0.339156
YCR008W	SAT4	0.0717785	0.56328	0.746988	FALSE	0.0479068	0.0798944	0.997864
YCR009C	RVS161	-0.0984401	0.224682	0.427002	FALSE	-0.0236103	2.44603	0.145479
YCR011C	ADP1	-0.0514984	0.694499	0.832339	FALSE
YCR023C	YCR023C	-0.0435918	0.665282	0.811782	FALSE	-0.429195	16.8712	0
YCR024C-A	PMP1	-0.0840224	0.0661712	0.188128	FALSE	-0.763892	48.6842	0
YCR024C-B	YCR024C-B	0.0496653	0.00377837	0.0192044	FALSE	-0.0504986	3.18019	0.0491147
YCR031C	RPS14A	-0.108929	0.00739429	0.0341255	FALSE	0.00506571	0.597109	0.845361
YCR033W	SNT1	-0.0474304	0.810474	0.907373	FALSE	-0.340013	4.91947	0.0017991
YCR035C	RRP43	-0.128381	0.267442	0.47385	FALSE	-0.018775	0.74199	0.778906
YCR041W	YCR041W	0.045502	0.83294	0.91877	FALSE
YCR042C	TAF2	-0.0130219	0.932127	0.97139	FALSE	-0.0165598	2.30377	0.172879
YCR046C	IMG1	-0.0879518	0.1136	0.275936	FALSE
YCR047C	BUD23	0.0562808	0.578059	0.757698	FALSE
YCR071C	IMG2	-0.0576754	0.343368	0.550402	FALSE
YCR072C	RSA4	-0.234919	0.0940644	0.241467	FALSE
YCR073C	SSK22	0.0693107	0.704353	0.837936	FALSE
YCR075C	ERS1	0.00135153	0.986068	0.997542	FALSE
YCR076C	FUB1	0.171897	0.0558012	0.165235	FALSE
YCR077C	PAT1	-0.135836	0.081729	0.220431	FALSE
YCR083W	TRX3	0.292248	0.0918849	0.238351	FALSE
YCR087C-A	YCR087C-A	0.140965	0.110729	0.271161	FALSE	0.172857	11.4171	0
YCR087W	YCR087W	0.140965	0.110729	0.271161	FALSE	0.0396532	0.432515	0.914346
YCR093W	CDC39	0.0595087	0.632653	0.794318	FALSE	0.0978529	3.15659	0.0508106
YDL002C	NHP10	0.0540531	0.495967	0.694551	FALSE	0.072002	0.948534	0.680605
YDL003W	MCD1	0.070925	0.612889	0.7816	FALSE	0.0130457	0.480668	0.894041
YDL004W	ATP16	-0.18275	8.29492e-15	1.80319e-13	FALSE
YDL005C	MED2	0.163898	0.166133	0.35168	FALSE	-0.0217635	0.557307	0.862193
YDL006W	PTC1	0.318207	0.0062133	0.0290844	FALSE	0.134656	6.622	0.000403226
YDL008W	APC11	-0.41013	0.0148529	0.0607444	FALSE	-0.131848	6.44752	0.000403226
YDL009C	YDL009C	0.0886689	0.381071	0.587928	FALSE
YDL010W	GRX6	0.0210286	0.8297	0.916628	FALSE	-0.0973427	4.91727	0.0017991
YDL012C	YDL012C	-0.311645	0.0174225	0.0691516	FALSE	-0.273277	87.1692	0
YDL015C	TSC13	-0.0371151	0.308057	0.514216	FALSE	-0.0181338	1.35915	0.499415
YDL016C	YDL016C	-0.0337064	0.430505	0.632004	FALSE	-0.0847726	0.886937	0.712672
YDL017W	CDC7	0.0289875	0.904181	0.960109	FALSE	0.112013	1.28082	0.53151
YDL020C	RPN4	0.0860794	0.39666	0.600407	FALSE	0.201039	11.3877	0
YDL022W	GPD1	-3.21354e-05	0.99923	1	FALSE
YDL025C	RTK1	0.199006	0.0462173	0.144801	FALSE	-0.01155	2.10913	0.217943
YDL035C	GPR1	-0.0826917	0.746844	0.866795	FALSE	0.00585822	0.174159	0.989325
YDL045W-A	MRP10	0.0670522	0.316448	0.522961	FALSE	0.0660919	3.03751	0.0634011
YDL046W	NPC2	0.0665065	0.110701	0.271161	FALSE
YDL047W	SIT4	-0.0778604	0.320269	0.527436	FALSE
YDL048C	STP4	-0.377141	0.00984461	0.0432673	FALSE	0.070476	1.56923	0.406342
YDL050C	YDL050C	0.0589525	0.217145	0.418589	FALSE
YDL051W	LHP1	0.0589525	0.217145	0.418589	FALSE	0.00151879	0.474327	0.897048
YDL052C	SLC1	0.235676	0.000429154	0.00288759	FALSE
YDL053C	PBP4	0.0174854	0.743397	0.865256	FALSE	-0.00967688	0.374441	0.934261
YDL067C	COX9	-0.108535	0.0248029	0.0904424	FALSE	0.0114107	0.782685	0.762987
YDL076C	RXT3	0.00760179	0.944444	0.978014	FALSE	-0.0640368	2.2486	0.186386
YDL077C	VAM6	0	1	1	FALSE	0.0499382	1.25503	0.545109
YDL080C	THI3	-0.159647	0.309094	0.515338	FALSE	0.00383113	2.64476	0.10837
YDL081C	RPP1A	-0.0471699	0.0230249	0.0851679	FALSE	0.0226504	5.7021	0.000403226
YDL082W	RPL13A	-0.142436	0.503012	0.697845	FALSE	0.0106806	1.03473	0.642709
YDL085C-A	YDL085C-A	0.117108	0.055303	0.164329	FALSE	-0.00814128	0.548968	0.866746
YDL086W	YDL086W	-0.11353	0.127861	0.298624	FALSE	-0.171976	15.2457	0
YDL087C	LUC7	-0.136476	0.544818	0.731428	FALSE	-0.0145135	1.94932	0.262304
YDL088C	ASM4	-0.12969	0.219446	0.422737	FALSE	-0.0222279	0.727309	0.786214
YDL089W	NUR1	-0.0869631	0.429499	0.631465	FALSE	-0.152825	4.76987	0.0026011
YDL090C	RAM1	-0.414955	0.00815611	0.036971	FALSE	0.108905	3.5573	0.0248096
YDL091C	UBX3	0.127833	0.573307	0.753215	FALSE	-0.0791678	1.48353	0.441646
YDL092W	SRP14	0.0909916	0.0531854	0.159896	FALSE	0.0406203	3.00458	0.0679282
YDL094C	YDL094C	0.105285	0.114795	0.277901	FALSE
YDL095W	PMT1	0.0832799	0.121404	0.288736	FALSE
YDL097C	RPN6	-0.0859508	0.155392	0.336463	FALSE
YDL098C	SNU23	-0.0709517	0.673765	0.818598	FALSE
YDL099W	BUG1	-0.154175	0.339566	0.546617	FALSE
YDL100C	GET3	-0.0982593	0.0736181	0.203566	FALSE
YDL101C	DUN1	-0.101921	0.409568	0.612402	FALSE	-0.0924402	1.88687	0.284356
YDL102W	POL3	0.303682	0.199661	0.396794	FALSE	0.0271865	0.727523	0.786104
YDL103C	QRI1	0.00321599	0.97286	0.992528	FALSE	0.00300478	1.80168	0.31423
YDL104C	QRI7	0.264152	0.192657	0.389171	FALSE	0.075734	1.64231	0.376934
YDL106C	PHO2	0.133792	0.381017	0.587928	FALSE	-0.0914803	1.09415	0.61437
YDL107W	MSS2	0.0260558	0.857464	0.934227	FALSE	0.245301	5.29522	0.000653595
YDL108W	KIN28	0.136027	0.3334	0.540246	FALSE	0.0896425	2.44737	0.145309
YDL110C	TMA17	-0.0322854	0.670296	0.8163	FALSE
YDL111C	RRP42	-0.208377	0.0368974	0.122817	FALSE	-0.00458119	0.159641	0.990689
YDL112W	TRM3	-0.122543	0.434309	0.636265	FALSE	-0.0460896	0.624063	0.832393
YDL115C	IWR1	-0.129609	0.257026	0.465214	FALSE	-0.0219822	1.30552	0.521673
YDL116W	NUP84	0.0956082	0.335288	0.541753	FALSE	-0.118095	4.22991	0.00763158
YDL117W	CYK3	0.112043	0.341538	0.54809	FALSE	0.0146991	0.213284	0.980726
YDL119C	HEM25	-0.0899484	0.561588	0.745443	FALSE	0.0325682	1.5703	0.405843
YDL120W	YFH1	-0.220683	0	0	FALSE	-0.0959853	3.88178	0.0145103
YDL123W	SNA4	-0.255333	0.13225	0.304365	FALSE	-0.0530147	1.96161	0.25742
YDL124W	YDL124W	-1.23467	1.24765e-91	1.85571e-89	FALSE	-0.539793	382.363	0
YDL125C	HNT1	-1.14375	0	0	FALSE
YDL126C	CDC48	0.0962362	0.0280229	0.0996136	FALSE
YDL127W	PCL2	0.371467	0.000439234	0.00294141	FALSE
YDL128W	VCX1	-0.0896678	0.0957408	0.243751	FALSE
YDL130W	RPP1B	-0.468797	8.9376e-11	1.43509e-09	FALSE
YDL130W-A	STF1	0.148966	0.000445161	0.00297406	FALSE
YDL131W	LYS21	-0.0345646	0.445086	0.646691	FALSE
YDL132W	CDC53	0.311427	0.1824	0.377621	FALSE
YDL133C-A	RPL41B	-0.306074	0.000960925	0.00585253	FALSE	0.00855399	1.44097	0.46221
YDL135C	RDI1	0.037166	0.510195	0.704697	FALSE
YDL136W	RPL35B	0.270104	1.34647e-09	1.97157e-08	FALSE
YDL138W	RGT2	-0.239659	0.154723	0.335798	FALSE
YDL139C	SCM3	0.222434	0.231861	0.437702	FALSE
YDL140C	RPO21	-0.0920229	0.215684	0.41691	FALSE	-0.000841394	1.26034	0.542381
YDL141W	BPL1	-0.0357609	0.700245	0.835443	FALSE	0.0182952	1.36647	0.496494
YDL143W	CCT4	-0.145852	0.0418301	0.134332	FALSE	0.0581777	3.47468	0.0298385
YDL144C	YDL144C	-0.0209887	0.782987	0.888644	FALSE
YDL146W	LDB17	-0.100128	0.580241	0.758446	FALSE	-0.0868199	0.895404	0.707862
YDL147W	RPN5	-0.197664	0.000157318	0.00116079	FALSE	-0.090001	9.04239	0
YDL148C	NOP14	-0.265966	0.0385382	0.126934	FALSE	-0.0288096	0.498326	0.88695
YDL149W	ATG9	0.0747355	0.535894	0.723281	FALSE	0.0812561	1.29232	0.527858
YDL150W	RPC53	-0.42182	0.00994279	0.0436309	FALSE	-0.0276973	0.620471	0.833565
YDL155W	CLB3	0.109473	0.390141	0.595644	FALSE	0.0430591	1.24241	0.550326
YDL157C	YDL157C	0.206938	0.000522063	0.00341516	FALSE	0.0991566	11.6403	0
YDL158C	YDL158C	0.15021	0.0173414	0.0689266	FALSE	-1.07371	22.2357	0
YDL159W	STE7	0.149058	0.0177625	0.0702472	FALSE	0.0433081	0.39771	0.927066
YDL160C	DHH1	0.251314	0.221886	0.424306	FALSE	0.184119	3.38005	0.034609
YDL164C	CDC9	-0.0585421	0.64694	0.802217	FALSE
YDL165W	CDC36	0.219936	0.0444967	0.139875	FALSE	-0.0110592	1.65396	0.372432
YDL166C	FAP7	0.202306	0.220197	0.42301	FALSE	0.0308214	1.09139	0.615629
YDL167C	NRP1	0.788891	2.51133e-35	1.54283e-33	FALSE
YDL168W	SFA1	1.11476	1.71979e-79	2.31435e-77	FALSE
YDL169C	UGX2	-0.167583	0.153865	0.334478	FALSE
YDL170W	UGA3	0.0727886	0.579385	0.758379	FALSE
YDL171C	GLT1	0.128907	0.00229856	0.0124918	FALSE	0.276494	10.3719	0
YDL174C	DLD1	0.243057	0.017638	0.0699086	FALSE	0.0862016	4.0475	0.0103797
YDL176W	YDL176W	0.0253178	0.910422	0.963025	FALSE	0.22817	3.95528	0.0114286
YDL177C	YDL177C	0.0910934	0.385233	0.591845	FALSE	-0.0568647	2.79254	0.0886341
YDL178W	DLD2	-0.0262353	0.749802	0.867352	FALSE	-0.0213012	0.707163	0.796686
YDL179W	PCL9	0.0443004	0.591599	0.765853	FALSE	0.0017041	0.0600613	0.99825
YDL180W	YDL180W	0.278338	0.0341719	0.11512	FALSE	-0.0195201	1.32267	0.514371
YDL181W	INH1	-0.0341211	0.282706	0.49044	FALSE	-0.0026109	1.20118	0.571275
YDL182W	LYS20	-0.356675	0.147749	0.326979	FALSE	-0.0251713	2.33947	0.166031
YDL185W	VMA1	-29.7696	0.999923	1	FALSE	0.000520935	1.76768	0.327573
YDL192W	ARF1	-0.026291	0.149558	0.329168	FALSE	0.0174997	2.55388	0.123577
YDL193W	NUS1	-0.323898	0.0672953	0.190038	FALSE	-0.109013	3.64662	0.0220281
YDL195W	SEC31	-0.338966	0.156051	0.336897	FALSE
YDL197C	ASF2	-0.22536	0.151352	0.331309	FALSE
YDL198C	GGC1	0.0308905	0.546869	0.732095	FALSE
YDL199C	YDL199C	-0.426778	0.0205004	0.0779733	FALSE	0.389709	8.834	0
YDL200C	MGT1	-0.221112	0.0310656	0.107852	FALSE	-0.0375583	0.705528	0.797375
YDL202W	MRPL11	-0.183322	0.129586	0.300665	FALSE	-0.063893	0.785834	0.76106
YDL203C	ACK1	-0.020452	0.876701	0.943083	FALSE	0.0469998	0.647244	0.822443
YDL204W	RTN2	-0.271703	0.0713168	0.198172	FALSE	-0.0646253	1.34042	0.5082
YDL206W	YDL206W	0.0669946	0.577224	0.757305	FALSE	0.0986386	2.56868	0.121714
YDL207W	GLE1	-0.390402	6.20564e-05	0.000492616	FALSE	-0.0989817	4.42657	0.00544959
YDL208W	NHP2	0.0157479	0.715564	0.847521	FALSE	0.0851587	11.7863	0
YDL209C	CWC2	-0.188723	0.193723	0.390015	FALSE	-0.0824432	5.0761	0.0017991
YDL211C	YDL211C	-0.211756	0.198496	0.395593	FALSE
YDL212W	SHR3	-0.313682	8.21885e-25	3.36615e-23	FALSE
YDL213C	NOP6	-0.401853	4.74006e-08	5.65207e-07	FALSE	-0.136325	10.6332	0
YDL215C	GDH2	0.108972	0.406529	0.609679	FALSE	-0.0153913	0.147467	0.992147
YDL216C	RRI1	-1.1188	6.67929e-05	0.000527254	FALSE	-1.21909	35.9002	0
YDL217C	TIM22	-0.482924	5.29713e-06	4.94049e-05	FALSE
YDL219W	DTD1	-0.369098	0.0336853	0.114142	FALSE
YDL221W	YDL221W	0.319659	0.183499	0.378517	FALSE
YDL224C	WHI4	0.259637	0.0547525	0.163098	FALSE	0.0707036	1.7556	0.332574
YDL230W	PTP1	-0.0551526	0.73058	0.857757	FALSE	-0.0597373	0.880523	0.714965
YDL243C	AAD4	-1.16499	3.01647e-09	4.24107e-08	FALSE	-1.05087	66.6554	0
YDR001C	NTH1	0.241526	0.00117241	0.00693143	FALSE	0.391268	57.1836	0
YDR002W	YRB1	-0.0773436	0.00845001	0.0379043	FALSE	-0.0218696	2.19521	0.197178
YDR003W	RCR2	0.121213	0.567673	0.749511	FALSE	0.218261	3.90271	0.0137402
YDR003W-A	YDR003W-A	-0.039191	0.639933	0.797729	FALSE	0.018761	1.73069	0.341966
YDR007W	TRP1	-0.128175	0.0431288	0.137044	FALSE	0.0540705	2.29058	0.175149
YDR008C	YDR008C	-0.125417	0.0489325	0.1508	FALSE
YDR021W	FAL1	-0.204095	0.270125	0.476043	FALSE
YDR026C	NSI1	0.638538	2.45056e-06	2.42142e-05	FALSE	0.0256692	0.695232	0.801858
YDR028C	REG1	0.0593858	0.701622	0.835912	FALSE
YDR031W	MIX14	0.000592828	0.982643	0.996394	FALSE	0.0630387	1.54468	0.417486
YDR032C	PST2	0.000592828	0.982643	0.996394	FALSE	-0.00206158	1.96048	0.25777
YDR033W	MRH1	-1.12576	0	0	TRUE
YDR034C	LYS14	0.039306	0.673443	0.818579	FALSE
YDR034W-B	YDR034W-B	-0.0042222	0.974286	0.992907	FALSE
YDR038C	ENA5	-2.64135	6.54483e-22	2.28342e-20	FALSE
YDR044W	HEM13	-0.646627	0.000511455	0.00336133	FALSE	-0.0901009	1.29527	0.526378
YDR049W	VMS1	0.208392	0.182989	0.378017	FALSE
YDR050C	TPI1	-0.0320306	0.0558384	0.165235	FALSE
YDR055W	PST1	0.0913851	0.262595	0.469544	FALSE	-0.0335898	0.168474	0.990085
YDR056C	EMC10	-0.204893	0.0822761	0.221021	FALSE	-0.0207676	1.83857	0.302075
YDR057W	YOS9	-0.261477	0.0667676	0.189063	FALSE	-0.0138958	0.127518	0.99409
YDR059C	UBC5	-0.205933	0.00536444	0.0258701	FALSE	-0.108821	5.63527	0.000403226
YDR060W	MAK21	-0.0761599	0.664445	0.811593	FALSE	0.00233527	1.47539	0.446158
YDR063W	AIM7	0.143658	0.143436	0.320182	FALSE	0.0962589	7.77108	0
YDR064W	RPS13	-0.0230111	0.0502046	0.152886	FALSE	0.0192902	5.49934	0.000653595
YDR065W	RRG1	0.196263	0.204167	0.401515	FALSE	0.176219	1.66001	0.369568
YDR066C	RTR2	0.121446	0.315391	0.52153	FALSE	0.154258	3.73284	0.0194809
YDR067C	OCA6	-0.229648	0.0539181	0.161412	FALSE
YDR068W	DOS2	-0.197948	0.0479468	0.148899	FALSE
YDR069C	DOA4	-0.199796	0.243704	0.454293	FALSE
YDR072C	IPT1	0.0393077	0.615161	0.783083	FALSE	-0.0229092	1.12737	0.599996
YDR073W	SNF11	-0.126796	0.107493	0.266235	FALSE
YDR074W	TPS2	0.218439	0.00245066	0.0132167	FALSE
YDR075W	PPH3	-0.156576	0.398463	0.602491	FALSE
YDR076W	RAD55	0.0699586	0.675921	0.820512	FALSE
YDR077W	SED1	-0.271694	3.58146e-46	2.89177e-44	TRUE
YDR078C	SHU2	-0.381353	0.000677342	0.00426318	FALSE	-0.232957	7.77565	0
YDR079C-A	TFB5	0.126665	0.126328	0.295777	FALSE	0.127946	5.09403	0.00150376
YDR079W	PET100	0.126665	0.126328	0.295777	FALSE	-0.0649367	3.40285	0.0332039
YDR080W	VPS41	-0.183431	0.181403	0.376114	FALSE	-0.197869	6.83422	0.000403226
YDR081C	PDC2	-0.296215	0.0135181	0.0559327	FALSE	-0.12121	3.05565	0.0615108
YDR089W	VTC5	-0.326034	0.00228711	0.0124535	FALSE
YDR090C	YDR090C	-0.0866467	0.408498	0.611125	FALSE
YDR111C	ALT2	-0.276987	0.152099	0.332687	FALSE	0.162972	2.01665	0.242107
YDR113C	PDS1	0.274062	0.242794	0.453194	FALSE	0.0332061	0.280143	0.963335
YDR121W	DPB4	-0.011696	0.913881	0.963025	FALSE	-0.157745	6.63825	0.000403226
YDR129C	SAC6	0.078676	0.14563	0.323726	FALSE	0.00367003	0.281826	0.962942
YDR133C	YDR133C	1.30185	0	0	TRUE	0.655104	714.787	0
YDR135C	YCF1	0.0562055	0.535934	0.723281	FALSE
YDR137W	RGP1	-0.478498	0.0121583	0.0511299	FALSE	-0.0776744	1.996	0.246799
YDR138W	HPR1	-0.0947515	0.660728	0.811593	FALSE	0.121918	3.63894	0.0227562
YDR139C	RUB1	0.0857408	0.0432345	0.137044	FALSE	0.107491	5.87744	0.000403226
YDR140W	MTQ2	-0.283746	0.0242169	0.0887638	FALSE	-0.0841124	2.11686	0.216745
YDR141C	DOP1	-0.293995	0.0182298	0.0715411	FALSE
YDR142C	PEX7	-0.106368	0.54947	0.734186	FALSE
YDR143C	SAN1	-0.494696	0.0512329	0.155181	FALSE	-0.143441	3.84884	0.0153669
YDR144C	MKC7	-0.410536	0.00330699	0.0170539	FALSE	-0.445887	32.1058	0
YDR145W	TAF12	-0.0939594	0.262291	0.469544	FALSE	-0.287971	23.6119	0
YDR146C	SWI5	-0.261184	0.152587	0.333497	FALSE	-0.109307	2.06732	0.229104
YDR147W	EKI1	0.314993	0.0590897	0.172508	FALSE
YDR148C	KGD2	-0.0987374	0.22561	0.42819	FALSE	-0.0456654	2.91306	0.0760844
YDR149C	YDR149C	-0.155255	0.326848	0.534532	FALSE
YDR150W	NUM1	-0.332908	0.00883746	0.0395169	FALSE	0.0421048	2.54816	0.124277
YDR153C	ENT5	-0.372589	0.00255075	0.0136523	FALSE
YDR156W	RPA14	0.0632453	0.312743	0.519154	FALSE	0.0181039	0.860503	0.727111
YDR157W	YDR157W	0.0199538	0.777897	0.885175	FALSE	0.0607083	0.771887	0.768305
YDR163W	CWC15	-0.300105	0.150265	0.329697	FALSE	-0.037216	0.506678	0.883238
YDR170C	SEC7	0.180958	0.0252472	0.0917075	FALSE	0.154891	10.9434	0
YDR172W	SUP35	-0.0679648	0.220486	0.42301	FALSE
YDR174W	HMO1	0.0401028	0.372278	0.579327	FALSE	-0.00344034	0.664831	0.813862
YDR177W	UBC1	0.283974	5.01752e-09	6.88326e-08	FALSE	0.136968	22.3973	0
YDR178W	SDH4	0.0142449	0.736915	0.861971	FALSE	0.189078	4.82049	0.0017991
YDR179C	CSN9	-0.127155	0.478279	0.676823	FALSE	0.0217879	4.22945	0.00763158
YDR179W-A	NVJ3	0.0191379	0.870769	0.939234	FALSE	0.0768554	0.909879	0.699274
YDR180W	SCC2	0.115915	0.3615	0.567368	FALSE	0.0128808	1.02371	0.64707
YDR181C	SAS4	0.0442966	0.73979	0.863095	FALSE	-0.000798938	3.06742	0.0597216
YDR183C-A	YDR183C-A	-0.488353	0.00472717	0.023233	FALSE	0.125646	0.989535	0.662379
YDR183W	PLP1	0.495467	0.00241226	0.0130595	FALSE	-0.0142949	1.39971	0.481364
YDR184C	ATC1	-0.423766	0.00896279	0.039888	FALSE	-0.0694517	1.54259	0.418204
YDR185C	UPS3	-0.192979	0.159321	0.34239	FALSE	-0.313193	3.30824	0.0418837
YDR192C	NUP42	0.109431	0.638207	0.796281	FALSE	-0.143975	2.37904	0.158469
YDR204W	COQ4	0.377155	0.000644676	0.00408379	FALSE	0.2465	16.0236	0
YDR205W	MSC2	-0.0650321	0.695479	0.833159	FALSE	-0.0299484	1.63598	0.3788
YDR207C	UME6	-0.501092	0.0161116	0.0648595	FALSE	0.0467858	0.81518	0.747558
YDR208W	MSS4	-0.0452335	0.82114	0.911804	FALSE	0.0095452	3.53256	0.0255641
YDR209C	YDR209C	-0.27841	6.92798e-08	8.15769e-07	FALSE
YDR210W	YDR210W	-0.299288	2.13858e-12	3.84945e-11	FALSE	-0.234125	42.0244	0
YDR211W	GCD6	-0.158004	0.221471	0.424116	FALSE
YDR214W	AHA1	-0.0485408	0.511105	0.70561	FALSE	0.0717054	4.40706	0.00596206
YDR230W	YDR230W	0.0365531	0.544713	0.731428	FALSE
YDR231C	COX20	0.0631817	0.295259	0.502349	FALSE	0.0601126	4.38483	0.00635152
YDR232W	HEM1	-0.00895416	0.915301	0.963025	FALSE
YDR233C	RTN1	-0.0468736	0.331701	0.539731	FALSE
YDR235W	PRP42	0.0812954	0.442135	0.644792	FALSE	0.0280498	0.363771	0.938161
YDR236C	FMN1	5.50199e-06	0.999967	1	FALSE	0.001099	0.339389	0.94364
YDR238C	SEC26	-0.0305286	0.618857	0.785436	FALSE
YDR239C	YDR239C	-0.0904813	0.60085	0.773225	FALSE	0.0115142	0.807309	0.751379
YDR243C	PRP28	0.0969056	0.688249	0.827656	FALSE	0.0120143	1.54203	0.418397
YDR251W	PAM1	-0.2053	0.101246	0.255553	FALSE	-0.0496403	1.2047	0.569598
YDR252W	BTT1	-0.298391	0.0879828	0.230222	FALSE	-0.243679	4.10784	0.00852959
YDR253C	MET32	-0.202757	0.272817	0.479466	FALSE	-0.134108	6.65456	0.000403226
YDR256C	CTA1	-0.138749	0.500138	0.696938	FALSE
YDR259C	YAP6	0.153787	0.459607	0.660672	FALSE	-0.0336174	1.79289	0.316736
YDR260C	SWM1	-0.0162605	0.928155	0.969674	FALSE	-0.0202576	0.555595	0.863164
YDR261C	EXG2	0.0327898	0.856318	0.933624	FALSE	-0.014341	0.427395	0.915954
YDR270W	CCC2	0.245576	0.115921	0.279884	FALSE	-0.0571231	3.03784	0.0633638
YDR271C	YDR271C	0.23771	0.131377	0.3033	FALSE
YDR276C	PMP3	0.000703622	0.964231	0.988483	TRUE	-0.0124297	3.462	0.030353
YDR287W	INM2	-0.0741081	0.594472	0.768257	FALSE	0.0248293	0.203096	0.983468
YDR292C	SRP101	-0.048023	0.716825	0.848459	FALSE	-0.00447434	0.132486	0.993517
YDR295C	HDA2	0.338226	0.0254369	0.091924	FALSE	0.345431	19.9747	0
YDR296W	MHR1	0.135765	0.0700699	0.196251	FALSE	-0.0353786	2.04557	0.233805
YDR297W	SUR2	0.0428945	0.636547	0.795965	FALSE
YDR298C	ATP5	-0.214385	1.28499e-16	3.21362e-15	FALSE
YDR305C	HNT2	-0.148084	0.292925	0.50035	FALSE	0.0142495	1.13959	0.593167
YDR307W	PMT7	0.155165	0.141267	0.317092	FALSE	0.0995601	2.18318	0.200543
YDR316W	OMS1	0.0305812	0.863737	0.936654	FALSE	-0.058817	0.766105	0.770355
YDR317W	HIM1	-0.143101	0.51305	0.706569	FALSE	-1.87656	23.1427	0
YDR318W	MCM21	0.0951888	0.341275	0.54798	FALSE	0.0920989	3.01393	0.0668127
YDR319C	YFT2	0.0504399	0.519531	0.71061	FALSE
YDR320C	SWA2	0.198851	0.297247	0.503952	FALSE
YDR320C-A	DAD4	0.213634	1.61136e-08	2.0329e-07	FALSE
YDR320W-B	YDR320W-B	0.213293	1.69629e-08	2.13054e-07	FALSE
YDR321W	ASP1	-0.253443	1.88062e-05	0.000166082	FALSE	-0.131671	13.0551	0
YDR331W	GPI8	0.130245	0.188592	0.384223	FALSE	-0.0217952	0.755361	0.774172
YDR341C	YDR341C	0.152614	0.234468	0.44122	FALSE	0.117005	11.8245	0
YDR342C	HXT7	-0.097441	0.469488	0.670867	FALSE	0.0834667	2.15305	0.206965
YDR351W	SBE2	-0.164554	0.188713	0.384223	FALSE	-0.0888131	2.36654	0.160561
YDR354W	TRP4	-0.0402003	0.748386	0.867134	FALSE	-0.175148	15.1156	0
YDR356W	SPC110	0.43029	0.00379004	0.0192292	FALSE	0.0844082	1.63254	0.379723
YDR357C	CNL1	-0.277459	1.13676e-05	0.000102308	FALSE	-0.320392	40.6011	0
YDR367W	KEI1	0.193267	0.00232217	0.0125959	FALSE	0.289922	45.1941	0
YDR371W	CTS2	-0.505978	0.000217991	0.00155175	FALSE	0.0506385	0.45625	0.9046
YDR372C	VPS74	-0.21959	0.00286165	0.0150877	FALSE	0.0172314	1.12761	0.599929
YDR374W-A	WIP1	0.202212	0.00064595	0.00408379	FALSE	0.0199177	2.50215	0.134886
YDR375C	BCS1	0.202095	0.000606043	0.00388362	FALSE	-0.102742	1.91302	0.275512
YDR377W	ATP17	-0.0383294	0.16202	0.345821	FALSE	0.0193445	1.15253	0.587681
YDR378C	LSM6	-0.0383294	0.16202	0.345821	FALSE	0.0217687	0.675441	0.80957
YDR380W	ARO10	0.505644	0.0152681	0.0619936	FALSE
YDR381C-A	YDR381C-A	0.328504	0.0656715	0.187084	FALSE	-0.0152754	0.847794	0.733278
YDR382W	RPP2B	-0.851004	4.91601e-19	1.41762e-17	FALSE	-0.00791118	1.73493	0.340534
YDR383C	NKP1	-0.630259	4.1449e-14	8.48804e-13	FALSE	0.0595126	1.15966	0.58489
YDR384C	ATO3	0.00811241	0.949232	0.980527	FALSE	0.101184	3.74523	0.0194444
YDR391C	YDR391C	0.0886818	0.354466	0.559934	FALSE	0.097657	2.73252	0.0952363
YDR393W	SHE9	0.00131142	0.991955	0.999738	FALSE	0.0426859	1.27442	0.53437
YDR400W	URH1	0.0979491	0.307225	0.51313	FALSE
YDR402C	DIT2	0.138576	0.278179	0.484968	FALSE
YDR403W	DIT1	0.369747	0.0796336	0.216389	FALSE	0.116648	0.493633	0.888996
YDR405W	MRP20	0.270753	0.00557671	0.0265026	FALSE
YDR406W	PDR15	0.100519	0.606337	0.777022	FALSE
YDR406W-A	YDR406W-A	0.0555699	0.738915	0.862882	FALSE
YDR407C	TRS120	-2.9855e-10	1	1	FALSE	0.0396141	0.662773	0.814764
YDR410C	STE14	-0.350445	0.000195541	0.00140611	FALSE	0.0550365	2.25488	0.185541
YDR423C	CAD1	-1.14722	6.11929e-09	8.19579e-08	FALSE	-1.9046	532.502	0
YDR436W	PPZ2	-0.0399368	0.849584	0.928791	FALSE
YDR439W	LRS4	-0.0317462	0.858602	0.934692	FALSE
YDR441C	APT2	-1.0149	8.81115e-15	1.88639e-13	FALSE	0.017463	2.28834	0.175701
YDR443C	SSN2	0.875384	0.000105984	0.000809491	FALSE	0.305257	4.81171	0.0017991
YDR446W	ECM11	0.139645	1.43865e-09	2.08494e-08	FALSE
YDR447C	RPS17B	0.139645	1.43865e-09	2.08494e-08	FALSE	-0.0112677	1.70684	0.349983
YDR451C	YHP1	-0.0506621	0.713912	0.846273	FALSE	-0.24072	19.4377	0
YDR452W	PPN1	0.12423	0.209783	0.408296	FALSE	-0.0185077	2.46397	0.14249
YDR453C	TSA2	-0.198023	0.0752284	0.207816	FALSE	0.00891156	0.976684	0.666932
YDR458C	HEH2	0.150931	0.155581	0.336463	FALSE	-0.000888188	0.275366	0.964616
YDR461C-A	YDR461C-A	0.083999	0.517207	0.709528	FALSE	-0.0873603	2.10567	0.219006
YDR471W	RPL27B	-0.148904	0.205875	0.40291	FALSE	-0.0149731	1.77525	0.323831
YDR475C	JIP4	0.111336	0.362433	0.568388	FALSE	-0.0794929	1.53847	0.41998
YDR477W	SNF1	-0.0725583	0.442608	0.644792	FALSE	0.0550644	1.80106	0.314433
YDR478W	SNM1	0.229638	0.0341258	0.11512	FALSE	0.530469	33.4015	0
YDR479C	PEX29	0.241474	0.0527524	0.158763	FALSE	0.0290632	0.974911	0.667904
YDR481C	PHO8	0.124623	0.132052	0.304365	FALSE	0.273368	9.06355	0
YDR492W	IZH1	0.239506	0.0441077	0.138961	FALSE	0.0174364	2.41133	0.150803
YDR496C	PUF6	0.0929835	0.468759	0.67074	FALSE	-0.0288674	1.23051	0.555163
YDR497C	ITR1	-0.307388	1.57277e-25	7.16879e-24	FALSE	-0.128825	27.829	0
YDR498C	SEC20	-0.287095	0.0168504	0.0674491	FALSE	0.130997	3.97476	0.0113302
YDR499W	LCD1	0.0792122	0.585315	0.761556	FALSE
YDR501W	PLM2	-0.111226	0.637525	0.796281	FALSE	0.0660468	0.450894	0.906494
YDR502C	SAM2	-0.180259	1.27153e-13	2.51282e-12	TRUE	0.0781263	6.95294	0.000403226
YDR503C	LPP1	0.0146381	0.883665	0.948045	FALSE	0.0924584	2.12243	0.215469
YDR504C	SPG3	-0.0257371	0.806813	0.905505	FALSE	-0.0575853	0.513947	0.880389
YDR505C	PSP1	0.50644	4.37873e-05	0.000362882	FALSE	0.380974	7.92273	0
YDR507C	GIN4	-0.405769	0.00242988	0.0131297	FALSE
YDR508C	GNP1	-0.954548	1.253e-09	1.84426e-08	FALSE
YDR510C-A	YDR510C-A	0.414777	5.51063e-17	1.42872e-15	FALSE
YDR510W	SMT3	0.293505	2.70988e-10	4.18476e-09	FALSE
YDR511W	SDH7	-0.220772	0.000259812	0.00181291	FALSE	-0.0835177	1.6541	0.372368
YDR512C	EMI1	-0.0999396	0.0276358	0.0987052	FALSE	0.12255	7.11732	0.000403226
YDR513W	GRX2	-0.0540515	0.0783316	0.214033	FALSE
YDR514C	YDR514C	-0.359186	1.40944e-06	1.44315e-05	FALSE
YDR515W	SLF1	0.165341	0.204472	0.40169	FALSE
YDR516C	EMI2	-0.204179	0.115975	0.279884	FALSE
YDR524C	AGE1	0.152077	0.169582	0.357441	FALSE
YDR524C-B	YDR524C-B	-0.0376227	0.00414662	0.0207772	FALSE
YDR525W-A	SNA2	0.411235	1.26488e-44	9.66091e-43	FALSE
YDR526C	YDR526C	0.0738513	0.73954	0.863095	FALSE
YDR527W	RBA50	0.0639098	0.548079	0.732881	FALSE
YDR528W	HLR1	0.587019	0.000177889	0.00128901	FALSE
YDR529C	QCR7	-0.0578656	0.00573506	0.0270572	FALSE
YDR530C	APA2	0.134993	0.24848	0.458072	FALSE
YDR531W	CAB1	0.221182	0.000612682	0.00391728	FALSE
YDR532C	KRE28	0.196197	0.00128856	0.00753929	FALSE
YDR533C	HSP31	0.288859	4.06748e-06	3.90976e-05	FALSE
YDR538W	PAD1	-0.48554	0.0253162	0.0918403	FALSE	-0.104185	0.973264	0.668806
YDR539W	FDC1	0.532413	1.05574e-06	1.08888e-05	FALSE	0.404504	42.7977	0
YDR541C	YDR541C	0.184283	0.226162	0.428949	FALSE
YEL006W	YEA6	-0.128216	0.13088	0.302426	FALSE	-0.136833	3.36895	0.0356748
YEL007W	MIT1	0.118335	0.109827	0.270123	FALSE	5.78995e-05	2.89759	0.0775538
YEL017W	GTT3	-0.379924	0.000220667	0.00156685	FALSE	-0.237469	18.8238	0
YEL022W	GEA2	-0.0243914	0.8759	0.94261	FALSE	-0.0427473	0.747057	0.777332
YEL027W	VMA3	0.0215712	0.0587991	0.172015	FALSE	0.0219812	5.38263	0.000653595
YEL034C-A	YEL034C-A	-0.201866	0.191732	0.388133	FALSE
YEL034W	HYP2	-0.201866	0.191732	0.388133	FALSE	-0.0024019	1.23484	0.553342
YEL036C	ANP1	-0.221192	0.00745129	0.0342396	FALSE
YEL037C	RAD23	0.455142	3.29402e-10	5.03184e-09	FALSE
YEL038W	UTR4	-0.461197	7.94242e-11	1.28259e-09	FALSE
YEL039C	CYC7	-0.617957	7.62394e-14	1.53895e-12	FALSE
YEL040W	UTR2	-0.275949	0.000311711	0.00215278	FALSE
YEL041W	YEF1	-1.35473	6.44956e-22	2.27831e-20	FALSE	-0.767745	22.9444	0
YEL042W	GDA1	-0.122423	0.269494	0.476023	FALSE	-0.0297362	0.957392	0.676806
YEL043W	YEL043W	0.0530796	0.749575	0.867352	FALSE	0.0275776	0.592934	0.847062
YEL050C	RML2	-0.0658852	0.596472	0.770046	FALSE
YEL050W-A	YEL050W-A	-0.187212	0.275622	0.482472	FALSE
YEL051W	VMA8	-0.0807456	0.491507	0.690014	FALSE
YEL052W	AFG1	0.168437	0.201611	0.399266	FALSE
YEL053C	MAK10	0.0540672	0.816175	0.90914	FALSE
YEL055C	POL5	0.073492	0.415846	0.618912	FALSE
YEL056W	HAT2	0.128599	0.195537	0.391629	FALSE
YEL057C	SDD1	0.532889	2.55811e-05	0.000221077	TRUE
YEL058W	PCM1	-0.0405984	0.519482	0.71061	FALSE
YEL059C-A	SOM1	0.0110262	0.949963	0.980527	FALSE
YEL060C	PRB1	-0.188119	0.306637	0.513058	FALSE
YEL061C	CIN8	0.269619	0.0825615	0.221439	FALSE	-0.0198964	0.700858	0.799344
YEL062W	NPR2	-0.276508	0.069215	0.194233	FALSE	0.132839	1.90436	0.278138
YEL063C	CAN1	0.101614	0.181802	0.376667	FALSE
YEL064C	AVT2	-0.131475	0.569961	0.751212	FALSE
YEL065W	SIT1	0.010608	0.965107	0.988483	FALSE
YEL066W	HPA3	0.0312171	0.624417	0.78812	FALSE
YEL068C	YEL068C	0.183829	0.0501013	0.152886	FALSE
YEL071W	DLD3	-0.0843769	0.00622648	0.0290844	FALSE
YEL072W	RMD6	-0.0689541	0.36738	0.573599	FALSE
YEL074W	YEL074W	-12.0055	0.613294	0.781763	FALSE
YER002W	NOP16	-0.223144	0.346779	0.553323	FALSE	-0.0063753	3.53949	0.02519
YER005W	YND1	0.0859414	0.583618	0.761089	FALSE
YER006C-A	YER006C-A	0.194436	0.0191895	0.0744085	FALSE
YER006W	NUG1	0.203124	0.0127051	0.0528008	FALSE
YER007C-A	TMA20	-0.166733	0.00491054	0.0240089	FALSE	0.00281327	1.25377	0.545747
YER007W	PAC2	-0.208846	0.082017	0.220743	FALSE	0.152586	2.14936	0.207282
YER008C	SEC3	-0.32868	0.0633128	0.182202	FALSE
YER012W	PRE1	-0.0575397	0.266024	0.472226	FALSE	0.00677636	2.09268	0.222668
YER017C	AFG3	-0.216043	0.141625	0.317644	FALSE
YER018C	SPC25	-0.32607	0.00246421	0.0132393	FALSE
YER019C-A	SBH2	-0.0412663	0.203746	0.401466	FALSE
YER019W	ISC1	-0.0344374	0.687416	0.827103	TRUE
YER020W	GPA2	-0.0767254	0.394851	0.598311	FALSE
YER021W	RPN3	-0.0102554	0.872942	0.940501	FALSE
YER022W	SRB4	-0.0975437	0.379593	0.587475	FALSE	0.125748	2.64747	0.107737
YER023C-A	YER023C-A	-0.0826458	0.0272677	0.0977899	FALSE
YER023W	PRO3	-0.00792884	0.808359	0.906517	FALSE	-0.0374261	4.2344	0.00763158
YER024W	YAT2	0.333976	0.102952	0.25837	FALSE
YER025W	GCD11	-0.0953845	0.0580569	0.170215	FALSE
YER026C	CHO1	-0.268234	1.73844e-21	5.58278e-20	FALSE
YER027C	GAL83	0.418307	5.71478e-05	0.000459279	FALSE
YER028C	MIG3	0.308838	0.0879592	0.230222	FALSE
YER029C	SMB1	0.123473	0.186181	0.382097	FALSE
YER030W	CHZ1	-0.320283	5.57509e-07	5.98881e-06	FALSE
YER035W	EDC2	-0.198379	0.00266436	0.0141798	FALSE
YER036C	ARB1	-0.139653	0.132258	0.304365	FALSE
YER037W	PHM8	-0.26103	0.187057	0.38235	FALSE
YER038C	KRE29	-0.439334	0.0301041	0.104771	FALSE	0.0843771	0.397796	0.927051
YER038W-A	FMP49	0.0182606	0.892528	0.953604	FALSE
YER039C	HVG1	0.0272717	0.839764	0.923925	FALSE	-0.0111786	0.464061	0.9016
YER042W	MXR1	-0.282558	1.21342e-05	0.000108861	FALSE
YER043C	SAH1	-0.0883023	2.13735e-06	2.14952e-05	FALSE
YER044C	ERG28	0.0579331	0.388428	0.593472	FALSE
YER045C	ACA1	-0.105654	0.542902	0.729548	FALSE
YER046W	SPO73	-0.366069	0.000312329	0.00215278	FALSE	-0.128193	6.57625	0.000403226
YER046W-A	YER046W-A	-0.384762	0.0576217	0.169624	FALSE
YER047C	SAP1	-0.331364	0.0770556	0.211828	FALSE	0.0304582	0.948011	0.680888
YER048C	CAJ1	0.157364	0.0724417	0.200903	FALSE
YER048W-A	ISD11	0.274282	1.35118e-18	3.78064e-17	FALSE
YER049W	TPA1	-0.233874	0.102106	0.256717	FALSE
YER050C	RSM18	0.14757	0.374881	0.582415	FALSE
YER051W	JHD1	-0.0885533	0.638208	0.796281	FALSE
YER052C	HOM3	0.249507	0.000241657	0.00169881	FALSE
YER053C	PIC2	-0.475657	2.04367e-05	0.000179361	FALSE
YER054C	GIP2	0.0873589	0.716957	0.848459	FALSE	-0.220751	3.66262	0.0211607
YER055C	HIS1	0.00461701	0.936719	0.973224	FALSE
YER058W	PET117	0.0035762	0.966903	0.988973	FALSE	-0.0837207	1.77335	0.324783
YER059W	PCL6	0.109083	0.429868	0.631465	FALSE	0.0108139	3.50468	0.0272385
YER062C	GPP2	0.0287333	0.605081	0.777022	FALSE	-0.0645859	3.11174	0.0547576
YER071C	TDA2	-0.0647583	0.388508	0.593472	FALSE	0.0551695	2.28187	0.177533
YER080W	AIM9	-0.0364409	0.787512	0.892345	FALSE	0.0377635	0.611759	0.838905
YER087C-A	YER087C-A	-0.166602	0.324141	0.531027	FALSE
YER087C-B	SBH1	-0.151188	0.000134871	0.00100832	FALSE	-0.0375797	3.1806	0.0491045
YER087W	AIM10	-0.166602	0.324141	0.531027	FALSE	-0.153353	2.87377	0.0798076
YER088C	DOT6	0.138131	0.137317	0.31206	FALSE
YER088C-A	YER088C-A	0.307485	0.0988357	0.250727	FALSE	0.276197	2.45484	0.144065
YER091C	MET6	0.270072	0.0940746	0.241467	FALSE	0.0324982	2.94437	0.0748732
YER093C	TSC11	0.340927	0.140391	0.316889	FALSE	-0.138107	0.916591	0.69575
YER101C	AST2	-0.0948309	0.559389	0.743572	FALSE	-0.0417038	0.686191	0.805611
YER102W	RPS8B	-0.338035	1.18683e-21	3.89998e-20	FALSE	-0.0175145	4.46644	0.00497925
YER104W	RTT105	-0.0837808	0.539495	0.726007	FALSE	0.221712	5.2763	0.000653595
YER105C	NUP157	-0.0592493	0.634443	0.795427	FALSE	0.109452	4.16516	0.00776197
YER114C	BOI2	0.273196	0.133432	0.30632	FALSE	0.15288	3.62312	0.0232027
YER115C	SPR6	-0.247677	0.0407087	0.131477	FALSE	-0.070682	1.30185	0.523226
YER117W	RPL23B	0.197006	1.28563e-14	2.73171e-13	FALSE	0.004517	2.28633	0.17627
YER119C	AVT6	-0.176011	0.12138	0.288736	FALSE	-0.227382	14.1264	0
YER120W	SCS2	-0.302728	0.0191961	0.0744085	FALSE	-0.109652	28.6122	0
YER125W	RSP5	0.0585072	0.356934	0.561634	FALSE
YER126C	NSA2	0.0570912	0.374391	0.582295	FALSE
YER127W	LCP5	0.385632	0.095064	0.243343	FALSE
YER129W	SAK1	-0.431998	0.0487617	0.150602	FALSE	0.0520688	0.73485	0.782256
YER130C	COM2	-0.215156	0.0363919	0.121564	FALSE	-0.0211932	0.116085	0.994827
YER132C	PMD1	-0.231786	0.133897	0.307137	FALSE	-0.0437856	3.17589	0.0493017
YER145C	FTR1	-0.0813828	0.0560253	0.165615	FALSE	-0.0981901	47.8269	0
YER150W	SPI1	0.392756	0.0171038	0.0681783	FALSE	0.238543	9.82088	0
YER156C	YER156C	0.0321706	0.534785	0.723281	FALSE	-0.0129925	3.61703	0.0232558
YER158C	YER158C	0.268374	0.0516435	0.15609	FALSE
YER162C	RAD4	0.134917	0.42711	0.629308	FALSE	-0.0984951	1.21616	0.563988
YER163C	GCG1	0.166823	0.0132135	0.0547527	FALSE
YER164W	CHD1	-0.294881	0.0578508	0.169944	FALSE	-0.0646337	1.05795	0.633152
YER165C-A	YER165C-A	0.335047	0.0548276	0.163098	FALSE
YER165W	PAB1	-0.0832239	0.683635	0.824211	FALSE	0.030183	1.38928	0.486486
YER166W	DNF1	0.123239	0.50092	0.697187	FALSE	0.0428772	4.01154	0.0107466
YER167W	BCK2	0.216371	0.0712202	0.198099	FALSE	-0.0406989	2.2139	0.192232
YER168C	CCA1	0.121266	0.294098	0.501582	FALSE
YER169W	RPH1	0.13815	0.457972	0.659984	FALSE
YER170W	ADK2	-0.0448789	0.755798	0.871434	FALSE
YER171W	RAD3	-0.0861571	0.480869	0.679469	FALSE	-0.0455158	1.05916	0.632664
YER172C	BRR2	-0.0918802	0.32254	0.529326	FALSE	-0.0806073	1.92302	0.27299
YER173W	RAD24	-0.166721	0.186959	0.38235	FALSE	-0.0716461	1.06865	0.62705
YER174C	GRX4	-0.186586	0.134686	0.308446	FALSE	-0.0504042	4.99175	0.0017991
YER176W	ECM32	-0.0690782	0.608041	0.778226	FALSE	-0.0809383	3.07912	0.0584641
YER178W	PDA1	0.0127414	0.70033	0.835443	FALSE	-0.00945468	2.74166	0.0945542
YER180C	ISC10	-0.0241617	0.88477	0.948045	FALSE	0.0884774	1.60775	0.388888
YER182W	FMP10	0.154981	0.068729	0.193262	FALSE	0.0993896	1.86734	0.291703
YER183C	FAU1	0.0796531	0.235404	0.442322	FALSE	-0.0264815	0.947992	0.680899
YER186C	YER186C	-0.111682	0.249191	0.458777	FALSE	-0.0771419	1.98071	0.250529
YER187W	YER187W	1.74874	6.00766e-14	1.22141e-12	FALSE	2.6123	238.273	0
YFL001W	DEG1	-0.183573	0.241757	0.451856	FALSE	-0.237146	9.24159	0
YFL002C	SPB4	-0.206561	0.14584	0.323726	FALSE
YFL004W	VTC2	0.019874	0.777952	0.885175	FALSE
YFL005W	SEC4	0.0598869	0.104332	0.260002	FALSE	-0.0534763	3.96261	0.0114286
YFL007W	BLM10	-0.0148252	0.908831	0.962063	FALSE	0.0272533	1.28696	0.529844
YFL008W	SMC1	-0.0154439	0.915761	0.963025	FALSE
YFL009W	CDC4	-0.475732	0.00155493	0.00891326	FALSE
YFL010C	WWM1	-0.522342	4.09985e-25	1.72928e-23	FALSE
YFL010W-A	AUA1	-0.524607	2.88501e-25	1.27391e-23	FALSE
YFL013C	IES1	0.0293025	0.399214	0.60305	TRUE
YFL013W-A	YFL013W-A	-0.0349451	0.810098	0.907373	FALSE
YFL014W	HSP12	-0.0963826	0.000134422	0.00100763	TRUE
YFL016C	MDJ1	-0.0588243	0.690855	0.829026	FALSE
YFL017C	GNA1	0.0221939	0.630903	0.793472	FALSE	0.106263	9.58568	0
YFL017W-A	SMX2	0.0286203	0.675782	0.820512	FALSE	0.061428	0.763047	0.771294
YFL018C	LPD1	-0.260838	7.15138e-06	6.60451e-05	FALSE
YFL021C-A	YFL021C-A	0.0907983	0.33938	0.546617	FALSE
YFL021W	GAT1	-0.210985	0.000851912	0.00526806	FALSE
YFL024C	EPL1	-0.397462	0.044225	0.139176	FALSE
YFL025C	BST1	-0.182838	0.153277	0.333933	FALSE
YFL026W	STE2	-0.0260911	0.903126	0.960027	FALSE
YFL027C	GYP8	-0.412599	0.0624796	0.180696	FALSE
YFL028C	CAF16	-0.0936576	0.15921	0.34239	FALSE
YFL029C	CAK1	-0.0736204	0.412113	0.615231	FALSE
YFL030W	AGX1	-0.0390443	0.684798	0.825262	FALSE
YFL031C-A	YFL031C-A	-0.114192	0.355259	0.560246	FALSE
YFL031W	HAC1	-0.0755178	7.91523e-08	9.24316e-07	FALSE	-0.0803499	32.5844	0
YFL034C-A	RPL22B	-0.00667924	0.867836	0.938219	FALSE
YFL034C-B	MOB2	0.0496237	0.627419	0.791204	FALSE
YFL036W	RPO41	-0.00704223	0.951107	0.981317	FALSE
YFL037W	TUB2	-0.0153071	0.701048	0.835666	FALSE
YFL038C	YPT1	0.0354055	0.348603	0.554801	FALSE
YFL039C	ACT1	-0.0346787	0.648245	0.802982	FALSE
YFL040W	YFL040W	-0.0247665	0.750904	0.867917	FALSE
YFL041W	FET5	0.162904	0.0892231	0.232606	FALSE
YFL041W-A	YFL041W-A	-0.0587939	0.761009	0.874118	FALSE
YFL042C	LAM5	-0.291755	0.0432567	0.137044	FALSE
YFL044C	OTU1	0.125511	0.313293	0.519277	FALSE	0.108083	4.34405	0.00671141
YFL045C	SEC53	-0.0575971	0.00218869	0.012057	FALSE	-0.0716143	18.1863	0
YFL046W	FMP32	-0.0233051	0.672223	0.81778	FALSE	0.0923232	2.11301	0.217266
YFL047W	RGD2	0.0944473	0.538499	0.725565	FALSE
YFL048C	EMP47	0.0552777	0.485076	0.684386	FALSE
YFL049W	SWP82	-0.158563	0.219778	0.42301	FALSE
YFL050C	ALR2	-0.0333362	0.850427	0.928994	FALSE
YFL054C	AQY3	-0.290719	0.11349	0.275936	FALSE
YFL059W	SNZ3	0.437214	0.057762	0.16986	FALSE	3.77651	126.507	0
YFL062W	COS4	0.995993	0	0	FALSE	0.230968	4.20937	0.00763976
YFR001W	LOC1	0.0598305	0.450961	0.652876	FALSE	0.0452912	1.36967	0.495193
YFR002W	NIC96	0.154151	0.535547	0.723281	FALSE
YFR003C	YPI1	0.145699	0.0400203	0.129848	FALSE
YFR004W	RPN11	0.0570692	0.640765	0.798235	FALSE	0.0421954	2.69381	0.101011
YFR005C	SAD1	-0.201322	0.0692804	0.194233	FALSE	-0.0783532	1.20066	0.571521
YFR009W	GCN20	0.0211631	0.840105	0.923925	FALSE	0.113827	3.53372	0.0255015
YFR013W	IOC3	-0.179563	0.329193	0.537435	FALSE
YFR014C	CMK1	0.284205	0.00218758	0.012057	FALSE	0.23096	15.67	0
YFR015C	GSY1	0.169252	0.269679	0.476023	FALSE	0.0397782	1.06454	0.629557
YFR016C	YFR016C	-0.031934	0.799164	0.901384	FALSE	0.013928	0.428931	0.91564
YFR019W	FAB1	-0.17872	0.257409	0.46541	FALSE	-0.0662961	1.26075	0.54213
YFR021W	ATG18	0.0289869	0.904183	0.960109	FALSE	0.0740886	0.919909	0.694009
YFR027W	ECO1	0.971583	4.93271e-06	4.64661e-05	FALSE	-0.00624118	3.67489	0.0207675
YFR028C	CDC14	-0.1116	0.502022	0.697381	FALSE	-0.195808	2.74405	0.0942269
YFR032C-A	RPL29	-0.21734	4.48474e-80	6.33694e-78	TRUE	0.0245452	1.7909	0.317283
YFR034W-A	YFR034W-A	-0.25494	0.000315205	0.00216732	FALSE	-0.254684	2.97766	0.0717075
YFR035C	YFR035C	-0.255363	8.78629e-07	9.16239e-06	FALSE
YFR036W	CDC26	-0.0129153	0.929214	0.970063	FALSE
YFR036W-A	YFR036W-A	-0.125753	0.128426	0.298946	FALSE
YFR037C	RSC8	-0.0893848	0.28456	0.492156	FALSE
YFR038W	IRC5	-0.199089	0.0589898	0.172394	FALSE	0.0794171	11.0199	0
YFR039C	OSW7	-0.0685626	0.539329	0.726007	FALSE	0.00453978	1.419	0.473595
YFR040W	SAP155	0.066123	0.599032	0.771588	FALSE	-0.27223	9.33355	0
YFR042W	KEG1	0.219	4.48931e-06	4.2815e-05	FALSE	0.240409	17.1748	0
YFR043C	IRC6	0.185438	0.000492827	0.00325404	FALSE	0.0821549	4.84244	0.0017991
YFR044C	DUG1	-0.00266484	0.97	0.991041	FALSE
YFR045W	YFR045W	0.140616	0.29078	0.498933	FALSE	0.00758743	3.51723	0.0263961
YFR047C	BNA6	-0.0771225	0.240371	0.45037	FALSE
YFR048W	RMD8	-0.194549	0.345309	0.552573	FALSE
YFR052C-A	YFR052C-A	-0.0523056	0.440959	0.643673	FALSE	-0.0794205	1.01697	0.65008
YFR053C	HXK1	-0.0248068	0.718319	0.848615	FALSE	-0.0324023	1.13466	0.596295
YGL002W	ERP6	-0.0604328	0.47465	0.674602	FALSE	-0.0625457	1.84774	0.299458
YGL003C	CDH1	-0.130711	0.43187	0.633021	FALSE
YGL004C	RPN14	0.210688	0.083449	0.22311	FALSE
YGL005C	COG7	-0.0947435	0.284779	0.492156	FALSE	0.000408604	2.82275	0.0845909
YGL006W	PMC1	-0.394786	7.78668e-06	7.14453e-05	FALSE	0.114992	3.94391	0.0117917
YGL006W-A	YGL006W-A	0.37269	0.00626359	0.0292094	FALSE
YGL007C-A	YGL007C-A	0.204095	0.270125	0.476043	FALSE
YGL008C	PMA1	0.065775	2.86266e-06	2.79927e-05	FALSE
YGL010W	MPO1	0.329479	0.107626	0.266332	FALSE	0.133874	3.19497	0.0483056
YGL011C	SCL1	-0.0621686	0.167982	0.354532	FALSE	-0.00569868	0.626846	0.831484
YGL012W	ERG4	-0.0753519	0.118663	0.284429	FALSE	0.0421123	2.70383	0.0995773
YGL014W	PUF4	-0.256103	0.0664674	0.188781	FALSE	-0.456872	24.9505	0
YGL015C	YGL015C	0.0369727	0.814542	0.90914	FALSE
YGL016W	KAP122	0.0128077	0.934023	0.97139	FALSE	-0.0705768	0.48981	0.89065
YGL017W	ATE1	0.435562	0.0298912	0.104158	FALSE	0.279766	13.4942	0
YGL018C	JAC1	0.219035	0.113655	0.275936	FALSE	0.136927	3.00158	0.0681844
YGL019W	CKB1	-0.0433227	0.428101	0.630111	FALSE
YGL020C	GET1	0.0892421	0.0709471	0.197534	FALSE
YGL021W	ALK1	0.06396	0.244216	0.454646	FALSE
YGL023C	PIB2	-0.213584	0.192551	0.389171	FALSE	-0.0476065	1.03102	0.644505
YGL025C	PGD1	0.357157	0.0218055	0.0819448	FALSE	-0.0527753	2.08145	0.22486
YGL031C	RPL24A	0.0368879	9.23097e-05	0.000714705	FALSE	0.0284021	9.0609	0
YGL035C	MIG1	0.0602912	0.734673	0.860417	FALSE	0.0450123	0.802506	0.753
YGL037C	PNC1	0.0837703	0.0318585	0.109662	FALSE
YGL042C	YGL042C	-0.0990699	0.137846	0.312393	FALSE
YGL043W	DST1	-0.0925877	0.163498	0.347925	FALSE	0.0522329	2.81476	0.0852031
YGL044C	RNA15	-0.138573	0.294863	0.502055	FALSE	0.0703431	0.92934	0.69038
YGL045W	RIM8	0.0697692	0.713364	0.845979	FALSE	-0.0974693	1.83913	0.301928
YGL048C	RPT6	0.0350761	0.546175	0.732095	FALSE
YGL050W	TYW3	0.194623	0.0852301	0.226585	FALSE	0.178832	7.96779	0
YGL055W	OLE1	-1.15862	0	0	FALSE
YGL056C	SDS23	0.169346	0.176141	0.36697	FALSE	0.0409527	0.64653	0.822723
YGL057C	GEP7	-0.317977	0.00391454	0.0198252	FALSE	-0.477342	16.4437	0
YGL058W	RAD6	-0.0318712	0.698073	0.834852	FALSE
YGL061C	DUO1	-0.174098	0.271187	0.477195	FALSE
YGL065C	ALG2	0.138639	0.305876	0.512392	FALSE	0.0633926	0.826468	0.744671
YGL067W	NPY1	-0.333023	0.00393786	0.0198783	FALSE
YGL068W	MNP1	-0.0717709	0.103312	0.25837	FALSE
YGL069C	YGL069C	-0.0717709	0.103312	0.25837	FALSE
YGL070C	RPB9	-0.107289	0.477306	0.676123	FALSE
YGL071W	AFT1	-0.147789	0.520413	0.71061	FALSE
YGL072C	YGL072C	-0.170626	0.453425	0.654433	FALSE
YGL073W	HSF1	0.0420744	0.780199	0.885835	FALSE
YGL076C	RPL7A	-4.32783	1.97696e-49	1.80222e-47	FALSE
YGL077C	HNM1	-0.0330063	0.512852	0.706569	FALSE	0.0557427	3.45656	0.0305494
YGL078C	DBP3	-0.163472	0.252887	0.46018	FALSE	-0.0297111	0.803608	0.752628
YGL080W	MPC1	0.271315	0.0729137	0.202014	FALSE	0.0393382	3.16916	0.0496522
YGL082W	YGL082W	0.0362288	0.661422	0.811593	FALSE	-0.100615	4.56897	0.00422998
YGL083W	SCY1	0.0228932	0.912105	0.963025	FALSE	-0.0812681	2.85086	0.0816656
YGL084C	GUP1	0.0283817	0.806323	0.905505	FALSE	-0.0283536	0.658605	0.81673
YGL085W	LCL3	0.0354383	0.760679	0.874118	FALSE	-0.111823	1.54448	0.417555
YGL091C	NBP35	0.00502338	0.960033	0.986564	FALSE	-0.0089224	0.76358	0.77113
YGL094C	PAN2	-0.320908	0.137274	0.31206	FALSE	-0.152057	3.18139	0.0490849
YGL095C	VPS45	-0.213574	0.260775	0.468499	FALSE
YGL099W	LSG1	-0.177681	0.431559	0.632894	FALSE	-0.0629476	3.98274	0.0111575
YGL100W	SEH1	0.0826919	0.520455	0.71061	FALSE	-0.0116776	2.08455	0.224319
YGL101W	YGL101W	0.0717391	0.250836	0.459669	FALSE	0.0959625	3.06021	0.0610509
YGL102C	YGL102C	-0.239822	0	0	TRUE
YGL103W	RPL28	-0.239821	0	0	TRUE	-0.00313048	3.1596	0.0506514
YGL105W	ARC1	0.292663	0.0334494	0.113616	FALSE
YGL106W	MLC1	0.0856283	0.0391809	0.128419	FALSE	0.23547	25.8915	0
YGL108C	YGL108C	-0.0612736	0.567069	0.749199	FALSE
YGL109W	YGL109W	-0.0612736	0.567069	0.749199	FALSE
YGL110C	CUE3	-0.246231	0.145918	0.323726	FALSE	-0.166856	3.9478	0.0115599
YGL111W	NSA1	-0.07182	0.495148	0.693747	FALSE	-0.126088	5.21758	0.000653595
YGL114W	YGL114W	0.389096	0.0144143	0.0591835	FALSE	-0.0247709	0.423171	0.91682
YGL116W	CDC20	-0.0836157	0.584124	0.761089	FALSE
YGL117W	YGL117W	0.00156825	0.990879	0.999723	FALSE	0.217351	20.6395	0
YGL126W	SCS3	-0.257262	5.2814e-06	4.94049e-05	TRUE	0.773641	33.3667	0
YGL130W	CEG1	0.00773038	0.956305	0.983762	FALSE	-0.0436117	0.392543	0.927927
YGL134W	PCL10	0.0359406	0.811049	0.907373	FALSE	0.0454386	1.25455	0.54535
YGL136C	MRM2	-0.147774	0.122284	0.289051	FALSE	0.15542	3.48373	0.0291132
YGL137W	SEC27	-0.147774	0.122284	0.289051	FALSE	0.214992	22.2883	0
YGL139W	FLC3	0.173236	0.105898	0.26344	FALSE
YGL143C	MRF1	-0.179048	0.345348	0.552573	FALSE	-0.00400085	0.775144	0.76683
YGL144C	ROG1	0.570545	0.020053	0.0767884	FALSE	-0.00559374	0.959445	0.675971
YGL145W	TIP20	-0.120628	0.583356	0.761089	FALSE	0.115486	2.21389	0.192235
YGL147C	RPL9A	0.130507	7.86489e-61	8.89047e-59	FALSE	-0.000844937	0.278165	0.963862
YGL150C	INO80	0.171148	0.274884	0.481688	FALSE	-0.00477454	0.152321	0.991699
YGL151W	NUT1	0.12963	0.387953	0.593266	FALSE	-0.0392227	0.833045	0.742456
YGL152C	YGL152C	0.0880126	0.559751	0.743703	FALSE
YGL153W	PEX14	0.00808977	0.954497	0.983379	FALSE	-0.110655	3.85364	0.0152671
YGL154C	LYS5	-0.0188747	0.905847	0.960211	FALSE	0.0508258	0.851739	0.731252
YGL157W	ARI1	-0.0501273	0.492546	0.691129	FALSE	0.111422	4.35871	0.00650789
YGL159W	YGL159W	-0.134033	0.246233	0.457198	FALSE	-0.0703227	1.67292	0.364339
YGL160W	AIM14	0.233561	0.128205	0.298688	FALSE	-0.00603623	0.640405	0.825126
YGL163C	RAD54	-0.0464848	0.791628	0.89595	FALSE	-0.0466449	1.91487	0.275084
YGL164C	YRB30	0.0841521	0.587564	0.762352	FALSE	-0.133701	5.43983	0.000653595
YGL165C	YGL165C	-0.132489	0.289304	0.497609	FALSE
YGL166W	CUP2	-0.132489	0.289304	0.497609	FALSE	-0.029956	0.744781	0.778039
YGL167C	PMR1	-0.288846	5.93213e-08	7.01431e-07	FALSE
YGL168W	HUR1	-0.304252	1.90594e-08	2.36236e-07	FALSE
YGL169W	SUA5	-0.0331677	0.588886	0.76304	FALSE
YGL170C	SPO74	-0.272602	0.205105	0.402518	FALSE
YGL171W	ROK1	-0.134733	0.486776	0.684806	FALSE	-0.182333	5.60842	0.000403226
YGL172W	NUP49	0.088557	0.444439	0.646691	FALSE	-0.0323725	0.992281	0.661644
YGL173C	XRN1	-0.0869263	0.400824	0.604123	FALSE	0.0181827	0.580211	0.85132
YGL176C	YGL176C	-0.116349	0.512696	0.706569	FALSE	-0.0667526	1.13736	0.594583
YGL187C	COX4	-0.21783	5.0556e-10	7.59953e-09	FALSE	-0.0932827	3.92548	0.0126062
YGL190C	CDC55	0.059617	0.538577	0.725565	FALSE
YGL191W	COX13	-0.11988	1.70802e-06	1.73006e-05	FALSE
YGL192W	IME4	-0.0637394	0.761219	0.874118	FALSE
YGL194C-A	YGL194C-A	0.165335	0.011415	0.0485824	FALSE
YGL195W	GCN1	-0.0114032	0.869254	0.939033	FALSE
YGL196W	DSD1	-0.0940066	0.256673	0.465214	FALSE
YGL197W	MDS3	0.0491215	0.772076	0.880858	FALSE
YGL198W	YIP4	-0.0632266	0.214939	0.415754	FALSE	0.00923534	0.693666	0.802565
YGL200C	EMP24	0.217765	2.13107e-17	5.5763e-16	FALSE	-0.0215628	1.62627	0.381711
YGL201C	MCM6	0.276139	0.00941148	0.0416226	FALSE
YGL202W	ARO8	-0.117483	0.0192209	0.0744085	FALSE
YGL203C	KEX1	-0.319809	0.0956043	0.243701	FALSE	-0.0474126	5.15439	0.000653595
YGL204C	YGL204C	1.06003	4.61558e-05	0.000379176	FALSE	1.36623	25.3939	0
YGL206C	CHC1	-0.0538144	0.473996	0.674602	FALSE
YGL207W	SPT16	0.112846	0.193672	0.390015	FALSE
YGL208W	SIP2	0.0293404	0.836024	0.921453	FALSE
YGL209W	MIG2	-0.177314	0.220355	0.42301	FALSE	-0.13293	5.10619	0.00131866
YGL211W	NCS6	-0.10638	0.444757	0.646691	FALSE	-0.0138323	0.900018	0.704693
YGL212W	VAM7	0.314422	0.189994	0.385721	FALSE	0.694469	31.1998	0
YGL215W	CLG1	-0.410545	0.000702134	0.00439962	FALSE	0.0495204	2.53848	0.126584
YGL216W	KIP3	0.445871	0.0244486	0.0893815	FALSE	-0.00140686	0.868297	0.721701
YGL219C	MDM34	-0.046294	0.448327	0.650396	FALSE	-0.0573829	0.726759	0.786497
YGL222C	EDC1	0.464306	0.0158051	0.0639976	FALSE	0.219442	3.02145	0.0655797
YGL223C	COG1	0.537469	3.69097e-05	0.000311364	FALSE	1.37325	99.3445	0
YGL224C	SDT1	-0.0629061	0.222264	0.424691	TRUE
YGL225W	VRG4	-0.0420604	0.405984	0.609299	TRUE
YGL226C-A	OST5	0.48943	4.18745e-27	2.0403e-25	TRUE	-0.024443	1.28555	0.530228
YGL226W	MTC3	-0.104367	0.284914	0.492156	FALSE	-0.150251	7.8461	0
YGL228W	SHE10	-0.107482	0.199296	0.396347	FALSE	0.0012074	0.367671	0.936945
YGL229C	SAP4	0.129669	0.57603	0.75609	FALSE	0.0199083	1.36368	0.497627
YGL237C	HAP2	0.123672	0.327698	0.535303	FALSE
YGL241W	KAP114	0.283362	0.103143	0.25837	FALSE	0.169567	2.73476	0.0951
YGL242C	YGL242C	-0.169869	0.0789241	0.214874	FALSE	-0.0552379	1.81405	0.309969
YGL243W	TAD1	0.0436364	0.79843	0.901103	FALSE	0.0158332	0.757513	0.77327
YGL244W	RTF1	0.0222232	0.8815	0.947194	FALSE	0.0149452	0.399869	0.926706
YGL247W	BRR6	-0.130385	0.400732	0.604123	FALSE	0.1104	2.21238	0.19255
YGL252C	RTG2	0.376475	0.0162785	0.065438	FALSE	0.119762	7.95386	0
YGL253W	HXK2	-0.364373	8.76516e-22	2.91416e-20	FALSE	-0.213073	82.4313	0
YGL255W	ZRT1	-0.22745	0.0245649	0.0896903	FALSE	-0.192077	180.254	0
YGL256W	ADH4	-0.0933392	0.385627	0.591845	FALSE
YGL257C	MNT2	-0.168792	0.0521095	0.157307	FALSE
YGL263W	COS12	-0.453907	0.0103389	0.0450892	FALSE	-0.298271	4.33331	0.00686605
YGR001C	EFM5	-0.173446	0.289191	0.497609	FALSE	-0.040292	2.43999	0.146247
YGR002C	SWC4	0.0218464	0.865682	0.937325	FALSE	-0.0508255	1.02516	0.646593
YGR003W	CUL3	0.323055	0.0680132	0.191439	FALSE	0.242082	2.94183	0.0749077
YGR004W	PEX31	0.115138	0.471673	0.672526	FALSE	-0.173277	1.87806	0.287434
YGR007W	ECT1	-0.0207819	0.422073	0.624802	FALSE
YGR008C	STF2	-0.0151252	0.574304	0.754174	FALSE
YGR009C	SEC9	0.0290166	0.826952	0.91574	FALSE
YGR012W	MCY1	-0.194175	0.188434	0.38421	FALSE	0.132844	3.74274	0.0194444
YGR014W	MSB2	-0.120631	0.132533	0.304751	FALSE	0.000851144	1.01262	0.65264
YGR015C	YGR015C	0.130033	0.352574	0.558506	FALSE	-0.142827	2.79788	0.0877382
YGR019W	UGA1	0.0584001	0.499064	0.696632	FALSE	0.0646636	4.33388	0.00685285
YGR020C	VMA7	-0.101235	0.0488591	0.150738	FALSE
YGR023W	MTL1	0.14707	0.375226	0.582632	FALSE
YGR026W	YGR026W	-0.106066	0.0288836	0.101524	FALSE	-0.0114146	0.512468	0.8809
YGR027C	RPS25A	-0.087923	7.19111e-22	2.46537e-20	FALSE	0.00184727	0.774161	0.767275
YGR028W	MSP1	0.0366565	0.661408	0.811593	FALSE	0.0519127	1.33108	0.511257
YGR029W	ERV1	0.0598416	0.400672	0.604123	FALSE	0.0459882	2.41003	0.150957
YGR030C	POP6	0.24796	0.00318359	0.0165383	FALSE
YGR032W	GSC2	0.135786	0.109293	0.269279	FALSE
YGR033C	TIM21	0.0578057	0.519186	0.71061	FALSE
YGR035W-A	YGR035W-A	-0.0378365	0.819091	0.910405	FALSE
YGR037C	ACB1	0.176804	0.0735619	0.203566	FALSE
YGR038W	ORM1	-0.70675	1.35535e-12	2.48716e-11	FALSE
YGR039W	YGR039W	-0.451241	0.0398985	0.12962	FALSE	-0.870605	5.98946	0.000403226
YGR042W	MTE1	0.194812	0.155611	0.336463	FALSE	0.103873	2.412	0.150723
YGR046W	TAM41	-0.0439503	0.718019	0.848615	FALSE
YGR048W	UFD1	-0.105361	0.491501	0.690014	FALSE	0.0312517	1.62745	0.381299
YGR050C	YGR050C	-0.0831197	0.381641	0.588375	FALSE	-0.0381842	0.565439	0.857631
YGR054W	YGR054W	0.0753781	0.362752	0.568573	FALSE	0.0438344	2.4667	0.142075
YGR071C	ENV11	-0.435318	0.0118846	0.0501283	FALSE	0.0634335	0.377376	0.932966
YGR081C	SLX9	-0.106682	0.305143	0.51177	FALSE	-0.0247971	1.22547	0.558408
YGR082W	TOM20	0.0194182	0.794331	0.897839	FALSE	-0.00223194	0.392124	0.927996
YGR084C	MRP13	0.0931869	0.448298	0.650396	FALSE	0.0147991	0.522388	0.877371
YGR088W	CTT1	0.0746661	0.25885	0.467418	FALSE	-0.0823111	1.43789	0.46375
YGR104C	SRB5	0.0541553	0.696817	0.834409	FALSE	-0.0201581	0.250676	0.970188
YGR109C	CLB6	0.282862	0.123485	0.291535	FALSE	0.101493	1.03787	0.641189
YGR118W	RPS23A	1.40478e-07	0.999999	1	FALSE	0.00361029	0.632511	0.829156
YGR119C	NUP57	0.0373336	0.757669	0.87288	FALSE	0.0351219	2.2399	0.186747
YGR128C	UTP8	0.096374	0.38578	0.591845	FALSE	0.0573543	2.78631	0.0897928
YGR142W	BTN2	-0.164756	0.321191	0.528647	FALSE	-0.00487751	1.01378	0.651959
YGR148C	RPL24B	0.0689812	0.000342268	0.00234769	FALSE	0.00439042	0.36092	0.93905
YGR149W	GPC1	0.0759636	0.67346	0.818579	FALSE	-0.00194209	1.2305	0.555166
YGR151C	YGR151C	0.20336	0.0533337	0.160171	FALSE	0.0041894	1.61263	0.386843
YGR152C	RSR1	0.213211	0.0423256	0.135308	FALSE	-0.00126342	0.426554	0.916127
YGR153W	YGR153W	-0.119583	0.422238	0.624802	FALSE	-0.0859432	2.53406	0.127823
YGR154C	GTO1	-0.0381282	0.813838	0.90914	FALSE	0.168219	3.9668	0.0114286
YGR155W	CYS4	-0.00107345	0.980263	0.996394	FALSE
YGR156W	PTI1	-0.210328	0.189423	0.385115	FALSE
YGR157W	CHO2	-0.0789521	0.0547902	0.163098	FALSE
YGR158C	MTR3	0.190853	0.0296716	0.103777	FALSE	0.0375172	0.705138	0.797539
YGR161C	RTS3	-0.0235164	0.791645	0.89595	FALSE
YGR165W	MRPS35	0.105361	0.646508	0.802033	FALSE	-0.00990756	0.747556	0.777176
YGR166W	TRS65	0.474458	0.0487057	0.150593	FALSE	-0.0235313	2.26686	0.182351
YGR167W	CLC1	-0.00351278	0.933631	0.97139	FALSE	0.00632993	0.627693	0.831208
YGR168C	YGR168C	-0.587043	0.00054488	0.003548	FALSE	-0.168733	3.66469	0.0210504
YGR169C	PUS6	-0.357306	0.0849145	0.225959	FALSE	-0.0106786	0.843753	0.735527
YGR176W	YGR176W	-0.4698	0.018154	0.0713535	FALSE
YGR177C	ATF2	-0.4698	0.018154	0.0713535	FALSE	-0.0283489	0.607056	0.841239
YGR178C	PBP1	-0.0405818	0.589663	0.763698	FALSE
YGR179C	OKP1	-0.194672	0.226693	0.42938	FALSE	-0.110414	1.76443	0.329137
YGR180C	RNR4	-0.134728	0.00557999	0.0265026	FALSE	0.00443694	1.67163	0.364801
YGR181W	TIM13	0.0714707	0.122178	0.289051	FALSE	-0.142706	16.7569	0
YGR182C	YGR182C	0.0270026	0.129732	0.300733	FALSE	-0.254866	3.96821	0.0114286
YGR183C	QCR9	0.00810704	0.640904	0.798235	FALSE	-0.00388492	0.771034	0.768691
YGR184C	UBR1	0.0565594	0.767886	0.878031	FALSE	0.122016	3.70618	0.0196622
YGR186W	TFG1	0.0669695	0.659415	0.811593	FALSE	-0.019839	0.958779	0.676242
YGR187C	HGH1	-0.0255494	0.844585	0.925572	FALSE
YGR189C	CRH1	-0.260551	2.49909e-07	2.78048e-06	FALSE
YGR191W	HIP1	0.00123203	0.986246	0.997542	FALSE
YGR192C	TDH3	-0.151368	1.94897e-26	9.33522e-25	TRUE
YGR194C	XKS1	-0.00206989	0.985696	0.997542	FALSE	0.0720875	0.939212	0.685612
YGR196C	FYV8	0.0758559	0.452598	0.653898	FALSE	0.01177	0.768249	0.769697
YGR197C	SNG1	-0.0807654	0.546497	0.732095	FALSE	0.130538	2.7814	0.090771
YGR198W	YPP1	0.223285	0.226672	0.42938	FALSE	0.0578376	2.34277	0.165372
YGR199W	PMT6	-0.0591037	0.573302	0.753215	FALSE	0.042838	0.657263	0.817452
YGR200C	ELP2	-0.0485214	0.669476	0.816194	FALSE	-0.149437	4.74827	0.0028777
YGR201C	YGR201C	-0.00386009	0.978216	0.995119	FALSE
YGR202C	PCT1	-0.255745	0.0397279	0.129345	FALSE
YGR204W	ADE3	-0.0985527	0.293496	0.500857	FALSE
YGR205W	TDA10	0.895531	8.53534e-07	8.93365e-06	FALSE
YGR206W	MVB12	0.1415	0.00823882	0.0371931	FALSE
YGR207C	CIR1	-0.12145	0.0409095	0.131825	FALSE
YGR208W	SER2	-0.266967	5.20966e-06	4.8912e-05	FALSE	-0.168128	23.8514	0
YGR209C	TRX2	0.0833457	1.40932e-07	1.61245e-06	FALSE	-0.0108414	1.49515	0.436522
YGR210C	YGR210C	-0.139474	0.0884481	0.231012	FALSE
YGR211W	ZPR1	0.277119	0.00154745	0.00888841	FALSE	0.183404	10.9681	0
YGR213C	RTA1	0.0870114	0.718067	0.848615	FALSE
YGR214W	RPS0A	-0.187212	0.419602	0.622465	FALSE	-0.0175925	2.23284	0.188453
YGR218W	CRM1	0.110602	0.191173	0.387556	FALSE	0.114202	2.6603	0.10621
YGR221C	TOS2	-0.124448	0.52051	0.71061	FALSE	0.0936662	1.22869	0.55625
YGR222W	PET54	-0.206434	0.00304091	0.0159141	FALSE
YGR223C	HSV2	-0.516692	0.0171049	0.0681783	FALSE
YGR227W	DIE2	0.000110498	0.999367	1	FALSE	0.213451	3.14766	0.0513709
YGR228W	YGR228W	0.294239	0.16974	0.357441	FALSE
YGR229C	SMI1	0.325422	0.121481	0.288736	FALSE	0.481084	35.3672	0
YGR230W	BNS1	-0.257009	0.0659186	0.187599	FALSE	-0.074623	1.89694	0.280754
YGR232W	NAS6	0.0570371	0.259263	0.467866	FALSE
YGR233C	PHO81	0.154769	0.0541965	0.162073	FALSE
YGR234W	YHB1	0.417862	6.04234e-21	1.87645e-19	FALSE	0.438166	109.121	0
YGR240C-A	YGR240C-A	-0.0663141	0.483885	0.683047	FALSE
YGR241C	YAP1802	-0.112497	0.520054	0.71061	FALSE	-0.0512165	3.19089	0.0487695
YGR245C	SDA1	-0.26594	0.250073	0.459534	FALSE	-0.0175004	0.803116	0.752795
YGR248W	SOL4	-0.799818	4.84887e-19	1.41267e-17	FALSE	-0.870798	117.894	0
YGR251W	NOP19	-0.151528	0.292492	0.50005	FALSE
YGR252W	GCN5	0.143565	0.0841083	0.22466	FALSE	-0.101606	2.81542	0.0851463
YGR256W	GND2	0.308042	0.0254227	0.091924	FALSE	0.0912077	3.13014	0.0530897
YGR257C	MTM1	0.182692	0.031656	0.109498	FALSE	0.00199599	0.926386	0.691513
YGR268C	HUA1	0.396163	0.00935214	0.041425	FALSE	0.0376169	0.369942	0.936237
YGR271C-A	EFG1	0.0837715	0.385462	0.591845	FALSE	0.0273782	2.24516	0.186521
YGR274C	TAF1	0.45756	0.0478373	0.148722	FALSE	0.122433	3.22453	0.0457467
YGR278W	CWC22	-0.351479	0.0500367	0.152886	FALSE	-0.249986	6.83876	0.000403226
YGR279C	SCW4	-0.4057	7.47509e-22	2.51483e-20	TRUE	-0.207259	46.3179	0
YGR280C	PXR1	0.181933	0.262662	0.469544	FALSE	0.141786	9.18596	0
YGR281W	YOR1	0.0516178	0.728585	0.857194	FALSE	-0.134057	2.58137	0.119434
YGR282C	BGL2	-0.143172	6.29889e-15	1.3799e-13	FALSE	-0.204918	190.055	0
YGR283C	YGR283C	0.0397823	0.642938	0.799048	FALSE
YGR284C	ERV29	0.0701373	0.202364	0.400196	FALSE
YGR285C	ZUO1	-0.00390264	0.915999	0.963025	FALSE	-0.0414299	5.58507	0.000403226
YGR286C	BIO2	0.794413	1.67172e-21	5.43021e-20	TRUE	0.210096	8.42525	0
YGR287C	IMA1	0.32823	0.149177	0.328949	FALSE	1.47916	158.381	0
YGR289C	MAL11	2.30788	1.24133e-23	4.80549e-22	FALSE	-0.499332	7.88467	0
YGR295C	COS6	-3.37962	2.11804e-47	1.76047e-45	FALSE	-1.54261	250.36	0
YHL001W	RPL14B	-0.0245645	0.306907	0.51313	FALSE	0.021017	2.44575	0.145515
YHL002W	HSE1	-0.378745	0.0340542	0.115116	FALSE
YHL004W	MRP4	-0.381436	0.00621041	0.0290844	FALSE	-0.401611	21.3833	0
YHL006C	SHU1	-0.079905	0.529037	0.717743	FALSE	-0.0773988	2.31345	0.171042
YHL007C	STE20	0.445994	6.56101e-05	0.000519367	FALSE	0.058402	1.63708	0.378504
YHL008C	YHL008C	-0.363052	0.00293413	0.0153838	TRUE
YHL009C	YAP3	-0.283575	0.0943761	0.242021	FALSE
YHL011C	PRS3	0.106333	0.184563	0.379326	FALSE	0.0353361	1.92605	0.272086
YHL012W	YHL012W	-0.525478	4.95609e-05	0.000402469	FALSE
YHL013C	OTU2	-0.100126	0.392212	0.596943	FALSE	-0.0651944	1.7482	0.335059
YHL016C	DUR3	-0.717302	0.00129325	0.00755107	FALSE	-0.598752	11.2224	0
YHL017W	YHL017W	0.0451237	0.623409	0.78812	FALSE	-0.0660633	0.692834	0.802941
YHL019C	APM2	-0.180417	0.315034	0.521244	FALSE
YHL020C	OPI1	0.182294	0.00153829	0.00887186	FALSE	0.175304	30.2406	0
YHL021C	AIM17	-0.0309124	0.733483	0.859736	FALSE	0.163392	1.18864	0.575849
YHL022C	SPO11	-0.926762	0.000627988	0.00399927	FALSE	-1.90986	48.1196	0
YHL023C	NPR3	0.103852	0.5832	0.761089	FALSE	-0.242318	6.27164	0.000403226
YHL024W	RIM4	-0.219674	0.263519	0.46967	FALSE	0.462973	3.39331	0.0339134
YHL028W	WSC4	0.310155	0.175959	0.36697	FALSE	-0.10487	2.53129	0.1286
YHL029C	OCA5	-0.440336	0.000175562	0.00127743	FALSE	-0.0039189	1.64096	0.377394
YHL030W	ECM29	-0.197826	0.406881	0.609679	FALSE	0.005941	2.58049	0.119531
YHL034C	SBP1	-0.068103	0.039436	0.128691	FALSE
YHL034W-A	YHL034W-A	-0.0769899	0.0872392	0.229551	FALSE
YHL035C	VMR1	-0.652732	2.85613e-05	0.000245332	FALSE	-0.107406	7.61507	0
YHL040C	ARN1	-0.0174283	0.870638	0.939234	FALSE	0.0276358	1.88786	0.284024
YHL044W	YHL044W	-2.45316	2.77361e-11	4.638e-10	FALSE	-0.905657	22.9718	0
YHR001W-A	QCR10	0.612309	6.16252e-153	1.24395e-150	TRUE
YHR002W	LEU5	7.7937e-08	1	1	FALSE	0.0693445	1.74649	0.335842
YHR004C	NEM1	0.160896	0.171399	0.360129	FALSE	0.4175	13.0103	0
YHR012W	VPS29	-0.0772974	0.240756	0.450412	FALSE	0.0754469	3.49519	0.0278002
YHR013C	ARD1	-0.0115903	0.825862	0.91511	FALSE	0.0652892	4.13364	0.00794872
YHR016C	YSC84	0.209422	0.0235542	0.0870121	FALSE	0.197698	12.5674	0
YHR018C	ARG4	0.0215637	0.602308	0.774396	FALSE	-0.051197	3.91806	0.0132104
YHR022C	YHR022C	-0.43858	0.0582741	0.170656	FALSE
YHR023W	MYO1	-0.271032	0.00224206	0.0122554	FALSE	-0.0851705	3.41532	0.0320764
YHR024C	MAS2	-0.147449	0.0874569	0.22991	FALSE	0.0386926	1.15187	0.587943
YHR025W	THR1	0.0240976	0.912598	0.963025	FALSE
YHR027C	RPN1	-0.192618	0.0276419	0.0987052	FALSE
YHR028C	DAP2	-0.247264	0.000716737	0.00448119	FALSE
YHR028W-A	YHR028W-A	-0.342717	0.0062179	0.0290844	FALSE
YHR029C	YHI9	-0.436003	7.53833e-07	7.97877e-06	FALSE
YHR030C	SLT2	-0.0274551	0.843898	0.925572	FALSE
YHR031C	RRM3	-0.234229	0.256819	0.465214	FALSE
YHR032C-A	YHR032C-A	0.623598	2.40302e-11	4.06642e-10	FALSE
YHR032W	ERC1	0.131336	0.46921	0.670867	FALSE
YHR032W-A	YHR032W-A	0.583068	4.3683e-11	7.13574e-10	FALSE	0.0107305	1.04439	0.638499
YHR033W	YHR033W	-0.840737	2.76344e-10	4.24428e-09	FALSE	-1.71105	122.678	0
YHR034C	PIH1	-0.301044	0.0290052	0.101824	FALSE	-0.0994927	1.92554	0.272237
YHR035W	NEL1	0.122415	0.461976	0.663723	FALSE	0.393866	6.046	0.000403226
YHR036W	BRL1	0.0468529	0.738608	0.862882	FALSE	0.0382785	1.53579	0.421539
YHR037W	PUT2	0.312565	0.000108088	0.000823331	FALSE	0.176019	9.32518	0
YHR038W	RRF1	-0.010571	0.838651	0.923627	FALSE
YHR039C	MSC7	-0.134769	0.00477337	0.0233787	FALSE
YHR039C-A	VMA10	-0.0513745	0.0953314	0.243586	FALSE	0.0336631	5.59751	0.000403226
YHR040W	BCD1	-0.106529	0.31231	0.519154	FALSE	0.052958	2.04867	0.233637
YHR041C	SRB2	0.0949333	0.156669	0.337717	FALSE
YHR043C	DOG2	-1.32585	1.43667e-38	9.22733e-37	FALSE	-0.88387	156.335	0
YHR044C	DOG1	-2.74084	1.07852e-07	1.24404e-06	FALSE	-1.49807	75.8642	0
YHR047C	AAP1	0.320904	0.137456	0.31206	FALSE	-0.0226854	1.16336	0.583277
YHR050W	SMF2	0.285531	0.00405923	0.0203755	FALSE	0.0474952	1.1976	0.572752
YHR052W	CIC1	0.730917	4.54086e-22	1.64519e-20	FALSE
YHR057C	CPR2	0.115732	0.166334	0.351841	FALSE	-0.0696971	5.54847	0.000653595
YHR058C	MED6	0.713227	0.000192363	0.0013883	FALSE
YHR059W	FYV4	0.127293	0.177868	0.369871	FALSE
YHR060W	VMA22	0.266651	0.000257964	0.00180447	FALSE	-0.0217505	0.889959	0.711592
YHR062C	RPP1	-0.179747	0.14787	0.326979	FALSE
YHR063C	PAN5	-0.177408	0.0877069	0.230139	FALSE	-0.036967	1.79844	0.315207
YHR063W-A	YHR063W-A	0.170061	0.00756645	0.0347123	FALSE
YHR064C	SSZ1	0.206688	0.000803786	0.00498136	FALSE	0.0938455	11.9721	0
YHR066W	SSF1	0.0265046	0.864451	0.937069	FALSE	-0.0433098	1.00994	0.654213
YHR072W	ERG7	0.162519	0.485979	0.684806	FALSE	0.0447676	1.99934	0.245733
YHR073C-B	YHR073C-B	0.510826	0.0203462	0.0775955	FALSE
YHR073W	OSH3	0.510826	0.0203462	0.0775955	FALSE	0.0323406	0.948425	0.680664
YHR074W	QNS1	0.104303	0.1598	0.342859	FALSE	0.00471719	0.105415	0.995301
YHR113W	APE4	0.105874	0.145741	0.323726	FALSE	0.558769	75.8324	0
YHR115C	DMA1	-0.351458	0.000446235	0.0029742	FALSE	-1.80829	137.222	0
YHR131C	YHR131C	-0.503905	0.0321524	0.1105	FALSE	0.151217	1.10045	0.611512
YHR135C	YCK1	0.0681258	0.450664	0.652781	FALSE	-0.00230436	1.21865	0.562738
YHR140W	YHR140W	-0.598453	2.25003e-05	0.000195048	FALSE	-0.317605	8.14488	0
YHR142W	CHS7	-0.0994042	0.208383	0.406412	FALSE	-0.0103242	1.40893	0.477811
YHR143W	DSE2	0.00581318	0.799316	0.901384	FALSE
YHR143W-A	RPC10	0.0433025	0.201051	0.398437	FALSE
YHR144C	DCD1	0.179442	0.00208468	0.011529	FALSE
YHR146W	CRP1	-0.0563182	0.527762	0.716701	FALSE
YHR147C	MRPL6	0.113908	0.012118	0.0510364	FALSE
YHR148W	IMP3	0.0109939	0.912548	0.963025	FALSE
YHR150W	PEX28	0.0261877	0.877781	0.943556	FALSE	-0.312431	9.11548	0
YHR151C	MTC6	0.00980795	0.946809	0.979028	FALSE	-0.0405903	1.90649	0.277411
YHR154W	RTT107	0.0710116	0.647385	0.802417	FALSE	-0.0949099	1.80196	0.314139
YHR155W	LAM1	-0.0495151	0.785257	0.890147	FALSE	-0.0367018	0.690199	0.80413
YHR156C	LIN1	-0.102654	0.650756	0.805183	FALSE	0.00109174	2.72365	0.0969887
YHR158C	KEL1	-0.253167	0.155349	0.336463	FALSE	-0.0407942	0.584189	0.850075
YHR162W	MPC2	-0.174664	1.39904e-29	7.75231e-28	FALSE	-0.0525004	13.142	0
YHR165C	PRP8	-0.471619	0.0122744	0.0513889	FALSE	-0.134716	3.52394	0.0259468
YHR168W	MTG2	-0.567449	0.0104844	0.0455129	FALSE	-0.144198	2.89245	0.0780843
YHR170W	NMD3	-0.172591	0.324845	0.531873	FALSE	0.0417429	1.70334	0.350958
YHR171W	ATG7	-0.251314	0.205744	0.40291	FALSE	-0.0045822	0.647843	0.822208
YHR175W	CTR2	0.237941	2.6848e-06	2.63446e-05	TRUE	0.00577585	1.18684	0.576101
YHR178W	STB5	0.0149655	0.922954	0.967944	FALSE
YHR179W	OYE2	-0.199656	0.0676433	0.190588	FALSE
YHR180W	YHR180W	0.0254031	0.905702	0.960211	FALSE
YHR184W	SSP1	0.0143324	0.943758	0.977662	FALSE	-0.281502	1.46297	0.452236
YHR197W	RIX1	0.232622	0.26015	0.467973	FALSE	-0.0639149	1.27542	0.533899
YHR205W	SCH9	-0.899369	3.86633e-12	6.87186e-11	FALSE	-0.0443311	1.43689	0.464274
YHR208W	BAT1	-0.042557	0.526039	0.715049	FALSE
YHR209W	CRG1	-0.119628	0.424819	0.626912	FALSE	0.0418323	1.92715	0.271755
YHR216W	IMD2	-0.877058	8.30389e-10	1.23509e-08	FALSE	-0.588284	42.5415	0
YIL003W	CFD1	-0.798508	0.00056959	0.00369189	FALSE	-0.4892	36.2861	0
YIL009C-A	EST3	0.133741	0.113895	0.276281	FALSE
YIL009W	FAA3	-0.00822158	0.925821	0.968895	FALSE
YIL010W	DOT5	-0.133325	0.0424098	0.135424	FALSE	0.0385597	1.84319	0.300775
YIL013C	PDR11	-0.088764	0.677365	0.821559	FALSE	0.119629	0.510134	0.881708
YIL027C	EMC5	-0.427833	0.000103484	0.000794689	FALSE	-0.0237346	1.68769	0.357825
YIL034C	CAP2	-0.0839654	0.478097	0.676823	FALSE	-0.0188667	1.27087	0.536048
YIL038C	NOT3	-0.0442031	0.676458	0.820811	FALSE
YIL039W	TED1	0.175174	0.247722	0.457557	FALSE
YIL040W	APQ12	0.292293	2.53559e-21	8.05121e-20	FALSE
YIL041W	GVP36	-0.084687	0.0565995	0.166963	FALSE
YIL042C	PKP1	-0.151344	0.252125	0.46018	FALSE
YIL043C	CBR1	-0.15096	5.36336e-06	4.98581e-05	FALSE
YIL044C	AGE2	0.0122052	0.935274	0.97208	FALSE
YIL045W	PIG2	0.220003	0.134835	0.308538	FALSE
YIL046W	MET30	0.0287853	0.746176	0.866795	FALSE	0.157788	12.2138	0
YIL049W	DFG10	-0.214372	0.0568001	0.16738	FALSE	-0.211135	5.61212	0.000403226
YIL050W	PCL7	0.0534829	0.50243	0.697381	FALSE	0.102802	5.3003	0.000653595
YIL051C	MMF1	-0.105232	0.000940886	0.00575529	FALSE	0.0372765	5.57151	0.000403226
YIL053W	GPP1	0.10846	0.0536158	0.160783	FALSE	0.00835205	1.65537	0.371764
YIL055C	YIL055C	0.318454	0.125403	0.294824	FALSE
YIL056W	VHR1	0.271085	0.0403149	0.130654	FALSE
YIL059C	YIL059C	-1.69837	5.23991e-15	1.15687e-13	FALSE
YIL060W	YIL060W	-1.69837	5.23991e-15	1.15687e-13	FALSE
YIL061C	SNP1	0.482852	0.0408727	0.131825	FALSE
YIL062C	ARC15	-0.472268	2.73763e-08	3.3204e-07	FALSE
YIL063C	YRB2	-0.0801854	0.203136	0.400881	FALSE
YIL064W	EFM4	0.140696	0.0601624	0.174737	FALSE
YIL068C	SEC6	-0.633249	0.000790378	0.00490903	FALSE	-0.0654428	2.54245	0.125594
YIL068W-A	YIL068W-A	-0.633249	0.000790378	0.00490903	FALSE
YIL078W	THS1	-0.115845	0.010553	0.0456007	FALSE	-0.0174414	1.37279	0.493938
YIL079C	AIR1	0.163705	0.419292	0.622331	FALSE	-0.0194325	0.432007	0.914563
YIL084C	SDS3	0.173327	0.349011	0.55504	FALSE	-0.0965075	2.18316	0.20055
YIL085C	KTR7	0.418343	0.00700456	0.0325039	FALSE	-0.000167918	2.15955	0.206665
YIL086C	YIL086C	0.710163	1.76058e-08	2.1918e-07	FALSE
YIL087C	AIM19	0.419261	1.33546e-05	0.000119431	FALSE
YIL088C	AVT7	-0.0474977	0.509922	0.704665	FALSE
YIL090W	ICE2	-0.34523	6.97761e-05	0.000549268	FALSE
YIL091C	UTP25	-0.0909546	0.479725	0.67853	FALSE	0.0393923	1.20557	0.569186
YIL092W	YIL092W	0.0751863	0.597051	0.770409	FALSE	-0.0615886	0.827102	0.744654
YIL098C	FMC1	0.0774739	0.376591	0.584109	FALSE	0.200435	6.68286	0.000403226
YIL099W	SGA1	0.037753	0.690271	0.829026	FALSE
YIL102C-A	YIL102C-A	-0.110935	0.454306	0.655369	FALSE	0.276799	4.6339	0.0039886
YIL111W	COX5B	-0.360851	1.03927e-16	2.62231e-15	FALSE	-0.59763	204.915	0
YIL112W	HOS4	-0.163223	0.137589	0.31206	FALSE	0.0602488	1.58624	0.398987
YIL115C	NUP159	-0.344341	0.118552	0.284403	FALSE	0.0467387	1.38659	0.487808
YIL119C	RPI1	-0.707526	1.05008e-18	2.96754e-17	FALSE	-0.946418	92.372	0
YIL120W	QDR1	0.100778	0.375537	0.582794	FALSE	0.156871	4.46836	0.00497925
YIL121W	QDR2	-0.108136	0.225489	0.42819	FALSE
YIL122W	POG1	-0.147804	0.540368	0.726835	FALSE
YIL123W	SIM1	-0.323382	5.30902e-08	6.30391e-07	FALSE
YIL124W	AYR1	-0.126727	0.000628335	0.00399927	FALSE	-0.0969685	8.91935	0
YIL126W	STH1	0.0578674	0.524609	0.713791	FALSE	0.00666278	0.782827	0.7629
YIL127C	RRT14	0.0888412	0.339991	0.546617	FALSE	0.258449	21.7157	0
YIL128W	MET18	0.0529724	0.597298	0.770409	FALSE	0.0680785	2.79522	0.088184
YIL129C	TAO3	-0.199549	0.252099	0.46018	FALSE	-0.0255896	1.96582	0.256115
YIL133C	RPL16A	-0.227651	3.23609e-25	1.38564e-23	FALSE	0.0506542	18.1371	0
YIL134W	FLX1	-0.193758	0.0206719	0.0784146	FALSE
YIL136W	OM45	-0.24121	0.0150553	0.0614831	FALSE
YIL139C	REV7	-0.147273	0.213073	0.413276	FALSE	-0.0169145	0.266826	0.966597
YIL142W	CCT2	0.126939	0.0594466	0.173192	FALSE
YIL144W	NDC80	0.290157	0.165968	0.351593	FALSE	-0.0634896	1.10545	0.609418
YIL145C	PAN6	-0.0178517	0.875791	0.94261	FALSE
YIL147C	SLN1	-0.0113078	0.915758	0.963025	FALSE
YIL148W	RPL40A	0.135047	1.79256e-60	1.94838e-58	TRUE	-0.0161278	3.05751	0.0613312
YIL149C	MLP2	-0.0645138	0.617841	0.784727	FALSE	-0.0762313	2.86499	0.0805798
YIL151C	ESL1	-0.20661	0.250263	0.459534	FALSE	0.0585903	0.569485	0.855374
YIL152W	YIL152W	0.035938	0.759923	0.874118	FALSE	0.0165879	0.154082	0.991456
YIL154C	IMP2'	-0.265437	0.0255744	0.0923031	FALSE
YIL155C	GUT2	-0.00143184	0.990554	0.999723	FALSE
YIL156W	UBP7	-0.0067997	0.955367	0.983663	FALSE
YIL156W-A	YIL156W-A	0.109692	0.00339154	0.0173947	FALSE
YIL156W-B	YIL156W-B	0.0833763	0.0112169	0.0478115	FALSE
YIL157C	COA1	0.127477	0.0152187	0.0619685	FALSE
YIL158W	AIM20	0.323332	5.32762e-09	7.20376e-08	FALSE
YIL160C	POT1	0.305382	0.220144	0.42301	FALSE	0.719135	6.16951	0.000403226
YIL161W	YIL161W	0.25155	0.0485727	0.150347	FALSE	0.278696	11.4765	0
YIL162W	SUC2	-0.270258	0.141068	0.317092	FALSE
YIL165C	YIL165C	-0.27011	0.0191798	0.0744085	FALSE
YIR003W	AIM21	-0.283498	0.0317308	0.109535	FALSE	0.229404	8.32923	0
YIR007W	EGH1	-0.276255	0.101514	0.255912	FALSE	-0.215064	3.93395	0.0121187
YIR008C	PRI1	-0.252098	0.153378	0.333933	FALSE	-0.385774	12.3391	0
YIR016W	YIR016W	-0.382588	5.06003e-09	6.89065e-08	FALSE	0.113822	2.68229	0.102881
YIR021W	MRS1	-0.283774	0.0915753	0.23786	FALSE
YIR022W	SEC11	0.0330387	0.504196	0.698802	FALSE	0.0551446	3.60364	0.0234215
YIR023C-A	YIR023C-A	0.158224	0.501263	0.697187	FALSE
YIR023W	DAL81	0.2601	0.230199	0.435438	FALSE	0.10394	1.90059	0.279426
YIR024C	INA22	-0.0444747	0.777496	0.885175	FALSE	0.0246968	0.349508	0.941519
YIR025W	MND2	0.210718	0.140078	0.316434	FALSE	0.286777	7.02327	0.000403226
YIR026C	YVH1	0.280596	0.0258233	0.0930823	FALSE	0.293517	26.1951	0
YIR029W	DAL2	-0.0262748	0.87148	0.939643	FALSE	0.0675559	0.630957	0.82996
YIR030C	DCG1	-0.223993	0.224629	0.427002	FALSE	0.0142673	0.132635	0.993497
YIR030W-A	YIR030W-A	-0.288681	0.0141611	0.0584225	FALSE
YIR031C	DAL7	-0.294594	0.012186	0.0511702	FALSE
YIR032C	DAL3	0.0251608	0.636099	0.795757	FALSE	0.231257	16.6056	0
YIR033W	MGA2	0.0549132	0.652188	0.805895	FALSE	-0.281496	17.8109	0
YIR034C	LYS1	-0.119072	0.00741973	0.0341501	FALSE
YIR035C	YIR035C	0.0890113	0.159311	0.34239	FALSE
YIR036C	IRC24	-0.0275749	0.687496	0.827103	FALSE
YIR037W	HYR1	-0.0804017	0.0182777	0.0715411	FALSE	-0.000283787	0.957713	0.676675
YIR038C	GTT1	0.0715118	0.570123	0.751212	FALSE	0.0429497	2.76489	0.0917887
YIR039C	YPS6	-0.838329	7.42166e-05	0.000580986	FALSE	-1.49488	62.7789	0
YJL001W	PRE3	-0.0200535	0.586257	0.761607	TRUE	0.000419296	0.521502	0.877713
YJL002C	OST1	-0.0906557	0.0284898	0.10064	FALSE	-0.0867225	7.73538	0
YJL004C	SYS1	0.0234998	0.660128	0.811593	FALSE	-0.0666311	1.09176	0.615459
YJL005W	CYR1	0.214862	0.0225853	0.0839818	FALSE
YJL006C	CTK2	0.0540672	0.738816	0.862882	FALSE	-0.0968281	1.89018	0.283239
YJL008C	CCT8	-0.0819035	0.142762	0.31893	FALSE	-0.089019	8.41149	0
YJL009W	YJL009W	-0.121221	0.0288507	0.101524	FALSE
YJL010C	NOP9	-0.286759	0.0317829	0.109535	FALSE	-0.0134557	1.32115	0.514945
YJL013C	MAD3	0.406829	0.00935212	0.041425	FALSE	0.539492	26.4038	0
YJL014W	CCT3	-0.255337	0.000699044	0.00439	FALSE	-0.185559	20.7715	0
YJL016W	TPH3	-0.312375	0.193544	0.390015	FALSE	0.0108258	0.661737	0.815218
YJL020C	BBC1	-0.04107	0.557938	0.742341	FALSE	0.799408	413.773	0
YJL024C	APS3	0.110575	0.244127	0.454646	FALSE
YJL026W	RNR2	-0.108454	0.00146591	0.00847172	FALSE
YJL029C	VPS53	0.293988	0.0270655	0.097188	FALSE
YJL030W	MAD2	0.11113	0.186964	0.38235	FALSE
YJL031C	BET4	-0.24385	0.017851	0.0704565	FALSE	-0.360177	27.1645	0
YJL032W	YJL032W	-0.119801	0.262615	0.469544	FALSE
YJL033W	HCA4	0.0525243	0.688571	0.827691	FALSE	-0.100317	2.24836	0.186396
YJL034W	KAR2	0.000532237	0.986956	0.997772	FALSE	0.024199	2.92228	0.0755692
YJL035C	TAD2	0.697298	1.35454e-14	2.85667e-13	FALSE	1.13635	284.003	0
YJL039C	NUP192	0.0926203	0.615025	0.783083	FALSE	-0.116426	1.52183	0.42925
YJL042W	MHP1	0.0333514	0.807092	0.905505	FALSE	-0.0944661	2.63617	0.110303
YJL044C	GYP6	-0.0515903	0.523528	0.713352	FALSE
YJL045W	YJL045W	0.0487902	0.825216	0.914893	FALSE
YJL046W	AIM22	0.169539	0.295936	0.502896	FALSE
YJL049W	CHM7	-0.0539953	0.80925	0.906797	FALSE	-0.0998162	1.76335	0.329659
YJL050W	MTR4	-0.0197237	0.924102	0.967944	FALSE	-0.0241122	2.25793	0.185048
YJL051W	IRC8	0.271505	0.025071	0.0913025	FALSE
YJL052W	TDH1	-0.293918	5.12349e-07	5.52633e-06	FALSE
YJL053W	PEP8	-0.0793809	0.498593	0.696502	FALSE
YJL054W	TIM54	0.293347	0.140831	0.317092	FALSE	0.182317	7.27287	0.000403226
YJL056C	ZAP1	0.0168232	0.902949	0.960027	FALSE	-0.105209	4.54611	0.00475524
YJL057C	IKS1	0.173961	0.147846	0.326979	FALSE	0.135871	3.26236	0.0439605
YJL058C	BIT61	-0.0170179	0.927928	0.969674	FALSE
YJL059W	YHC3	-0.151073	0.184369	0.379261	FALSE
YJL060W	BNA3	-0.347805	1.56573e-08	1.9842e-07	FALSE	-0.556409	218.114	0
YJL064W	YJL064W	-0.190898	0.0956348	0.243701	FALSE
YJL065C	DLS1	-0.190898	0.0956348	0.243701	FALSE	-0.0478648	2.87334	0.0798698
YJL071W	ARG2	-0.0833816	0.683178	0.824211	FALSE	0.00741021	0.63001	0.830449
YJL075C	APQ13	0.164786	0.200691	0.398003	FALSE
YJL076W	NET1	0.0151837	0.884631	0.948045	FALSE	-0.010931	1.39628	0.483047
YJL078C	PRY3	0.0551044	0.365082	0.571591	FALSE	0.280974	3.35237	0.0373586
YJL080C	SCP160	-0.250404	0.193993	0.390027	FALSE	-0.0917389	3.42048	0.031662
YJL090C	DPB11	0.0487902	0.825216	0.914893	FALSE	0.0519771	1.34245	0.507006
YJL097W	PHS1	-0.122782	0.314036	0.520202	FALSE	-0.028872	1.26406	0.540099
YJL099W	CHS6	0.106972	0.541	0.727339	FALSE	0.0594357	2.97984	0.0713143
YJL104W	PAM16	-0.225381	1.97376e-05	0.000173765	FALSE	-0.0940155	7.59384	0
YJL105W	SET4	0.126294	0.347734	0.553943	FALSE
YJL108C	PRM10	0.379	0.0369486	0.122843	FALSE	0.472289	10.2717	0
YJL110C	GZF3	0.384954	0.116218	0.279993	FALSE	0.0103277	0.990796	0.662036
YJL111W	CCT7	0.0199341	0.862722	0.936272	FALSE	-0.00456132	0.585157	0.849772
YJL112W	MDV1	-0.203521	0.279479	0.486664	FALSE	-0.0898012	1.31927	0.515703
YJL115W	ASF1	-0.0533452	0.632141	0.794318	FALSE
YJL117W	PHO86	-0.0448021	0.425282	0.627269	FALSE
YJL121C	RPE1	0.124495	0.0106722	0.0460453	FALSE
YJL122W	ALB1	0.106119	0.112931	0.275124	FALSE
YJL123C	MTC1	0.121511	0.298429	0.504494	FALSE
YJL124C	LSM1	-0.0265973	0.606067	0.777022	FALSE
YJL125C	GCD14	0.253133	0.019087	0.0742973	FALSE	0.175663	7.1543	0.000403226
YJL126W	NIT2	0.0381917	0.714431	0.846533	FALSE	-0.0408284	1.4731	0.447523
YJL128C	PBS2	0.145142	0.276767	0.483701	FALSE
YJL129C	TRK1	-0.115917	0.247934	0.45765	FALSE
YJL130C	URA2	-0.156811	0.00186224	0.0104418	FALSE
YJL131C	AIM23	0.267593	0.103668	0.258805	FALSE
YJL132W	YJL132W	-0.0312669	0.844675	0.925572	FALSE
YJL133C-A	YJL133C-A	-0.0125786	0.752939	0.869497	FALSE	0.10662	39.7286	0
YJL133W	MRS3	0.0257331	0.777623	0.885175	FALSE
YJL138C	TIF2	-2.41429	1.69868e-14	3.52975e-13	FALSE	0.00935315	3.6018	0.0234695
YJL139C	YUR1	-0.237954	2.17164e-06	2.17626e-05	FALSE	0.172562	4.21059	0.00763158
YJL140W	RPB4	-0.297106	1.7187e-08	2.14914e-07	FALSE	-0.12665	15.2677	0
YJL141C	YAK1	0.1863	0.0826042	0.221439	FALSE	0.0161511	1.06178	0.631236
YJL142C	IRC9	0.231676	0.0341776	0.11512	FALSE	-0.00127216	0.405621	0.924001
YJL147C	MRX5	-0.392259	0.00786001	0.0358264	FALSE
YJL148W	RPA34	-0.116282	0.240484	0.45037	FALSE
YJL149W	DAS1	-0.244322	0.252611	0.46018	FALSE
YJL151C	SNA3	0.1002	0.00498428	0.024322	FALSE
YJL152W	YJL152W	0.0999583	0.0050272	0.0244524	FALSE
YJL153C	INO1	-0.0365735	0.863186	0.936416	FALSE
YJL154C	VPS35	-0.190646	0.0817132	0.220431	FALSE	-0.192403	7.87394	0
YJL155C	FBP26	-0.202475	0.119184	0.285392	FALSE	-0.0619351	0.911587	0.698375
YJL158C	CIS3	-0.342782	0.000586189	0.00378212	FALSE
YJL159W	HSP150	-0.184455	7.8122e-23	2.94364e-21	FALSE
YJL160C	PIR5	-0.949081	2.36358e-08	2.90412e-07	FALSE	-0.337713	5.43369	0.000653595
YJL161W	FMP33	-1.07198	5.66642e-17	1.45575e-15	FALSE	-0.734871	47.5646	0
YJL162C	JJJ2	0.243622	0.325952	0.533375	FALSE	-0.371371	11.9406	0
YJL163C	YJL163C	0.443515	0.0128739	0.053424	FALSE	0.31887	9.03883	0
YJL164C	TPK1	-0.208456	0.00955996	0.0422132	FALSE
YJL165C	HAL5	-0.125035	0.121302	0.288736	FALSE	-0.0279751	1.39679	0.482798
YJL166W	QCR8	-0.0159793	0.283697	0.491556	FALSE	-0.0558758	2.91242	0.0761226
YJL167W	ERG20	-0.0212028	0.66484	0.811593	FALSE	0.128401	37.0398	0
YJL168C	SET2	-0.0274235	0.859466	0.934692	FALSE	0.0246619	0.736449	0.781407
YJL169W	YJL169W	-0.076373	0.662296	0.811593	FALSE
YJL171C	TOH1	0.18638	4.36686e-05	0.000362882	FALSE
YJL173C	RFA3	0.10167	0.0107396	0.0461246	FALSE
YJL174W	KRE9	0.0175156	0.745403	0.866795	FALSE
YJL176C	SWI3	0.0451161	0.752171	0.869025	FALSE
YJL177W	RPL17B	-0.200153	1.73262e-12	3.15896e-11	FALSE
YJL178C	ATG27	0.0279336	0.421012	0.624157	FALSE
YJL179W	PFD1	-0.0782478	0.0124675	0.0519662	FALSE
YJL180C	ATP12	-0.246759	0.0222302	0.0832088	FALSE
YJL181W	RBH1	-0.213346	0.0637775	0.18298	FALSE
YJL183W	MNN11	0.156485	0.0198735	0.0763079	FALSE
YJL184W	GON7	-0.0201681	0.795785	0.898717	FALSE
YJL185C	ATG36	0.212084	0.0702943	0.196685	FALSE
YJL186W	MNN5	0.0849747	0.291571	0.49922	FALSE
YJL187C	SWE1	-0.29171	0.0463744	0.145087	FALSE	-0.197205	2.41689	0.150145
YJL190C	RPS22A	-0.170551	1.15723e-168	2.51563e-166	FALSE	-0.0326971	7.54169	0.000403226
YJL191W	RPS14B	-0.234481	5.273e-21	1.65572e-19	FALSE	-0.000768074	0.718984	0.790539
YJL196C	ELO1	-0.0726691	0.0497389	0.152454	FALSE	-0.0476073	4.27101	0.00737292
YJL197W	UBP12	-0.162643	0.449326	0.651512	FALSE
YJL198W	PHO90	-0.183256	0.106852	0.265347	FALSE
YJL199C	MBB1	0.20252	0.0491651	0.151351	FALSE
YJL200C	ACO2	-0.0975901	0.297658	0.504002	FALSE	-0.0761675	5.79309	0.000403226
YJL201W	ECM25	-0.197696	0.279496	0.486664	FALSE	-0.0678326	1.60863	0.388497
YJL202C	YJL202C	0.029832	0.868939	0.939033	FALSE
YJL203W	PRP21	0.0620837	0.729332	0.85736	FALSE	-0.091797	2.72442	0.0967945
YJL205C	NCE101	-0.150943	0.021173	0.0798863	FALSE	0.119107	1.79941	0.314941
YJL207C	LAA1	0.124341	0.424117	0.626204	FALSE	0.0144918	1.04978	0.636458
YJL208C	NUC1	-0.142673	0.231425	0.43717	FALSE	-0.10661	2.17897	0.201892
YJL209W	CBP1	0.0881618	0.63937	0.797379	FALSE	0.112298	2.07096	0.228139
YJL210W	PEX2	0.0353756	0.661138	0.811593	FALSE
YJL212C	OPT1	0.509843	7.3495e-09	9.70546e-08	FALSE	0.72074	74.1968	0
YJL213W	YJL213W	-0.135104	0.559389	0.743572	FALSE	1.55515	217.611	0
YJR001W	AVT1	-0.0159398	0.82792	0.916452	FALSE
YJR002W	MPP10	-0.10481	0.256399	0.465214	FALSE	-0.00868867	0.714313	0.793113
YJR003C	MRX12	-0.0197241	0.877007	0.943083	FALSE	-0.125476	4.74793	0.0028777
YJR005W	APL1	0.182322	0.317981	0.524278	FALSE
YJR006W	POL31	-0.0895822	0.391479	0.596399	FALSE	0.00747767	2.0303	0.237352
YJR007W	SUI2	-0.0744504	0.321885	0.528864	FALSE	-0.0488668	3.25355	0.0442636
YJR008W	MHO1	-0.0240852	0.829681	0.916628	FALSE	-0.113273	1.90773	0.276989
YJR010W	MET3	0.220538	1.08942e-08	1.4058e-07	FALSE	0.117066	29.3546	0
YJR012C	YJR012C	0.154819	0.0952642	0.243586	FALSE	-0.00553744	0.5244	0.876594
YJR013W	GPI14	0.0776996	0.470613	0.671354	FALSE
YJR014W	TMA22	0.165198	0.0180154	0.0710062	FALSE
YJR015W	YJR015W	-1.30037	2.60442e-35	1.56598e-33	FALSE
YJR016C	ILV3	-0.0376709	0.330692	0.538947	FALSE
YJR017C	ESS1	-0.0454285	0.380996	0.587928	FALSE	-0.0477917	1.72423	0.344095
YJR021C	REC107	-0.149313	0.25098	0.459669	FALSE	-0.145492	2.70718	0.0993529
YJR024C	MDE1	0.0188909	0.887216	0.94977	FALSE	0.132531	4.32645	0.00694259
YJR025C	BNA1	-0.26332	2.01979e-07	2.27408e-06	FALSE	-0.412422	110.7	0
YJR031C	GEA1	-0.0852432	0.616881	0.784213	FALSE	0.0514018	1.71553	0.347099
YJR032W	CPR7	0.143101	0.232397	0.438227	FALSE	0.180654	6.76091	0.000403226
YJR033C	RAV1	-0.0779288	0.466944	0.668482	FALSE	-0.238185	4.59646	0.00406412
YJR035W	RAD26	0.472544	0.00898117	0.0399069	FALSE	0.294078	7.88668	0
YJR036C	HUL4	0.211309	0.359689	0.565655	FALSE	-0.0117571	0.118761	0.994827
YJR041C	URB2	-0.299016	0.0545468	0.162948	FALSE	0.0962064	2.19743	0.196723
YJR042W	NUP85	0.129175	0.135216	0.308909	FALSE
YJR043C	POL32	0.28758	0.0207039	0.0784304	FALSE
YJR044C	VPS55	0.0412167	0.274934	0.481688	FALSE
YJR045C	SSC1	0.0439932	0.207631	0.405224	FALSE
YJR046W	TAH11	0.0239261	0.903295	0.960027	FALSE
YJR048W	CYC1	-0.245543	2.43991e-25	1.09447e-23	TRUE	0.0336129	1.60874	0.388448
YJR049C	UTR1	0.00244621	0.984905	0.997542	FALSE	0.00106275	0.535252	0.872252
YJR054W	KCH1	-0.0401087	0.802452	0.904559	FALSE	0.169948	3.99253	0.0109333
YJR056C	YJR056C	-0.334371	0.155902	0.336835	FALSE
YJR057W	CDC8	0.0119049	0.884509	0.948045	FALSE	-0.0892794	2.52182	0.130968
YJR058C	APS2	-0.017622	0.815497	0.90914	FALSE	0.00826173	0.880585	0.714942
YJR059W	PTK2	-0.0570883	0.458733	0.660672	FALSE
YJR062C	NTA1	0.117776	0.71196	0.845022	FALSE	0.0290995	0.571519	0.854525
YJR065C	ARP3	0.176172	0.00042657	0.00287706	FALSE
YJR068W	RFC2	-0.0486591	0.611814	0.781262	FALSE	-0.0527009	2.04578	0.233794
YJR069C	HAM1	-0.106232	0.0887577	0.231606	FALSE
YJR070C	LIA1	-0.0751096	0.40824	0.611062	FALSE
YJR071W	YJR071W	-0.455476	0.0692483	0.194233	FALSE
YJR072C	NPA3	-0.00217757	0.985893	0.997542	FALSE
YJR073C	OPI3	-0.16788	1.0689e-23	4.19544e-22	FALSE
YJR074W	MOG1	-0.0873727	0.0123018	0.0514275	FALSE
YJR076C	CDC11	0.0275878	0.815025	0.90914	FALSE
YJR077C	MIR1	-0.160544	0.153627	0.334219	FALSE	0.0469523	1.18119	0.576894
YJR078W	BNA2	0.33759	0.0618647	0.179129	FALSE	0.398747	6.16268	0.000403226
YJR079W	YJR079W	0.132093	0.491043	0.690014	FALSE	0.380386	5.69121	0.000403226
YJR080C	AIM24	0.0156876	0.859528	0.934692	FALSE	-0.0986555	2.69416	0.100946
YJR082C	EAF6	-0.461435	4.16373e-13	7.95048e-12	FALSE	0.0252093	2.21617	0.191759
YJR083C	ACF4	0.255869	0.18253	0.377621	FALSE
YJR084W	YJR084W	-0.0166428	0.908619	0.962063	FALSE	-0.0892074	2.09333	0.222497
YJR087W	YJR087W	-0.189867	0.0673701	0.190038	FALSE
YJR088C	EMC2	-0.212287	0.0377524	0.124928	FALSE	-0.0686316	2.35258	0.163299
YJR089W	BIR1	-0.132208	0.552757	0.737531	FALSE	0.120737	3.41458	0.0321399
YJR090C	GRR1	0.122143	0.486741	0.684806	FALSE	-0.0327608	0.879576	0.715379
YJR091C	JSN1	-0.0861917	0.521876	0.711786	FALSE	-0.119202	1.94299	0.26516
YJR092W	BUD4	0.139013	0.222553	0.424955	FALSE
YJR093C	FIP1	0.333229	0.025156	0.0914941	FALSE
YJR095W	SFC1	0.693147	0.00465827	0.0230145	FALSE	1.0785	110.315	0
YJR097W	JJJ3	-0.0717945	0.721301	0.851105	FALSE	0.0395965	1.00787	0.655341
YJR103W	URA8	0.0642819	1.02436e-07	1.18641e-06	TRUE	0.051189	2.85607	0.0811763
YJR104C	SOD1	0.0882451	1.21341e-12	2.2607e-11	TRUE	-0.0363184	14.7428	0
YJR105W	ADO1	-0.104973	9.75916e-08	1.13495e-06	FALSE	-0.0377579	5.46562	0.000653595
YJR107W	LIH1	0.298689	0.00199469	0.0111403	FALSE	0.195393	2.25735	0.185142
YJR109C	CPA2	-0.233894	0.00609139	0.0286904	FALSE
YJR112W	NNF1	0.2948	0.186704	0.38235	FALSE	0.024543	0.460371	0.90312
YJR116W	TDA4	0.143101	0.548235	0.732881	FALSE	-0.00602683	0.808468	0.750988
YJR119C	JHD2	0.19638	0.318939	0.525551	FALSE	-0.0145276	0.193045	0.985621
YJR121W	ATP2	-0.0192434	0.348665	0.554801	FALSE	-0.0219422	1.18127	0.576882
YJR122W	IBA57	0.258861	0.197071	0.393585	FALSE	0.15075	2.24431	0.186554
YJR123W	RPS5	-0.134029	5.70566e-51	5.37473e-49	TRUE	0.00113226	1.32126	0.514904
YJR124C	YJR124C	0.0139862	0.933356	0.97139	FALSE	0.0157801	0.56723	0.856632
YJR127C	RSF2	-0.432102	0.00256338	0.013694	FALSE	-0.516422	29.1096	0
YJR133W	XPT1	-0.0138699	0.844496	0.925572	FALSE	-0.00364207	0.457667	0.904099
YJR134C	SGM1	-0.423083	0.0262074	0.0943468	FALSE	-0.0304112	0.668556	0.81223
YJR135W-A	TIM8	-0.0849058	0.304033	0.510515	FALSE	-0.0999512	2.47889	0.138922
YJR136C	TTI2	-0.0849058	0.304033	0.510515	FALSE	-0.0480944	1.64842	0.374848
YJR143C	PMT4	-0.117783	0.15947	0.342448	FALSE
YJR144W	MGM101	-0.0759854	0.735783	0.86136	FALSE
YJR147W	HMS2	-0.152775	0.291132	0.498933	FALSE	0.197173	1.62984	0.380461
YJR152W	DAL5	-0.427333	0.0625338	0.180696	FALSE	0.158581	2.58102	0.119473
YKL002W	DID4	0.082938	0.203729	0.401466	FALSE	0.0346535	1.69082	0.356247
YKL006W	RPL14A	-0.895646	0	0	FALSE
YKL007W	CAP1	-0.117272	0.0606005	0.175828	FALSE	-0.0129567	1.24062	0.550954
YKL008C	LAC1	-0.230011	0.000224258	0.00158439	FALSE
YKL010C	UFD4	0.385705	0.000111307	0.000845576	FALSE	0.0782789	2.02764	0.238307
YKL011C	CCE1	0.0339311	0.738148	0.862882	FALSE	-0.119685	3.79135	0.0176182
YKL012W	PRP40	-0.0734602	0.524488	0.713791	FALSE	-0.00524985	0.462786	0.902125
YKL013C	ARC19	0.0111007	0.807073	0.905505	FALSE	0.0294116	1.7158	0.347005
YKL014C	URB1	-0.13186	0.300123	0.506055	FALSE	-0.15226	5.46125	0.000653595
YKL015W	PUT3	0.268921	0.141005	0.317092	FALSE	0.147635	4.41901	0.00550039
YKL016C	ATP7	-0.0788857	0.0011224	0.00672014	FALSE	-0.0286253	1.26319	0.540632
YKL017C	HCS1	-0.500252	0.0116699	0.0495184	FALSE	-0.449608	14.288	0
YKL018C-A	YKL018C-A	0.142661	0.0158069	0.0639976	FALSE
YKL018W	SWD2	0.143549	0.211065	0.41051	FALSE
YKL019W	RAM2	0.316219	2.20901e-05	0.000192082	FALSE
YKL020C	SPT23	0.273998	0.0194417	0.0749555	FALSE
YKL021C	MAK11	-0.0203927	0.819236	0.910405	FALSE
YKL022C	CDC16	-0.493391	0.00223142	0.0122209	FALSE	-0.0898457	3.24606	0.0445731
YKL023W	YKL023W	-0.135903	0.262776	0.469544	FALSE	-0.0969025	2.95819	0.0739243
YKL024C	URA6	-0.00909732	0.859626	0.934692	FALSE	0.0234624	0.743329	0.77849
YKL025C	PAN3	0.194623	0.350246	0.556377	FALSE	0.0129592	1.28868	0.529378
YKL026C	GPX1	0.0736272	0.580092	0.758446	FALSE	0.167492	2.69949	0.0999302
YKL027W	TCD2	0.229763	0.0204636	0.0779384	FALSE	0.292312	24.0861	0
YKL028W	TFA1	-0.0582472	0.60655	0.777022	FALSE	0.0590069	1.36407	0.497469
YKL029C	MAE1	-0.0442138	0.749491	0.867352	FALSE
YKL030W	YKL030W	-0.0891276	0.534459	0.723281	FALSE
YKL034W	TUL1	0.218333	0.0776819	0.213135	FALSE	0.0301313	0.740368	0.77941
YKL040C	NFU1	-0.216493	0.00888195	0.0396531	FALSE	0.253303	13.1642	0
YKL041W	VPS24	-0.218929	0.00768928	0.0351616	FALSE	-0.129268	5.99937	0.000403226
YKL045W	PRI2	-0.171619	0.214803	0.415754	FALSE	-0.0682289	1.28712	0.5298
YKL065C	YET1	0.100081	0.000120499	0.000910511	FALSE
YKL065W-A	YKL065W-A	0.244405	0.0323951	0.110968	FALSE
YKL066W	YKL066W	-0.28721	9.24481e-26	4.28292e-24	TRUE
YKL067W	YNK1	-0.335258	1.51428e-30	8.73339e-29	TRUE
YKL068W	NUP100	-0.105284	0.445078	0.646691	FALSE
YKL068W-A	YKL068W-A	-0.723225	1.41963e-06	1.44833e-05	FALSE
YKL082C	RRP14	0.0452369	0.71859	0.848615	FALSE	0.148325	9.09114	0
YKL083W	YKL083W	0.0605859	0.697262	0.834588	FALSE
YKL089W	MIF2	0.513826	0.000900942	0.00552291	FALSE	0.251435	12.3145	0
YKL090W	CUE2	-0.133988	0.345649	0.552573	FALSE
YKL091C	YKL091C	0.332385	0.00020625	0.00147935	FALSE
YKL092C	BUD2	-0.139587	0.211303	0.41069	FALSE	-0.0546461	0.821463	0.744807
YKL094W	YJU3	0.0440252	0.449985	0.652132	FALSE
YKL096W	CWP1	1.17811	1.19808e-122	2.25718e-120	FALSE
YKL096W-A	CWP2	-0.103327	7.58652e-20	2.2808e-18	TRUE
YKL098W	MTC2	-0.249847	0.214792	0.415754	FALSE
YKL100C	YPF1	0.111643	0.321699	0.528864	FALSE	0.201447	7.3651	0.000403226
YKL101W	HSL1	-0.0971733	0.394107	0.597824	FALSE	-0.054444	2.44011	0.146232
YKL103C	APE1	0.0073696	0.914913	0.963025	FALSE
YKL104C	GFA1	-0.0292847	0.662306	0.811593	FALSE
YKL105C	SEG2	-0.0118364	0.929881	0.9704	FALSE	0.143182	2.16355	0.205807
YKL106W	AAT1	-0.154483	0.34648	0.553194	FALSE	-0.177108	8.41003	0
YKL108W	SLD2	0.000298164	0.998977	1	FALSE	-0.0824311	1.96475	0.256447
YKL109W	HAP4	0.26602	0.000119603	0.000906159	FALSE
YKL111C	YKL111C	1.16507e-05	0.999887	1	FALSE
YKL112W	ABF1	0.019864	0.805201	0.905505	FALSE
YKL113C	RAD27	-0.073111	0.62937	0.792603	FALSE
YKL114C	APN1	-0.0715588	0.481857	0.680524	FALSE
YKL116C	PRR1	0.348322	0.0152399	0.0619685	FALSE
YKL117W	SBA1	0.135868	3.11192e-07	3.40864e-06	TRUE
YKL119C	VPH2	0.0374396	0.552305	0.737276	FALSE
YKL120W	OAC1	-0.0775643	0.382048	0.588375	FALSE
YKL121W	DGR2	-0.0543294	0.704507	0.837936	FALSE
YKL122C	SRP21	0.0163631	0.679977	0.822719	FALSE	-0.0170633	0.533095	0.873147
YKL123W	YKL123W	-0.291349	0.234519	0.44122	FALSE	-0.1481	1.36866	0.495601
YKL124W	SSH4	-0.116237	0.605947	0.777022	FALSE	0.0969658	4.91184	0.0017991
YKL125W	RRN3	-0.00670762	0.952137	0.981663	FALSE
YKL127W	PGM1	-0.0861327	0.356835	0.561634	FALSE	-0.0365845	2.12663	0.214003
YKL129C	MYO3	0.0481527	0.803518	0.905039	FALSE	0.068871	1.97002	0.254814
YKL130C	SHE2	-0.265421	0.00307239	0.0160491	FALSE	-0.0657302	1.45524	0.4557
YKL135C	APL2	0.376538	1.01766e-08	1.3253e-07	FALSE	0.160346	8.39094	0
YKL136W	YKL136W	0.379491	8.33758e-09	1.09591e-07	FALSE
YKL137W	CMC1	0.123317	0.00546066	0.0262668	FALSE	0.0672502	1.64431	0.37625
YKL138C	MRPL31	-0.147011	0.0384837	0.126934	FALSE
YKL138C-A	HSK3	-0.233725	0.00273395	0.0145228	FALSE
YKL140W	TGL1	0.361087	0.00097828	0.00593266	FALSE
YKL141W	SDH3	0.0405774	0.187116	0.38235	FALSE
YKL142W	MRP8	-0.125548	0.0103665	0.0451397	FALSE
YKL143W	LTV1	-0.557344	0.000510004	0.00335961	FALSE	-0.136442	5.22023	0.000653595
YKL147C	YKL147C	0.826679	0.00157945	0.00901724	FALSE
YKL150W	MCR1	-0.0593915	0.248487	0.458072	FALSE	-0.0118413	0.619326	0.834143
YKL159C	RCN1	-0.144689	0.0282795	0.100259	FALSE	0.256958	7.72489	0
YKL160W	ELF1	-0.105692	0.0521573	0.157307	FALSE	-0.0838126	12.321	0
YKL161C	KDX1	-0.239608	0.108016	0.266829	FALSE	-0.345861	3.33852	0.0386696
YKL162C-A	YKL162C-A	-0.289478	0.050674	0.153818	FALSE
YKL163W	PIR3	0.404526	0.00154452	0.00888841	FALSE
YKL164C	PIR1	-0.00483393	0.923403	0.967944	FALSE
YKL167C	MRP49	-0.0297556	0.614308	0.782703	FALSE
YKL168C	KKQ8	-0.249655	0.125503	0.294824	FALSE	-0.132027	3.1319	0.0529067
YKL170W	MRPL38	-0.038221	0.810788	0.907373	FALSE	0.0283492	0.609577	0.840188
YKL171W	NNK1	0.0647242	0.70112	0.835666	FALSE	0.121321	1.36615	0.496622
YKL172W	EBP2	-0.322018	0.0140783	0.0581655	FALSE	-0.0541315	2.07479	0.226858
YKL173W	SNU114	0.0804158	0.620349	0.785793	FALSE
YKL175W	ZRT3	0.00957569	0.889906	0.951163	FALSE
YKL176C	LST4	-0.168103	0.01889	0.0736319	FALSE	-0.104462	4.46955	0.00497925
YKL179C	COY1	0.315837	0.00207146	0.0114783	TRUE	0.133666	2.47571	0.139868
YKL180W	RPL17A	0.00287117	0.924072	0.967944	FALSE	0.00156834	0.170895	0.989843
YKL182W	FAS1	-0.0773862	0.0393496	0.128557	FALSE
YKL183C-A	YKL183C-A	-0.0792093	0.3994	0.60305	FALSE
YKL183W	LOT5	0.155071	0.112366	0.273983	FALSE
YKL184W	SPE1	0.371526	0.000421524	0.00284983	FALSE
YKL186C	MTR2	-0.100435	0.101877	0.25637	FALSE	0.0215017	1.69414	0.35467
YKL188C	PXA2	-0.121361	0.622674	0.788033	FALSE	0.0440788	0.116384	0.994827
YKL189W	HYM1	0.227449	0.0935049	0.240678	FALSE	-0.0371756	0.994299	0.661112
YKL190W	CNB1	-0.0221561	0.629744	0.792719	FALSE	-0.0288623	1.48575	0.44054
YKL191W	DPH2	0.0113763	0.904391	0.960109	FALSE	0.0961297	1.24155	0.550629
YKL194C	MST1	0.272239	0.0556338	0.164975	FALSE	0.0656971	0.791615	0.757758
YKL195W	MIA40	-0.0162351	0.822044	0.91245	FALSE	0.055397	1.79793	0.315347
YKL196C	YKT6	-0.130542	6.16402e-05	0.000490691	FALSE	-0.0417809	2.63662	0.110206
YKL201C	MNN4	0.140501	0.0794875	0.2162	FALSE	0.19244	12.4905	0
YKL202W	YKL202W	0.0973988	0.264937	0.471184	FALSE
YKL203C	TOR2	-0.52375	0.00286741	0.0150899	FALSE	0.0462298	0.760905	0.771951
YKL204W	EAP1	-0.067469	0.75838	0.872987	FALSE	0.0139326	0.183728	0.987566
YKL205W	LOS1	0.175647	0.149354	0.328976	FALSE	0.0589401	1.78511	0.319447
YKL207W	EMC3	0.122785	0.000604484	0.00388244	FALSE	-0.0207464	0.904994	0.701958
YKL208W	CBT1	0.373277	0.0330093	0.11267	FALSE	0.023352	0.784596	0.761818
YKL209C	STE6	-0.0723207	0.741989	0.864513	FALSE	0.173916	7.38732	0.000403226
YKL210W	UBA1	-0.0376457	0.586213	0.761607	FALSE	-0.161979	9.19811	0
YKL213C	DOA1	0.115503	0.22342	0.425748	FALSE
YKL214C	YRA2	0.344305	7.29235e-06	6.71277e-05	FALSE
YKL215C	OXP1	0.705555	4.55779e-06	4.32225e-05	FALSE
YKL216W	URA1	-0.126385	0.0895654	0.233212	FALSE
YKL218C	SRY1	-0.00408329	0.973895	0.992907	FALSE
YKL219W	COS9	0.0283819	0.771542	0.880858	FALSE
YKL222C	YKL222C	-0.294239	0.16974	0.357441	FALSE
YKR003W	OSH6	0.0581185	0.511431	0.705716	FALSE	-0.0155558	1.07197	0.625321
YKR004C	ECM9	-0.32292	0.00205722	0.0114218	FALSE	0.0498844	1.75734	0.332058
YKR009C	FOX2	-0.271934	0.246496	0.457385	FALSE	0.102851	1.00967	0.65436
YKR012C	YKR012C	-0.0656294	0.688873	0.827702	FALSE	-0.471686	3.65623	0.0214422
YKR016W	MIC60	0.0223206	0.778051	0.885175	FALSE	0.00372812	0.816721	0.746691
YKR018C	YKR018C	-0.151437	0.117613	0.282802	FALSE
YKR019C	IRS4	0.0928226	0.681944	0.823226	FALSE
YKR030W	GMH1	0.073862	0.2833	0.491169	FALSE	0.194396	11.4328	0
YKR031C	SPO14	-0.213107	0.0466521	0.145542	FALSE	0.0901047	1.54394	0.417742
YKR034W	DAL80	1.03799	0.000235313	0.00165834	FALSE
YKR035C	OPI8	-0.0641933	0.28484	0.492156	FALSE
YKR035W-A	DID2	-0.0686344	0.252647	0.46018	FALSE
YKR037C	SPC34	-0.495936	5.19959e-05	0.00041983	FALSE
YKR038C	KAE1	0.14048	0.126586	0.29589	FALSE	0.0690577	3.41374	0.0322113
YKR039W	GAP1	-0.0218478	0.815457	0.90914	FALSE	-0.108113	8.64639	0
YKR042W	UTH1	0.613801	0.000602711	0.00387987	FALSE	0.343368	103.109	0
YKR043C	SHB17	-0.0857307	0.139729	0.3159	FALSE
YKR044W	UIP5	-0.545278	0.000268108	0.00186619	FALSE	0.216965	5.48705	0.000653595
YKR046C	PET10	-0.27645	3.48217e-12	6.22824e-11	FALSE
YKR047W	YKR047W	-0.278976	2.67755e-07	2.96736e-06	FALSE
YKR048C	NAP1	-0.264894	1.00473e-06	1.04006e-05	FALSE
YKR051W	YKR051W	-0.341839	0.000384085	0.00260919	FALSE	0.0359968	1.25418	0.545537
YKR052C	MRS4	-0.306222	0.0022063	0.0121304	FALSE	-0.10152	8.06411	0
YKR054C	DYN1	0.0689929	0.678036	0.82202	FALSE	-0.0214722	1.35836	0.499688
YKR055W	RHO4	0.0337452	0.794584	0.897839	FALSE
YKR056W	TRM2	0.0942757	0.496319	0.694699	FALSE	0.204654	9.11717	0
YKR058W	GLG1	-0.00336046	0.980954	0.996394	FALSE	0.281327	11.4084	0
YKR059W	TIF1	-0.119002	2.07359e-05	0.000180903	TRUE	0.056354	7.80084	0
YKR060W	UTP30	0.160117	0.209744	0.408296	FALSE	0.0856574	1.87018	0.290549
YKR061W	KTR2	0.0244272	0.851948	0.930295	FALSE
YKR063C	LAS1	-0.103525	0.301199	0.507566	FALSE	-0.0384993	0.755114	0.774275
YKR064W	OAF3	0.220022	0.211679	0.411138	FALSE	-0.0535379	1.34088	0.507926
YKR066C	CCP1	-0.0826775	0.294908	0.502055	FALSE	0.0622315	0.775593	0.766626
YKR067W	GPT2	-0.15992	0.143747	0.32037	FALSE	-0.0808905	1.69019	0.356547
YKR069W	MET1	0.0485079	0.63582	0.795757	FALSE
YKR070W	YKR070W	-0.204156	0.0513181	0.155273	FALSE
YKR071C	DRE2	-0.0878387	0.194047	0.390027	FALSE
YKR072C	SIS2	0.324129	0.00816346	0.036971	FALSE
YKR074W	AIM29	-0.0998216	0.00509225	0.0246839	FALSE
YKR075C	YKR075C	-0.372286	4.49967e-06	4.2815e-05	FALSE	0.314322	14.0529	0
YKR078W	YKR078W	0.18134	0.381134	0.587928	FALSE	0.0380869	0.431177	0.914918
YKR081C	RPF2	0.00554472	0.956609	0.983762	FALSE	0.0582553	3.40443	0.0330542
YKR082W	NUP133	-0.056986	0.686431	0.826525	FALSE
YKR083C	DAD2	-0.191135	0.0640656	0.18362	FALSE
YKR084C	HBS1	-0.124909	0.193765	0.390015	FALSE
YKR085C	MRPL20	-0.683605	8.83533e-48	7.8027e-46	TRUE	-0.133548	6.77813	0.000403226
YKR087C	OMA1	-0.716255	2.39431e-09	3.38316e-08	FALSE	-0.46517	28.2643	0
YKR089C	TGL4	-0.463254	0.00182189	0.0102359	FALSE	-0.160567	6.27016	0.000403226
YKR090W	PXL1	-0.317249	0.0392297	0.128419	FALSE	-0.0130717	0.635644	0.827537
YKR091W	SRL3	0.198764	0.174673	0.364912	FALSE	0.0143056	0.797637	0.754949
YKR092C	SRP40	0.150405	0.0196842	0.0756838	FALSE
YKR093W	PTR2	0.469877	0.0159146	0.0643414	FALSE	-0.322931	1.85558	0.29651
YKR095W	MLP1	-0.146098	0.267707	0.474022	FALSE	0.0491288	0.970026	0.670582
YKR096W	ESL2	0.28283	0.103765	0.258817	FALSE	0.128561	3.17193	0.0494771
YKR097W	PCK1	-0.236389	0.333101	0.540118	FALSE	-0.353475	6.12271	0.000403226
YKR098C	UBP11	-0.269717	0.199898	0.396986	FALSE	-0.181824	4.4415	0.00537888
YKR100C	SKG1	-0.0166368	0.872928	0.940501	FALSE	-0.00447286	0.965332	0.673
YLL007C	LMO1	1.02578	1.90496e-09	2.7327e-08	FALSE	0.790402	38.671	0
YLL009C	COX17	-0.147636	0.0276348	0.0987052	FALSE	-0.0236526	0.761097	0.771892
YLL010C	PSR1	-1.97155	4.57529e-18	1.24325e-16	FALSE	-0.301868	5.59724	0.000403226
YLL012W	YEH1	-0.16196	0.390778	0.596296	FALSE
YLL013C	PUF3	0.494019	0.0194952	0.0750592	FALSE	0.482815	6.89441	0.000403226
YLL014W	EMC6	-0.608533	3.70091e-54	3.60648e-52	FALSE	-0.00157267	1.01115	0.653507
YLL018C	DPS1	-0.0315528	0.475318	0.674602	FALSE
YLL021W	SPA2	-0.0593769	0.806604	0.905505	FALSE	0.0540001	0.557337	0.862175
YLL022C	HIF1	-0.123048	0.299408	0.505452	FALSE	-0.0691797	1.64747	0.375173
YLL023C	POM33	0.103788	0.065357	0.186564	FALSE	0.233363	13.1049	0
YLL024C	SSA2	-0.0585942	0.0419511	0.134567	FALSE	0.0183004	2.38514	0.157173
YLL027W	ISA1	-0.0302102	0.725928	0.85478	FALSE	-0.000135521	1.58443	0.399738
YLL028W	TPO1	-0.626046	2.74638e-11	4.6198e-10	FALSE
YLL031C	GPI13	0.127422	0.14994	0.329239	FALSE	0.0446376	1.02744	0.645842
YLL034C	RIX7	-0.405465	0.0187585	0.0732202	FALSE	0.0529363	1.67938	0.362013
YLL035W	GRC3	-0.413159	0.0194096	0.0749337	FALSE	-0.0659562	0.366557	0.937292
YLL036C	PRP19	-0.253598	0.0859231	0.228001	FALSE	-0.0588633	1.25932	0.542931
YLL037W	YLL037W	-0.175195	0.27389	0.480753	FALSE
YLL038C	ENT4	0.606136	0.0169117	0.0675989	FALSE	0.724835	13.232	0
YLL039C	UBI4	-2.93268	5.23124e-57	5.27982e-55	FALSE	-0.0187783	1.8094	0.311717
YLL045C	RPL8B	-0.011607	0.349219	0.555057	FALSE	-0.00159855	1.2619	0.541421
YLL050C	COF1	-0.118274	0.111889	0.273528	FALSE	0.0312203	5.30889	0.000653595
YLL055W	YCT1	0.520006	2.07207e-10	3.23517e-09	FALSE	0.291901	43.6736	0
YLL058W	YLL058W	0.118167	0.451532	0.653368	FALSE	-0.0143381	2.7729	0.0912563
YLL060C	GTT2	-0.515114	0.022283	0.0832252	FALSE
YLL061W	MMP1	-0.148348	0.159904	0.342859	FALSE	-0.200942	15.6868	0
YLR001C	YLR001C	0.225301	0.0920083	0.238351	FALSE	0.0820806	1.67359	0.364098
YLR008C	PAM18	-0.00603331	0.91253	0.963025	FALSE	-0.0629087	3.11368	0.0544913
YLR019W	PSR2	0.158687	0.423311	0.625668	FALSE
YLR021W	IRC25	-0.011921	0.914613	0.963025	FALSE	-0.0399187	0.964586	0.673384
YLR022C	SDO1	-0.011921	0.914613	0.963025	FALSE	0.0650008	1.24865	0.548134
YLR026C	SED5	-0.236047	0.0285529	0.100737	FALSE	-0.0647938	2.95157	0.07463
YLR027C	AAT2	-0.0939241	0.0222088	0.0832088	FALSE
YLR028C	ADE16	0.0107899	0.914717	0.963025	FALSE
YLR030W	YLR030W	0.800778	0.00181547	0.0102201	FALSE
YLR034C	SMF3	0.165582	0.050772	0.15395	FALSE	0.0253693	0.547755	0.867224
YLR038C	COX12	-0.0255073	0.281352	0.488691	FALSE
YLR045C	STU2	0.187075	0.188393	0.38421	FALSE	-0.0107116	7.23629	0.000403226
YLR046C	YLR046C	0.237682	0.0405533	0.131126	FALSE	0.109788	1.84005	0.301684
YLR048W	RPS0B	-0.0367298	0.0177731	0.0702472	FALSE	-0.0190144	3.94121	0.0119526
YLR049C	YLR049C	-0.141121	0.101725	0.256218	FALSE	-0.281159	19.6153	0
YLR050C	YLR050C	0.715171	1.0569e-39	7.28485e-38	TRUE
YLR051C	FCF2	0.102119	0.194715	0.39109	FALSE
YLR052W	IES3	-0.0495757	0.556751	0.741111	FALSE
YLR053C	YLR053C	0.453931	2.98368e-05	0.000254739	FALSE
YLR056W	ERG3	-0.260707	3.65353e-09	5.08615e-08	FALSE
YLR057W	MNL2	0.20205	9.35311e-19	2.66989e-17	FALSE
YLR058C	SHM2	0.180734	7.1212e-16	1.69113e-14	FALSE
YLR059C	REX2	-0.190538	0.0966167	0.245539	FALSE
YLR060W	FRS1	-0.0543928	0.3698	0.576741	FALSE
YLR064W	PER33	-0.0793416	0.331918	0.539731	FALSE
YLR065C	ENV10	0.199365	0.00204681	0.0113864	TRUE	-0.053016	3.53067	0.0256656
YLR066W	SPC3	-0.00280449	0.97198	0.992347	FALSE	-0.00129956	1.14384	0.591279
YLR069C	MEF1	0.115235	0.564402	0.747073	FALSE	0.0930091	1.6782	0.362437
YLR070C	XYL2	0.152016	0.361442	0.567368	FALSE	0.619048	15.7909	0
YLR071C	RGR1	-0.166359	0.386587	0.592139	FALSE	-0.0862205	1.91891	0.274149
YLR072W	LAM6	0.136579	0.499523	0.696632	FALSE	0.096395	3.13687	0.0523907
YLR073C	RFU1	-1.06088	7.89252e-11	1.28185e-09	FALSE	-0.603938	80.2502	0
YLR074C	BUD20	0.0196821	0.776776	0.885175	FALSE
YLR075W	RPL10	-0.0340037	0.00104012	0.00625401	FALSE	0.0415568	25.3678	0
YLR079W	SIC1	-0.138841	0.291653	0.49922	FALSE	-0.0360835	1.0919	0.615395
YLR082C	SRL2	-0.25025	0.134946	0.308542	FALSE	0.161973	1.33703	0.509383
YLR083C	EMP70	0.0689773	0.34099	0.547833	FALSE
YLR085C	ARP6	0.064769	0.736396	0.861721	FALSE	0.092532	2.22594	0.189878
YLR086W	SMC4	-0.257829	0.258836	0.467418	FALSE	-0.101462	5.75184	0.000403226
YLR088W	GAA1	-0.0625016	0.597777	0.770674	FALSE	0.00911543	0.439033	0.91156
YLR089C	ALT1	-0.134431	0.0822769	0.221021	FALSE	0.0330213	1.71891	0.345879
YLR090W	XDJ1	0.0450914	0.662	0.811593	FALSE	0.0546993	2.10008	0.220727
YLR091W	GEP5	0.058174	0.658292	0.810956	FALSE	0.00739736	0.430281	0.915301
YLR092W	SUL2	-0.0258171	0.6062	0.777022	FALSE
YLR093C	NYV1	-0.204457	0.00116778	0.00693143	FALSE	0.0278798	3.06334	0.0604741
YLR095C	IOC2	0.164589	0.391181	0.596399	FALSE
YLR096W	KIN2	-0.339868	0.0922882	0.238769	FALSE	0.0513853	0.628872	0.830823
YLR097C	HRT3	-0.200716	0.122185	0.289051	FALSE	-0.0179061	2.17635	0.202591
YLR099C	ICT1	-0.250143	0.0283252	0.100259	FALSE	0.345112	17.4281	0
YLR104W	LCL2	0.154764	0.128194	0.298688	FALSE	-0.010299	0.798801	0.754406
YLR105C	SEN2	0.154764	0.128194	0.298688	FALSE	0.0237442	1.7427	0.337579
YLR107W	REX3	-0.242224	0.021257	0.0800964	FALSE	-0.0221837	0.862584	0.725667
YLR110C	CCW12	-0.0988051	1.34657e-28	7.04706e-27	TRUE	0.121559	293.366	0
YLR113W	HOG1	-0.0924428	0.174708	0.364912	FALSE	0.0893516	5.87802	0.000403226
YLR116W	MSL5	0.238405	0.0787792	0.214687	FALSE	0.347345	10.1818	0
YLR117C	CLF1	0.305827	0.020936	0.0790979	FALSE	0.0525872	0.745557	0.777798
YLR118C	YLR118C	-0.147792	0.0223675	0.0833911	FALSE
YLR120C	YPS1	-0.0582201	0.463482	0.664873	FALSE	0.0458212	1.82114	0.307303
YLR140W	YLR140W	-0.0698578	0.762387	0.874393	FALSE
YLR141W	RRN5	-0.0698578	0.762387	0.874393	FALSE	-0.223132	3.32788	0.0400432
YLR146W-A	YLR146W-A	0.134007	0.0498842	0.152733	FALSE	0.056631	0.974596	0.668076
YLR152C	YLR152C	0.177271	0.374678	0.582415	FALSE
YLR163C	MAS1	0.0270847	0.722593	0.851919	FALSE
YLR164W	SHH4	-0.312081	0.00703937	0.0326119	FALSE
YLR165C	PUS5	-0.302666	0.0193542	0.0748221	FALSE
YLR168C	UPS2	0.170385	0.00064093	0.00407026	FALSE	-0.188448	12.9884	0
YLR169W	YLR169W	0.231782	1.74946e-05	0.000155471	FALSE
YLR170C	APS1	0.22084	3.34131e-05	0.000282711	FALSE
YLR171W	YLR171W	0.0906326	0.339036	0.546617	FALSE
YLR172C	DPH5	0.0427924	0.498098	0.696154	TRUE
YLR173W	YLR173W	0.13062	0.531906	0.720598	FALSE
YLR174W	IDP2	0.150196	0.429915	0.631465	FALSE	0.353771	6.94053	0.000403226
YLR175W	CBF5	-0.0380231	0.562718	0.746592	FALSE	-0.0135161	0.604985	0.842103
YLR176C	RFX1	-0.563935	0.00970112	0.0427697	FALSE	-0.236739	4.32984	0.00694259
YLR177W	YLR177W	0.11683	0.586432	0.761607	FALSE
YLR179C	YLR179C	1.32334	4.28503e-28	2.20173e-26	FALSE
YLR180W	SAM1	0.277668	0.0335355	0.113771	FALSE
YLR181C	VTA1	-0.137212	0.188066	0.384014	FALSE
YLR185W	RPL37A	-0.0476971	0.00790532	0.0359749	FALSE	-0.00250051	1.41279	0.476222
YLR187W	SKG3	-0.223608	0.162347	0.346077	FALSE	-0.0422708	2.91734	0.0758295
YLR188W	MDL1	0.133531	0.563992	0.747073	FALSE	-0.202488	3.74518	0.0194444
YLR189C	ATG26	0.315297	0.080868	0.219111	FALSE	-0.0229491	0.795473	0.755958
YLR190W	MMR1	-0.105949	0.156347	0.337279	FALSE	0.0474664	0.981872	0.664576
YLR196W	PWP1	-0.00870943	0.945991	0.978539	FALSE	0.0806881	4.50477	0.00475524
YLR200W	YKE2	0.219275	0.0114598	0.0486998	FALSE	-0.0250294	0.491755	0.889814
YLR205C	HMX1	-0.0672667	0.435224	0.636616	FALSE	0.0938061	11.22	0
YLR206W	ENT2	-0.216963	0.00740232	0.0341255	FALSE
YLR207W	HRD3	-0.105887	0.586413	0.761607	FALSE	-0.0187088	0.0885537	0.997401
YLR215C	CDC123	0.311308	0.00517965	0.0250645	FALSE	0.105184	3.5738	0.0245034
YLR216C	CPR6	-0.232728	6.95583e-07	7.38992e-06	FALSE
YLR219W	MSC3	-0.0118346	0.938683	0.973832	FALSE	0.00373391	1.06354	0.630165
YLR221C	RSA3	-0.197781	0.0283465	0.100259	FALSE	-0.00502655	1.1418	0.592143
YLR224W	UCC1	-0.0515334	0.594543	0.768257	FALSE	-0.00186836	0.690386	0.804046
YLR225C	YLR225C	-0.0969217	0.250286	0.459534	FALSE	-0.013676	1.03514	0.642509
YLR227C	ADY4	-0.334136	0.0564452	0.166681	FALSE	-0.0571776	0.902419	0.703373
YLR228C	ECM22	0.547405	0.000168615	0.00123128	FALSE
YLR229C	CDC42	0.0371287	0.466863	0.668482	FALSE
YLR233C	EST1	0.0260424	0.888039	0.950241	FALSE	-0.440817	4.0964	0.00898181
YLR237W	THI7	0.0631462	0.452823	0.653898	FALSE
YLR242C	ARV1	0.0892292	0.352839	0.558612	FALSE	0.0144339	0.19938	0.984484
YLR243W	GPN3	0.081218	0.564135	0.747073	FALSE	0.0188239	1.87949	0.286869
YLR246W	ERF2	0.22506	0.240825	0.450412	FALSE	0.0990549	2.59078	0.11831
YLR247C	IRC20	0.119353	0.515628	0.708393	FALSE	0.187355	7.34842	0.000403226
YLR248W	RCK2	-0.306979	4.92583e-06	4.64661e-05	FALSE
YLR249W	YEF3	0.206263	0.309765	0.516153	FALSE	-0.0150496	0.868939	0.721255
YLR251W	SYM1	-0.000515217	0.994097	1	FALSE
YLR252W	YLR252W	0.0181612	0.791071	0.89595	FALSE
YLR253W	MCP2	0.0115255	0.937525	0.973345	FALSE	0.111756	2.53794	0.126736
YLR254C	NDL1	-0.00377174	0.968755	0.990128	FALSE	0.128867	5.34115	0.000653595
YLR256W	HAP1	-1.23095	1.42681e-19	4.20017e-18	FALSE
YLR257W	YLR257W	-0.150904	0.000514294	0.00337214	FALSE
YLR258W	GSY2	-0.148422	0.00138529	0.00803867	FALSE	-0.134252	5.28	0.000653595
YLR259C	HSP60	-0.0715376	0.0378506	0.125106	FALSE	0.000929758	0.648223	0.822058
YLR260W	LCB5	0.350913	0.0524613	0.158055	FALSE
YLR261C	VPS63	-0.0946862	0.128778	0.299035	FALSE	-0.034476	0.79207	0.757546
YLR262C	YPT6	-0.0946862	0.128778	0.299035	FALSE	-0.0841697	2.5007	0.135193
YLR262C-A	TMA7	0.81452	2.85326e-11	4.74312e-10	FALSE
YLR264C-A	YLR264C-A	0.210796	2.16237e-72	2.77766e-70	FALSE
YLR264W	RPS28B	0.143911	9.15942e-30	5.1769e-28	FALSE	0.218878	226.276	0
YLR267W	BOP2	0.264693	0.252733	0.46018	FALSE
YLR268W	SEC22	0.0684602	0.612081	0.781262	FALSE
YLR269C	YLR269C	0.0305675	0.824225	0.914511	FALSE
YLR270W	DCS1	0.00278559	0.957907	0.984739	FALSE
YLR271W	CMG1	-0.281139	0.0782354	0.21403	FALSE	0.0752647	1.32992	0.511628
YLR272C	YCS4	-0.269163	0.0482989	0.149827	FALSE	-0.0424599	1.38003	0.49103
YLR273C	PIG1	0.541353	0.0122426	0.0513319	FALSE	0.118164	1.34112	0.507787
YLR274W	MCM5	-0.105349	0.290813	0.498933	FALSE	0.105874	3.19951	0.0477874
YLR275W	SMD2	0.193713	0.00563968	0.0266964	FALSE	0.0174212	0.90841	0.700081
YLR276C	DBP9	-0.0109742	0.899604	0.958496	FALSE	-0.137148	6.94511	0.000403226
YLR277C	YSH1	0.353406	0.018263	0.0715411	FALSE	0.0437631	0.932118	0.689089
YLR278C	YLR278C	-0.123614	0.578757	0.75826	FALSE	0.0850584	1.03405	0.643036
YLR279W	YLR279W	0.429333	0.00551049	0.0263052	FALSE
YLR280C	YLR280C	0.429333	0.00551049	0.0263052	FALSE
YLR281C	YLR281C	0.429333	0.00551049	0.0263052	FALSE
YLR283W	YLR283W	-0.187588	0.138806	0.314065	FALSE	0.141956	4.20272	0.00772655
YLR284C	ECI1	-0.120745	0.322885	0.529584	FALSE
YLR285C-A	YLR285C-A	-0.0139799	0.869621	0.939072	FALSE
YLR285W	NNT1	0.0121942	0.865655	0.937325	FALSE
YLR286C	CTS1	0.204705	6.4343e-25	2.67402e-23	TRUE
YLR286W-A	YLR286W-A	0.161835	8.84912e-13	1.66718e-11	TRUE
YLR287C	YLR287C	-0.00558727	0.949994	0.980527	FALSE
YLR287C-A	RPS30A	0.0233766	0.0117497	0.0497076	FALSE
YLR288C	MEC3	0.285729	0.0375895	0.124535	FALSE
YLR289W	GUF1	0.140771	0.0668711	0.189167	FALSE	-6.532e-05	0.42726	0.915982
YLR290C	COQ11	0.150795	0.0357038	0.119407	FALSE	-0.109627	3.47063	0.0300338
YLR291C	GCD7	0.241471	0.00115503	0.00689964	FALSE
YLR292C	SEC72	0.0359897	0.515219	0.708176	FALSE
YLR293C	GSP1	-0.220317	0.0321803	0.1105	FALSE
YLR294C	YLR294C	-0.256587	1.7744e-22	6.59798e-21	FALSE	-0.0951556	3.6013	0.0234827
YLR295C	ATP14	-0.255504	3.43266e-22	1.25983e-20	FALSE	-0.0661136	2.27093	0.180971
YLR297W	YLR297W	0.0932171	0.399473	0.60305	FALSE
YLR298C	YHC1	0.180051	0.107088	0.265699	FALSE
YLR299C-A	YLR299C-A	0.342945	0.0331096	0.112868	FALSE
YLR299W	ECM38	0.335458	0.00288446	0.0151515	FALSE
YLR300W	EXG1	0.214372	0.0421259	0.134822	FALSE
YLR301W	HRI1	-4.70137	1.52846e-14	3.19958e-13	FALSE
YLR303W	MET17	-0.0773441	0.000175839	0.00127743	FALSE	0.0132519	1.83478	0.303075
YLR305C	STT4	-0.238975	0.078388	0.214033	FALSE	-0.188712	6.24232	0.000403226
YLR306W	UBC12	-0.547105	0.00435336	0.021736	FALSE	-0.00499676	0.10755	0.99508
YLR309C	IMH1	0.0381551	0.658	0.81095	FALSE	0.0164622	0.881492	0.714618
YLR310C	CDC25	-0.133115	0.0927668	0.239633	FALSE
YLR311C	YLR311C	-0.249607	0.154629	0.335798	FALSE	-0.0277579	1.83641	0.302644
YLR312C	ATG39	-0.171939	0.269558	0.476023	FALSE	0.226112	1.91534	0.274975
YLR312W-A	MRPL15	0.133402	0.0431704	0.137044	FALSE
YLR314C	CDC3	0.138793	0.263031	0.469544	FALSE	0.0459698	3.4719	0.0299722
YLR316C	TAD3	0.277517	0.0636319	0.182748	FALSE	-0.0996577	2.33977	0.165969
YLR317W	YLR317W	0.216502	0.194964	0.391313	FALSE	0.288996	6.39572	0.000403226
YLR318W	EST2	-0.0379193	0.779568	0.885608	FALSE	0.0704563	2.92454	0.0754681
YLR319C	BUD6	-0.0201591	0.884976	0.948045	FALSE	0.144342	2.47767	0.139286
YLR324W	PEX30	-0.0881991	0.200388	0.397679	FALSE	0.0629456	1.26864	0.537292
YLR325C	RPL38	0.0419778	1.0825e-05	9.80495e-05	FALSE	0.0131523	2.53722	0.126939
YLR326W	YLR326W	0.192195	0.0553577	0.164329	FALSE
YLR327C	TMA10	0.0602896	0.306522	0.513058	FALSE
YLR328W	NMA1	0.402459	0.000153667	0.00113681	FALSE
YLR330W	CHS5	-0.301137	2.87689e-05	0.000246366	FALSE
YLR333C	RPS25B	-0.0675887	0.000985973	0.00596651	FALSE	-0.000281148	2.24563	0.186502
YLR335W	NUP2	-0.201564	0.0144294	0.0591835	FALSE	0.1354	8.18982	0
YLR336C	SGD1	-0.215698	0.123773	0.291972	FALSE	-0.0374639	0.647683	0.82227
YLR337C	VRP1	-0.0691346	0.546166	0.732095	FALSE	0.0627038	0.593301	0.846912
YLR339C	YLR339C	0.0657563	0.659995	0.811593	FALSE
YLR340W	RPP0	0.000688708	0.960858	0.987054	FALSE	-0.0219106	4.96544	0.0017991
YLR341W	SPO77	-0.0800651	0.499397	0.696632	FALSE
YLR342W	FKS1	-0.140175	0.0011702	0.00693143	FALSE
YLR343W	GAS2	-0.458295	0.020303	0.0775955	FALSE
YLR344W	RPL26A	-0.334526	1.58862e-10	2.50807e-09	FALSE
YLR345W	YLR345W	0.0529369	0.579056	0.758301	FALSE	0.0755848	1.52478	0.427684
YLR346C	CIS1	0.342658	0.0464113	0.145087	FALSE	1.34981	72.8659	0
YLR347C	KAP95	-0.296903	0.0036404	0.0186036	FALSE
YLR350W	ORM2	0.0985013	0.00529823	0.0255945	FALSE
YLR351C	NIT3	0.189478	0.000192574	0.0013883	FALSE
YLR352W	YLR352W	-0.0752809	0.599306	0.771589	FALSE
YLR353W	BUD8	-0.844242	0.00137023	0.00796766	FALSE	-0.0216141	1.03032	0.644843
YLR354C	TAL1	-0.0954397	0.00105485	0.00632909	FALSE	-0.0425609	6.12769	0.000403226
YLR355C	ILV5	-0.0707322	0.000120937	0.000911384	FALSE
YLR356W	ATG33	0.0132075	0.859943	0.934692	FALSE
YLR357W	RSC2	-0.118372	0.427492	0.629542	FALSE
YLR358C	YLR358C	-0.195178	0.246104	0.457198	FALSE
YLR359W	ADE13	-0.388079	0.00329575	0.0170271	FALSE
YLR360W	VPS38	0.149523	0.142036	0.317676	FALSE	0.105491	2.15943	0.206671
YLR361C-A	YLR361C-A	-0.579823	1.48691e-11	2.53133e-10	FALSE	-0.187619	9.68909	0
YLR362W	STE11	0.300468	0.0643332	0.1842	FALSE	0.0194351	0.599381	0.844435
YLR364W	GRX8	-0.376106	1.80676e-06	1.82354e-05	FALSE	-0.299021	35.6481	0
YLR367W	RPS22B	0.401043	0.0666542	0.188944	FALSE
YLR368W	MDM30	0.0373306	0.772039	0.880858	FALSE
YLR370C	ARC18	-0.0199354	0.655788	0.808577	FALSE	0.0315086	2.23688	0.187476
YLR371W	ROM2	-0.241162	0.299868	0.505927	FALSE	-0.0381899	0.90635	0.701213
YLR373C	VID22	0.227301	0.0165929	0.0665128	FALSE
YLR375W	STP3	-0.136018	0.0496019	0.152199	FALSE	-0.150748	11.0444	0
YLR377C	FBP1	0.35364	0.119442	0.285392	FALSE
YLR378C	SEC61	-0.281736	0.00459478	0.0228205	FALSE
YLR380W	CSR1	0.0120725	0.892954	0.953699	FALSE	0.0527752	2.16153	0.206283
YLR381W	CTF3	0.0680875	0.75086	0.867917	FALSE	0.836843	12.7425	0
YLR382C	NAM2	-0.0162605	0.928155	0.969674	FALSE	0.134158	1.15134	0.58815
YLR383W	SMC6	-0.0863695	0.616017	0.783669	FALSE	0.0871189	0.74534	0.777865
YLR384C	IKI3	0.0378429	0.713023	0.845929	FALSE	0.0379769	1.50952	0.432315
YLR386W	VAC14	-0.0392437	0.803398	0.905039	FALSE	0.124366	2.27602	0.179338
YLR389C	STE23	0.500705	2.90658e-06	2.83241e-05	FALSE
YLR390W	ECM19	-0.403095	0.0765831	0.21094	FALSE	-0.0809508	1.73395	0.340863
YLR390W-A	CCW14	0.042987	0.0392559	0.128419	FALSE	0.0156274	1.90733	0.277124
YLR392C	ART10	-0.345575	0.065554	0.186938	FALSE	-0.142209	4.0195	0.0105892
YLR396C	VPS33	-0.155485	0.269096	0.475885	FALSE	-0.0429137	0.794641	0.756346
YLR397C	AFG2	-0.124588	0.474907	0.674602	FALSE	-0.0161753	2.18451	0.200096
YLR398C	SKI2	-0.166931	0.405289	0.60858	FALSE	0.103571	1.51398	0.431411
YLR399C	BDF1	-0.0413741	0.59341	0.767495	FALSE	-0.0369254	1.6001	0.392293
YLR400W	YLR400W	0.158756	0.253494	0.460987	FALSE
YLR401C	DUS3	0.206219	0.125885	0.295474	FALSE
YLR403W	SFP1	0.261975	0.20286	0.400645	FALSE	0.333454	4.90415	0.0017991
YLR405W	DUS4	-0.451985	0.0365867	0.121927	FALSE	0.0258129	1.50503	0.433457
YLR407W	YLR407W	0.421213	0.0339128	0.114775	FALSE	0.0448421	0.939852	0.685298
YLR413W	INA1	-0.345658	5.86922e-05	0.00046987	FALSE
YLR414C	PUN1	-0.209177	0.01095	0.0469572	FALSE
YLR417W	VPS36	-0.0525958	0.774287	0.883025	FALSE
YLR419W	YLR419W	-0.021227	0.914225	0.963025	FALSE	0.0406569	2.40984	0.151009
YLR420W	URA4	-0.0093018	0.84923	0.928764	FALSE	0.282911	25.7377	0
YLR421C	RPN13	0.0196259	0.642971	0.799048	FALSE	0.0382339	2.67239	0.10453
YLR426W	TDA5	-0.106396	0.302086	0.508455	FALSE
YLR427W	MAG2	-0.273176	0.120974	0.288736	FALSE
YLR428C	YLR428C	-0.291464	0.149226	0.328949	FALSE
YLR429W	CRN1	-0.126548	0.206182	0.403056	FALSE
YLR435W	TSR2	0.142963	0.0436436	0.137961	FALSE	0.0563322	1.643	0.376699
YLR436C	ECM30	-0.175851	0.209472	0.408253	FALSE	-0.00149924	1.29185	0.52809
YLR437C	DIF1	0.113901	0.164758	0.349816	FALSE
YLR438C-A	LSM3	0.0378858	0.469559	0.670867	FALSE
YLR438W	CAR2	0.303284	0.0436293	0.137961	FALSE
YLR439W	MRPL4	-0.0411318	0.753868	0.869919	FALSE	0.02401	0.47318	0.897606
YLR440C	SEC39	0.0241487	0.840671	0.923943	FALSE	-0.159227	3.20971	0.0476314
YLR442C	SIR3	0.0970771	0.546091	0.732095	FALSE	0.0485823	0.656882	0.817657
YLR443W	ECM7	0.213106	0.0782066	0.21403	FALSE	0.00305341	0.221447	0.978952
[truncated: 828 more rows]

## Sheet: S2 (Cross B)
transcript	gene name	estimate (ASE)	p-value (ASE)	adjust p-value (ASE)	has cell-cycle interaction (ASE)	estimate (one-pot)	LOD (one-pot)	FDR (one-pot)
YAL001C	TFC3	0.28219	0.0570832	0.151418	FALSE
YAL002W	VPS8	0.0618172	0.719418	0.844944	FALSE	-0.00995764	0.18362	0.986353
YAL003W	EFB1	-0.381005	6.297e-90	6.09448e-88	TRUE	-0.0235217	5.70418	0.00201681
YAL005C	SSA1	-0.30907	0.000202915	0.00122951	FALSE	-0.127432	15.619	0
YAL008W	FUN14	-0.123282	0.4597	0.648872	FALSE	-0.13797	4.51371	0.00681818
YAL010C	MDM10	0.260283	0.234142	0.416439	FALSE	0.0225182	1.97551	0.251393
YAL011W	SWC3	0.42103	0.0264369	0.0842264	FALSE	0.169222	5.1533	0.00301205
YAL012W	CYS3	-0.00477931	0.914824	0.958236	FALSE	0.0611436	7.28778	0.000609756
YAL013W	DEP1	0.157132	0.392287	0.586547	FALSE	-0.0192314	0.993145	0.658066
YAL016C-B	YAL016C-B	-0.278156	0.0334601	0.101029	FALSE
YAL016W	TPD3	-0.410079	1.95419e-06	1.6199e-05	FALSE
YAL017W	PSK1	-0.209697	0.0781851	0.19309	FALSE
YAL019W	FUN30	-0.1408	0.404084	0.597204	FALSE	-0.00479933	2.42645	0.143852
YAL020C	ATS1	0.770946	0.000308553	0.00180249	FALSE	0.0198835	0.778829	0.749576
YAL021C	CCR4	0.0346856	0.819588	0.903079	FALSE	0.0717149	1.88514	0.279688
YAL022C	FUN26	-0.0778394	0.601576	0.765139	FALSE	-0.00221012	2.25813	0.176682
YAL025C	MAK16	0.120777	0.173605	0.341366	FALSE	0.0699563	3.3692	0.0366967
YAL026C-A	YAL026C-A	-0.918376	3.32862e-06	2.66662e-05	FALSE	0.0911679	0.558312	0.850316
YAL027W	SAW1	-0.896	4.41133e-06	3.46425e-05	FALSE	-0.317545	6.16059	0.00107914
YAL028W	FRT2	-0.10731	0.591403	0.758529	FALSE	0.180285	2.95179	0.0661138
YAL029C	MYO4	0.143378	0.0273846	0.0868595	FALSE	-0.00697725	1.51264	0.417105
YAL030W	SNC1	0.190906	0.00623429	0.0259895	FALSE	0.0146238	1.87327	0.283911
YAL032C	PRP45	0.0930137	0.524573	0.704613	FALSE	-0.0586303	0.975087	0.667079
YAL033W	POP5	-0.160756	0.0571352	0.151444	FALSE	0.122504	4.3399	0.00927282
YAL034C-B	YAL034C-B	0.276056	0.000535437	0.00295895	FALSE
YAL034W-A	MTW1	-0.0193007	0.907253	0.954136	FALSE
YAL035W	FUN12	0.105986	0.0596408	0.156579	FALSE
YAL036C	RBG1	0.0154473	0.815249	0.902831	FALSE
YAL038W	CDC19	-0.206041	0.304536	0.49579	FALSE
YAL039C	CYC3	-0.238255	7.10835e-05	0.000470518	FALSE
YAL040C	CLN3	-0.121307	0.574901	0.745913	FALSE	-0.0443575	0.937547	0.681445
YAL041W	CDC24	0.276034	0.0281829	0.0887626	FALSE	0.0659531	1.57105	0.393696
YAL042W	ERV46	-0.0161623	0.908574	0.954136	FALSE	-0.0899546	4.06028	0.015062
YAL043C	PTA1	0.410705	0.0172879	0.0602216	FALSE	-0.0343607	2.20747	0.189508
YAL044C	GCV3	0.196182	4.33988e-16	7.58103e-15	FALSE	-0.00819854	0.919643	0.690318
YAL044W-A	BOL1	0.218517	0.000855873	0.00452048	FALSE	0.0641198	1.78078	0.310392
YAL045C	YAL045C	-0.0854673	0.392053	0.586547	FALSE
YAL046C	BOL3	-0.201696	0.000295081	0.00172661	FALSE	0.251414	16.7	0
YAL049C	AIM2	-0.628609	0.00132443	0.00663325	FALSE	-0.387404	74.7859	0
YAL053W	FLC2	0.012321	0.94363	0.969068	FALSE	-0.103615	2.17958	0.196641
YAL055W	PEX22	-0.15739	0.280135	0.468988	FALSE	-0.260735	13.6781	0
YAL056C-A	YAL056C-A	-0.146047	0.37077	0.56789	FALSE
YAL056W	GPB2	-0.158648	0.335715	0.528903	FALSE
YAL058W	CNE1	-0.18237	0.259777	0.446811	FALSE	0.165705	2.06701	0.222933
YAL059W	ECM1	0.226035	0.0177673	0.0614733	FALSE	0.265803	15.0039	0
YAL060W	BDH1	1.26808	7.57055e-47	3.87288e-45	FALSE	0.465319	124.703	0
YAL061W	BDH2	-0.173016	0.181018	0.350014	FALSE
YAR003W	SWD1	-0.0286884	0.808797	0.900592	FALSE	-0.0281808	0.941504	0.680085
YAR007C	RFA1	0.0853915	0.54221	0.721001	FALSE	0.003097	2.03361	0.232676
YAR014C	BUD14	0.215474	0.0624835	0.162376	FALSE
YAR015W	ADE1	-0.18261	0.128878	0.27975	FALSE	-0.0562498	5.20709	0.00301205
YAR019C	CDC15	0.0537948	0.701177	0.833913	FALSE
YAR023C	YAR023C	1.27766	3.18332e-06	2.56745e-05	FALSE
YAR027W	UIP3	0.717881	2.1631e-08	2.23343e-07	FALSE	-0.128675	4.201	0.0119484
YAR029W	YAR029W	1.45991	1.64373e-14	2.58166e-13	FALSE	1.08433	35.4131	0
YAR030C	YAR030C	1.1847	1.72076e-12	2.48469e-11	FALSE
YAR033W	MST28	1.93016	3.49847e-31	1.17084e-29	FALSE	0.492307	17.7588	0
YAR042W	SWH1	0.458367	0.00703938	0.0286455	FALSE	0.727339	29.7788	0
YBL001C	ECM15	-0.0504968	0.229077	0.411195	FALSE	-0.00670498	0.58363	0.839317
YBL002W	HTB2	-0.029559	0.83325	0.91027	FALSE	0.000361979	0.195339	0.985066
YBL003C	HTA2	-0.145923	0.0133852	0.048319	FALSE	-0.0144172	1.34604	0.494273
YBL006C	LDB7	0.614346	6.21353e-05	0.000413581	FALSE	-0.155272	9.81511	0.000609756
YBL006W-A	YBL006W-A	0.679739	1.73238e-05	0.000126864	FALSE
YBL009W	ALK2	-0.0347276	0.838698	0.913792	FALSE	0.00955084	0.316892	0.950226
YBL011W	SCT1	-0.125383	0.20645	0.38485	FALSE	-0.111184	2.87399	0.0750157
YBL015W	ACH1	-0.255503	0.014698	0.0523195	FALSE	0.094757	1.30819	0.514385
YBL017C	PEP1	-0.0564656	0.652423	0.801295	FALSE	-0.0435015	0.53558	0.862323
YBL018C	POP8	0.590868	0.00445434	0.0194609	FALSE	0.00579178	0.783521	0.747754
YBL019W	APN2	0.0998394	0.584727	0.752933	FALSE	0.0828127	1.09756	0.607476
YBL020W	RFT1	0.0321734	0.828623	0.907303	FALSE	0.0569069	0.489164	0.882154
YBL021C	HAP3	0.190371	0.108123	0.246932	FALSE	0.0313664	0.378987	0.92829
YBL023C	MCM2	0.0770104	0.621484	0.779377	FALSE	0.00291001	0.359746	0.936096
YBL024W	NCL1	0.213277	0.0487463	0.134174	FALSE	-0.0643465	1.72501	0.330732
YBL028C	YBL028C	0.193559	0.0171855	0.0599819	FALSE
YBL029C-A	YBL029C-A	-0.315378	3.56583e-06	2.83761e-05	FALSE
YBL030C	PET9	-0.0201508	0.681822	0.81988	FALSE	-0.0420845	5.833	0.00141343
YBL031W	SHE1	-0.0201508	0.681822	0.81988	FALSE	-0.00870049	1.17903	0.571951
YBL033C	RIB1	0.228363	0.215906	0.396289	FALSE	0.0109309	1.27554	0.530433
YBL034C	STU1	0.403961	0.0708013	0.178675	FALSE	0.0158304	0.513478	0.871138
YBL036C	YBL036C	0.133151	0.126746	0.276754	FALSE	0.0319304	0.581091	0.839924
YBL037W	APL3	0.0227231	0.912724	0.95709	FALSE	0.128142	3.56888	0.0273359
YBL038W	MRPL16	-0.268338	0.197488	0.372736	FALSE	-0.00804663	1.08194	0.61433
YBL039C	URA7	0.274708	7.70048e-05	0.000503201	FALSE	-0.0424313	1.54857	0.401112
YBL039C-A	YBL039C-A	0.35857	0.0432298	0.122494	FALSE
YBL039W-B	YBL039W-B	-0.13895	0.153492	0.314628	FALSE	-0.161123	3.46	0.0321665
YBL040C	ERD2	-0.182532	3.06209e-05	0.000214586	FALSE
YBL041W	PRE7	0.112452	0.0880122	0.211809	FALSE
YBL046W	PSY4	0.251314	0.264809	0.451562	FALSE	0.00571944	1.36483	0.485228
YBL047C	EDE1	0.203708	0.0155075	0.0548198	FALSE	-0.0178013	0.913904	0.692807
YBL050W	SEC17	-0.299544	7.6258e-05	0.000499232	FALSE	-0.0368793	1.1956	0.565394
YBL051C	PIN4	0.00589569	0.975511	0.987939	FALSE	-0.0605264	1.21957	0.555462
YBL052C	SAS3	-0.151581	0.520677	0.700937	FALSE	-0.0595836	1.78274	0.309742
YBL054W	TOD6	-0.479914	0.0538482	0.144865	FALSE	-0.0525617	1.07826	0.615963
YBL055C	YBL055C	-0.52739	0.00559815	0.0238939	FALSE	-0.113667	5.50297	0.00223642
YBL056W	PTC3	-0.129853	0.0640612	0.165395	FALSE
YBL057C	PTH2	-0.226776	0.00483454	0.0209848	FALSE
YBL058W	SHP1	-0.0905891	0.155072	0.31714	FALSE
YBL059C-A	CMC2	-0.113568	0.042593	0.121172	FALSE	-0.0419471	1.12814	0.593604
YBL059W	YBL059W	-0.370366	0.00537684	0.0230592	FALSE
YBL060W	YEL1	-0.124416	0.0834968	0.203265	FALSE	-0.186459	3.44014	0.0330717
YBL061C	SKT5	-0.0886385	0.505347	0.687556	FALSE	0.0420446	2.58287	0.115748
YBL062W	YBL062W	-0.0304903	0.832197	0.909525	FALSE
YBL063W	KIP1	0.148194	0.442502	0.633286	FALSE	0.135342	2.6461	0.105254
YBL064C	PRX1	-0.0815465	0.124638	0.273318	FALSE	-0.0212945	0.865649	0.712684
YBL065W	YBL065W	-0.0798274	0.133599	0.285938	FALSE
YBL067C	UBP13	0.0331532	0.817676	0.902831	FALSE	-0.0109826	0.31675	0.950256
YBL068W	PRS4	0.0116849	0.890687	0.944267	FALSE	-0.143401	4.95716	0.00335664
YBL071C	YBL071C	0.0901844	0.307985	0.497921	FALSE
YBL071W-A	KTI11	0.0901844	0.307985	0.497921	FALSE	0.0738786	3.79694	0.019979
YBL076C	ILS1	0.322819	0.116229	0.260135	FALSE	0.0439295	2.01221	0.239907
YBL078C	ATG8	-0.129487	0.257938	0.443861	FALSE	0.0375702	2.39002	0.150607
YBL079W	NUP170	-0.14367	0.40289	0.596178	FALSE	0.0387046	1.19175	0.567052
YBL082C	ALG3	-0.158431	0.13941	0.293664	FALSE
YBL083C	YBL083C	-0.164637	0.126326	0.276174	FALSE
YBL084C	CDC27	0.101901	0.570651	0.743542	FALSE	-0.0352376	0.846097	0.722313
YBL085W	BOI1	-0.00797856	0.960611	0.978897	FALSE	-0.105671	1.9243	0.266046
YBL088C	TEL1	0.017605	0.912631	0.95709	FALSE	0.0171875	0.201759	0.984382
YBL089W	AVT5	0.104977	0.5715	0.743542	FALSE	0.0826723	2.86896	0.0753466
YBL090W	MRP21	0.338773	8.01473e-06	6.08066e-05	FALSE	-0.0356243	0.874532	0.708859
YBL091C-A	SCS22	0.318563	0.145657	0.304849	FALSE	0.00422379	1.83246	0.294082
YBL101C	ECM21	-0.225203	0.0023459	0.0111135	FALSE	0.109056	2.08947	0.217868
YBL102W	SFT2	-0.086598	0.163922	0.330059	FALSE	0.0330756	1.92281	0.266416
YBL105C	PKC1	0.312354	0.129596	0.280752	FALSE	-0.0376796	1.43218	0.452069
YBL107C	MIX23	0.239265	0.0198575	0.0674281	FALSE	-0.099624	2.48222	0.133984
YBL113C	YBL113C	-31.6286	0.999914	1	FALSE	-0.0166024	0.534334	0.862975
YBR001C	NTH2	0.025654	0.875293	0.934534	FALSE	0.118502	3.86096	0.019817
YBR002C	RER2	0.205076	0.108568	0.247631	FALSE	-0.00367928	1.12922	0.592948
YBR003W	COQ1	0.118875	0.437096	0.628358	FALSE	-0.0965885	1.62362	0.374408
YBR004C	GPI18	-0.105757	0.570858	0.743542	FALSE	-0.106449	3.33433	0.0394906
YBR005W	RCR1	-0.0123901	0.900005	0.949872	FALSE	0.0458525	2.49722	0.131138
YBR006W	UGA2	0.297229	0.033152	0.100353	FALSE	0.0243851	1.48982	0.425348
YBR008C	FLR1	-0.106571	0.491443	0.673243	FALSE	-0.158284	3.5794	0.0270462
YBR009C	HHF1	0.349357	2.04855e-31	6.98655e-30	TRUE
YBR011C	IPP1	0.258235	0.00369542	0.0164798	FALSE	-0.013596	2.39739	0.149589
YBR012C	YBR012C	1.01469	1.09189e-11	1.48671e-10	FALSE
YBR014C	GRX7	-0.0684007	0.41595	0.607869	FALSE
YBR015C	MNN2	0.0447065	0.801064	0.895502	FALSE	-0.00291603	0.571271	0.844758
YBR016W	YBR016W	-0.304919	0.00574349	0.0243979	FALSE	-0.0983551	12.1594	0
YBR017C	KAP104	-0.00887347	0.942075	0.968304	FALSE	0.0051716	2.03994	0.230482
YBR022W	POA1	-0.317519	0.0181076	0.06259	FALSE	0.0238602	3.00766	0.0595537
YBR023C	CHS3	0.0372538	0.79748	0.893267	FALSE	-0.0155821	0.677565	0.796514
YBR024W	SCO2	-0.387157	0.0369923	0.109068	FALSE
YBR025C	OLA1	-0.221831	0.000328742	0.00190489	FALSE
YBR026C	ETR1	-0.169118	0.119476	0.265576	FALSE
YBR031W	RPL4A	-0.985494	1.32558e-169	3.95574e-167	FALSE	0.11944	69.7316	0
YBR033W	EDS1	-0.182322	0.425672	0.617138	FALSE	0.152163	2.25593	0.17714
YBR035C	PDX3	-0.0322284	0.487762	0.670766	FALSE
YBR037C	SCO1	-0.0358812	0.741755	0.858118	FALSE	-0.44831	21.6825	0
YBR038W	CHS2	-0.268336	0.0116426	0.0430258	FALSE	0.0138783	1.41088	0.462524
YBR042C	CST26	0.0148875	0.870889	0.932611	FALSE	0.0386531	0.701546	0.786901
YBR043C	QDR3	-0.212136	0.153396	0.314611	FALSE	-0.0133907	0.688441	0.792662
YBR046C	ZTA1	-0.408952	0.0190669	0.0652137	FALSE	-0.350309	10.5267	0.000609756
YBR049C	REB1	0.0852528	0.413066	0.605638	FALSE	-0.0212349	1.5808	0.389447
YBR053C	YBR053C	-0.0526348	0.60758	0.769325	FALSE
YBR054W	YRO2	-0.163844	0.0370522	0.109115	FALSE	-0.114564	1.6503	0.363535
YBR055C	PRP6	0.0149582	0.928963	0.961884	FALSE	-0.0042063	0.2215	0.979181
YBR056W-A	YBR056W-A	-0.297133	0.0329325	0.0998572	FALSE	0.106083	2.28513	0.170649
YBR057C	MUM2	-0.418526	0.0426014	0.121172	FALSE	-0.0517304	0.922122	0.68889
YBR058C	UBP14	0.885899	5.50567e-07	4.89226e-06	FALSE	0.276452	10.2399	0.000609756
YBR058C-A	TSC3	0.122679	0.00654772	0.0270131	FALSE	0.00107657	0.564526	0.847686
YBR059C	AKL1	-0.198652	0.174885	0.342407	FALSE
YBR061C	TRM7	-0.282859	0.0310578	0.0951394	FALSE	-0.0126818	1.11195	0.602211
YBR062C	YBR062C	0.0282701	0.778797	0.87977	FALSE	0.0256907	2.32496	0.161331
YBR070C	ALG14	0.0659864	0.544578	0.722319	FALSE
YBR071W	YBR071W	0.0550609	0.773868	0.875307	FALSE
YBR074W	PFF1	-0.106771	0.420322	0.61161	FALSE	0.0567368	3.02261	0.0581495
YBR076C-A	YBR076C-A	0.746085	1.01144e-05	7.62517e-05	FALSE	0.215853	4.69076	0.005
YBR076W	ECM8	0.655902	0.000576377	0.00315597	FALSE
YBR078W	ECM33	0.213835	0.000855533	0.00452048	FALSE	0.0818502	9.179	0.000609756
YBR079C	RPG1	-0.101135	0.276141	0.464254	FALSE	-0.00216549	0.0783078	0.998538
YBR082C	UBC4	0.267599	2.35109e-11	3.15328e-10	TRUE	-0.010492	0.423517	0.91024
YBR084C-A	RPL19A	-0.536326	0.00121363	0.00612115	FALSE	0.00297209	0.817569	0.733798
YBR085C-A	YBR085C-A	0.472521	0.022128	0.0733708	FALSE	-0.0118421	1.93005	0.26462
YBR086C	IST2	0.174933	0.0823003	0.201723	FALSE	0.00520313	1.21515	0.557118
YBR087W	RFC5	-0.0108633	0.925503	0.961687	FALSE	-0.00967005	1.50034	0.422007
YBR089C-A	NHP6B	0.516874	1.19327e-52	6.4744e-51	FALSE
YBR090C	YBR090C	0.393374	2.18128e-18	4.33953e-17	FALSE
YBR092C	PHO3	0.218629	0.0689561	0.17451	FALSE	0.523314	44.8172	0
YBR095C	RXT2	-0.19803	0.195338	0.369231	FALSE	-0.0104668	1.16586	0.577782
YBR096W	YBR096W	-0.147066	0.0126574	0.0460165	FALSE	-0.0142532	0.445561	0.901845
YBR101C	FES1	0.266801	0.168891	0.335812	FALSE	-0.0345529	0.777031	0.750534
YBR103C-A	YBR103C-A	0.0734276	0.58802	0.755543	FALSE
YBR103W	SIF2	0.0801855	0.547091	0.723831	FALSE	-0.0195044	0.229528	0.977655
YBR104W	YMC2	0.148474	0.214221	0.393802	FALSE	0.0517864	1.2504	0.543036
YBR105C	VID24	-0.251405	0.257544	0.443823	FALSE	-0.0653326	1.60838	0.379526
YBR106W	PHO88	0.243009	1.43829e-13	2.19171e-12	FALSE
YBR107C	IML3	-0.615512	0.000485365	0.0026989	FALSE	-0.345597	3.11465	0.0507279
YBR108W	AIM3	0.250169	0.033818	0.101852	FALSE	0.146056	1.61921	0.376029
YBR110W	ALG1	0.0490433	0.6392	0.792411	FALSE	0.00552984	0.791645	0.7445
YBR111W-A	SUS1	-0.0647496	0.403477	0.5968	FALSE
YBR112C	CYC8	-0.00961814	0.932223	0.963318	FALSE
YBR113W	YBR113W	0.264535	0.181825	0.351384	FALSE
YBR114W	RAD16	0.0851626	0.485115	0.669466	FALSE
YBR115C	LYS2	-0.287836	0.000137981	0.000854859	FALSE
YBR119W	MUD1	-0.120862	0.392212	0.586547	FALSE	-0.158922	3.61761	0.0256271
YBR120C	CBP6	-0.1722	0.00962113	0.036809	FALSE	-0.0662031	1.13134	0.591905
YBR121C	GRS1	-0.0172798	0.78805	0.886309	FALSE	0.0321544	3.75338	0.0211831
YBR122C	MRPL36	0.0214121	0.776268	0.877467	FALSE	-0.00433977	0.319043	0.949767
YBR126C	TPS1	-0.0425065	0.433425	0.625807	FALSE	-0.141834	17.7525	0
YBR126W-A	MEO1	1.74847	1.48878e-276	1.33283e-273	FALSE	0.786389	49.6105	0
YBR126W-B	YBR126W-B	1.74847	1.48878e-276	1.33283e-273	FALSE	1.21988	34.2588	0
YBR127C	VMA2	0.649409	1.04782e-58	6.42958e-57	FALSE	0.121394	19.1235	0
YBR128C	ATG14	-0.027077	0.904222	0.952358	FALSE
YBR129C	OPY1	0.30592	0.00815013	0.0320721	FALSE
YBR130C	SHE3	-0.173718	0.146546	0.305941	FALSE
YBR131W	CCZ1	-0.331357	0.180983	0.350014	FALSE
YBR133C	HSL7	-0.18741	0.312677	0.503234	FALSE	0.0156659	0.387561	0.924944
YBR135W	CKS1	-0.0774301	0.413019	0.605638	FALSE	-0.117927	6.51878	0.000821355
YBR137W	YBR137W	0.00425183	0.956149	0.977362	FALSE	0.154085	9.18491	0.000609756
YBR138C	YBR138C	0.471718	0.0140558	0.0503338	FALSE	0.0708053	0.633425	0.816642
YBR139W	YBR139W	-0.198553	0.00377837	0.0168079	FALSE
YBR140C	IRA1	-0.046988	0.612816	0.773526	FALSE
YBR141C	BMT2	0.0672691	0.630976	0.786469	FALSE	0.077339	0.514508	0.870735
YBR142W	MAK5	-0.052842	0.815417	0.902831	FALSE	0.0363603	0.750102	0.763126
YBR145W	ADH5	0.00243428	0.987473	0.995101	FALSE
YBR146W	MRPS9	0.0535843	0.514637	0.695298	FALSE	0.0257807	1.08523	0.61331
YBR147W	RTC2	0.210908	0.1149	0.257966	FALSE	0.420208	25.7285	0
YBR149W	ARA1	0.128105	0.00308346	0.014102	FALSE	0.0653931	5.36595	0.00280374
YBR150C	TBS1	-0.0852657	0.133301	0.285839	FALSE	0.376124	17.3105	0
YBR151W	APD1	-0.122917	0.0659285	0.168756	FALSE
YBR153W	RIB7	0.150643	0.14945	0.309236	FALSE	-0.0273169	2.61121	0.110883
YBR154C	RPB5	0.0297896	0.761606	0.866088	FALSE	0.0188961	1.62791	0.37278
YBR155W	CNS1	0.0889237	0.470177	0.656671	FALSE	-0.0224851	1.38131	0.477366
YBR156C	SLI15	0.0824236	0.717835	0.844081	FALSE	0.102836	2.79043	0.0840072
YBR158W	AMN1	0.138448	0.462821	0.649945	FALSE
YBR159W	IFA38	0.0371148	0.565236	0.740077	FALSE
YBR160W	CDC28	0.19924	0.161493	0.326358	FALSE
YBR161W	CSH1	-0.403859	0.00113185	0.00579852	FALSE
YBR162C	TOS1	-0.418463	5.00461e-20	1.06044e-18	FALSE
YBR162W-A	YSY6	-0.118871	3.11782e-05	0.000217639	FALSE
YBR163W	EXO5	0.326672	0.124426	0.273022	FALSE	0.0838094	1.99701	0.2437
YBR166C	TYR1	-0.441135	0.00745038	0.0297434	FALSE	-0.13107	3.65279	0.0243537
YBR168W	PEX32	0.0152234	0.916615	0.958236	FALSE	-0.0605473	0.36312	0.934751
YBR169C	SSE2	-0.178903	0.217604	0.397978	FALSE	-0.236644	9.93151	0.000609756
YBR170C	NPL4	-0.314297	0.0983514	0.229743	FALSE
YBR171W	SEC66	-0.249773	8.61103e-05	0.000556608	FALSE
YBR172C	SMY2	-0.0881541	0.290917	0.4807	FALSE
YBR173C	UMP1	-0.00929878	0.837863	0.913359	FALSE
YBR175W	SWD3	-0.178326	0.160474	0.325032	FALSE
YBR176W	ECM31	-0.105159	0.081945	0.201224	FALSE	-0.124389	3.24471	0.0424025
YBR177C	EHT1	-0.0674383	0.166952	0.333811	FALSE	0.0138312	2.57974	0.116208
YBR178W	YBR178W	0.0567808	0.761332	0.866051	FALSE
YBR179C	FZO1	-0.186842	0.262648	0.449806	FALSE
YBR181C	RPS6B	0.321899	2.14372e-102	2.39896e-100	FALSE	-0.0045637	0.300143	0.955557
YBR182C	SMP1	-0.795407	1.32309e-06	1.12275e-05	FALSE	-0.666456	14.5289	0
YBR183W	YPC1	0.193639	0.0511648	0.139062	FALSE	0.120396	3.30412	0.040107
YBR185C	MBA1	0.121107	0.187964	0.359561	FALSE	0.0173459	1.33568	0.500506
YBR186W	PCH2	1.64508	1.7236e-09	1.98464e-08	FALSE
YBR188C	NTC20	-0.0522292	0.662005	0.807189	FALSE	-0.0502822	0.855822	0.717711
YBR191W-A	YBR191W-A	0.512707	0.0120246	0.0438939	FALSE	0.0393252	1.00918	0.648871
YBR192W	RIM2	0.160716	0.148024	0.307223	FALSE	0.00707623	0.228662	0.97782
YBR193C	MED8	0.164774	0.13174	0.283681	FALSE	-0.0598386	0.38376	0.926416
YBR194W	AIM4	-0.447898	0.000156464	0.000964368	FALSE	-0.289903	12.4208	0
YBR195C	MSI1	0.0250395	0.884791	0.941782	FALSE	-0.0952894	1.46202	0.43805
YBR196C	PGI1	0.211769	6.02845e-09	6.56166e-08	FALSE	0.218967	108.062	0
YBR198C	TAF5	-0.40579	0.027865	0.0881488	FALSE	0.0150846	0.749279	0.763497
YBR199W	KTR4	0.130659	0.0493194	0.13489	FALSE	0.0439292	2.13234	0.208387
YBR200W	BEM1	0.18851	0.240144	0.423753	FALSE	0.0432408	0.441556	0.902979
YBR201W	DER1	0.0509206	0.666273	0.809611	FALSE
YBR202W	MCM7	-0.0626646	0.663906	0.807956	FALSE
YBR203W	COS111	-0.0784716	0.692136	0.827836	FALSE	0.174227	2.51013	0.128312
YBR204C	LDH1	-0.162676	0.265563	0.452234	FALSE	0.0712946	0.715962	0.780173
YBR207W	FTH1	0.244035	0.0628143	0.163102	FALSE	-0.0231624	1.26168	0.536527
YBR208C	DUR1,2	0.0187137	0.85771	0.924762	FALSE	-0.133962	2.67597	0.101058
YBR211C	AME1	-0.219005	0.227197	0.409046	FALSE	-0.435468	11.0654	0
YBR212W	NGR1	0.0969263	0.510214	0.691288	FALSE	0.0596309	1.57994	0.38969
YBR214W	SDS24	-0.133763	0.247796	0.432436	FALSE
YBR215W	HPC2	0.242998	0.284153	0.47262	FALSE	0.0539494	0.959207	0.674426
YBR218C	PYC2	-0.10682	0.422576	0.613643	FALSE	0.0514483	1.39777	0.470074
YBR221C	PDB1	0.0602721	0.215659	0.396039	FALSE	0.00371328	0.1135	0.994717
YBR221W-A	YBR221W-A	-0.0159664	0.91725	0.958236	FALSE
YBR222C	PCS60	-0.0152533	0.920016	0.959656	FALSE	0.0639316	0.734394	0.770582
YBR225W	YBR225W	-0.287682	0.211572	0.391057	FALSE	0.0950273	0.294668	0.957411
YBR226C	YBR226C	-0.287682	0.211572	0.391057	FALSE
YBR228W	SLX1	0.345706	0.0350816	0.105039	FALSE	0.0158498	0.984017	0.662874
YBR229C	ROT2	-0.0229802	0.877517	0.935735	FALSE	-0.0390067	1.50533	0.419914
YBR230C	OM14	-0.208391	2.9741e-06	2.41502e-05	FALSE
YBR230W-A	YBR230W-A	0.150045	0.00476312	0.0206999	FALSE
YBR231C	SWC5	-0.0811756	0.544815	0.722319	FALSE
YBR233W	PBP2	0.201356	0.199124	0.374705	FALSE
YBR233W-A	DAD3	-0.413515	2.80114e-10	3.41186e-09	FALSE	-0.178192	7.48372	0.000609756
YBR234C	ARC40	-0.221768	0.000219163	0.00131903	FALSE	-0.0604223	2.92765	0.068703
YBR235W	VHC1	0.13542	0.562827	0.738003	FALSE	0.0626398	2.35587	0.156064
YBR237W	PRP5	0.255113	0.245419	0.430083	FALSE	-0.0221862	1.71483	0.33539
YBR240C	THI2	-0.0969935	0.666901	0.809703	FALSE	-0.412049	10.3893	0.000609756
YBR241C	YBR241C	-0.20999	0.186058	0.356868	FALSE
YBR242W	YBR242W	-0.223373	0.0253093	0.0818722	FALSE	0.0895761	2.63967	0.106605
YBR243C	ALG7	-0.275759	0.0025118	0.0117425	FALSE	-0.00223715	1.02943	0.639615
YBR245C	ISW1	-0.0969861	0.5301	0.708581	FALSE	-0.00607401	1.58812	0.387455
YBR246W	RRT2	-0.150976	0.296566	0.486488	FALSE	-0.26806	9.65622	0.000609756
YBR247C	ENP1	-0.248182	0.0552983	0.147339	FALSE	-0.011619	1.01613	0.64526
YBR248C	HIS7	-0.489509	0.0117282	0.0432531	FALSE	0.0275693	2.25629	0.177067
YBR252W	DUT1	-0.100314	0.269309	0.456411	FALSE	0.0347062	1.24787	0.544169
YBR253W	SRB6	-0.117621	0.343259	0.535881	FALSE	0.08052	3.6542	0.0243426
YBR254C	TRS20	-0.103692	0.376697	0.573166	FALSE	0.130541	3.47739	0.0316124
YBR255C-A	RCF3	-0.0916187	0.684973	0.822841	FALSE	0.055941	1.86101	0.287063
YBR256C	RIB5	-0.658027	1.64621e-25	4.53468e-24	FALSE	-0.284761	42.0941	0
YBR259W	YBR259W	-0.30923	0.0493344	0.13489	FALSE	-0.347329	6.22962	0.000821355
YBR260C	RGD1	-0.578166	0.00303473	0.0139325	FALSE	-0.113556	3.57623	0.0271195
YBR261C	TAE1	-0.494627	0.0217964	0.0727427	FALSE	-0.0358382	1.08623	0.612999
YBR263W	SHM1	-0.211526	0.152104	0.313216	FALSE	0.0402875	3.01768	0.0584264
YBR264C	YPT10	-0.420784	0.000703135	0.00376935	FALSE
YBR265W	TSC10	-0.217664	0.0239176	0.078218	FALSE
YBR267W	REI1	0.102566	0.270324	0.45753	FALSE	0.0365178	2.72808	0.0922729
YBR271W	EFM2	0.151602	0.433695	0.625807	FALSE	0.195871	4.52577	0.0067258
YBR272C	HSM3	0.0158364	0.935269	0.964505	FALSE	-0.0242809	0.406966	0.916949
YBR273C	UBX7	-0.150443	0.263843	0.450558	FALSE	0.078509	3.32406	0.0398829
YBR274W	CHK1	0.0564373	0.810514	0.901103	FALSE	-0.0241756	0.291136	0.958602
YBR275C	RIF1	0.059736	0.770486	0.872584	FALSE	-0.211888	6.06344	0.00141343
YBR276C	PPS1	-0.601253	0.00368284	0.0164442	FALSE	-0.113109	1.89358	0.276033
YBR278W	DPB3	-0.420253	0.000402003	0.00229076	FALSE	-0.22807	10.2847	0.000609756
YBR279W	PAF1	-0.353574	0.0537646	0.14476	FALSE	-0.0879977	2.07103	0.222333
YBR280C	SAF1	-0.177926	0.255744	0.441997	FALSE	-0.0545891	0.212364	0.982068
YBR281C	DUG2	-0.479573	0.054629	0.145881	FALSE	-0.19663	6.93369	0.000821355
YBR282W	MRPL27	-0.322832	0.00126642	0.00636947	FALSE	-0.0950101	2.77923	0.0853351
YBR283C	SSH1	-0.0042048	0.939252	0.967624	FALSE	0.020514	1.21807	0.556023
YBR287W	YBR287W	-0.147802	0.0251483	0.0815074	FALSE	0.110037	8.25208	0.000609756
YBR288C	APM3	-0.143032	0.232693	0.415087	FALSE	0.00761345	1.40879	0.463677
YBR289W	SNF5	-0.197774	0.344455	0.537236	FALSE	-0.0529721	1.83541	0.293644
YBR290W	BSD2	-0.0600986	0.491051	0.673243	FALSE	0.0770991	3.31667	0.0400357
YBR291C	CTP1	-0.00160216	0.980305	0.99026	FALSE	-0.0478684	4.69638	0.005
YBR293W	VBA2	0.572876	0.00129529	0.00649641	FALSE	1.56729	458.434	0
YBR294W	SUL1	-0.301319	0.148078	0.307223	FALSE	-0.0454256	5.45558	0.00253165
YBR298C	MAL31	-0.0495404	0.711721	0.841846	FALSE	-0.0752109	0.873079	0.709307
YCL005W	LDB16	-0.016176	0.910486	0.955304	FALSE	0.0188158	0.470268	0.890104
YCL009C	ILV6	0.00387899	0.977808	0.989187	FALSE
YCL012C	YCL012C	0.597565	5.04183e-05	0.000341301	FALSE	-0.0540896	1.7519	0.319119
YCL016C	DCC1	0.157999	0.394219	0.588485	FALSE	-0.0664236	1.17597	0.573307
YCL017C	NFS1	0.107031	0.435007	0.626584	FALSE	-0.00420931	0.281004	0.961594
YCL018W	LEU2	0.0548142	0.324704	0.516097	FALSE	-0.075065	3.38879	0.0354149
YCL030C	HIS4	0.197039	0.000105042	0.00066341	FALSE	-0.173883	25.3376	0
YCL033C	MXR2	0.152722	0.163703	0.329893	FALSE	0.179548	5.34741	0.00280374
YCL034W	LSB5	0.108414	0.338846	0.532664	FALSE	0.631777	75.278	0
YCL035C	GRX1	0.0248927	0.594011	0.759982	FALSE	-0.0148978	1.15318	0.582102
YCL036W	GFD2	-0.100471	0.555223	0.730707	FALSE	0.264203	2.77728	0.0854555
YCL037C	SRO9	0.241082	0.160145	0.324569	FALSE
YCL038C	ATG22	-0.318964	0.0453395	0.126674	FALSE
YCL039W	GID7	0.28089	0.210501	0.390113	FALSE
YCL047C	POF1	-0.0719446	0.552703	0.72885	FALSE	0.16085	3.74762	0.0213988
YCL049C	YCL049C	2.08016	2.85184e-20	6.15207e-19	FALSE	0.76995	88.1893	0
YCL050C	APA1	-0.405295	9.48731e-07	8.16684e-06	FALSE	-0.0598099	1.95452	0.258063
YCL051W	LRE1	-0.0190331	0.929259	0.961884	FALSE	-0.0931697	0.732957	0.771343
YCL052C	PBN1	-0.106743	0.211836	0.391057	FALSE
YCL056C	PEX34	0.0875826	0.383841	0.57892	FALSE
YCL057C-A	MIC10	-0.0274816	0.412643	0.605638	FALSE
YCL058C	FYV5	0.00969259	0.967937	0.984152	FALSE
YCL059C	KRR1	-0.0566453	0.677383	0.817839	FALSE	-0.0222313	1.08496	0.613394
YCR002C	CDC10	0.379254	0.000429137	0.00241626	FALSE	0.0161993	1.16041	0.580187
YCR004C	YCP4	0.0334674	0.536961	0.715615	FALSE	-0.0691043	2.77876	0.0853639
YCR005C	CIT2	-0.0977154	0.110599	0.250661	FALSE	-0.01827	0.610292	0.828607
YCR008W	SAT4	0.0213613	0.854886	0.923483	FALSE	-0.0817969	0.39368	0.92224
YCR009C	RVS161	0.083819	0.14605	0.305493	FALSE	-0.0813835	3.23676	0.0432221
YCR011C	ADP1	-0.384831	0.000995184	0.00517236	FALSE	-0.0934278	2.823	0.0794552
YCR013C	YCR013C	0.262364	0.279977	0.468988	FALSE	0.0674461	2.05185	0.227745
YCR017C	CWH43	0.0796086	0.553472	0.729207	FALSE	-0.00945125	0.28009	0.961859
YCR018C-A	YCR018C-A	-1.71075	3.05232e-20	6.54511e-19	FALSE	0.0231201	0.892989	0.701124
YCR019W	MAK32	-0.202274	0.178817	0.347937	FALSE	0.346843	6.48025	0.000821355
YCR020C	PET18	-0.116152	0.284935	0.473261	FALSE	0.346392	22.2141	0
YCR020C-A	MAK31	-0.0705024	0.257732	0.443861	FALSE
YCR023C	YCR023C	-0.0253571	0.856456	0.924064	FALSE	0.287528	8.31177	0.000609756
YCR024C-A	PMP1	-0.0138373	0.793921	0.890116	FALSE	0.660788	137.889	0
YCR026C	NPP1	-0.322312	0.0245542	0.0799352	FALSE
YCR027C	RHB1	-0.313218	0.0303219	0.0935252	FALSE
YCR028C	FEN2	0.364385	0.010528	0.0395186	FALSE
YCR030C	SYP1	-0.24196	0.0186375	0.0641124	FALSE	0.353508	14.1005	0
YCR031C	RPS14A	0.439367	0.0650251	0.166921	FALSE	0.0149388	1.3733	0.481377
YCR032W	BPH1	-0.344407	0.149837	0.309616	FALSE	0.150551	2.07096	0.222349
YCR033W	SNT1	-0.586717	0.000428936	0.00241626	FALSE	0.175662	6.76621	0.000821355
YCR042C	TAF2	0.0649433	0.732313	0.852817	FALSE	0.497191	33.9905	0
YCR043C	YCR043C	-0.160273	0.0073621	0.0294566	FALSE	0.220951	24.4772	0
YCR046C	IMG1	-0.0895005	0.0963532	0.22745	FALSE	0.376039	46.1462	0
YCR050C	YCR050C	-0.020728	0.921213	0.960088	FALSE
YCR054C	CTR86	-0.362773	0.120256	0.266848	FALSE	-0.0268048	0.570553	0.845134
YCR057C	PWP2	-0.545647	0.000904683	0.00475025	FALSE	0.100157	2.45839	0.137647
YCR059C	YIH1	-0.0171761	0.865544	0.929132	FALSE	0.0748141	2.49553	0.131432
YCR060W	TAH1	-1.01706	1.08722e-29	3.47619e-28	FALSE	-0.391121	12.9333	0
YCR067C	SED4	-0.0676151	0.651923	0.801295	FALSE	0.0821767	1.05289	0.62869
YCR073C	SSK22	0.506795	0.0385183	0.112783	FALSE	-0.144414	2.63641	0.107221
YCR075C	ERS1	0.145771	0.20591	0.384044	FALSE	0.151985	3.25996	0.0415431
YCR076C	FUB1	0.26565	0.0520267	0.140716	FALSE	-0.209345	7.04819	0.000821355
YCR083W	TRX3	0.170828	0.422085	0.613179	FALSE	0.0663656	1.34728	0.493541
YCR084C	TUP1	0.720741	2.4722e-10	3.04225e-09	FALSE	-0.495123	32.403	0
YCR087C-A	YCR087C-A	-0.132936	0.165733	0.332115	FALSE	-0.0526205	1.6382	0.368905
YCR087W	YCR087W	-0.132936	0.165733	0.332115	FALSE	-0.102756	3.21702	0.044707
YCR090C	YCR090C	-0.106698	0.205809	0.384044	FALSE	-0.0379923	2.38246	0.151639
YCR092C	MSH3	-0.186187	0.245553	0.430083	FALSE	-0.237959	5.24589	0.00301205
YCR094W	CDC50	0.67873	0.000112173	0.000702259	FALSE
YCR095C	OCA4	-0.0804851	0.471035	0.657613	FALSE	0.00860723	0.674712	0.797929
YCR097W	HMRA1	6.26798	1.66396e-33	6.33898e-32	FALSE	0.0279242	2.50428	0.129662
YCR102C	YCR102C	1.31219	1.31244e-05	9.77101e-05	FALSE	0.327052	5.57202	0.00201681
YDL002C	NHP10	0.0344374	0.734905	0.854446	FALSE	-0.18953	6.1274	0.00116621
YDL003W	MCD1	0.0215637	0.885238	0.941782	FALSE	-0.0208364	0.257977	0.968663
YDL004W	ATP16	-0.175596	0.131183	0.282991	FALSE
YDL005C	MED2	-0.0514203	0.644247	0.795808	FALSE	-0.0401741	0.856613	0.717356
YDL008W	APC11	-0.0551848	0.571414	0.743542	FALSE	-0.0975871	3.53782	0.0287082
YDL009C	YDL009C	0.0103891	0.923943	0.961255	FALSE
YDL010W	GRX6	0.0344406	0.734722	0.854446	FALSE	0.0309208	2.31795	0.162958
YDL013W	SLX5	0.141389	0.48211	0.666835	FALSE
YDL015C	TSC13	-0.113354	0.0101039	0.0381267	FALSE	-0.0749057	3.50138	0.0306806
YDL018C	ERP3	0.041072	0.678569	0.818718	FALSE	-0.160324	7.21274	0.000609756
YDL020C	RPN4	0.218291	0.102422	0.236334	FALSE	-0.0196974	1.19062	0.567537
YDL025C	RTK1	0.183939	0.0683285	0.173535	FALSE	0.0940066	1.80202	0.303338
YDL025W-A	YDL025W-A	0.224661	0.24101	0.424734	FALSE
YDL027C	MRX9	-0.160088	0.167864	0.334511	FALSE	-0.151008	6.17385	0.00107914
YDL029W	ARP2	0.117638	0.189554	0.361059	FALSE
YDL030W	PRP9	0.466866	0.00731051	0.0293157	FALSE	0.0103545	0.459493	0.895805
YDL031W	DBP10	-0.248737	0.146906	0.306032	FALSE	-0.009586	0.301566	0.955
YDL035C	GPR1	-0.0872412	0.607769	0.769325	FALSE	-0.063706	1.6779	0.352367
YDL036C	PUS9	0.248022	0.192099	0.363971	FALSE	0.454204	15.6489	0
YDL040C	NAT1	0.318996	0.0830479	0.20258	FALSE	0.116918	4.70272	0.005
YDL043C	PRP11	0.206383	0.278904	0.4681	FALSE	0.0423262	2.38498	0.151294
YDL045C	FAD1	0.110717	0.383921	0.57892	FALSE	-0.0224774	1.68072	0.351535
YDL045W-A	MRP10	-0.26443	7.42863e-05	0.000488109	FALSE	-0.123473	4.84596	0.0041878
YDL046W	NPC2	0.0997372	0.0387528	0.113285	FALSE
YDL047W	SIT4	0.0286211	0.771309	0.872964	FALSE
YDL048C	STP4	-0.150608	0.282435	0.471075	FALSE
YDL049C	KNH1	-0.180294	0.109198	0.248437	FALSE	0.0129814	2.29969	0.166951
YDL052C	SLC1	-0.1691	0.0469019	0.130097	FALSE
YDL053C	PBP4	-0.0132381	0.843451	0.916661	FALSE	-0.0216126	1.54729	0.401576
YDL054C	MCH1	-0.409828	0.0117703	0.0433635	FALSE	0.0827831	2.35106	0.156853
YDL055C	PSA1	0.226586	3.66443e-06	2.90961e-05	FALSE	0.120441	24.943	0
YDL056W	MBP1	0.21695	1.56713e-05	0.000115234	FALSE	0.0692051	1.59482	0.384987
YDL059C	RAD59	0.00061019	0.995479	0.999183	FALSE	-0.0594428	1.96874	0.253475
YDL060W	TSR1	0.35236	0.0137042	0.0493213	FALSE	0.0499683	1.97558	0.251371
YDL065C	PEX19	0.267035	0.0320661	0.0974777	FALSE	0.0415406	1.8063	0.30241
YDL067C	COX9	-0.143284	1.51811e-12	2.20095e-11	FALSE	0.0511038	5.12644	0.00301205
YDL069C	CBS1	0.251822	0.0602663	0.157759	FALSE	-0.00689319	2.0379	0.231188
YDL070W	BDF2	0.243733	0.0556398	0.148138	FALSE	-0.0633326	1.42953	0.453047
YDL073W	AHK1	-0.59654	0.0105745	0.0396103	FALSE	-0.115738	2.38462	0.151344
YDL074C	BRE1	0.0129433	0.927218	0.961855	FALSE	-0.0172643	0.387359	0.925022
YDL076C	RXT3	0.0518345	0.598236	0.762378	FALSE	-0.058035	5.46727	0.00253165
YDL077C	VAM6	0.130021	0.491846	0.673537	FALSE	0.0485577	1.761	0.31681
YDL078C	MDH3	-0.101145	0.353547	0.546654	FALSE
YDL079C	MRK1	0.022981	0.918595	0.958756	FALSE
YDL081C	RPP1A	0.172643	2.73067e-10	3.33738e-09	FALSE	0.00682273	0.951055	0.677052
YDL082W	RPL13A	0.388108	4.46642e-16	7.7642e-15	FALSE
YDL084W	SUB2	0.0408332	0.234253	0.416439	FALSE	0.0248885	3.17509	0.0466346
YDL085C-A	YDL085C-A	-0.0939641	0.238104	0.421412	FALSE
YDL086W	YDL086W	0.243176	0.0059039	0.0249609	FALSE
YDL088C	ASM4	-0.0439477	0.665144	0.808733	FALSE	-0.0696304	2.52591	0.125135
YDL089W	NUR1	-0.015145	0.908339	0.954136	FALSE	-0.215662	7.33386	0.000609756
YDL090C	RAM1	-0.207759	0.242486	0.426446	FALSE	-0.125374	1.89357	0.276038
YDL092W	SRP14	0.385662	0.082746	0.202071	FALSE	-0.0406981	2.35901	0.15555
YDL093W	PMT5	0.310813	0.120489	0.266925	FALSE	-0.0288548	0.907504	0.695336
YDL095W	PMT1	0.118179	0.123952	0.272481	FALSE	-0.106058	7.77696	0.000609756
YDL100C	GET3	-0.0220245	0.736613	0.855599	FALSE	-0.00300059	1.13989	0.588303
YDL101C	DUN1	-0.194606	0.157737	0.321141	FALSE	-0.0583265	1.14023	0.588131
YDL103C	QRI1	0.0612434	0.55452	0.730319	FALSE	0.231842	15.6124	0
YDL104C	QRI7	0.0576546	0.801527	0.895502	FALSE	-0.00497063	1.05459	0.627957
YDL106C	PHO2	0.245262	0.21876	0.399501	FALSE	0.127214	2.69015	0.0983089
YDL107W	MSS2	0.066284	0.736198	0.855599	FALSE	-0.107791	1.21947	0.555501
YDL110C	TMA17	0.0961931	0.250364	0.436293	FALSE	-0.0232531	1.68294	0.350495
YDL111C	RRP42	-0.0105784	0.92355	0.961126	FALSE	0.0121705	1.78413	0.30928
YDL112W	TRM3	0.533726	0.00366504	0.0164048	FALSE	0.000583165	0.546445	0.856174
YDL113C	ATG20	-0.0699741	0.696626	0.831538	FALSE	-0.0168917	1.00443	0.651453
YDL115C	IWR1	-0.181523	0.130123	0.281554	FALSE	-0.145137	4.31957	0.00993939
YDL116W	NUP84	0.203498	0.121763	0.268659	FALSE	0.0561251	3.68379	0.0231242
YDL117W	CYK3	0.0915565	0.596696	0.760958	FALSE
YDL119C	HEM25	-0.0329545	0.855582	0.923678	FALSE	0.0583676	0.472445	0.889204
YDL120W	YFH1	0.268317	0.000100098	0.00063668	FALSE	0.151619	5.28041	0.00300347
YDL121C	YDL121C	0.0621939	0.220074	0.400577	FALSE
YDL122W	UBP1	0.176931	0.467435	0.654273	FALSE
YDL123W	SNA4	-0.0232674	0.8346	0.911189	FALSE
YDL124W	YDL124W	-0.544326	1.41901e-14	2.23853e-13	FALSE
YDL126C	CDC48	-0.0259482	0.583065	0.752081	FALSE	0.00510372	1.50479	0.420142
YDL128W	VCX1	-0.102193	0.188424	0.360056	FALSE	-0.142884	15.5999	0
YDL130W	RPP1B	-0.452948	9.73228e-150	2.32342e-147	TRUE	-0.00463071	1.19137	0.567217
YDL130W-A	STF1	-0.0462558	0.381724	0.577089	FALSE	-0.0363838	1.84492	0.291642
YDL131W	LYS21	0.0265845	0.775379	0.876739	FALSE	-0.114808	20.3599	0
YDL133C-A	RPL41B	0.478236	9.67826e-08	9.4179e-07	FALSE	-0.00807176	1.03446	0.637217
YDL135C	RDI1	-0.0946431	0.230019	0.412054	FALSE
YDL136W	RPL35B	0.00237332	0.955572	0.977362	FALSE
YDL138W	RGT2	0.653351	0.000996782	0.00517315	FALSE	0.221007	8.10516	0.000609756
YDL139C	SCM3	-0.368432	0.0960782	0.2271	FALSE
YDL140C	RPO21	0.141297	0.0726399	0.182032	FALSE	0.0563093	2.37945	0.152077
YDL141W	BPL1	0.0874218	0.384438	0.57892	FALSE	-0.00183711	0.748498	0.763843
YDL142C	CRD1	0.0236199	0.880457	0.937546	FALSE	0.0587716	1.02022	0.64318
YDL143W	CCT4	-0.0956643	0.106395	0.243919	FALSE	-0.0137224	1.57426	0.392249
YDL144C	YDL144C	0.132188	0.203068	0.379929	FALSE	0.00366413	1.1716	0.575245
YDL145C	COP1	0.11525	0.219516	0.399899	FALSE	-0.0124072	2.16345	0.200393
YDL146W	LDB17	0.18441	0.420059	0.611477	FALSE	0.112381	1.73704	0.324583
YDL147W	RPN5	-0.0475331	0.673797	0.815157	FALSE	-0.0693052	5.36185	0.00280374
YDL148C	NOP14	-0.100794	0.503275	0.684998	FALSE	-0.0720125	1.18644	0.569127
YDL149W	ATG9	-0.0215062	0.917413	0.958236	FALSE	0.0659738	0.451019	0.900075
YDL153C	SAS10	0.113341	0.589192	0.756236	FALSE	-0.0804802	2.6436	0.105782
YDL155W	CLB3	0.259017	0.0749701	0.186695	FALSE	0.020502	0.936635	0.681774
YDL157C	YDL157C	-0.654429	1.67141e-34	6.43584e-33	FALSE	-0.272613	44.2452	0
YDL158C	YDL158C	-0.084434	0.376753	0.573166	FALSE
YDL159W	STE7	-0.0702699	0.460314	0.64897	FALSE	0.0049076	1.22308	0.554222
YDL160C	DHH1	0.078855	0.726193	0.848908	FALSE
YDL164C	CDC9	-0.0228675	0.887834	0.942894	FALSE	0.0382733	0.862001	0.714719
YDL166C	FAP7	-0.294324	0.00362649	0.0163109	FALSE	-0.0396389	1.22962	0.551934
YDL168W	SFA1	-0.215925	0.00807939	0.0318989	FALSE	-0.325669	19.7463	0
YDL169C	UGX2	0.115523	0.303101	0.495167	FALSE
YDL170W	UGA3	0.0537297	0.665324	0.808733	FALSE
YDL171C	GLT1	0.183854	2.11267e-05	0.000151309	FALSE	0.0139572	0.95071	0.677163
YDL174C	DLD1	-0.0377833	0.748622	0.860504	FALSE	-0.0453364	2.5201	0.126198
YDL175C	AIR2	-0.555727	0.011895	0.0435544	FALSE	0.0295753	1.94019	0.262207
YDL177C	YDL177C	-0.401507	0.00412357	0.0181673	FALSE	-0.153558	3.19927	0.045986
YDL178W	DLD2	-0.280688	0.00636657	0.0263702	FALSE	-0.0962604	4.00334	0.0159378
YDL179W	PCL9	-0.149428	0.224689	0.405754	FALSE
YDL180W	YDL180W	0.0908489	0.498579	0.680675	FALSE
YDL181W	INH1	0.279898	1.33306e-14	2.11226e-13	FALSE	0.12479	7.49651	0.000609756
YDL182W	LYS20	0.0686416	0.12421	0.272882	FALSE	0.0931078	15.7095	0
YDL185W	VMA1	-0.153093	0.441599	0.632294	FALSE	0.116668	14.2517	0
YDL189W	RBS1	-0.0224975	0.896649	0.948567	FALSE	-0.0178247	2.70804	0.0958449
YDL190C	UFD2	0.203624	0.142873	0.300251	FALSE	0.109029	2.31468	0.163541
YDL191W	RPL35A	0.0364504	0.00113395	0.00580098	FALSE	0.0233043	3.22135	0.0443624
YDL192W	ARF1	-0.422577	7.34287e-63	5.0567e-61	FALSE	-0.0160168	1.78029	0.310557
YDL193W	NUS1	0.10168	0.520454	0.70092	FALSE	0.0830443	2.31591	0.16332
YDL195W	SEC31	0.570931	0.0257663	0.0825305	FALSE	0.0351049	0.658238	0.806116
YDL197C	ASF2	0.292506	0.0764533	0.189467	FALSE	0.205859	9.51659	0.000609756
YDL198C	GGC1	0.0972185	0.0499745	0.136401	FALSE
YDL200C	MGT1	-0.245538	0.0963496	0.22745	FALSE	-0.060479	1.10008	0.606047
YDL201W	TRM8	0.135977	0.197662	0.372736	FALSE	-0.00515729	0.189201	0.985589
YDL202W	MRPL11	-0.0173306	0.899326	0.949436	FALSE	-0.0221269	0.129549	0.992598
YDL203C	ACK1	-0.288935	0.054552	0.145784	FALSE	-0.0441099	0.506246	0.874256
YDL204W	RTN2	0.00990445	0.955696	0.977362	FALSE	0.0435075	0.388684	0.924509
YDL206W	YDL206W	0.280687	0.0995036	0.231981	FALSE	-0.025651	1.79242	0.306468
YDL207W	GLE1	-0.0670079	0.545914	0.723508	FALSE	-0.0436361	0.929494	0.684466
YDL208W	NHP2	0.0471833	0.31635	0.507549	FALSE	-0.0156095	0.702031	0.786662
YDL209C	CWC2	-0.0654972	0.739273	0.856743	FALSE	-0.0219865	0.802043	0.738571
YDL210W	UGA4	-0.0989321	0.671577	0.812746	FALSE	-0.210214	1.33463	0.501154
YDL211C	YDL211C	-0.205374	0.287686	0.477388	FALSE
YDL212W	SHR3	-0.0656925	0.293902	0.483447	FALSE	-0.00558725	1.19556	0.565414
YDL213C	NOP6	0.303315	0.157183	0.320543	FALSE	-0.0603644	2.5704	0.117595
YDL215C	GDH2	0.0769547	0.696857	0.831538	FALSE	0.00948622	0.689601	0.792299
YDL217C	TIM22	0.158241	0.234428	0.416439	FALSE	0.58979	86.4118	0
YDL219W	DTD1	-0.433987	3.45629e-05	0.000240797	FALSE
YDL225W	SHS1	-0.401871	0.0140418	0.0503338	FALSE	-0.0291723	0.425217	0.909439
YDL226C	GCS1	-0.0136828	0.90659	0.954136	FALSE	0.028811	2.2966	0.167759
YDL231C	BRE4	-0.0130235	0.908152	0.954136	FALSE	0.0806423	2.07704	0.221052
YDL232W	OST4	0.232811	2.05044e-07	1.90223e-06	FALSE	-0.0462905	2.23025	0.183374
YDL233W	MFG1	-0.323345	0.179766	0.349069	FALSE	0.0111224	1.98129	0.249562
YDL237W	AIM6	-0.0496621	0.550328	0.726668	FALSE	-0.0407703	1.53378	0.40729
YDL240W	LRG1	0.127431	0.5669	0.740505	FALSE	0.0432799	1.18258	0.57056
YDL243C	AAD4	0.28036	0.245608	0.430083	FALSE	-0.0353746	0.583249	0.839408
YDL248W	COS7	0.202526	0.227483	0.409355	FALSE	-0.144468	1.35741	0.488421
YDR001C	NTH1	-0.150282	0.506062	0.687745	FALSE	-0.0544368	2.05849	0.224551
YDR003W	RCR2	-0.146895	0.488331	0.671033	FALSE	0.0201749	1.38275	0.476873
YDR003W-A	YDR003W-A	0.484238	0.00471603	0.0205202	FALSE	-0.00975371	1.40729	0.464555
YDR008C	YDR008C	-0.275412	0.161727	0.326606	FALSE
YDR011W	SNQ2	-0.253671	0.0399342	0.115606	FALSE	0.0598723	1.75185	0.319132
YDR012W	RPL4B	-0.457401	2.11595e-65	1.51544e-63	FALSE	-0.0296586	4.62545	0.0058522
YDR013W	PSF1	-0.17596	0.363415	0.559385	FALSE	0.00788217	0.994406	0.657293
YDR016C	DAD1	-0.280663	4.37278e-08	4.38625e-07	FALSE	0.0209003	0.846663	0.722025
YDR017C	KCS1	0.012117	0.946403	0.970523	FALSE
YDR019C	GCV1	-0.171095	0.280005	0.468988	FALSE	-0.0292482	1.30919	0.513729
YDR021W	FAL1	0.114331	0.491275	0.673243	FALSE	-0.0228319	1.80178	0.303389
YDR022C	ATG31	-0.0938973	0.438088	0.629028	FALSE	-0.0478553	1.58895	0.387232
YDR023W	SES1	-0.095215	0.257152	0.443362	FALSE	0.198388	59.3507	0
YDR024W	FYV1	-0.125163	0.220976	0.401275	FALSE	0.0275109	0.276307	0.963045
YDR028C	REG1	0.0674408	0.750533	0.860998	FALSE	-0.0524557	0.909888	0.694537
YDR031W	MIX14	0.0984745	0.00516092	0.0221864	FALSE	0.0212934	0.146656	0.990983
YDR032C	PST2	-0.145602	7.15622e-05	0.000472812	FALSE	0.028171	2.52359	0.125559
YDR033W	MRH1	0.396883	1.6937e-23	4.27121e-22	FALSE
YDR034C	LYS14	-0.22574	0.00637717	0.0263702	FALSE
YDR034W-B	YDR034W-B	0.578929	1.39381e-05	0.000103338	TRUE
YDR035W	ARO3	-0.722032	5.96892e-19	1.21447e-17	FALSE	-0.25978	17.7679	0
YDR036C	EHD3	-2.72672	2.28835e-25	6.16134e-24	FALSE	-0.573533	24.7514	0
YDR037W	KRS1	-0.485613	1.42311e-20	3.10741e-19	FALSE	-0.586186	339.646	0
YDR038C	ENA5	-2.70063	7.87437e-09	8.51907e-08	FALSE	-1.68404	82.839	0
YDR041W	RSM10	-0.0626844	0.417363	0.608789	FALSE
YDR042C	YDR042C	-0.0197781	0.827519	0.906557	FALSE
YDR043C	NRG1	0.283648	0.00606088	0.0254443	FALSE
YDR044W	HEM13	-0.0535223	0.722991	0.846919	FALSE
YDR045C	RPC11	-0.462548	3.39446e-10	4.07905e-09	FALSE
YDR047W	HEM12	0.113945	0.220435	0.400817	FALSE
YDR049W	VMS1	0.405667	0.0454438	0.12674	FALSE
YDR051C	DET1	0.167137	0.107892	0.246718	FALSE	0.0468475	1.76749	0.314706
YDR055W	PST1	-0.0332168	0.606367	0.768909	FALSE	-0.00369513	0.0990179	0.996833
YDR056C	EMC10	0.00266791	0.96716	0.983641	FALSE	0.039335	2.18211	0.195803
YDR057W	YOS9	0.381906	0.0164052	0.0577082	FALSE	-0.0522437	0.527823	0.86597
YDR060W	MAK21	0.225843	0.0441278	0.124246	FALSE	0.164982	12.6249	0
YDR061W	YDR061W	0.1519	0.49813	0.680321	FALSE	0.139532	2.478	0.134648
YDR062W	LCB2	0.238973	0.0081022	0.0319186	FALSE	0.244251	33.4273	0
YDR063W	AIM7	-0.286392	0.000123967	0.000770705	FALSE	-0.113003	7.39387	0.000609756
YDR066C	RTR2	0.0952869	0.483395	0.668354	FALSE	-0.0880078	1.86154	0.286922
YDR067C	OCA6	-0.162241	0.176885	0.345568	FALSE
YDR068W	DOS2	-0.0330979	0.743315	0.858291	FALSE	0.0534309	1.2762	0.530219
YDR069C	DOA4	0.0768296	0.699488	0.833157	FALSE	0.156829	2.13502	0.207759
YDR070C	FMP16	-0.154124	0.274102	0.461693	FALSE
YDR071C	PAA1	-0.095433	0.0819391	0.201224	FALSE
YDR072C	IPT1	-0.0520616	0.629491	0.785165	FALSE
YDR073W	SNF11	-0.0930659	0.36143	0.55692	FALSE	-0.257312	16.9747	0
YDR074W	TPS2	-0.068103	0.414315	0.606169	FALSE	-0.0529614	3.15459	0.047893
YDR075W	PPH3	0.519682	0.00151121	0.00747463	FALSE	-0.00934589	1.77586	0.311994
YDR076W	RAD55	-0.367906	0.0951643	0.225834	FALSE	-0.0802833	1.31009	0.513152
YDR077W	SED1	0.280462	9.13592e-24	2.35365e-22	FALSE	0.40147	64.7309	0
YDR078C	SHU2	0.510768	0.00637589	0.0263702	FALSE
YDR079C-A	TFB5	-0.171658	0.000988322	0.00514416	FALSE	-0.144968	8.27371	0.000609756
YDR079W	PET100	-0.132353	0.0140192	0.0503035	FALSE	-0.0403633	4.2388	0.0114695
YDR080W	VPS41	-0.151939	0.404673	0.597635	FALSE	-0.0395365	0.544207	0.857506
YDR082W	STN1	0.170063	0.390098	0.584739	FALSE	0.11792	3.33228	0.039595
YDR083W	RRP8	-0.186672	0.00489256	0.0211597	FALSE	-0.02375	2.75922	0.0882602
YDR084C	TVP23	-0.161682	0.0137675	0.0494994	FALSE
YDR085C	AFR1	-0.450817	0.010084	0.0380917	FALSE
YDR086C	SSS1	0.0353557	0.166584	0.333262	FALSE
YDR087C	RRP1	-0.334272	0.0410273	0.118102	FALSE	-0.0960026	3.48543	0.031442
YDR088C	SLU7	-0.0763817	0.715653	0.84361	FALSE	-0.0618636	0.826678	0.729638
YDR089W	VTC5	0.040993	0.804649	0.897689	FALSE
YDR092W	UBC13	-0.068802	0.390058	0.584739	FALSE
YDR093W	DNF2	0.0948596	0.637477	0.791791	FALSE
YDR094W	YDR094W	0.121061	0.567217	0.740505	FALSE
YDR095C	YDR095C	0.121061	0.567217	0.740505	FALSE
YDR098C	GRX3	-0.529308	0.00357587	0.0161315	FALSE	-0.29855	67.1922	0
YDR099W	BMH2	1.79479	5.88606e-84	5.54683e-82	FALSE	0.0218633	1.98059	0.249844
YDR100W	TVP15	0.0914145	0.180046	0.349161	FALSE	0.00319729	0.632245	0.817028
YDR109C	YDR109C	-0.027399	0.90683	0.954136	FALSE	-0.274512	9.21665	0.000609756
YDR111C	ALT2	-0.253516	0.240217	0.423753	FALSE	-0.199045	5.22307	0.00301205
YDR116C	MRPL1	-0.460525	0.00865852	0.0337024	FALSE	-0.0564393	0.761194	0.757711
YDR117C	TMA64	-0.0745567	0.643492	0.79515	FALSE	0.0511621	0.546819	0.855951
YDR119W	VBA4	0.00265101	0.985424	0.993652	FALSE	0.0647512	3.32385	0.0398888
YDR119W-A	COX26	-0.342955	0.00663341	0.0271788	FALSE
YDR121W	DPB4	0.0812008	0.542786	0.721443	FALSE	-0.115388	3.61907	0.0255766
YDR122W	KIN1	0.103991	0.461103	0.649061	FALSE
YDR123C	INO2	-0.0157475	0.929744	0.961884	FALSE
YDR126W	SWF1	0.0973367	0.582085	0.751422	FALSE	0.33239	4.27272	0.0102475
YDR128W	MTC5	0.470475	0.0281771	0.0887626	FALSE	-0.0184546	0.431368	0.906668
YDR129C	SAC6	-0.0710248	0.297027	0.486798	FALSE	-0.0275717	0.821756	0.732137
YDR130C	FIN1	0.10286	0.595877	0.760837	FALSE	-0.237114	5.44339	0.00253165
YDR132C	YDR132C	0.650588	0.00977482	0.0372379	FALSE	-0.00187297	0.755877	0.760238
YDR133C	YDR133C	-0.377655	5.22453e-35	2.07878e-33	FALSE	-0.0671397	50.8487	0
YDR135C	YCF1	-0.147271	0.212982	0.392733	FALSE	0.0647341	1.43433	0.451342
YDR137W	RGP1	0.0851625	0.593563	0.759982	FALSE	0.162847	3.29561	0.0403391
YDR139C	RUB1	0.154871	0.00241658	0.0114015	FALSE	0.108067	3.82639	0.0199653
YDR144C	MKC7	-0.514981	9.51904e-05	0.00060934	FALSE
YDR145W	TAF12	-0.255898	0.0181745	0.0627609	FALSE
YDR146C	SWI5	0.00181057	0.993357	0.998376	FALSE	-0.0108542	1.55873	0.398509
YDR147W	EKI1	0.52327	0.0165276	0.0580247	FALSE	0.0553749	1.12811	0.593625
YDR153C	ENT5	0.00926164	0.915309	0.958236	FALSE	0.0430385	1.29222	0.521892
YDR156W	RPA14	0.0914877	0.133827	0.285939	FALSE	-0.000748332	0.758897	0.758728
YDR157W	YDR157W	-0.244577	0.183288	0.353294	FALSE	-0.333247	5.47524	0.00253165
YDR161W	ACL4	-0.124377	0.266264	0.452699	FALSE	-0.0723689	1.86479	0.28606
YDR162C	NBP2	0.222189	0.0614844	0.160449	FALSE	0.0929348	2.09602	0.217111
YDR163W	CWC15	0.150837	0.189343	0.36085	FALSE	0.180887	5.45992	0.00253165
YDR164C	SEC1	0.248743	0.148033	0.307223	FALSE	0.158126	1.23133	0.551228
YDR165W	TRM82	-0.0669751	0.648526	0.799164	FALSE
YDR170C	SEC7	-0.450948	8.28989e-08	8.13318e-07	FALSE
YDR171W	HSP42	0.359681	0.00975696	0.0372094	FALSE	-0.0698079	1.11192	0.602225
YDR172W	SUP35	-0.0250006	0.855336	0.923678	FALSE	0.0793205	3.75447	0.0211278
YDR173C	ARG82	-0.121361	0.622674	0.779377	FALSE	-0.0158771	1.89626	0.27517
YDR174W	HMO1	0.00637442	0.920262	0.959656	FALSE	-0.0283033	1.50808	0.418758
YDR176W	NGG1	0.0170202	0.916345	0.958236	FALSE
YDR177W	UBC1	0.231058	0.0034672	0.0157165	FALSE	0.0595916	2.9198	0.0703906
YDR179W-A	NVJ3	-0.0211507	0.8989	0.949436	FALSE	0.230256	4.20199	0.0119115
YDR180W	SCC2	-0.124457	0.39788	0.591596	FALSE	0.000717993	0.516351	0.870014
YDR181C	SAS4	-0.104518	0.452829	0.641745	FALSE	0.0164684	0.151422	0.990384
YDR182W	CDC1	0.00702077	0.956259	0.977362	FALSE	-0.0265577	0.996072	0.656273
YDR183W	PLP1	0.245665	0.189132	0.360797	FALSE	-0.0430833	1.21134	0.558545
YDR185C	UPS3	0.737499	0.00111374	0.00571392	FALSE	-0.0384594	0.911406	0.69389
YDR186C	SND1	-0.296361	0.0841747	0.204166	FALSE	0.057656	1.87621	0.283223
YDR192C	NUP42	-0.0245856	0.914006	0.957874	FALSE	0.563538	20.3314	0
YDR194C	MSS116	-0.562791	0.0241147	0.0787189	FALSE	0.133507	5.7481	0.00201681
YDR196C	CAB5	0.0138241	0.898667	0.949436	FALSE	0.0215587	0.828406	0.728761
YDR197W	CBS2	0.299832	0.00705246	0.0286661	FALSE	0.0438866	0.769978	0.754286
YDR198C	RKM2	0.0578221	0.688749	0.825739	FALSE	0.0563664	0.586872	0.838543
YDR199W	YDR199W	-0.294239	0.16974	0.337127	FALSE
YDR200C	VPS64	-0.363154	0.0645971	0.16606	FALSE
YDR201W	SPC19	-0.0582688	0.574705	0.745913	FALSE	-0.055755	1.85523	0.288734
YDR204W	COQ4	-0.263994	0.066465	0.169887	FALSE	-0.0133286	0.626303	0.819196
YDR206W	EBS1	-0.348772	0.0104744	0.0393587	FALSE	-0.0622666	0.978625	0.665443
YDR208W	MSS4	-0.235133	0.262298	0.449712	FALSE
YDR209C	YDR209C	-0.17667	0.00851779	0.0333048	FALSE
YDR210W	YDR210W	0.0536023	0.265651	0.452234	FALSE
YDR212W	TCP1	-0.188304	0.00306917	0.0140708	FALSE	-0.0621972	3.44257	0.0328799
YDR214W	AHA1	-0.139341	0.140227	0.29521	FALSE	0.0358094	1.84281	0.292206
YDR215C	YDR215C	-0.0274963	0.857878	0.924762	FALSE
YDR222W	YDR222W	0.0503243	0.68772	0.82531	FALSE	-0.161205	2.94364	0.0667612
YDR225W	HTA1	-0.143685	0.125245	0.27448	FALSE	0.0269262	1.64647	0.365272
YDR226W	ADK1	-0.296122	3.09306e-26	8.58625e-25	FALSE	-0.0201826	3.76149	0.0208462
YDR229W	IVY1	-0.0276308	0.859543	0.925897	FALSE	-0.071026	1.98997	0.246075
YDR230W	YDR230W	-0.197957	0.0281597	0.0887626	FALSE
YDR231C	COX20	-0.20775	0.0205214	0.0691969	FALSE
YDR233C	RTN1	0.0543706	0.144774	0.303561	FALSE	-0.0271152	3.03702	0.0575896
YDR235W	PRP42	-0.104321	0.315074	0.506183	FALSE	-0.0748824	1.40985	0.463055
YDR236C	FMN1	-0.0711447	0.362902	0.558947	FALSE	0.239197	11.6576	0
YDR238C	SEC26	-0.344909	0.0167517	0.0587539	FALSE	0.0433448	1.30092	0.519186
YDR239C	YDR239C	-0.121361	0.622674	0.779377	FALSE
YDR240C	SNU56	-0.0397249	0.825688	0.905602	FALSE	-0.0763136	1.36164	0.486527
YDR242W	AMD2	-0.103184	0.611841	0.772795	FALSE	-0.357459	4.52105	0.00680142
YDR243C	PRP28	-0.158463	0.392779	0.587037	FALSE	-0.239859	4.44071	0.00724095
YDR244W	PEX5	0.00549533	0.965273	0.98228	FALSE
YDR245W	MNN10	-0.201646	0.00499647	0.0215311	FALSE
YDR246W	TRS23	0.169487	0.250372	0.436293	FALSE
YDR249C	YDR249C	0.294909	0.122346	0.26978	FALSE	-0.00598066	1.46856	0.435083
YDR257C	RKM4	0.0551833	0.750926	0.860998	FALSE	0.00894308	0.865371	0.71284
YDR258C	HSP78	0.0507875	0.813569	0.902326	FALSE	-0.0572131	1.54221	0.403415
YDR261C	EXG2	-0.223079	0.110606	0.250661	FALSE	-0.0166711	0.975043	0.667099
YDR262W	YDR262W	-0.783514	1.84176e-05	0.000134051	FALSE	-0.0229108	0.73	0.772908
YDR264C	AKR1	-0.209337	0.33683	0.530192	FALSE	0.00183784	1.51433	0.416564
YDR266C	HEL2	0.172613	0.290706	0.4807	FALSE	0.0170478	1.01919	0.64368
YDR268W	MSW1	-0.0422205	0.816991	0.902831	FALSE	-0.0877712	0.960163	0.674093
YDR276C	PMP3	-0.252514	1.76378e-40	7.99508e-39	TRUE	0.0514802	12.4945	0
YDR279W	RNH202	0.147752	0.377864	0.573952	FALSE	-0.0474174	1.7585	0.3175
YDR283C	GCN2	-0.20336	0.400645	0.593943	FALSE	-0.167936	5.83942	0.00141343
YDR284C	DPP1	-0.116237	0.0958722	0.226763	FALSE	-0.09734	4.30402	0.00993939
YDR286C	YDR286C	-0.0282186	0.742026	0.858118	FALSE	0.128984	3.63947	0.0251075
YDR287W	INM2	-0.0352712	0.788525	0.886564	FALSE
YDR288W	NSE3	-0.259485	0.0218652	0.0728365	FALSE	-0.230369	9.73391	0.000609756
YDR289C	RTT103	-0.214502	0.157836	0.321141	FALSE	-0.0483897	1.24716	0.54447
YDR291W	HRQ1	-0.0706903	0.703575	0.835655	FALSE	-0.0381512	1.62609	0.373471
YDR292C	SRP101	0.105517	0.401611	0.595023	FALSE	0.0803082	1.91857	0.267583
YDR293C	SSD1	-0.556156	0.000411794	0.00233698	FALSE
YDR294C	DPL1	-0.318979	0.114523	0.257798	FALSE
YDR295C	HDA2	0.252545	0.146143	0.30551	FALSE	-0.0186776	1.5086	0.418541
YDR296W	MHR1	-0.262624	0.000268541	0.00159742	FALSE	-0.086501	2.25591	0.177144
YDR297W	SUR2	-0.0126779	0.909221	0.954535	FALSE
YDR298C	ATP5	-0.0572421	0.0583739	0.153817	FALSE
YDR299W	BFR2	-0.115065	0.629249	0.785136	FALSE	-0.00195976	0.232115	0.977016
YDR300C	PRO1	-0.0156145	0.894706	0.947127	FALSE	-0.0168696	1.38057	0.477622
YDR302W	GPI11	-0.0100902	0.908555	0.954136	FALSE	-0.106136	4.15766	0.0126359
YDR303C	RSC3	-0.0775749	0.583435	0.752081	FALSE	-0.0554656	0.850445	0.720125
YDR305C	HNT2	-0.0116179	0.932531	0.963318	FALSE	0.202997	6.83332	0.000821355
YDR307W	PMT7	0.212187	0.184424	0.354494	FALSE	0.186059	3.6261	0.0253641
YDR309C	GIC2	0.332116	0.115392	0.258424	FALSE
YDR310C	SUM1	-0.0558133	0.718687	0.844363	FALSE	0.0635741	1.31583	0.510481
YDR311W	TFB1	0.266629	0.228652	0.411046	FALSE	0.0419099	0.825843	0.730062
YDR312W	SSF2	-0.0378409	0.844878	0.917376	FALSE	0.167141	5.2941	0.00280374
YDR313C	PIB1	-0.0974658	0.500867	0.683206	FALSE	0.118276	2.87493	0.0749647
YDR316W	OMS1	0.0507764	0.730423	0.851724	FALSE	-0.103721	2.94681	0.0664769
YDR317W	HIM1	0.241959	0.264338	0.451107	FALSE	-0.0307088	0.629249	0.818055
YDR318W	MCM21	-0.0364953	0.783455	0.883639	FALSE	-0.0235191	1.67483	0.353089
YDR319C	YFT2	0.0315017	0.790838	0.888049	FALSE	0.13151	5.66393	0.00201681
YDR320C-A	DAD4	0.261659	5.32108e-14	8.24883e-13	FALSE
YDR320W-B	YDR320W-B	0.171236	2.3495e-06	1.92972e-05	FALSE
YDR321W	ASP1	0.185624	0.0118004	0.04343	FALSE
YDR322C-A	TIM11	-0.429582	0.00506799	0.0218131	FALSE	0.0718745	6.78334	0.000821355
YDR322W	MRPL35	-0.136505	0.0716122	0.180198	FALSE	0.0365504	0.580502	0.840064
YDR324C	UTP4	-0.317235	0.0154813	0.0547813	FALSE	0.00436952	0.708226	0.783611
YDR325W	YCG1	0.101329	0.578188	0.748551	FALSE	-0.187963	4.75199	0.00459459
YDR326C	YSP2	-0.203171	0.0667782	0.170444	FALSE	-0.0669857	1.61421	0.377576
YDR329C	PEX3	-0.298524	0.00248838	0.0116788	FALSE
YDR330W	UBX5	0.00234019	0.987598	0.995101	FALSE	0.039366	2.72685	0.0924466
YDR331W	GPI8	-0.0438099	0.70202	0.834463	FALSE	-0.0294991	0.771341	0.753564
YDR333C	RQC1	-0.0911691	0.550205	0.726668	FALSE	0.0451821	0.782358	0.748149
YDR334W	SWR1	-0.257891	0.0223723	0.073907	FALSE	-0.0658504	2.43987	0.141408
YDR335W	MSN5	0.131559	0.525585	0.704813	FALSE	0.105557	3.92955	0.0187097
YDR337W	MRPS28	-0.0917145	0.339304	0.53315	FALSE	0.0115947	0.914511	0.692543
YDR339C	FCF1	0.509811	1.81872e-05	0.000132644	FALSE	-0.0605155	3.04761	0.0569535
YDR341C	YDR341C	0.0665168	0.736556	0.855599	FALSE	0.00197392	1.349	0.492527
YDR343C	HXT6	0.0410463	0.794999	0.890767	FALSE	0.128422	6.19891	0.000849336
YDR345C	HXT3	0.207071	0.0420267	0.120398	FALSE	0.0238492	1.27242	0.531448
YDR346C	SVF1	-0.114469	0.22948	0.411707	FALSE
YDR347W	MRP1	-0.0991771	0.183306	0.353294	FALSE
YDR348C	PAL1	-0.060949	0.700689	0.833696	FALSE
YDR349C	YPS7	-0.18357	0.074016	0.184963	FALSE
YDR350C	ATP22	0.243683	0.114472	0.257798	FALSE
YDR351W	SBE2	0.0413277	0.794266	0.890224	FALSE
YDR352W	YPQ2	0.0831029	0.466511	0.65359	FALSE
YDR353W	TRR1	-0.0368432	0.378797	0.574534	FALSE
YDR354W	TRP4	0.100897	0.279141	0.468199	FALSE	0.0477646	2.99994	0.0606978
YDR356W	SPC110	-0.389642	0.00599339	0.0253034	FALSE	0.00655816	0.333893	0.944615
YDR357C	CNL1	-0.199763	0.00626967	0.0260303	FALSE
YDR358W	GGA1	0.154063	0.2927	0.482181	FALSE	0.377742	25.1775	0
YDR359C	EAF1	0.201369	0.256189	0.44234	FALSE	-0.0623654	1.19219	0.566861
YDR361C	BCP1	-0.0130328	0.891767	0.944798	FALSE	-0.00102371	0.193576	0.985203
YDR362C	TFC6	-0.14364	0.391106	0.586004	FALSE	-0.174996	4.89	0.00357143
YDR363W-A	SEM1	0.0371288	0.720824	0.84521	FALSE	0.0392375	2.96847	0.0646721
YDR364C	CDC40	0.024747	0.865086	0.929132	FALSE	0.0137272	1.70833	0.338231
YDR365C	ESF1	-0.0285433	0.865564	0.929132	FALSE	-0.0261167	1.19287	0.566571
YDR367W	KEI1	-0.254513	0.0489227	0.134453	FALSE	0.0021635	1.22781	0.552568
YDR368W	YPR1	-0.158745	0.00658915	0.0270593	FALSE	0.00913891	0.513751	0.871032
YDR369C	XRS2	-0.536305	0.0176983	0.0612938	FALSE	-0.0775661	1.102	0.605476
YDR370C	DXO1	-0.29386	0.136064	0.288487	FALSE	-0.0673832	2.16772	0.199463
YDR374W-A	WIP1	-0.413754	1.9585e-13	2.95924e-12	FALSE	-0.249625	12.2611	0
YDR375C	BCS1	-0.25331	0.00488717	0.0211597	FALSE	-0.0123066	2.18747	0.193928
YDR376W	ARH1	0.0350572	0.816602	0.902831	FALSE	0.147367	3.36318	0.036946
YDR377W	ATP17	-1.07789	1.16223e-110	1.43515e-108	FALSE
YDR378C	LSM6	-0.563219	2.4799e-57	1.48009e-55	FALSE
YDR379C-A	SDH6	0.149245	0.0361986	0.107307	FALSE
YDR380W	ARO10	0.0159541	0.92992	0.961884	FALSE
YDR381C-A	YDR381C-A	-0.947435	8.60981e-27	2.48643e-25	FALSE	-0.317518	27.3133	0
YDR381W	YRA1	-0.345308	2.67841e-23	6.66068e-22	FALSE	0.0128548	0.840332	0.72525
YDR382W	RPP2B	0.639013	1.97565e-07	1.83761e-06	FALSE	5.77443e-05	0.213458	0.981695
YDR383C	NKP1	0.317408	0.00178277	0.00867405	FALSE	0.0202956	0.588953	0.838046
YDR385W	EFT2	0.217384	3.28273e-12	4.64643e-11	FALSE	-0.00316913	1.64483	0.366021
YDR386W	MUS81	-0.305055	0.0761669	0.189018	FALSE	0.0510401	0.722862	0.776853
YDR387C	CIN10	-0.301564	0.0470166	0.130315	FALSE	-0.120888	2.03259	0.23303
YDR388W	RVS167	-0.119666	0.213774	0.393586	FALSE	-0.0263594	1.50194	0.421335
YDR389W	SAC7	-0.191741	0.138676	0.292518	FALSE	-0.0852527	2.35929	0.155504
YDR390C	UBA2	0.185068	0.271439	0.457986	FALSE
YDR391C	YDR391C	0.0303256	0.753537	0.861716	FALSE
YDR392W	SPT3	0.171884	0.231505	0.41349	FALSE	0.0853626	1.67091	0.354015
YDR394W	RPT3	0.191891	0.305758	0.496112	FALSE	0.116163	6.84086	0.000821355
YDR398W	UTP5	-0.065578	0.652118	0.801295	FALSE	-0.0227163	0.230895	0.977333
YDR399W	HPT1	0.17679	8.27468e-05	0.000536805	FALSE	-0.00921227	1.85977	0.287398
YDR400W	URH1	0.246729	0.0902103	0.215794	FALSE	-0.0217727	1.30721	0.515037
YDR404C	RPB7	-0.0187662	0.786365	0.885805	FALSE	-0.0367351	1.18784	0.568608
YDR408C	ADE8	-0.64355	0.00371815	0.0165606	FALSE
YDR410C	STE14	0.137595	0.346158	0.538954	FALSE	-0.00863209	2.37577	0.152761
YDR412W	RRP17	0.0787426	0.417634	0.608937	FALSE	0.0356652	0.641748	0.813567
YDR415C	YDR415C	0.164128	0.246441	0.430794	FALSE
YDR423C	CAD1	-1.95775	2.1744e-10	2.6943e-09	FALSE	-0.868224	89.7939	0
YDR424C	DYN2	0.491259	2.34797e-19	4.88841e-18	FALSE	0.17162	12.1208	0
YDR427W	RPN9	0.041753	0.630432	0.786064	FALSE	0.0564305	2.09585	0.217128
YDR430C	CYM1	0.289935	0.0838284	0.203933	FALSE	-0.127972	3.72341	0.0223708
YDR432W	NPL3	0.0225489	0.920217	0.959656	FALSE	-0.107541	0.803749	0.738062
YDR433W	YDR433W	-0.00297681	0.989788	0.996186	FALSE	0.0480836	1.36852	0.483731
YDR434W	GPI17	0.832909	0.00187273	0.00906248	FALSE	0.220045	6.71813	0.000821355
YDR435C	PPM1	0.00968427	0.944182	0.969136	FALSE	0.0886183	1.79604	0.305184
YDR436W	PPZ2	-0.150627	0.377554	0.573863	FALSE	0.156724	1.96453	0.255048
YDR439W	LRS4	0.013578	0.930501	0.962207	FALSE	0.0447144	0.968491	0.670145
YDR440W	DOT1	-0.150804	0.480916	0.666422	FALSE	-0.0332787	0.984461	0.66266
YDR441C	APT2	-1.1969	4.91891e-15	7.9345e-14	FALSE	-0.447022	55.0584	0
YDR444W	YDR444W	0.19745	0.295873	0.486019	FALSE
YDR445C	YDR445C	0.141361	0.507821	0.689351	FALSE
YDR449C	UTP6	-0.0182329	0.845972	0.918008	FALSE	0.00887951	0.775681	0.751253
YDR451C	YHP1	0.163061	0.298742	0.488937	FALSE	-0.00936627	0.872993	0.709334
YDR452W	PPN1	-0.0843936	0.214458	0.394035	FALSE
YDR453C	TSA2	-0.187798	0.0825111	0.202071	FALSE
YDR454C	GUK1	-0.0277991	0.472764	0.6588	FALSE	0.0325162	3.06623	0.0552939
YDR456W	NHX1	0.0943351	0.615902	0.775781	FALSE	-0.0143815	0.710925	0.78234
YDR457W	TOM1	0.00101292	0.995758	0.999183	FALSE	-0.190829	10.0702	0.000609756
YDR458C	HEH2	-0.205833	0.0408197	0.117599	FALSE	0.00575632	0.595697	0.835381
YDR459C	PFA5	0.498235	0.00785043	0.0310978	FALSE	0.0550944	0.910385	0.694332
YDR460W	TFB3	-0.275521	0.0642435	0.165627	FALSE	-0.0228416	1.12809	0.593635
YDR461C-A	YDR461C-A	-0.786531	4.1839e-09	4.63856e-08	FALSE	0.0550543	0.582689	0.839542
YDR462W	MRPL28	-0.0654331	0.367888	0.564926	FALSE	0.049155	4.08897	0.0144628
YDR463W	STP1	-0.125609	0.235289	0.41732	FALSE
YDR464W	SPP41	0.131492	0.493375	0.675115	FALSE	0.0213821	1.23465	0.549793
YDR465C	RMT2	0.0484345	0.640986	0.793422	FALSE	0.149964	10.3416	0.000609756
YDR466W	PKH3	-0.129726	0.421783	0.612989	FALSE	-0.0173471	0.716929	0.779757
YDR467C	YDR467C	-0.16063	0.348666	0.541915	FALSE
YDR469W	SDC1	-0.774509	5.57366e-22	1.29606e-20	FALSE	-0.598689	68.1669	0
YDR470C	UGO1	0.00567332	0.957977	0.978079	FALSE	-0.0677543	1.21479	0.557251
YDR471W	RPL27B	0.187987	1.70873e-33	6.441e-32	FALSE	-0.0145468	1.42192	0.45695
YDR472W	TRS31	-0.0411502	0.700005	0.83335	FALSE	0.0860253	2.4624	0.136917
YDR473C	PRP3	-0.176865	0.406149	0.598035	FALSE	0.00117922	0.495559	0.879227
YDR475C	JIP4	-0.146553	0.254248	0.44005	FALSE
YDR476C	YDR476C	0.181167	0.0632991	0.1639	FALSE	0.00485753	1.64783	0.364653
YDR478W	SNM1	-0.22169	0.233186	0.415648	FALSE	-0.0378418	0.539442	0.860302
YDR482C	CWC21	-0.201875	0.0827695	0.202071	FALSE	-0.0419984	2.00908	0.240676
YDR483W	KRE2	-0.118104	0.0454325	0.12674	FALSE	-0.0120717	1.12426	0.59598
YDR484W	VPS52	-0.0116809	0.944779	0.969136	FALSE	-0.0314547	1.54545	0.402242
YDR485C	VPS72	0.209385	0.229764	0.411803	FALSE	-0.0696736	1.51672	0.415795
YDR487C	RIB3	0.543904	1.2751e-13	1.95971e-12	FALSE	0.0876592	3.58642	0.0267052
YDR489W	SLD5	0.474146	0.00229675	0.010937	FALSE	0.290016	9.82793	0.000609756
YDR490C	PKH1	0.304367	0.034489	0.103637	FALSE	0.47522	30.4403	0
YDR492W	IZH1	-0.0451883	0.785518	0.885128	FALSE
YDR493W	MZM1	0.0237686	0.780023	0.8806	FALSE	-0.0547559	1.37785	0.47896
YDR494W	RSM28	0.0674879	0.544091	0.722161	FALSE	0.0638331	1.23376	0.550178
YDR496C	PUF6	0.102096	0.60467	0.767846	FALSE	0.0271104	0.342959	0.94216
YDR497C	ITR1	0.413942	1.37719e-39	6.16464e-38	FALSE	0.204126	139.633	0
YDR498C	SEC20	0.108905	0.618189	0.777021	FALSE	-0.00457055	1.83858	0.293173
YDR502C	SAM2	0.0394055	0.102244	0.236289	FALSE	-0.0254542	2.2614	0.17599
YDR503C	LPP1	-0.0522835	0.737239	0.855764	FALSE	0.0894924	2.31174	0.164063
YDR504C	SPG3	0.28661	0.0697834	0.176355	FALSE	0.10601	1.57925	0.390003
YDR505C	PSP1	-0.223648	0.172995	0.341366	FALSE	-0.0380284	1.4349	0.451146
YDR510W	SMT3	-0.063084	0.347485	0.540314	FALSE
YDR511W	SDH7	0.0722136	0.318249	0.509454	FALSE	0.0669225	1.37349	0.481276
YDR512C	EMI1	0.0700988	0.343287	0.535881	FALSE	-0.00415382	1.54059	0.404003
YDR513W	GRX2	0.0674769	0.173507	0.341366	FALSE
YDR514C	YDR514C	0.253808	0.00495771	0.0214156	FALSE
YDR515W	SLF1	-0.0875829	0.491203	0.673243	FALSE
YDR516C	EMI2	0.0631842	0.717663	0.844081	FALSE
YDR517W	GRH1	-0.0875194	0.418139	0.609176	FALSE
YDR518W	EUG1	-0.0984325	0.584097	0.752393	FALSE
YDR519W	FPR2	-0.41969	4.96915e-12	6.95099e-11	FALSE	-0.193861	17.4582	0
YDR520C	URC2	-0.396331	1.9763e-09	2.25386e-08	FALSE	-0.00165815	0.384545	0.926112
YDR524C	AGE1	-0.761785	7.49018e-05	0.000491251	FALSE
YDR524C-B	YDR524C-B	0.244778	2.97917e-65	2.09184e-63	FALSE	0.00816959	3.17796	0.0466165
YDR525W-A	SNA2	-0.294556	5.87007e-12	8.11611e-11	FALSE	-0.00647546	1.06528	0.623108
YDR526C	YDR526C	0.0812442	0.737472	0.855764	FALSE
YDR527W	RBA50	0.0942289	0.680905	0.819867	FALSE	-0.0769747	1.82391	0.295982
YDR528W	HLR1	-0.246061	0.0936312	0.222786	FALSE
YDR529C	QCR7	-0.0603002	0.0275617	0.0873439	FALSE
YDR530C	APA2	-0.349041	0.0100351	0.0380273	FALSE
YDR531W	CAB1	0.111145	0.372183	0.569323	FALSE
YDR532C	KRE28	0.0549785	0.616528	0.775941	FALSE
YDR533C	HSP31	-0.631085	1.49252e-30	4.81506e-29	FALSE
YDR538W	PAD1	-0.537977	0.00776226	0.0308167	FALSE	0.167985	2.95812	0.0658429
YDR539W	FDC1	-1.55392	2.12593e-12	3.04518e-11	FALSE	-0.654239	65.4664	0
YDR541C	YDR541C	-1.00836	3.76829e-05	0.000260507	FALSE	-0.220691	4.54849	0.00665813
YEL006W	YEA6	0.132326	0.239462	0.423254	FALSE	-0.197133	5.31643	0.00280374
YEL009C	GCN4	0.181064	0.194888	0.368671	FALSE	0.0384497	4.79538	0.00459459
YEL012W	UBC8	-0.389041	0.000406753	0.00231204	FALSE	-0.117731	3.14864	0.0483873
YEL014C	YEL014C	0.0500836	0.702105	0.834463	FALSE
YEL015W	EDC3	-0.0441549	0.714426	0.843508	FALSE	0.0171905	0.439417	0.903639
YEL016C	NPP2	0.413187	0.0355562	0.106194	FALSE	-0.147941	2.04095	0.230286
YEL017W	GTT3	-0.0865583	0.616792	0.775941	FALSE	0.0172279	0.453094	0.89903
YEL018W	EAF5	-0.0758915	0.640279	0.792821	FALSE	0.0772853	1.10042	0.605945
YEL020C	PXP1	-0.510069	0.000291434	0.00171086	FALSE	-0.73413	20.1049	0
YEL020C-B	YEL020C-B	0.15143	3.0157e-10	3.6361e-09	FALSE
YEL020W-A	TIM9	0.15143	3.0157e-10	3.6361e-09	FALSE	-0.0268731	1.0696	0.621041
YEL022W	GEA2	-0.700385	0.000162634	0.00100068	FALSE	-0.014597	0.861142	0.715198
YEL024W	RIP1	0.45098	0.000419189	0.00237518	FALSE	-0.00300066	0.648404	0.810057
YEL026W	SNU13	0.433107	2.4957e-48	1.29523e-46	FALSE	-0.0122077	0.619517	0.821985
YEL029C	BUD16	0.141602	0.216691	0.396916	FALSE	0.0505555	0.835597	0.726534
YEL032W	MCM3	-0.258752	0.053745	0.14476	FALSE	0.025122	0.878025	0.70778
YEL036C	ANP1	0.148342	0.106906	0.24462	FALSE
YEL038W	UTR4	0.000470071	0.995883	0.999183	FALSE	-0.00607347	0.817171	0.733924
YEL040W	UTR2	-0.0351023	0.634147	0.789048	FALSE
YEL044W	IES6	-0.135708	0.0631928	0.163774	FALSE	0.0141088	1.74702	0.320624
YEL046C	GLY1	0.0595111	0.457524	0.646564	FALSE	0.00729946	1.81375	0.299867
YEL047C	FRD1	0.320161	0.125672	0.275081	FALSE	0.0847021	4.72247	0.00471589
YEL050C	RML2	-0.119859	0.481625	0.666422	FALSE	-0.0146721	0.410927	0.915584
YEL052W	AFG1	0.221011	0.202389	0.379653	FALSE	-0.201746	4.03926	0.0154882
YEL055C	POL5	0.153271	0.184153	0.354164	FALSE	0.0982157	3.63233	0.0252138
YEL057C	SDD1	0.194814	0.267922	0.455136	FALSE	0.101199	2.20954	0.189059
YEL058W	PCM1	0.0869095	0.313615	0.504517	FALSE	0.12041	4.2176	0.0115036
YEL059C-A	SOM1	0.0766638	0.606905	0.769047	FALSE	-0.00498489	0.324425	0.9478
YEL060C	PRB1	-0.0567439	0.804687	0.897689	FALSE	-0.0331561	0.486966	0.883096
YEL066W	HPA3	-0.192814	0.00441912	0.0193695	FALSE
YEL068C	YEL068C	-0.371263	0.00204621	0.00984875	FALSE
YEL071W	DLD3	0.178451	5.93902e-07	5.23833e-06	FALSE
YEL072W	RMD6	-0.035889	0.742754	0.858277	FALSE
YER001W	MNN1	-0.309185	0.00047214	0.00263354	FALSE	-0.0294296	1.18612	0.569247
YER004W	FMP52	0.297542	0.000553985	0.00305203	FALSE	0.0843298	3.82769	0.0199625
YER005W	YND1	0.103752	0.606217	0.768909	FALSE	-0.218936	5.73082	0.00201681
YER008C	SEC3	-0.208893	0.0996223	0.232106	FALSE	-0.0292572	0.828013	0.72896
YER012W	PRE1	-0.018626	0.723997	0.847543	FALSE	-0.0192388	1.82277	0.296268
YER015W	FAA2	0.101394	0.579082	0.749167	FALSE	0.0367234	0.647223	0.81068
YER016W	BIM1	0.13243	0.357427	0.551701	FALSE	0.0127916	0.633575	0.816593
YER017C	AFG3	0.0743353	0.661902	0.807189	FALSE	0.0158845	0.404713	0.917683
YER018C	SPC25	-0.33292	0.00556935	0.0238149	FALSE	0.0910269	7.08063	0.000821355
YER019W	ISC1	-0.110335	0.397715	0.591596	FALSE	0.0880455	1.88558	0.279466
YER020W	GPA2	0.0468375	0.72883	0.850698	FALSE	-0.0326413	0.674297	0.798135
YER022W	SRB4	-0.0464054	0.758904	0.864938	FALSE	0.128149	3.54077	0.0284783
YER023C-A	YER023C-A	0.127383	0.00250148	0.0117249	FALSE
YER023W	PRO3	-0.103503	0.00232705	0.0110666	FALSE	0.0398665	4.96766	0.00335664
YER024W	YAT2	-0.193295	0.40471	0.597635	FALSE	0.19005	2.72873	0.0921821
YER026C	CHO1	0.075038	0.0364027	0.107645	FALSE
YER027C	GAL83	-0.0111296	0.92479	0.961687	FALSE	-0.0359459	2.95427	0.0660077
YER028C	MIG3	-0.751961	3.90174e-06	3.08436e-05	FALSE	0.0294227	2.61463	0.110636
YER029C	SMB1	-0.552662	0.00120098	0.00607442	FALSE	-0.0214478	1.50916	0.418309
YER030W	CHZ1	0.316538	3.00888e-09	3.39899e-08	FALSE	0.189329	22.6562	0
YER031C	YPT31	0.321213	3.49438e-08	3.53485e-07	FALSE	0.0436498	2.13789	0.207086
YER032W	FIR1	0.0124717	0.940457	0.968055	FALSE
YER033C	ZRG8	0.132574	0.512147	0.693121	FALSE	-0.0424786	0.411892	0.915192
YER034W	YER034W	-0.0928351	0.502032	0.684085	FALSE	-0.00730877	1.47895	0.429811
YER035W	EDC2	-0.36807	2.07208e-07	1.91734e-06	FALSE
YER036C	ARB1	-0.0990848	0.398555	0.591947	FALSE
YER038W-A	FMP49	0.77175	2.48246e-08	2.53991e-07	FALSE
YER039C	HVG1	0.776739	1.5878e-08	1.67232e-07	FALSE	0.934233	99.4994	0
YER040W	GLN3	0.216563	0.241236	0.424922	FALSE	0.108567	2.29085	0.16926
YER042W	MXR1	-0.13089	0.0975672	0.22859	FALSE	0.0425727	1.87395	0.283751
YER043C	SAH1	0.0242741	0.305207	0.495893	FALSE	0.0510755	12.0871	0
YER046W	SPO73	-0.236758	0.177978	0.346945	FALSE	-0.344159	37.0056	0
YER046W-A	YER046W-A	-0.0849053	0.720786	0.84521	FALSE
YER047C	SAP1	0.000313843	0.998894	1	FALSE	-0.131266	1.41002	0.462956
YER048C	CAJ1	0.264508	0.00267518	0.0124575	FALSE
YER048W-A	ISD11	-0.14349	0.000326609	0.0018956	FALSE
YER049W	TPA1	0.410431	0.0498626	0.1362	FALSE
YER050C	RSM18	-0.232524	3.70299e-05	0.000256488	FALSE
YER051W	JHD1	-0.327993	0.0908503	0.21718	FALSE
YER052C	HOM3	0.00623074	0.929601	0.961884	FALSE
YER053C	PIC2	-0.126053	0.329479	0.522065	FALSE
YER053C-A	YER053C-A	0.0915248	0.0370058	0.109068	FALSE
YER055C	HIS1	0.209095	0.164154	0.330059	FALSE
YER056C	FCY2	-0.0752401	0.132535	0.284537	FALSE
YER056C-A	RPL34A	-0.0941262	1.14186e-05	8.59034e-05	FALSE	0.00104875	1.15764	0.580967
YER059W	PCL6	-0.0670649	0.751207	0.860998	FALSE	0.0271969	0.227422	0.978056
YER061C	CEM1	0.109484	0.628565	0.78483	FALSE
YER062C	GPP2	0.234195	0.00034174	0.00197383	FALSE
YER063W	THO1	0.0596485	0.246615	0.430794	FALSE	0.0473049	2.56172	0.118413
YER065C	ICL1	-0.192372	0.413342	0.605638	FALSE
YER068W	MOT2	0.0902154	0.459904	0.648903	FALSE	0.0142491	0.554858	0.851871
YER069W	ARG5,6	-0.237207	0.0213364	0.0714738	FALSE
YER070W	RNR1	-0.306878	0.000200315	0.00121581	FALSE	-0.000157157	0.0720637	0.998538
YER071C	TDA2	-0.368672	1.78115e-08	1.85957e-07	FALSE	-0.0322913	1.71125	0.336835
YER074W-A	YOS1	0.0245007	0.741903	0.858118	FALSE	0.136859	6.62917	0.000821355
YER075C	PTP3	0.50444	0.000360554	0.00206583	FALSE	-0.00350493	0.400923	0.918917
YER076C	YER076C	-0.829279	0.000699433	0.00375512	FALSE	-0.652581	7.91814	0.000609756
YER077C	MRX1	-0.494774	0.0362993	0.107428	FALSE	-0.154387	1.84115	0.292655
YER080W	AIM9	-0.1455	0.312462	0.503115	FALSE
YER081W	SER3	-0.47567	7.2288e-11	9.37911e-10	FALSE
YER082C	UTP7	-0.412126	4.80053e-07	4.31927e-06	FALSE	-0.00892974	1.33263	0.502391
YER083C	GET2	0.0566277	0.416175	0.607869	FALSE	0.181988	20.189	0
YER086W	ILV1	-0.0596958	0.663775	0.807956	FALSE	0.0405973	2.16478	0.200102
YER087C-A	YER087C-A	-0.0287679	0.877944	0.935735	FALSE
YER087C-B	SBH1	-0.0060417	0.885229	0.941782	FALSE	0.00693742	0.765793	0.755918
YER087W	AIM10	-0.0439237	0.813811	0.902326	FALSE	0.109212	1.40741	0.464487
YER088C	DOT6	0.168177	0.134469	0.286381	FALSE
YER088C-A	YER088C-A	-0.300404	0.0232354	0.0761263	FALSE
YER089C	PTC2	-0.0372001	0.751886	0.86105	FALSE
YER091C	MET6	0.117233	0.614617	0.77498	FALSE
YER093C-A	AIM11	-0.263515	0.0110847	0.0413052	FALSE	-0.0274703	0.0861828	0.997689
YER095W	RAD51	-0.0343627	0.655809	0.803714	FALSE
YER099C	PRS2	0.179949	0.144787	0.303561	FALSE	0.00502187	1.00463	0.651344
YER100W	UBC6	-0.032929	0.68026	0.819867	FALSE	0.00216079	1.49716	0.423037
YER101C	AST2	0.18293	0.320379	0.510809	FALSE	0.313416	8.96443	0.000609756
YER102W	RPS8B	0.378017	0.0228623	0.0751221	FALSE	-0.0128773	2.71069	0.0954616
YER103W	SSA4	0.155864	0.448677	0.638925	FALSE	-0.0661124	0.93653	0.681812
YER107C	GLE2	-0.0561369	0.571172	0.743542	FALSE	0.116238	5.03493	0.00309423
YER111C	SWI4	-0.265783	0.058096	0.15331	FALSE	-0.0957403	1.98906	0.246443
YER112W	LSM4	0.0104081	0.872992	0.933468	FALSE	-0.0937217	7.21388	0.000609756
YER113C	TMN3	0.438487	0.00239715	0.0113248	FALSE	0.217716	8.22296	0.000609756
YER114C	BOI2	0.119361	0.36921	0.566227	FALSE
YER115C	SPR6	0.102224	0.525707	0.704813	FALSE	-0.229413	4.04687	0.0154882
YER117W	RPL23B	-0.116883	2.55174e-18	5.04849e-17	FALSE	0.00406546	0.498915	0.877677
YER118C	SHO1	-0.0261321	0.856364	0.924064	FALSE	0.132194	3.87655	0.0197002
YER119C	AVT6	0.243139	0.0187852	0.0644346	FALSE
YER120W	SCS2	0.336787	5.07037e-06	3.96441e-05	FALSE
YER121W	YER121W	-0.0227721	0.917267	0.958236	FALSE	0.181479	3.41105	0.0342958
YER122C	GLO3	0.0376548	0.661436	0.807189	FALSE	0.121328	8.52347	0.000609756
YER123W	YCK3	0.308476	0.0586054	0.154086	FALSE	-0.0577331	2.29733	0.167569
YER124C	DSE1	-0.26874	0.00714842	0.0288271	TRUE	-0.317781	5.37885	0.00280374
YER125W	RSP5	-0.202622	0.0174111	0.0605332	FALSE
YER127W	LCP5	0.0441275	0.707072	0.837864	FALSE	0.0870338	4.54795	0.00665813
YER129W	SAK1	0.147337	0.534202	0.712999	FALSE	-0.156698	3.37741	0.03633
YER130C	COM2	-0.15434	0.23141	0.41349	FALSE	0.0405927	0.571827	0.844467
YER132C	PMD1	-0.171286	0.474299	0.659638	FALSE	-0.11055	2.26208	0.175843
YER133W	GLC7	0.153441	0.123012	0.270747	FALSE	0.00747326	0.486957	0.8831
YER133W-A	YER133W-A	0.417735	0.0918984	0.21922	FALSE
YER134C	YER134C	0.417735	0.0918984	0.21922	FALSE
YER141W	COX15	0.362872	0.00742852	0.0296892	FALSE	0.00108314	0.688763	0.792561
YER143W	DDI1	-0.0258649	0.818901	0.902874	FALSE	-0.0158016	1.61564	0.377133
YER144C	UBP5	0.158347	0.389981	0.584739	FALSE	-0.395418	9.76393	0.000609756
YER145C	FTR1	0.0616829	0.252922	0.437966	FALSE	-0.177779	165.808	0
YER148W	SPT15	0.159113	0.0447943	0.125601	FALSE	0.174752	20.3084	0
YER150W	SPI1	-0.889118	1.24925e-14	1.98825e-13	FALSE
YER152C	YER152C	0.122806	0.157534	0.321076	FALSE	0.190983	12.9719	0
YER154W	OXA1	-0.0628813	0.521222	0.701163	FALSE
YER155C	BEM2	-0.166083	0.103464	0.238267	FALSE
YER156C	YER156C	-0.240954	3.09479e-05	0.000216454	FALSE
YER157W	COG3	0.0903832	0.505915	0.687745	FALSE
YER158C	YER158C	-0.0394171	0.80218	0.89573	FALSE
YER161C	SPT2	-0.194027	0.174262	0.341837	FALSE	-0.154915	3.04004	0.0573987
YER162C	RAD4	0.173049	0.432112	0.624704	FALSE	0.0746687	0.872612	0.709451
YER163C	GCG1	-0.206333	0.0131508	0.0476169	FALSE
YER164W	CHD1	-0.359433	0.0420043	0.120398	FALSE	0.0327281	1.34775	0.493266
YER168C	CCA1	-0.202214	0.187713	0.359274	FALSE	-0.101239	2.04495	0.229556
YER169W	RPH1	-0.120231	0.525104	0.704796	FALSE	-0.0652366	1.32791	0.50496
YER170W	ADK2	-0.210187	0.299584	0.490091	FALSE	0.00338364	0.521078	0.868224
YER171W	RAD3	-0.0260664	0.866985	0.930378	FALSE	0.0410054	1.15874	0.580687
YER172C	BRR2	0.0552737	0.716173	0.843902	FALSE	0.000932132	1.18941	0.568023
YER173W	RAD24	-0.257714	0.131959	0.283957	FALSE	0.185955	3.14637	0.0484558
YER174C	GRX4	-0.237392	0.0100491	0.0380399	FALSE	-0.0714674	1.47803	0.430289
YER176W	ECM32	-0.073765	0.661363	0.807189	FALSE	0.0632082	2.48002	0.134433
YER177W	BMH1	-0.239975	1.4557e-30	4.73896e-29	FALSE	-0.0448598	10.4418	0.000609756
YER178W	PDA1	-0.0551176	0.157061	0.320543	FALSE	-0.0253258	1.89327	0.276134
YER182W	FMP10	-0.389016	8.23154e-05	0.000534975	FALSE	-0.22233	5.49693	0.00223642
YER183C	FAU1	0.0979331	0.35031	0.5441	FALSE	0.0217548	1.17646	0.573088
YER186C	YER186C	2.46063	1.00545e-28	3.13088e-27	FALSE	0.962694	63.4684	0
YER187W	YER187W	-0.0397819	0.764415	0.867904	FALSE	0.415559	7.32041	0.000609756
YFL001W	DEG1	-0.0229451	0.891002	0.944267	FALSE	-0.233906	7.317	0.000609756
YFL002C	SPB4	0.0721427	0.623324	0.779918	FALSE	-0.0276619	3.65414	0.0243431
YFL004W	VTC2	-0.0705224	0.49795	0.680321	FALSE	-0.0359417	0.550576	0.853799
YFL010C	WWM1	-0.229842	0.00293694	0.0135182	FALSE	-0.00328117	0.154372	0.989973
YFL010W-A	AUA1	-0.501212	4.4289e-08	4.43014e-07	FALSE
YFL013C	IES1	-0.549178	0.000523184	0.00290019	FALSE	-0.00201337	0.272608	0.964208
YFL013W-A	YFL013W-A	-0.542944	0.0186588	0.064124	FALSE
YFL014W	HSP12	-0.401998	7.72391e-36	3.10779e-34	TRUE	-0.167195	35.8574	0
YFL016C	MDJ1	0.290318	0.0286369	0.0896917	FALSE	-0.0253121	0.642182	0.813338
YFL018C	LPD1	-0.182739	0.000943994	0.00494217	FALSE	-0.0611337	2.80874	0.0806835
YFL021C-A	YFL021C-A	-0.109054	0.529121	0.708065	FALSE
YFL021W	GAT1	-0.107818	0.385752	0.580167	FALSE	-0.0322875	1.25573	0.539904
YFL022C	FRS2	-0.217247	0.191962	0.363904	FALSE	-0.060747	3.00832	0.059456
YFL023W	BUD27	-0.62394	0.00603437	0.0253628	FALSE	-0.143509	3.56126	0.0278256
YFL025C	BST1	-0.561228	0.00279049	0.0129272	FALSE	-0.08183	0.85652	0.717398
YFL028C	CAF16	0.206119	0.120604	0.266925	FALSE	0.0879733	2.59613	0.113674
YFL029C	CAK1	-0.163075	0.152953	0.313883	FALSE	-0.24003	3.52243	0.0298894
YFL030W	AGX1	-0.208866	0.0577831	0.152935	FALSE	-0.601496	22.4485	0
YFL031W	HAC1	0.414076	9.31719e-99	9.8132e-97	FALSE	0.158663	85.3304	0
YFL033C	RIM15	-0.447589	0.000965378	0.00504674	FALSE	-0.115267	1.71288	0.336177
YFL034C-A	RPL22B	-0.101097	0.0133213	0.0481367	FALSE	0.0341579	2.77278	0.0857337
YFL034C-B	MOB2	0.076066	0.474535	0.65967	FALSE	0.30846	11.4076	0
YFL034W	MIL1	0.108834	0.510847	0.691733	FALSE	-0.0291158	1.37864	0.478538
YFL036W	RPO41	0.223636	0.163553	0.329777	FALSE	0.109313	2.83904	0.0783236
YFL037W	TUB2	-0.15963	0.61567	0.775781	FALSE
YFL038C	YPT1	0.145942	0.000609905	0.00331926	FALSE	0.000773672	1.78336	0.309535
YFL041W	FET5	0.0909335	0.520859	0.700937	FALSE	-0.03921	1.08433	0.61359
YFL044C	OTU1	-0.114731	0.447712	0.637985	FALSE	-0.13341	2.35588	0.156062
YFL045C	SEC53	0.208142	2.9643e-16	5.25503e-15	FALSE	0.0306794	2.57633	0.116715
YFL047W	RGD2	-0.295636	0.117921	0.263099	FALSE	0.0694567	1.08994	0.61185
YFL048C	EMP47	-0.037291	0.71569	0.84361	FALSE	0.189541	6.75529	0.000821355
YFL049W	SWP82	-0.222943	0.187471	0.359193	FALSE	-0.478565	17.0519	0
YFL050C	ALR2	-0.452955	0.0346557	0.103986	FALSE
YFL062W	COS4	-4.31241	1.51639e-71	1.23414e-69	FALSE	-0.28097	10.1501	0.000609756
YFR004W	RPN11	-0.0388025	0.72468	0.848066	FALSE	-0.0347911	0.953947	0.67612
YFR006W	YFR006W	-0.281145	0.0120065	0.0438727	FALSE	0.0567835	1.23222	0.550845
YFR007W	YFH7	0.250492	0.271517	0.457986	FALSE	0.209463	2.31081	0.16423
YFR009W	GCN20	-0.234766	0.0398862	0.11556	FALSE
YFR011C	MIC19	-0.278169	3.55038e-08	3.58139e-07	FALSE	0.0220568	0.88738	0.703738
YFR014C	CMK1	0.0574391	0.619761	0.777905	FALSE	-0.0526418	1.98715	0.24721
YFR016C	YFR016C	0.211175	0.0478073	0.13195	FALSE	0.30868	26.6138	0
YFR017C	IGD1	0.0941809	0.44638	0.636594	FALSE	0.1715	8.3102	0.000609756
YFR018C	YFR018C	-0.64582	0.00127782	0.00641779	FALSE	-0.249617	8.0894	0.000609756
YFR021W	ATG18	-0.173096	0.464183	0.651348	FALSE	-0.0755049	3.59299	0.0264281
YFR024C-A	LSB3	-0.0907863	0.268931	0.45637	FALSE	0.0316831	1.13072	0.592164
YFR025C	HIS2	0.267764	0.00613607	0.0257298	FALSE	0.590437	54.9745	0
YFR029W	PTR3	-0.0315418	0.875928	0.934653	FALSE	0.0805415	0.975348	0.666958
YFR030W	MET10	-0.383855	0.000313495	0.00182541	FALSE	-0.0397677	2.40219	0.148854
YFR031C	SMC2	0.0929372	0.652493	0.801295	FALSE	-0.140161	5.50775	0.00223642
YFR032C-A	RPL29	-0.0812411	6.20885e-17	1.12862e-15	FALSE	-0.00887668	0.468947	0.890776
YFR034C	PHO4	-0.0675205	0.749855	0.860998	FALSE
YFR035C	YFR035C	0.58228	5.46151e-16	9.44814e-15	FALSE
YFR036W	CDC26	0.44546	0.00657494	0.0270322	FALSE
YFR036W-A	YFR036W-A	0.308442	0.000447826	0.00251358	FALSE
YFR037C	RSC8	0.319936	0.000251486	0.00150095	FALSE
YFR038W	IRC5	0.00668187	0.966671	0.983423	FALSE
YFR040W	SAP155	0.122294	0.4206	0.611766	FALSE	0.0995276	2.85133	0.0779184
YFR041C	ERJ5	0.215048	0.0684754	0.173785	FALSE	0.162723	5.83005	0.00141343
YFR042W	KEG1	-0.140473	0.0658593	0.1687	FALSE	-0.175634	5.68999	0.00201681
YFR043C	IRC6	-0.170836	0.0442977	0.124416	FALSE	0.0268359	0.293885	0.957675
YFR044C	DUG1	-0.143807	0.309111	0.499191	FALSE
YFR047C	BNA6	-0.323009	7.73898e-06	5.89644e-05	FALSE
YFR048W	RMD8	-0.266581	0.142787	0.30025	FALSE
YFR049W	YMR31	-0.197591	3.89626e-05	0.000267918	FALSE
YFR050C	PRE4	-0.31174	1.53741e-07	1.46422e-06	FALSE
YFR051C	RET2	-0.345915	0.000111569	0.000699701	FALSE
YFR052W	RPN12	-0.333858	1.31704e-06	1.12027e-05	FALSE	-0.0548204	2.62529	0.109288
YGL002W	ERP6	-0.0639559	0.601685	0.765139	FALSE	0.00653918	0.162645	0.98916
YGL003C	CDH1	0.0290503	0.874198	0.933765	FALSE	0.113798	2.54647	0.12157
YGL004C	RPN14	-0.00456616	0.976601	0.98875	FALSE	0.071328	1.79332	0.306149
YGL005C	COG7	0.246942	0.0276801	0.0876414	FALSE	-0.0677871	1.10289	0.60521
YGL006W	PMC1	0.299188	0.00854072	0.0333526	FALSE	0.15379	6.65913	0.000821355
YGL007C-A	YGL007C-A	-0.238834	0.29202	0.481457	FALSE	0.0133932	0.486232	0.88341
YGL008C	PMA1	-0.210083	3.46395e-07	3.15634e-06	FALSE
YGL009C	LEU1	0.243646	0.00651946	0.0269276	FALSE
YGL010W	MPO1	0.20791	0.0201905	0.0684032	FALSE
YGL011C	SCL1	-0.116229	0.0326689	0.0991417	FALSE	0.00131832	1.14074	0.587861
YGL012W	ERG4	0.0122238	0.826145	0.905826	FALSE	0.124462	14.3991	0
YGL013C	PDR1	-0.0233541	0.917336	0.958236	FALSE	-0.182833	5.28819	0.00284146
YGL014W	PUF4	-0.0922999	0.595657	0.760837	FALSE	-0.10855	2.45505	0.138224
YGL015C	YGL015C	-0.266398	0.185446	0.355886	FALSE
YGL016W	KAP122	-0.037166	0.850134	0.920681	FALSE	0.133334	2.2453	0.179279
YGL018C	JAC1	-0.112034	0.361156	0.556737	FALSE	-0.347903	15.5313	0
YGL019W	CKB1	0.33731	2.31766e-05	0.000164348	FALSE	-0.00141478	0.770552	0.753984
YGL020C	GET1	0.0645518	0.280653	0.469132	FALSE	-0.00326228	0.776453	0.750842
YGL021W	ALK1	0.139906	0.0773613	0.19132	FALSE	0.0197876	0.564438	0.847722
YGL023C	PIB2	0.0800683	0.568374	0.741745	FALSE	-0.00304013	0.849701	0.720477
YGL027C	CWH41	0.183555	0.169353	0.336544	FALSE	-0.0946711	5.06699	0.00301205
YGL029W	CGR1	0.187666	0.164042	0.330059	FALSE	0.0198494	0.516276	0.870043
YGL033W	HOP2	0.00098606	0.996393	0.999183	FALSE	-0.240163	1.17245	0.574871
YGL037C	PNC1	0.00250486	0.99187	0.997721	FALSE	-0.0223108	1.02836	0.640028
YGL038C	OCH1	-0.231364	0.0678494	0.172931	FALSE	-0.0365994	0.773111	0.752621
YGL039W	YGL039W	0.0935054	0.594281	0.760043	FALSE	0.0818318	2.19146	0.192764
YGL040C	HEM2	-0.163201	0.00904062	0.0350373	FALSE	0.0195193	1.46031	0.438824
YGL041C	YGL041C	-0.167348	0.0710297	0.178999	FALSE
YGL041W-A	YGL041W-A	-0.054493	0.432881	0.625312	FALSE	0.0141969	1.58414	0.388538
YGL042C	YGL042C	-0.0639169	0.381506	0.577089	FALSE
YGL043W	DST1	-0.0724272	0.319625	0.510516	FALSE	0.0093811	0.526251	0.866495
YGL045W	RIM8	0.528416	0.0256366	0.0822622	FALSE	-0.0883235	1.83691	0.293422
YGL048C	RPT6	-0.0537814	0.38066	0.57687	FALSE
YGL050W	TYW3	0.346684	0.000593477	0.00324199	FALSE
YGL055W	OLE1	-0.0889507	0.715094	0.84361	FALSE
YGL056C	SDS23	0.0601697	0.806288	0.89885	FALSE
YGL057C	GEP7	0.100435	0.414019	0.606133	FALSE
YGL058W	RAD6	-0.148066	0.173876	0.341366	FALSE	-0.117259	2.58744	0.115079
YGL059W	PKP2	0.0976662	0.580512	0.750203	FALSE	-0.150007	3.3216	0.0399538
YGL060W	YBP2	0.0051599	0.977634	0.989187	FALSE	-0.284754	9.64932	0.000609756
YGL061C	DUO1	-0.142217	0.342149	0.534803	FALSE	-0.0161575	0.135166	0.992143
YGL062W	PYC1	0.220513	0.0134877	0.04864	FALSE	0.0181266	0.953955	0.676118
YGL065C	ALG2	-0.00973159	0.935686	0.964505	FALSE	-0.191687	7.89969	0.000609756
YGL066W	SGF73	0.0514774	0.746039	0.859352	FALSE	0.176485	4.55493	0.00665813
YGL067W	NPY1	-0.33474	0.0195433	0.0665886	FALSE	-0.147041	4.16568	0.0125108
YGL068W	MNP1	0.213868	0.00858064	0.033472	FALSE	0.0503022	2.35859	0.155618
YGL070C	RPB9	0.351514	0.042515	0.121172	FALSE
YGL071W	AFT1	0.283503	0.0976492	0.22859	FALSE
YGL072C	YGL072C	-0.26224	0.0298432	0.0924468	FALSE
YGL073W	HSF1	-0.1354	0.133667	0.285938	FALSE	-0.161392	3.68694	0.0231121
YGL076C	RPL7A	-0.184751	0.269506	0.456528	FALSE
YGL077C	HNM1	0.104356	0.0412618	0.118491	FALSE
YGL078C	DBP3	-0.462998	0.00053402	0.00295568	FALSE	0.050485	5.3948	0.00280374
YGL079W	KXD1	-0.233952	0.0840099	0.204041	FALSE	0.119588	3.60561	0.0260287
YGL080W	MPC1	0.0931477	0.307497	0.497921	FALSE	0.174763	10.0756	0.000609756
YGL082W	YGL082W	-0.134983	0.274847	0.462522	FALSE	-0.0850691	2.57515	0.11689
YGL084C	GUP1	0.163856	0.269261	0.456411	FALSE	0.0225792	0.0984012	0.996855
YGL086W	MAD1	0.145362	0.244994	0.429851	FALSE	0.118871	5.16064	0.00301205
YGL087C	MMS2	0.49412	5.77482e-13	8.51013e-12	FALSE
YGL088W	YGL088W	1.13828	1.77198e-27	5.28788e-26	FALSE
YGL091C	NBP35	-0.329028	0.0092649	0.0357701	FALSE	-0.150751	5.87835	0.00141343
YGL093W	SPC105	-0.166461	0.355514	0.549221	FALSE	-0.241861	7.78783	0.000609756
YGL095C	VPS45	0.122819	0.325291	0.516341	FALSE	0.0418743	2.19856	0.191399
YGL096W	TOS8	-0.909416	8.05861e-10	9.39996e-09	FALSE	-0.46907	58.0174	0
YGL097W	SRM1	0.382484	2.49138e-05	0.000175623	FALSE
YGL098W	USE1	0.139158	0.564183	0.738969	FALSE
YGL099W	LSG1	-0.0651496	0.681001	0.819867	FALSE
YGL100W	SEH1	0.229414	0.00244048	0.011484	FALSE
YGL101W	YGL101W	-0.30025	0.0412318	0.118491	FALSE	-0.0717249	1.55612	0.399131
YGL104C	VPS73	-0.325486	0.0624743	0.162376	FALSE	-0.0338502	0.689829	0.792227
YGL106W	MLC1	-0.375579	2.00762e-06	1.66034e-05	FALSE	-0.109726	16.3323	0
YGL107C	RMD9	-0.0910632	0.664078	0.807956	FALSE	0.11778	2.62053	0.110152
YGL108C	YGL108C	-0.221419	0.100234	0.233228	FALSE	-0.00985819	0.48985	0.88186
YGL109W	YGL109W	-0.26438	0.0747337	0.186366	FALSE
YGL110C	CUE3	-0.288223	0.190972	0.362457	FALSE	-0.0128315	0.681993	0.794682
YGL111W	NSA1	0.470004	0.0652552	0.167392	FALSE	0.0374907	0.817034	0.733967
YGL114W	YGL114W	0.23584	0.152713	0.313749	FALSE	-0.0495542	1.75992	0.317154
YGL119W	COQ8	0.021259	0.903789	0.952182	FALSE	-0.0171282	0.354886	0.938002
YGL120C	PRP43	-0.113028	0.449994	0.639963	FALSE	0.063641	2.05717	0.225185
YGL122C	NAB2	0.0876326	0.381466	0.577089	FALSE	0.0501355	1.4951	0.423683
YGL123W	RPS2	0.455691	2.51207e-273	1.79914e-270	TRUE	0.0515897	24.3496	0
YGL124C	MON1	-0.0639603	0.589689	0.756602	FALSE
YGL127C	SOH1	-0.202945	0.0493452	0.13489	FALSE	0.0193357	0.870702	0.710041
YGL128C	CWC23	-0.000798416	0.996242	0.999183	FALSE	-0.135852	3.75883	0.0209059
YGL129C	RSM23	-0.0598967	0.515386	0.695927	FALSE	-0.50094	23.4922	0
YGL130W	CEG1	-0.0235098	0.864861	0.929132	FALSE	0.0241135	0.886818	0.704
YGL133W	ITC1	-0.0698391	0.762573	0.866912	FALSE	0.0353354	1.71514	0.335262
YGL134W	PCL10	-0.0406173	0.817868	0.902831	FALSE	-0.00341893	0.751004	0.762675
YGL136C	MRM2	-0.180515	0.263246	0.450008	FALSE	-0.140435	3.33029	0.0396962
YGL137W	SEC27	0.218588	0.0390162	0.113831	FALSE	-0.0351754	1.17813	0.57235
YGL139W	FLC3	0.0798722	0.576803	0.747443	FALSE
YGL140C	YGL140C	0.149735	0.135793	0.288418	FALSE	0.104955	2.23438	0.182069
YGL141W	HUL5	0.342605	0.0359126	0.10708	FALSE	-0.0725798	1.46389	0.437204
YGL143C	MRF1	-0.0332845	0.840678	0.914757	FALSE	0.04112	1.1761	0.57325
YGL144C	ROG1	-0.0909662	0.596304	0.760958	FALSE	-0.0839874	1.82994	0.294463
YGL145W	TIP20	-0.147533	0.409739	0.602263	FALSE	0.0480023	1.54034	0.404091
YGL148W	ARO2	-0.275679	2.4087e-06	1.97381e-05	FALSE	0.0828499	6.11474	0.00141343
YGL150C	INO80	0.233928	0.0966843	0.227781	FALSE
YGL152C	YGL152C	0.119545	0.39872	0.591947	FALSE
YGL153W	PEX14	0.119545	0.39872	0.591947	FALSE	-0.0181361	1.60917	0.379212
YGL155W	CDC43	0.161211	0.339656	0.533469	FALSE	-0.095174	1.61294	0.37797
YGL157W	ARI1	0.272373	0.00166503	0.00813435	FALSE	0.221654	11.9487	0
YGL159W	YGL159W	0.241094	0.105607	0.242266	FALSE	0.0428606	1.68275	0.350584
YGL160W	AIM14	0.0193213	0.907555	0.954136	FALSE	0.0185547	0.608557	0.8295
YGL161C	YIP5	-0.637214	1.9657e-17	3.66623e-16	FALSE	-0.296359	44.2611	0
YGL162W	SUT1	-1.13325	7.21575e-15	1.15355e-13	FALSE	-0.157523	0.77677	0.750673
YGL163C	RAD54	-0.571426	0.00624905	0.0260052	FALSE
YGL164C	YRB30	-0.0723948	0.695283	0.830767	FALSE	-0.057871	1.85885	0.28767
YGL165C	YGL165C	-0.0757172	0.566736	0.740505	FALSE
YGL166W	CUP2	-0.0757172	0.566736	0.740505	FALSE	0.0683877	2.12874	0.209202
YGL167C	PMR1	0.0230082	0.823319	0.904666	FALSE	-0.00444999	1.13773	0.589213
YGL168W	HUR1	0.0742619	0.495768	0.677871	FALSE
YGL169W	SUA5	0.0036031	0.968585	0.984211	FALSE	0.179014	7.85776	0.000609756
YGL170C	SPO74	0.013713	0.934243	0.964474	FALSE
YGL171W	ROK1	0.0371415	0.810325	0.901103	FALSE
YGL172W	NUP49	0.0567584	0.624912	0.781085	FALSE
YGL173C	XRN1	0.131994	0.218566	0.399501	FALSE	0.0271972	1.3712	0.482493
YGL176C	YGL176C	-0.175478	0.330258	0.523068	FALSE	0.21676	5.65974	0.00201681
YGL181W	GTS1	-0.116242	0.309189	0.499191	FALSE	0.390578	62.1496	0
YGL185C	YGL185C	-0.176642	0.257854	0.443861	FALSE	0.322897	11.0629	0
YGL189C	RPS26A	-0.0978984	3.40632e-18	6.6656e-17	FALSE	-0.00183662	1.94652	0.260238
YGL190C	CDC55	0.0948068	0.45681	0.64581	FALSE	0.0329025	1.27587	0.530325
YGL191W	COX13	-0.0168181	0.679594	0.819403	FALSE	-0.0968721	11.0122	0
YGL192W	IME4	-0.200382	0.335944	0.529031	FALSE	-0.021528	0.695001	0.789917
YGL194C-A	YGL194C-A	-0.690877	1.73704e-05	0.000126946	FALSE	-0.368217	20.3802	0
YGL195W	GCN1	0.0250289	0.888177	0.942894	FALSE	-0.0566593	3.819	0.019979
YGL196W	DSD1	0.674864	0.00709245	0.0287634	FALSE	0.109884	4.15053	0.0127387
YGL198W	YIP4	-0.047832	0.712403	0.84223	FALSE	-0.0134146	0.814276	0.73484
YGL200C	EMP24	0.0679222	0.0481352	0.132696	FALSE
YGL201C	MCM6	0.0412681	0.746121	0.859352	FALSE	0.0346472	0.786723	0.746663
YGL202W	ARO8	0.0324006	0.543029	0.721443	FALSE	0.0952741	7.99388	0.000609756
YGL206C	CHC1	0.232973	0.0176087	0.0611015	FALSE	0.131659	6.53038	0.000821355
YGL207W	SPT16	0.119595	0.256684	0.442981	FALSE	0.0276521	1.02028	0.643157
YGL208W	SIP2	-0.41394	0.0110667	0.041281	FALSE
YGL209W	MIG2	-0.321127	0.000561439	0.00308361	FALSE
YGL211W	NCS6	-0.171259	0.0878682	0.211605	FALSE	0.0494195	1.19154	0.567143
YGL215W	CLG1	0.409058	0.00076179	0.00405948	FALSE	0.00213668	1.54257	0.403285
YGL220W	BOL2	0.81093	0.000356489	0.00204582	FALSE	-0.00588153	2.28473	0.170747
YGL221C	NIF3	0.200151	0.0709931	0.178999	FALSE	-0.0653845	1.74255	0.322188
YGL222C	EDC1	2.16496	5.79126e-08	5.76069e-07	FALSE	-0.231974	7.26519	0.000609756
YGL223C	COG1	-1.35762	1.21633e-06	1.03706e-05	FALSE	-0.405606	9.51865	0.000609756
YGL226C-A	OST5	-0.172351	0.000625551	0.00339409	FALSE	0.030838	1.60614	0.380423
YGL226W	MTC3	0.457909	0.00267212	0.0124575	FALSE	0.215649	13.0053	0
YGL227W	VID30	-0.426127	0.039217	0.114045	FALSE	-0.00286775	0.161522	0.989173
YGL228W	SHE10	-0.175067	0.166192	0.332663	FALSE	0.00128096	0.440983	0.903141
YGL229C	SAP4	-0.350297	0.130019	0.281499	FALSE	-0.0699903	1.22398	0.55391
YGL232W	TAN1	-0.0394557	0.688769	0.825739	FALSE	0.0864734	2.38521	0.151263
YGL233W	SEC15	-0.308862	0.0293989	0.0916254	FALSE	-0.0308151	1.91601	0.268422
YGL237C	HAP2	0.0464595	0.752619	0.86159	FALSE	-0.0605097	1.98543	0.247898
YGL238W	CSE1	-0.160596	0.263131	0.450008	FALSE	-0.0284413	1.82142	0.296609
YGL241W	KAP114	-0.101181	0.618537	0.777186	FALSE	-0.0131521	1.32909	0.504426
YGL242C	YGL242C	0.04894	0.685838	0.823604	FALSE	-0.12518	5.06205	0.00301205
YGL243W	TAD1	-0.228842	0.312317	0.503107	FALSE	-0.364193	11.4477	0
YGL244W	RTF1	-0.0509111	0.81556	0.902831	FALSE	-0.0514594	3.31325	0.0400722
YGL245W	GUS1	-0.192938	1.75815e-06	1.47101e-05	FALSE
YGL246C	RAI1	-0.261112	0.00656786	0.0270322	FALSE	-0.200505	9.71556	0.000609756
YGL247W	BRR6	-0.269793	0.00771748	0.0306729	FALSE	-0.117231	1.92132	0.266786
YGL248W	PDE1	0.0324024	0.821881	0.903918	FALSE
YGL249W	ZIP2	-0.23934	0.297023	0.486798	FALSE
YGL250W	RMR1	0.156528	0.381813	0.577089	FALSE
YGL252C	RTG2	0.0920883	0.486891	0.670598	FALSE	-0.113797	5.27796	0.00301205
YGL255W	ZRT1	-0.23334	7.50936e-06	5.75824e-05	FALSE	0.0381981	6.43966	0.000821355
YGL257C	MNT2	-0.269664	0.188188	0.359797	FALSE	-0.0956369	2.47901	0.134541
YGL263W	COS12	0.635989	0.00753555	0.0300165	FALSE	0.041187	0.722035	0.777311
YGR001C	EFM5	-0.0614565	0.783738	0.883679	FALSE	-0.00222398	0.137867	0.991942
YGR002C	SWC4	-0.175615	0.22908	0.411195	FALSE	0.0155092	1.81783	0.297971
YGR003W	CUL3	-0.644102	0.00584055	0.0247222	FALSE	-0.224275	3.64091	0.0250336
YGR004W	PEX31	-0.0199239	0.91783	0.958236	FALSE	0.179234	2.34282	0.158159
YGR007W	ECT1	0.267758	3.44158e-12	4.85209e-11	FALSE	0.0302862	0.879672	0.707271
YGR008C	STF2	0.103725	0.00788825	0.0312131	FALSE	0.12146	14.0507	0
YGR009C	SEC9	-0.140574	0.396805	0.591081	FALSE
YGR010W	NMA2	-0.468353	0.00789753	0.0312153	FALSE	-0.0470857	0.93198	0.68345
YGR011W	YGR011W	-0.462253	0.00826415	0.0324495	FALSE	-0.358696	21.0008	0
YGR012W	MCY1	0.0291134	0.871562	0.932652	FALSE
YGR013W	SNU71	-0.373359	0.0764424	0.189467	FALSE
YGR014W	MSB2	0.0100642	0.929904	0.961884	FALSE	0.0339955	0.706134	0.784642
YGR015C	YGR015C	0.00106327	0.995971	0.999183	FALSE	-0.0937882	1.56188	0.397449
YGR016W	YGR016W	-0.46519	0.031452	0.0961002	FALSE
YGR017W	YGR017W	-0.160869	0.1641	0.330059	FALSE
YGR020C	VMA7	-0.296789	3.90042e-13	5.81975e-12	FALSE
YGR021W	YGR021W	-0.0592368	0.523024	0.703058	FALSE
YGR024C	THG1	0.138873	0.155757	0.318177	FALSE
YGR026W	YGR026W	0.140892	0.0111237	0.0414075	FALSE	0.0873161	3.82793	0.019962
YGR029W	ERV1	-0.188521	0.0757679	0.188289	FALSE	-0.0359773	2.49263	0.13194
YGR030C	POP6	-0.363679	0.000613642	0.00333452	FALSE
YGR032W	GSC2	0.0863145	0.687095	0.824837	FALSE
YGR033C	TIM21	-0.363533	0.000120342	0.000750774	FALSE
YGR035W-A	YGR035W-A	0.151728	0.446372	0.636594	FALSE
YGR037C	ACB1	-0.317764	0.00927966	0.0357701	FALSE	0.0237937	2.32581	0.161114
YGR038W	ORM1	0.0694661	0.573882	0.745131	FALSE	0.0560713	2.47024	0.135463
YGR041W	BUD9	0.0534872	0.75136	0.860998	FALSE	0.278188	5.34742	0.00280374
YGR042W	MTE1	-0.330156	0.025151	0.0815074	FALSE	-0.314138	16.2885	0
YGR046W	TAM41	-0.0789402	0.526048	0.705007	FALSE	0.00452798	1.00375	0.651823
YGR048W	UFD1	0.115074	0.397667	0.591596	FALSE	0.127187	5.46443	0.00253165
YGR049W	SCM4	-0.139082	0.18009	0.349161	FALSE	-0.119708	3.31072	0.0400993
YGR050C	YGR050C	-0.38726	0.00272578	0.0126602	FALSE	-0.265777	5.85975	0.00141343
YGR051C	YGR051C	-1.10932	3.54127e-07	3.2186e-06	FALSE
YGR052W	FMP48	-0.509622	0.00307271	0.0140708	FALSE	-0.609905	30.6844	0
YGR054W	YGR054W	-0.0520883	0.521791	0.701665	FALSE	-0.0496764	1.41534	0.460279
YGR056W	RSC1	0.174636	0.246498	0.430794	FALSE	-0.0326337	1.4153	0.460298
YGR057C	LST7	0.2618	0.154155	0.315626	FALSE	0.207794	1.29741	0.520491
YGR060W	ERG25	-0.0834461	0.0622593	0.162028	FALSE
YGR061C	ADE6	0.0308994	0.753671	0.861716	FALSE
YGR062C	COX18	0.311698	0.0361004	0.107227	FALSE	0.117237	1.49597	0.423409
YGR063C	SPT4	0.0692176	0.232298	0.414685	FALSE	0.0685515	2.64355	0.105793
YGR064W	YGR064W	-0.030832	0.581648	0.751139	FALSE
YGR065C	VHT1	-1.18437	6.39555e-23	1.57948e-21	FALSE	-0.426222	155.922	0
YGR069W	YGR069W	-0.215159	0.332779	0.525201	FALSE
YGR070W	ROM1	-0.746112	0.000427338	0.00241445	FALSE	-0.0517646	2.17005	0.198953
YGR071C	ENV11	-0.000114024	0.999498	1	FALSE	0.0576355	1.71102	0.336927
YGR072W	UPF3	-0.197592	0.134163	0.28605	FALSE
YGR073C	YGR073C	-0.238499	0.167118	0.33392	FALSE	-0.0117553	0.303639	0.954188
YGR074W	SMD1	0.0257752	0.676798	0.817659	FALSE	-0.0195043	2.35093	0.156874
YGR075C	PRP38	0.0497169	0.437766	0.628817	FALSE
YGR077C	PEX8	-0.607599	0.000294877	0.00172661	FALSE
YGR078C	PAC10	-1.1687	1.7295e-10	2.15795e-09	FALSE
YGR080W	TWF1	-0.0383915	0.644646	0.796026	FALSE
YGR081C	SLX9	0.00697578	0.934655	0.964474	FALSE
YGR082W	TOM20	-0.273383	2.88276e-05	0.000202415	FALSE
YGR084C	MRP13	0.138111	0.306453	0.496789	FALSE	0.0227071	1.04444	0.632473
YGR085C	RPL11B	-0.150308	0.182701	0.352507	FALSE	-0.0172426	2.63438	0.107606
YGR086C	PIL1	-0.086462	0.00726777	0.029177	FALSE	0.0617217	9.12319	0.000609756
YGR088W	CTT1	-0.200459	0.00617002	0.0257816	FALSE	-0.254506	2.80778	0.0808395
YGR090W	UTP22	-0.192977	0.238264	0.421412	FALSE	0.00711127	1.02573	0.641048
YGR091W	PRP31	0.460922	0.0109656	0.0409466	FALSE	0.114794	1.33691	0.499746
YGR092W	DBF2	0.0499502	0.754418	0.86202	FALSE
YGR093W	DRN1	-0.0899343	0.658768	0.806237	FALSE	0.0106338	0.106526	0.99566
YGR094W	VAS1	-0.195337	0.00712934	0.0288018	FALSE	-0.0637283	5.01306	0.00335664
YGR095C	RRP46	-0.0933034	0.376438	0.573166	FALSE
YGR097W	ASK10	-0.0111938	0.941986	0.968304	FALSE
YGR098C	ESP1	-0.0982843	0.561128	0.736314	FALSE
YGR099W	TEL2	-0.395806	0.0407539	0.117504	FALSE
YGR102C	GTF1	-0.0205665	0.820021	0.903079	FALSE	-0.0720139	5.22322	0.00301205
YGR103W	NOP7	-0.334145	0.0285301	0.0896917	FALSE
YGR104C	SRB5	-0.138334	0.375325	0.572174	FALSE	0.0487315	0.691786	0.791368
YGR106C	VOA1	0.131971	0.00244515	0.0114909	FALSE
YGR108W	CLB1	0.158749	0.407922	0.600152	FALSE	-0.138084	4.11949	0.0138509
YGR110W	CLD1	0.202941	0.340913	0.533804	FALSE	-0.0253212	1.93019	0.264588
YGR111W	YGR111W	-0.274863	0.0053224	0.0228531	FALSE	-0.00233648	1.02798	0.640177
YGR112W	SHY1	-0.19661	0.275881	0.464036	FALSE
YGR113W	DAM1	-0.03249	0.768878	0.871313	FALSE
YGR114C	YGR114C	0.00391479	0.969784	0.984318	FALSE
YGR115C	YGR115C	0.00391479	0.969784	0.984318	FALSE
YGR116W	SPT6	0.0829627	0.465396	0.65233	FALSE
YGR117C	YGR117C	-0.179345	0.119471	0.265576	FALSE
YGR118W	RPS23A	-0.313346	0.0301643	0.09328	FALSE	-0.0134651	2.26251	0.175748
YGR119C	NUP57	-0.283881	0.0456985	0.127165	FALSE	0.0108581	0.574595	0.843016
YGR120C	COG2	0.148513	0.187064	0.358607	FALSE	0.364954	19.8569	0
YGR121C	MEP1	-0.173012	0.32526	0.516341	FALSE	-0.0672138	4.09997	0.0144495
YGR123C	PPT1	0.237861	0.194417	0.367974	FALSE
YGR124W	ASN2	-0.119719	0.13051	0.28205	FALSE
YGR125W	YGR125W	0.0022173	0.969731	0.984318	FALSE	0.0177579	1.24363	0.545957
YGR127W	YGR127W	-0.897942	0.000384978	0.00220225	FALSE	-0.115551	1.7855	0.308825
YGR128C	UTP8	-0.623069	6.63529e-05	0.000440018	FALSE	-0.0526619	0.873882	0.709059
YGR130C	YGR130C	-0.107707	0.173085	0.341366	FALSE	-0.0780445	6.53045	0.000821355
YGR131W	FHN1	0.714643	0.000840528	0.00445916	FALSE
YGR132C	PHB1	-0.24308	4.03816e-06	3.18517e-05	FALSE	-0.0632106	1.87805	0.282793
YGR133W	PEX4	0.0635134	0.721625	0.845595	FALSE	0.00917296	0.224348	0.97864
YGR135W	PRE9	-0.349855	1.20908e-08	1.28098e-07	FALSE
YGR136W	LSB1	0.012991	0.859706	0.925897	FALSE
YGR137W	YGR137W	0.012991	0.859706	0.925897	FALSE
YGR138C	TPO2	-0.0470559	0.679108	0.819093	FALSE	0.0641261	3.9661	0.0173497
YGR139W	YGR139W	-0.503465	0.0149808	0.0532204	FALSE
YGR140W	CBF2	-0.672952	0.00384719	0.0170505	FALSE	0.153827	3.37031	0.0366497
YGR142W	BTN2	-0.188673	0.338164	0.531825	FALSE	0.0197645	0.584869	0.839022
YGR144W	THI4	0.170276	0.450693	0.64053	FALSE	0.140837	1.77017	0.313834
YGR145W	ENP2	0.058524	0.745855	0.859352	FALSE
YGR147C	NAT2	-0.19058	0.0293972	0.0916254	FALSE	0.0290431	2.54526	0.121901
YGR148C	RPL24B	0.268627	8.54088e-55	4.77889e-53	TRUE	0.0322696	9.20509	0.000609756
YGR151C	YGR151C	-0.0626609	0.525643	0.704813	FALSE	0.150383	4.00217	0.015981
YGR152C	RSR1	-0.0426125	0.666654	0.809703	FALSE	0.0765727	1.47954	0.429508
YGR155W	CYS4	0.0182842	0.72506	0.848232	FALSE	0.0435428	4.57567	0.00645995
YGR156W	PTI1	-0.0857739	0.575913	0.746956	FALSE
YGR157W	CHO2	0.00671013	0.886096	0.9424	FALSE	0.111465	16.1352	0
YGR158C	MTR3	-0.0150521	0.880471	0.937546	FALSE	-0.0799947	2.29872	0.167205
YGR159C	NSR1	0.420599	0.0220325	0.0731895	FALSE	0.0272137	3.40387	0.0345327
YGR160W	YGR160W	0.481544	0.025458	0.0820065	FALSE
YGR161C	RTS3	0.299633	0.0196376	0.0668462	FALSE	0.290399	9.72766	0.000609756
YGR163W	GTR2	-0.200366	0.0748074	0.18642	FALSE	-0.0685574	3.78083	0.0204342
YGR164W	YGR164W	0.172029	0.315573	0.50653	FALSE
YGR165W	MRPS35	-0.0316354	0.827572	0.906557	FALSE	0.0412627	1.15553	0.581503
YGR166W	TRS65	-0.326196	0.0460064	0.127911	FALSE	-0.0856976	0.80448	0.737843
YGR167W	CLC1	-0.0206572	0.662026	0.807189	FALSE	-0.0287307	1.10131	0.60568
YGR168C	YGR168C	0.387263	0.0348029	0.104292	FALSE	0.107077	1.14893	0.583481
YGR169C	PUS6	-0.100083	0.654856	0.802993	FALSE	-0.172179	2.38876	0.150778
YGR169C-A	LSO2	-0.201554	0.00413809	0.0182045	FALSE	-0.0636834	3.15811	0.0475461
YGR170W	PSD2	0.0263989	0.869026	0.931174	FALSE	-0.14357	3.56516	0.0275749
YGR171C	MSM1	0.0239538	0.894759	0.947127	FALSE	-0.166375	1.8141	0.299703
YGR172C	YIP1	-0.166254	0.0092433	0.0357454	FALSE	0.0822979	3.56194	0.0277822
YGR173W	RBG2	-0.363031	0.005573	0.0238149	FALSE
YGR174C	CBP4	-0.0364898	0.579976	0.749781	FALSE
YGR174W-A	YGR174W-A	-0.25712	0.114609	0.257798	FALSE	-0.0846398	3.11974	0.0501554
YGR175C	ERG1	0.117957	0.0491823	0.134753	FALSE	0.0601877	3.52361	0.0298119
YGR177C	ATF2	0.536392	0.0302085	0.0933362	FALSE	0.671771	42.4974	0
YGR178C	PBP1	0.154347	0.0422178	0.120656	FALSE	0.12169	7.99865	0.000609756
YGR179C	OKP1	0.443137	0.0220316	0.0731895	FALSE	0.0118932	1.56531	0.396064
YGR180C	RNR4	-0.0902385	0.179287	0.348549	FALSE	-0.0134969	0.441331	0.903043
YGR181W	TIM13	-0.162573	0.00445627	0.0194609	FALSE	0.0975322	4.39739	0.0081381
YGR182C	YGR182C	0.0236406	0.352595	0.545769	FALSE	-0.0834187	0.762297	0.757281
YGR183C	QCR9	0.0833425	0.000687872	0.00370416	FALSE	0.0677594	3.78549	0.020203
YGR184C	UBR1	0.222104	0.173363	0.341366	FALSE
YGR185C	TYS1	-0.0144803	0.787845	0.886309	FALSE	-0.0103326	1.05342	0.628459
YGR187C	HGH1	-0.181377	0.145417	0.304524	FALSE	-0.0278813	0.891673	0.701739
YGR189C	CRH1	0.282444	0.0168165	0.0589237	FALSE	0.110389	3.26232	0.0415272
YGR191W	HIP1	-0.00449226	0.960036	0.978821	FALSE
YGR192C	TDH3	0.16366	3.31776e-33	1.22484e-31	FALSE
YGR194C	XKS1	-0.139775	0.314874	0.506087	FALSE	0.0717554	2.32029	0.162518
YGR195W	SKI6	0.118918	0.261866	0.449535	FALSE	0.0359495	0.447342	0.901341
YGR199W	PMT6	-0.0974481	0.41367	0.60587	FALSE	0.0851775	2.09515	0.217199
YGR200C	ELP2	0.225138	0.111328	0.252001	FALSE	0.160916	5.09483	0.00301205
YGR202C	PCT1	-0.054005	0.711296	0.841846	FALSE	-0.0189525	4.51582	0.00681818
YGR203W	YCH1	0.247061	0.00216644	0.0103717	FALSE	0.0660277	1.28823	0.523636
YGR204W	ADE3	0.100095	0.475446	0.660424	FALSE
YGR206W	MVB12	0.11295	0.115101	0.258255	FALSE	0.0345779	0.776153	0.751001
YGR208W	SER2	-0.160234	0.0425439	0.121172	FALSE	0.00482648	0.410471	0.915769
YGR209C	TRX2	0.136787	3.74233e-10	4.45225e-09	FALSE	-0.00516669	0.591703	0.837074
YGR211W	ZPR1	0.165292	0.124401	0.273022	FALSE	0.0760835	2.6941	0.0977009
YGR214W	RPS0A	0.215008	0.344019	0.536789	FALSE	0.0225386	1.57258	0.393008
YGR215W	RSM27	0.407589	0.00117206	0.00596185	FALSE	0.0881045	6.15365	0.00107914
YGR216C	GPI1	0.393515	0.00113613	0.00580383	FALSE	0.244712	5.65796	0.00201681
YGR218W	CRM1	-0.0822159	0.376062	0.573054	FALSE	-0.0216671	1.19316	0.566446
YGR219W	YGR219W	-0.296266	0.0977302	0.22859	FALSE
YGR220C	MRPL9	-0.296266	0.0977302	0.22859	FALSE	-0.0254424	0.626685	0.819048
YGR221C	TOS2	0.0535332	0.763203	0.867079	FALSE	-0.0728332	2.66233	0.103551
YGR222W	PET54	0.100314	0.318217	0.509454	FALSE	0.0241918	0.894802	0.700278
YGR227W	DIE2	-0.196914	0.251323	0.436863	FALSE	0.00950705	1.81801	0.297888
YGR228W	YGR228W	-0.438844	0.0615631	0.160449	FALSE
YGR229C	SMI1	-0.34956	0.114249	0.257636	FALSE	-0.268991	11.49	0
YGR230W	BNS1	-0.0271583	0.681353	0.819867	FALSE	0.245145	9.19227	0.000609756
YGR231C	PHB2	-0.0834601	0.221877	0.402504	FALSE	-0.0787946	3.02063	0.0581807
YGR232W	NAS6	0.104778	0.209437	0.389669	FALSE	0.0165019	1.34785	0.493205
YGR233C	PHO81	-0.309887	0.00351369	0.0159071	FALSE	-0.532173	27.5024	0
YGR234W	YHB1	-0.573647	2.05916e-18	4.14261e-17	FALSE	-0.57773	5.3618	0.00280374
YGR235C	MIC26	-0.286659	1.89666e-06	1.57952e-05	FALSE	-0.288313	27.7821	0
YGR237C	YGR237C	0.108015	0.581656	0.751139	FALSE
YGR239C	PEX21	-0.134226	0.254726	0.440664	FALSE	-0.290612	13.7167	0
YGR240C	PFK1	0.308049	1.41822e-06	1.20062e-05	FALSE	0.108035	10.812	0
YGR240C-A	YGR240C-A	-0.413919	0.00340508	0.0154545	FALSE
YGR241C	YAP1802	-0.0616508	0.720704	0.84521	FALSE	-0.0850479	1.78289	0.309692
YGR243W	MPC3	0.180695	0.245789	0.43019	FALSE	0.0363215	1.14958	0.583132
YGR244C	LSC2	-0.157565	0.304762	0.495844	FALSE	0.0240759	3.23445	0.0433483
YGR246C	BRF1	-0.0742781	0.717518	0.844081	FALSE	0.0280577	1.15172	0.582472
YGR247W	CPD1	-0.257077	0.288443	0.477759	FALSE	0.217201	4.71039	0.00499039
YGR248W	SOL4	0.10328	0.367266	0.564212	FALSE	0.0704793	1.18637	0.569154
YGR250C	RIE1	0.433209	0.000716696	0.00383631	FALSE	0.230455	4.92458	0.00335664
YGR251W	NOP19	-0.218432	0.167956	0.334511	FALSE	-0.287739	13.6291	0
YGR252W	GCN5	0.19319	0.0880797	0.211829	FALSE
YGR253C	PUP2	-0.125849	0.305413	0.496002	FALSE	-0.0480798	2.61494	0.110613
YGR254W	ENO1	-0.201178	6.65392e-08	6.58223e-07	FALSE	0.0586549	11.4076	0
YGR257C	MTM1	0.205967	0.0273369	0.0867851	FALSE	0.0445009	1.32482	0.506361
YGR260W	TNA1	0.0490013	0.615772	0.775781	FALSE
YGR264C	MES1	0.116725	0.105437	0.242033	FALSE	-0.0226824	0.511544	0.871896
YGR266W	YGR266W	0.110515	0.536678	0.715615	FALSE	0.0219112	0.882465	0.706024
YGR267C	FOL2	-0.38921	0.0224988	0.0740975	FALSE	0.0145431	2.13421	0.207948
YGR270W	YTA7	-0.0686785	0.63598	0.790504	FALSE	-0.0741688	2.24103	0.180099
YGR275W	RTT102	0.572504	6.2886e-07	5.53304e-06	FALSE	0.314164	24.4768	0
YGR276C	RNH70	0.606402	5.30926e-05	0.00035805	FALSE	0.26634	6.7146	0.000821355
YGR278W	CWC22	-0.0490141	0.78077	0.881166	FALSE	-0.224365	3.10431	0.051488
YGR279C	SCW4	0.168801	0.00625257	0.0260052	FALSE	0.00509531	0.352873	0.938792
YGR280C	PXR1	0.161486	0.17678	0.34555	FALSE	-0.0327253	0.942915	0.679638
YGR282C	BGL2	-0.100391	0.088929	0.213441	FALSE	0.00504519	1.38819	0.475008
YGR283C	YGR283C	-0.187212	0.419602	0.61106	FALSE	-0.0408382	0.585626	0.838841
YGR285C	ZUO1	0.114706	0.00278954	0.0129272	FALSE	-0.00707805	1.46609	0.436205
YGR287C	IMA1	-1.12352	1.36312e-09	1.57972e-08	FALSE	-0.237772	6.30534	0.000821355
YGR295C	COS6	-1.62604	1.74334e-17	3.30313e-16	FALSE	0.276326	3.44446	0.0327308
YHL001W	RPL14B	0.0517176	0.0661621	0.169233	FALSE	-0.0773958	16.1786	0
YHL004W	MRP4	0.179049	0.182034	0.351409	FALSE	0.155258	4.43702	0.00724095
YHL006C	SHU1	0.200949	0.226097	0.40768	FALSE	-0.202715	1.5566	0.399018
YHL007C	STE20	0.124452	0.350375	0.5441	FALSE	-0.00780304	1.98369	0.248596
YHL008C	YHL008C	0.564684	0.000312414	0.00182208	TRUE	-0.763152	19.2521	0
YHL009C	YAP3	-0.254268	0.280786	0.469132	FALSE	-0.0881054	0.890201	0.702426
YHL011C	PRS3	0.223239	0.0369264	0.109013	FALSE	0.0310716	1.50845	0.418603
YHL014C	YLF2	-0.223284	0.24007	0.423753	FALSE	-0.410683	8.03681	0.000609756
YHL015W	RPS20	-0.822096	0	0	FALSE	-0.312301	187.37	0
YHL016C	DUR3	-1.14998	7.07154e-07	6.17638e-06	FALSE	-1.8175	267.147	0
YHL017W	YHL017W	-0.126349	0.281007	0.469132	FALSE	-0.0401124	1.19431	0.56595
YHL019C	APM2	0.0284339	0.902898	0.951804	FALSE	0.137139	3.79132	0.019979
YHL020C	OPI1	-0.380189	1.40179e-08	1.48077e-07	FALSE	-0.172	31.7875	0
YHL023C	NPR3	0.51628	0.000207846	0.00125726	FALSE	-0.00479893	0.222449	0.979
YHL024W	RIM4	0.249115	0.0296737	0.092241	FALSE	0.143198	1.95547	0.257834
YHL026C	YHL026C	-0.033625	0.769803	0.872086	FALSE	0.143303	3.12213	0.0499106
YHL027W	RIM101	-0.158487	0.136589	0.289253	FALSE	0.0278193	0.603817	0.831747
YHL029C	OCA5	0.0236015	0.87626	0.93473	FALSE	0.0940821	2.19175	0.192707
YHL030W	ECM29	0.439441	0.016218	0.0571057	FALSE	0.103766	1.90775	0.271197
YHL031C	GOS1	0.171903	0.0302733	0.0934558	FALSE	0.182023	11.8794	0
YHL033C	RPL8A	0.0544238	0.651599	0.801295	FALSE	0.0987447	38.8229	0
YHL034C	SBP1	-0.0642964	0.216681	0.396916	FALSE	-0.00578306	0.349862	0.939963
YHL034W-A	YHL034W-A	-0.0556084	0.28965	0.479315	FALSE	-0.115296	0.162291	0.989164
YHL035C	VMR1	-0.036775	0.825238	0.905602	FALSE	-0.224313	37.9194	0
YHL036W	MUP3	0.0640201	0.654128	0.802478	FALSE	-0.0991034	4.39428	0.0081381
YHL038C	CBP2	-0.0157375	0.913828	0.957874	FALSE	-0.0677887	0.434049	0.905659
YHL039W	EFM1	-0.0272737	0.817236	0.902831	FALSE	-0.254404	10.3548	0.000609756
YHL040C	ARN1	0.0419029	0.727383	0.849758	FALSE	-0.203771	28.958	0
YHL048W	COS8	1.76445	1.88151e-11	2.55216e-10	FALSE	0.252806	1.88955	0.277423
YHR001W	OSH7	-0.193796	0.0254589	0.0820065	FALSE
YHR001W-A	QCR10	-0.0328924	0.198074	0.373318	FALSE	-0.0558716	2.79662	0.0827717
YHR003C	TCD1	0.0526268	0.812955	0.902294	FALSE	0.106334	3.69586	0.0229032
YHR004C	NEM1	-0.365462	0.0207616	0.0698096	FALSE	0.0213242	1.0462	0.631671
YHR005C-A	TIM10	0.315281	3.33825e-22	7.86465e-21	FALSE	0.0462111	5.29321	0.00280374
YHR007C	ERG11	-0.174957	3.91557e-05	0.000268614	FALSE	-0.0209958	1.86638	0.285638
YHR007C-A	YHR007C-A	0.152562	0.513424	0.694587	FALSE
YHR008C	SOD2	-0.0354653	0.510928	0.691733	FALSE
YHR009C	TDA3	0.100978	0.21696	0.397206	FALSE	0.485899	57.4944	0
YHR012W	VPS29	0.185674	0.0209605	0.0704125	FALSE	0.098914	3.91198	0.0193024
YHR013C	ARD1	0.188973	0.0457027	0.127165	FALSE	-0.0486211	1.95533	0.257867
YHR016C	YSC84	0.0960297	0.554885	0.730531	FALSE	0.0410394	0.93964	0.680692
YHR017W	YSC83	-0.0665317	0.713272	0.842979	FALSE	-0.00256631	0.608135	0.8297
YHR018C	ARG4	-0.395619	1.30736e-26	3.73085e-25	FALSE	-0.250034	58.6419	0
YHR019C	DED81	0.146648	0.000685664	0.00369784	FALSE
YHR020W	YHR020W	0.27234	2.04305e-05	0.000146911	FALSE
YHR023W	MYO1	0.0685706	0.723244	0.846939	FALSE	0.0391817	0.922548	0.688634
YHR024C	MAS2	0.0732966	0.64631	0.797256	FALSE	-0.109388	3.06661	0.0552489
YHR025W	THR1	0.0521925	0.400716	0.593943	FALSE	0.226309	18.7509	0
YHR026W	VMA16	0.0148513	0.639109	0.792411	FALSE	0.0268218	2.39841	0.149448
YHR027C	RPN1	0.149703	0.128233	0.278811	FALSE	-0.00370851	1.2248	0.553622
YHR028C	DAP2	0.00335472	0.970024	0.984318	FALSE	-0.0330415	0.937911	0.681314
YHR028W-A	YHR028W-A	-0.107784	0.453218	0.641745	FALSE
YHR029C	YHI9	0.161164	0.0861068	0.207922	FALSE	0.0431667	3.65545	0.0243329
YHR033W	YHR033W	-0.432896	0.00685089	0.0280057	FALSE	-1.08703	66.0376	0
YHR034C	PIH1	0.231112	0.222382	0.40301	FALSE	-0.0382844	0.88861	0.703167
YHR035W	NEL1	0.439328	0.0455651	0.126979	FALSE	0.435418	6.63753	0.000821355
YHR036W	BRL1	-0.090931	0.629034	0.785136	FALSE	-0.159528	4.15265	0.0127081
YHR037W	PUT2	-0.267325	0.00364685	0.0163651	FALSE	-0.219089	8.57789	0.000609756
YHR038W	RRF1	-0.0803779	0.231513	0.41349	FALSE
YHR039C	MSC7	0.169018	0.00938933	0.0360764	FALSE
YHR039C-A	VMA10	0.0142709	0.641369	0.793622	FALSE
YHR040W	BCD1	0.0633137	0.754891	0.862285	FALSE
YHR041C	SRB2	-0.00190109	0.984178	0.993332	FALSE
YHR043C	DOG2	0.316469	3.22532e-06	2.59548e-05	FALSE
YHR044C	DOG1	1.0392	2.17673e-32	7.64203e-31	FALSE
YHR046C	INM1	-0.147247	0.368933	0.566182	FALSE	-0.0792318	1.10033	0.605974
YHR049W	FSH1	0.0200284	0.756284	0.863325	FALSE
YHR050W	SMF2	0.0436141	0.711467	0.841846	FALSE	0.124783	6.2928	0.000821355
YHR051W	COX6	0.13231	0.00615284	0.0257399	FALSE	-0.0208219	2.40166	0.148945
YHR052W	CIC1	0.288335	0.136067	0.288487	FALSE	-0.0265527	1.35057	0.491665
YHR057C	CPR2	0.271569	0.00236552	0.0111901	FALSE	0.0276063	0.681156	0.794944
YHR058C	MED6	-0.140771	0.448728	0.638925	FALSE
YHR060W	VMA22	0.14607	0.10427	0.239659	FALSE	-0.0376691	2.4106	0.147368
YHR061C	GIC1	0.066512	0.740791	0.857947	FALSE	0.0300358	1.56921	0.394488
YHR063C	PAN5	-0.120107	0.398874	0.591947	FALSE	-0.01418	1.19162	0.567107
YHR063W-A	YHR063W-A	-0.183796	0.000919029	0.00481851	FALSE
YHR064C	SSZ1	-0.152362	0.00445271	0.0194609	FALSE	-0.00702166	0.760646	0.757925
YHR065C	RRP3	0.348091	0.0112927	0.0418623	FALSE	0.286775	18.6693	0
YHR066W	SSF1	0.175861	0.165874	0.332212	FALSE	0.0986609	2.73394	0.0913502
YHR067W	HTD2	-0.24688	0.0705844	0.178253	FALSE	-0.157559	7.03061	0.000821355
YHR068W	DYS1	-0.245902	1.86479e-05	0.000135179	FALSE	-0.142848	21.4758	0
YHR069C	RRP4	-0.323647	0.00234269	0.0111135	FALSE	-0.0431018	2.69447	0.097644
YHR071C-A	YHR071C-A	-0.393043	0.11456	0.257798	FALSE
YHR071W	PCL5	0.101671	0.534763	0.713482	FALSE
YHR072W-A	NOP10	-0.0722069	0.0131756	0.0476585	FALSE
YHR073W	OSH3	0.0044737	0.975524	0.987939	FALSE
YHR074W	QNS1	-0.213796	0.0726056	0.182032	FALSE	0.0447597	1.63238	0.371092
YHR075C	PPE1	-0.323888	0.00412455	0.0181673	FALSE	-0.0502113	1.07675	0.616852
YHR076W	PTC7	0.131928	0.394997	0.589369	FALSE	0.179041	6.27649	0.000821355
YHR077C	NMD2	0.0497007	0.747013	0.859593	FALSE	0.0146784	1.09383	0.609627
YHR078W	YHR078W	0.129936	0.380077	0.57623	FALSE	-0.0268997	3.18581	0.0465735
YHR080C	LAM4	-0.057292	0.623569	0.779951	FALSE
YHR081W	LRP1	-0.215492	0.0439745	0.123994	FALSE
YHR083W	SAM35	-0.247312	0.0176507	0.0611881	FALSE
YHR085W	IPI1	-0.331357	0.0585138	0.153959	FALSE	0.0204493	0.444089	0.902262
YHR086W	NAM8	-0.200107	0.220922	0.401275	FALSE	-0.122309	1.84699	0.291084
YHR089C	GAR1	-0.0588436	0.108803	0.248009	FALSE	-0.123607	18.6156	0
YHR090C	YNG2	-0.177496	0.183413	0.353309	FALSE
YHR091C	MSR1	-0.191184	0.37732	0.573751	FALSE
YHR092C	HXT4	0.0562558	0.50844	0.689929	FALSE
YHR094C	HXT1	-0.172935	0.00149937	0.00742633	FALSE
YHR097C	YHR097C	-0.0510812	0.706093	0.837389	FALSE	0.0502833	2.84506	0.0782267
YHR098C	SFB3	-0.191419	0.185434	0.355886	FALSE
YHR099W	TRA1	-0.0282201	0.850492	0.920681	FALSE	-0.0379507	0.787567	0.746375
YHR100C	GEP4	0.0813107	0.428493	0.620725	FALSE	0.0398258	1.88545	0.279532
YHR101C	BIG1	0.045111	0.828759	0.907303	FALSE	0.0713822	1.15562	0.581479
YHR104W	GRE3	-0.111102	0.132466	0.284537	FALSE	0.00675516	1.58534	0.388213
YHR106W	TRR2	-0.270567	0.0422102	0.120656	FALSE
YHR107C	CDC12	-0.165052	0.0540787	0.145006	FALSE
YHR108W	GGA2	-0.329949	0.000570458	0.00312835	FALSE
YHR109W	CTM1	0.476102	0.0254351	0.0820065	FALSE
YHR110W	ERP5	-0.407371	0.0197634	0.0672106	FALSE	0.0224127	1.27046	0.532085
YHR111W	UBA4	-0.21522	0.167712	0.334397	FALSE	0.0875327	2.53475	0.12389
YHR112C	YHR112C	-0.32775	0.0540989	0.145006	FALSE	0.0275756	1.34246	0.496382
YHR113W	APE4	-0.0807359	0.345734	0.538527	FALSE	-0.223678	14.6957	0
YHR114W	BZZ1	0.669412	0.000211297	0.00127597	FALSE	0.255986	7.78511	0.000609756
YHR115C	DMA1	0.841149	9.46978e-09	1.01228e-07	FALSE	0.758216	67.5655	0
YHR116W	COX23	0.221034	0.00810158	0.0319186	FALSE	0.142975	3.16046	0.0473277
YHR117W	TOM71	0.241829	0.150201	0.310191	FALSE	0.0854726	1.84558	0.291464
YHR120W	MSH1	0.30116	0.159798	0.324213	FALSE	0.0946739	1.67777	0.352397
YHR121W	LSM12	-0.241141	3.94512e-05	0.000270124	FALSE
YHR122W	CIA2	0.159838	0.0665366	0.169948	FALSE
YHR127W	YHR127W	-0.0348858	0.805785	0.898635	FALSE	-0.253528	8.7803	0.000609756
YHR128W	FUR1	0.138152	0.0265798	0.0845315	FALSE	-0.188992	21.1051	0
YHR130C	YHR130C	-0.338951	0.0600529	0.157482	FALSE	0.0238277	0.943632	0.679411
YHR132C	ECM14	0.0179545	0.807081	0.898982	FALSE
YHR132W-A	IGO2	0.408983	1.58389e-07	1.49654e-06	FALSE
YHR133C	NSG1	-0.218264	0.0295255	0.0919398	FALSE
YHR134W	WSS1	0.27525	0.181954	0.351409	FALSE	0.0569442	0.323298	0.948249
YHR137W	ARO9	1.03739	2.45279e-15	4.0664e-14	FALSE
YHR138C	YHR138C	0.736979	3.52586e-18	6.86202e-17	FALSE	0.37007	32.0814	0
YHR143W	DSE2	-0.0525189	0.412671	0.605638	FALSE	-0.0572741	0.633321	0.816676
YHR143W-A	RPC10	0.402436	4.2409e-15	6.87179e-14	FALSE	0.0263923	1.1187	0.599167
YHR146W	CRP1	-0.133428	0.322608	0.513448	FALSE
YHR147C	MRPL6	0.303735	1.47736e-07	1.41455e-06	FALSE	0.0238584	0.691157	0.791652
YHR148W	IMP3	0.178663	0.195757	0.369729	FALSE	-0.0436962	1.18256	0.570568
YHR150W	PEX28	-0.188914	0.383066	0.578313	FALSE	0.0668082	2.20241	0.190602
YHR151C	MTC6	-0.34354	0.0450636	0.126072	FALSE	-0.231678	7.08249	0.000821355
YHR152W	SPO12	0.316295	0.0105871	0.0396157	FALSE	0.0398238	1.17496	0.573755
YHR154W	RTT107	0.269783	0.209953	0.390113	FALSE	-0.01892	0.520155	0.868533
YHR161C	YAP1801	-0.0472531	0.648778	0.799199	FALSE	0.0087302	1.05736	0.62677
YHR162W	MPC2	-0.100371	1.05115e-06	8.98367e-06	FALSE
YHR163W	SOL3	-0.13319	0.00107696	0.00556506	FALSE	0.00309552	1.67201	0.353756
YHR165C	PRP8	-0.0920681	0.608218	0.769621	FALSE	-0.0411328	1.94641	0.260271
YHR168W	MTG2	0.234889	0.250843	0.436689	FALSE	-0.139254	1.47905	0.429761
YHR169W	DBP8	-0.131628	0.315396	0.506472	FALSE	-0.125268	4.99103	0.00335664
YHR171W	ATG7	0.250917	0.202873	0.379929	FALSE	0.0913244	2.4313	0.142972
YHR174W	ENO2	0.100814	0.48134	0.666422	FALSE
YHR175W	CTR2	0.230641	0.000117778	0.000736061	FALSE	-0.0277452	0.974105	0.667532
YHR176W	FMO1	-0.0949116	0.44917	0.639299	FALSE
YHR178W	STB5	-0.0852634	0.60663	0.768971	FALSE
YHR179W	OYE2	0.118202	0.331171	0.523587	FALSE	0.0187145	0.943014	0.679607
YHR183W	GND1	-0.184859	8.57886e-09	9.2255e-08	FALSE	-0.0311095	4.57231	0.00645995
YHR186C	KOG1	-0.367937	0.133765	0.285939	FALSE	-0.148574	2.2568	0.17696
YHR187W	IKI1	-0.0409238	0.696682	0.831538	FALSE	0.16058	5.12796	0.00301205
YHR188C	GPI16	-0.114683	0.251987	0.437385	FALSE	0.000845141	1.73643	0.324893
YHR190W	ERG9	-0.0639622	0.256018	0.442258	FALSE	-0.035044	1.08162	0.614429
YHR191C	CTF8	-0.0838732	0.117335	0.262118	FALSE	-0.00295275	0.486795	0.883169
YHR192W	LNP1	0.449867	0.000637257	0.00345237	FALSE	-0.033979	1.10631	0.604191
YHR193C	EGD2	0.110496	9.78773e-11	1.23851e-09	FALSE
YHR195W	NVJ1	0.128986	0.441094	0.631824	FALSE	0.031836	3.42003	0.0340167
YHR196W	UTP9	0.020135	0.811282	0.901234	FALSE	0.0343834	1.18881	0.568249
YHR197W	RIX1	-0.163512	0.453127	0.641745	FALSE	-0.149759	3.94701	0.0181136
YHR198C	AIM18	-0.0317081	0.748766	0.860504	FALSE	0.0617341	0.993355	0.657938
YHR200W	RPN10	-0.15597	0.0311455	0.0952453	FALSE	-0.00185756	0.76101	0.757783
YHR201C	PPX1	-0.156206	0.0280589	0.0886059	FALSE	-0.0767657	1.83773	0.2933
YHR203C	RPS4B	-1.15341	2.94313e-32	1.02324e-30	FALSE	-0.0126952	2.0804	0.220315
YHR207C	SET5	-0.169076	0.442823	0.633286	FALSE	0.103134	1.64819	0.364486
YHR208W	BAT1	0.0725482	0.359782	0.554858	FALSE	0.0514874	3.58568	0.0267429
YHR209W	CRG1	-0.0941333	0.572487	0.744379	FALSE	0.139899	0.919074	0.690564
YHR216W	IMD2	-0.792034	8.04569e-06	6.09125e-05	FALSE	0.567705	11.0632	0
YIL002C	INP51	-0.363206	1.86367e-07	1.73797e-06	FALSE	-0.0455071	0.458866	0.896121
YIL002W-A	YIL002W-A	-0.415449	6.63537e-10	7.79058e-09	FALSE	-0.160105	12.9926	0
YIL003W	CFD1	-0.194668	0.178794	0.347937	FALSE
YIL004C	BET1	-0.342782	7.19356e-05	0.000474404	FALSE	0.0482549	1.23943	0.547733
YIL005W	EPS1	-0.188072	0.0153246	0.0543339	FALSE	0.00556658	0.336969	0.943853
YIL006W	YIA6	-0.00444862	0.980235	0.99026	FALSE	-0.0429349	0.877757	0.707863
YIL007C	NAS2	-0.238122	0.0185292	0.0638011	FALSE	-0.0612549	0.793298	0.743447
YIL008W	URM1	-0.274171	0.00862422	0.0336054	FALSE	0.0312568	1.5932	0.385646
YIL009C-A	EST3	0.270823	0.00937699	0.0360677	FALSE
YIL009W	FAA3	-0.0160448	0.871488	0.932652	TRUE
YIL010W	DOT5	0.266583	0.000473756	0.00263845	FALSE	0.234567	24.7737	0
YIL014C-A	YIL014C-A	1.53837	3.996e-33	1.46017e-31	FALSE	0.851203	83.0254	0
YIL016W	SNL1	-0.15601	0.0172683	0.0602119	FALSE
YIL017C	VID28	0.403138	0.0549075	0.146406	FALSE	0.0650381	2.07951	0.220526
YIL018W	RPL2B	0.359062	1.04181e-112	1.43489e-110	TRUE	0.00238416	0.92991	0.684217
YIL019W	FAF1	0.0951108	0.481308	0.666422	FALSE
YIL020C	HIS6	0.27673	0.101744	0.235697	FALSE	-0.0769046	2.53425	0.123942
YIL022W	TIM44	-0.104156	0.263269	0.450008	FALSE	0.0678299	2.48654	0.133105
YIL024C	YIL024C	0.305786	0.210412	0.390113	FALSE	0.180766	2.33964	0.158656
YIL026C	IRR1	0.0132972	0.942644	0.96861	FALSE	-0.0440803	0.550434	0.853863
YIL030C	SSM4	0.054146	0.668025	0.810549	FALSE	-0.0476698	0.56198	0.848738
YIL033C	BCY1	-0.234512	0.0090554	0.0350566	FALSE	-0.0653275	2.77663	0.0854956
YIL034C	CAP2	0.0372636	0.608481	0.769683	FALSE	0.0548304	2.00101	0.242466
YIL035C	CKA1	0.0592859	0.517955	0.698606	FALSE	-0.0306089	1.01026	0.64829
YIL036W	CST6	-0.0405128	0.793291	0.889689	FALSE
YIL038C	NOT3	0.0854804	0.546697	0.723831	FALSE	0.0163961	0.499004	0.877636
YIL040W	APQ12	-0.384742	2.29819e-12	3.27881e-11	FALSE
YIL041W	GVP36	0.223147	0.0128733	0.0466593	FALSE
YIL042C	PKP1	-0.135042	0.405295	0.597733	FALSE
YIL043C	CBR1	0.358377	4.25896e-09	4.70562e-08	FALSE	0.262624	49.2452	0
YIL044C	AGE2	-0.229146	0.0735944	0.184166	FALSE	-0.115792	4.23986	0.0114695
YIL045W	PIG2	-0.370189	0.0785228	0.193791	FALSE
YIL048W	NEO1	-0.122602	0.544706	0.722319	FALSE	0.0162753	0.809025	0.736484
YIL050W	PCL7	-0.0701375	0.440351	0.631264	FALSE	0.030602	1.64441	0.366215
YIL051C	MMF1	0.218226	9.67975e-11	1.22919e-09	FALSE
YIL052C	RPL34B	-0.422678	0.00242602	0.011431	FALSE	0.00359551	1.08735	0.612654
YIL063C	YRB2	-0.0132357	0.874249	0.933765	FALSE	-0.0652752	2.08681	0.218586
YIL064W	EFM4	0.345876	0.0246657	0.0802251	FALSE	-0.0139185	1.08066	0.614728
YIL065C	FIS1	-0.375766	3.27784e-06	2.63183e-05	FALSE	-0.0477938	1.65266	0.362552
YIL069C	RPS24B	0.307795	7.76819e-06	5.90614e-05	FALSE	-0.0165125	1.56779	0.395063
YIL070C	MAM33	0.28278	0.0513674	0.139248	FALSE	0.0692761	1.67737	0.352493
YIL071C	PCI8	0.467748	0.0578794	0.152964	FALSE	0.383013	9.90114	0.000609756
YIL072W	HOP1	-0.21484	0.295355	0.485391	FALSE	-0.347622	3.42575	0.0336427
YIL075C	RPN2	0.0558949	0.573114	0.744404	FALSE
YIL076W	SEC28	-0.0341422	0.593045	0.759982	FALSE	0.113068	9.11553	0.000609756
YIL078W	THS1	-0.191309	0.0426665	0.121261	FALSE	-0.0457322	3.62889	0.0252815
YIL079C	AIR1	0.218199	0.265763	0.452234	FALSE	0.0379387	0.325368	0.947424
YIL084C	SDS3	0.518749	0.0170699	0.0596363	FALSE	-0.0619654	0.819287	0.733254
YIL085C	KTR7	-0.0678815	0.714703	0.843557	FALSE	0.0385662	0.817325	0.733875
YIL086C	YIL086C	-0.751279	8.93582e-08	8.74294e-07	FALSE
YIL087C	AIM19	-0.852086	7.2916e-06	5.60327e-05	FALSE	-0.475737	52.7727	0
YIL090W	ICE2	0.0870111	0.67813	0.818464	FALSE	0.0513905	0.815086	0.734584
YIL091C	UTP25	0.0863333	0.541757	0.720666	FALSE	0.0381004	1.80769	0.302107
YIL092W	YIL092W	-0.0958663	0.562239	0.737501	FALSE	0.368319	6.33261	0.000821355
YIL093C	RSM25	-0.0850681	0.347243	0.540314	FALSE	0.0178903	0.408245	0.916532
YIL094C	LYS12	-0.0132246	0.737767	0.855828	FALSE	-0.122184	37.1219	0
YIL095W	PRK1	-0.472171	0.022866	0.0751221	FALSE	0.0162675	1.29093	0.52224
YIL096C	BMT5	-0.171182	0.345137	0.538065	FALSE	0.261533	8.66262	0.000609756
YIL097W	FYV10	-0.426264	0.0299708	0.0927618	FALSE	-0.173472	2.48004	0.13443
YIL102C-A	YIL102C-A	-0.138039	0.436816	0.628209	FALSE	0.182874	4.96419	0.00335664
YIL103W	DPH1	-0.00220601	0.992695	0.99799	FALSE	-0.0487556	0.6613	0.804778
YIL111W	COX5B	-0.180878	0.138723	0.292518	FALSE	-0.165361	6.20822	0.000821355
YIL112W	HOS4	0.152776	0.454379	0.643051	FALSE	0.0179486	2.73012	0.0919835
YIL113W	SDP1	-0.277444	0.0994992	0.231981	FALSE	-0.228117	4.51134	0.00681818
YIL114C	POR2	0.166401	0.167573	0.334307	FALSE	0.0575241	0.832324	0.727363
YIL115C	NUP159	-0.0438887	0.740757	0.857947	FALSE	0.0633095	3.36729	0.0367758
YIL115W-A	YIL115W-A	-0.0724256	0.662655	0.807554	FALSE
YIL122W	POG1	0.111486	0.639284	0.792411	FALSE	0.193547	3.38431	0.0358221
YIL123W	SIM1	-0.0652363	0.35056	0.544151	FALSE	-0.0161181	0.601601	0.832798
YIL126W	STH1	-0.103075	0.513777	0.694802	FALSE	-0.0214477	0.869872	0.710329
YIL127C	RRT14	0.0922758	0.412806	0.605638	FALSE	-0.00440252	0.0930165	0.997054
YIL128W	MET18	-0.074108	0.73894	0.856635	FALSE	0.0206609	0.701873	0.78674
YIL130W	ASG1	0.00212289	0.992236	0.997808	FALSE	0.220402	4.98744	0.00335664
YIL133C	RPL16A	0.0630155	0.00752444	0.0300056	FALSE	0.0195265	2.3296	0.16015
YIL134W	FLX1	0.504317	1.64464e-06	1.37926e-05	FALSE
YIL135C	VHS2	0.126034	0.284641	0.472993	FALSE	-0.00510067	1.10657	0.604113
YIL136W	OM45	0.092521	0.318111	0.509454	FALSE	-0.00997678	1.38947	0.474568
YIL139C	REV7	-0.302253	0.0305956	0.0939647	FALSE	0.125782	3.13205	0.0490211
YIL140W	AXL2	-0.29968	0.0412239	0.118491	FALSE	-0.0243266	0.365838	0.933667
YIL143C	SSL2	0.112319	0.596567	0.760958	FALSE	0.0371969	4.44516	0.00724095
YIL149C	MLP2	0.0731785	0.661759	0.807189	FALSE	-0.0462469	1.72533	0.330566
YIL153W	RRD1	0.217695	0.0407535	0.117504	FALSE	-0.100389	7.79881	0.000609756
YIL155C	GUT2	0.410917	0.0105426	0.0395318	FALSE
YIL156W	UBP7	-0.138164	0.527692	0.706681	FALSE	-0.00818645	1.12277	0.59689
YIL156W-A	YIL156W-A	0.0589061	0.131394	0.283106	FALSE
YIL156W-B	YIL156W-B	0.000827696	0.98224	0.991655	FALSE	1.26525e-06	1.27889	0.529343
YIL157C	COA1	0.036366	0.565863	0.740505	FALSE
YIL158W	AIM20	-0.0441356	0.530091	0.708581	FALSE	-0.0426273	0.713797	0.781105
YIL161W	YIL161W	0.488563	0.0018093	0.00879117	FALSE	0.218167	5.15742	0.00301205
YIL162W	SUC2	2.6083	4.07814e-16	7.18341e-15	FALSE
YIL165C	YIL165C	0.419127	2.24923e-10	2.77741e-09	FALSE	0.368566	197.05	0
YIL166C	YIL166C	1.2164	1.92438e-05	0.000139216	FALSE	-1.2865	111.691	0
YIR002C	MPH1	-0.48352	0.0148101	0.0526664	FALSE	-0.0911484	2.11422	0.21232
YIR004W	DJP1	0.0178549	0.874107	0.933765	FALSE	0.0323788	0.700974	0.787182
YIR005W	IST3	-0.20431	0.0679005	0.172939	FALSE	-0.211517	5.56054	0.00201681
YIR006C	PAN1	0.128209	0.352669	0.545769	FALSE	0.0146591	1.61613	0.376981
YIR010W	DSN1	0.276753	0.14765	0.307223	FALSE	0.0261572	2.37067	0.153711
YIR012W	SQT1	0.539904	0.00089506	0.00471354	FALSE	0.015205	0.446508	0.901577
YIR014W	YIR014W	-0.302829	0.146606	0.305941	FALSE
YIR016W	YIR016W	0.0415436	0.699562	0.833157	FALSE
YIR017C	MET28	0.458198	6.98854e-11	9.10036e-10	FALSE
YIR021W	MRS1	-0.084315	0.578837	0.74912	FALSE	-0.197974	3.52292	0.0298574
YIR024C	INA22	0.0406138	0.791592	0.888427	FALSE	-0.0926871	1.14383	0.586209
YIR028W	DAL4	-0.574466	0.00149633	0.00742156	FALSE	-0.715415	17.9291	0
YIR029W	DAL2	-0.58255	0.000968523	0.0050558	FALSE	-0.286252	4.6928	0.005
YIR030C	DCG1	-0.618551	7.45386e-07	6.49447e-06	FALSE	-0.585185	6.4348	0.000821355
YIR030W-A	YIR030W-A	-0.172138	0.0286533	0.0896917	FALSE
YIR031C	DAL7	-0.172138	0.0286533	0.0896917	FALSE	-0.106493	1.66068	0.359137
YIR032C	DAL3	-0.248213	0.0537051	0.14476	FALSE	-0.129473	4.29598	0.0100073
YIR033W	MGA2	0.00322948	0.985605	0.993652	FALSE	-0.000232298	0.779673	0.749127
YIR034C	LYS1	-0.195239	0.00114456	0.00583856	FALSE	-0.0054909	1.57414	0.392303
YIR035C	YIR035C	-0.167148	0.0122807	0.0446924	FALSE
YIR036C	IRC24	0.0322928	0.799395	0.894573	FALSE
YIR037W	HYR1	-0.03694	0.37297	0.569683	FALSE
YIR038C	GTT1	0.118219	0.0407152	0.117504	FALSE	0.019625	0.37958	0.928045
YJL001W	PRE3	-0.0508656	0.205044	0.382828	FALSE	-0.0271267	2.52659	0.125011
YJL004C	SYS1	0.264693	0.252733	0.43785	FALSE	-0.0185044	0.891017	0.702045
YJL013C	MAD3	0.0148665	0.932152	0.963318	FALSE	0.130478	2.82723	0.0789409
YJL014W	CCT3	-0.139506	0.14677	0.306032	FALSE	-0.0520905	2.12912	0.209122
YJL020C	BBC1	-0.20826	0.0225127	0.0740975	FALSE
YJL023C	PET130	-0.174647	0.318994	0.50987	FALSE
YJL024C	APS3	-0.138014	0.158874	0.322704	FALSE	-0.0562596	1.97486	0.251582
YJL025W	RRN7	0.264903	0.225971	0.407659	FALSE	0.152943	2.18102	0.196182
YJL029C	VPS53	0.0689745	0.593221	0.759982	FALSE
YJL030W	MAD2	0.185218	0.119778	0.266082	FALSE	-0.0952485	3.6945	0.022949
YJL031C	BET4	0.265145	0.0718766	0.180625	FALSE	0.00172168	2.30227	0.166304
YJL032W	YJL032W	0.226727	0.127047	0.276958	FALSE
YJL034W	KAR2	-0.0390153	0.842261	0.915924	FALSE	0.0416081	1.65522	0.361486
YJL035C	TAD2	0.871507	1.15142e-07	1.1084e-06	FALSE	0.448359	19.8799	0
YJL037W	IRC18	-0.0309843	0.893289	0.946131	FALSE	1.25272	58.2813	0
YJL044C	GYP6	0.00906189	0.934318	0.964474	FALSE	0.181325	8.08406	0.000609756
YJL049W	CHM7	0.107123	0.632139	0.787644	FALSE	0.0927966	1.84245	0.292303
YJL051W	IRC8	-0.17728	0.340355	0.533804	FALSE	-0.100945	1.52739	0.410614
YJL052W	TDH1	0.426727	0.00966787	0.0369484	FALSE
YJL055W	YJL055W	0.176	0.000212617	0.00128179	FALSE	0.0197483	1.25699	0.539165
YJL060W	BNA3	0.303462	0.000402371	0.00229076	FALSE	0.0712119	3.57379	0.0271761
YJL061W	NUP82	0.151964	0.386515	0.581071	FALSE	0.0876508	2.13084	0.208741
YJL063C	MRPL8	0.123619	0.0260356	0.0832442	FALSE
YJL065C	DLS1	-0.182964	0.0538993	0.144865	FALSE
YJL068C	YJL068C	-0.475187	6.42406e-05	0.000426801	FALSE
YJL069C	UTP18	-0.0232686	0.863773	0.928997	FALSE	-0.0155343	1.10202	0.605469
YJL071W	ARG2	-0.40829	0.051221	0.139062	FALSE	-0.125991	1.60958	0.379046
YJL072C	PSF2	0.147676	0.20176	0.378869	FALSE	0.240926	13.5675	0
YJL073W	JEM1	0.117314	0.303664	0.495521	FALSE	-0.408675	15.3034	0
YJL079C	PRY1	-0.103717	0.152916	0.313883	FALSE	-0.0673823	4.3973	0.0081381
YJL080C	SCP160	0.193919	0.0500717	0.136563	FALSE	0.0644787	2.60858	0.111263
YJL088W	ARG3	0.776928	6.50518e-06	5.05315e-05	FALSE	0.0656936	3.86673	0.0197425
YJL091C	GWT1	0.164856	0.169851	0.337161	FALSE	-0.0383782	1.09621	0.608253
YJL094C	KHA1	0.240472	0.201628	0.37882	FALSE	-0.0673111	3.16203	0.0472185
YJL099W	CHS6	0.212428	0.27095	0.457676	FALSE	-0.0846954	0.908192	0.695105
YJL101C	GSH1	-0.173532	0.133518	0.285938	FALSE	-0.0751395	2.3003	0.166796
YJL103C	GSM1	0.11208	0.552998	0.72885	FALSE	0.226649	2.21821	0.186213
YJL104W	PAM16	-0.305102	8.80527e-09	9.44062e-08	FALSE	-0.0820878	5.22136	0.00301205
YJL115W	ASF1	0.0536892	0.622442	0.779377	FALSE
YJL117W	PHO86	0.180882	0.0263779	0.0841882	FALSE
YJL118W	YJL118W	0.481347	0.0159932	0.0564253	FALSE	0.0824426	3.04877	0.0568848
YJL121C	RPE1	0.0194325	0.75017	0.860998	FALSE	0.0357222	1.49358	0.424157
YJL123C	MTC1	-0.172138	0.0330873	0.100242	FALSE
YJL125C	GCD14	-0.148736	0.320208	0.510764	FALSE	-0.124209	3.94438	0.0183319
YJL129C	TRK1	0.0991354	0.653267	0.801971	FALSE	0.0515826	1.19173	0.567062
YJL130C	URA2	0.277203	1.49372e-07	1.4264e-06	FALSE	0.112151	17.5545	0
YJL132W	YJL132W	0.0829423	0.709034	0.839633	FALSE	0.0234131	0.338936	0.943365
YJL133C-A	YJL133C-A	0.213028	2.13212e-18	4.26544e-17	FALSE
YJL134W	LCB3	0.261397	0.0600729	0.157482	FALSE
YJL137C	GLG2	0.242576	0.230685	0.412628	FALSE	0.00426921	0.986409	0.661722
YJL139C	YUR1	0.388143	5.33712e-07	4.76614e-06	FALSE	-0.0233919	0.864018	0.713594
YJL140W	RPB4	0.418509	4.4974e-07	4.05672e-06	FALSE	0.0866265	6.83386	0.000821355
YJL141C	YAK1	-0.147004	0.240526	0.424089	FALSE	-0.130509	1.90347	0.272724
YJL142C	IRC9	-0.214897	0.00174094	0.00848205	FALSE	0.0725556	1.82409	0.295937
YJL143W	TIM17	-0.257389	5.80933e-07	5.13659e-06	FALSE	0.00221217	1.36955	0.483313
YJL145W	SFH5	0.150966	0.134198	0.28605	FALSE
YJL146W	IDS2	0.444273	0.0189075	0.0647922	FALSE
YJL147C	MRX5	-0.038829	0.835707	0.911938	FALSE
YJL148W	RPA34	0.0729496	0.302011	0.493836	FALSE
YJL151C	SNA3	0.491895	1.30578e-28	3.99657e-27	FALSE
YJL152W	YJL152W	0.490242	1.72749e-28	5.2425e-27	FALSE
YJL153C	INO1	-0.451507	0.00134508	0.00671789	FALSE
YJL154C	VPS35	-0.55314	0.000182334	0.00111233	FALSE	0.0642938	1.65932	0.35978
YJL155C	FBP26	0.0936607	0.621916	0.779377	FALSE	0.0786878	1.11563	0.600553
YJL156W-A	YJL156W-A	0.047755	0.811403	0.901234	FALSE
YJL158C	CIS3	0.485953	0.000154573	0.000954355	FALSE
YJL159W	HSP150	-0.263485	0.0844441	0.204597	FALSE
YJL165C	HAL5	0.264702	2.69813e-19	5.55287e-18	FALSE
YJL166W	QCR8	0.318448	4.02123e-37	1.71429e-35	TRUE
YJL167W	ERG20	0.46156	0.00011004	0.000691322	FALSE	0.0213834	4.36465	0.00905753
YJL171C	TOH1	0.130511	0.0255118	0.0820086	FALSE	-0.0630181	1.81558	0.299017
YJL173C	RFA3	0.0551833	0.33507	0.528119	FALSE
YJL174W	KRE9	-0.0875265	0.324704	0.516097	FALSE
YJL176C	SWI3	-0.136264	0.489423	0.671761	FALSE
YJL177W	RPL17B	0.30015	2.58642e-41	1.21868e-39	FALSE
YJL178C	ATG27	-0.0607874	0.234443	0.416439	FALSE	-0.039414	1.75122	0.319285
YJL179W	PFD1	-0.0274338	0.56656	0.740505	FALSE	0.0011025	2.16596	0.199845
YJL180C	ATP12	0.0556382	0.64978	0.799884	FALSE
YJL181W	RBH1	0.0373524	0.770737	0.872592	FALSE
YJL183W	MNN11	-0.138843	0.0730388	0.182903	FALSE
YJL184W	GON7	-0.315961	7.30511e-05	0.000480875	FALSE
YJL185C	ATG36	0.175891	0.251961	0.437385	FALSE
YJL186W	MNN5	0.102027	0.265375	0.452234	FALSE	0.0400877	0.597747	0.834513
YJL187C	SWE1	0.153534	0.44604	0.636594	FALSE	0.0720762	1.27164	0.531699
YJL188C	BUD19	0.292568	1.19634e-111	1.53003e-109	FALSE
YJL189W	RPL39	0.292497	1.02804e-111	1.36348e-109	FALSE	0.0246418	4.20614	0.0117558
YJL190C	RPS22A	-0.0142409	0.149725	0.309565	FALSE	0.0302481	6.76672	0.000821355
YJL191W	RPS14B	0.198256	7.25685e-06	5.58855e-05	FALSE	0.0162564	2.09803	0.216905
YJL192C	SOP4	-0.0836599	0.203879	0.38105	FALSE	-0.0366555	1.11453	0.601048
YJL193W	YJL193W	0.165566	0.0953607	0.22615	FALSE	-0.00176333	0.903319	0.696739
YJL194W	CDC6	0.0835806	0.576915	0.747443	FALSE
YJL196C	ELO1	0.143394	0.00318914	0.0145112	FALSE
YJL197W	UBP12	0.0815812	0.653674	0.802196	FALSE
YJL199C	MBB1	-0.29236	0.0501302	0.136618	FALSE	-0.0182149	1.38344	0.476635
YJL200C	ACO2	0.0556249	0.604951	0.76793	FALSE	-0.0166696	1.06208	0.62464
YJL201W	ECM25	0.121381	0.558369	0.734307	FALSE	0.0709416	0.868242	0.711238
YJL202C	YJL202C	0.10356	0.501005	0.683206	FALSE
YJL203W	PRP21	0.0781757	0.609188	0.770304	FALSE	0.0965212	2.04268	0.229972
YJL208C	NUC1	0.0684942	0.705302	0.837241	FALSE	-0.0689449	1.59498	0.38492
YJL209W	CBP1	-0.442614	0.0438885	0.123849	FALSE	-0.0780469	2.15824	0.201523
YJL210W	PEX2	-0.5063	9.29539e-07	8.04029e-06	FALSE	-0.24278	12.4321	0
YJL212C	OPT1	0.494718	3.64403e-10	4.34976e-09	FALSE	0.296002	47.498	0
YJL213W	YJL213W	0.974938	1.80651e-12	2.59804e-11	FALSE	0.668694	42.009	0
YJL217W	REE1	4.27667	2.1639e-05	0.000154054	FALSE
YJR006W	POL31	-0.153193	0.157975	0.321242	FALSE
YJR007W	SUI2	-0.0763806	0.217385	0.39778	FALSE	0.11305	11.5796	0
YJR010C-A	SPC1	0.21796	0.0512039	0.139062	FALSE	-0.00738435	2.89902	0.0727679
YJR010W	MET3	-0.0530358	0.245307	0.430083	FALSE	0.0124282	2.07513	0.221459
YJR011C	YJR011C	-0.412506	0.0639686	0.165275	FALSE	0.139384	4.00844	0.0157485
YJR012C	YJR012C	0.172547	0.130339	0.28185	FALSE	-0.0960306	2.36347	0.154849
YJR013W	GPI14	0.369928	0.0071341	0.0288018	FALSE
YJR014W	TMA22	-0.18683	0.218947	0.399501	FALSE
YJR016C	ILV3	0.206042	9.31938e-05	0.00060131	FALSE
YJR017C	ESS1	0.119666	0.0435664	0.123037	FALSE
YJR021C	REC107	0.0144515	0.928239	0.961884	FALSE	-0.0503783	0.649665	0.809392
YJR024C	MDE1	-0.074451	0.317119	0.508555	FALSE	-0.192408	10.1748	0.000609756
YJR025C	BNA1	-0.327013	0.00117916	0.00598097	FALSE
YJR031C	GEA1	-0.0769659	0.691999	0.827836	FALSE	0.0289577	0.254338	0.96997
YJR040W	GEF1	-0.211256	0.150694	0.31085	FALSE	-0.0389049	1.58971	0.387024
YJR041C	URB2	-0.799591	1.17843e-05	8.84686e-05	FALSE	0.00842917	1.50045	0.421958
YJR042W	NUP85	0.26579	0.0223335	0.0738733	FALSE	0.0576313	1.46455	0.436902
YJR043C	POL32	0.043348	0.803225	0.896617	FALSE	0.0214874	0.771984	0.753221
YJR044C	VPS55	0.0339278	0.484656	0.669322	FALSE
YJR045C	SSC1	0.1943	1.47175e-07	1.41296e-06	FALSE	0.023371	0.645756	0.811453
YJR046W	TAH11	-0.118797	0.540648	0.719725	FALSE	0.00749008	0.808402	0.736671
YJR049C	UTR1	-0.057559	0.726349	0.848908	FALSE	0.0503471	9.42666	0.000609756
YJR050W	ISY1	0.0847485	0.618143	0.777021	FALSE	0.0771876	1.85432	0.289003
YJR057W	CDC8	0.430474	9.66934e-07	8.30358e-06	FALSE	0.155192	5.75609	0.00164935
YJR058C	APS2	0.442083	2.54517e-05	0.000179062	FALSE	0.038367	2.03428	0.232442
YJR060W	CBF1	0.0886537	0.541288	0.72031	FALSE	0.0872657	1.13448	0.590583
YJR061W	YJR061W	0.188131	0.130832	0.282574	FALSE	-0.269822	2.32885	0.160341
YJR062C	NTA1	0.166639	0.220499	0.400817	FALSE	0.293515	4.03371	0.0154882
YJR064W	CCT5	0.290274	4.49732e-05	0.000306177	FALSE	0.0983039	7.05532	0.000821355
YJR067C	YAE1	0.24727	0.096581	0.227727	FALSE
YJR068W	RFC2	0.00977849	0.934847	0.964474	FALSE	-0.0217542	1.47114	0.433841
YJR069C	HAM1	0.00599158	0.940152	0.968055	FALSE	0.0384508	5.15265	0.00301205
YJR072C	NPA3	0.234618	0.331937	0.524367	FALSE
YJR073C	OPI3	-0.252873	4.87286e-19	9.97127e-18	FALSE	0.0516634	10.2907	0.000609756
YJR074W	MOG1	-0.0458113	0.762827	0.866926	FALSE	-0.0220596	0.874508	0.708866
YJR075W	HOC1	0.170089	0.0271808	0.0863661	FALSE	0.00761874	0.589821	0.837839
YJR076C	CDC11	-0.0600178	0.6453	0.796559	FALSE	0.0142857	1.26997	0.53225
YJR077C	MIR1	0.0426191	0.434352	0.626173	FALSE	0.0623493	3.34544	0.0383871
YJR080C	AIM24	-0.210141	0.0742825	0.185499	FALSE	-0.0126638	1.24732	0.544403
YJR083C	ACF4	-0.131891	0.467015	0.654041	FALSE	-0.0940141	1.43238	0.452
YJR084W	YJR084W	-0.184995	0.288378	0.477759	FALSE	-0.0429762	1.69872	0.343248
YJR087W	YJR087W	0.259792	0.02828	0.0889901	FALSE
YJR088C	EMC2	0.278428	0.0164783	0.0579087	FALSE	-0.0821669	2.24029	0.180241
YJR091C	JSN1	-0.00733401	0.964764	0.982041	FALSE	-0.0096238	0.940682	0.680346
YJR092W	BUD4	0.131735	0.406135	0.598035	FALSE	-0.0307556	0.244721	0.973343
YJR096W	YJR096W	0.345503	0.0360258	0.10715	FALSE	0.244669	9.55825	0.000609756
YJR097W	JJJ3	0.132816	0.539979	0.719102	FALSE	0.0930533	1.18575	0.569384
YJR099W	YUH1	-0.169367	0.150785	0.310859	FALSE	-0.192122	5.23351	0.00301205
YJR100C	AIM25	-0.473585	0.00119998	0.00607442	FALSE	-0.0656256	1.35638	0.488908
YJR101W	RSM26	0.203035	0.0422028	0.120656	FALSE	0.00406858	1.29102	0.522216
YJR102C	VPS25	0.16261	0.262467	0.449712	FALSE	-0.444659	43.3019	0
YJR103W	URA8	-0.0319405	0.0332336	0.100515	FALSE
YJR104C	SOD1	-0.0275287	0.0682131	0.173488	FALSE	-0.016884	4.20773	0.0116964
YJR107W	LIH1	-0.0757357	0.53071	0.709131	FALSE	-0.114808	1.63054	0.371785
YJR109C	CPA2	0.0418034	0.746521	0.859352	FALSE	0.0663246	1.58089	0.389422
YJR111C	PXP2	-0.608034	0.00351858	0.0159091	FALSE	-0.439068	16.2822	0
YJR112W	NNF1	-0.402968	0.00459723	0.020052	FALSE	-0.148421	4.42578	0.00730737
YJR112W-A	YJR112W-A	-0.326055	7.10521e-06	5.48357e-05	FALSE	0.0505911	0.925624	0.686788
YJR113C	RSM7	-0.322516	0.000102084	0.000647014	FALSE	-0.130471	6.61138	0.000821355
YJR116W	TDA4	0.122397	0.427234	0.619152	FALSE
YJR117W	STE24	-0.0951259	0.30326	0.4952	FALSE	0.0435926	4.74544	0.00459459
YJR118C	ILM1	-0.0913177	0.152573	0.313642	FALSE	0.0814765	18.6037	0
YJR120W	YJR120W	0.608624	1.27587e-05	9.51856e-05	FALSE
YJR121W	ATP2	-0.151401	2.1196e-06	1.74892e-05	FALSE
YJR122W	IBA57	-0.142676	0.347458	0.540314	FALSE
YJR123W	RPS5	0.336462	1.04715e-149	2.34365e-147	TRUE	-0.0112159	2.66555	0.103208
YJR124C	YJR124C	-0.20223	0.135617	0.288215	FALSE	-0.0662665	1.01947	0.643537
YJR125C	ENT3	0.17771	0.296372	0.486392	FALSE	0.0273737	1.03749	0.635735
YJR126C	VPS70	-0.267143	0.033671	0.101495	FALSE	0.0340232	1.38301	0.476782
YJR127C	RSF2	-0.378449	0.068551	0.173838	FALSE	-0.117804	2.23269	0.182603
YJR129C	EFM3	0.17185	0.473834	0.659638	FALSE	-0.00121153	0.993852	0.657633
YJR130C	STR2	-0.203701	0.345641	0.538527	FALSE	-0.0948927	1.84202	0.292419
YJR131W	MNS1	0.249562	0.237338	0.42033	FALSE	0.013089	1.65644	0.360976
YJR133W	XPT1	-0.265861	1.77412e-06	1.48091e-05	FALSE	-0.160561	14.5873	0
YJR134C	SGM1	-0.539063	4.45272e-14	6.96296e-13	FALSE	0.0404325	1.18576	0.569379
YJR135W-A	TIM8	-0.0123637	0.786896	0.886115	FALSE	-0.141959	5.65702	0.00201681
YJR136C	TTI2	-0.688621	5.09989e-07	4.57712e-06	FALSE	0.108415	6.26338	0.000821355
YJR137C	MET5	0.243255	0.00110339	0.00566893	FALSE	0.0327902	1.43814	0.45005
YJR139C	HOM6	-0.1196	1.44371e-05	0.000106817	FALSE	-0.0262528	3.40605	0.0344602
YJR142W	YJR142W	0.216662	0.177929	0.346945	FALSE	-0.132979	2.28647	0.170328
YJR143C	PMT4	-0.102784	0.238302	0.421412	FALSE	0.00882511	1.75182	0.319139
YJR144W	MGM101	-0.213521	0.00986967	0.0374796	FALSE	-0.0195474	0.317503	0.950096
YJR145C	RPS4A	-0.0429225	0.001836	0.00889675	FALSE	0.0017267	1.31268	0.511949
YJR148W	BAT2	-0.500977	0.00108112	0.00556759	FALSE	0.160201	5.47698	0.00253165
YJR152W	DAL5	1.5056	1.74643e-43	8.68605e-42	FALSE	1.06132	60.098	0
YKL002W	DID4	0.615034	2.01332e-05	0.000145357	FALSE	0.139608	8.53641	0.000609756
YKL005C	BYE1	-0.269988	0.134513	0.286381	FALSE	-0.0556607	0.830301	0.727875
YKL006C-A	SFT1	0.176944	0.000798612	0.00424938	FALSE	0.0638803	2.19464	0.192153
YKL006W	RPL14A	0.489587	6.7885e-100	7.36656e-98	TRUE	0.00979524	2.05818	0.2247
YKL007W	CAP1	0.112031	0.0229681	0.0753883	FALSE	-0.0140396	0.906431	0.695696
YKL011C	CCE1	-0.492476	0.0100633	0.0380534	FALSE	0.0324387	1.51001	0.417951
YKL013C	ARC19	0.0755157	0.697718	0.832288	FALSE	-0.0138257	1.46859	0.435069
YKL014C	URB1	0.129673	0.481591	0.666422	FALSE	0.00754654	0.675617	0.79748
YKL016C	ATP7	0.158186	0.0292594	0.0913496	FALSE
YKL017C	HCS1	0.033476	0.815034	0.902831	FALSE	-0.0244893	0.428138	0.908061
YKL018C-A	YKL018C-A	0.187654	0.0251113	0.0815074	FALSE
YKL018W	SWD2	-0.243639	0.164809	0.330818	FALSE	-0.0807826	1.77298	0.312924
YKL019W	RAM2	0.331979	0.000170292	0.00104421	FALSE
YKL020C	SPT23	-0.0817367	0.609934	0.770975	FALSE
YKL021C	MAK11	0.017386	0.925701	0.961687	FALSE	0.0115084	1.35751	0.488377
YKL023W	YKL023W	-0.028829	0.833949	0.910756	FALSE	-0.00782121	2.00044	0.242592
YKL024C	URA6	0.404265	3.72431e-08	3.74628e-07	FALSE	-0.0413944	3.98734	0.0165724
YKL025C	PAN3	-0.0512933	0.820867	0.903079	FALSE	-0.217624	3.41768	0.0340904
YKL026C	GPX1	0.38199	0.0478277	0.13195	FALSE	0.268641	6.09279	0.00141343
YKL027W	TCD2	-0.193964	0.329311	0.522028	FALSE	-0.00734994	0.650247	0.809122
YKL028W	TFA1	0.33986	0.0118201	0.0434578	FALSE
YKL029C	MAE1	-0.389801	0.00657498	0.0270322	FALSE
YKL030W	YKL030W	-0.486974	0.00101231	0.00524614	FALSE
YKL033W-A	YKL033W-A	0.494003	1.52833e-06	1.28473e-05	FALSE	-0.0114534	2.38632	0.151112
YKL035W	UGP1	-0.135246	0.0112796	0.0418623	FALSE	-0.0236611	0.538947	0.860561
YKL037W	AIM26	0.0669733	0.743921	0.858291	FALSE
YKL038W	RGT1	0.0755289	0.694603	0.830231	FALSE	-0.0197137	2.21696	0.186632
YKL040C	NFU1	-0.253625	0.00155194	0.00765494	FALSE	-0.110237	2.57566	0.116814
YKL041W	VPS24	-0.167794	0.0114042	0.0421885	FALSE	-0.054314	2.82433	0.0792933
YKL043W	PHD1	0.0677317	0.74139	0.858118	FALSE
YKL045W	PRI2	0.0340052	0.801211	0.895502	FALSE
YKL046C	DCW1	-0.204655	0.0378809	0.111099	FALSE	-0.121236	4.06599	0.0148334
YKL047W	ANR2	0.0834199	0.664234	0.807956	FALSE	0.0628306	3.20257	0.0457595
YKL051W	SFK1	-0.00697259	0.960856	0.978897	FALSE	-0.0224228	0.622111	0.820821
YKL053C-A	MDM35	1.80049	3.58134e-13	5.36601e-12	FALSE	0.0455672	2.08894	0.218012
YKL054C	DEF1	0.0341781	0.853961	0.923271	FALSE	0.0853978	7.51646	0.000609756
YKL056C	TMA19	0.25326	1.95622e-25	5.34751e-24	FALSE	-0.011884	2.30243	0.166264
YKL060C	FBA1	0.343406	1.7533e-158	4.82967e-156	TRUE	0.0292892	12.5518	0
YKL061W	BLI1	0.41239	0.000901825	0.00474219	FALSE	-0.101873	3.79685	0.019979
YKL063C	YKL063C	0.154905	0.0441332	0.124246	FALSE	0.0615438	2.41435	0.146432
YKL064W	MNR2	0.0250739	0.865473	0.929132	FALSE	-0.0144068	1.08103	0.614611
YKL065C	YET1	-0.0480864	0.507761	0.689351	FALSE	0.00446731	0.261782	0.967418
YKL065W-A	YKL065W-A	0.0681358	0.755147	0.862303	FALSE	-0.0499748	1.37044	0.482893
YKL068W	NUP100	0.274555	0.113382	0.255842	FALSE	0.0155315	3.68379	0.0231242
YKL069W	YKL069W	0.153374	0.281878	0.470366	FALSE
YKL073W	LHS1	-0.0665761	0.621549	0.779377	FALSE	0.0949527	1.84089	0.292723
YKL075C	YKL075C	-0.205359	0.171668	0.3398	FALSE	0.188386	1.16669	0.577414
YKL076C	PSY1	-0.205359	0.171668	0.3398	FALSE	0.0409731	0.531924	0.864236
YKL077W	YKL077W	-0.0475614	0.524972	0.704796	FALSE	-0.0480479	1.72429	0.331101
YKL081W	TEF4	0.381068	2.7858e-22	6.60659e-21	FALSE	0.00665349	2.49889	0.130845
YKL082C	RRP14	-0.0467722	0.817832	0.902831	FALSE	-0.0129792	2.06819	0.222782
YKL083W	YKL083W	0.188166	0.446633	0.6367	FALSE
YKL085W	MDH1	0.0120867	0.854324	0.923271	FALSE	0.0417076	2.57802	0.116464
YKL086W	SRX1	0.145899	0.444497	0.634667	FALSE	-0.133824	3.02363	0.0581334
YKL088W	CAB3	-0.159044	0.434187	0.626173	FALSE	-0.0357273	4.51136	0.00681818
YKL090W	CUE2	0.286176	0.0867354	0.209017	FALSE	0.143339	2.30019	0.166822
[truncated: 1,582 more rows]

## Sheet: S3 (Cross C)
transcript	gene name	estimate (ASE)	p-value (ASE)	adjust p-value (ASE)	has cell-cycle interaction (ASE)	estimate (one-pot)	LOD (one-pot)	FDR (one-pot)
YAL001C	TFC3	-0.292671	0.00144448	0.00589328	FALSE	-0.324937	2.65863	0.154865
YAL002W	VPS8	-0.166924	0.160977	0.293129	FALSE	0.065611	0.916466	0.73081
YAL005C	SSA1	-0.188174	6.352e-09	5.97279e-08	FALSE	-0.238828	6.28951	0.00120482
YAL007C	ERP2	0.0816129	0.013829	0.0415635	FALSE	0.0460876	1.23638	0.596901
YAL008W	FUN14	0.539834	2.83089e-06	2.01677e-05	FALSE	0.320033	2.95286	0.107038
YAL009W	SPO7	-0.411636	3.68656e-05	0.000213786	FALSE	0.0431045	2.37313	0.221378
YAL010C	MDM10	-0.0279581	0.862263	0.923286	FALSE
YAL011W	SWC3	0.0324801	0.714311	0.82102	FALSE
YAL012W	CYS3	0.0486302	0.0951967	0.195122	FALSE
YAL013W	DEP1	-0.0550967	0.377624	0.542116	FALSE	0.0449951	1.1434	0.636705
YAL014C	SYN8	0.291048	0.00135714	0.00559094	FALSE	0.21193	1.90344	0.345712
YAL015C	NTG1	-0.144082	0.0282202	0.0746317	FALSE
YAL016C-B	YAL016C-B	0.231098	0.0338396	0.0859415	FALSE
YAL016W	TPD3	-0.203258	2.57315e-05	0.000152405	FALSE	-0.0301072	1.34676	0.549731
YAL017W	PSK1	0.171861	0.0640814	0.143286	FALSE	0.314363	4.10346	0.0193282
YAL019W	FUN30	0.218668	0.0543874	0.125954	FALSE	-0.0754464	1.00957	0.69056
YAL020C	ATS1	0.145547	0.0240764	0.0653689	FALSE	0.599805	6.01033	0.00120482
YAL021C	CCR4	0.143405	0.115934	0.22727	FALSE	0.0562763	2.81213	0.127002
YAL022C	FUN26	0.102524	0.251201	0.404075	FALSE	-0.0957096	0.792758	0.779648
YAL023C	PMT2	0.197069	0.0841605	0.17703	FALSE	-0.00551199	0.56901	0.872551
YAL024C	LTE1	-0.152576	0.24949	0.402551	FALSE
YAL025C	MAK16	0.139719	0.000493964	0.00224419	FALSE	-0.0351275	0.72199	0.812455
YAL026C	DRS2	0.122576	0.317272	0.477438	FALSE
YAL026C-A	YAL026C-A	0.0977619	0.269031	0.424415	FALSE	-0.130058	0.214562	0.980116
YAL027W	SAW1	0.0923347	0.278314	0.435135	FALSE	-0.0986827	1.62765	0.442117
YAL028W	FRT2	0.403812	0.00247871	0.00953484	FALSE	-0.460171	3.80815	0.0288678
YAL029C	MYO4	0.237458	9.96106e-05	0.000534217	FALSE	0.0904207	2.72658	0.143396
YAL030W	SNC1	-0.0473363	0.261002	0.415688	FALSE	-0.123407	2.2937	0.240092
YAL031C	GIP4	-0.0658662	0.677746	0.795765	FALSE	0.399279	1.83111	0.372379
YAL031W-A	YAL031W-A	0.00301081	0.986092	0.993254	FALSE
YAL032C	PRP45	0.160534	0.0168718	0.0487208	FALSE
YAL033W	POP5	0.179301	4.69693e-05	0.000265893	FALSE
YAL034C	FUN19	-0.124107	0.158727	0.289454	FALSE	-0.167822	3.463	0.0492675
YAL034C-B	YAL034C-B	-0.0551795	0.274459	0.430941	FALSE
YAL034W-A	MTW1	-0.0824763	0.293805	0.453404	FALSE	0.119745	4.88473	0.00379147
YAL035W	FUN12	-0.197998	5.41012e-13	7.18424e-12	FALSE
YAL036C	RBG1	-0.0819694	0.0145036	0.0431307	FALSE
YAL037C-A	YAL037C-A	0.329026	0.143994	0.26797	FALSE
YAL037C-B	YAL037C-B	0.165227	0.0451715	0.107863	FALSE
YAL037W	YAL037W	-0.28369	0.019574	0.055092	FALSE
YAL038W	CDC19	0.165227	0.0451715	0.107863	FALSE
YAL039C	CYC3	-0.0455901	0.227332	0.376598	FALSE
YAL040C	CLN3	0.0609535	0.113421	0.223838	FALSE
YAL041W	CDC24	0.274814	0.000565299	0.00254054	FALSE
YAL042W	ERV46	0.0624637	0.13421	0.254794	FALSE
YAL043C	PTA1	-0.167503	0.0992713	0.201407	FALSE
YAL044C	GCV3	0.0280794	0.0606921	0.13719	FALSE
YAL044W-A	BOL1	0.208616	0.000118051	0.000625058	FALSE
YAL045C	YAL045C	0.208616	0.000118051	0.000625058	FALSE
YAL046C	BOL3	0.102988	0.000933176	0.00397216	FALSE	0.217119	5.35781	0.00155039
YAL047C	SPC72	-0.214964	0.0812101	0.171984	FALSE	0.226311	0.525946	0.88692
YAL047W-A	YAL047W-A	0.0670905	0.708861	0.819102	FALSE
YAL049C	AIM2	0.762408	2.82775e-11	3.25322e-10	FALSE	0.681344	33.7527	0
YAL051W	OAF1	-0.0234986	0.86006	0.922286	FALSE	0.0640589	0.414273	0.933123
YAL053W	FLC2	-0.318876	1.0552e-06	8.08072e-06	FALSE	-0.272443	1.68383	0.421579
YAL054C	ACS1	0.617411	1.10685e-35	3.63585e-34	FALSE	0.908917	39.4703	0
YAL055W	PEX22	0.512275	3.22858e-09	3.10603e-08	FALSE	0.123578	0.91037	0.732052
YAL056C-A	YAL056C-A	0.248324	0.0133209	0.0404323	FALSE
YAL056W	GPB2	0.146674	0.162417	0.295427	FALSE	0.206719	1.45782	0.512675
YAL058W	CNE1	0.25702	0.0100819	0.0318801	FALSE	0.0511385	1.72415	0.408638
YAL059W	ECM1	-0.0705741	0.231663	0.381118	FALSE	0.131898	1.31089	0.565781
YAL060W	BDH1	0.561021	1.196e-73	7.46454e-72	FALSE	0.497562	24.5702	0
YAL061W	BDH2	-0.00736227	0.952361	0.973159	FALSE	0.125492	0.550495	0.877554
YAL062W	GDH3	-1.26079	3.45642e-49	1.48775e-47	FALSE	-1.25868	15.0781	0
YAL063C	FLO9	-0.482211	0.00055413	0.00249259	FALSE
YAL067C	SEO1	-5.26009	1.17502e-13	1.62517e-12	FALSE
YAL068C	PAU8	0.693147	0.00794137	0.0260179	FALSE
YAR002C-A	ERP1	0.162308	0.0053433	0.0185917	FALSE	0.291866	4.0829	0.0201521
YAR002W	NUP60	-0.385326	1.39732e-07	1.16669e-06	FALSE	-0.243367	1.53924	0.47848
YAR003W	SWD1	-0.0628925	0.363287	0.526988	FALSE	-0.25703	2.71389	0.14537
YAR007C	RFA1	-0.081213	0.177773	0.315207	FALSE	0.262149	1.66671	0.426366
YAR008W	SEN34	0.213974	0.00124693	0.00516674	FALSE	0.228687	0.632562	0.847786
YAR014C	BUD14	0.126946	0.0465026	0.110618	FALSE	0.381346	4.49443	0.00819672
YAR015W	ADE1	0.158616	0.0142609	0.0425103	FALSE
YAR019C	CDC15	0.79723	1.78422e-06	1.32964e-05	FALSE	0.20863	1.41473	0.527029
YAR023C	YAR023C	0.808458	6.46013e-06	4.30072e-05	FALSE
YAR027W	UIP3	0.592825	4.12893e-10	4.35851e-09	FALSE
YAR031W	PRM9	-1.02585	0.000124807	0.000656653	FALSE
YAR033W	MST28	-0.513042	0.010999	0.0342168	FALSE
YAR035W	YAT1	0.499024	4.47327e-05	0.000255258	FALSE
YAR042W	SWH1	0.145708	0.138612	0.260283	FALSE
YBL001C	ECM15	0.00326407	0.908567	0.950445	FALSE	0.128109	4.90149	0.00379147
YBL002W	HTB2	0.161498	1.51147e-27	3.97198e-26	FALSE	0.169609	3.65912	0.036284
YBL003C	HTA2	0.434466	2.97565e-234	6.75338e-232	TRUE
YBL004W	UTP20	-0.098735	0.0398425	0.0978042	FALSE
YBL005W	PDR3	-0.43423	0.0428165	0.103677	FALSE
YBL006C	LDB7	0.383911	1.07814e-18	1.98641e-17	FALSE
YBL006W-A	YBL006W-A	0.31691	5.06145e-06	3.44303e-05	FALSE
YBL007C	SLA1	-0.191624	0.000197516	0.000985213	FALSE	0.184833	3.1965	0.0736174
YBL009W	ALK2	-0.0611059	0.543626	0.691548	FALSE	0.0570888	0.592367	0.863691
YBL010C	YBL010C	-0.105902	0.610099	0.746441	FALSE
YBL011W	SCT1	-0.0467278	0.496791	0.650702	FALSE	-0.277388	4.2575	0.0157046
YBL014C	RRN6	0.41187	1.43786e-05	9.03052e-05	FALSE	0.60493	4.75735	0.00409091
YBL015W	ACH1	-0.528324	2.28353e-27	5.93838e-26	FALSE	-0.98583	23.3267	0
YBL017C	PEP1	0.133009	0.301881	0.46151	FALSE	0.119009	0.612082	0.855449
YBL018C	POP8	0.241038	1.37221e-12	1.77041e-11	FALSE	0.141276	2.62626	0.160802
YBL019W	APN2	0.0106656	0.804185	0.885017	FALSE	-1.01591	11.9341	0
YBL020W	RFT1	-0.127374	0.269595	0.424767	FALSE	-0.154881	1.13743	0.63893
YBL021C	HAP3	-0.242539	4.93689e-05	0.000277902	FALSE	-0.201514	1.70991	0.411533
YBL022C	PIM1	0.024116	0.888895	0.940109	FALSE	-0.0384428	0.564278	0.873877
YBL023C	MCM2	0.0831127	0.316307	0.47656	FALSE	0.146604	0.846648	0.757605
YBL024W	NCL1	-0.167549	0.00895155	0.0288542	FALSE	0.00707815	0.802752	0.775038
YBL025W	RRN10	0.693147	2.28349e-05	0.000137202	FALSE
YBL026W	LSM2	-0.980742	5.93319e-12	7.27873e-11	FALSE	0.099043	2.55997	0.173755
YBL027W	RPL19B	-0.235899	2.40404e-05	0.00014341	FALSE	0.0204637	0.909404	0.732231
YBL028C	YBL028C	-0.0499259	0.189747	0.331346	FALSE	0.107489	2.20477	0.262479
YBL029C-A	YBL029C-A	0.0339602	0.793367	0.876002	FALSE	0.267402	5.86338	0.00120482
YBL029W	YBL029W	0.275707	0.0675827	0.149707	FALSE	0.357071	1.83825	0.36985
YBL030C	PET9	-0.0906586	0.000222119	0.00109589	FALSE	-0.00117342	0.252979	0.972377
YBL032W	HEK2	0.00573956	0.90049	0.947354	FALSE
YBL033C	RIB1	-0.126021	0.477408	0.633962	FALSE	-0.00453041	0.820243	0.76851
YBL034C	STU1	0.0578145	0.609101	0.746347	FALSE	-0.0939268	0.390452	0.939534
YBL035C	POL12	0.013292	0.882369	0.936181	FALSE	-0.103427	0.884148	0.741724
YBL036C	YBL036C	-0.199692	1.03469e-05	6.70067e-05	FALSE	0.0308372	1.60923	0.449962
YBL037W	APL3	-0.131019	0.277047	0.433635	FALSE	0.0735245	0.308226	0.961002
YBL038W	MRPL16	0.0619611	0.149302	0.275282	FALSE	-0.0315698	0.967814	0.706888
YBL039C	URA7	0.052948	0.183917	0.324029	FALSE	0.111893	2.23031	0.25474
YBL039W-B	YBL039W-B	-0.12534	0.0676967	0.149893	FALSE	-0.120267	2.84029	0.12224
YBL040C	ERD2	0.000712173	0.977742	0.988432	FALSE	0.11891	4.15598	0.0184414
YBL041W	PRE7	0.0867753	0.00122305	0.00508467	FALSE
YBL042C	FUI1	0.11871	0.397201	0.561025	FALSE
YBL043W	ECM13	0.499708	0.00351511	0.0129805	FALSE	0.473711	1.39534	0.532211
YBL045C	COR1	0.110318	2.6974e-06	1.93507e-05	FALSE	0.152217	3.74502	0.0328173
YBL046W	PSY4	0.0355344	0.752057	0.847967	FALSE	0.181448	1.18929	0.620587
YBL047C	EDE1	0.00278978	0.94775	0.970292	FALSE	-0.00454736	1.36525	0.542519
YBL049W	MOH1	-0.28928	0.0755957	0.162484	FALSE
YBL050W	SEC17	-0.00813906	0.858111	0.921304	FALSE	0.0125245	0.679813	0.830191
YBL051C	PIN4	0.252214	0.0202059	0.056362	FALSE	0.345823	1.72856	0.407636
YBL052C	SAS3	0.00729976	0.952597	0.973159	FALSE
YBL053W	YBL053W	0.00741961	0.958374	0.976364	FALSE
YBL054W	TOD6	-0.0413301	0.712758	0.82019	FALSE	0.325007	1.99739	0.31457
YBL055C	YBL055C	0.0657053	0.55911	0.704141	FALSE	0.261216	1.21456	0.605335
YBL056W	PTC3	-0.102994	0.022051	0.0607285	FALSE	0.0329395	1.57977	0.463902
YBL058W	SHP1	0.0383672	0.312787	0.473113	FALSE	-0.147807	2.67209	0.15192
YBL059C-A	CMC2	0.126892	3.7703e-05	0.000217631	FALSE	0.135555	2.61391	0.163649
YBL059W	YBL059W	-0.482315	0.000185652	0.00092998	FALSE	0.182292	1.78981	0.389328
YBL060W	YEL1	0.147731	0.000211953	0.00105092	FALSE	-0.0180447	0.617205	0.853956
YBL061C	SKT5	0.0917119	0.196531	0.339779	FALSE	0.160153	2.20691	0.261895
YBL062W	YBL062W	0.133165	0.0745832	0.16107	FALSE
YBL063W	KIP1	-0.0392989	0.680376	0.798008	FALSE	-0.0839405	0.303427	0.961698
YBL064C	PRX1	-0.0396941	0.228522	0.377943	FALSE	-0.0170081	2.2779	0.242967
YBL065W	YBL065W	-0.0640522	0.068904	0.15196	FALSE
YBL066C	SEF1	0.112827	0.444743	0.605398	FALSE
YBL067C	UBP13	-0.0539721	0.459492	0.618803	FALSE	0.0327636	0.918884	0.730317
YBL068W	PRS4	-0.0977602	0.0756415	0.162512	FALSE	-0.0424554	0.831124	0.763879
YBL068W-A	YBL068W-A	0.101001	0.230393	0.379655	FALSE
YBL069W	AST1	0.101001	0.230393	0.379655	FALSE
YBL071C	YBL071C	-0.0575065	0.196868	0.340079	FALSE
YBL071W-A	KTI11	-0.0575065	0.196868	0.340079	FALSE	-0.0529722	1.96775	0.323891
YBL075C	SSA3	0.184011	0.207779	0.352512	FALSE
YBL076C	ILS1	-0.22308	0.0169448	0.0488484	FALSE	-0.125781	1.98899	0.316861
YBL077W	YBL077W	-0.198451	0.346239	0.509061	FALSE
YBL078C	ATG8	0.0225671	0.872704	0.930077	FALSE	-0.105883	1.57374	0.466022
YBL079W	NUP170	-0.399915	5.02967e-06	3.42608e-05	FALSE	-0.41328	3.63863	0.037408
YBL081W	YBL081W	-0.0780225	0.356765	0.520096	FALSE	0.160878	1.06199	0.667395
YBL082C	ALG3	0.0348282	0.609724	0.746347	FALSE
YBL083C	YBL083C	0.0345703	0.61276	0.748022	FALSE
YBL085W	BOI1	-0.0189828	0.905905	0.949252	FALSE	-0.123073	1.28743	0.577187
YBL086C	YBL086C	0.0115382	0.934805	0.964616	FALSE
YBL088C	TEL1	-0.0786127	0.405335	0.568265	FALSE	0.18688	0.529997	0.885007
YBL089W	AVT5	0.0178127	0.816404	0.893927	FALSE	0.0936354	0.533395	0.883804
YBL090W	MRP21	0.29267	0.117336	0.229388	FALSE	0.197224	4.41826	0.0106931
YBL091C	MAP2	0.187116	0.00171171	0.00688128	FALSE	0.0796676	0.390331	0.939582
YBL091C-A	SCS22	-0.0222522	0.715865	0.821682	FALSE	0.0483548	1.77969	0.392192
YBL094C	YBL094C	0.0675962	0.235011	0.384599	FALSE
YBL095W	MRX3	0.0670645	0.212224	0.357743	FALSE	0.0445558	0.763359	0.793493
YBL096C	YBL096C	0.0667557	0.588173	0.729264	FALSE
YBL097W	BRN1	-0.0169559	0.904271	0.948958	FALSE
YBL098W	BNA4	-0.239263	0.0001189	0.000627556	FALSE	-0.046494	1.27785	0.579202
YBL099W	ATP1	-0.11752	8.18059e-05	0.000443012	FALSE	0.0533964	1.51092	0.490891
YBL101C	ECM21	-0.0412598	0.443348	0.604159	FALSE	-0.218093	0.96438	0.707978
YBL102W	SFT2	-0.0349583	0.486173	0.641758	FALSE	-0.0805481	1.03483	0.680283
YBL103C	RTG3	-0.158305	0.157382	0.287737	FALSE
YBL104C	SEA4	-0.00314755	0.981632	0.990375	FALSE	0.218307	0.589572	0.864262
YBL105C	PKC1	0.272782	0.138494	0.260159	FALSE	-0.211159	0.959128	0.709833
YBL106C	SRO77	-0.0971704	0.481897	0.63801	FALSE	-0.491221	2.18067	0.26889
YBL107C	MIX23	-0.273206	7.23638e-10	7.51169e-09	FALSE	-0.508866	7.08363	0.000787402
YBR001C	NTH2	0.000277171	0.999011	0.999812	FALSE	0.163605	0.869352	0.748044
YBR003W	COQ1	-0.188149	0.0375643	0.0932664	TRUE	0.080844	0.331002	0.955062
YBR005W	RCR1	-0.246135	0.00143205	0.00586086	FALSE	-0.20812	2.41969	0.208977
YBR006W	UGA2	-0.6351	4.05005e-23	9.10897e-22	FALSE	-0.968151	31.7869	0
YBR007C	DSF2	-0.233615	0.281981	0.439841	FALSE	-0.19589	2.33387	0.22844
YBR008C	FLR1	-0.000148328	0.998649	0.999812	FALSE	-0.370878	3.36096	0.0595261
YBR009C	HHF1	0.0159971	0.307597	0.467552	TRUE
YBR010W	HHT1	0.433069	1.98243e-149	2.74952e-147	TRUE
YBR011C	IPP1	-0.1153	2.5467e-23	5.77986e-22	FALSE
YBR012C	YBR012C	-0.735243	2.37809e-18	4.31774e-17	FALSE
YBR014C	GRX7	-0.250742	2.71433e-08	2.44633e-07	FALSE	-0.28875	4.42897	0.0103562
YBR015C	MNN2	0.180907	0.000200351	0.000997358	TRUE	-0.0611821	0.171461	0.989415
YBR016W	YBR016W	0.281721	6.66778e-15	9.99766e-14	TRUE	0.293202	5.08067	0.00296296
YBR017C	KAP104	-0.265458	4.42148e-07	3.5042e-06	FALSE	-0.414304	6.56381	0.000787402
YBR021W	FUR4	0.640169	1.62362e-13	2.19101e-12	FALSE	0.606508	5.34885	0.00155039
YBR022W	POA1	-0.340612	1.77213e-12	2.27461e-11	FALSE	-0.361529	7.50214	0.000787402
YBR023C	CHS3	0.108346	0.176563	0.313729	FALSE	-0.292265	4.08196	0.0202052
YBR024W	SCO2	0.0465018	0.689794	0.805205	FALSE	-0.150467	0.810905	0.772537
YBR025C	OLA1	-0.0987556	0.0130677	0.0397847	FALSE	-0.016944	1.95358	0.32814
YBR026C	ETR1	0.235277	0.00418946	0.015136	FALSE	0.357913	2.03268	0.306204
YBR028C	YPK3	0.303682	0.199661	0.342815	FALSE	0.30045	3.23338	0.0712609
YBR029C	CDS1	-0.0499373	0.135958	0.256844	FALSE	-0.0985637	1.68634	0.420977
YBR030W	RKM3	0.114996	0.18519	0.325689	FALSE	0.0268595	0.131985	0.993628
YBR031W	RPL4A	0.080793	6.10797e-14	8.6394e-13	FALSE	-0.0541797	3.64115	0.0373122
YBR033W	EDS1	-0.167701	0.163287	0.296901	FALSE
YBR034C	HMT1	0.121361	0.622674	0.756267	FALSE
YBR035C	PDX3	0.379154	3.40901e-41	1.24242e-39	FALSE	0.292278	11.5509	0
YBR036C	CSG2	-0.150565	0.496609	0.650635	FALSE	-0.0539287	0.355285	0.948374
YBR037C	SCO1	0.0648487	0.376718	0.541422	FALSE	0.143877	0.606765	0.858125
YBR038W	CHS2	0.200528	0.173355	0.309167	FALSE	0.134234	1.20498	0.610914
YBR039W	ATP3	0.354006	3.17777e-18	5.72801e-17	FALSE	0.326897	13.6592	0
YBR042C	CST26	-0.0696818	0.211773	0.357224	FALSE	0.0374928	1.24561	0.593433
YBR043C	QDR3	0.154314	0.0888315	0.184729	FALSE	-0.232351	1.81104	0.381958
YBR044C	TCM62	0.37956	1.09934e-05	7.08256e-05	FALSE	0.303398	2.97642	0.105337
YBR045C	GIP1	-0.194699	0.263571	0.418445	FALSE	-0.0807272	0.38072	0.940471
YBR046C	ZTA1	0.440491	4.50093e-05	0.00025625	FALSE	0.436032	3.14306	0.0822584
YBR048W	RPS11B	0.00803003	0.318502	0.478475	FALSE	0.0352225	2.02977	0.306707
YBR049C	REB1	-0.103824	0.532353	0.681199	FALSE	0.0680244	0.701994	0.82121
YBR053C	YBR053C	0.108698	0.0399705	0.0980702	FALSE
YBR054W	YRO2	-0.0995382	0.0197	0.0553841	FALSE	0.0344037	0.412465	0.933323
YBR055C	PRP6	0.689201	3.92352e-06	2.72085e-05	FALSE	0.3605	1.66487	0.427251
YBR056W	YBR056W	-0.000510436	0.994027	0.997515	FALSE
YBR056W-A	YBR056W-A	0.182369	0.000205832	0.00102261	FALSE	-0.0106633	1.41855	0.525535
YBR058C	UBP14	0.21672	0.0184086	0.0522535	FALSE	0.294828	2.64276	0.157952
YBR059C	AKL1	0.146037	0.101068	0.204305	FALSE	0.507043	7.23559	0.000787402
YBR061C	TRM7	-0.143118	0.0466129	0.110828	FALSE	-0.121554	0.38227	0.940344
YBR063C	YBR063C	0.0591688	0.704055	0.815625	FALSE	-0.030716	1.21329	0.605968
YBR065C	ECM2	-0.900936	0.000149782	0.000771515	FALSE
YBR066C	NRG2	-0.962908	3.90501e-07	3.09979e-06	FALSE	-0.985324	11.8367	0
YBR067C	TIP1	0.320355	0.0661849	0.14733	FALSE	-0.474938	2.02031	0.309087
YBR070C	ALG14	0.104509	0.111936	0.221961	FALSE	0.260248	1.30389	0.569306
YBR071W	YBR071W	-0.0132296	0.818118	0.895238	FALSE	0.129564	1.07278	0.66492
YBR072C-A	YBR072C-A	-0.0644643	0.675419	0.794581	FALSE
YBR072W	HSP26	-0.349892	0.0014447	0.00589328	FALSE	-0.478395	1.41917	0.525292
YBR073W	RDH54	-0.460751	0.00562122	0.0194233	FALSE	0.159739	0.647301	0.843777
YBR074W	PFF1	0.0808948	0.332388	0.494226	FALSE	0.378216	5.77437	0.00120482
YBR076C-A	YBR076C-A	0.301787	0.00386699	0.0141346	FALSE	0.403014	3.10806	0.0876068
YBR076W	ECM8	0.295821	0.00355099	0.0130753	FALSE
YBR077C	SLM4	-0.0862291	0.107357	0.214241	FALSE	-0.0835553	1.52673	0.485435
YBR078W	ECM33	-0.00379897	0.840655	0.90833	FALSE
YBR079C	RPG1	-0.0312471	0.69414	0.808266	FALSE	0.00553379	0.274299	0.969006
YBR080C	SEC18	0.0170701	0.767956	0.859109	FALSE	0.0523829	2.18479	0.268018
YBR081C	SPT7	-0.341791	0.00420572	0.0151791	FALSE	-0.220011	0.687701	0.827651
YBR082C	UBC4	-0.0766732	0.000131032	0.000681502	FALSE	0.00513072	1.43823	0.519578
YBR083W	TEC1	0.316501	0.00521177	0.0181594	FALSE
YBR084C-A	RPL19A	0.751174	6.30055e-17	1.04862e-15	FALSE	-0.0355332	1.86239	0.362173
YBR084W	MIS1	0.0432071	0.673381	0.79296	FALSE	-0.019714	0.418559	0.932649
YBR085C-A	YBR085C-A	-0.0234182	0.233805	0.383002	FALSE	0.037669	0.909647	0.732189
YBR085W	AAC3	0.538997	0.0234134	0.0637421	FALSE
YBR086C	IST2	-0.35491	3.56203e-07	2.84563e-06	FALSE	0.109638	1.24298	0.594532
YBR087W	RFC5	0.278713	0.265834	0.420879	FALSE	-0.0562963	0.40712	0.934218
YBR088C	POL30	0.266692	0.0406799	0.0996149	FALSE	0.0548988	0.249833	0.97304
YBR089C-A	NHP6B	-0.392686	3.88475e-102	3.7301e-100	TRUE	-0.951965	168.726	0
YBR089W	YBR089W	0.133225	0.570131	0.714757	FALSE
YBR090C	YBR090C	-0.318096	2.15059e-40	7.66991e-39	FALSE
YBR091C	TIM12	0.233789	0.00114238	0.00477576	FALSE	0.0205319	1.7409	0.405179
YBR092C	PHO3	-0.358861	4.54613e-16	7.11562e-15	FALSE	-0.561389	10.2017	0
YBR093C	PHO5	-0.33286	0.0239241	0.0649907	FALSE	0.0124346	0.646915	0.843867
YBR094W	PBY1	-0.316037	0.00298303	0.0112071	FALSE	-0.296831	2.26839	0.244997
YBR095C	RXT2	-0.042196	0.605663	0.74448	FALSE	0.0998258	1.65632	0.431021
YBR097W	VPS15	-0.036563	0.873677	0.930771	FALSE	-0.0968391	1.19056	0.619909
YBR098W	MMS4	0.193478	0.266879	0.421952	FALSE
YBR101C	FES1	0.0805579	0.373601	0.538353	FALSE	-0.295974	3.68056	0.0350453
YBR103C-A	YBR103C-A	0.282858	0.000180973	0.000912099	FALSE
YBR103W	SIF2	0.277096	0.000163757	0.000835175	FALSE	0.195933	1.10381	0.650176
YBR106W	PHO88	0.0150007	0.194857	0.337234	FALSE	-0.0261615	1.31221	0.565014
YBR107C	IML3	0.379537	6.74961e-05	0.000369527	FALSE
YBR108W	AIM3	-0.107462	0.259074	0.413541	FALSE	0.305199	1.57537	0.465451
YBR109C	CMD1	0.0278355	0.116452	0.228018	FALSE	-0.0715153	1.67725	0.423127
YBR110W	ALG1	-0.0739245	0.149965	0.276301	FALSE	-0.0804673	1.92882	0.338262
YBR111W-A	SUS1	0.0161959	0.722771	0.826691	FALSE	-0.11983	1.41553	0.526716
YBR112C	CYC8	0.0413367	0.507502	0.660745	FALSE	0.201426	1.3247	0.558575
YBR113W	YBR113W	-0.267617	0.00552459	0.019169	FALSE
YBR114W	RAD16	0.01442	0.837302	0.906472	FALSE	0.04983	0.355451	0.948314
YBR115C	LYS2	0.283746	1.03468e-11	1.24485e-10	FALSE	0.2974	6.44049	0.000787402
YBR116C	YBR116C	-0.303682	0.199661	0.342815	FALSE
YBR117C	TKL2	-0.324628	0.132796	0.25288	FALSE
YBR119W	MUD1	0.173618	0.0265838	0.0709801	FALSE	0.427044	3.60102	0.039726
YBR120C	CBP6	-0.123973	0.0268869	0.0716744	FALSE	0.0372878	1.07133	0.665377
YBR121C	GRS1	-0.0766952	0.0110564	0.0343313	FALSE	-0.083205	1.67086	0.424589
YBR122C	MRPL36	-0.07654	0.0105981	0.0331347	FALSE	-0.132535	2.88571	0.114281
YBR123C	TFC1	-0.0695815	0.429287	0.59129	FALSE	-0.304603	1.19564	0.616838
YBR126C	TPS1	-0.0356522	0.372697	0.53767	FALSE	0.0496566	0.385372	0.940091
YBR127C	VMA2	0.174364	1.79481e-12	2.29782e-11	FALSE	0.364566	20.9166	0
YBR128C	ATG14	0.037382	0.802547	0.883988	FALSE
YBR130C	SHE3	0.495815	0.0208361	0.0579903	FALSE	0.0182558	2.41643	0.209742
YBR131W	CCZ1	0.0855831	0.582757	0.72507	FALSE
YBR133C	HSL7	-0.0323639	0.845483	0.911574	FALSE	-0.516694	3.87513	0.0250337
YBR135W	CKS1	-0.0724169	0.137877	0.25939	FALSE	-0.127048	1.76547	0.397809
YBR136W	MEC1	-0.128211	0.500212	0.653128	FALSE	0.136312	0.991308	0.696693
YBR137W	YBR137W	0.0632987	0.151596	0.278524	FALSE	0.00995801	1.71438	0.410658
YBR138C	YBR138C	-0.0509481	0.644433	0.772467	FALSE	0.137512	1.02422	0.685711
YBR139W	YBR139W	0.0547008	0.19208	0.333916	FALSE
YBR140C	IRA1	-0.0186904	0.701974	0.813781	FALSE
YBR141C	BMT2	-0.252726	0.00450591	0.0161009	FALSE
YBR141W-A	YBR141W-A	0.15922	0.365355	0.529024	FALSE
YBR142W	MAK5	-0.107435	0.00919433	0.0295224	FALSE	-0.072687	2.74639	0.139514
YBR143C	SUP45	-0.0893921	0.313282	0.473662	FALSE	-0.00212467	1.61999	0.445388
YBR145W	ADH5	-0.33684	8.13313e-09	7.60463e-08	FALSE	-0.789431	14.6695	0
YBR146W	MRPS9	0.130097	0.000153646	0.000787633	FALSE	-0.162323	2.07953	0.293312
YBR147W	RTC2	0.200353	0.0165377	0.0479237	FALSE	0.188425	0.760652	0.794786
YBR148W	YSW1	-0.119168	0.432542	0.593972	FALSE
YBR149W	ARA1	-0.966427	9.04717e-99	8.06652e-97	FALSE
YBR150C	TBS1	-0.909057	5.32408e-93	4.50562e-91	FALSE
YBR151W	APD1	-0.449244	1.92133e-18	3.50116e-17	FALSE
YBR153W	RIB7	-0.0695746	0.330063	0.491942	FALSE	-0.136188	0.765896	0.792282
YBR154C	RPB5	-0.0347829	0.526391	0.675822	FALSE	-0.106744	4.54134	0.00753138
YBR155W	CNS1	-0.00703419	0.907899	0.950275	FALSE	-0.0224612	2.24886	0.249123
YBR156C	SLI15	-0.17185	0.473834	0.630952	FALSE	-0.287154	0.802577	0.775089
YBR158W	AMN1	0.0269205	0.805464	0.885949	FALSE	-0.144035	1.00405	0.692779
YBR159W	IFA38	-0.186473	0.116056	0.227421	FALSE	-0.135684	3.19354	0.0740065
YBR160W	CDC28	-0.111486	0.0866287	0.181357	FALSE	-0.136002	0.557933	0.875615
YBR161W	CSH1	0.146408	0.0252444	0.0678027	FALSE	0.0434933	1.03433	0.680579
YBR162C	TOS1	0.409749	3.22509e-77	2.09128e-75	TRUE
YBR162W-A	YSY6	0.14481	2.11512e-19	4.06185e-18	FALSE	0.276316	22.1826	0
YBR163W	EXO5	-0.260626	0.0305749	0.0792217	FALSE	-0.213269	0.91032	0.732062
YBR165W	UBS1	-0.143894	0.33432	0.495476	FALSE	0.0487131	0.664998	0.837949
YBR166C	TYR1	0.351248	0.000128893	0.000673887	FALSE	0.247401	3.22703	0.0716994
YBR168W	PEX32	0.0675297	0.490923	0.646067	FALSE	0.219693	1.26002	0.587003
YBR169C	SSE2	0.0140104	0.870243	0.927652	FALSE	-0.214484	1.63272	0.440176
YBR170C	NPL4	-0.211279	0.0175208	0.0501612	FALSE	-0.108692	0.640271	0.845415
YBR171W	SEC66	-0.136607	0.00508677	0.0177983	FALSE	-0.0665829	0.4776	0.908074
YBR172C	SMY2	-0.0919945	0.0380295	0.094234	FALSE
YBR173C	UMP1	0.00202498	0.926175	0.960015	FALSE
YBR175W	SWD3	0.170014	0.0109345	0.0340373	FALSE
YBR177C	EHT1	0.0612086	0.0763366	0.163794	FALSE	0.334353	11.4147	0
YBR178W	YBR178W	-0.104558	0.300705	0.460396	FALSE
YBR179C	FZO1	-0.0241203	0.780995	0.867646	FALSE	-0.0696061	1.4194	0.525201
YBR180W	DTR1	0.458325	0.0313235	0.080681	FALSE
YBR181C	RPS6B	0.144662	7.28639e-54	3.40009e-52	FALSE	-0.104134	11.3292	0
YBR182C	SMP1	-0.185676	0.0289551	0.0756926	FALSE
YBR182C-A	YBR182C-A	-0.307059	0.145531	0.270125	FALSE
YBR183W	YPC1	0.382608	1.13564e-05	7.28825e-05	FALSE	0.415373	6.08014	0.00120482
YBR184W	YBR184W	-0.0171157	0.942138	0.967357	FALSE
YBR185C	MBA1	0.245013	2.32486e-05	0.000139185	FALSE	-0.0642249	0.538114	0.882135
YBR186W	PCH2	-0.538704	2.69028e-06	1.93274e-05	FALSE
YBR187W	GDT1	3.10976	8.62352e-65	4.78414e-63	FALSE	2.90443	243.1	0
YBR188C	NTC20	3.39117	3.8482e-71	2.28739e-69	FALSE	2.8022	38.8893	0
YBR189W	RPS9B	0.00399411	0.885908	0.938341	FALSE	-0.0211382	0.462437	0.914373
YBR190W	YBR190W	-0.325197	0.0219116	0.0604111	FALSE
YBR191W	RPL21A	0.0502602	2.45603e-11	2.83865e-10	FALSE	-0.00226495	1.10073	0.650808
YBR191W-A	YBR191W-A	-0.241814	3.77945e-06	2.62824e-05	FALSE	-0.0985636	0.481633	0.906026
YBR192W	RIM2	0.478205	6.88583e-09	6.46259e-08	FALSE	0.228228	1.58488	0.46213
YBR193C	MED8	0.363436	8.37499e-06	5.4877e-05	FALSE	0.235141	1.14362	0.63666
YBR194W	AIM4	0.391844	2.61827e-09	2.55332e-08	FALSE	0.265347	3.23531	0.0711755
YBR195C	MSI1	0.463473	3.09169e-10	3.29143e-09	FALSE	0.351323	2.05033	0.300545
YBR196C	PGI1	-0.28433	2.20106e-48	9.31345e-47	FALSE
YBR196C-A	YBR196C-A	-0.962811	0.000174451	0.000885195	FALSE
YBR197C	YBR197C	0.337784	0.0495513	0.116813	FALSE
YBR198C	TAF5	-0.0117097	0.891303	0.940916	FALSE
YBR199W	KTR4	-0.17277	0.0282497	0.0746501	FALSE	-0.11044	1.22513	0.600705
YBR200W	BEM1	-0.106979	0.304805	0.464558	FALSE	-0.154822	0.419857	0.932506
YBR201C-A	YBR201C-A	0.278749	0.0169716	0.0488975	FALSE	-0.296068	1.17362	0.628436
YBR201W	DER1	-0.11555	0.0792893	0.168608	FALSE	-0.0328101	1.80148	0.38504
YBR202W	MCM7	0.0214427	0.78865	0.872747	FALSE	0.0330114	2.45265	0.200835
YBR203W	COS111	0.511616	8.94476e-05	0.000481782	FALSE	0.548403	6.96573	0.000787402
YBR205W	KTR3	-0.252052	0.00669144	0.0225593	FALSE	-0.351693	1.55638	0.472674
YBR207W	FTH1	-0.00458036	0.935979	0.96477	FALSE	0.0662388	0.688029	0.827547
YBR208C	DUR1,2	0.0915493	0.247882	0.400802	FALSE	-0.0409041	1.40851	0.529161
YBR210W	ERV15	0.288765	0.00939119	0.0300964	FALSE	-0.0943248	1.53639	0.479953
YBR211C	AME1	-0.161015	0.218171	0.365915	FALSE	-0.219669	1.44601	0.516905
YBR212W	NGR1	0.224837	0.0294877	0.0768035	FALSE	0.250697	2.35707	0.224466
YBR213W	MET8	-0.0914522	0.197417	0.340485	FALSE	-0.165034	1.02964	0.683303
YBR215W	HPC2	-0.116342	0.191244	0.33306	FALSE	0.116937	1.14541	0.636297
YBR216C	YBP1	-0.161251	0.0876581	0.182687	FALSE	-0.121858	0.937298	0.720535
YBR218C	PYC2	0.0854017	0.212682	0.358273	FALSE	0.106605	2.02302	0.308404
YBR219C	YBR219C	-0.423484	0.0146279	0.0433711	FALSE
YBR220C	YBR220C	-0.435318	0.0118846	0.0366974	FALSE
YBR221C	PDB1	-0.0655289	0.0140286	0.0419932	FALSE	0.0348216	0.63777	0.84617
YBR221W-A	YBR221W-A	-0.115363	0.271704	0.42782	FALSE
YBR222C	PCS60	-0.1505	0.0154271	0.0451923	FALSE	-0.0491533	1.68224	0.42196
YBR223C	TDP1	0.193311	0.12066	0.234419	FALSE
YBR225W	YBR225W	-0.0427392	0.764816	0.856409	FALSE
YBR226C	YBR226C	-0.0820648	0.587446	0.728726	FALSE
YBR227C	MCX1	-0.0778891	0.394691	0.558428	FALSE	-0.113206	0.541403	0.880936
YBR228W	SLX1	-0.140174	0.191133	0.332982	FALSE	0.0418204	1.92516	0.339776
YBR229C	ROT2	0.161713	0.0696089	0.152974	FALSE	0.0108584	0.465082	0.913468
YBR230C	OM14	-0.161837	4.61581e-07	3.64663e-06	FALSE	0.0115341	0.441182	0.922176
YBR230W-A	YBR230W-A	-0.0590352	0.0586948	0.133514	FALSE	-0.0584376	1.2049	0.610963
YBR231C	SWC5	-0.0294241	0.722879	0.826691	FALSE	-0.201379	1.02271	0.686379
YBR233W	PBP2	-0.0387045	0.641023	0.769892	FALSE	0.0880468	0.872263	0.746944
YBR233W-A	DAD3	0.0842967	0.00650261	0.0220868	FALSE	-0.101575	0.6209	0.85273
YBR234C	ARC40	0.0871382	0.00490532	0.0172838	FALSE	0.0803738	0.902706	0.733388
YBR235W	VHC1	-0.0445782	0.490195	0.645431	FALSE	-0.046277	1.84364	0.368891
YBR236C	ABD1	-0.000263577	0.997318	0.999119	FALSE	0.043841	0.574483	0.870551
YBR237W	PRP5	0.0226487	0.845948	0.911878	FALSE	-0.112734	0.65729	0.840954
YBR240C	THI2	-0.0354172	0.802825	0.884099	FALSE	-0.343709	1.78304	0.391213
YBR241C	YBR241C	0.0634904	0.459671	0.618803	FALSE	0.258748	2.38576	0.217579
YBR242W	YBR242W	0.102122	0.357869	0.521553	FALSE	0.239114	1.82979	0.372898
YBR243C	ALG7	0.0606563	0.461544	0.620621	FALSE	0.194266	1.38782	0.534782
YBR244W	GPX2	-0.105679	0.0467997	0.111166	FALSE	-0.152895	1.12941	0.643461
YBR245C	ISW1	-0.0178376	0.795042	0.877269	FALSE	-0.254794	2.78539	0.132182
YBR246W	RRT2	0.28698	0.000127401	0.000667486	FALSE	-0.101791	0.859394	0.751183
YBR247C	ENP1	0.577724	8.11979e-05	0.000440197	FALSE	-0.0309073	0.572145	0.871449
YBR249C	ARO4	-0.27951	1.76011e-34	5.5976e-33	FALSE
YBR251W	MRPS5	-0.217065	0.353326	0.515835	FALSE
YBR252W	DUT1	0.0344707	0.475796	0.632327	FALSE	-0.263077	8.36433	0
YBR253W	SRB6	0.262973	0.001807	0.00721788	FALSE	0.0317912	1.0796	0.662773
YBR255W	MTC4	0.0849181	0.52149	0.671601	FALSE	-0.542488	3.47637	0.0490141
YBR256C	RIB5	0.0763436	0.00814455	0.0265442	FALSE	0.203826	5.03612	0.00310674
YBR257W	POP4	0.0713434	0.672032	0.792503	FALSE	0.354265	2.24386	0.249834
YBR259W	YBR259W	-0.0791806	0.353301	0.515835	FALSE	0.454054	3.17922	0.0767537
YBR260C	RGD1	-0.162653	0.140878	0.263744	FALSE
YBR261C	TAE1	0.135859	0.0307393	0.0794827	FALSE	0.0840792	1.50594	0.491707
YBR262C	MIC12	0.049627	0.468931	0.626864	FALSE	0.00416238	2.31172	0.233551
YBR263W	SHM1	-0.00238803	0.971677	0.98438	FALSE	0.127036	1.65307	0.432282
YBR264C	YPT10	0.0239825	0.761032	0.854112	FALSE	-0.179576	1.34949	0.548368
YBR267W	REI1	-0.0190585	0.786755	0.872173	FALSE	0.0922532	1.40171	0.530444
YBR268W	MRPL37	0.129747	0.00589746	0.02021	FALSE	0.129819	1.54352	0.476785
YBR269C	SDH8	0.0939956	0.246978	0.399598	FALSE	0.125959	1.57589	0.465265
YBR270C	BIT2	-0.0579534	0.689476	0.805088	FALSE	0.20444	0.807467	0.773665
YBR271W	EFM2	0.0421665	0.70157	0.813502	FALSE	0.0411792	1.0598	0.667879
YBR272C	HSM3	0.213228	0.0979518	0.199622	FALSE	-0.0302938	2.07448	0.294178
YBR273C	UBX7	0.016183	0.839369	0.907137	FALSE	-0.17251	0.875744	0.745549
YBR274W	CHK1	0.0263481	0.729384	0.83223	FALSE	-0.149101	1.51547	0.490411
YBR275C	RIF1	0.0817019	0.39744	0.561146	FALSE	-0.0269117	1.36691	0.54188
YBR276C	PPS1	-0.137621	0.225946	0.375675	FALSE	0.00525465	0.263725	0.970499
YBR277C	YBR277C	0.0770234	0.660805	0.782975	FALSE
YBR278W	DPB3	0.166679	0.0142185	0.0424176	FALSE	0.359887	4.4794	0.00892495
YBR279W	PAF1	-0.260481	0.00118631	0.00493603	FALSE	0.0662479	0.723809	0.811818
YBR280C	SAF1	-0.280241	0.00777718	0.0255637	FALSE	-0.257889	1.59698	0.456689
YBR281C	DUG2	0.0253408	0.843819	0.910273	FALSE	0.127148	0.258282	0.971259
YBR282W	MRPL27	0.0431982	0.227123	0.376494	FALSE	-0.247283	3.0078	0.100306
YBR283C	SSH1	0.0836188	0.0076862	0.0253482	FALSE	0.0869711	1.28725	0.577211
YBR286W	APE3	0.259739	0.00299581	0.0112382	FALSE	-0.0332945	0.260203	0.970876
YBR287W	YBR287W	-0.0744037	0.0596046	0.135398	FALSE	-0.18458	4.13556	0.0189091
YBR288C	APM3	-0.00538659	0.931587	0.962817	FALSE	-0.0993467	0.901079	0.733669
YBR289W	SNF5	-0.00667504	0.956494	0.975012	FALSE
YBR290W	BSD2	-0.0248786	0.657986	0.781847	FALSE	-0.299717	3.86982	0.0252836
YBR291C	CTP1	-0.0391485	0.291976	0.452183	FALSE	0.0378541	4.07209	0.0203152
YBR292C	YBR292C	1.1332	8.87379e-10	9.11664e-09	FALSE
YBR293W	VBA2	-0.262899	0.0961281	0.196466	FALSE	0.312559	0.855024	0.753738
YBR294W	SUL1	-0.00867884	0.942499	0.967357	FALSE	-0.629069	4.60815	0.00685225
YBR295W	PCA1	0.61459	0.00056719	0.00254674	FALSE	0.9125	5.73844	0.00120482
YBR297W	MAL33	5.59286	2.90817e-15	4.44052e-14	FALSE	0.318321	3.67987	0.0350462
YBR298C	MAL31	1.24135	1.53479e-16	2.48805e-15	FALSE	1.30558	21.6752	0
YCL001W-B	YCL001W-B	-0.740893	5.55488e-08	4.87443e-07	FALSE
YCL002C	YCL002C	0.093271	0.112295	0.22232	FALSE
YCL005W	LDB16	0.0807955	0.280132	0.437504	FALSE
YCL005W-A	VMA9	-0.608891	0.0057245	0.0196862	FALSE
YCL007C	YCL007C	-0.487071	3.77045e-81	2.54403e-79	FALSE
YCL008C	STP22	-0.174834	0.0712227	0.155698	FALSE
YCL009C	ILV6	0.0840766	0.000254736	0.00124088	FALSE
YCL010C	SGF29	-0.269996	0.017698	0.0505527	FALSE
YCL011C	GBP2	0.0992348	0.137572	0.259	FALSE	-0.0296698	0.326248	0.956395
YCL012C	YCL012C	0.0924908	0.659478	0.782503	FALSE	0.00507125	1.11774	0.645813
YCL014W	BUD3	0.292906	0.0192933	0.0544552	FALSE	-0.085491	1.01988	0.687618
YCL016C	DCC1	-0.157681	0.100948	0.204305	FALSE	-0.428966	1.61373	0.447985
YCL017C	NFS1	0.0245733	0.743182	0.841812	FALSE	0.236585	1.32241	0.5595
YCL022C	YCL022C	-0.430783	0.0872607	0.182298	FALSE
YCL024W	KCC4	-0.465156	0.0247354	0.0666867	FALSE	0.00285072	2.36127	0.223977
YCL025C	AGP1	-0.101852	0.274549	0.430941	FALSE
YCL026C-A	FRM2	0.728183	2.85167e-07	2.29282e-06	FALSE
YCL026C-B	HBN1	1.43083	0	0	TRUE	1.24136	70.9592	0
YCL027W	FUS1	1.13716	4.87318e-05	0.000274935	FALSE	0.283691	1.70338	0.414115
YCL030C	HIS4	-0.114224	0.000617778	0.00274184	FALSE
YCL031C	RRP7	0.388114	0.011334	0.0351275	FALSE
YCL032W	STE50	-0.151962	0.115592	0.226957	FALSE
YCL033C	MXR2	0.285232	4.51624e-15	6.79204e-14	FALSE
YCL034W	LSB5	0.54322	2.27886e-21	4.82133e-20	FALSE
YCL035C	GRX1	0.0652972	0.0151132	0.0444435	FALSE	0.0577698	0.772322	0.789334
YCL036W	GFD2	0.287544	0.000217933	0.00107737	FALSE	0.6317	2.80698	0.128065
YCL037C	SRO9	0.250363	0.0202265	0.0563879	FALSE	0.296925	1.29323	0.575038
YCL043C	PDI1	0.826099	1.6173e-127	1.71812e-125	FALSE
YCL047C	POF1	0.212307	0.000780331	0.00337918	FALSE	0.419593	3.6822	0.0350453
YCL048W	SPS22	0.280209	0.134998	0.255712	FALSE	-0.702748	3.63387	0.037408
YCL049C	YCL049C	-1.41212	1.93833e-36	6.40934e-35	FALSE	-1.32854	41.7372	0
YCL050C	APA1	0.261893	1.11278e-09	1.12929e-08	FALSE	0.114288	3.80243	0.028944
YCL051W	LRE1	0.08631	0.484552	0.640105	FALSE
YCL052C	PBN1	-0.0664689	0.498842	0.652533	FALSE	0.116163	0.620328	0.852992
YCL054W-A	RDT1	-1.91692	1.51427e-08	1.38475e-07	FALSE	-0.268094	2.3567	0.224492
YCL056C	PEX34	0.163378	4.49133e-05	0.000255996	FALSE
YCL057C-A	MIC10	0.0452477	0.011861	0.0366471	FALSE
YCL059C	KRR1	-0.0450676	0.465321	0.624052	FALSE	-0.24469	2.02351	0.308282
YCL061C	MRC1	0.196482	0.0922249	0.190564	FALSE	0.360472	3.05704	0.0954212
YCL064C	CHA1	-0.161268	0.453456	0.613246	FALSE
YCL076W	YCL076W	2.49268	1.341e-17	2.30883e-16	FALSE
YCR001W	YCR001W	-1.04899	7.19073e-15	1.07495e-13	FALSE
YCR002C	CDC10	0.0916829	0.0222487	0.0611381	FALSE
YCR004C	YCP4	-0.0460832	0.202201	0.346052	FALSE	0.0480264	2.05017	0.300581
YCR005C	CIT2	0.230398	9.97244e-06	6.46654e-05	FALSE	0.0796895	2.98899	0.103793
YCR008W	SAT4	-0.0637491	0.284467	0.443177	FALSE
YCR009C	RVS161	-0.0827132	0.0424251	0.103029	FALSE
YCR011C	ADP1	0.11733	0.145224	0.269655	FALSE
YCR013C	YCR013C	0.0108108	0.941392	0.967357	FALSE
YCR014C	POL4	-0.0205188	0.9139	0.953428	FALSE
YCR017C	CWH43	-0.201976	0.0980633	0.199686	FALSE	-0.0838529	1.51665	0.490286
YCR018C-A	YCR018C-A	0.781015	3.89477e-33	1.17858e-31	FALSE
YCR019W	MAK32	0.292813	0.00087003	0.00372242	FALSE
YCR020C	PET18	0.334843	0.000437398	0.0020147	FALSE
YCR020C-A	MAK31	-0.129011	0.000231237	0.00113304	FALSE
YCR021C	HSP30	0.0859454	0.656883	0.781281	FALSE
YCR023C	YCR023C	0.229787	0.0162377	0.0471915	FALSE	-0.208715	2.42595	0.207289
YCR024C	SLM5	-0.241224	0.0691952	0.1524	FALSE	-0.354176	0.851512	0.755792
YCR024C-A	PMP1	-0.0193802	0.412246	0.574956	FALSE	-0.0121342	0.806864	0.773841
YCR026C	NPP1	0.160811	0.080664	0.171094	FALSE	-0.175392	1.42034	0.524885
YCR027C	RHB1	-0.277128	0.000421342	0.00194793	FALSE	-0.488956	3.23915	0.0710054
YCR028C	FEN2	0.115825	0.104447	0.209465	FALSE
YCR028C-A	RIM1	0.505812	1.1151e-90	8.69952e-89	FALSE	0.124872	1.50059	0.492654
YCR030C	SYP1	0.0631668	0.296433	0.456255	FALSE	-1.00635	9.85187	0
YCR031C	RPS14A	-0.0338751	0.816348	0.893927	FALSE	0.141147	2.91588	0.110704
YCR032W	BPH1	0.149952	0.2865	0.445914	FALSE	0.104577	1.23382	0.597693
YCR033W	SNT1	0.12019	0.349493	0.512637	FALSE	-0.0162752	0.516409	0.890783
YCR035C	RRP43	-0.0420906	0.467728	0.625821	FALSE	-0.394552	3.75263	0.0327758
YCR037C	PHO87	-0.0830962	0.249487	0.402551	FALSE	-0.968756	12.1643	0
YCR041W	YCR041W	-0.17472	0.233531	0.382804	FALSE
YCR042C	TAF2	-0.200833	0.0288524	0.0755428	FALSE	-0.658554	2.09997	0.28866
YCR043C	YCR043C	0.133945	9.45211e-06	6.15312e-05	FALSE	-0.768146	17.4495	0
YCR044C	PER1	0.0976385	0.658814	0.782109	FALSE	-0.169596	1.02645	0.68472
YCR046C	IMG1	0.0394722	0.205349	0.349661	FALSE	-0.335067	2.27771	0.243009
YCR047C	BUD23	-0.150965	0.00216319	0.00847123	FALSE	-0.255391	1.91368	0.343445
YCR050C	YCR050C	0.0929177	0.37889	0.542996	FALSE
YCR054C	CTR86	-0.191426	2.8052e-05	0.00016517	FALSE	-0.295793	4.61275	0.00676538
YCR059C	YIH1	0.0696254	0.221216	0.369904	FALSE	-0.0831911	0.404072	0.934876
YCR060W	TAH1	0.644916	5.5369e-38	1.93327e-36	FALSE	0.509101	6.42369	0.000787402
YCR067C	SED4	-0.219116	0.141771	0.264831	FALSE	0.174304	0.420635	0.932251
YCR071C	IMG2	-0.0899555	0.00730468	0.0242825	FALSE	0.0878381	0.554448	0.876523
YCR072C	RSA4	-0.220314	0.333602	0.494999	FALSE	-0.0622283	0.140935	0.992691
YCR073C	SSK22	-0.0574836	0.636844	0.766762	FALSE
YCR075C	ERS1	-0.0344217	0.575869	0.719008	FALSE
YCR076C	FUB1	0.220718	0.00229964	0.00892161	FALSE	0.164038	0.762694	0.793811
YCR084C	TUP1	-0.302584	0.168058	0.302928	FALSE	-0.0740146	1.09223	0.656024
YCR085W	YCR085W	0.881958	7.27914e-06	4.82026e-05	FALSE
YCR087C-A	YCR087C-A	-0.107556	0.00564832	0.0194766	FALSE	-0.0198843	0.528111	0.885898
YCR087W	YCR087W	-0.100523	0.00961278	0.0306604	FALSE
YCR089W	FIG2	6.54827e-16	1	1	FALSE	0.269194	1.73184	0.406966
YCR090C	YCR090C	-0.0549067	0.188687	0.330205	FALSE	0.0860074	1.21031	0.607449
YCR093W	CDC39	-0.289511	0.0427329	0.103543	FALSE	-0.0599486	0.294097	0.963339
YCR095C	OCA4	-0.00154734	0.979682	0.989592	FALSE	-0.0693442	0.761619	0.794324
YCR098C	GIT1	1.81101	9.38734e-13	1.22379e-11	FALSE
YCR099C	YCR099C	0.650549	0.0010871	0.00456126	FALSE
YCR102C	YCR102C	-0.450143	4.01835e-06	2.77889e-05	FALSE	-0.847801	8.07481	0
YCR106W	RDS1	0.876059	7.80452e-10	8.0679e-09	FALSE
YCR107W	AAD3	2.40306	1.16704e-85	8.44496e-84	FALSE
YDL001W	RMD1	-0.187935	0.204192	0.347963	FALSE	0.250099	0.813357	0.771479
YDL002C	NHP10	-0.0639581	0.293129	0.453125	FALSE	0.220361	0.911182	0.731887
YDL003W	MCD1	0.0315495	0.647771	0.774687	FALSE	0.0225986	1.44995	0.515578
YDL004W	ATP16	-0.0177291	0.789572	0.873336	FALSE	-0.0373398	0.880333	0.743673
YDL005C	MED2	-0.33572	2.36303e-09	2.30893e-08	FALSE	-0.245836	2.22618	0.255595
YDL006W	PTC1	-0.118493	0.0750124	0.161603	FALSE	-0.15217	0.906794	0.732682
YDL007W	RPT2	0.388222	0.0520456	0.121512	FALSE	-0.145387	4.09617	0.0195991
YDL008W	APC11	0.400889	3.02956e-14	4.32189e-13	FALSE	0.443488	9.75123	0
YDL009C	YDL009C	-0.202668	0.000326852	0.00154836	FALSE
YDL010W	GRX6	-0.24695	2.52072e-06	1.8267e-05	FALSE	-0.407805	4.37721	0.0111024
YDL011C	YDL011C	-0.343396	0.0972504	0.198435	FALSE
YDL013W	SLX5	-0.0198525	0.855657	0.919564	FALSE	0.0281694	0.976233	0.703872
YDL014W	NOP1	0.40734	1.9591e-06	1.44487e-05	FALSE	0.0245097	0.874447	0.746069
YDL015C	TSC13	0.0198447	0.428689	0.590794	FALSE	0.0594956	2.53795	0.176368
YDL016C	YDL016C	0.160611	0.276031	0.432724	FALSE	-0.209584	0.779283	0.786369
YDL017W	CDC7	0.152857	0.286783	0.446077	FALSE	0.104049	2.44344	0.202404
YDL018C	ERP3	-0.109602	0.0273818	0.0727763	FALSE
YDL019C	OSH2	-0.314174	0.00232567	0.0090086	FALSE
YDL020C	RPN4	0.192645	0.00568303	0.0195827	FALSE	0.164418	1.5547	0.473123
YDL021W	GPM2	-0.131899	0.396528	0.56071	FALSE	0.174156	0.567898	0.872862
YDL025C	RTK1	-0.177671	0.30644	0.46648	FALSE	0.0107487	0.653543	0.842082
YDL025W-A	YDL025W-A	-0.36546	0.10156	0.204968	FALSE
YDL027C	MRX9	0.306485	1.77601e-05	0.000109477	FALSE	0.211797	1.95849	0.326447
YDL028C	MPS1	0.351876	0.00137949	0.00566896	FALSE	0.121164	1.40284	0.53023
YDL029W	ARP2	0.14152	8.02123e-05	0.0004358	FALSE	0.0469724	0.357147	0.947701
YDL030W	PRP9	0.176224	0.0710895	0.155612	FALSE	0.0590814	0.357183	0.947688
YDL031W	DBP10	-0.249711	0.000525437	0.00237637	FALSE	0.270471	1.73105	0.407114
YDL033C	SLM3	0.173592	0.238269	0.388783	FALSE
YDL035C	GPR1	0.108378	0.230869	0.380187	FALSE	-0.183904	1.00539	0.692239
YDL036C	PUS9	-0.213252	0.0586264	0.133419	FALSE	0.115087	0.967	0.707147
YDL039C	PRM7	-0.776326	0.00170993	0.00687966	FALSE
YDL040C	NAT1	-0.103555	0.222599	0.371222	FALSE	-0.253083	2.28384	0.241796
YDL042C	SIR2	-0.0403942	0.679077	0.796671	FALSE	0.314322	2.29428	0.240007
YDL043C	PRP11	0.114805	0.123694	0.238825	FALSE
YDL044C	MTF2	0.337485	0.03474	0.0877373	FALSE	-0.0435787	0.406649	0.934319
YDL045C	FAD1	0.0632272	0.334674	0.495854	FALSE	0.00421727	0.64256	0.844882
YDL045W-A	MRP10	0.240949	3.81926e-11	4.34387e-10	FALSE	0.252385	5.19562	0.00204604
YDL046W	NPC2	0.0823072	0.0035031	0.0129563	FALSE	0.226553	6.38959	0.000787402
YDL047W	SIT4	-0.108656	0.087048	0.182009	FALSE	0.195871	0.998608	0.694774
YDL048C	STP4	-0.127836	0.0968201	0.197719	FALSE
YDL049C	KNH1	0.030765	0.71269	0.82019	FALSE	-0.705762	6.35133	0.000787402
YDL052C	SLC1	0.0614184	0.173513	0.30919	FALSE
YDL053C	PBP4	0.00669145	0.883298	0.936599	FALSE	0.0751814	1.51197	0.49078
YDL054C	MCH1	0.336611	0.0464263	0.110489	FALSE	-0.255632	2.81799	0.125944
YDL055C	PSA1	-0.208075	3.00323e-71	1.80664e-69	FALSE	-0.321838	20.0164	0
YDL056W	MBP1	0.406226	2.5674e-05	0.000152245	FALSE	-0.130546	1.32582	0.55812
YDL058W	USO1	0.205927	0.0180101	0.0513267	FALSE	-0.110267	1.58353	0.462597
YDL059C	RAD59	0.13441	0.106832	0.213364	FALSE	0.00476596	1.93341	0.336275
YDL060W	TSR1	0.223658	0.131475	0.250746	FALSE	-0.31731	3.41559	0.0544362
YDL062W	YDL062W	-0.0555699	0.813687	0.891907	FALSE
YDL063C	SYO1	-0.0999067	0.146081	0.270958	FALSE	-0.30161	1.97458	0.321594
YDL064W	UBC9	0.293791	0.000457313	0.00209913	FALSE	0.210668	3.71127	0.0342821
YDL065C	PEX19	-0.198583	0.00659071	0.0223556	FALSE	0.0390047	0.537036	0.882516
YDL066W	IDP1	0.236389	0.333101	0.494844	FALSE	-0.211665	4.94484	0.00379147
YDL067C	COX9	0.106507	8.28126e-23	1.84591e-21	FALSE	0.0502819	2.32525	0.229993
YDL069C	CBS1	0.202552	0.00414901	0.0150225	FALSE	0.0656938	0.683391	0.829013
YDL070W	BDF2	0.105	0.0454194	0.108403	FALSE	0.0249554	1.25936	0.587306
YDL071C	YDL071C	-0.162194	0.445707	0.60605	FALSE
YDL072C	YET3	0.489135	6.23764e-56	3.05339e-54	FALSE	0.0266919	0.784736	0.783712
YDL073W	AHK1	-0.0273529	0.7588	0.853017	FALSE	-0.157578	1.36673	0.54195
YDL074C	BRE1	0.135109	0.0782811	0.167248	FALSE	0.0577391	0.744594	0.80224
YDL076C	RXT3	0.22714	6.7383e-05	0.000369312	FALSE	0.106341	0.931682	0.723094
YDL077C	VAM6	0.267364	0.0011847	0.00493346	FALSE	-0.0608042	0.443162	0.921296
YDL078C	MDH3	0.229009	7.52561e-06	4.97029e-05	FALSE	0.0470893	1.90609	0.345157
YDL079C	MRK1	0.133841	0.227193	0.376494	FALSE
YDL080C	THI3	0.0652231	0.712105	0.82019	FALSE	0.222387	1.44135	0.518475
YDL081C	RPP1A	0.0421996	5.59614e-13	7.41155e-12	FALSE	-0.0114481	1.7802	0.392004
YDL082W	RPL13A	-0.0432439	0.661902	0.783889	FALSE	0.0128489	3.74246	0.0328173
YDL083C	RPS16B	0.151725	1.7699e-27	4.62676e-26	FALSE	0.0862607	8.08235	0
YDL084W	SUB2	0.00194954	0.918403	0.954996	FALSE	-0.00991806	1.06979	0.665838
YDL085C-A	YDL085C-A	-0.586488	1.79764e-26	4.44337e-25	FALSE	-0.414521	10.8575	0
YDL086C-A	YDL086C-A	-0.757686	0.000616313	0.00273777	FALSE
YDL086W	YDL086W	-0.247829	2.89842e-07	2.32666e-06	FALSE	-0.596129	16.0469	0
YDL087C	LUC7	0.173272	0.437273	0.59833	FALSE
YDL088C	ASM4	-0.0730669	0.362515	0.526184	FALSE	-0.196551	3.00292	0.100472
YDL089W	NUR1	0.0167222	0.8205	0.896053	FALSE	-0.043259	0.64987	0.843179
YDL090C	RAM1	0.00828756	0.939014	0.966297	FALSE	-0.051973	0.405763	0.934511
YDL091C	UBX3	0.309552	0.0601691	0.136465	FALSE	-0.0628939	3.39337	0.0564384
YDL092W	SRP14	0.0434666	0.157715	0.28824	FALSE	0.176208	3.54645	0.0427919
YDL093W	PMT5	-0.24042	0.168366	0.303266	FALSE	-0.117904	1.86389	0.361352
YDL094C	YDL094C	-0.374161	3.19414e-12	4.01721e-11	FALSE
YDL095W	PMT1	-0.310228	8.22554e-14	1.14721e-12	FALSE
YDL097C	RPN6	-0.0373839	0.3522	0.514945	FALSE	0.186233	4.23978	0.0162326
YDL098C	SNU23	-0.109831	0.326907	0.488551	FALSE	0.253437	1.15855	0.633048
YDL099W	BUG1	-0.0263558	0.664779	0.786733	FALSE	-0.166871	0.640871	0.845275
YDL100C	GET3	-0.0407767	0.222365	0.371203	FALSE	0.0514348	2.02658	0.30751
YDL101C	DUN1	-0.147229	0.0432633	0.104506	FALSE	-0.111747	1.57922	0.464096
YDL102W	POL3	0.0269676	0.832701	0.905067	FALSE
YDL103C	QRI1	0.243175	1.18315e-05	7.56395e-05	FALSE	0.134763	1.75633	0.400665
YDL104C	QRI7	0.102002	0.340993	0.502657	FALSE
YDL106C	PHO2	-0.329981	0.0035351	0.0130264	FALSE	-0.189599	0.946445	0.716342
YDL107W	MSS2	0.00628407	0.951108	0.972534	FALSE	0.0601468	2.50001	0.188389
YDL108W	KIN28	-0.0306914	0.733103	0.834578	FALSE	-0.0943973	1.46841	0.509829
YDL110C	TMA17	-0.13908	0.000118423	0.000625701	FALSE	-0.103983	1.84269	0.36898
YDL111C	RRP42	-0.130636	0.0212379	0.058879	FALSE	0.0653495	0.425796	0.930302
YDL112W	TRM3	-0.061817	0.627171	0.760122	FALSE	-0.0571241	0.537288	0.882427
YDL113C	ATG20	-0.116676	0.331267	0.493086	FALSE	-0.0280411	0.263221	0.970553
YDL115C	IWR1	0.0493345	0.520095	0.670324	FALSE	0.11058	1.99826	0.314335
YDL116W	NUP84	-0.00939503	0.897388	0.944838	FALSE	0.0145545	1.73922	0.405599
YDL117W	CYK3	0.0310257	0.709342	0.819371	FALSE	0.36246	3.05153	0.0964148
YDL119C	HEM25	-0.249323	0.0370115	0.0922147	FALSE	0.402557	1.58356	0.462587
YDL120W	YFH1	-0.256226	1.34118e-13	1.83467e-12	FALSE	-0.058237	0.765124	0.792651
YDL121C	YDL121C	0.0748311	0.0136863	0.0412863	FALSE	-0.0927794	1.62482	0.443324
YDL122W	UBP1	0.0773842	0.575074	0.718375	FALSE	-0.0775176	1.40968	0.528942
YDL123W	SNA4	0.0190722	0.764084	0.856358	FALSE	0.177187	1.18417	0.623006
YDL124W	YDL124W	0.32499	5.62717e-07	4.42464e-06	FALSE	0.292049	5.26267	0.00204604
YDL125C	HNT1	0.164833	1.3139e-08	1.20816e-07	FALSE	0.190371	9.64411	0
YDL126C	CDC48	0.0506711	0.0488976	0.115326	FALSE
YDL128W	VCX1	-0.0867839	0.0995282	0.201764	FALSE	0.0743858	1.73697	0.406016
YDL130W	RPP1B	-0.346736	8.48872e-24	1.97136e-22	FALSE
YDL130W-A	STF1	0.222466	3.47529e-11	3.96167e-10	FALSE	0.4183	15.3154	0
YDL131W	LYS21	0.0677242	0.0161727	0.0470572	FALSE	0.337172	12.223	0
YDL132W	CDC53	-0.0394331	0.793964	0.876467	FALSE	-0.261067	4.40633	0.0106931
YDL133C-A	RPL41B	-0.204972	0.00015955	0.000815389	FALSE	-0.0554255	3.36388	0.0590686
YDL135C	RDI1	0.0597005	0.0893472	0.18557	FALSE	-0.0370142	1.5361	0.480102
YDL136W	RPL35B	0.0472504	1.81722e-06	1.3462e-05	FALSE
YDL138W	RGT2	-0.174222	0.0981919	0.199866	FALSE	-0.0770456	1.06833	0.66613
YDL139C	SCM3	0.0719753	0.593604	0.734721	FALSE
YDL140C	RPO21	0.0781742	0.119356	0.232354	FALSE	0.0498491	0.972409	0.705297
YDL141W	BPL1	0.0101427	0.832551	0.905067	FALSE	-0.2091	1.44996	0.515574
YDL143W	CCT4	-0.0449179	0.819006	0.895238	FALSE	0.0523897	3.48436	0.0490141
YDL144C	YDL144C	-0.0238784	0.633513	0.76441	FALSE	0.14733	0.943668	0.717618
YDL145C	COP1	0.181614	0.208798	0.353689	FALSE	-0.12582	2.08938	0.29122
YDL146W	LDB17	-0.0927817	0.569052	0.71371	FALSE	0.0805097	0.720254	0.813063
YDL147W	RPN5	-0.20961	1.58154e-09	1.5699e-08	FALSE	-0.179082	3.62156	0.0383161
YDL148C	NOP14	0.0471415	0.6209	0.754914	FALSE	-0.0643708	1.87631	0.355722
YDL149W	ATG9	0.125628	0.37252	0.53757	FALSE	-0.206999	0.980504	0.702194
YDL150W	RPC53	-0.0440482	0.736243	0.836975	FALSE	-0.0458443	0.840966	0.759178
YDL152W	YDL152W	0.0249189	0.812749	0.891293	FALSE
YDL153C	SAS10	0.073689	0.202624	0.346473	FALSE	0.127814	1.35934	0.544767
YDL156W	CMR1	0.280302	0.217369	0.364986	FALSE
YDL157C	YDL157C	-0.0414119	0.14887	0.274689	FALSE	-0.0958835	1.84288	0.368962
YDL158C	YDL158C	0.0388916	0.438962	0.599983	FALSE
YDL159W	STE7	0.0393676	0.430869	0.592653	FALSE	0.348626	3.90383	0.0244224
YDL160C	DHH1	0.0964731	0.515692	0.66706	FALSE
YDL160C-A	MHF2	-0.0792307	0.197064	0.340228	FALSE	-0.135085	1.92166	0.341225
YDL161W	ENT1	-0.101451	0.483835	0.639435	FALSE	-0.12899	1.11548	0.646715
YDL164C	CDC9	-0.0619108	0.371955	0.537065	FALSE	0.23872	2.50643	0.186612
YDL165W	CDC36	0.273944	2.05355e-09	2.01442e-08	FALSE	0.45937	9.73422	0
YDL166C	FAP7	0.255379	2.37299e-07	1.92656e-06	FALSE	0.0865621	1.4152	0.526844
YDL167C	NRP1	0.722434	3.81456e-74	2.44181e-72	FALSE
YDL168W	SFA1	0.984003	7.92711e-132	8.99547e-130	TRUE
YDL171C	GLT1	-0.0301678	0.221388	0.370067	FALSE	-0.0620753	1.14138	0.637113
YDL172C	YDL172C	-0.535517	0.0371968	0.0925379	FALSE
YDL173W	PAR32	0.130586	0.0276142	0.0731834	FALSE	0.13838	0.770256	0.790214
YDL174C	DLD1	0.164072	0.0322182	0.0825798	FALSE	0.105979	2.29764	0.239515
YDL179W	PCL9	0.052661	0.818594	0.895238	FALSE	0.119664	0.980033	0.702449
YDL180W	YDL180W	-0.116407	0.156474	0.286182	FALSE	-0.186551	1.78375	0.391016
YDL181W	INH1	0.113655	7.95393e-08	6.84724e-07	FALSE
YDL182W	LYS20	0.356865	1.15138e-37	3.93758e-36	FALSE
YDL183C	YDL183C	0.10467	0.455733	0.615493	FALSE
YDL184C	RPL41A	0.145118	1.21255e-146	1.59323e-144	FALSE	-0.0617183	3.85669	0.0254943
YDL185C-A	YDL185C-A	-3.45434	1.65797e-29	4.57361e-28	FALSE
YDL185W	VMA1	-0.870925	0.000106885	0.000571387	FALSE	0.0390863	1.46467	0.510737
YDL186W	YDL186W	-2.66351	7.12431e-38	2.47026e-36	FALSE
YDL188C	PPH22	-0.0545518	0.400172	0.563946	FALSE	-0.0983822	1.54773	0.47522
YDL189W	RBS1	0.0891282	0.256844	0.410521	FALSE	0.00883238	0.935977	0.721137
YDL190C	UFD2	0.297252	0.000115705	0.000614588	FALSE	0.463194	3.6848	0.0350453
YDL191W	RPL35A	0.229792	5.63147e-130	6.1126e-128	FALSE	-0.0501894	3.92944	0.0235427
YDL192W	ARF1	0.00711651	0.560222	0.704759	FALSE	-0.0203555	2.77517	0.134844
YDL193W	NUS1	-0.124087	0.200944	0.344704	FALSE	-0.072704	1.37869	0.538404
YDL194W	SNF3	0.2644	0.198877	0.342294	FALSE
YDL195W	SEC31	-0.426864	0.0440301	0.105741	FALSE	0.0147059	0.870304	0.747729
YDL197C	ASF2	0.13679	0.20877	0.353689	FALSE
YDL198C	GGC1	0.0502524	0.0511101	0.119753	FALSE	0.102218	1.04579	0.674198
YDL199C	YDL199C	0.020113	0.908983	0.950646	FALSE
YDL200C	MGT1	0.0781665	0.345616	0.508594	FALSE	-0.075926	1.22567	0.600501
YDL202W	MRPL11	0.0192298	0.768464	0.859338	FALSE	0.106474	0.305413	0.96141
YDL203C	ACK1	0.0724853	0.4022	0.565209	FALSE	0.0571901	1.49475	0.496457
YDL204W	RTN2	-0.043763	0.775276	0.863859	FALSE	0.117036	2.35679	0.224485
YDL206W	YDL206W	-0.149295	0.151618	0.278524	FALSE	-0.0230448	1.71301	0.410922
YDL207W	GLE1	-0.0596006	0.452788	0.612841	FALSE	0.057376	0.846285	0.757705
YDL208W	NHP2	-0.128799	1.51604e-06	1.13657e-05	FALSE	0.0163273	1.1688	0.630665
YDL209C	CWC2	-0.0579534	0.484598	0.640105	FALSE
YDL210W	UGA4	0.121361	0.622674	0.756267	FALSE
YDL211C	YDL211C	-0.217505	0.0533856	0.124012	FALSE	0.151786	0.530721	0.884751
YDL212W	SHR3	0.0143515	0.70608	0.817325	FALSE	0.119094	3.52122	0.044784
YDL213C	NOP6	0.169072	2.15579e-05	0.000130629	FALSE	0.225445	2.17877	0.26918
YDL215C	GDH2	-0.0835139	0.396833	0.560981	FALSE	-0.185264	2.93864	0.108128
YDL216C	RRI1	-0.327877	0.0739201	0.160045	FALSE	0.163037	1.10369	0.650201
YDL217C	TIM22	0.00283774	0.960046	0.977469	FALSE	0.0395553	2.04603	0.302356
YDL219W	DTD1	-0.163709	5.3201e-05	0.00029711	FALSE	-0.863761	52.1117	0
YDL220C	CDC13	0.0175125	0.923904	0.95867	FALSE
YDL221W	YDL221W	-0.329356	0.0345625	0.0874661	FALSE
YDL223C	HBT1	1.25336	1.52989e-09	1.5247e-08	FALSE
YDL224C	WHI4	-0.184878	0.0099699	0.0316277	FALSE	-0.744235	9.70136	0
YDL225W	SHS1	0.134054	0.260965	0.415688	FALSE	0.0310749	2.97909	0.105166
YDL226C	GCS1	-0.0171437	0.760122	0.853488	FALSE	-0.0839668	0.426386	0.930079
YDL228C	YDL228C	1.7403	0	0	FALSE
YDL229W	SSB1	1.72653	0	0	FALSE	0.106489	6.33493	0.000787402
YDL230W	PTP1	-0.522111	7.09789e-08	6.14207e-07	FALSE	-0.419871	2.77053	0.136031
YDL231C	BRE4	0.347515	1.7777e-37	6.03814e-36	FALSE	-0.204742	3.17663	0.0772064
YDL232W	OST4	0.344902	1.02422e-47	4.22637e-46	FALSE	0.241255	14.3957	0
YDL233W	MFG1	-0.436444	0.00138911	0.00570381	FALSE	-0.548086	4.02529	0.021231
YDL234C	GYP7	0.230073	0.0216932	0.0600411	FALSE
YDL235C	YPD1	0.259114	5.10875e-12	6.31386e-11	FALSE	-0.048949	1.55628	0.472702
YDL236W	PHO13	-0.0458018	0.0784425	0.167306	FALSE	-0.230684	4.60264	0.00685225
YDL237W	AIM6	0.160352	0.000391582	0.00182556	FALSE	0.203835	4.16874	0.0183486
YDL238C	GUD1	-0.67809	1.12224e-07	9.44916e-07	FALSE
YDL239C	ADY3	0.434346	0.00172597	0.0069219	FALSE	0.305885	1.38399	0.536385
YDL241W	YDL241W	0.767255	0.00122472	0.00508648	FALSE
YDL243C	AAD4	-1.48521	1.55847e-68	8.94421e-67	FALSE	-0.15052	1.19511	0.617154
YDL248W	COS7	1.28566	0	0	FALSE	0.279322	4.11752	0.0189964
YDR003W	RCR2	-0.0168992	0.839258	0.907137	FALSE
YDR003W-A	YDR003W-A	0.0311334	0.661537	0.783642	FALSE	0.426489	4.70225	0.0044843
YDR004W	RAD57	0.0795053	0.414568	0.576905	FALSE	0.219983	0.839258	0.759817
YDR005C	MAF1	0.099054	0.112497	0.222591	FALSE	0.0641776	1.65411	0.43188
YDR006C	SOK1	0.0833975	0.310458	0.470588	FALSE	-0.0536014	0.752357	0.798476
YDR007W	TRP1	-0.0503387	0.338586	0.500295	FALSE	0.140699	2.53963	0.175544
YDR008C	YDR008C	-0.0503387	0.338586	0.500295	FALSE
YDR011W	SNQ2	0.0689076	0.715525	0.82148	FALSE	-0.0137065	1.07354	0.664683
YDR012W	RPL4B	0.11686	5.78892e-22	1.24586e-20	FALSE	-0.0672939	2.33205	0.228742
YDR014W	RAD61	-0.0374486	0.743175	0.841812	FALSE
YDR014W-A	HED1	0.354391	0.0272818	0.0725723	FALSE
YDR017C	KCS1	0.118838	0.243918	0.395545	FALSE	0.069242	1.99698	0.314678
YDR019C	GCV1	-0.113665	0.0200385	0.0560691	FALSE	0.156573	1.50802	0.491338
YDR020C	DAS2	-0.0336965	0.795745	0.877851	FALSE
YDR021W	FAL1	0.0654615	0.463112	0.621926	FALSE	-0.16086	0.460949	0.914883
YDR022C	ATG31	-0.00363431	0.959688	0.977304	FALSE	0.0432641	0.216952	0.979817
YDR023W	SES1	0.0239511	0.535312	0.684283	FALSE	-0.080095	1.72348	0.408791
YDR026C	NSI1	0.0221063	0.86665	0.925402	FALSE	0.103761	1.11891	0.645347
YDR027C	VPS54	0.0737023	0.668696	0.790249	FALSE	-0.0544917	1.07735	0.663481
YDR028C	REG1	0.177505	0.00811883	0.0264823	FALSE	0.135219	0.772982	0.789052
YDR029W	YDR029W	0.185717	0.336618	0.498291	FALSE
YDR030C	RAD28	0.326826	0.0627326	0.140775	FALSE
YDR031W	MIX14	-0.137485	1.79953e-07	1.49006e-06	FALSE	-0.022791	0.336518	0.954101
YDR032C	PST2	-0.0848921	0.000963377	0.00409025	FALSE	-0.240014	10.0958	0
YDR033W	MRH1	0.0795981	0.167659	0.302757	FALSE
YDR034C	LYS14	0.192272	0.000130112	0.000678128	FALSE
YDR034C-A	YDR034C-A	-2.68407	3.88739e-82	2.65886e-80	FALSE
YDR034W-B	YDR034W-B	-0.204877	0.0134489	0.0407467	TRUE	-1.20594	51.6757	0
YDR035W	ARO3	0.688799	7.19281e-58	3.62765e-56	TRUE	0.955387	47.7473	0
YDR036C	EHD3	2.7824	3.66857e-90	2.81802e-88	FALSE	2.15523	24.8776	0
YDR037W	KRS1	0.570664	1.17052e-88	8.85519e-87	FALSE	0.0792462	1.74664	0.403431
YDR038C	ENA5	3.88155	1.88767e-14	2.73192e-13	FALSE
YDR040C	ENA1	-2.10204	9.84887e-11	1.10259e-09	FALSE
YDR041W	RSM10	0.0301263	0.51079	0.662178	FALSE	0.058645	1.20118	0.613419
YDR042C	YDR042C	0.11252	0.0483267	0.114142	FALSE
YDR043C	NRG1	0.388936	0.0190187	0.0537793	FALSE	-0.0585643	1.52566	0.48615
YDR044W	HEM13	-0.0372392	0.634895	0.765602	FALSE	-0.314188	3.24572	0.0709677
YDR045C	RPC11	0.216169	7.09421e-06	4.71656e-05	FALSE	0.561656	17.659	0
YDR047W	HEM12	-0.000252122	0.996732	0.999119	FALSE	-0.251348	2.52985	0.180287
YDR048C	YDR048C	0.383538	0.117681	0.229704	FALSE
YDR049W	VMS1	-0.00823242	0.928453	0.961632	FALSE	-0.336297	1.21028	0.60746
YDR050C	TPI1	-0.144531	3.24765e-58	1.65465e-56	FALSE	-0.0787297	7.38829	0.000787402
YDR051C	DET1	-0.0712232	0.184636	0.32518	FALSE	-0.219806	1.5582	0.472188
YDR052C	DBF4	-0.0165494	0.831855	0.904891	FALSE	-0.148584	0.4203	0.932377
YDR053W	YDR053W	-0.157629	0.458553	0.618465	FALSE
YDR054C	CDC34	0.0247924	0.789438	0.873336	FALSE
YDR055W	PST1	-0.0710338	0.117013	0.228937	TRUE	-0.0202597	2.38912	0.216253
YDR056C	EMC10	0.130812	0.000297983	0.0014306	FALSE	0.0752058	0.916244	0.730855
YDR057W	YOS9	0.0943218	0.226289	0.375967	FALSE	-0.0711139	0.318576	0.958668
YDR058C	TGL2	0.0881831	0.321662	0.482011	FALSE	0.146687	0.654263	0.841866
YDR059C	UBC5	0.172072	0.0274821	0.0729496	FALSE	-0.0907967	1.50499	0.491875
YDR060W	MAK21	-0.0345088	0.528061	0.677269	FALSE	0.024283	1.01982	0.687633
YDR061W	YDR061W	0.0698995	0.516643	0.667635	FALSE	0.0904835	0.958325	0.710262
YDR062W	LCB2	0.211042	1.90409e-05	0.000116795	FALSE	-0.0229665	1.08596	0.659567
YDR063W	AIM7	0.0556529	0.600927	0.740299	FALSE	-0.113436	0.563422	0.874117
YDR065W	RRG1	-0.115044	0.242669	0.394673	FALSE
YDR066C	RTR2	0.103489	0.141522	0.264831	FALSE	0.210333	1.24032	0.595647
YDR067C	OCA6	-0.157765	0.0882379	0.183648	FALSE	-0.00365166	0.368792	0.944417
YDR068W	DOS2	0.00944827	0.861029	0.922634	FALSE	-0.124017	2.78658	0.131868
YDR069C	DOA4	0.139124	0.209774	0.35457	FALSE	0.117338	0.836931	0.760979
YDR070C	FMP16	0.596976	3.77158e-06	2.62643e-05	FALSE	-0.306284	2.07317	0.294405
YDR071C	PAA1	0.164626	5.50155e-11	6.20073e-10	FALSE	0.0768964	1.84148	0.369093
YDR072C	IPT1	-0.0159505	0.877645	0.932754	FALSE	-0.0570596	0.736111	0.806536
YDR073W	SNF11	-0.0454953	0.444298	0.604957	FALSE	-0.20881	1.90453	0.345484
YDR074W	TPS2	0.129499	0.0683384	0.150979	FALSE	0.29813	5.93397	0.00120482
YDR075W	PPH3	0.103015	0.212131	0.357706	FALSE	0.0894802	0.479862	0.90697
YDR076W	RAD55	0.0936657	0.388	0.551332	FALSE
YDR077W	SED1	-0.225281	9.7696e-46	3.96582e-44	FALSE	-0.209252	11.0709	0
YDR078C	SHU2	-0.182322	0.394423	0.558208	FALSE
YDR079C-A	TFB5	0.105889	0.00685545	0.02305	FALSE	0.259219	7.62813	0.000787402
YDR079W	PET100	0.1118	0.00515338	0.0180062	FALSE	-0.0314279	1.01266	0.689642
YDR080W	VPS41	0.201594	0.0662602	0.147432	FALSE	0.179513	1.28247	0.577828
YDR081C	PDC2	-0.240889	0.0619573	0.139537	FALSE	0.100772	0.962642	0.708529
YDR082W	STN1	-0.0496826	0.62652	0.759861	FALSE	-0.0790434	1.31256	0.56481
YDR083W	RRP8	0.187392	1.05643e-07	8.94026e-07	FALSE	0.121281	0.886506	0.74052
YDR084C	TVP23	0.231958	1.65058e-09	1.63519e-08	FALSE	0.173438	3.0425	0.0973133
YDR085C	AFR1	0.31941	0.00106922	0.00449758	FALSE	0.539759	8.61284	0
YDR086C	SSS1	-0.0304066	0.0282906	0.0746501	FALSE	-0.117483	6.55992	0.000787402
YDR087C	RRP1	0.313317	7.2244e-06	4.79036e-05	FALSE	0.104257	0.393839	0.938194
YDR088C	SLU7	0.298103	0.0136562	0.0412247	FALSE
YDR089W	VTC5	-0.0883689	0.217349	0.364986	FALSE	-0.419491	4.06969	0.0203152
YDR092W	UBC13	0.111661	0.00744128	0.0246709	FALSE	0.218099	2.67711	0.151014
YDR093W	DNF2	-0.456758	0.0275853	0.0731457	FALSE
YDR096W	GIS1	-0.169589	0.429544	0.591335	FALSE	0.0846332	1.89007	0.348988
YDR097C	MSH6	-0.27289	0.0406107	0.0994942	FALSE	-0.304455	1.45208	0.514791
YDR098C	GRX3	0.0360281	0.710366	0.819515	FALSE	-0.00298694	0.583225	0.867027
YDR099W	BMH2	0.113287	0.0822042	0.173477	FALSE	-0.00906826	0.981775	0.701504
YDR100W	TVP15	-0.0708261	0.203855	0.347963	FALSE	-0.093068	1.29799	0.572353
YDR101C	ARX1	-0.0733313	0.612584	0.748022	FALSE	-0.0408788	0.698349	0.822933
YDR103W	STE5	0.231408	0.135001	0.255712	FALSE	0.307485	1.05644	0.669292
YDR104C	SPO71	-0.210784	0.128696	0.246862	FALSE
YDR107C	TMN2	0.400721	0.00615898	0.020991	FALSE	0.471433	2.05609	0.299274
YDR108W	TRS85	-0.0965674	0.322719	0.483159	FALSE	-0.0591163	0.842509	0.758751
YDR109C	YDR109C	0.0219789	0.916514	0.954996	FALSE	-0.174542	1.57581	0.465297
YDR110W	FOB1	-0.013645	0.874101	0.930771	FALSE	0.272735	1.50578	0.491735
YDR111C	ALT2	0.24272	0.0345509	0.0874661	FALSE	-0.433548	2.28108	0.242316
YDR113C	PDS1	-0.11965	0.170388	0.305694	FALSE	0.149019	2.84155	0.121954
YDR114C	YDR114C	0.728201	4.1558e-18	7.41068e-17	FALSE
YDR115W	MRX14	0.256282	2.20139e-23	5.042e-22	FALSE	0.336245	16.7238	0
YDR116C	MRPL1	-0.0355478	0.685874	0.802007	FALSE	-0.0918371	2.20653	0.261998
YDR117C	TMA64	0.296357	0.00107376	0.00451014	FALSE	-0.0772076	0.532311	0.884188
YDR118W	APC4	0.472688	0.000296579	0.00142523	FALSE
YDR118W-A	YDR118W-A	0.772446	2.19688e-05	0.000132636	FALSE
YDR119W	VBA4	-0.164001	0.0197489	0.0554278	FALSE	-0.147003	1.22428	0.601025
YDR119W-A	COX26	-0.0612997	0.583893	0.726191	FALSE	0.245587	0.578924	0.868845
YDR120C	TRM1	-0.101456	0.131008	0.250142	FALSE	-0.115296	0.399993	0.935758
YDR121W	DPB4	-0.145585	0.0176074	0.0503803	FALSE	-0.413152	3.29006	0.0667448
YDR122W	KIN1	0.149004	0.0813395	0.172015	FALSE	0.512536	7.0516	0.000787402
YDR123C	INO2	-0.108966	0.18249	0.322083	FALSE
YDR124W	YDR124W	-0.429596	0.00484863	0.0171453	FALSE
YDR125C	ECM18	-0.219291	0.0946757	0.194373	FALSE
YDR126W	SWF1	-0.0428985	0.643313	0.771944	FALSE
YDR127W	ARO1	0.0347031	0.429755	0.591335	FALSE	0.122167	3.39635	0.0564384
YDR128W	MTC5	0.247135	0.007865	0.0258016	FALSE	-0.0369099	0.143829	0.99226
YDR129C	SAC6	0.0123119	0.813845	0.891907	FALSE	0.115208	1.56453	0.469727
YDR130C	FIN1	0.126741	0.207526	0.352374	FALSE	-0.368882	3.46395	0.0492331
YDR131C	YDR131C	0.111766	0.451592	0.611596	FALSE
YDR132C	YDR132C	0.0502607	0.709802	0.819371	FALSE	-0.367854	1.46781	0.509973
YDR133C	YDR133C	0.0526082	0.0348993	0.0880507	TRUE	-0.009206	2.71667	0.144817
YDR135C	YCF1	0.0854885	0.230689	0.380016	FALSE
YDR137W	RGP1	-0.070128	0.419666	0.583025	FALSE	0.269823	2.0279	0.307178
YDR138W	HPR1	0.153922	0.220958	0.369595	FALSE	0.0141835	1.74946	0.402571
YDR139C	RUB1	0.0323978	0.329012	0.490961	FALSE	0.0605756	1.72287	0.408929
YDR140W	MTQ2	-0.252068	0.00043585	0.00200942	FALSE	-0.166265	1.35691	0.54564
YDR141C	DOP1	-0.258652	0.000300208	0.00143577	FALSE	0.0713859	1.29311	0.575105
YDR143C	SAN1	-0.194549	0.149115	0.27504	FALSE	-0.13458	0.790008	0.781094
YDR144C	MKC7	-0.131442	0.0371092	0.0924121	FALSE	-0.31949	1.69408	0.418202
YDR145W	TAF12	-0.149304	0.0148433	0.0439055	FALSE	-0.186276	2.10617	0.28639
YDR146C	SWI5	-0.126702	0.293945	0.453404	FALSE
YDR147W	EKI1	-0.18268	0.0992221	0.201389	FALSE	-0.362549	3.26501	0.0686548
YDR148C	KGD2	0.0598317	0.214212	0.360392	FALSE	-0.0220511	0.315321	0.959456
YDR149C	YDR149C	-0.377538	0.00350071	0.0129563	FALSE
YDR150W	NUM1	-0.421594	2.21692e-05	0.000133362	FALSE	-0.0651411	0.758528	0.795748
YDR151C	CTH1	0.109764	0.294364	0.45377	FALSE	0.244885	1.16191	0.632221
YDR152W	GIR2	0.216671	0.204157	0.347963	FALSE	-0.0169141	1.71095	0.411316
YDR153C	ENT5	0.0807934	0.123099	0.23823	FALSE	0.426779	7.0668	0.000787402
YDR154C	YDR154C	0.226704	0.0140092	0.0419604	FALSE	-0.201232	8.99412	0
YDR156W	RPA14	-0.0940247	0.000978513	0.00414044	FALSE	-0.046356	1.16484	0.631558
YDR157W	YDR157W	0.31745	0.00556164	0.0192575	FALSE
YDR158W	HOM2	0.124803	2.88528e-09	2.79732e-08	FALSE	-0.0192485	0.159061	0.991013
YDR159W	SAC3	0.204903	0.0711808	0.155694	FALSE	0.168937	4.05154	0.0203998
YDR160W	SSY1	-0.603338	3.78972e-07	3.01787e-06	FALSE	-0.0577672	2.85776	0.118841
YDR161W	ACL4	0.129907	0.0408299	0.0998353	FALSE	-0.110318	1.88975	0.34914
YDR163W	CWC15	0.179979	0.00450369	0.0161009	FALSE	0.0902505	1.02119	0.687056
YDR165W	TRM82	0.23182	1.08986e-07	9.19199e-07	FALSE	0.351347	4.04901	0.0204389
YDR166C	SEC5	0.0347958	0.67858	0.796275	FALSE	0.00580238	0.24355	0.974328
YDR168W	CDC37	0.155122	0.00319503	0.011914	FALSE	0.0800124	0.883467	0.742072
YDR169C	STB3	0.075313	0.52198	0.671886	FALSE	-0.131686	0.504186	0.895236
YDR170C	SEC7	1.05173	9.19128e-86	6.74883e-84	FALSE
YDR171W	HSP42	0.254632	0.00929346	0.0298215	FALSE	0.413654	4.08125	0.020245
YDR172W	SUP35	-0.0866175	0.0139706	0.0418699	FALSE	-0.0790499	1.69119	0.419544
YDR173C	ARG82	0.487435	0.000347899	0.00163565	FALSE	0.123539	0.553746	0.876707
YDR174W	HMO1	0.0906219	4.60654e-05	0.000261369	FALSE
YDR175C	RSM24	-0.0190517	0.703894	0.815625	FALSE	-0.10203	1.86247	0.362129
YDR176W	NGG1	0.0370024	0.65451	0.779701	FALSE	0.234164	1.84076	0.36916
YDR177W	UBC1	-0.0729443	0.115284	0.226619	FALSE
YDR178W	SDH4	0.0343249	0.231632	0.381118	FALSE	0.133804	2.52512	0.181337
YDR179W-A	NVJ3	0.0727151	0.390748	0.554736	FALSE	0.0261729	1.50146	0.492499
YDR180W	SCC2	0.0260602	0.753662	0.848869	FALSE	-0.0601624	0.364767	0.945449
YDR181C	SAS4	0.073021	0.361773	0.526013	FALSE	0.15665	0.846588	0.757621
YDR182W	CDC1	0.0468328	0.448479	0.608494	FALSE	0.109329	0.787905	0.782139
YDR182W-A	YDR182W-A	-0.25839	0.130792	0.24992	FALSE
YDR183C-A	YDR183C-A	-0.051339	0.410983	0.573515	FALSE	-0.36578	1.32392	0.55889
YDR183W	PLP1	0.0229558	0.822641	0.897214	FALSE	-0.174567	0.949628	0.71488
YDR184C	ATC1	-0.0913596	0.219908	0.368333	FALSE
YDR185C	UPS3	0.252211	0.121247	0.235377	FALSE
YDR186C	SND1	0.0974523	0.376816	0.541422	FALSE
YDR188W	CCT6	-0.381388	8.85305e-18	1.54018e-16	FALSE
YDR189W	SLY1	-0.324292	7.96162e-06	5.2237e-05	FALSE	-0.168842	2.26683	0.245328
YDR190C	RVB1	0.0418075	0.251901	0.404872	FALSE	-0.0263365	0.67628	0.832195
YDR191W	HST4	0.742328	2.74524e-06	1.96657e-05	FALSE	0.410355	1.1662	0.631252
YDR192C	NUP42	0.0791793	0.499661	0.652962	FALSE
YDR194C	MSS116	0.0845636	0.0499518	0.117509	FALSE	-0.124993	1.17621	0.62703
YDR195W	REF2	-0.0625309	0.447331	0.607431	FALSE	-0.461801	1.90099	0.346226
YDR196C	CAB5	-0.0689571	0.288386	0.447873	FALSE	-0.0887411	0.508362	0.89339
YDR197W	CBS2	0.171124	0.0389473	0.0959724	FALSE	0.335335	1.26621	0.584553
YDR198C	RKM2	0.0417335	0.64759	0.774657	FALSE	-0.113679	0.591306	0.863864
YDR199W	YDR199W	0.0423755	0.697441	0.811541	FALSE
YDR200C	VPS64	0.0296872	0.781591	0.867797	FALSE	0.268941	1.54645	0.475697
YDR201W	SPC19	0.036321	0.595866	0.735697	FALSE	-0.0146538	1.89967	0.346517
YDR204W	COQ4	0.382956	1.13677e-06	8.63911e-06	FALSE	0.35636	3.50151	0.0466238
YDR205W	MSC2	-0.0841046	0.30021	0.460082	FALSE	-0.432304	2.76128	0.137532
YDR206W	EBS1	0.457174	7.4537e-05	0.000406736	FALSE	0.102411	1.33313	0.555388
YDR207C	UME6	0.796142	0.00018114	0.000912099	FALSE	-0.462871	4.47093	0.00892495
YDR208W	MSS4	0.100876	0.117995	0.230227	FALSE	0.0163171	2.34107	0.227165
YDR209C	YDR209C	-0.0367665	0.317416	0.477511	FALSE
YDR210W	YDR210W	-0.11086	7.94215e-05	0.000432445	FALSE	-0.113744	2.39884	0.214023
YDR211W	GCD6	0.0865999	0.719289	0.824285	FALSE	-0.0888907	0.682771	0.829209
YDR212W	TCP1	0.164315	3.08025e-06	2.18404e-05	FALSE	0.193587	4.02429	0.0213537
YDR214W	AHA1	0.381809	2.24846e-22	4.91084e-21	FALSE	0.393865	10.8199	0
YDR215C	YDR215C	0.411583	1.45546e-06	1.09444e-05	FALSE
YDR217C	RAD9	-0.203499	0.0653583	0.14588	FALSE	-0.0622271	0.514761	0.891267
YDR219C	MFB1	0.18227	0.110696	0.219917	FALSE	0.233607	1.48083	0.505391
YDR221W	GTB1	0.0598248	0.684124	0.800664	FALSE	-0.0111739	0.727825	0.810413
YDR222W	YDR222W	-0.10386	0.0923632	0.190645	FALSE	0.110526	0.403448	0.935011
YDR223W	CRF1	-0.478036	0.0365152	0.091343	FALSE
YDR224C	HTB1	0.0225253	0.133181	0.25342	FALSE	0.12563	1.98593	0.317788
YDR227W	SIR4	0.412784	0.000130781	0.000680906	FALSE	0.34821	3.15405	0.0810017
YDR228C	PCF11	0.0163775	0.880028	0.934492	FALSE	0.237616	2.51401	0.18436
YDR229W	IVY1	-0.095037	0.152002	0.279127	FALSE	-0.0101126	0.292609	0.963628
YDR230W	YDR230W	0.0876587	0.0928942	0.191582	FALSE
YDR231C	COX20	0.0771777	0.12227	0.237177	FALSE	0.235185	2.22001	0.256752
YDR232W	HEM1	0.228374	0.00757535	0.0250157	FALSE	0.385887	6.89922	0.000787402
YDR233C	RTN1	-0.113499	1.36503e-05	8.64923e-05	FALSE	-0.0217686	1.7464	0.403505
YDR234W	LYS4	-0.066828	0.0629564	0.141214	FALSE	-0.158702	1.99614	0.314906
YDR235W	PRP42	0.0482599	0.467039	0.625684	FALSE	0.161987	1.319	0.561059
YDR236C	FMN1	-0.090077	0.221616	0.370324	FALSE	-0.278615	4.2436	0.0162264
YDR237W	MRPL7	-0.10179	0.0227865	0.062444	FALSE	-0.0832823	0.78133	0.785403
YDR238C	SEC26	-0.0907736	0.0347062	0.0876964	FALSE	0.00702894	0.937979	0.720225
YDR239C	YDR239C	0.180542	0.256853	0.410521	FALSE	-0.140563	1.23124	0.598492
YDR240C	SNU56	-0.0921321	0.328479	0.49046	FALSE	-0.280063	2.07257	0.294506
YDR241W	BUD26	0.151959	0.396949	0.560987	FALSE
YDR242W	AMD2	0.306781	0.0186066	0.0527557	FALSE
YDR243C	PRP28	-0.0771692	0.470027	0.627926	FALSE
YDR244W	PEX5	-0.378872	3.13596e-07	2.5133e-06	FALSE
YDR245W	MNN10	0.109098	0.00491202	0.0172838	FALSE	0.0869979	2.42147	0.208506
YDR246W	TRS23	-0.00694787	0.927987	0.961494	FALSE	0.0494879	1.46325	0.51108
YDR247W	VHS1	0.104533	0.0361189	0.0905331	FALSE	0.158433	0.956632	0.711167
YDR248C	YDR248C	0.128892	0.00165196	0.00665715	FALSE	-0.000716547	0.888556	0.739473
YDR249C	YDR249C	0.0803668	0.508924	0.661241	FALSE	0.101088	1.65512	0.431487
YDR251W	PAM1	-0.24283	0.0142213	0.0424176	FALSE	-0.235245	1.88974	0.349147
YDR252W	BTT1	-0.252936	0.0911571	0.188858	FALSE
YDR253C	MET32	-0.186073	0.266858	0.421952	FALSE	-0.0547867	0.159603	0.990993
YDR254W	CHL4	0.508774	7.53732e-06	4.97144e-05	FALSE	0.641828	3.86447	0.0252836
YDR255C	RMD5	-0.107276	0.318728	0.478475	FALSE
YDR256C	CTA1	-0.252042	0.0253759	0.0681192	FALSE	-0.507999	4.20886	0.0172204
YDR257C	RKM4	-0.357899	0.0118584	0.0366471	FALSE	-0.424631	3.06274	0.0944872
YDR258C	HSP78	0.123011	0.0333617	0.084944	FALSE	0.0302298	3.39816	0.0564384
YDR259C	YAP6	-0.344377	0.00079272	0.00342688	FALSE	-0.341655	3.05026	0.0966436
YDR261C	EXG2	0.122314	0.060182	0.136465	FALSE
YDR262W	YDR262W	0.553268	7.04069e-14	9.90258e-13	FALSE	0.367011	2.26458	0.24581
YDR263C	DIN7	0.0823844	0.508983	0.661241	FALSE
YDR264C	AKR1	0.0817674	0.288625	0.448105	FALSE	0.21494	2.36299	0.223602
YDR265W	PEX10	0.0103647	0.900948	0.947637	FALSE	-0.143001	0.943805	0.717556
YDR266C	HEL2	0.241081	0.0101398	0.0319964	FALSE	0.227231	2.45513	0.200319
YDR267C	CIA1	0.0959404	0.181251	0.320349	FALSE	-0.182098	2.12447	0.281483
YDR268W	MSW1	0.173321	0.0761786	0.163576	FALSE	0.0155376	0.570013	0.872268
YDR270W	CCC2	-0.0271885	0.788154	0.872747	FALSE	0.171553	3.05517	0.0957577
YDR271C	YDR271C	0.0349658	0.745258	0.843016	FALSE
YDR272W	GLO2	0.162293	0.0343252	0.0870421	FALSE	-0.0376364	0.495601	0.899043
YDR273W	DON1	-0.271755	0.169645	0.304909	FALSE
YDR275W	BSC2	-0.606136	0.0169117	0.0487811	FALSE	0.016832	0.668023	0.836624
YDR276C	PMP3	-0.0409523	0.000339466	0.00160052	TRUE	-0.0448018	3.02281	0.0997521
YDR277C	MTH1	-0.445607	0.00907226	0.0291867	FALSE	0.402798	2.26106	0.246559
YDR278C	YDR278C	0.621557	0.00402694	0.0146442	FALSE	0.4832	2.65548	0.155172
YDR279W	RNH202	0.0502066	0.551883	0.698315	FALSE	-0.215089	1.34448	0.55087
YDR280W	RRP45	0.0311341	0.655368	0.780222	FALSE	-0.144665	0.6357	0.846812
YDR282C	MRX10	-0.929198	2.5386e-06	1.83433e-05	FALSE
YDR283C	GCN2	0.159179	0.222763	0.371371	FALSE	0.26599	1.03787	0.678485
YDR284C	DPP1	-0.0349432	0.420427	0.583757	FALSE	0.0961609	1.70382	0.413942
YDR285W	ZIP1	0.120286	0.365355	0.529024	FALSE
YDR286C	YDR286C	0.418958	2.34205e-12	2.96047e-11	FALSE	0.2439	3.31222	0.0637076
YDR288W	NSE3	0.235269	0.000379042	0.00177206	FALSE	0.133337	0.515026	0.891189
YDR289C	RTT103	0.0316641	0.714467	0.82102	FALSE	-0.193776	1.91756	0.342503
YDR291W	HRQ1	0.316232	0.00423743	0.0152541	FALSE	-0.160624	0.679034	0.830632
YDR292C	SRP101	0.380528	0.000533216	0.00240719	FALSE	-0.170906	1.98588	0.317803
YDR293C	SSD1	0.073245	0.332996	0.494844	FALSE	0.281678	2.58399	0.170345
YDR294C	DPL1	-0.164755	0.321195	0.481455	FALSE	0.135075	0.862766	0.750005
YDR295C	HDA2	0.0795608	0.410212	0.57292	FALSE	-0.259066	1.4571	0.512941
YDR296W	MHR1	0.109099	0.0101203	0.0319613	FALSE	0.407133	4.39499	0.0108588
YDR297W	SUR2	-0.144463	0.013747	0.0414235	FALSE	-0.31402	1.88198	0.35332
YDR298C	ATP5	0.0179886	0.315787	0.476065	FALSE
YDR299W	BFR2	-0.105932	0.0622247	0.139886	FALSE	0.0569858	2.54117	0.175298
YDR300C	PRO1	0.0312378	0.660154	0.782933	FALSE	0.142716	2.39818	0.214163
YDR301W	CFT1	0.0717936	0.570341	0.714788	FALSE	0.0674566	0.5565	0.875988
YDR302W	GPI11	0.121321	0.00401508	0.0146224	FALSE	0.0940678	0.642518	0.844891
YDR303C	RSC3	0.29318	0.000584363	0.00261211	FALSE	0.141704	2.29553	0.239824
YDR305C	HNT2	-0.000423536	0.995271	0.99807	FALSE	-0.258709	1.89362	0.348074
YDR306C	YDR306C	0.0326505	0.833913	0.905096	FALSE	0.00736138	1.08139	0.661928
YDR307W	PMT7	-0.0980316	0.0449332	0.107448	FALSE	0.038924	1.90037	0.346355
YDR308C	SRB7	-0.0417943	0.443516	0.604223	FALSE	0.108906	1.3767	0.538928
YDR309C	GIC2	0.252428	0.0155598	0.0455343	FALSE	0.220984	0.636658	0.846515
YDR310C	SUM1	-0.0767293	0.296926	0.456732	FALSE	-0.763529	10.1196	0
YDR311W	TFB1	0.000259491	0.998148	0.999743	FALSE	0.0800526	0.841257	0.759098
YDR312W	SSF2	0.0318746	0.694438	0.808424	FALSE	-0.277888	2.56727	0.172391
YDR313C	PIB1	-0.0422107	0.554789	0.700855	FALSE	0.0312597	2.26342	0.246055
YDR315C	IPK1	0.175192	0.0923049	0.190603	FALSE	0.457636	5.97589	0.00120482
YDR316W	OMS1	0.0371431	0.541321	0.690198	FALSE	0.158415	1.29145	0.576038
YDR317W	HIM1	0.191746	0.0669359	0.148538	FALSE
YDR318W	MCM21	0.00343911	0.970146	0.983142	FALSE	0.0789907	0.709975	0.817475
YDR319C	YFT2	0.0314954	0.730588	0.833027	FALSE	0.109799	1.54671	0.475601
YDR320C	SWA2	-0.184949	0.102518	0.206483	FALSE	-0.398706	2.27135	0.244364
YDR320C-A	DAD4	0.177968	1.61048e-13	2.17917e-12	FALSE	0.0283898	0.479296	0.907247
YDR321W	ASP1	-0.109385	0.00404781	0.0146987	FALSE	-0.187182	2.39006	0.215893
YDR322C-A	TIM11	0.153577	0.0832557	0.175325	FALSE	0.23192	22.9264	0
YDR322W	MRPL35	0.116951	0.00469327	0.0166668	FALSE	0.00910098	1.14975	0.635422
YDR324C	UTP4	0.152209	0.48199	0.63801	FALSE	-0.123685	1.71015	0.41147
YDR325W	YCG1	-0.239891	0.0120301	0.0370322	FALSE	0.0591355	0.97464	0.704465
YDR326C	YSP2	0.0468956	0.492917	0.647156	FALSE	0.260701	3.82124	0.0281918
YDR327W	YDR327W	0.104241	0.000141877	0.000734849	FALSE
YDR328C	SKP1	0.106347	0.000105885	0.000566651	FALSE	0.253319	5.74065	0.00120482
YDR329C	PEX3	0.223798	0.000180699	0.000912099	FALSE	0.126254	1.29203	0.575712
YDR330W	UBX5	-0.0544487	0.593016	0.734176	FALSE	-0.36807	2.67016	0.152269
YDR331W	GPI8	0.0210534	0.918284	0.954996	FALSE	0.0890758	2.27178	0.244274
YDR334W	SWR1	0.294885	0.000868083	0.00371727	FALSE	0.0260088	0.236578	0.975955
YDR335W	MSN5	0.0506157	0.64095	0.769892	FALSE	0.159548	0.500829	0.896719
YDR336W	MRX8	0.274437	0.202239	0.346052	FALSE	-0.116405	1.23195	0.598272
YDR337W	MRPS28	-0.195922	0.0444418	0.106477	FALSE	0.203743	1.68065	0.422342
YDR338C	YDR338C	-0.208266	0.0437278	0.105221	FALSE	-0.0688247	1.66212	0.428575
YDR339C	FCF1	0.123624	0.00626311	0.0213168	FALSE	0.0715039	0.454152	0.916991
YDR340W	YDR340W	-2.60281	4.17409e-25	1.00682e-23	FALSE
YDR341C	YDR341C	0.0326297	0.294195	0.45365	FALSE
YDR342C	HXT7	-1.11324	4.35935e-37	1.46082e-35	FALSE
YDR343C	HXT6	1.43413	1.32891e-53	6.14375e-52	FALSE	0.922688	20.6192	0
YDR345C	HXT3	-0.24525	4.18002e-24	9.8914e-23	FALSE	-0.0546255	1.35334	0.546915
YDR346C	SVF1	0.00792005	0.858198	0.921304	FALSE
YDR347W	MRP1	0.0424134	0.300783	0.460396	FALSE	0.0316315	0.317742	0.95887
YDR348C	PAL1	-0.0412792	0.614741	0.749097	FALSE	0.18965	0.812126	0.77201
YDR349C	YPS7	-0.123306	0.0306366	0.0792993	FALSE
YDR350C	ATP22	-0.30848	0.00275651	0.0104584	FALSE
YDR351W	SBE2	0.147477	0.119365	0.232354	FALSE	-0.0493518	0.646643	0.84393
YDR352W	YPQ2	0.0418936	0.483765	0.639435	FALSE	-0.246736	2.23658	0.251919
YDR353W	TRR1	-0.0230548	0.250025	0.402961	FALSE	-0.0127265	1.14786	0.635804
YDR354W	TRP4	0.124109	0.0407969	0.0998035	FALSE	0.22861	2.41392	0.210333
YDR355C	YDR355C	0.114281	0.533814	0.682543	FALSE
YDR356W	SPC110	0.176659	0.0162344	0.0471915	FALSE	0.165253	1.75525	0.400963
YDR357C	CNL1	0.064654	0.201578	0.345394	FALSE	0.071256	1.42825	0.523017
YDR358W	GGA1	-0.234907	0.0509905	0.119614	FALSE	0.516006	5.31054	0.00204604
YDR359C	EAF1	-0.0716299	0.508674	0.661241	FALSE	-0.0513187	0.830103	0.764389
YDR361C	BCP1	-0.0700655	0.111562	0.221306	FALSE	-0.158382	1.70855	0.41207
YDR362C	TFC6	0.094539	0.394276	0.558208	FALSE	-0.188005	2.87055	0.116221
YDR363W	ESC2	-0.0202644	0.904645	0.948958	FALSE
YDR363W-A	SEM1	-0.135003	0.0221955	0.0610253	FALSE	-0.0215578	0.659875	0.840176
YDR364C	CDC40	-0.0426805	0.658477	0.782109	FALSE	0.00319995	0.619782	0.853205
YDR365C	ESF1	-0.00571237	0.961178	0.977824	FALSE	-0.045607	0.308379	0.960979
YDR367W	KEI1	0.0114843	0.780724	0.867646	FALSE
YDR368W	YPR1	0.140669	1.25602e-05	8.00934e-05	FALSE
YDR369C	XRS2	-0.322779	0.00732262	0.0243259	FALSE	-0.317924	3.65039	0.0365655
YDR370C	DXO1	0.191853	0.0835399	0.175849	FALSE	0.0691021	0.825778	0.766201
YDR371W	CTS2	-0.451535	1.99877e-07	1.64956e-06	FALSE	-0.189933	2.59223	0.169037
YDR372C	VPS74	-0.207639	0.266064	0.421064	FALSE	-0.00824743	0.708587	0.818124
YDR374C	PHO92	-0.559616	0.0287427	0.0753742	FALSE	-0.622655	2.87269	0.115818
YDR374W-A	WIP1	0.309117	4.06404e-13	5.4256e-12	FALSE	0.252772	10.2991	0
YDR375C	BCS1	-0.0423812	0.499804	0.652962	FALSE	0.131914	0.696488	0.823823
YDR376W	ARH1	0.00612678	0.945214	0.968888	FALSE	-0.116758	1.82913	0.373282
YDR377W	ATP17	0.935235	4.12017e-266	1.28575e-263	FALSE	0.0847485	4.478	0.00892495
YDR378C	LSM6	0.50386	3.03864e-137	3.61236e-135	FALSE	0.145713	7.60632	0.000787402
YDR379C-A	SDH6	-0.127383	0.0168017	0.0485479	FALSE	-0.540829	29.67	0
YDR379W	RGA2	-0.328873	0.0549277	0.126793	FALSE	-0.000160185	0.803349	0.774865
YDR380W	ARO10	0.142265	0.255163	0.408735	FALSE
YDR381C-A	YDR381C-A	0.36427	0.00471244	0.016723	FALSE	0.27346	4.32599	0.0132152
YDR381W	YRA1	0.0135149	0.50496	0.658466	FALSE	0.0644286	1.78998	0.38928
YDR382W	RPP2B	-0.788108	4.07955e-27	1.04457e-25	FALSE	-0.0422769	3.74516	0.0328173
YDR383C	NKP1	-0.585042	1.94925e-21	4.14153e-20	FALSE	-0.0448513	0.709577	0.817661
YDR384C	ATO3	0.135779	0.12074	0.234482	FALSE
YDR385W	EFT2	0.410579	8.81587e-162	1.33387e-159	FALSE
YDR386W	MUS81	-0.0946099	0.334945	0.496108	FALSE	-0.00442455	0.21708	0.979801
YDR387C	CIN10	-0.148891	0.0811609	0.171984	FALSE	-0.526969	4.00977	0.0220408
YDR388W	RVS167	-0.114558	0.00272634	0.0103597	FALSE	-0.327513	9.59307	0
YDR389W	SAC7	-0.335727	1.11682e-06	8.50041e-06	FALSE	-0.491964	9.49262	0
YDR390C	UBA2	0.0618173	0.387959	0.551332	FALSE	0.281629	2.30555	0.236345
YDR391C	YDR391C	-0.247902	0.00129424	0.0053539	FALSE	-0.363998	3.22296	0.0720956
YDR392W	SPT3	-0.152647	0.0955343	0.195653	FALSE	0.219113	2.12199	0.281813
YDR393W	SHE9	0.145415	0.0787035	0.167648	FALSE	-0.00205699	0.346993	0.951249
YDR394W	RPT3	0.107413	0.0141116	0.0422116	FALSE
YDR395W	SXM1	-0.131591	0.46468	0.623361	FALSE	0.0411798	0.920927	0.729512
YDR396W	YDR396W	0.0110675	0.808825	0.888159	FALSE
YDR397C	NCB2	0.0110675	0.808825	0.888159	FALSE	-0.109495	2.7482	0.139153
YDR398W	UTP5	0.105444	0.0994123	0.201611	FALSE
YDR399W	HPT1	-0.0337252	0.134484	0.255122	FALSE	0.0222693	4.08843	0.0198413
YDR400W	URH1	-0.386267	6.41125e-06	4.27959e-05	FALSE	-0.36275	4.44543	0.00981573
YDR403W	DIT1	0.464214	0.00563385	0.0194535	FALSE
YDR404C	RPB7	0.0559565	0.135749	0.256546	FALSE	0.14802	0.959456	0.709658
YDR405W	MRP20	0.0181339	0.736397	0.836975	FALSE	-0.205583	1.48055	0.505557
YDR406W	PDR15	0.374602	0.000284095	0.00137317	FALSE	0.235706	1.73623	0.406154
YDR406W-A	YDR406W-A	0.31939	0.0456498	0.108901	FALSE
YDR408C	ADE8	-0.0459599	0.0767605	0.164491	FALSE
YDR409W	SIZ1	-0.0431416	0.720775	0.825609	FALSE
YDR410C	STE14	-0.0299165	0.674671	0.794114	FALSE
YDR411C	DFM1	-0.17869	0.00271286	0.010332	FALSE
YDR412W	RRP17	0.08396	0.224735	0.374158	FALSE	-0.213948	3.121	0.0862926
YDR413C	YDR413C	-0.0346879	0.78127	0.867646	FALSE
YDR414C	ERD1	0.120693	0.0735509	0.159531	FALSE	0.141766	1.06883	0.66603
YDR415C	YDR415C	0.041758	0.61521	0.749388	FALSE	-0.103013	1.91943	0.342049
YDR416W	SYF1	0.0104638	0.905388	0.948958	FALSE	0.028588	0.37537	0.942186
YDR419W	RAD30	0.523605	2.75709e-06	1.9694e-05	FALSE
YDR420W	HKR1	-0.0345554	0.65865	0.782109	FALSE	-0.0411099	0.673145	0.833973
YDR421W	ARO80	-0.186059	0.107826	0.214835	FALSE
YDR422C	SIP1	0.031991	0.779507	0.867203	FALSE	0.0646195	1.0136	0.689379
YDR423C	CAD1	0.275089	0.0423218	0.102879	FALSE
YDR424C	DYN2	-0.913123	1.16097e-45	4.67477e-44	FALSE	-0.238399	12.2419	0
YDR425W	SNX41	-0.141226	0.311756	0.472125	FALSE	-0.0210202	0.55787	0.875631
YDR426C	YDR426C	-0.195634	0.192372	0.333976	FALSE
YDR427W	RPN9	0.0344054	0.297584	0.457396	FALSE	-0.0764805	0.891947	0.737786
YDR428C	BNA7	0.0235545	0.528766	0.677825	FALSE	0.100699	0.704823	0.819887
YDR429C	TIF35	-0.326082	0.107555	0.214552	FALSE	0.0523682	0.925078	0.726926
YDR430C	CYM1	-0.392665	0.00423135	0.0152433	FALSE	0.0306236	0.406564	0.934338
YDR432W	NPL3	0.087966	0.0040082	0.014608	FALSE
YDR433W	YDR433W	0.0892791	0.00350821	0.0129656	FALSE	0.529323	4.77724	0.00409091
YDR434W	GPI17	0.0833163	0.232629	0.381826	FALSE	-0.236603	2.81398	0.126669
YDR435C	PPM1	-0.0666243	0.199163	0.342549	FALSE	-0.0521953	0.277189	0.968453
YDR436W	PPZ2	0.0878233	0.590825	0.732189	FALSE	0.00763652	1.18951	0.620484
YDR438W	THI74	0.120947	0.510241	0.66187	FALSE	-0.0359152	1.03044	0.682885
YDR439W	LRS4	0.132969	0.158023	0.288486	FALSE
YDR440W	DOT1	-0.115763	0.232198	0.381398	FALSE
YDR442W	YDR442W	-0.0229895	0.914623	0.953982	FALSE
YDR443C	SSN2	0.0318397	0.861535	0.922753	FALSE
YDR444W	YDR444W	-0.0878225	0.401073	0.564484	FALSE	-0.189015	2.35116	0.224895
YDR445C	YDR445C	-0.0211857	0.857554	0.921206	FALSE
YDR448W	ADA2	0.166334	0.315346	0.475687	FALSE	0.116735	0.384616	0.940153
YDR449C	UTP6	0.0785407	0.110773	0.219917	FALSE	0.0624967	0.607508	0.85765
YDR450W	RPS18A	-0.0784153	0.00708823	0.0237368	FALSE	0.090701	13.3048	0
YDR451C	YHP1	0.0391029	0.57304	0.717269	FALSE	-0.0266531	1.56418	0.46988
YDR452W	PPN1	-0.0914521	0.0245352	0.066362	FALSE	0.0219517	1.4856	0.502489
YDR453C	TSA2	0.003784	0.953404	0.973159	FALSE	-0.27014	3.22571	0.0718274
YDR454C	GUK1	-0.0860457	3.77968e-05	0.000217921	FALSE	-0.00322128	2.57439	0.1714
YDR456W	NHX1	0.0576454	0.367159	0.530908	FALSE	0.249398	1.65802	0.430361
YDR457W	TOM1	0.219542	0.131074	0.250174	FALSE	0.151341	1.06807	0.666181
YDR458C	HEH2	0.140792	0.0937555	0.192722	FALSE	-0.175878	1.56377	0.470062
YDR459C	PFA5	-0.0947433	0.307865	0.46771	FALSE	0.0428233	1.22738	0.59986
YDR460W	TFB3	0.194349	0.0172859	0.049631	FALSE	0.144025	0.847811	0.757282
YDR461C-A	YDR461C-A	0.649892	6.11791e-08	5.34034e-07	FALSE	0.906804	22.2899	0
YDR462W	MRPL28	0.0164956	0.68284	0.799741	FALSE	-0.0625049	1.20953	0.60791
YDR463W	STP1	-0.110321	0.0523471	0.122021	FALSE	-0.164624	4.55042	0.00750277
YDR464W	SPP41	0.020113	0.724224	0.82773	FALSE	-0.203587	1.00294	0.693227
YDR465C	RMT2	-0.151616	0.00215369	0.00844062	FALSE	-0.281189	2.75119	0.138666
YDR466W	PKH3	0.0727293	0.459416	0.618803	FALSE	-0.202165	1.02736	0.684318
YDR467C	YDR467C	0.077421	0.446984	0.607408	FALSE
YDR469W	SDC1	0.16117	0.00134866	0.00556057	FALSE	0.100595	1.67931	0.422657
YDR470C	UGO1	0.241139	9.88111e-05	0.000530499	FALSE	0.431824	4.6123	0.00677965
YDR471W	RPL27B	0.254557	0.0285734	0.0751087	FALSE	0.0323681	0.990823	0.69682
YDR472W	TRS31	0.110115	0.101022	0.204305	FALSE	-0.0901433	1.10519	0.649892
YDR473C	PRP3	0.18717	0.213566	0.35964	FALSE	0.0478257	1.07629	0.663815
YDR475C	JIP4	-0.168839	0.0795576	0.169107	FALSE	-0.246584	1.89289	0.348263
YDR476C	YDR476C	-0.304941	3.70707e-06	2.58512e-05	FALSE	-0.370593	6.25239	0.00120482
YDR477W	SNF1	0.0634758	0.612869	0.748022	FALSE	0.169095	2.21012	0.261001
YDR478W	SNM1	0.0131953	0.850829	0.915361	FALSE	0.0183952	2.35394	0.224693
YDR479C	PEX29	-0.0901173	0.288835	0.448152	FALSE	0.0312697	0.267227	0.970125
YDR480W	DIG2	-0.301055	0.121866	0.236486	FALSE	-0.0941004	2.45958	0.199389
YDR481C	PHO8	-0.222557	5.10877e-06	3.47049e-05	FALSE
YDR482C	CWC21	-0.0060228	0.939203	0.966297	FALSE
YDR483W	KRE2	0.1463	0.000408941	0.00189762	FALSE	-0.140478	3.65381	0.0364553
YDR484W	VPS52	0.0592048	0.577548	0.720924	FALSE	-0.114142	0.988568	0.697814
YDR485C	VPS72	0.0737942	0.584371	0.726475	FALSE
YDR486C	VPS60	-0.352221	0.0702188	0.153976	FALSE	0.0495565	0.845359	0.757962
YDR487C	RIB3	0.152769	8.95914e-07	6.91391e-06	FALSE	0.119244	2.31545	0.232403
YDR488C	PAC11	-0.212249	0.228455	0.377943	FALSE
YDR490C	PKH1	0.409548	0.00311099	0.0116418	FALSE
YDR491C	YDR491C	-0.32577	0.0633468	0.141898	FALSE
YDR492W	IZH1	0.0964339	0.310905	0.47098	FALSE	0.00159811	0.336198	0.954157
YDR493W	MZM1	-0.209915	2.10301e-05	0.000127741	FALSE	-0.300534	4.09992	0.0195056
YDR494W	RSM28	0.0795526	0.0726835	0.158061	FALSE	-0.0096959	0.659754	0.840213
YDR495C	VPS3	0.0160538	0.880782	0.934894	FALSE	-0.175713	1.04409	0.675086
YDR496C	PUF6	-0.149919	0.00673578	0.0226782	FALSE	-0.0508245	1.0831	0.661042
YDR497C	ITR1	0.099756	7.24329e-08	6.25705e-07	FALSE	-0.0473099	1.05951	0.668
YDR498C	SEC20	-0.139174	0.0500731	0.11771	FALSE
YDR499W	LCD1	-0.236863	0.0481464	0.11377	FALSE	-0.153072	0.841653	0.758988
YDR500C	RPL37B	-0.0896122	0.714077	0.82102	FALSE	-0.00512623	1.42758	0.523177
YDR501W	PLM2	-0.0255163	0.874996	0.93093	FALSE
YDR502C	SAM2	-0.0222095	0.0608458	0.137405	FALSE	-0.354924	32.4072	0
YDR504C	SPG3	0.443506	8.86377e-06	5.77765e-05	FALSE	-0.286737	2.41155	0.210889
YDR505C	PSP1	0.359939	2.59174e-05	0.000153324	FALSE	0.526782	4.74051	0.00446431
YDR507C	GIN4	-0.125499	0.373432	0.538353	FALSE
YDR508C	GNP1	0.0123252	0.917675	0.954996	FALSE
YDR510W	SMT3	0.0663902	0.0655908	0.146297	FALSE
YDR511W	SDH7	0.741803	8.75304e-62	4.64935e-60	FALSE	1.20278	42.7145	0
YDR512C	EMI1	0.780616	1.27884e-64	7.01675e-63	FALSE	0.578216	39.0916	0
YDR513W	GRX2	-0.156498	9.86523e-07	7.57801e-06	FALSE
YDR514C	YDR514C	-0.371114	1.32551e-11	1.5646e-10	FALSE
YDR515W	SLF1	0.129647	0.0554472	0.127815	FALSE
YDR516C	EMI2	0.288888	0.0178262	0.0508606	FALSE
YDR517W	GRH1	0.174705	0.00077385	0.00335609	FALSE
YDR518W	EUG1	0.228007	0.0166385	0.0481323	FALSE	-0.016008	0.927026	0.725713
YDR519W	FPR2	0.30067	5.69354e-22	1.23064e-20	FALSE	0.256517	9.06852	0
YDR520C	URC2	-0.217889	0.0469965	0.111527	FALSE	-0.434303	2.76409	0.137091
YDR521W	YDR521W	-0.239015	0.206994	0.352137	FALSE
YDR524C	AGE1	0.00569998	0.946142	0.969441	FALSE
YDR524C-A	YDR524C-A	0.336597	0.000452774	0.00208168	FALSE
YDR524C-B	YDR524C-B	-0.105079	1.18818e-46	4.86278e-45	FALSE	-0.0762304	6.77583	0.000787402
YDR525W-A	SNA2	-0.0822067	0.0105342	0.0330127	FALSE	0.304446	15.7984	0
YDR526C	YDR526C	0.0519945	0.681069	0.798405	FALSE
YDR527W	RBA50	0.0432755	0.721486	0.826044	FALSE	0.360663	1.48223	0.504535
YDR528W	HLR1	-0.109516	0.256333	0.410083	FALSE	-0.0711214	0.261343	0.970754
YDR529C	QCR7	0.0255458	0.170877	0.306242	FALSE	0.020956	0.946652	0.716247
YDR530C	APA2	0.390519	9.26969e-07	7.14252e-06	FALSE	0.590728	5.52546	0.00120482
YDR531W	CAB1	-0.142316	0.000185698	0.00092998	FALSE	-0.125232	2.25924	0.246952
YDR532C	KRE28	-0.126764	0.000467232	0.00214026	FALSE
YDR533C	HSP31	0.21388	4.94811e-12	6.1305e-11	FALSE
YDR536W	STL1	0.203682	0.411404	0.573943	FALSE
YDR538W	PAD1	0.0583949	0.54348	0.691538	FALSE
YDR539W	FDC1	0.668354	1.59593e-21	3.41995e-20	FALSE
YDR540C	IRC4	-1.5767	4.33921e-14	6.17256e-13	FALSE
YDR541C	YDR541C	0.702049	3.60975e-08	3.22423e-07	FALSE
YEL001C	IRC22	-0.297776	1.53469e-16	2.48805e-15	FALSE
YEL002C	WBP1	-0.00624699	0.867358	0.925961	FALSE	-0.105858	1.63759	0.438506
YEL003W	GIM4	-0.123077	0.0546867	0.126412	FALSE	-0.0124194	0.50159	0.896383
YEL004W	YEA4	-0.0822822	0.496193	0.650431	FALSE	-0.151582	0.610854	0.855807
YEL005C	VAB2	-0.255036	0.035165	0.0886314	FALSE	-0.157959	1.96235	0.325308
YEL006W	YEA6	0.299243	0.137014	0.258351	FALSE	0.00791543	0.884349	0.741622
YEL007W	MIT1	0.438433	2.8527e-15	4.36918e-14	FALSE	0.368866	7.39736	0.000787402
YEL009C	GCN4	0.000267275	0.996927	0.999119	FALSE	0.0109271	0.937989	0.72022
YEL011W	GLC3	-0.0121102	0.896452	0.944699	FALSE	-0.124583	1.07511	0.664187
YEL013W	VAC8	-0.0516432	0.632278	0.763624	FALSE	0.0743008	1.03301	0.681362
YEL014C	YEL014C	0.211937	0.0105656	0.0330748	FALSE
YEL015W	EDC3	0.129328	0.0285724	0.0751087	FALSE	0.315429	3.59554	0.0402325
YEL016C	NPP2	0.196433	0.0282857	0.0746501	FALSE	0.395073	1.79239	0.388375
YEL017C-A	PMP2	0.284743	0.00157895	0.00639912	FALSE	-0.145095	8.92841	0
YEL017W	GTT3	0.0570951	0.259786	0.414545	FALSE	0.125298	0.464034	0.913827
YEL018W	EAF5	0.229345	0.00200033	0.00792645	FALSE	0.497487	3.89281	0.0244565
YEL020C	PXP1	-0.107721	0.2484	0.401378	FALSE	-0.198802	1.5033	0.492174
YEL020C-B	YEL020C-B	0.208477	1.57358e-55	7.55469e-54	FALSE
YEL020W-A	TIM9	0.202395	7.32913e-63	3.93487e-61	FALSE	0.100569	6.36952	0.000787402
YEL021W	URA3	0.196833	0.265863	0.420879	FALSE	0.146112	2.35397	0.224691
YEL022W	GEA2	-0.0227691	0.828037	0.901524	FALSE	-2.51346e-06	1.42786	0.523109
YEL024W	RIP1	-0.00379948	0.860222	0.922286	FALSE	0.0411418	0.549111	0.87802
YEL025C	YEL025C	-0.174512	0.0678135	0.150085	FALSE
YEL026W	SNU13	0.00477847	0.739613	0.839318	FALSE
YEL027W	VMA3	0.0926654	2.36258e-23	5.38647e-22	FALSE	0.265174	47.6882	0
YEL028W	YEL028W	0.67328	0.000181214	0.000912099	FALSE
YEL029C	BUD16	-0.0773877	0.402399	0.565329	FALSE	0.312405	3.27123	0.0682292
YEL031W	SPF1	0.163454	0.00024045	0.00117587	FALSE	0.0897662	2.07296	0.294439
YEL032W	MCM3	0.137339	0.0934511	0.192413	FALSE	0.127126	0.55254	0.877021
YEL033W	MTC7	0.916291	2.79404e-07	2.25374e-06	FALSE	-0.463207	5.72609	0.00120482
YEL034C-A	YEL034C-A	0.0617255	0.2556	0.409174	FALSE
YEL034W	HYP2	0.0587161	0.280284	0.437604	FALSE	0.104256	4.17541	0.0181858
YEL036C	ANP1	-0.38118	4.3772e-16	6.87275e-15	FALSE	-0.37265	4.48408	0.00862798
YEL037C	RAD23	0.234913	2.81748e-10	3.01235e-09	FALSE	0.218131	2.2099	0.261081
YEL038W	UTR4	0.028508	0.650754	0.777106	FALSE	-0.0792604	0.451764	0.917719
YEL039C	CYC7	-1.13898	1.21567e-16	1.99666e-15	FALSE	0.0912507	2.51399	0.184368
YEL040W	UTR2	-1.39426	8.91402e-150	1.27165e-147	FALSE	-1.7529	101.788	0
YEL041W	YEF1	0.405733	0.0330376	0.0843768	FALSE
YEL042W	GDA1	-0.123419	0.0368291	0.0919438	FALSE	-0.0899183	1.88085	0.353932
YEL043W	YEL043W	0.0136949	0.897475	0.944838	FALSE	0.0674599	0.217588	0.979738
YEL044W	IES6	0.355669	1.13791e-05	7.29342e-05	FALSE	0.243801	7.37899	0.000787402
YEL046C	GLY1	-0.18475	1.9139e-05	0.000117253	FALSE	-0.228637	4.82495	0.00379147
YEL047C	FRD1	0.00890902	0.892305	0.941124	FALSE	0.0365912	1.14399	0.636585
YEL050C	RML2	-0.072715	0.605361	0.744475	FALSE	0.081651	0.939606	0.719484
YEL052W	AFG1	0.368417	1.47981e-05	9.28225e-05	FALSE	0.353772	2.85032	0.119993
YEL053C	MAK10	0.0114886	0.913181	0.953075	FALSE	-0.102713	0.612109	0.855441
YEL053W-A	YEL053W-A	-0.0847949	0.243636	0.395344	FALSE
YEL054C	RPL12A	-0.0847949	0.243636	0.395344	FALSE	-0.0115215	1.08077	0.662251
YEL055C	POL5	-0.106009	0.0135954	0.0410976	FALSE	-0.27054	3.65224	0.0365059
YEL056W	HAT2	-0.200165	0.000323551	0.00153418	FALSE	-0.310108	3.06619	0.0939845
YEL057C	SDD1	0.288267	0.00049641	0.00225325	FALSE	1.07596	9.12088	0
YEL058W	PCM1	-0.0467584	0.28736	0.446697	FALSE	0.154646	3.24244	0.0709677
YEL059C-A	SOM1	0.256511	0.0085886	0.0278099	FALSE	0.377433	2.26741	0.245206
YEL060C	PRB1	-0.264074	0.133712	0.25412	FALSE	0.00376273	0.832516	0.763184
YEL061C	CIN8	0.121943	0.207557	0.352374	FALSE	0.242231	1.40951	0.528973
YEL062W	NPR2	-0.0864044	0.391083	0.554896	FALSE	-0.123437	0.949956	0.714729
YEL063C	CAN1	-0.229936	5.28898e-10	5.55955e-09	FALSE	-0.664268	6.55629	0.000787402
YEL064C	AVT2	0.0577352	0.722075	0.82634	FALSE
YEL066W	HPA3	0.00832911	0.835236	0.905413	FALSE	0.335097	5.28831	0.00204604
YEL068C	YEL068C	-0.528109	1.13889e-09	1.15344e-08	FALSE	-0.0897817	0.466021	0.913146
YEL071W	DLD3	0.0342595	0.091805	0.189806	FALSE	0.0262248	0.5792	0.868739
YEL072W	RMD6	0.341618	3.46618e-07	2.7735e-06	FALSE	0.426934	3.72085	0.0338071
YEL077C	YEL077C	2.67176	2.22394e-49	9.65576e-48	FALSE
YEL077W-A	YEL077W-A	2.53053	2.04174e-11	2.37632e-10	FALSE
YER001W	MNN1	0.152275	0.000754469	0.00327571	FALSE	0.167483	2.24774	0.249282
YER002W	NOP16	0.0577906	0.0969153	0.197832	FALSE	0.118672	2.07833	0.293518
YER003C	PMI40	-0.243978	1.33778e-10	1.47777e-09	FALSE	-0.200084	3.34881	0.0600111
YER004W	FMP52	0.348757	7.83233e-20	1.51577e-18	TRUE	0.46506	13.234	0
YER005W	YND1	0.190924	0.0514972	0.120434	FALSE	-0.0540676	1.03021	0.683018
YER006W	NUG1	0.097251	0.0277612	0.0734949	FALSE	-0.0355725	1.33232	0.555655
YER007C-A	TMA20	-0.033211	0.417445	0.580262	FALSE	0.0339657	0.974642	0.704464
YER007W	PAC2	-0.150636	0.0857531	0.179901	FALSE
YER008C	SEC3	0.182853	0.146761	0.2717	FALSE	0.0219383	0.925046	0.726946
YER009W	NTF2	0.23305	5.32572e-05	0.00029711	FALSE	0.177977	16.2286	0
YER013W	PRP22	0.130951	0.267888	0.423029	FALSE	0.162034	1.32207	0.55964
YER014C-A	BUD25	-0.256029	0.223562	0.372454	FALSE
YER014W	HEM14	-0.183231	0.338553	0.500295	FALSE
YER015W	FAA2	0.172808	0.217398	0.364986	FALSE	-0.112149	1.66472	0.427324
YER018C	SPC25	0.073019	0.299752	0.459521	FALSE	-0.223534	1.32119	0.559994
YER019W	ISC1	0.234962	0.000186877	0.000934949	FALSE	0.502779	5.123	0.00296296
YER020W	GPA2	-0.0854325	0.203967	0.347963	FALSE	0.0495781	1.24476	0.593786
YER021W	RPN3	0.00560837	0.884046	0.936965	FALSE	0.0755784	1.10311	0.650319
YER022W	SRB4	-0.0222864	0.792864	0.876002	FALSE	0.2096	1.089	0.657998
YER023C-A	YER023C-A	-0.150021	1.45712e-11	1.71186e-10	FALSE
YER023W	PRO3	-0.0837711	4.94275e-05	0.000277918	FALSE
YER024W	YAT2	0.58138	1.97282e-14	2.84691e-13	FALSE	0.628555	11.7392	0
YER025W	GCD11	-0.0723207	0.741989	0.841224	FALSE	-0.124007	4.30371	0.0141861
YER026C	CHO1	-0.0899305	1.74901e-05	0.000108213	FALSE
YER027C	GAL83	0.101384	0.153336	0.280956	FALSE
YER028C	MIG3	-0.0157695	0.867816	0.926252	FALSE
YER029C	SMB1	-0.0194913	0.811855	0.890508	FALSE	0.296602	2.82526	0.125038
YER030W	CHZ1	-0.229607	7.96886e-08	6.84828e-07	FALSE	-0.197217	2.69931	0.147433
YER031C	YPT31	0.239893	5.66319e-13	7.46076e-12	FALSE	0.714325	25.242	0
YER032W	FIR1	0.315918	0.000682106	0.00299276	FALSE	-0.0952045	0.933353	0.722332
YER033C	ZRG8	-0.0265181	0.847331	0.912384	FALSE	0.443052	2.50476	0.187074
YER034W	YER034W	0.26988	0.000267392	0.00129872	FALSE	0.388663	2.12027	0.282041
YER035W	EDC2	0.473164	6.25176e-18	1.10692e-16	FALSE	0.474533	8.29823	0
YER036C	ARB1	-0.101477	0.0802639	0.17039	FALSE	0.0983441	2.16666	0.27104
YER038C	KRE29	0.0273124	0.903397	0.948958	FALSE
YER038W-A	FMP49	-0.471967	1.31108e-06	9.90349e-06	FALSE
YER039C	HVG1	-0.471967	1.31108e-06	9.90349e-06	FALSE	-0.557565	5.11544	0.00296296
YER040W	GLN3	0.0563211	0.517947	0.668419	FALSE	-0.231159	2.3838	0.21835
YER041W	YEN1	-0.089917	0.54899	0.696082	FALSE
YER042W	MXR1	-0.184577	5.65973e-06	3.81879e-05	FALSE	-0.143102	1.67014	0.424753
YER043C	SAH1	-0.0169778	0.117677	0.229704	FALSE	-0.0663714	6.30294	0.00120482
YER045C	ACA1	-0.473306	8.22462e-05	0.000444914	FALSE
YER046W	SPO73	-0.165928	0.0211489	0.0586973	FALSE	-0.160718	2.94117	0.107896
YER046W-A	YER046W-A	-0.160251	0.281107	0.438614	FALSE
YER047C	SAP1	-0.219005	0.12447	0.240046	FALSE	-0.260124	1.99552	0.315071
YER048C	CAJ1	-0.0204362	0.810165	0.889241	FALSE
YER048W-A	ISD11	0.120987	0.0208564	0.0580146	FALSE	0.105619	3.74996	0.0328173
YER049W	TPA1	0.00552146	0.922701	0.958005	FALSE	0.0282336	0.224507	0.978646
YER050C	RSM18	0.0645466	0.0476229	0.112693	FALSE	0.108665	1.51057	0.490928
YER051W	JHD1	-0.0496178	0.726405	0.829583	FALSE
YER052C	HOM3	0.100553	0.00202325	0.00800482	FALSE	-0.101659	1.22024	0.602543
YER053C	PIC2	0.308501	0.000672762	0.00295956	FALSE	0.418859	4.19781	0.0174741
YER053C-A	YER053C-A	-0.201735	1.27827e-11	1.51601e-10	TRUE	0.479975	52.6524	0
YER054C	GIP2	-0.472195	0.0466455	0.110852	FALSE
YER055C	HIS1	0.0929807	1.20716e-11	1.44195e-10	FALSE
YER056C	FCY2	0.00754908	0.803456	0.884598	FALSE
YER056C-A	RPL34A	0.0836945	5.45151e-12	6.72083e-11	FALSE	0.129706	8.40765	0
YER057C	HMF1	0.123205	0.167278	0.302579	FALSE	0.0523569	0.868115	0.748412
YER058W	PET117	0.120891	0.00810392	0.0264809	FALSE	0.147635	1.22513	0.600705
YER059W	PCL6	0.0778556	0.268606	0.424012	FALSE	-0.234626	1.60582	0.451858
YER060W	FCY21	-0.783186	7.11552e-17	1.17642e-15	FALSE	-0.953645	6.08059	0.00120482
YER060W-A	FCY22	-0.117783	0.627825	0.760672	FALSE
YER061C	CEM1	0.335448	0.00367619	0.0135064	FALSE	-0.00377322	0.649927	0.843166
YER062C	GPP2	0.0167174	0.714208	0.82102	FALSE	0.257484	3.01153	0.100214
YER063W	THO1	-0.211393	1.19022e-13	1.64164e-12	FALSE	-0.17573	2.77131	0.135832
YER064C	VHR2	-0.370882	0.0285813	0.0751087	FALSE
YER065C	ICL1	0.156087	0.334155	0.495476	FALSE	-0.0405684	0.559189	0.875287
YER066W	RRT13	-0.31178	0.1293	0.247716	FALSE
YER067C-A	YER067C-A	0.08584	0.341078	0.502657	FALSE
YER067W	RGI1	0.0868096	0.319256	0.47898	FALSE	-0.00139157	0.94552	0.716768
YER068W	MOT2	0.0488238	0.626081	0.759665	FALSE	0.0709356	0.979461	0.702668
YER069W	ARG5,6	0.102278	0.318696	0.478475	FALSE	-0.0323763	0.194407	0.984639
YER070W	RNR1	-0.317697	0.165643	0.300639	FALSE	0.123552	2.14793	0.275767
YER071C	TDA2	-0.061585	0.207503	0.352374	FALSE	-0.203532	3.00719	0.100327
YER072W	VTC1	0.321283	5.13746e-21	1.04274e-19	FALSE
YER074W-A	YOS1	0.0385491	0.427529	0.589946	FALSE	-0.299065	4.20918	0.0172136
YER075C	PTP3	0.11887	0.43524	0.596409	FALSE	-0.0665634	0.405663	0.934532
YER076C	YER076C	1.09715	3.03594e-17	5.13845e-16	FALSE
YER076W-A	YER076W-A	1.32651	8.79475e-16	1.37226e-14	FALSE
YER077C	MRX1	0.221968	0.0601834	0.136465	FALSE	0.30405	1.12214	0.64458
YER078C	ICP55	0.0501899	0.708726	0.819102	FALSE	0.0532303	1.06159	0.667475
YER079C-A	YER079C-A	0.426699	0.0317082	0.0815237	FALSE
YER080W	AIM9	-0.0798377	0.262982	0.417967	FALSE	-0.385265	2.74871	0.13905
YER081W	SER3	0.13283	7.84603e-06	5.15464e-05	FALSE	0.180365	4.87067	0.00379147
YER082C	UTP7	0.0915926	0.00916665	0.0294524	FALSE
YER083C	GET2	0.150354	0.000149884	0.000771515	FALSE
YER084W	YER084W	0.255281	0.15778	0.288243	FALSE
YER086W	ILV1	0.00107012	0.986667	0.993632	FALSE
YER087C-A	YER087C-A	-0.076103	0.486235	0.641758	FALSE
YER087C-B	SBH1	-0.104641	1.77758e-06	1.32668e-05	FALSE
YER087W	AIM10	-0.0507397	0.638248	0.767711	FALSE
YER088C	DOT6	0.0286256	0.70552	0.816944	FALSE
YER088C-A	YER088C-A	0.329734	0.00381169	0.0139427	FALSE
YER089C	PTC2	0.0230021	0.779666	0.867203	FALSE	0.0479051	0.311976	0.960266
YER090W	TRP2	-0.146759	0.000476167	0.00216925	FALSE	-0.257527	4.22207	0.0170543
YER091C	MET6	-0.123961	0.0985021	0.200253	FALSE	-0.125043	9.80922	0
YER092W	IES5	-0.141107	0.000593318	0.00264976	FALSE	-0.39292	7.3157	0.000787402
YER093C	TSC11	0.395195	8.58207e-13	1.12468e-11	FALSE
YER093C-A	AIM11	-0.0673715	0.263472	0.418422	FALSE
YER094C	PUP3	0.0241202	0.36284	0.526493	FALSE	0.033564	4.14997	0.0185803
YER098W	UBP9	0.346203	0.0421083	0.10246	FALSE
YER099C	PRS2	0.0370065	0.606215	0.744608	FALSE	0.32279	3.21119	0.0727264
YER100W	UBC6	0.123426	0.0061158	0.020858	FALSE	0.0172738	1.07744	0.663454
YER101C	AST2	-0.17744	0.0870496	0.182009	FALSE	-0.370006	2.01947	0.309288
YER102W	RPS8B	-0.332886	0.00033325	0.0015727	FALSE	-0.10785	11.2677	0
YER103W	SSA4	0.104652	0.304311	0.464089	FALSE	0.0311349	0.798746	0.776499
YER105C	NUP157	-0.145456	0.10161	0.204985	FALSE	-0.0173571	0.381742	0.940387
YER107C	GLE2	0.0210286	0.712433	0.82019	FALSE	-0.275029	3.47205	0.0490141
YER110C	KAP123	-0.342518	1.1313e-07	9.50939e-07	FALSE
YER111C	SWI4	0.548697	1.83467e-10	1.99656e-09	TRUE	0.0328772	1.02118	0.687062
YER112W	LSM4	0.041336	0.265113	0.420225	FALSE	0.156211	1.34434	0.55094
YER113C	TMN3	-0.000354949	0.996806	0.999119	FALSE	0.149102	0.619718	0.853223
YER114C	BOI2	-0.0761273	0.516889	0.667635	FALSE	-0.0592825	0.441512	0.92203
YER115C	SPR6	0.731816	5.92013e-19	1.10709e-17	FALSE	0.620625	4.52226	0.00753138
YER117W	RPL23B	0.172512	2.87798e-92	2.3177e-90	FALSE	0.218073	41.4581	0
YER118C	SHO1	-0.0478066	0.448087	0.608289	FALSE	-0.0583573	1.39783	0.531438
YER119C	AVT6	-0.099378	0.241419	0.393024	FALSE
YER119C-A	YER119C-A	-0.691207	0.00502597	0.017635	FALSE
YER120W	SCS2	0.0726576	0.331325	0.493086	FALSE	-0.0869545	1.76866	0.396736
YER121W	YER121W	0.246156	0.0369537	0.0921217	FALSE	0.140271	1.51848	0.490092
YER122C	GLO3	-0.0974561	0.039475	0.0969975	FALSE	-0.272918	6.8936	0.000787402
YER123W	YCK3	-0.208497	0.0148882	0.0439602	FALSE	-0.473342	4.10194	0.0194051
YER124C	DSE1	0.485348	1.27589e-13	1.75014e-12	TRUE	0.196733	1.41529	0.526811
YER125W	RSP5	0.0949529	0.0687825	0.151893	FALSE	0.0520814	1.03743	0.678743
YER126C	NSA2	-0.0808401	0.382295	0.546463	FALSE	-0.267318	4.55824	0.00697184
YER127W	LCP5	-0.155017	0.00507059	0.0177788	FALSE	-0.10658	1.20205	0.612841
YER129W	SAK1	-0.136768	0.0720943	0.157054	FALSE
YER130C	COM2	-0.168013	0.0172017	0.0494746	FALSE	0.216154	1.22739	0.599854
YER132C	PMD1	0.0755549	0.371478	0.536686	FALSE
YER133W	GLC7	0.143867	7.03838e-05	0.000384914	FALSE	0.0710429	0.986768	0.698792
YER133W-A	YER133W-A	0.685692	2.98163e-21	6.20303e-20	FALSE
YER134C	YER134C	0.67124	5.011e-26	1.23251e-24	FALSE	0.578222	6.0474	0.00120482
YER135C	YER135C	0.216223	0.386186	0.54998	FALSE
YER136W	GDI1	0.0348567	0.552675	0.69914	FALSE	0.219399	5.92664	0.00120482
YER137C	YER137C	-0.0383644	0.635537	0.765671	FALSE	0.0302881	1.73905	0.405631
YER137W-A	YER137W-A	0.108162	0.482515	0.638537	FALSE
YER140W	EMP65	-0.437214	0.057762	0.132296	FALSE	-0.57062	3.33329	0.0608416
YER141W	COX15	-0.0271806	0.669131	0.790388	FALSE	0.406851	2.97264	0.10558
YER142C	MAG1	0.197084	0.0282779	0.0746501	FALSE	-0.0930644	2.1583	0.273093
YER143W	DDI1	0.0521482	0.406265	0.568541	FALSE	-0.10203	1.1178	0.645788
YER145C	FTR1	-0.352177	3.32247e-19	6.28375e-18	FALSE
YER145C-A	YER145C-A	0.0846994	0.0118169	0.0365561	FALSE
YER146W	LSM5	0.090539	0.00700237	0.0235123	FALSE
YER147C	SCC4	-0.0744911	0.492777	0.647142	FALSE
YER148W	SPT15	-0.00092309	0.981843	0.990375	FALSE	0.0591285	0.905184	0.73296
YER150W	SPI1	1.05113	5.63496e-21	1.13449e-19	FALSE	0.808563	7.92557	0
YER151C	UBP3	0.275744	0.00345494	0.0128066	FALSE	0.405049	1.25075	0.59125
YER152C	YER152C	-0.468743	6.29537e-24	1.46882e-22	FALSE	-0.546243	8.75771	0
YER154W	OXA1	0.0689881	0.20929	0.354111	FALSE
YER155C	BEM2	0.0492715	0.398293	0.561933	FALSE
YER156C	YER156C	-0.108446	6.07228e-05	0.000334276	FALSE
YER157W	COG3	-0.333023	0.000427248	0.0019734	FALSE
YER158C	YER158C	0.0427343	0.719198	0.824285	FALSE	-0.00618283	0.759038	0.795522
YER158W-A	YER158W-A	-0.0221689	0.597879	0.737144	FALSE
YER159C	BUR6	-0.0140824	0.735896	0.836786	FALSE	-0.0403455	1.46432	0.51082
YER161C	SPT2	-0.000274834	0.997316	0.999119	FALSE	0.320262	1.79448	0.38759
YER162C	RAD4	-0.159192	0.228599	0.377945	FALSE	-0.164145	1.98744	0.317329
YER163C	GCG1	-0.136679	0.0111922	0.0347096	FALSE	-0.0693382	2.35608	0.224538
YER164W	CHD1	0.0029531	0.977093	0.988176	FALSE	0.233171	1.54101	0.477714
YER165W	PAB1	0.0707235	0.005585	0.019325	FALSE	-0.0812972	0.817719	0.769596
YER166W	DNF1	0.5573	0.00046979	0.00214804	FALSE	-0.140848	1.73923	0.405598
YER167W	BCK2	-0.0323957	0.67113	0.792187	FALSE	0.0223884	1.77996	0.392076
YER168C	CCA1	-0.0492384	0.510139	0.66187	FALSE	-0.0947918	1.3577	0.545356
YER169W	RPH1	0.308154	0.00316704	0.0118272	FALSE	0.365443	4.28486	0.0146295
YER170W	ADK2	-0.105241	0.491492	0.646472	FALSE	-0.188887	1.06803	0.66619
YER171W	RAD3	0.0315284	0.700436	0.813015	FALSE	0.147568	0.336723	0.954065
YER172C	BRR2	-0.0939588	0.268721	0.424059	FALSE	-0.151243	1.42707	0.523297
YER173W	RAD24	0.241402	0.00171454	0.00688715	FALSE	-0.168459	0.425058	0.93058
YER174C	GRX4	0.324425	1.94815e-12	2.48775e-11	FALSE	0.0409854	1.10882	0.649145
YER175C	TMT1	-1.00444	9.8333e-09	9.10903e-08	FALSE	-1.22507	17.2627	0
YER176W	ECM32	0.155674	0.0607183	0.13719	FALSE	0.481094	4.05018	0.0204134
YER177W	BMH1	0.177555	2.14937e-52	9.8457e-51	FALSE
YER178W	PDA1	0.112338	6.06475e-05	0.000334231	FALSE
YER179W	DMC1	-0.165376	0.431326	0.593118	FALSE
YER180C	ISC10	0.133307	0.202768	0.346601	FALSE	0.0673526	1.44412	0.517542
YER182W	FMP10	0.253219	7.74092e-06	5.09228e-05	FALSE	0.0803929	1.25403	0.589744
YER183C	FAU1	-0.216346	0.000172108	0.000874196	FALSE	0.13008	0.525425	0.887166
YER186C	YER186C	-0.999408	6.05038e-24	1.41829e-22	FALSE
YER187W	YER187W	-2.99296	4.8621e-283	1.73403e-280	FALSE
YER188W	YER188W	-0.0784716	0.692136	0.806308	FALSE
YFL001W	DEG1	-0.130219	0.168348	0.303266	FALSE	-0.0149793	0.546444	0.879029
YFL002C	SPB4	0.0424528	0.565476	0.710295	FALSE	-0.0537031	2.15749	0.273307
YFL004W	VTC2	0.0643591	0.178428	0.316255	FALSE
YFL005W	SEC4	0.104048	0.000189471	0.000946976	FALSE	0.0553732	0.667121	0.837019
YFL007W	BLM10	0.0910144	0.365188	0.529024	FALSE	0.349258	3.68416	0.0350453
YFL008W	SMC1	0.0738026	0.371768	0.53695	FALSE	0.0728109	1.35815	0.545196
YFL010C	WWM1	-0.0911157	0.0101507	0.0319964	FALSE	-0.187195	1.35081	0.547823
YFL010W-A	AUA1	-0.102831	0.00437274	0.0157073	FALSE
YFL013C	IES1	0.133029	0.197747	0.340819	FALSE	-0.284111	2.64298	0.157883
YFL013W-A	YFL013W-A	0.0165443	0.877196	0.932476	FALSE
YFL014W	HSP12	-1.81279	1.48788e-206	2.9716e-204	FALSE	-0.168511	2.75248	0.138529
YFL016C	MDJ1	0.150095	0.0225072	0.0617464	FALSE	0.0993111	1.94593	0.331002
YFL017C	GNA1	0.133083	0.000982024	0.00414826	FALSE	-0.0934938	0.725758	0.811136
YFL017W-A	SMX2	0.0180046	0.658832	0.782109	FALSE	0.140632	1.69924	0.415804
YFL018C	LPD1	0.689645	2.76213e-13	3.71733e-12	FALSE	0.0274451	0.475371	0.909162
YFL021W	GAT1	0.132438	0.366868	0.530641	FALSE	0.103221	0.744311	0.802382
YFL022C	FRS2	-0.0876542	0.606993	0.745197	FALSE	-0.00149514	0.128912	0.993875
YFL023W	BUD27	0.147639	0.0754452	0.16223	FALSE	0.166658	0.74801	0.80052
YFL024C	EPL1	-0.567221	1.72559e-05	0.000106897	FALSE
YFL025C	BST1	-0.0313883	0.775205	0.863859	FALSE	-0.0792836	0.684634	0.82862
YFL026W	STE2	-0.0487084	0.787138	0.872404	FALSE	-0.025716	0.598496	0.862695
YFL027C	GYP8	0.164573	0.275791	0.432482	FALSE
YFL028C	CAF16	0.00909012	0.807611	0.887323	FALSE
YFL029C	CAK1	0.13066	0.0668441	0.148467	FALSE	0.0309487	1.16806	0.63083
YFL030W	AGX1	0.138087	0.0275191	0.0730089	FALSE	-0.200205	1.40177	0.530431
YFL031C-A	YFL031C-A	0.0494052	0.621764	0.755528	FALSE
YFL031W	HAC1	-0.0302778	0.0243347	0.0659626	FALSE	-0.238329	32.3848	0
YFL033C	RIM15	-0.0487086	0.562187	0.706697	FALSE	-0.274951	2.54371	0.175153
YFL034C-A	RPL22B	0.0626004	0.00218853	0.00856373	FALSE	0.0222918	0.516347	0.890801
YFL034C-B	MOB2	-0.192281	0.00410802	0.0148849	FALSE	0.0324093	0.63971	0.845568
YFL034W	MIL1	-0.194995	0.0579573	0.13263	FALSE	0.142212	0.906137	0.732795
YFL036W	RPO41	-0.194401	0.0520557	0.121512	FALSE	0.0610833	2.52364	0.181666
YFL037W	TUB2	0.00042199	0.98806	0.994634	FALSE	-0.0285326	1.97588	0.321111
YFL039C	ACT1	-0.0837408	0.010858	0.0338625	FALSE	3.93326e-05	0.176109	0.988878
YFL040W	YFL040W	-0.176321	0.00282045	0.0106605	FALSE
YFL041W	FET5	0.140047	0.0402737	0.0987654	FALSE	0.220963	2.70426	0.146817
YFL041W-A	YFL041W-A	-0.0359037	0.825416	0.899455	FALSE
YFL042C	LAM5	-0.0191593	0.843912	0.910273	FALSE	-0.327674	1.71924	0.409728
YFL044C	OTU1	0.0370291	0.512301	0.663676	FALSE	0.136328	2.73894	0.141028
YFL045C	SEC53	0.0276404	0.420962	0.584337	FALSE	0.0885086	4.59716	0.00685225
YFL046W	FMP32	0.0395941	0.279002	0.435875	FALSE	0.0534532	2.12013	0.282059
YFL047W	RGD2	-0.152618	0.105142	0.210748	FALSE	0.220975	2.78276	0.132879
YFL048C	EMP47	0.246315	0.0531766	0.123723	FALSE	-0.14428	1.97597	0.321077
YFL049W	SWP82	0.314977	0.000640747	0.00282869	FALSE	0.613854	7.39761	0.000787402
YFL050C	ALR2	0.869636	1.0296e-20	2.0595e-19	FALSE
YFL053W	DAK2	-0.954807	1.16027e-07	9.72019e-07	FALSE
YFL054C	AQY3	-0.160599	0.226511	0.376112	FALSE
YFL058W	THI5	-2.04876	3.82569e-28	1.01605e-26	FALSE
YFL059W	SNZ3	-2.73207	0	0	TRUE	-2.84448	346.32	0
YFL062W	COS4	4.97882	0	0	FALSE	0.243848	2.27445	0.243703
YFR001W	LOC1	0.0440191	0.360043	0.524109	FALSE	0.0239758	1.19427	0.617667
YFR002W	NIC96	-0.181488	0.0860932	0.180312	FALSE
YFR003C	YPI1	-0.0447923	0.330539	0.492395	FALSE	-0.00537782	0.0737393	0.997923
YFR004W	RPN11	0.131248	0.0749112	0.161499	FALSE	0.010524	0.68023	0.830012
YFR005C	SAD1	-0.0359785	0.71426	0.82102	FALSE	-0.209311	0.662005	0.83926
YFR007W	YFH7	-0.0343292	0.760124	0.853488	FALSE
YFR009W	GCN20	0.248896	0.205728	0.350101	FALSE
YFR010W	UBP6	-0.0100448	0.739636	0.839318	FALSE	-0.0493603	0.345792	0.951635
YFR011C	MIC19	-0.0366275	0.236729	0.386903	FALSE	-0.0393278	1.19056	0.619913
YFR013W	IOC3	0.126154	0.333011	0.494844	FALSE	0.112737	1.54748	0.475315
YFR014C	CMK1	0.113827	0.0534291	0.124022	FALSE	0.202709	1.18374	0.623213
YFR015C	GSY1	-0.372903	0.0619962	0.139561	FALSE	-0.1686	0.737743	0.805703
YFR016C	YFR016C	-0.0838214	0.10552	0.211337	FALSE	-0.279483	3.27998	0.0682292
YFR017C	IGD1	-0.42158	2.10869e-05	0.00012793	FALSE	-0.32235	1.53054	0.482971
YFR018C	YFR018C	-0.179369	0.138239	0.259874	FALSE	0.132032	0.636462	0.846576
YFR019W	FAB1	0.213972	0.353629	0.515977	FALSE	0.0510684	1.06959	0.665877
YFR020W	CSS2	-0.89006	4.3366e-16	6.83049e-15	FALSE
YFR021W	ATG18	0.0258769	0.821446	0.896314	FALSE	-0.00570618	0.908935	0.732312
YFR022W	ROG3	0.31667	0.0854185	0.17935	FALSE
YFR024C-A	LSB3	-0.0682627	0.188245	0.329676	FALSE	-0.0749134	1.90015	0.346402
YFR025C	HIS2	-0.267067	3.39176e-06	2.37852e-05	FALSE	-0.462683	6.19054	0.00120482
YFR026C	ULI1	-2.71841	2.44111e-10	2.63249e-09	FALSE
YFR027W	ECO1	0.0997614	0.50874	0.661241	FALSE	-0.182796	2.25627	0.247596
YFR028C	CDC14	0.250878	0.0144633	0.0430364	FALSE	0.355462	2.38378	0.218356
YFR029W	PTR3	-0.0189661	0.852413	0.91651	FALSE	0.0509126	1.39786	0.531429
YFR030W	MET10	-0.258535	0.0218444	0.0603258	FALSE	0.414132	9.58939	0
YFR031C	SMC2	0.11063	0.299639	0.459489	FALSE	0.182399	2.47716	0.192936
YFR031C-A	RPL2A	0.0300035	0.0336267	0.0855315	FALSE	0.0487805	1.43495	0.520784
YFR032C-A	RPL29	-0.0103097	0.115344	0.226648	TRUE	-0.203935	16.6884	0
YFR033C	QCR6	0.087821	0.0545087	0.126126	FALSE	0.0153353	2.17545	0.26958
YFR034C	PHO4	-0.0573427	0.600697	0.740198	FALSE
YFR038W	IRC5	0.0968007	0.129565	0.248052	FALSE	-0.116408	0.832659	0.763112
YFR039C	OSW7	-0.0684025	0.384419	0.548401	FALSE	0.0816572	0.315246	0.959474
YFR040W	SAP155	-0.0987583	0.312744	0.473113	FALSE	0.210283	1.33208	0.555736
YFR041C	ERJ5	-0.032194	0.6239	0.757571	FALSE	0.0102984	0.736149	0.806516
YFR042W	KEG1	0.0644355	0.228004	0.377587	FALSE	0.235767	4.02407	0.0213815
YFR043C	IRC6	-0.0862837	0.296395	0.456255	FALSE	-0.00031431	0.737035	0.806064
YFR044C	DUG1	0.167719	0.232163	0.381398	FALSE	0.0299758	0.388564	0.93983
YFR045W	YFR045W	-0.00912723	0.921735	0.957599	FALSE	0.374292	2.24396	0.249819
YFR046C	CNN1	0.0386589	0.653943	0.779415	FALSE
YFR047C	BNA6	0.0125492	0.739589	0.839318	FALSE	0.00106765	3.1787	0.076844
YFR048W	RMD8	-0.25453	0.112552	0.222591	FALSE	0.136382	0.990625	0.696872
YFR049W	YMR31	-0.0798998	0.0220109	0.0606514	FALSE	-0.240832	5.17828	0.00248756
YFR050C	PRE4	-0.0237289	0.562056	0.706697	FALSE	0.132629	2.14176	0.277244
YFR051C	RET2	0.0112598	0.80419	0.885017	FALSE	-0.155616	2.44409	0.202304
YFR052C-A	YFR052C-A	-0.232244	0.000197793	0.000985608	FALSE	0.00456777	0.893681	0.736939
YFR052W	RPN12	0.128083	4.40508e-05	0.000251654	FALSE
YFR053C	HXK1	-0.234488	0.000169254	0.000862334	FALSE	-0.0540363	0.990826	0.696819
YFR055W	IRC7	-0.705959	3.46281e-21	7.14455e-20	FALSE
YGL001C	ERG26	0.0671394	0.682144	0.79933	FALSE	-0.173926	2.55479	0.174294
YGL002W	ERP6	-0.029504	0.657741	0.781743	FALSE	-0.0155015	0.964551	0.707924
YGL003C	CDH1	-0.131363	0.250246	0.403188	FALSE	-0.130879	2.31298	0.233164
YGL004C	RPN14	0.071005	0.369106	0.533415	FALSE	0.117482	1.21461	0.605309
YGL005C	COG7	-0.106132	0.0983753	0.200158	FALSE	0.11146	0.383165	0.940271
YGL006W	PMC1	-0.430788	1.71498e-09	1.69562e-08	FALSE	-0.541904	10.1798	0
YGL006W-A	YGL006W-A	-0.138939	0.097361	0.19858	FALSE
YGL007C-A	YGL007C-A	-0.14751	0.185287	0.325689	FALSE
YGL008C	PMA1	0.0151724	0.137271	0.258639	FALSE
YGL009C	LEU1	0.0142845	0.924301	0.95867	FALSE	0.0527916	1.04865	0.672708
YGL010W	MPO1	0.0239533	0.91286	0.953075	FALSE	0.0406674	2.56993	0.171895
YGL011C	SCL1	-0.153783	0.0028563	0.0107634	FALSE	-0.00126331	1.93826	0.33414
YGL013C	PDR1	0.00976529	0.956656	0.975012	FALSE	-0.0991264	0.463824	0.913899
YGL014W	PUF4	0.0279719	0.759053	0.853017	FALSE	-0.147771	1.09899	0.651618
YGL015C	YGL015C	-0.125149	0.282438	0.440417	FALSE
YGL016W	KAP122	-0.0228961	0.841954	0.908997	FALSE	-0.138665	1.37529	0.539302
YGL017W	ATE1	-0.072676	0.50427	0.657909	FALSE	-0.0229886	1.27722	0.579509
YGL018C	JAC1	0.17509	0.0172331	0.049508	FALSE	0.6431	2.69405	0.148325
YGL019W	CKB1	-0.234859	1.504e-08	1.37788e-07	FALSE	0.0503036	1.42465	0.523867
YGL020C	GET1	0.0646144	0.0697252	0.153162	FALSE	0.0312355	0.667349	0.836919
YGL021W	ALK1	0.00740375	0.873873	0.930771	FALSE	-0.0917555	1.34529	0.550467
YGL022W	STT3	-0.0574585	0.807465	0.887323	FALSE
YGL023C	PIB2	-0.057148	0.474111	0.630952	FALSE
YGL024W	YGL024W	-0.0812739	0.405855	0.568265	FALSE
YGL025C	PGD1	0.144463	0.210175	0.355008	FALSE
YGL026C	TRP5	-0.00446555	0.883325	0.936599	FALSE
YGL027C	CWH41	-0.00778708	0.935371	0.964616	FALSE
YGL028C	SCW11	-0.00627232	0.963571	0.979261	FALSE	-0.37034	1.75165	0.401952
YGL031C	RPL24A	0.266459	1.06946e-18	1.97771e-17	FALSE
YGL036W	YGL036W	-0.0678047	0.698023	0.811651	FALSE	-0.0117919	1.12547	0.644068
YGL037C	PNC1	0.164482	0.33385	0.49522	FALSE	-0.0158399	1.07234	0.665058
YGL038C	OCH1	0.204796	0.0128299	0.039242	FALSE	0.330416	1.84893	0.368399
YGL039W	YGL039W	0.118576	0.128124	0.245948	FALSE	0.147341	1.44663	0.516694
YGL040C	HEM2	0.0783819	0.0137946	0.0415251	FALSE	0.078077	1.93306	0.336428
YGL041W-A	YGL041W-A	-0.0173849	0.629249	0.761658	FALSE	-0.0549713	1.01361	0.689375
YGL042C	YGL042C	0.0153078	0.700208	0.813015	FALSE
YGL043W	DST1	0.0153078	0.700208	0.813015	FALSE	-0.0557854	2.24587	0.249548
YGL045W	RIM8	-0.247056	0.00622565	0.0212037	FALSE	0.295401	1.62514	0.443186
YGL047W	ALG13	0.0205601	0.829982	0.903248	FALSE	0.250523	1.61667	0.446764
YGL048C	RPT6	-0.118821	0.000475728	0.00216923	FALSE	0.0650061	1.36327	0.543279
YGL049C	TIF4632	0.0110391	0.934016	0.964338	FALSE	0.0226621	0.853984	0.754346
YGL050W	TYW3	-0.0804439	0.124214	0.239644	FALSE
YGL051W	MST27	-0.511218	0.000403857	0.00187752	FALSE
YGL056C	SDS23	-0.0995759	0.187012	0.327976	FALSE	-0.162552	2.10444	0.287026
YGL057C	GEP7	0.0477605	0.574252	0.717887	FALSE	-0.194278	1.72621	0.40817
YGL058W	RAD6	0.137155	0.00100381	0.00423313	FALSE	0.197702	3.31899	0.0626857
YGL059W	PKP2	-0.00514081	0.957631	0.975806	FALSE	-0.526261	2.07985	0.293257
YGL060W	YBP2	-0.362839	0.0111833	0.0347037	FALSE	-0.339526	1.85255	0.367069
YGL061C	DUO1	0.411542	0.000737493	0.00320479	FALSE	-0.49033	3.80871	0.0288603
YGL062W	PYC1	0.11868	0.000598361	0.00266751	FALSE	0.0961423	2.36102	0.22403
YGL063W	PUS2	0.0232493	0.905161	0.948958	FALSE
YGL065C	ALG2	-0.00388429	0.949582	0.97157	FALSE	0.0191557	0.335207	0.95433
YGL066W	SGF73	-0.0187682	0.830589	0.903712	FALSE	-0.0520424	1.82177	0.377625
YGL067W	NPY1	0.0850526	0.167352	0.302579	FALSE	0.141122	0.933727	0.722162
YGL070C	RPB9	0.0669675	0.113246	0.223582	FALSE	-0.119859	1.79706	0.386617
YGL071W	AFT1	-0.17147	0.0300736	0.0780627	FALSE	-0.157749	2.82266	0.125307
YGL072C	YGL072C	-0.132162	0.114804	0.225943	FALSE
YGL073W	HSF1	-0.132854	0.0941478	0.193448	FALSE
YGL075C	MPS2	0.226013	0.21095	0.356196	FALSE
YGL076C	RPL7A	0.313439	0.000962202	0.00408874	FALSE
YGL077C	HNM1	-0.132643	5.46413e-05	0.000304151	FALSE	-0.0438202	0.220227	0.979396
YGL078C	DBP3	-0.0117533	0.859115	0.92209	FALSE	-0.0456303	0.652147	0.842502
YGL079W	KXD1	0.100714	0.228237	0.377722	FALSE	0.138911	1.07499	0.664226
YGL080W	MPC1	-0.176128	1.14146e-07	9.57871e-07	FALSE	-0.029219	1.48848	0.500731
YGL082W	YGL082W	0.00238855	0.974228	0.986078	FALSE	0.155013	1.26704	0.584223
YGL083W	SCY1	0.0791361	0.614685	0.749097	FALSE	-0.156922	0.165636	0.990192
YGL084C	GUP1	-0.10232	0.256807	0.410521	FALSE	-0.123657	1.07737	0.663475
YGL085W	LCL3	0.207884	0.00707266	0.0237005	FALSE	0.0259738	0.631083	0.848245
YGL086W	MAD1	-0.046975	0.530903	0.679692	FALSE	-0.0266746	0.502351	0.896046
YGL087C	MMS2	0.0489739	0.557065	0.703017	FALSE	0.185554	3.82759	0.0278724
YGL088W	YGL088W	-0.0106619	0.89753	0.944838	FALSE	-0.194487	3.63881	0.037408
YGL089C	MF(ALPHA)2	-0.103022	0.546948	0.694359	FALSE
YGL090W	LIF1	0.28323	0.0957995	0.195898	FALSE
YGL091C	NBP35	0.186673	0.00485656	0.0171505	FALSE	0.0873035	1.70848	0.412101
YGL092W	NUP145	0.00316697	0.963536	0.979261	FALSE	-0.0637044	1.06967	0.665863
YGL093W	SPC105	0.103029	0.277559	0.434256	FALSE	0.171945	0.486763	0.903273
YGL094C	PAN2	0.331299	0.00587268	0.0201389	FALSE	0.013466	0.0962879	0.996398
YGL095C	VPS45	-0.286772	4.6957e-06	3.21613e-05	FALSE	-0.142047	1.06906	0.665983
YGL096W	TOS8	0.758406	1.8306e-16	2.93896e-15	FALSE	0.869055	11.2924	0
YGL097W	SRM1	-0.00570433	0.904319	0.948958	FALSE
YGL098W	USE1	-0.201173	0.114065	0.224666	FALSE
YGL099W	LSG1	0.0219774	0.769132	0.859829	FALSE	-0.30812	1.44901	0.515895
YGL100W	SEH1	0.017841	0.677162	0.795765	FALSE	0.127256	2.36976	0.222127
YGL101W	YGL101W	-0.227738	0.0256496	0.068817	FALSE	-0.303971	3.38978	0.0564384
YGL102C	YGL102C	0.150994	4.50567e-179	7.49894e-177	TRUE
YGL103W	RPL28	0.151028	3.66071e-179	6.30274e-177	TRUE	0.142762	38.7131	0
YGL104C	VPS73	0.0719713	0.609887	0.746364	FALSE	-0.222476	0.815634	0.770496
YGL105W	ARC1	-0.111976	3.5877e-10	3.79521e-09	FALSE	-0.0606061	0.972856	0.70513
YGL106W	MLC1	1.32473	0	0	FALSE	0.270529	9.144	0
YGL107C	RMD9	0.139615	0.149503	0.275551	FALSE	0.243921	3.30964	0.064089
YGL108C	YGL108C	0.0865551	0.168854	0.303706	FALSE	-0.0683	1.51961	0.489972
YGL109W	YGL109W	0.0785713	0.21377	0.359863	FALSE
YGL110C	CUE3	-0.0584084	0.393762	0.557746	FALSE	-0.119226	0.750699	0.799209
YGL111W	NSA1	-0.0778376	0.148053	0.273485	FALSE	0.000810208	0.831422	0.76373
YGL113W	SLD3	0.253449	0.170258	0.305571	FALSE	0.0156652	0.899711	0.733996
YGL114W	YGL114W	-0.0584056	0.48352	0.639435	FALSE	-0.102881	0.758017	0.795974
YGL115W	SNF4	0.202154	1.86996e-08	1.69758e-07	FALSE	0.113519	1.08844	0.658287
YGL116W	CDC20	0.0982345	0.307055	0.467132	FALSE	0.02106	0.273471	0.969164
YGL117W	YGL117W	0.122908	0.36092	0.525079	FALSE	0.00159803	0.260251	0.97087
YGL119W	COQ8	-0.112167	0.27666	0.433301	FALSE	-0.080256	0.61106	0.855747
YGL120C	PRP43	0.0729167	0.275552	0.432244	FALSE	-0.248075	0.886995	0.740271
YGL121C	GPG1	-0.0303891	0.695538	0.809515	FALSE	-0.183651	2.20687	0.261905
YGL122C	NAB2	0.67232	0.000299624	0.00143467	FALSE	0.0531763	0.373332	0.942915
YGL123C-A	YGL123C-A	-0.0713395	0.335617	0.496956	FALSE
YGL123W	RPS2	0.0548066	2.01686e-17	3.43692e-16	FALSE	0.0555397	1.79134	0.38877
YGL124C	MON1	0.124704	0.147568	0.27279	FALSE
YGL125W	MET13	0.625678	0.00285256	0.0107574	FALSE
YGL126W	SCS3	-0.403833	8.11621e-14	1.13513e-12	FALSE	-0.684358	17.4237	0
YGL127C	SOH1	0.0781057	0.186305	0.326852	FALSE	-0.0918116	1.12807	0.643667
YGL130W	CEG1	0.0744408	0.361761	0.526013	FALSE	-0.0268016	1.6413	0.437133
YGL131C	SNT2	0.392551	0.0516497	0.120734	FALSE
YGL134W	PCL10	0.167216	0.0933985	0.192384	FALSE	0.550304	1.95083	0.329089
YGL135W	RPL1B	-0.0650377	1.42752e-14	2.10876e-13	FALSE	-0.0458371	3.51842	0.0449749
YGL137W	SEC27	-0.0226458	0.675275	0.794581	FALSE	-0.0343813	1.04397	0.675148
YGL139W	FLC3	0.191987	0.0216338	0.0599098	FALSE	0.0628886	0.292212	0.963705
YGL140C	YGL140C	0.164268	0.0141184	0.0422116	FALSE	0.0728005	0.712268	0.816485
YGL141W	HUL5	0.00399857	0.964363	0.979668	FALSE	-0.15419	0.906432	0.732744
YGL142C	GPI10	0.202796	0.00481448	0.0170366	FALSE	-0.0631493	0.804763	0.774453
YGL143C	MRF1	0.294773	0.0769476	0.16468	FALSE	-0.101675	0.432854	0.926999
YGL145W	TIP20	0.209547	0.0187735	0.0531986	FALSE	-0.240561	1.39087	0.533598
YGL148W	ARO2	0.00954197	0.78435	0.870249	FALSE	-0.0714081	1.1509	0.635126
YGL150C	INO80	-0.00650513	0.923328	0.958457	FALSE	-0.0374351	0.664273	0.838267
YGL151W	NUT1	0.101938	0.340033	0.501709	FALSE	0.0684565	2.43902	0.203256
YGL152C	YGL152C	-0.103652	0.10652	0.212827	FALSE
YGL153W	PEX14	-0.103652	0.10652	0.212827	FALSE	-0.286966	1.54335	0.476848
YGL154C	LYS5	-0.03909	0.533428	0.682225	FALSE	-0.308329	1.96792	0.323845
YGL155W	CDC43	-0.0228124	0.722809	0.826691	FALSE	0.0576552	0.68662	0.827992
YGL156W	AMS1	0.156511	0.185273	0.325689	FALSE	0.112802	0.609919	0.856108
YGL157W	ARI1	0.100454	0.0475535	0.112582	FALSE	-0.0245857	1.89185	0.348528
YGL159W	YGL159W	-0.338154	7.06642e-09	6.61963e-08	FALSE	0.067682	0.29843	0.962499
YGL160W	AIM14	-0.125163	0.540556	0.689398	FALSE	0.149468	2.0813	0.292953
YGL161C	YIP5	0.160143	0.00063899	0.00282343	FALSE	0.216725	3.69511	0.0348169
YGL162W	SUT1	0.19607	0.00111296	0.00465799	FALSE
YGL163C	RAD54	0.285032	0.0200916	0.0561372	FALSE	-0.221328	4.55458	0.00722019
YGL164C	YRB30	-0.0171715	0.799803	0.881548	FALSE	0.039951	1.13549	0.640088
YGL165C	YGL165C	0.041284	0.529979	0.679029	FALSE
YGL166W	CUP2	0.0499718	0.445687	0.60605	FALSE	-0.0458746	2.13152	0.28028
YGL167C	PMR1	0.105206	0.072507	0.157815	FALSE	0.258724	4.87549	0.00379147
YGL168W	HUR1	0.102953	0.09544	0.19554	FALSE
YGL169W	SUA5	0.166887	0.00031216	0.00148865	FALSE	0.536566	5.08349	0.00296296
YGL170C	SPO74	-0.00466209	0.953379	0.973159	FALSE
YGL171W	ROK1	-0.0813334	0.200972	0.344704	FALSE	0.123955	1.3881	0.534664
YGL172W	NUP49	0.042062	0.525896	0.675359	FALSE	0.138003	1.16047	0.632547
YGL173C	XRN1	0.0497218	0.39787	0.561494	FALSE	0.14952	1.08029	0.662496
YGL174W	BUD13	0.185233	0.0936942	0.192693	FALSE	-0.0394871	0.446491	0.919817
YGL175C	SAE2	0.000306501	0.998866	0.999812	FALSE
YGL176C	YGL176C	-0.192771	0.0747787	0.161353	FALSE	-0.327876	1.10464	0.650004
YGL178W	MPT5	0.587685	0.00984202	0.0313001	FALSE	-0.0160719	0.197768	0.983834
YGL179C	TOS3	0.360089	0.0584944	0.13318	FALSE
YGL180W	ATG1	0.259958	0.118126	0.230391	FALSE
YGL181W	GTS1	0.206302	0.00812025	0.0264823	FALSE	0.0110164	0.27342	0.969174
YGL184C	STR3	-0.236418	0.0556057	0.128121	FALSE	-0.316654	1.05924	0.668114
YGL185C	YGL185C	-0.302286	0.00597715	0.020455	FALSE	0.0934907	1.17235	0.629118
YGL186C	TPN1	0.263586	1.02227e-07	8.66591e-07	FALSE	0.370701	4.37144	0.0112654
YGL189C	RPS26A	0.073855	4.11169e-27	1.04743e-25	FALSE	-0.0178941	0.754708	0.797437
YGL190C	CDC55	-0.212625	0.0349207	0.0880602	FALSE	-0.209642	1.68349	0.42166
YGL191W	COX13	0.0874378	8.57763e-06	5.60578e-05	FALSE
YGL192W	IME4	-0.245379	0.0313256	0.080681	FALSE
YGL193C	YGL193C	-0.10071	0.572401	0.716829	FALSE
YGL194C	HOS2	0.0793411	0.593795	0.734775	FALSE
YGL194C-A	YGL194C-A	0.216654	0.000147039	0.000759222	FALSE	-0.00824828	0.648227	0.843562
YGL195W	GCN1	-0.00306775	0.95287	0.973159	FALSE	-0.0269297	0.705881	0.819391
YGL196W	DSD1	-0.0766761	0.170778	0.306242	FALSE	0.159519	2.65878	0.154851
YGL197W	MDS3	0.191584	0.226062	0.375742	FALSE
YGL198W	YIP4	0.0485935	0.556994	0.703017	FALSE	0.137951	1.57303	0.466271
YGL200C	EMP24	0.0423255	0.0841715	0.17703	FALSE
YGL201C	MCM6	0.560065	1.78088e-14	2.59241e-13	FALSE
YGL202W	ARO8	-0.16116	4.23867e-09	4.03887e-08	FALSE	-0.256376	8.6392	0
YGL203C	KEX1	0.181253	0.107723	0.214801	FALSE	-0.397196	3.20392	0.0730073
YGL204C	YGL204C	-2.6538	3.44325e-57	1.71921e-55	FALSE	-1.93408	21.8989	0
YGL206C	CHC1	0.0725115	0.503566	0.657163	FALSE	-0.0166156	0.520363	0.889557
YGL207W	SPT16	-0.266535	0.00272135	0.0103486	FALSE	-0.128665	1.1234	0.644387
YGL208W	SIP2	-0.591186	1.79627e-07	1.48983e-06	FALSE	-0.376304	1.41091	0.528525
YGL209W	MIG2	0.317265	0.00507439	0.0177788	FALSE	0.222297	1.28572	0.577408
YGL210W	YPT32	0.0601772	0.608223	0.74579	FALSE	0.00981578	0.32929	0.955456
YGL211W	NCS6	-0.107754	0.076468	0.164005	FALSE	-0.331654	2.69856	0.14756
YGL212W	VAM7	0.0909718	0.601633	0.740986	FALSE
YGL213C	SKI8	0.0464199	0.429605	0.591335	FALSE	-0.163023	1.58629	0.461644
YGL214W	YGL214W	0.0596461	0.390483	0.554643	FALSE
YGL215W	CLG1	0.17401	0.011937	0.0367683	FALSE	0.12152	0.747215	0.800921
YGL216W	KIP3	0.294901	0.0567693	0.130381	FALSE
YGL217C	YGL217C	1.5021	9.75486e-09	9.05316e-08	FALSE
YGL220W	BOL2	0.00123435	0.976106	0.98753	FALSE	-0.0238275	0.685363	0.82839
YGL221C	NIF3	0.385374	5.3641e-06	3.63405e-05	FALSE	0.352371	4.1012	0.0194426
YGL222C	EDC1	0.240409	0.0290737	0.0759628	FALSE	-0.555199	3.22136	0.0722512
YGL223C	COG1	-0.0438828	0.691541	0.805991	FALSE	0.37344	3.25166	0.0706549
YGL225W	VRG4	0.0481093	0.663133	0.785161	FALSE	-0.112611	3.77905	0.0307229
YGL226C-A	OST5	0.0781256	0.00257427	0.00984176	FALSE	0.283401	11.7962	0
YGL226W	MTC3	-0.389798	3.25409e-05	0.000190553	FALSE	-0.141074	0.867854	0.74849
YGL228W	SHE10	0.0145931	0.811002	0.889768	FALSE	0.0281026	0.942979	0.717935
YGL229C	SAP4	0.0546651	0.70688	0.81776	FALSE
YGL231C	EMC4	0.0865804	0.0394424	0.096965	FALSE	0.120358	1.72863	0.40762
YGL232W	TAN1	-0.105368	0.0388416	0.0958105	FALSE	-0.0627523	0.897281	0.735182
YGL233W	SEC15	0.103287	0.449441	0.609633	FALSE	0.112272	1.15805	0.633182
YGL234W	ADE5,7	0.150282	0.502737	0.656252	FALSE	0.164378	3.72619	0.0335902
YGL236C	MTO1	0.425134	0.000272039	0.00131873	FALSE	0.440167	1.59119	0.459732
YGL237C	HAP2	-0.143004	0.115887	0.227268	FALSE	-0.156237	2.91529	0.110772
YGL238W	CSE1	0.00422524	0.956414	0.975012	FALSE	0.121198	0.731803	0.808732
YGL241W	KAP114	-0.0288551	0.776376	0.864699	FALSE	-0.300006	1.8951	0.347694
YGL242C	YGL242C	-0.1653	0.000118408	0.000625701	FALSE	-0.136524	1.86732	0.359475
YGL243W	TAD1	-0.113034	0.0153581	0.0450282	FALSE	-0.178572	1.69288	0.418758
YGL244W	RTF1	-0.0909718	0.669922	0.791136	FALSE	0.00247625	0.36589	0.945161
YGL245W	GUS1	-0.290931	0.00114301	0.00477576	FALSE	-0.0194904	0.618848	0.853477
YGL246C	RAI1	0.200884	4.13176e-05	0.000237125	FALSE	0.237356	2.6433	0.157784
YGL247W	BRR6	0.323155	5.79686e-09	5.4714e-08	FALSE	0.776296	8.60164	0
YGL248W	PDE1	0.0456948	0.618473	0.752996	FALSE	-0.150729	0.673209	0.833937
YGL249W	ZIP2	-0.968987	1.5629e-16	2.52542e-15	FALSE
YGL250W	RMR1	-0.10834	0.173279	0.309167	FALSE	0.126795	0.910179	0.732091
YGL251C	HFM1	-0.040822	0.804584	0.885255	FALSE
YGL252C	RTG2	0.0720624	0.254295	0.407794	FALSE	0.145312	1.00373	0.69291
YGL253W	HXK2	0.274876	0.0233317	0.0635545	FALSE	0.10634	4.34536	0.0125357
YGL254W	FZF1	-0.46609	0.0387565	0.0957385	FALSE
YGL255W	ZRT1	0.393865	1.18724e-45	4.74232e-44	TRUE	-0.0423209	1.75345	0.401458
YGL256W	ADH4	-0.0939011	0.0460023	0.109585	FALSE
YGL257C	MNT2	0.359228	9.22585e-10	9.43948e-09	FALSE
YGL263W	COS12	-5.02667	7.26882e-31	2.0739e-29	FALSE
YGR001C	EFM5	-0.107076	0.401233	0.564484	FALSE	-0.185731	2.8298	0.124569
YGR002C	SWC4	-0.171107	0.0413409	0.100789	FALSE	-0.243159	1.83621	0.370571
YGR003W	CUL3	0.0597243	0.585777	0.727378	FALSE	0.49938	1.89553	0.347583
YGR004W	PEX31	-0.172838	0.111076	0.220431	FALSE
YGR007W	ECT1	0.0337019	0.19691	0.340079	FALSE	-0.20995	2.75889	0.13785
YGR008C	STF2	0.0416819	0.126635	0.243468	FALSE	-0.21874	9.55216	0
YGR009C	SEC9	-0.233034	0.0163719	0.0475539	FALSE	-0.0978651	1.25859	0.587659
YGR010W	NMA2	0.391355	5.66129e-05	0.000314076	FALSE
YGR011W	YGR011W	0.35087	0.000242352	0.00118402	FALSE	-0.103049	0.571813	0.871577
YGR012W	MCY1	-0.0132225	0.89223	0.941124	FALSE	-0.0492683	0.424173	0.930915
YGR013W	SNU71	0.251969	0.0105227	0.0330127	FALSE	0.150487	0.742664	0.803211
YGR014W	MSB2	-0.00329128	0.956444	0.975012	FALSE	-0.110059	1.30502	0.568752
YGR015C	YGR015C	0.302506	0.104365	0.209443	FALSE
YGR016W	YGR016W	0.149869	0.186101	0.326608	FALSE
YGR017W	YGR017W	0.0381914	0.468673	0.626696	FALSE	0.0147949	1.84092	0.369145
YGR018C	YGR018C	0.0598613	0.264324	0.419374	FALSE
YGR019W	UGA1	0.0126936	0.843708	0.910273	FALSE	-0.108391	1.45047	0.515386
YGR021W	YGR021W	0.0613978	0.158539	0.289217	FALSE	0.0610486	1.21485	0.605194
YGR023W	MTL1	0.0131746	0.930956	0.962817	FALSE
YGR024C	THG1	-0.234907	1.94992e-05	0.000119313	FALSE	-0.103308	0.693177	0.825406
YGR026W	YGR026W	-0.126828	0.000478002	0.00217563	FALSE	-0.178869	3.20038	0.0731439
YGR027C	RPS25A	-0.0224373	0.794706	0.877093	FALSE	-0.0149531	1.42816	0.523038
YGR028W	MSP1	-0.0233392	0.682562	0.799632	FALSE
YGR029W	ERV1	-0.0226274	0.673159	0.79296	FALSE	-0.0796838	0.701467	0.821457
YGR030C	POP6	0.236436	5.11604e-05	0.000286372	FALSE	0.280665	2.63132	0.15961
YGR032W	GSC2	0.617042	7.83186e-08	6.75379e-07	FALSE	0.572151	8.73722	0
YGR033C	TIM21	-0.272777	0.135172	0.255842	FALSE	0.180267	1.75965	0.399749
YGR034W	RPL26B	-0.283473	0.0499641	0.117509	FALSE	0.00995961	0.586993	0.865386
YGR035C	YGR035C	-0.00936014	0.939456	0.966359	FALSE	0.0860253	0.62119	0.852598
YGR035W-A	YGR035W-A	0.0133534	0.883179	0.936599	FALSE
YGR037C	ACB1	0.322787	1.75483e-18	3.20948e-17	FALSE	0.915029	88.3439	0
YGR038W	ORM1	-0.0822847	0.176983	0.314251	FALSE	0.0194948	0.447154	0.919522
YGR039W	YGR039W	0.0622988	0.712534	0.82019	FALSE
YGR040W	KSS1	-0.281412	0.179078	0.317182	FALSE
YGR041W	BUD9	-0.133888	0.207994	0.352757	FALSE
YGR042W	MTE1	0.154126	0.055444	0.127815	FALSE	0.349805	1.78771	0.389914
YGR043C	NQM1	-0.145765	0.421535	0.584646	FALSE	-0.122877	2.08416	0.292339
YGR046W	TAM41	0.0956923	0.224477	0.373854	FALSE	-0.0018385	1.87625	0.355743
YGR047C	TFC4	0.011102	0.919981	0.956175	FALSE	0.0465298	0.307412	0.96112
YGR048W	UFD1	-0.0477221	0.450937	0.610998	FALSE	-0.0970339	1.11098	0.648512
YGR049W	SCM4	0.309735	3.00004e-09	2.90294e-08	FALSE	0.364056	3.86387	0.0252836
YGR050C	YGR050C	-0.0412755	0.619617	0.753838	FALSE	-0.00210983	1.21596	0.604638
YGR052W	FMP48	1.28192	4.16853e-10	4.39103e-09	FALSE	0.71501	3.67139	0.0351088
YGR054W	YGR054W	-0.0333261	0.385138	0.549113	FALSE	-0.503015	8.34828	0
YGR056W	RSC1	0.0661564	0.475191	0.631691	FALSE	-0.284334	2.32983	0.229113
YGR058W	PEF1	-0.0744422	0.506189	0.659552	FALSE
YGR059W	SPR3	1.44053	5.68893e-10	5.9674e-09	FALSE
YGR060W	ERG25	-0.0127378	0.517184	0.667635	FALSE
YGR061C	ADE6	-0.0781035	0.0876662	0.182687	FALSE
YGR062C	COX18	0.253771	0.0320515	0.0822792	FALSE	0.135398	0.897083	0.735279
YGR063C	SPT4	0.0549753	0.115525	0.226915	FALSE	0.0137192	0.422561	0.931523
YGR064W	YGR064W	0.0705131	0.0388577	0.0958105	FALSE
YGR065C	VHT1	0.351737	1.6512e-06	1.2342e-05	FALSE	0.155979	1.30109	0.570686
YGR069W	YGR069W	-0.194324	0.390572	0.554643	FALSE
YGR070W	ROM1	0.182322	0.460802	0.620157	FALSE	0.245065	0.881924	0.74286
YGR072W	UPF3	0.194323	0.0582369	0.132836	FALSE	0.319592	1.94976	0.32947
YGR073C	YGR073C	0.317534	0.00291466	0.0109585	FALSE	0.235766	0.729393	0.809864
YGR074W	SMD1	0.393153	0.00540459	0.0187919	FALSE	-0.28025	7.9186	0
YGR076C	MRPL25	0.0647158	0.202028	0.345928	FALSE	0.0590441	0.810505	0.77271
YGR077C	PEX8	-0.0606883	0.63496	0.765602	FALSE	0.0258002	0.297395	0.9627
YGR080W	TWF1	-0.220159	0.00243358	0.00937566	FALSE	-0.21216	2.56694	0.172453
YGR081C	SLX9	0.0501848	0.198302	0.341422	FALSE	0.153674	1.21164	0.606788
YGR083C	GCD2	-0.0345421	0.606096	0.744608	FALSE	-0.0739215	0.644031	0.844539
YGR084C	MRP13	0.0902684	0.0741933	0.160367	FALSE	0.111473	2.09235	0.290515
YGR085C	RPL11B	0.176206	0.0293759	0.0766321	FALSE
YGR086C	PIL1	0.15828	2.50651e-17	4.2568e-16	FALSE
YGR087C	PDC6	-0.575646	0.0151055	0.0444435	FALSE
YGR088W	CTT1	1.03539	7.00393e-31	2.00981e-29	FALSE	0.153434	2.75066	0.138722
YGR089W	NNF2	0.134846	0.207669	0.352444	FALSE	0.153467	0.594041	0.863419
YGR090W	UTP22	0.0187846	0.838748	0.907054	FALSE	0.179153	2.39864	0.214065
YGR091W	PRP31	0.0344025	0.813058	0.891435	FALSE	0.18894	0.949613	0.714886
YGR093W	DRN1	-0.123815	0.189898	0.331409	FALSE	0.310193	0.881104	0.743279
YGR094W	VAS1	0.195303	1.97536e-06	1.45471e-05	FALSE
YGR095C	RRP46	0.0720698	0.142854	0.266447	FALSE
YGR096W	TPC1	0.470004	0.0434395	0.104729	FALSE
YGR097W	ASK10	-0.116484	0.109165	0.217157	FALSE	0.162237	0.89665	0.73549
YGR098C	ESP1	0.0739171	0.505888	0.659331	FALSE	0.140954	1.76954	0.39644
YGR099W	TEL2	0.0733889	0.425462	0.587852	FALSE	0.161269	0.567163	0.873068
YGR100W	MDR1	-0.0708486	0.45437	0.61415	FALSE	-0.0123686	0.42379	0.931059
YGR101W	PCP1	0.32424	0.0903769	0.187397	FALSE	0.0921893	0.73885	0.805139
YGR102C	GTF1	-0.0751107	0.161646	0.294239	FALSE	-0.0662573	0.580973	0.868008
YGR103W	NOP7	0.0224051	0.554766	0.700855	FALSE	0.0260796	1.59209	0.45926
YGR104C	SRB5	0.0537541	0.331895	0.493788	FALSE	-0.0334276	0.807302	0.773713
YGR106C	VOA1	-0.00699609	0.780558	0.867646	FALSE	-0.0135741	0.409345	0.933737
YGR107W	YGR107W	-0.0550598	0.773874	0.863067	FALSE
YGR108W	CLB1	0.300508	0.00387908	0.0141684	FALSE	-0.0891746	0.566013	0.873391
YGR110W	CLD1	0.535301	0.00802646	0.0262622	FALSE
YGR111W	YGR111W	0.11294	0.0484367	0.114347	FALSE	0.668801	12.5337	0
YGR112W	SHY1	0.228074	0.0190807	0.0539161	FALSE	-0.381251	1.734	0.406567
YGR113W	DAM1	-0.0584123	0.376667	0.541422	FALSE	-0.0156868	0.489393	0.901861
YGR114C	YGR114C	0.0399682	0.422425	0.58523	FALSE
YGR115C	YGR115C	0.0386168	0.43321	0.594725	FALSE
YGR116W	SPT6	-0.102394	0.094373	0.193831	FALSE	-0.347814	7.076	0.000787402
YGR117C	YGR117C	0.0576091	0.397088	0.561025	FALSE	0.308053	2.22117	0.256535
YGR118W	RPS23A	-0.155309	0.0681181	0.150626	FALSE	0.00163002	0.990469	0.696913
YGR119C	NUP57	-0.119962	0.0230696	0.0630469	FALSE	0.000178929	0.213261	0.980279
YGR120C	COG2	-0.0801416	0.255975	0.409642	FALSE	-0.636045	5.95616	0.00120482
YGR121C	MEP1	0.0895822	0.572556	0.716844	FALSE
YGR122C-A	YGR122C-A	2.01116	2.01695e-11	2.35296e-10	FALSE
YGR122W	YGR122W	0.532508	0.000448041	0.00206181	FALSE
YGR123C	PPT1	0.00805004	0.928505	0.961632	FALSE	0.0249	1.38809	0.534668
YGR124W	ASN2	0.126551	0.000595047	0.00265511	FALSE	0.0671307	0.567856	0.872874
YGR125W	YGR125W	-0.190606	3.37e-08	3.0209e-07	FALSE	-0.210783	4.48923	0.00825293
YGR127W	YGR127W	0.711158	3.54618e-10	3.75926e-09	FALSE	0.279157	1.41418	0.527243
YGR128C	UTP8	0.0119206	0.924278	0.95867	FALSE	0.0580007	1.40594	0.529647
YGR129W	SYF2	0.22369	0.112187	0.222194	FALSE
YGR130C	YGR130C	0.100062	0.222552	0.371222	FALSE	-0.111446	2.56094	0.173577
YGR131W	FHN1	-0.136029	0.244769	0.396796	FALSE	-0.802309	6.36377	0.000787402
YGR132C	PHB1	0.245413	1.76447e-14	2.57602e-13	FALSE	0.153569	2.93271	0.108762
YGR133W	PEX4	0.142155	0.142502	0.265986	FALSE	0.0793738	0.396773	0.937033
YGR136W	LSB1	0.14901	0.000102381	0.000548484	FALSE
YGR137W	YGR137W	0.149655	9.66196e-05	0.000519292	FALSE	-0.0024889	3.17784	0.0769958
YGR138C	TPO2	-0.230043	2.3722e-05	0.000141849	FALSE	-0.144948	4.24946	0.0162264
YGR139W	YGR139W	-4.27107e-14	1	1	FALSE
YGR140W	CBF2	0.0235867	0.8488	0.913571	FALSE	-0.233836	1.4883	0.500842
YGR141W	VPS62	-0.00487713	0.961016	0.977824	FALSE	-0.284864	1.11045	0.648726
YGR142W	BTN2	-0.254172	0.00143455	0.00586624	FALSE	-0.210699	1.00073	0.694116
[truncated: 3,100 more rows]
